# Supplementary material for: Mitochondrial acetyl-CoA reversibly regulates locus-specific histone acetylation and gene expression
Source: Life Sci Alliance. 2019 Feb 8;2(1):e201800228. doi: 10.26508/lsa.201800228 (PMC6369536; doi:10.26508/lsa.201800228)
Supplement: Supplementary file 1 [file LSA-2018-00228_TableS1.xlsx]

## Sheet: Cluster A H3K9ac Depleted DEGs
HGNC Approved Gene Symbol	HGNC Approved Name
AACS	acetoacetyl-CoA synthetase
ABAT	4-aminobutyrate aminotransferase
ABCC5	ATP binding cassette subfamily C member 5
ABHD15	abhydrolase domain containing 15
ABHD17B	abhydrolase domain containing 17B
ACACB	acetyl-CoA carboxylase beta
ACAD11	acyl-CoA dehydrogenase family member 11
ACAT1	acetyl-CoA acetyltransferase 1
ACLY	ATP citrate lyase
ACO2	aconitase 2
ACOT9	acyl-CoA thioesterase 9
ACP2	acid phosphatase 2, lysosomal
ACSF2	acyl-CoA synthetase family member 2
ACSS3	acyl-CoA synthetase short-chain family member 3
ACTR6	ARP6 actin-related protein 6 homolog
ACVR1	activin A receptor type 1
ADAMTS14	ADAM metallopeptidase with thrombospondin type 1 motif 14
ADAMTS15	ADAM metallopeptidase with thrombospondin type 1 motif 15
ADAMTS19-AS1	ADAMTS19 antisense RNA 1
ADAMTS7	ADAM metallopeptidase with thrombospondin type 1 motif 7
ADCY10	adenylate cyclase 10, soluble
ADGRG2	adhesion G protein-coupled receptor G2
ADI1	acireductone dioxygenase 1
ADM	adrenomedullin
ADORA1	adenosine A1 receptor
ADPRHL1	ADP-ribosylhydrolase like 1
ADRA1B	adrenoceptor alpha 1B
ADRA1D	adrenoceptor alpha 1D
ADRB2	adrenoceptor beta 2
AFG3L2	AFG3 like matrix AAA peptidase subunit 2
AGGF1	angiogenic factor with G-patch and FHA domains 1
AGPAT3	1-acylglycerol-3-phosphate O-acyltransferase 3
AGTPBP1	ATP/GTP binding protein 1
AHCTF1	AT-hook containing transcription factor 1
AHI1	Abelson helper integration site 1
AIM1L	absent in melanoma 1-like
AJUBA	ajuba LIM protein
AK4	adenylate kinase 4
AK7	adenylate kinase 7
AKAP1	A-kinase anchoring protein 1
AKIP1	A-kinase interacting protein 1
AKNA	AT-hook transcription factor
AKR1B15	aldo-keto reductase family 1 member B15
AKR7A2	aldo-keto reductase family 7 member A2
AKT1S1	AKT1 substrate 1
ALAD	aminolevulinate dehydratase
ALDH1A2	aldehyde dehydrogenase 1 family member A2
ALDH1A3	aldehyde dehydrogenase 1 family member A3
ALDH1B1	aldehyde dehydrogenase 1 family member B1
ALDH3A2	aldehyde dehydrogenase 3 family member A2
ALDH4A1	aldehyde dehydrogenase 4 family member A1
ALDH9A1	aldehyde dehydrogenase 9 family member A1
ALG1	ALG1, chitobiosyldiphosphodolichol beta-mannosyltransferase
ALKBH8	alkB homolog 8, tRNA methyltransferase
AMER2	APC membrane recruitment protein 2
AMIGO1	adhesion molecule with Ig like domain 1
AMN1	antagonist of mitotic exit network 1 homolog
ANAPC5	anaphase promoting complex subunit 5
ANGEL2	angel homolog 2
ANKRD11	ankyrin repeat domain 11
ANKRD12	ankyrin repeat domain 12
ANKRD31	ankyrin repeat domain 31
ANKRD36	ankyrin repeat domain 36
ANKRD42	ankyrin repeat domain 42
ANLN	anillin actin binding protein
ANO10	anoctamin 10
ANO7	anoctamin 7
ANXA3	annexin A3
ANXA6	annexin A6
AP1S1	adaptor related protein complex 1 sigma 1 subunit
AP3B2	adaptor related protein complex 3 beta 2 subunit
AP5S1	adaptor related protein complex 5 sigma 1 subunit
APEH	acylaminoacyl-peptide hydrolase
APEX1	apurinic/apyrimidinic endodeoxyribonuclease 1
APEX2	apurinic/apyrimidinic endodeoxyribonuclease 2
APH1A	aph-1 homolog A, gamma-secretase subunit
APLN	apelin
APLP2	amyloid beta precursor like protein 2
APMAP	adipocyte plasma membrane associated protein
AQP4	aquaporin 4
ARC	activity regulated cytoskeleton associated protein
AREG	amphiregulin
ARF3	ADP ribosylation factor 3
ARFGAP3	ADP ribosylation factor GTPase activating protein 3
ARG2	arginase 2
ARHGAP1	Rho GTPase activating protein 1
ARHGAP21	Rho GTPase activating protein 21
ARHGAP31	Rho GTPase activating protein 31
ARHGEF2	Rho/Rac guanine nucleotide exchange factor 2
ARID3C	AT-rich interaction domain 3C
ARID4B	AT-rich interaction domain 4B
ARL4C	ADP ribosylation factor like GTPase 4C
ARL6IP1	ADP ribosylation factor like GTPase 6 interacting protein 1
ARMC1	armadillo repeat containing 1
ARMC3	armadillo repeat containing 3
ARMC7	armadillo repeat containing 7
ARMCX3	armadillo repeat containing, X-linked 3
ARMCX4	armadillo repeat containing, X-linked 4
ARMT1	acidic residue methyltransferase 1
ARNTL	aryl hydrocarbon receptor nuclear translocator like
ARRDC4	arrestin domain containing 4
ARTN	artemin
ASB13	ankyrin repeat and SOCS box containing 13
ASGR1	asialoglycoprotein receptor 1
ASIC1	acid sensing ion channel subunit 1
ASNS	asparagine synthetase (glutamine-hydrolyzing)
ASPDH	aspartate dehydrogenase domain containing
ASPHD2	aspartate beta-hydroxylase domain containing 2
ASRGL1	asparaginase like 1
ASS1	argininosuccinate synthase 1
ASXL1	additional sex combs like 1, transcriptional regulator
ATAD1	ATPase family, AAA domain containing 1
ATF3	activating transcription factor 3
ATG101	autophagy related 101
ATG4A	autophagy related 4A cysteine peptidase
ATG4C	autophagy related 4C cysteine peptidase
ATG7	autophagy related 7
ATL1	atlastin GTPase 1
ATL2	atlastin GTPase 2
ATMIN	ATM interactor
ATOH1	atonal bHLH transcription factor 1
ATOH8	atonal bHLH transcription factor 8
ATP12A	ATPase H+/K+ transporting non-gastric alpha2 subunit
ATP1B2	ATPase Na+/K+ transporting subunit beta 2
ATP2B3	ATPase plasma membrane Ca2+ transporting 3
ATP2C1	ATPase secretory pathway Ca2+ transporting 1
ATP5B	ATP synthase, H+ transporting, mitochondrial F1 complex, beta polypeptide
ATP6V0A1	ATPase H+ transporting V0 subunit a1
ATP6V0D1	ATPase H+ transporting V0 subunit d1
ATP6V0E2	ATPase H+ transporting V0 subunit e2
ATP6V1C1	ATPase H+ transporting V1 subunit C1
ATP6V1G2	ATPase H+ transporting V1 subunit G2
ATP8B3	ATPase phospholipid transporting 8B3
ATRNL1	attractin like 1
ATXN2	ataxin 2
ATXN3	ataxin 3
ATXN7L1	ataxin 7 like 1
ATXN7L3	ataxin 7 like 3
AURKA	aurora kinase A
AVEN	apoptosis and caspase activation inhibitor
AVPR1A	arginine vasopressin receptor 1A
AZI2	5-azacytidine induced 2
B3GALT6	beta-1,3-galactosyltransferase 6
B3GNT2	UDP-GlcNAc:betaGal beta-1,3-N-acetylglucosaminyltransferase 2
B4GALT3	beta-1,4-galactosyltransferase 3
BAG1	BCL2 associated athanogene 1
BAG4	BCL2 associated athanogene 4
BAHCC1	BAH domain and coiled-coil containing 1
BASP1	brain abundant membrane attached signal protein 1
BBOF1	basal body orientation factor 1
BBS10	Bardet-Biedl syndrome 10
BBS5	Bardet-Biedl syndrome 5
BBS9	Bardet-Biedl syndrome 9
BCAS4	breast carcinoma amplified sequence 4
BCKDHB	branched chain keto acid dehydrogenase E1 subunit beta
BCKDK	branched chain ketoacid dehydrogenase kinase
BCL10	B-cell CLL/lymphoma 10
BCL2L1	BCL2 like 1
BCL7B	BCL tumor suppressor 7B
BCOR	BCL6 corepressor
BDKRB2	bradykinin receptor B2
BEAN1	brain expressed, associated with NEDD4, 1
BEND3	BEN domain containing 3
BEND5	BEN domain containing 5
BEND6	BEN domain containing 6
BEST1	bestrophin 1
BEX2	brain expressed X-linked 2
BHLHB9	basic helix-loop-helix domain containing, class B, 9
BICD1	BICD cargo adaptor 1
BIK	BCL2 interacting killer
BLOC1S3	biogenesis of lysosomal organelles complex 1 subunit 3
BMF	Bcl2 modifying factor
BMP3	bone morphogenetic protein 3
BMP6	bone morphogenetic protein 6
BMPR1B	bone morphogenetic protein receptor type 1B
BNIP1	BCL2 interacting protein 1
BOD1	biorientation of chromosomes in cell division 1
BOK-AS1	BOK antisense RNA 1
BORCS5	BLOC-1 related complex subunit 5
BORCS6	BLOC-1 related complex subunit 6
BRD2	bromodomain containing 2
BRD8	bromodomain containing 8
BRMS1L	breast cancer metastasis-suppressor 1-like
BSPRY	B-box and SPRY domain containing
BTBD10	BTB domain containing 10
BTBD11	BTB domain containing 11
BTG2	BTG anti-proliferation factor 2
BTN2A2	butyrophilin subfamily 2 member A2
BTN3A2	butyrophilin subfamily 3 member A2
C10orf111	chromosome 10 open reading frame 111
C10orf67	chromosome 10 open reading frame 67
C11orf96	chromosome 11 open reading frame 96
C12orf43	chromosome 12 open reading frame 43
C15orf39	chromosome 15 open reading frame 39
C16orf46	chromosome 16 open reading frame 46
C16orf87	chromosome 16 open reading frame 87
C17orf80	chromosome 17 open reading frame 80
C19orf12	chromosome 19 open reading frame 12
C1GALT1	core 1 synthase, glycoprotein-N-acetylgalactosamine 3-beta-galactosyltransferase 1
C1orf112	chromosome 1 open reading frame 112
C1orf115	chromosome 1 open reading frame 115
C1R	complement C1r
C20orf27	chromosome 20 open reading frame 27
C22orf23	chromosome 22 open reading frame 23
C22orf46	chromosome 22 open reading frame 46
C3orf52	chromosome 3 open reading frame 52
C5orf56	chromosome 5 open reading frame 56
C6orf141	chromosome 6 open reading frame 141
C6orf48	chromosome 6 open reading frame 48
C6orf52	chromosome 6 open reading frame 52
C8orf31	chromosome 8 open reading frame 31
C9orf69	chromosome 9 open reading frame 69
C9orf72	chromosome 9 open reading frame 72
CA11	carbonic anhydrase 11
CA13	carbonic anhydrase 13
CA14	carbonic anhydrase 14
CA2	carbonic anhydrase 2
CA8	carbonic anhydrase 8
CABLES1	Cdk5 and Abl enzyme substrate 1
CABLES2	Cdk5 and Abl enzyme substrate 2
CABP1	calcium binding protein 1
CACNA1C	calcium voltage-gated channel subunit alpha1 C
CACNA1G	calcium voltage-gated channel subunit alpha1 G
CACNA2D3	calcium voltage-gated channel auxiliary subunit alpha2delta 3
CACNB4	calcium voltage-gated channel auxiliary subunit beta 4
CADM1	cell adhesion molecule 1
CADPS2	calcium dependent secretion activator 2
CALCB	calcitonin related polypeptide beta
CALM1	calmodulin 1
CALM3	calmodulin 3
CALY	calcyon neuron specific vesicular protein
CAMK2N1	calcium/calmodulin dependent protein kinase II inhibitor 1
CAPG	capping actin protein, gelsolin like
CAPN2	calpain 2
CARS	cysteinyl-tRNA synthetase
CASC10	cancer susceptibility candidate 10
CASP3	caspase 3
CASP8AP2	caspase 8 associated protein 2
CASQ1	calsequestrin 1
CAT	catalase
CAV2	caveolin 2
CBX2	chromobox 2
CC2D2A	coiled-coil and C2 domain containing 2A
CCAR2	cell cycle and apoptosis regulator 2
CCDC117	coiled-coil domain containing 117
CCDC121	coiled-coil domain containing 121
CCDC157	coiled-coil domain containing 157
CCDC160	coiled-coil domain containing 160
CCDC171	coiled-coil domain containing 171
CCDC174	coiled-coil domain containing 174
CCDC50	coiled-coil domain containing 50
CCDC61	coiled-coil domain containing 61
CCDC68	coiled-coil domain containing 68
CCDC8	coiled-coil domain containing 8
CCDC85C	coiled-coil domain containing 85C
CCDC91	coiled-coil domain containing 91
CCDC97	coiled-coil domain containing 97
CCL27	C-C motif chemokine ligand 27
CCNA2	cyclin A2
CCNB1IP1	cyclin B1 interacting protein 1
CCND1	cyclin D1
CCND2	cyclin D2
CCNE1	cyclin E1
CCNF	cyclin F
CCNG2	cyclin G2
CCNJ	cyclin J
CD274	CD274 molecule
CD2BP2	CD2 cytoplasmic tail binding protein 2
CD47	CD47 molecule
CD59	CD59 molecule
CD68	CD68 molecule
CD83	CD83 molecule
CD8A	CD8a molecule
CDC14A	cell division cycle 14A
CDC20	cell division cycle 20
CDC25A	cell division cycle 25A
CDC42BPG	CDC42 binding protein kinase gamma
CDC42EP3	CDC42 effector protein 3
CDC42SE1	CDC42 small effector 1
CDC7	cell division cycle 7
CDCA2	cell division cycle associated 2
CDCA4	cell division cycle associated 4
CDCA7L	cell division cycle associated 7 like
CDH1	cadherin 1
CDHR2	cadherin related family member 2
CDK17	cyclin dependent kinase 17
CDK5RAP2	CDK5 regulatory subunit associated protein 2
CDKAL1	CDK5 regulatory subunit associated protein 1 like 1
CDKN1A	cyclin dependent kinase inhibitor 1A
CDRT4	CMT1A duplicated region transcript 4
CDSN	corneodesmosin
CDYL	chromodomain Y-like
CEBPG	CCAAT/enhancer binding protein gamma
CELA2A	chymotrypsin like elastase family member 2A
CEMIP	cell migration inducing hyaluronan binding protein
CENPA	centromere protein A
CENPBD1	CENPB DNA-binding domain containing 1
CENPE	centromere protein E
CENPI	centromere protein I
CENPJ	centromere protein J
CEP250	centrosomal protein 250
CEP57	centrosomal protein 57
CEP70	centrosomal protein 70
CEP76	centrosomal protein 76
CEP85L	centrosomal protein 85 like
CEP89	centrosomal protein 89
CERK	ceramide kinase
CES2	carboxylesterase 2
CFAP52	cilia and flagella associated protein 52
CFAP57	cilia and flagella associated protein 57
CFAP58	cilia and flagella associated protein 58
CGN	cingulin
CGRRF1	cell growth regulator with ring finger domain 1
CHAC1	ChaC glutathione specific gamma-glutamylcyclotransferase 1
CHAF1B	chromatin assembly factor 1 subunit B
CHAMP1	chromosome alignment maintaining phosphoprotein 1
CHD5	chromodomain helicase DNA binding protein 5
CHGB	chromogranin B
CHMP3	charged multivesicular body protein 3
CHMP6	charged multivesicular body protein 6
CHRDL2	chordin like 2
CHRNB4	cholinergic receptor nicotinic beta 4 subunit
CHST1	carbohydrate sulfotransferase 1
CHST10	carbohydrate sulfotransferase 10
CHST11	carbohydrate sulfotransferase 11
CHTF8	chromosome transmission fidelity factor 8
CHURC1	churchill domain containing 1
CITED2	Cbp/p300 interacting transactivator with Glu/Asp rich carboxy-terminal domain 2
CKAP2	cytoskeleton associated protein 2
CKLF	chemokine like factor
CLCNKB	chloride voltage-gated channel Kb
CLDN4	claudin 4
CLDND1	claudin domain containing 1
CLIC1	chloride intracellular channel 1
CLN5	ceroid-lipofuscinosis, neuronal 5
CLP1	cleavage and polyadenylation factor I subunit 1
CLSTN3	calsyntenin 3
CLU	clusterin
CMBL	carboxymethylenebutenolidase homolog
CNIH4	cornichon family AMPA receptor auxiliary protein 4
CNN1	calponin 1
CNOT4	CCR4-NOT transcription complex subunit 4
CNP	2',3'-cyclic nucleotide 3' phosphodiesterase
CNTN1	contactin 1
CNTNAP3	contactin associated protein-like 3
COBLL1	cordon-bleu WH2 repeat protein like 1
COG3	component of oligomeric golgi complex 3
COL12A1	collagen type XII alpha 1 chain
COL6A2	collagen type VI alpha 2 chain
COPS8	COP9 signalosome subunit 8
COQ10B	coenzyme Q10B
COQ8A	coenzyme Q8A
CORO2B	coronin 2B
CPA5	carboxypeptidase A5
CPEB1	cytoplasmic polyadenylation element binding protein 1
CPEB2	cytoplasmic polyadenylation element binding protein 2
CPLX2	complexin 2
CPNE1	copine 1
CPNE2	copine 2
CPNE5	copine 5
CPOX	coproporphyrinogen oxidase
CPPED1	calcineurin like phosphoesterase domain containing 1
CPSF7	cleavage and polyadenylation specific factor 7
CR2	complement C3d receptor 2
CREB5	cAMP responsive element binding protein 5
CREBRF	CREB3 regulatory factor
CRHR2	corticotropin releasing hormone receptor 2
CRLF1	cytokine receptor like factor 1
CRLF3	cytokine receptor like factor 3
CRNDE	colorectal neoplasia differentially expressed (non-protein coding)
CRY1	cryptochrome circadian clock 1
CSDC2	cold shock domain containing C2
CSGALNACT2	chondroitin sulfate N-acetylgalactosaminyltransferase 2
CSNK1G1	casein kinase 1 gamma 1
CSPG4	chondroitin sulfate proteoglycan 4
CSRNP1	cysteine and serine rich nuclear protein 1
CSRNP2	cysteine and serine rich nuclear protein 2
CSRP1	cysteine and glycine rich protein 1
CSRP2	cysteine and glycine rich protein 2
CSTF2	cleavage stimulation factor subunit 2
CTAGE5	CTAGE family member 5, ER export factor
CTBP1-AS2	CTBP1 antisense RNA 2 (head to head)
CTGF	connective tissue growth factor
CTH	cystathionine gamma-lyase
CTNNAL1	catenin alpha like 1
CTNNBIP1	catenin beta interacting protein 1
CTR9	CTR9 homolog, Paf1/RNA polymerase II complex component
CTSD	cathepsin D
CTTNBP2	cortactin binding protein 2
CUL1	cullin 1
CUL4A	cullin 4A
CUZD1	CUB and zona pellucida like domains 1
CXCL6	C-X-C motif chemokine ligand 6
CXorf40B	chromosome X open reading frame 40B
CXXC4	CXXC finger protein 4
CYB561	cytochrome b561
CYB561A3	cytochrome b561 family member A3
CYB5D2	cytochrome b5 domain containing 2
CYGB	cytoglobin
CYP1A1	cytochrome P450 family 1 subfamily A member 1
CYP20A1	cytochrome P450 family 20 subfamily A member 1
CYP24A1	cytochrome P450 family 24 subfamily A member 1
CYP2U1	cytochrome P450 family 2 subfamily U member 1
CYR61	cysteine rich angiogenic inducer 61
CYTH1	cytohesin 1
CYTOR	cytoskeleton regulator RNA
DACH1	dachshund family transcription factor 1
DAG1	dystroglycan 1
DAPK1	death associated protein kinase 1
DARS2	aspartyl-tRNA synthetase 2, mitochondrial
DBNL	drebrin like
DCAF4	DDB1 and CUL4 associated factor 4
DCAF6	DDB1 and CUL4 associated factor 6
DCK	deoxycytidine kinase
DCLRE1B	DNA cross-link repair 1B
DCLRE1C	DNA cross-link repair 1C
DCTD	dCMP deaminase
DCTN2	dynactin subunit 2
DCUN1D2	defective in cullin neddylation 1 domain containing 2
DCUN1D3	defective in cullin neddylation 1 domain containing 3
DDIT4	DNA damage inducible transcript 4
DDIT4L	DNA damage inducible transcript 4 like
DDX23	DEAD-box helicase 23
DDX42	DEAD-box helicase 42
DDX60L	DEAD-box helicase 60-like
DEPDC1B	DEP domain containing 1B
DEPDC5	DEP domain containing 5
DEPTOR	DEP domain containing MTOR-interacting protein
DERL1	derlin 1
DESI2	desumoylating isopeptidase 2
DFFB	DNA fragmentation factor subunit beta
DGKA	diacylglycerol kinase alpha
DHCR24	24-dehydrocholesterol reductase
DHCR7	7-dehydrocholesterol reductase
DHDDS	dehydrodolichyl diphosphate synthase subunit
DHDH	dihydrodiol dehydrogenase
DHFR	dihydrofolate reductase
DHRS4-AS1	DHRS4 antisense RNA 1
DHRSX	dehydrogenase/reductase X-linked
DHX37	DEAH-box helicase 37
DHX57	DExH-box helicase 57
DIRC2	disrupted in renal carcinoma 2
DISP3	dispatched RND transporter family member 3
DLAT	dihydrolipoamide S-acetyltransferase
DLG2	discs large MAGUK scaffold protein 2
DLG4	discs large MAGUK scaffold protein 4
DLGAP1	DLG associated protein 1
DLGAP2	DLG associated protein 2
DLGAP5	DLG associated protein 5
DLL4	delta like canonical Notch ligand 4
DLST	dihydrolipoamide S-succinyltransferase
DLX3	distal-less homeobox 3
DNA2	DNA replication helicase/nuclease 2
DNAH14	dynein axonemal heavy chain 14
DNAH2	dynein axonemal heavy chain 2
DNAJA1	DnaJ heat shock protein family (Hsp40) member A1
DNAJB1	DnaJ heat shock protein family (Hsp40) member B1
DNAJB5	DnaJ heat shock protein family (Hsp40) member B5
DNAJC1	DnaJ heat shock protein family (Hsp40) member C1
DNAJC12	DnaJ heat shock protein family (Hsp40) member C12
DNAJC16	DnaJ heat shock protein family (Hsp40) member C16
DNAJC21	DnaJ heat shock protein family (Hsp40) member C21
DNAJC5	DnaJ heat shock protein family (Hsp40) member C5
DOLK	dolichol kinase
DOPEY1	dopey family member 1
DPF1	double PHD fingers 1
DPF3	double PHD fingers 3
DPH2	DPH2 homolog
DRAM1	DNA damage regulated autophagy modulator 1
DRG1	developmentally regulated GTP binding protein 1
DSCC1	DNA replication and sister chromatid cohesion 1
DTL	denticleless E3 ubiquitin protein ligase homolog
DTNA	dystrobrevin alpha
DTNBP1	dystrobrevin binding protein 1
DUSP1	dual specificity phosphatase 1
DUSP10	dual specificity phosphatase 10
DUSP26	dual specificity phosphatase 26 (putative)
DUSP3	dual specificity phosphatase 3
DUSP5	dual specificity phosphatase 5
DUSP8	dual specificity phosphatase 8
DUSP9	dual specificity phosphatase 9
DYNLL2	dynein light chain LC8-type 2
DYX1C1-CCPG1	DYX1C1-CCPG1 readthrough (NMD candidate)
E2F8	E2F transcription factor 8
EARS2	glutamyl-tRNA synthetase 2, mitochondrial
EBF2	early B-cell factor 2
EBF4	early B-cell factor 4
ECI2	enoyl-CoA delta isomerase 2
EDA	ectodysplasin A
EFCAB6	EF-hand calcium binding domain 6
EFNA1	ephrin A1
EFNB2	ephrin B2
EFTUD2	elongation factor Tu GTP binding domain containing 2
EGLN1	egl-9 family hypoxia inducible factor 1
EHBP1L1	EH domain binding protein 1 like 1
EHHADH	enoyl-CoA hydratase and 3-hydroxyacyl CoA dehydrogenase
EI24	EI24, autophagy associated transmembrane protein
EIF1	eukaryotic translation initiation factor 1
EIF1B	eukaryotic translation initiation factor 1B
EIF2AK1	eukaryotic translation initiation factor 2 alpha kinase 1
EIF2B5	eukaryotic translation initiation factor 2B subunit epsilon
EIF2S2	eukaryotic translation initiation factor 2 subunit beta
EIF4EBP1	eukaryotic translation initiation factor 4E binding protein 1
EIF4G2	eukaryotic translation initiation factor 4 gamma 2
ELAC1	elaC ribonuclease Z 1
ELF1	E74 like ETS transcription factor 1
ELK4	ELK4, ETS transcription factor
EMC10	ER membrane protein complex subunit 10
EMG1	EMG1, N1-specific pseudouridine methyltransferase
EMILIN2	elastin microfibril interfacer 2
EML2	echinoderm microtubule associated protein like 2
EML6	echinoderm microtubule associated protein like 6
EMP3	epithelial membrane protein 3
EMSY	EMSY, BRCA2 interacting transcriptional repressor
EN2	engrailed homeobox 2
ENDOU	endonuclease, poly(U) specific
ENO1-IT1	ENO1 intronic transcript 1
ENO2	enolase 2
ENOX1	ecto-NOX disulfide-thiol exchanger 1
ENTPD4	ectonucleoside triphosphate diphosphohydrolase 4
EPB41L1	erythrocyte membrane protein band 4.1 like 1
EPC2	enhancer of polycomb homolog 2
EPDR1	ependymin related 1
EPHA4	EPH receptor A4
EPHA7	EPH receptor A7
EPHA8	EPH receptor A8
ERC1	ELKS/RAB6-interacting/CAST family member 1
ERCC6L	ERCC excision repair 6 like, spindle assembly checkpoint helicase
ERCC8	ERCC excision repair 8, CSA ubiquitin ligase complex subunit
ERGIC1	endoplasmic reticulum-golgi intermediate compartment 1
ERI3	ERI1 exoribonuclease family member 3
ERICH1	glutamate rich 1
ERLIN2	ER lipid raft associated 2
ERMAP	erythroblast membrane associated protein (Scianna blood group)
ERRFI1	ERBB receptor feedback inhibitor 1
ESM1	endothelial cell specific molecule 1
ESPL1	extra spindle pole bodies like 1, separase
ESRRB	estrogen related receptor beta
ETFA	electron transfer flavoprotein alpha subunit
ETFDH	electron transfer flavoprotein dehydrogenase
ETV1	ETS variant 1
ETV5	ETS variant 5
EWSAT1	Ewing sarcoma associated transcript 1
EXOC3-AS1	EXOC3 antisense RNA 1
EXOC7	exocyst complex component 7
EXPH5	exophilin 5
EXT1	exostosin glycosyltransferase 1
EXTL1	exostosin like glycosyltransferase 1
F2R	coagulation factor II thrombin receptor
F8	coagulation factor VIII
FA2H	fatty acid 2-hydroxylase
FAAH2	fatty acid amide hydrolase 2
FADS1	fatty acid desaturase 1
FAF1	Fas associated factor 1
FAM110B	family with sequence similarity 110 member B
FAM117B	family with sequence similarity 117 member B
FAM120AOS	family with sequence similarity 120A opposite strand
FAM127C	family with sequence similarity 127 member C
FAM129A	family with sequence similarity 129 member A
FAM131B	family with sequence similarity 131 member B
FAM131C	family with sequence similarity 131 member C
FAM134A	family with sequence similarity 134 member A
FAM134C	family with sequence similarity 134 member C
FAM160B1	family with sequence similarity 160 member B1
FAM163B	family with sequence similarity 163 member B
FAM167A-AS1	FAM167A antisense RNA 1
FAM182B	family with sequence similarity 182 member B
FAM188A	family with sequence similarity 188 member A
FAM196A	family with sequence similarity 196 member A
FAM200A	family with sequence similarity 200 member A
FAM204A	family with sequence similarity 204 member A
FAM214A	family with sequence similarity 214 member A
FAM217B	family with sequence similarity 217 member B
FAM219A	family with sequence similarity 219 member A
FAM222A	family with sequence similarity 222 member A
FAM46A	family with sequence similarity 46 member A
FAM46C	family with sequence similarity 46 member C
FAM47E	family with sequence similarity 47 member E
FAM57A	family with sequence similarity 57 member A
FAM81A	family with sequence similarity 81 member A
FAM83D	family with sequence similarity 83 member D
FAM83H	family with sequence similarity 83 member H
FASTKD2	FAST kinase domains 2
FBN3	fibrillin 3
FBXL3	F-box and leucine rich repeat protein 3
FBXL5	F-box and leucine rich repeat protein 5
FBXO32	F-box protein 32
FBXO33	F-box protein 33
FBXO36	F-box protein 36
FBXW7	F-box and WD repeat domain containing 7
FCGBP	Fc fragment of IgG binding protein
FCGR1A	Fc fragment of IgG receptor Ia
FCMR	Fc fragment of IgM receptor
FDFT1	farnesyl-diphosphate farnesyltransferase 1
FECH	ferrochelatase
FEN1	flap structure-specific endonuclease 1
FEZ1	fasciculation and elongation protein zeta 1
FGF12-AS2	FGF12 antisense RNA 2
FGF18	fibroblast growth factor 18
FGF19	fibroblast growth factor 19
FGF5	fibroblast growth factor 5
FGF9	fibroblast growth factor 9
FGFR2	fibroblast growth factor receptor 2
FHL1	four and a half LIM domains 1
FHL2	four and a half LIM domains 2
FIBCD1	fibrinogen C domain containing 1
FIBIN	fin bud initiation factor homolog (zebrafish)
FILIP1	filamin A interacting protein 1
FKBP1B	FK506 binding protein 1B
FLOT2	flotillin 2
FLVCR1-AS1	FLVCR1 antisense RNA 1 (head to head)
FMN2	formin 2
FMNL3	formin like 3
FNBP4	formin binding protein 4
FNDC4	fibronectin type III domain containing 4
FNDC5	fibronectin type III domain containing 5
FOSL2	FOS like 2, AP-1 transcription factor subunit
FOXB2	forkhead box B2
FOXM1	forkhead box M1
FOXO4	forkhead box O4
FOXP1	forkhead box P1
FOXRED2	FAD dependent oxidoreductase domain containing 2
FRAT2	frequently rearranged in advanced T-cell lymphomas 2
FREM1	FRAS1 related extracellular matrix 1
FRMD5	FERM domain containing 5
FRMPD4	FERM and PDZ domain containing 4
FSCN1	fascin actin-bundling protein 1
FST	follistatin
FSTL3	follistatin like 3
FSTL4	follistatin like 4
FTCD	formimidoyltransferase cyclodeaminase
FUT1	fucosyltransferase 1 (H blood group)
FUT4	fucosyltransferase 4
FXN	frataxin
FXR1	FMR1 autosomal homolog 1
FYN	FYN proto-oncogene, Src family tyrosine kinase
FZD1	frizzled class receptor 1
G3BP1	G3BP stress granule assembly factor 1
GAB3	GRB2 associated binding protein 3
GABARAPL1	GABA type A receptor associated protein like 1
GABRB3	gamma-aminobutyric acid type A receptor beta3 subunit
GABRR2	gamma-aminobutyric acid type A receptor rho2 subunit
GAD1	glutamate decarboxylase 1
GADD45A	growth arrest and DNA damage inducible alpha
GADD45B	growth arrest and DNA damage inducible beta
GADL1	glutamate decarboxylase like 1
GALNT11	polypeptide N-acetylgalactosaminyltransferase 11
GALNT3	polypeptide N-acetylgalactosaminyltransferase 3
GAS2L3	growth arrest specific 2 like 3
GAS5	growth arrest specific 5 (non-protein coding)
GATAD1	GATA zinc finger domain containing 1
GATM	glycine amidinotransferase
GBA	glucosylceramidase beta
GBAS	glioblastoma amplified sequence
GCH1	GTP cyclohydrolase 1
GCNT1	glucosaminyl (N-acetyl) transferase 1, core 2
GDAP1	ganglioside induced differentiation associated protein 1
GDAP1L1	ganglioside induced differentiation associated protein 1 like 1
GDF11	growth differentiation factor 11
GDF15	growth differentiation factor 15
GDNF	glial cell derived neurotrophic factor
GDPD2	glycerophosphodiester phosphodiesterase domain containing 2
GEM	GTP binding protein overexpressed in skeletal muscle
GEMIN4	gem nuclear organelle associated protein 4
GEMIN8	gem nuclear organelle associated protein 8
GFM2	G elongation factor mitochondrial 2
GFPT2	glutamine-fructose-6-phosphate transaminase 2
GGACT	gamma-glutamylamine cyclotransferase
GID8	GID complex subunit 8 homolog
GINM1	glycoprotein integral membrane 1
GINS1	GINS complex subunit 1
GJD3	gap junction protein delta 3
GKAP1	G kinase anchoring protein 1
GLDC	glycine decarboxylase
GLIS1	GLIS family zinc finger 1
GLTSCR1L	GLTSCR1 like
GLUL	glutamate-ammonia ligase
GLYR1	glyoxylate reductase 1 homolog
GM2A	GM2 ganglioside activator
GMEB1	glucocorticoid modulatory element binding protein 1
GNA12	G protein subunit alpha 12
GNAI1	G protein subunit alpha i1
GNL1	G protein nucleolar 1 (putative)
GNPAT	glyceronephosphate O-acyltransferase
GNPDA1	glucosamine-6-phosphate deaminase 1
GOLGA2	golgin A2
GOLGA3	golgin A3
GOLGA6L10	golgin A6 family-like 10
GOLPH3L	golgi phosphoprotein 3 like
GOSR2	golgi SNAP receptor complex member 2
GOT2	glutamic-oxaloacetic transaminase 2
GPAT3	glycerol-3-phosphate acyltransferase 3
GPATCH2L	G-patch domain containing 2 like
GPBP1	GC-rich promoter binding protein 1
GPC2	glypican 2
GPI	glucose-6-phosphate isomerase
GPLD1	glycosylphosphatidylinositol specific phospholipase D1
GPN2	GPN-loop GTPase 2
GPR146	G protein-coupled receptor 146
GPR3	G protein-coupled receptor 3
GPR78	G protein-coupled receptor 78
GPRASP2	G protein-coupled receptor associated sorting protein 2
GPRC5A	G protein-coupled receptor class C group 5 member A
GPRC5B	G protein-coupled receptor class C group 5 member B
GPT2	glutamic--pyruvic transaminase 2
GRAMD1C	GRAM domain containing 1C
GRB10	growth factor receptor bound protein 10
GRIK3	glutamate ionotropic receptor kainate type subunit 3
GRIN1	glutamate ionotropic receptor NMDA type subunit 1
GRM4	glutamate metabotropic receptor 4
GRPEL2	GrpE like 2, mitochondrial
GRPEL2-AS1	GRPEL2 antisense RNA 1
GSK3A	glycogen synthase kinase 3 alpha
GTF2E2	general transcription factor IIE subunit 2
GTF2H2	general transcription factor IIH subunit 2
GTPBP2	GTP binding protein 2
GUCD1	guanylyl cyclase domain containing 1
GUCY1A3	guanylate cyclase 1 soluble subunit alpha
GUCY1B3	guanylate cyclase 1 soluble subunit beta
GUSBP4	glucuronidase, beta pseudogene 4
GYS1	glycogen synthase 1
GZF1	GDNF inducible zinc finger protein 1
H2AFY2	H2A histone family member Y2
HACE1	HECT domain and ankyrin repeat containing E3 ubiquitin protein ligase 1
HADH	hydroxyacyl-CoA dehydrogenase
HAND2	heart and neural crest derivatives expressed 2
HAPLN3	hyaluronan and proteoglycan link protein 3
HAS3	hyaluronan synthase 3
HAUS6	HAUS augmin like complex subunit 6
HBEGF	heparin binding EGF like growth factor
HBP1	HMG-box transcription factor 1
HCFC2	host cell factor C2
HCG15	HLA complex group 15 (non-protein coding)
HCN4	hyperpolarization activated cyclic nucleotide gated potassium channel 4
HCP5	HLA complex P5 (non-protein coding)
HDAC1	histone deacetylase 1
HECTD3	HECT domain E3 ubiquitin protein ligase 3
HECW1	HECT, C2 and WW domain containing E3 ubiquitin protein ligase 1
HERC4	HECT and RLD domain containing E3 ubiquitin protein ligase 4
HERPUD1	homocysteine inducible ER protein with ubiquitin like domain 1
HES2	hes family bHLH transcription factor 2
HEXB	hexosaminidase subunit beta
HEY2	hes related family bHLH transcription factor with YRPW motif 2
HGH1	HGH1 homolog
HHIP	hedgehog interacting protein
HIC1	HIC ZBTB transcriptional repressor 1
HIF1AN	hypoxia inducible factor 1 alpha subunit inhibitor
HIRA	histone cell cycle regulator
HIST1H2BJ	histone cluster 1 H2B family member j
HIST1H4K	histone cluster 1 H4 family member k
HIST2H2BA	histone cluster 2 H2B family member a (pseudogene)
HIST2H2BE	histone cluster 2 H2B family member e
HIST2H4A	histone cluster 2 H4 family member a
HLA-E	major histocompatibility complex, class I, E
HLF	HLF, PAR bZIP transcription factor
HMBOX1	homeobox containing 1
HMGA1	high mobility group AT-hook 1
HMGCR	3-hydroxy-3-methylglutaryl-CoA reductase
HMGCS1	3-hydroxy-3-methylglutaryl-CoA synthase 1
HMGXB4	HMG-box containing 4
HMMR	hyaluronan mediated motility receptor
HMOX1	heme oxygenase 1
HMSD	histocompatibility minor serpin domain containing
HNRNPA0	heterogeneous nuclear ribonucleoprotein A0
HNRNPM	heterogeneous nuclear ribonucleoprotein M
HNRNPUL2	heterogeneous nuclear ribonucleoprotein U like 2
HOMER2	homer scaffolding protein 2
HOXB13	homeobox B13
HOXD12	homeobox D12
HPS6	HPS6, biogenesis of lysosomal organelles complex 2 subunit 3
HPSE	heparanase
HR	hair growth associated
HS6ST2	heparan sulfate 6-O-sulfotransferase 2
HSD17B14	hydroxysteroid 17-beta dehydrogenase 14
HSD17B7	hydroxysteroid 17-beta dehydrogenase 7
HSDL2	hydroxysteroid dehydrogenase like 2
HSF2	heat shock transcription factor 2
HSPA14	heat shock protein family A (Hsp70) member 14
HSPA9	heat shock protein family A (Hsp70) member 9
HYAL2	hyaluronoglucosaminidase 2
IARS2	isoleucyl-tRNA synthetase 2, mitochondrial
IBA57	IBA57 homolog, iron-sulfur cluster assembly
ICA1L	islet cell autoantigen 1 like
ID3	inhibitor of DNA binding 3, HLH protein
IDH1	isocitrate dehydrogenase (NADP(+)) 1, cytosolic
IDI1	isopentenyl-diphosphate delta isomerase 1
IFNAR2	interferon alpha and beta receptor subunit 2
IFNGR1	interferon gamma receptor 1
IFRD1	interferon related developmental regulator 1
IFT22	intraflagellar transport 22
IGF2	insulin like growth factor 2
IGFBP5	insulin like growth factor binding protein 5
IL10RA	interleukin 10 receptor subunit alpha
IL11	interleukin 11
IL12A	interleukin 12A
IL15RA	interleukin 15 receptor subunit alpha
IL17B	interleukin 17B
IL17D	interleukin 17D
INA	internexin neuronal intermediate filament protein alpha
ING3	inhibitor of growth family member 3
INHBA	inhibin beta A subunit
INHBC	inhibin beta C subunit
INMT-FAM188B	INMT-FAM188B readthrough (NMD candidate)
INPP1	inositol polyphosphate-1-phosphatase
INPP5F	inositol polyphosphate-5-phosphatase F
INPP5K	inositol polyphosphate-5-phosphatase K
INSIG1	insulin induced gene 1
INTS3	integrator complex subunit 3
INTS4	integrator complex subunit 4
INTS5	integrator complex subunit 5
INTU	inturned planar cell polarity protein
IPO13	importin 13
IPO4	importin 4
IQCE	IQ motif containing E
IQCJ-SCHIP1-AS1	IQCJ-SCHIP1 readthrough antisense RNA 1
IQGAP2	IQ motif containing GTPase activating protein 2
IQGAP3	IQ motif containing GTPase activating protein 3
IRF2BP2	interferon regulatory factor 2 binding protein 2
IRGQ	immunity related GTPase Q
ISG20	interferon stimulated exonuclease gene 20
ISG20L2	interferon stimulated exonuclease gene 20 like 2
ISM1	isthmin 1
IST1	IST1, ESCRT-III associated factor
ITGA3	integrin subunit alpha 3
ITGA5	integrin subunit alpha 5
ITGA7	integrin subunit alpha 7
ITGAD	integrin subunit alpha D
ITGB2	integrin subunit beta 2
ITGB3	integrin subunit beta 3
ITGB4	integrin subunit beta 4
ITIH5	inter-alpha-trypsin inhibitor heavy chain family member 5
IVD	isovaleryl-CoA dehydrogenase
IVNS1ABP	influenza virus NS1A binding protein
JAKMIP3	Janus kinase and microtubule interacting protein 3
JDP2	Jun dimerization protein 2
JMJD1C	jumonji domain containing 1C
JUN	Jun proto-oncogene, AP-1 transcription factor subunit
KAT14	lysine acetyltransferase 14
KAT6B	lysine acetyltransferase 6B
KATNA1	katanin catalytic subunit A1
KATNBL1	katanin regulatory subunit B1 like 1
KBTBD11	kelch repeat and BTB domain containing 11
KBTBD2	kelch repeat and BTB domain containing 2
KCNC3	potassium voltage-gated channel subfamily C member 3
KCNG3	potassium voltage-gated channel modifier subfamily G member 3
KCNH3	potassium voltage-gated channel subfamily H member 3
KCNJ12	potassium voltage-gated channel subfamily J member 12
KCNJ5	potassium voltage-gated channel subfamily J member 5
KCNJ8	potassium voltage-gated channel subfamily J member 8
KCNK15-AS1	KCNK15 antisense RNA 1 (head to head)
KCNK9	potassium two pore domain channel subfamily K member 9
KCNQ1OT1	KCNQ1 opposite strand/antisense transcript 1 (non-protein coding)
KCNQ5	potassium voltage-gated channel subfamily Q member 5
KCTD1	potassium channel tetramerization domain containing 1
KCTD12	potassium channel tetramerization domain containing 12
KCTD15	potassium channel tetramerization domain containing 15
KCTD2	potassium channel tetramerization domain containing 2
KCTD21	potassium channel tetramerization domain containing 21
KCTD3	potassium channel tetramerization domain containing 3
KDM1A	lysine demethylase 1A
KDM3A	lysine demethylase 3A
KDM6B	lysine demethylase 6B
KDM7A	lysine demethylase 7A
KDM8	lysine demethylase 8
KEAP1	kelch like ECH associated protein 1
KHDRBS3	KH RNA binding domain containing, signal transduction associated 3
KIAA0825	KIAA0825
KIAA0922	KIAA0922
KIF1BP	KIF1 binding protein
KIF23	kinesin family member 23
KIF24	kinesin family member 24
KIZ	kizuna centrosomal protein
KLF4	Kruppel like factor 4
KLF6	Kruppel like factor 6
KLF7	Kruppel like factor 7
KLHL10	kelch like family member 10
KLHL13	kelch like family member 13
KLHL14	kelch like family member 14
KLHL2	kelch like family member 2
KLHL42	kelch like family member 42
KLHL9	kelch like family member 9
KLK4	kallikrein related peptidase 4
KLLN	killin, p53-regulated DNA replication inhibitor
KMT2E	lysine methyltransferase 2E
KRBA2	KRAB-A domain containing 2
KREMEN1	kringle containing transmembrane protein 1
KRT75	keratin 75
L1CAM	L1 cell adhesion molecule
L3MBTL4	l(3)mbt-like 4 (Drosophila)
LACTB	lactamase beta
LAMA4	laminin subunit alpha 4
LAMB1	laminin subunit beta 1
LAMB2	laminin subunit beta 2
LAMC2	laminin subunit gamma 2
LAMP1	lysosomal associated membrane protein 1
LAMP3	lysosomal associated membrane protein 3
LAPTM4B	lysosomal protein transmembrane 4 beta
LARP6	La ribonucleoprotein domain family member 6
LASP1	LIM and SH3 protein 1
LBH	limb bud and heart development
LCORL	ligand dependent nuclear receptor corepressor like
LDB3	LIM domain binding 3
LDLR	low density lipoprotein receptor
LEMD2	LEM domain containing 2
LEPROT	leptin receptor overlapping transcript
LETM2	leucine zipper and EF-hand containing transmembrane protein 2
LGALSL	galectin like
LGI4	leucine rich repeat LGI family member 4
LGR5	leucine rich repeat containing G protein-coupled receptor 5
LGR6	leucine rich repeat containing G protein-coupled receptor 6
LHFPL4	lipoma HMGIC fusion partner-like 4
LHX1	LIM homeobox 1
LHX6	LIM homeobox 6
LINC00189	long intergenic non-protein coding RNA 189
LINC00242	long intergenic non-protein coding RNA 242
LINC00282	long intergenic non-protein coding RNA 282
LINC00337	long intergenic non-protein coding RNA 337
LINC00449	long intergenic non-protein coding RNA 449
LINC00574	long intergenic non-protein coding RNA 574
LINC00612	long intergenic non-protein coding RNA 612
LINC01411	long intergenic non-protein coding RNA 1411
LINC01465	long intergenic non-protein coding RNA 1465
LINC01547	long intergenic non-protein coding RNA 1547
LINC01551	long intergenic non-protein coding RNA 1551
LINC01556	long intergenic non-protein coding RNA 1556
LINS1	lines homolog 1
LIPT2	lipoyl(octanoyl) transferase 2 (putative)
LMAN2L	lectin, mannose binding 2 like
LMCD1	LIM and cysteine rich domains 1
LMNB1	lamin B1
LMO3	LIM domain only 3
LMO7	LIM domain 7
LONP1	lon peptidase 1, mitochondrial
LONRF3	LON peptidase N-terminal domain and ring finger 3
LPAR1	lysophosphatidic acid receptor 1
LPIN1	lipin 1
LRCH1	leucine rich repeats and calponin homology domain containing 1
LRCH2	leucine rich repeats and calponin homology domain containing 2
LRFN3	leucine rich repeat and fibronectin type III domain containing 3
LRP12	LDL receptor related protein 12
LRP8	LDL receptor related protein 8
LRRC20	leucine rich repeat containing 20
LRRC3	leucine rich repeat containing 3
LRRC4	leucine rich repeat containing 4
LRRC61	leucine rich repeat containing 61
LRRC75A	leucine rich repeat containing 75A
LRRC8D	leucine rich repeat containing 8 family member D
LRRFIP1	LRR binding FLII interacting protein 1
LRTOMT	leucine rich transmembrane and O-methyltransferase domain containing
LSS	lanosterol synthase (2,3-oxidosqualene-lanosterol cyclase)
LTBR	lymphotoxin beta receptor
LURAP1	leucine rich adaptor protein 1
LURAP1L	leucine rich adaptor protein 1 like
LY6E	lymphocyte antigen 6 complex, locus E
LYSMD1	LysM domain containing 1
LYSMD3	LysM domain containing 3
LYST	lysosomal trafficking regulator
LZTS1	leucine zipper tumor suppressor 1
MAFF	MAF bZIP transcription factor F
MAGEE1	MAGE family member E1
MAL2	mal, T-cell differentiation protein 2 (gene/pseudogene)
MAML2	mastermind like transcriptional coactivator 2
MANBA	mannosidase beta
MANEAL	mannosidase endo-alpha like
MAOA	monoamine oxidase A
MAP1A	microtubule associated protein 1A
MAP2K4	mitogen-activated protein kinase kinase 4
MAP2K5	mitogen-activated protein kinase kinase 5
MAP2K6	mitogen-activated protein kinase kinase 6
MAP4K3	mitogen-activated protein kinase kinase kinase kinase 3
MAP6	microtubule associated protein 6
MAP7	microtubule associated protein 7
MAP7D3	MAP7 domain containing 3
MAPK1IP1L	mitogen-activated protein kinase 1 interacting protein 1 like
MAPK7	mitogen-activated protein kinase 7
MAPKAPK5	mitogen-activated protein kinase-activated protein kinase 5
MAPRE2	microtubule associated protein RP/EB family member 2
MAPRE3	microtubule associated protein RP/EB family member 3
MARC1	mitochondrial amidoxime reducing component 1
MARCH5	membrane associated ring-CH-type finger 5
MARCH7	membrane associated ring-CH-type finger 7
MARCH8	membrane associated ring-CH-type finger 8
MARS	methionyl-tRNA synthetase
MARVELD1	MARVEL domain containing 1
MASTL	microtubule associated serine/threonine kinase like
MATK	megakaryocyte-associated tyrosine kinase
MBD6	methyl-CpG binding domain protein 6
MBLAC2	metallo-beta-lactamase domain containing 2
MBNL2	muscleblind like splicing regulator 2
MCAM	melanoma cell adhesion molecule
MCAT	malonyl-CoA-acyl carrier protein transacylase
MCF2L2	MCF.2 cell line derived transforming sequence-like 2
MCM3AP	minichromosome maintenance complex component 3 associated protein
MCM4	minichromosome maintenance complex component 4
MCM6	minichromosome maintenance complex component 6
MCOLN2	mucolipin 2
MDH2	malate dehydrogenase 2
MDM2	MDM2 proto-oncogene
ME1	malic enzyme 1
MED20	mediator complex subunit 20
MED29	mediator complex subunit 29
MELK	maternal embryonic leucine zipper kinase
MEPCE	methylphosphate capping enzyme
MERTK	MER proto-oncogene, tyrosine kinase
METRNL	meteorin like, glial cell differentiation regulator
METTL22	methyltransferase like 22
METTL7B	methyltransferase like 7B
METTL9	methyltransferase like 9
MFSD2A	major facilitator superfamily domain containing 2A
MFSD5	major facilitator superfamily domain containing 5
MGAT1	mannosyl (alpha-1,3-)-glycoprotein beta-1,2-N-acetylglucosaminyltransferase
MGLL	monoglyceride lipase
MIAT	myocardial infarction associated transcript (non-protein coding)
MICA	MHC class I polypeptide-related sequence A
MICB	MHC class I polypeptide-related sequence B
MIOS	meiosis regulator for oocyte development
MIPEP	mitochondrial intermediate peptidase
MIPOL1	mirror-image polydactyly 1
MIR1-1HG	MIR1-1 host gene
MIR3179-3	microRNA 3179-3
MIR3187	microRNA 3187
MIR31HG	MIR31 host gene
MKNK1	MAP kinase interacting serine/threonine kinase 1
MMAA	methylmalonic aciduria (cobalamin deficiency) cblA type
MMAB	methylmalonic aciduria (cobalamin deficiency) cblB type
MMACHC	methylmalonic aciduria (cobalamin deficiency) cblC type, with homocystinuria
MMD	monocyte to macrophage differentiation associated
MME	membrane metalloendopeptidase
MMP15	matrix metallopeptidase 15
MN1	MN1 proto-oncogene, transcriptional regulator
MOB3A	MOB kinase activator 3A
MOCOS	molybdenum cofactor sulfurase
MOCS3	molybdenum cofactor synthesis 3
MORC4	MORC family CW-type zinc finger 4
MORN1	MORN repeat containing 1
MORN3	MORN repeat containing 3
MOSPD1	motile sperm domain containing 1
MOXD1	monooxygenase DBH like 1
MRC2	mannose receptor C type 2
MRO	maestro
MRPL49	mitochondrial ribosomal protein L49
MSANTD3-TMEFF1	MSANTD3-TMEFF1 readthrough
MSANTD4	Myb/SANT DNA binding domain containing 4 with coiled-coils
MSC	musculin
MSH2	mutS homolog 2
MTCP1	mature T-cell proliferation 1
MTFP1	mitochondrial fission process 1
MTFR1	mitochondrial fission regulator 1
MTHFD1	methylenetetrahydrofolate dehydrogenase, cyclohydrolase and formyltetrahydrofolate synthetase 1
MTHFD2	methylenetetrahydrofolate dehydrogenase (NADP+ dependent) 2, methenyltetrahydrofolate cyclohydrolase
MTHFR	methylenetetrahydrofolate reductase
MTMR7	myotubularin related protein 7
MTRR	5-methyltetrahydrofolate-homocysteine methyltransferase reductase
MTURN	maturin, neural progenitor differentiation regulator homolog
MVB12B	multivesicular body subunit 12B
MXD1	MAX dimerization protein 1
MXD4	MAX dimerization protein 4
MXI1	MAX interactor 1, dimerization protein
MYADM	myeloid associated differentiation marker
MYB	MYB proto-oncogene, transcription factor
MYBL2	MYB proto-oncogene like 2
MYC	v-myc avian myelocytomatosis viral oncogene homolog
MYCNOS	MYCN opposite strand
MYD88	myeloid differentiation primary response 88
MYL12A	myosin light chain 12A
MYNN	myoneurin
MYO1B	myosin IB
MYO3A	myosin IIIA
MYOCD	myocardin
MYOF	myoferlin
MYOM2	myomesin 2
MYPN	myopalladin
MYT1	myelin transcription factor 1
NAA40	N(alpha)-acetyltransferase 40, NatD catalytic subunit
NAGA	alpha-N-acetylgalactosaminidase
NAIF1	nuclear apoptosis inducing factor 1
NAMPT	nicotinamide phosphoribosyltransferase
NAP1L3	nucleosome assembly protein 1 like 3
NARF	nuclear prelamin A recognition factor
NARS	asparaginyl-tRNA synthetase
NBPF1	neuroblastoma breakpoint family member 1
NCAPH	non-SMC condensin I complex subunit H
NCOA5	nuclear receptor coactivator 5
NDFIP1	Nedd4 family interacting protein 1
NDFIP2-AS1	NDFIP2 antisense RNA 1
NDNF	neuron derived neurotrophic factor
NDRG3	NDRG family member 3
NDRG4	NDRG family member 4
NDUFA10	NADH:ubiquinone oxidoreductase subunit A10
NDUFA4L2	NDUFA4, mitochondrial complex associated like 2
NDUFS2	NADH:ubiquinone oxidoreductase core subunit S2
NECAB1	N-terminal EF-hand calcium binding protein 1
NECAP2	NECAP endocytosis associated 2
NEDD1	neural precursor cell expressed, developmentally down-regulated 1
NEDD4L	neural precursor cell expressed, developmentally down-regulated 4-like, E3 ubiquitin protein ligase
NEFL	neurofilament, light polypeptide
NEFM	neurofilament, medium polypeptide
NEIL2	nei like DNA glycosylase 2
NEK4	NIMA related kinase 4
NEK8	NIMA related kinase 8
NELFCD	negative elongation factor complex member C/D
NES	nestin
NFE2L2	nuclear factor, erythroid 2 like 2
NFIA-AS1	NFIA antisense RNA 1
NFIL3	nuclear factor, interleukin 3 regulated
NFS1	NFS1, cysteine desulfurase
NGF	nerve growth factor
NGFR	nerve growth factor receptor
NHS	NHS actin remodeling regulator
NHSL1	NHS like 1
NID2	nidogen 2
NIPAL2	NIPA like domain containing 2
NIPAL4	NIPA like domain containing 4
NIPSNAP1	nipsnap homolog 1 (C. elegans)
NKX6-2	NK6 homeobox 2
NLGN1	neuroligin 1
NLRC5	NLR family CARD domain containing 5
NLRP14	NLR family pyrin domain containing 14
NMI	N-myc and STAT interactor
NOD2	nucleotide binding oligomerization domain containing 2
NOL4	nucleolar protein 4
NOL4L	nucleolar protein 4 like
NOL6	nucleolar protein 6
NOL9	nucleolar protein 9
NOTUM	NOTUM, palmitoleoyl-protein carboxylesterase
NOV	nephroblastoma overexpressed
NPB	neuropeptide B
NPEPPS	aminopeptidase puromycin sensitive
NPHP3	nephrocystin 3
NPPB	natriuretic peptide B
NPR1	natriuretic peptide receptor 1
NPTX1	neuronal pentraxin 1
NR2E1	nuclear receptor subfamily 2 group E member 1
NRDC	nardilysin convertase
NRF1	nuclear respiratory factor 1
NRL	neural retina leucine zipper
NRP1	neuropilin 1
NRXN3	neurexin 3
NSDHL	NAD(P) dependent steroid dehydrogenase-like
NT5DC2	5'-nucleotidase domain containing 2
NT5DC3	5'-nucleotidase domain containing 3
NTF3	neurotrophin 3
NTF4	neurotrophin 4
NUBPL	nucleotide binding protein like
NUCB1	nucleobindin 1
NUDCD3	NudC domain containing 3
NUDT19	nudix hydrolase 19
NUP214	nucleoporin 214
NUP50	nucleoporin 50
NXT2	nuclear transport factor 2 like export factor 2
NYNRIN	NYN domain and retroviral integrase containing
OAZ3	ornithine decarboxylase antizyme 3
OBSCN	obscurin, cytoskeletal calmodulin and titin-interacting RhoGEF
OCEL1	occludin/ELL domain containing 1
OGDH	oxoglutarate dehydrogenase
OGT	O-linked N-acetylglucosamine (GlcNAc) transferase
OLFM1	olfactomedin 1
OLFM2	olfactomedin 2
OLFML2A	olfactomedin like 2A
OLFML2B	olfactomedin like 2B
OLIG2	oligodendrocyte lineage transcription factor 2
OLMALINC	oligodendrocyte maturation-associated long intergenic non-coding RNA
ONECUT3	one cut homeobox 3
OPA3	optic atrophy 3 (autosomal recessive, with chorea and spastic paraplegia)
OPTN	optineurin
ORC2	origin recognition complex subunit 2
ORMDL1	ORMDL sphingolipid biosynthesis regulator 1
OS9	OS9, endoplasmic reticulum lectin
OSBPL2	oxysterol binding protein like 2
OSCAR	osteoclast associated, immunoglobulin-like receptor
OSER1	oxidative stress responsive serine rich 1
OSMR	oncostatin M receptor
OTP	orthopedia homeobox
OTUB2	OTU deubiquitinase, ubiquitin aldehyde binding 2
OTUD1	OTU deubiquitinase 1
OTX1	orthodenticle homeobox 1
OXGR1	oxoglutarate receptor 1
OXR1	oxidation resistance 1
OXSM	3-oxoacyl-ACP synthase, mitochondrial
P2RX5	purinergic receptor P2X 5
P4HA2	prolyl 4-hydroxylase subunit alpha 2
PADI2	peptidyl arginine deiminase 2
PALB2	partner and localizer of BRCA2
PALLD	palladin, cytoskeletal associated protein
PALM3	paralemmin 3
PAM	peptidylglycine alpha-amidating monooxygenase
PAPD4	poly(A) RNA polymerase D4, non-canonical
PARN	poly(A)-specific ribonuclease
PARP12	poly(ADP-ribose) polymerase family member 12
PARP2	poly(ADP-ribose) polymerase 2
PARS2	prolyl-tRNA synthetase 2, mitochondrial (putative)
PARVA	parvin alpha
PATZ1	POZ/BTB and AT hook containing zinc finger 1
PCBD2	pterin-4 alpha-carbinolamine dehydratase 2
PCBP3	poly(rC) binding protein 3
PCCA	propionyl-CoA carboxylase alpha subunit
PCDH7	protocadherin 7
PCDHGA1	protocadherin gamma subfamily A, 1
PCF11	PCF11 cleavage and polyadenylation factor subunit
PCGF1	polycomb group ring finger 1
PCID2	PCI domain containing 2
PCNT	pericentrin
PCNX2	pecanex homolog 2 (Drosophila)
PCTP	phosphatidylcholine transfer protein
PDCD5	programmed cell death 5
PDE1B	phosphodiesterase 1B
PDE2A	phosphodiesterase 2A
PDE3B	phosphodiesterase 3B
PDE5A	phosphodiesterase 5A
PDE7A	phosphodiesterase 7A
PDF	peptide deformylase (mitochondrial)
PDGFB	platelet derived growth factor subunit B
PDGFD	platelet derived growth factor D
PDIA4	protein disulfide isomerase family A member 4
PDK2	pyruvate dehydrogenase kinase 2
PDK4	pyruvate dehydrogenase kinase 4
PDLIM3	PDZ and LIM domain 3
PDP1	pyruvate dehyrogenase phosphatase catalytic subunit 1
PDPK1	3-phosphoinositide dependent protein kinase 1
PDZRN3-AS1	PDZRN3 antisense RNA 1
PEA15	phosphoprotein enriched in astrocytes 15
PELI1	pellino E3 ubiquitin protein ligase 1
PER1	period circadian clock 1
PEX13	peroxisomal biogenesis factor 13
PEX5L	peroxisomal biogenesis factor 5 like
PF4V1	platelet factor 4 variant 1
PFAS	phosphoribosylformylglycinamidine synthase
PFKM	phosphofructokinase, muscle
PGBD2	piggyBac transposable element derived 2
PHC1	polyhomeotic homolog 1
PHF10	PHD finger protein 10
PHF21B	PHD finger protein 21B
PHF23	PHD finger protein 23
PHKA1	phosphorylase kinase regulatory subunit alpha 1
PHLDA1	pleckstrin homology like domain family A member 1
PHLDA2	pleckstrin homology like domain family A member 2
PHYHIP	phytanoyl-CoA 2-hydroxylase interacting protein
PIAS2	protein inhibitor of activated STAT 2
PICALM	phosphatidylinositol binding clathrin assembly protein
PICK1	protein interacting with PRKCA 1
PIGA	phosphatidylinositol glycan anchor biosynthesis class A
PIGM	phosphatidylinositol glycan anchor biosynthesis class M
PIGV	phosphatidylinositol glycan anchor biosynthesis class V
PIK3CD	phosphatidylinositol-4,5-bisphosphate 3-kinase catalytic subunit delta
PIK3R1	phosphoinositide-3-kinase regulatory subunit 1
PIK3R4	phosphoinositide-3-kinase regulatory subunit 4
PIM1	Pim-1 proto-oncogene, serine/threonine kinase
PIP4K2B	phosphatidylinositol-5-phosphate 4-kinase type 2 beta
PIP5K1A	phosphatidylinositol-4-phosphate 5-kinase type 1 alpha
PIP5KL1	phosphatidylinositol-4-phosphate 5-kinase like 1
PIPOX	pipecolic acid and sarcosine oxidase
PITPNA	phosphatidylinositol transfer protein alpha
PITPNC1	phosphatidylinositol transfer protein, cytoplasmic 1
PKNOX1	PBX/knotted 1 homeobox 1
PLA2G10	phospholipase A2 group X
PLAG1	PLAG1 zinc finger
PLAGL1	PLAG1 like zinc finger 1
PLAU	plasminogen activator, urokinase
PLCB2	phospholipase C beta 2
PLCB4	phospholipase C beta 4
PLCE1	phospholipase C epsilon 1
PLCH2	phospholipase C eta 2
PLD4	phospholipase D family member 4
PLEKHA1	pleckstrin homology domain containing A1
PLEKHF2	pleckstrin homology and FYVE domain containing 2
PLEKHH2	pleckstrin homology, MyTH4 and FERM domain containing H2
PLK1	polo like kinase 1
PLK2	polo like kinase 2
PLPP3	phospholipid phosphatase 3
PLPP7	phospholipid phosphatase 7 (inactive)
PLRG1	pleiotropic regulator 1
PMAIP1	phorbol-12-myristate-13-acetate-induced protein 1
PMEPA1	prostate transmembrane protein, androgen induced 1
PMPCA	peptidase, mitochondrial processing alpha subunit
PMVK	phosphomevalonate kinase
PNMA1	paraneoplastic Ma antigen 1
PNPLA3	patatin like phospholipase domain containing 3
POC1B	POC1 centriolar protein B
PODXL	podocalyxin like
POFUT1	protein O-fucosyltransferase 1
POGZ	pogo transposable element with ZNF domain
POLDIP2	DNA polymerase delta interacting protein 2
POLG	DNA polymerase gamma, catalytic subunit
POLK	DNA polymerase kappa
POLR1D	RNA polymerase I subunit D
POLR1E	RNA polymerase I subunit E
POLR3B	RNA polymerase III subunit B
POLR3H	RNA polymerase III subunit H
POP1	POP1 homolog, ribonuclease P/MRP subunit
POU3F1	POU class 3 homeobox 1
POU3F2	POU class 3 homeobox 2
PPARG	peroxisome proliferator activated receptor gamma
PPEF1	protein phosphatase with EF-hand domain 1
PPFIA1	PTPRF interacting protein alpha 1
PPIF	peptidylprolyl isomerase F
PPL	periplakin
PPM1B	protein phosphatase, Mg2+/Mn2+ dependent 1B
PPM1D	protein phosphatase, Mg2+/Mn2+ dependent 1D
PPM1H	protein phosphatase, Mg2+/Mn2+ dependent 1H
PPM1J	protein phosphatase, Mg2+/Mn2+ dependent 1J
PPM1K	protein phosphatase, Mg2+/Mn2+ dependent 1K
PPP1R10	protein phosphatase 1 regulatory subunit 10
PPP1R15A	protein phosphatase 1 regulatory subunit 15A
PPP1R18	protein phosphatase 1 regulatory subunit 18
PPP1R3B	protein phosphatase 1 regulatory subunit 3B
PPP2R3C	protein phosphatase 2 regulatory subunit B''gamma
PPP2R5A	protein phosphatase 2 regulatory subunit B'alpha
PPP2R5D	protein phosphatase 2 regulatory subunit B'delta
PPP3CC	protein phosphatase 3 catalytic subunit gamma
PPP4R1	protein phosphatase 4 regulatory subunit 1
PPP4R4	protein phosphatase 4 regulatory subunit 4
PPTC7	PTC7 protein phosphatase homolog
PRC1	protein regulator of cytokinesis 1
PRCD	progressive rod-cone degeneration
PRDM11	PR/SET domain 11
PRDM5	PR/SET domain 5
PRDM6	PR/SET domain 6
PRDX3	peroxiredoxin 3
PREB	prolactin regulatory element binding
PREP	prolyl endopeptidase
PRIMA1	proline rich membrane anchor 1
PRKAA1	protein kinase AMP-activated catalytic subunit alpha 1
PRKAG2	protein kinase AMP-activated non-catalytic subunit gamma 2
PRKAR1B	protein kinase cAMP-dependent type I regulatory subunit beta
PRKAR2B	protein kinase cAMP-dependent type II regulatory subunit beta
PRKCQ	protein kinase C theta
PRKRA	protein activator of interferon induced protein kinase EIF2AK2
PRNP	prion protein
PROK2	prokineticin 2
PROSC	proline synthetase cotranscribed homolog (bacterial)
PRPF18	pre-mRNA processing factor 18
PRPF4	pre-mRNA processing factor 4
PRPS2	phosphoribosyl pyrophosphate synthetase 2
PRPSAP1	phosphoribosyl pyrophosphate synthetase associated protein 1
PRPSAP2	phosphoribosyl pyrophosphate synthetase associated protein 2
PRR26	proline rich 26
PRR34	proline rich 34
PRR35	proline rich 35
PRR4	proline rich 4 (lacrimal)
PRRT3	proline rich transmembrane protein 3
PRSS12	protease, serine 12
PRUNE2	prune homolog 2
PSD2	pleckstrin and Sec7 domain containing 2
PSD4	pleckstrin and Sec7 domain containing 4
PSG4	pregnancy specific beta-1-glycoprotein 4
PSKH1	protein serine kinase H1
PSTPIP2	proline-serine-threonine phosphatase interacting protein 2
PTBP2	polypyrimidine tract binding protein 2
PTGER2	prostaglandin E receptor 2
PTGER4	prostaglandin E receptor 4
PTGES	prostaglandin E synthase
PTGR2	prostaglandin reductase 2
PTHLH	parathyroid hormone like hormone
PTP4A3	protein tyrosine phosphatase type IVA, member 3
PTPDC1	protein tyrosine phosphatase domain containing 1
PTPN12	protein tyrosine phosphatase, non-receptor type 12
PTPN21	protein tyrosine phosphatase, non-receptor type 21
PTPRH	protein tyrosine phosphatase, receptor type H
PTPRM	protein tyrosine phosphatase, receptor type M
PTPRO	protein tyrosine phosphatase, receptor type O
PUDP	pseudouridine 5'-phosphatase
PUM3	pumilio RNA binding family member 3
PURA	purine rich element binding protein A
PVRL3-AS1	PVRL3 antisense RNA 1
PXDC1	PX domain containing 1
PYCRL	pyrroline-5-carboxylate reductase-like
PYY	peptide YY
QARS	glutaminyl-tRNA synthetase
QPRT	quinolinate phosphoribosyltransferase
QRFPR	pyroglutamylated RFamide peptide receptor
QSOX2	quiescin sulfhydryl oxidase 2
R3HCC1	R3H domain and coiled-coil containing 1
R3HDM2	R3H domain containing 2
RAB12	RAB12, member RAS oncogene family
RAB27A	RAB27A, member RAS oncogene family
RAB27B	RAB27B, member RAS oncogene family
RAB28	RAB28, member RAS oncogene family
RAB2B	RAB2B, member RAS oncogene family
RAB35	RAB35, member RAS oncogene family
RAB36	RAB36, member RAS oncogene family
RAB39B	RAB39B, member RAS oncogene family
RAB3D	RAB3D, member RAS oncogene family
RAB3GAP1	RAB3 GTPase activating protein catalytic subunit 1
RAB6A	RAB6A, member RAS oncogene family
RAB9A	RAB9A, member RAS oncogene family
RABGAP1L	RAB GTPase activating protein 1 like
RAD51B	RAD51 paralog B
RAD54L	RAD54-like (S. cerevisiae)
RAD9B	RAD9 checkpoint clamp component B
RALA	RAS like proto-oncogene A
RALGPS1	Ral GEF with PH domain and SH3 binding motif 1
RANBP6	RAN binding protein 6
RAP2C	RAP2C, member of RAS oncogene family
RAPGEF3	Rap guanine nucleotide exchange factor 3
RARG	retinoic acid receptor gamma
RARRES1	retinoic acid receptor responder 1
RARS	arginyl-tRNA synthetase
RASA3	RAS p21 protein activator 3
RASGRF1	Ras protein specific guanine nucleotide releasing factor 1
RASL10A	RAS like family 10 member A
RASSF5	Ras association domain family member 5
RBAK	RB associated KRAB zinc finger
RBBP7	RB binding protein 7, chromatin remodeling factor
RBM11	RNA binding motif protein 11
RBM14	RNA binding motif protein 14
RBM15	RNA binding motif protein 15
RBM15B	RNA binding motif protein 15B
RBM18	RNA binding motif protein 18
RBM19	RNA binding motif protein 19
RBM24	RNA binding motif protein 24
RBM39	RNA binding motif protein 39
RBMS2	RNA binding motif single stranded interacting protein 2
RBMX	RNA binding motif protein, X-linked
RBMX2	RNA binding motif protein, X-linked 2
RCAN1	regulator of calcineurin 1
RCAN2	regulator of calcineurin 2
RCBTB2	RCC1 and BTB domain containing protein 2
RDH10	retinol dehydrogenase 10 (all-trans)
REEP3	receptor accessory protein 3
REM2	RRAD and GEM like GTPase 2
RERG	RAS like estrogen regulated growth inhibitor
RET	ret proto-oncogene
RFFL	ring finger and FYVE like domain containing E3 ubiquitin protein ligase
RFWD2	ring finger and WD repeat domain 2
RFX3	regulatory factor X3
RGL1	ral guanine nucleotide dissociation stimulator like 1
RGMB	repulsive guidance molecule family member b
RGPD5	RANBP2-like and GRIP domain containing 5
RGPD6	RANBP2-like and GRIP domain containing 6
RGS9	regulator of G-protein signaling 9
RHEB	Ras homolog enriched in brain
RHEBL1	Ras homolog enriched in brain like 1
RHOB	ras homolog family member B
RHOQ	ras homolog family member Q
RHOU	ras homolog family member U
RHPN2	rhophilin Rho GTPase binding protein 2
RIMBP3	RIMS binding protein 3
RIMBP3B	RIMS binding protein 3B
RIMBP3C	RIMS binding protein 3C
RIMS2	regulating synaptic membrane exocytosis 2
RINL	Ras and Rab interactor like
RIOK3	RIO kinase 3
RIPK1	receptor interacting serine/threonine kinase 1
RIPK2	receptor interacting serine/threonine kinase 2
RIPPLY2	ripply transcriptional repressor 2
RITA1	RBPJ interacting and tubulin associated 1
RND3	Rho family GTPase 3
RNF111	ring finger protein 111
RNF115	ring finger protein 115
RNF121	ring finger protein 121
RNF122	ring finger protein 122
RNF125	ring finger protein 125
RNF138	ring finger protein 138
RNF145	ring finger protein 145
RNF152	ring finger protein 152
RNF165	ring finger protein 165
RNF169	ring finger protein 169
RNF216	ring finger protein 216
RNF26	ring finger protein 26
RNF6	ring finger protein 6
ROBO2	roundabout guidance receptor 2
RP1L1	retinitis pigmentosa 1-like 1
RPA1	replication protein A1
RPL17	ribosomal protein L17
RPL7L1	ribosomal protein L7 like 1
RPS24	ribosomal protein S24
RPS6KL1	ribosomal protein S6 kinase like 1
RPUSD4	RNA pseudouridylate synthase domain containing 4
RRAGA	Ras related GTP binding A
RRP36	ribosomal RNA processing 36
RRP8	ribosomal RNA processing 8, methyltransferase, homolog (yeast)
RSPO1	R-spondin 1
RTL1	retrotransposon-like 1
RUNX1T1	RUNX1 translocation partner 1
RUNX2	runt related transcription factor 2
RUVBL1	RuvB like AAA ATPase 1
RXRA	retinoid X receptor alpha
S100A2	S100 calcium binding protein A2
S1PR1	sphingosine-1-phosphate receptor 1
S1PR3	sphingosine-1-phosphate receptor 3
S1PR5	sphingosine-1-phosphate receptor 5
SAMD4A	sterile alpha motif domain containing 4A
SARS	seryl-tRNA synthetase
SATB1	SATB homeobox 1
SATB2	SATB homeobox 2
SAV1	salvador family WW domain containing protein 1
SAXO2	stabilizer of axonemal microtubules 2
SAYSD1	SAYSVFN motif domain containing 1
SCAI	suppressor of cancer cell invasion
SCAMP2	secretory carrier membrane protein 2
SCAMP3	secretory carrier membrane protein 3
SCAMP5	secretory carrier membrane protein 5
SCARA5	scavenger receptor class A member 5
SCD	stearoyl-CoA desaturase
SCD5	stearoyl-CoA desaturase 5
SCN1B	sodium voltage-gated channel beta subunit 1
SCN2B	sodium voltage-gated channel beta subunit 2
SCN3B	sodium voltage-gated channel beta subunit 3
SCN8A	sodium voltage-gated channel alpha subunit 8
SCNN1B	sodium channel epithelial 1 beta subunit
SCO1	SCO1, cytochrome c oxidase assembly protein
SCRN3	secernin 3
SDC2	syndecan 2
SDCBP2	syndecan binding protein 2
SDHA	succinate dehydrogenase complex flavoprotein subunit A
SDHC	succinate dehydrogenase complex subunit C
SEC22B	SEC22 homolog B, vesicle trafficking protein (gene/pseudogene)
SEC23IP	SEC23 interacting protein
SEMA3C	semaphorin 3C
SENP7	SUMO1/sentrin specific peptidase 7
SEPHS1	selenophosphate synthetase 1
SEPHS2	selenophosphate synthetase 2
SEPT5	septin 5
SERTM1	serine rich and transmembrane domain containing 1
SESN1	sestrin 1
SESN2	sestrin 2
SETD1B	SET domain containing 1B
SETDB2	SET domain bifurcated 2
SF1	splicing factor 1
SFPQ	splicing factor proline and glutamine rich
SFRP1	secreted frizzled related protein 1
SFTPC	surfactant protein C
SFXN1	sideroflexin 1
SFXN2	sideroflexin 2
SFXN3	sideroflexin 3
SGCE	sarcoglycan epsilon
SGTB	small glutamine rich tetratricopeptide repeat containing beta
SH2D3C	SH2 domain containing 3C
SH2D4A	SH2 domain containing 4A
SH3KBP1	SH3 domain containing kinase binding protein 1
SH3RF2	SH3 domain containing ring finger 2
SHBG	sex hormone binding globulin
SHC2	SHC adaptor protein 2
SHD	Src homology 2 domain containing transforming protein D
SHISA2	shisa family member 2
SHISA7	shisa family member 7
SHMT2	serine hydroxymethyltransferase 2
SHPK	sedoheptulokinase
SHROOM3	shroom family member 3
SHTN1	shootin 1
SIGLEC11	sialic acid binding Ig like lectin 11
SIX1	SIX homeobox 1
SKA1	spindle and kinetochore associated complex subunit 1
SKA3	spindle and kinetochore associated complex subunit 3
SKIDA1	SKI/DACH domain containing 1
SKP2	S-phase kinase associated protein 2
SLC10A4	solute carrier family 10 member 4
SLC13A4	solute carrier family 13 member 4
SLC15A1	solute carrier family 15 member 1
SLC16A1	solute carrier family 16 member 1
SLC16A10	solute carrier family 16 member 10
SLC16A13	solute carrier family 16 member 13
SLC1A1	solute carrier family 1 member 1
SLC1A4	solute carrier family 1 member 4
SLC22A15	solute carrier family 22 member 15
SLC24A4	solute carrier family 24 member 4
SLC25A11	solute carrier family 25 member 11
SLC25A13	solute carrier family 25 member 13
SLC25A15	solute carrier family 25 member 15
SLC25A25	solute carrier family 25 member 25
SLC25A27	solute carrier family 25 member 27
SLC25A44	solute carrier family 25 member 44
SLC25A46	solute carrier family 25 member 46
SLC27A4	solute carrier family 27 member 4
SLC29A3	solute carrier family 29 member 3
SLC2A3	solute carrier family 2 member 3
SLC2A4	solute carrier family 2 member 4
SLC30A1	solute carrier family 30 member 1
SLC30A3	solute carrier family 30 member 3
SLC35A4	solute carrier family 35 member A4
SLC35A5	solute carrier family 35 member A5
SLC35F6	solute carrier family 35 member F6
SLC35G2	solute carrier family 35 member G2
SLC38A4	solute carrier family 38 member 4
SLC38A7	solute carrier family 38 member 7
SLC39A1	solute carrier family 39 member 1
SLC3A2	solute carrier family 3 member 2
SLC40A1	solute carrier family 40 member 1
SLC46A1	solute carrier family 46 member 1
SLC4A2	solute carrier family 4 member 2
SLC4A9	solute carrier family 4 member 9
SLC6A9	solute carrier family 6 member 9
SLC7A5	solute carrier family 7 member 5
SLC7A7	solute carrier family 7 member 7
SLC7A8	solute carrier family 7 member 8
SLC8A2	solute carrier family 8 member A2
SLC9A8	solute carrier family 9 member A8
SLCO2A1	solute carrier organic anion transporter family member 2A1
SLF2	SMC5-SMC6 complex localization factor 2
SLFN11	schlafen family member 11
SLITRK3	SLIT and NTRK like family member 3
SMG6	SMG6, nonsense mediated mRNA decay factor
SMIM12	small integral membrane protein 12
SMOX	spermine oxidase
SMS	spermine synthase
SMTNL2	smoothelin like 2
SNAI2	snail family transcriptional repressor 2
SNAP47	synaptosome associated protein 47
SNAPC1	small nuclear RNA activating complex polypeptide 1
SNCAIP	synuclein alpha interacting protein
SNHG1	small nucleolar RNA host gene 1
SNN	stannin
SNRNP40	small nuclear ribonucleoprotein U5 subunit 40
SNTB2	syntrophin beta 2
SNUPN	snurportin 1
SNX1	sorting nexin 1
SNX18	sorting nexin 18
SNX8	sorting nexin 8
SOGA3	SOGA family member 3
SOHLH2	spermatogenesis and oogenesis specific basic helix-loop-helix 2
SORBS2	sorbin and SH3 domain containing 2
SOWAHA	sosondowah ankyrin repeat domain family member A
SOX1	SRY-box 1
SOX4	SRY-box 4
SOX9	SRY-box 9
SP4	Sp4 transcription factor
SP6	Sp6 transcription factor
SPATA6L	spermatogenesis associated 6 like
SPATA7	spermatogenesis associated 7
SPATS2L	spermatogenesis associated serine rich 2 like
SPHK2	sphingosine kinase 2
SPICE1	spindle and centriole associated protein 1
SPNS1	sphingolipid transporter 1 (putative)
SPOCD1	SPOC domain containing 1
SPON2	spondin 2
SPOP	speckle type BTB/POZ protein
SPPL3	signal peptide peptidase like 3
SPRY4	sprouty RTK signaling antagonist 4
SPSB4	splA/ryanodine receptor domain and SOCS box containing 4
SRBD1	S1 RNA binding domain 1
SRD5A3	steroid 5 alpha-reductase 3
SRGAP3	SLIT-ROBO Rho GTPase activating protein 3
SRL	sarcalumenin
SRRM1	serine and arginine repetitive matrix 1
SSBP2	single stranded DNA binding protein 2
SSRP1	structure specific recognition protein 1
SSTR2	somatostatin receptor 2
ST6GALNAC2	ST6 N-acetylgalactosaminide alpha-2,6-sialyltransferase 2
ST7L	suppression of tumorigenicity 7 like
STAC2	SH3 and cysteine rich domain 2
STAG3L4	stromal antigen 3-like 4 (pseudogene)
STAM2	signal transducing adaptor molecule 2
STAMBPL1	STAM binding protein like 1
STARD4	StAR related lipid transfer domain containing 4
STARD7	StAR related lipid transfer domain containing 7
STC2	stanniocalcin 2
STK3	serine/threonine kinase 3
STRBP	spermatid perinuclear RNA binding protein
STX12	syntaxin 12
STX16	syntaxin 16
STX2	syntaxin 2
STX3	syntaxin 3
STXBP5L	syntaxin binding protein 5 like
STYX	serine/threonine/tyrosine interacting protein
SUCLG2	succinate-CoA ligase GDP-forming beta subunit
SUFU	SUFU negative regulator of hedgehog signaling
SUMF1	sulfatase modifying factor 1
SUPT7L	SPT7-like STAGA complex gamma subunit
SURF4	surfeit 4
SYK	spleen associated tyrosine kinase
SYN3	synapsin III
SYNDIG1	synapse differentiation inducing 1
SYNGR3	synaptogyrin 3
SYNPO	synaptopodin
SYP	synaptophysin
SYS1	SYS1, golgi trafficking protein
SYT17	synaptotagmin 17
SYTL1	synaptotagmin like 1
SYTL4	synaptotagmin like 4
TAC1	tachykinin precursor 1
TACR1	tachykinin receptor 1
TAF1D	TATA-box binding protein associated factor, RNA polymerase I subunit D
TAF5L	TATA-box binding protein associated factor 5 like
TAF9B	TATA-box binding protein associated factor 9b
TAGLN2	transgelin 2
TAPT1	transmembrane anterior posterior transformation 1
TARS	threonyl-tRNA synthetase
TARS2	threonyl-tRNA synthetase 2, mitochondrial (putative)
TAX1BP1	Tax1 binding protein 1
TBC1D10C	TBC1 domain family member 10C
TBC1D13	TBC1 domain family member 13
TBC1D14	TBC1 domain family member 14
TBC1D23	TBC1 domain family member 23
TBC1D25	TBC1 domain family member 25
TBC1D30	TBC1 domain family member 30
TBCEL	tubulin folding cofactor E like
TBL2	transducin beta like 2
TBPL1	TATA-box binding protein like 1
TBPL2	TATA-box binding protein like 2
TC2N	tandem C2 domains, nuclear
TCAF1	TRPM8 channel associated factor 1
TCEA1	transcription elongation factor A1
TCTA	T-cell leukemia translocation altered
TCTN2	tectonic family member 2
TDP1	tyrosyl-DNA phosphodiesterase 1
TEAD3	TEA domain transcription factor 3
TECPR2	tectonin beta-propeller repeat containing 2
TERF1	telomeric repeat binding factor 1
TES	testin LIM domain protein
TEX261	testis expressed 261
TFB2M	transcription factor B2, mitochondrial
TFCP2	transcription factor CP2
TFDP1	transcription factor Dp-1
TFPI	tissue factor pathway inhibitor
TFPT	TCF3 fusion partner
TGFA	transforming growth factor alpha
TGFB2	transforming growth factor beta 2
TGM2	transglutaminase 2
TGM4	transglutaminase 4
THEM6	thioesterase superfamily member 6
THRAP3	thyroid hormone receptor associated protein 3
THSD1	thrombospondin type 1 domain containing 1
THSD1P1	thrombospondin type 1 domain containing 1 pseudogene 1
TIAL1	TIA1 cytotoxic granule associated RNA binding protein like 1
TIMELESS	timeless circadian clock
TIPRL	TOR signaling pathway regulator
TIRAP	TIR domain containing adaptor protein
TLDC1	TBC/LysM-associated domain containing 1
TLE4	transducin like enhancer of split 4
TLK2	tousled like kinase 2
TM2D2	TM2 domain containing 2
TM9SF1	transmembrane 9 superfamily member 1
TMC5	transmembrane channel like 5
TMC7	transmembrane channel like 7
TMCO4	transmembrane and coiled-coil domains 4
TMED4	transmembrane p24 trafficking protein 4
TMEFF2	transmembrane protein with EGF like and two follistatin like domains 2
TMEM100	transmembrane protein 100
TMEM104	transmembrane protein 104
TMEM131	transmembrane protein 131
TMEM135	transmembrane protein 135
TMEM151B	transmembrane protein 151B
TMEM167B	transmembrane protein 167B
TMEM168	transmembrane protein 168
TMEM178A	transmembrane protein 178A
TMEM18	transmembrane protein 18
TMEM185B	transmembrane protein 185B
TMEM200A	transmembrane protein 200A
TMEM206	transmembrane protein 206
TMEM218	transmembrane protein 218
TMEM229A	transmembrane protein 229A
TMEM231	transmembrane protein 231
TMEM268	transmembrane protein 268
TMEM39A	transmembrane protein 39A
TMEM43	transmembrane protein 43
TMEM45A	transmembrane protein 45A
TMEM5	transmembrane protein 5
TMEM59L	transmembrane protein 59 like
TMEM65	transmembrane protein 65
TMEM79	transmembrane protein 79
TMEM88B	transmembrane protein 88B
TMEM98	transmembrane protein 98
TMOD1	tropomodulin 1
TMTC4	transmembrane and tetratricopeptide repeat containing 4
TMX1	thioredoxin related transmembrane protein 1
TMX2	thioredoxin related transmembrane protein 2
TMX2-CTNND1	TMX2-CTNND1 readthrough (NMD candidate)
TNC	tenascin C
TNFAIP1	TNF alpha induced protein 1
TNFAIP8L1	TNF alpha induced protein 8 like 1
TNFRSF10B	TNF receptor superfamily member 10b
TNFRSF10C	TNF receptor superfamily member 10c
TNFRSF10D	TNF receptor superfamily member 10d
TNFRSF12A	TNF receptor superfamily member 12A
TNFRSF19	TNF receptor superfamily member 19
TNFRSF1A	TNF receptor superfamily member 1A
TNFSF12	tumor necrosis factor superfamily member 12
TNNC1	troponin C1, slow skeletal and cardiac type
TNNC2	troponin C2, fast skeletal type
TNNI3	troponin I3, cardiac type
TOB2	transducer of ERBB2, 2
TOE1	target of EGR1, member 1 (nuclear)
TOLLIP	toll interacting protein
TOP1	topoisomerase (DNA) I
TOR1A	torsin family 1 member A
TOR1AIP2	torsin 1A interacting protein 2
TOR1B	torsin family 1 member B
TPCN2	two pore segment channel 2
TPK1	thiamin pyrophosphokinase 1
TPM4	tropomyosin 4
TPP1	tripeptidyl peptidase 1
TPRG1L	tumor protein p63 regulated 1 like
TRAF3IP1	TRAF3 interacting protein 1
TRAF3IP2	TRAF3 interacting protein 2
TRAF3IP2-AS1	TRAF3IP2 antisense RNA 1
TRERF1	transcriptional regulating factor 1
TRIB1	tribbles pseudokinase 1
TRIB3	tribbles pseudokinase 3
TRIM14	tripartite motif containing 14
TRIM24	tripartite motif containing 24
TRIM36	tripartite motif containing 36
TRIM39	tripartite motif containing 39
TRIM47	tripartite motif containing 47
TRIM6	tripartite motif containing 6
TRIM67	tripartite motif containing 67
TRIM69	tripartite motif containing 69
TRIM7	tripartite motif containing 7
TRIM72	tripartite motif containing 72
TRMO	tRNA methyltransferase O
TRMT10A	tRNA methyltransferase 10A
TRMT11	tRNA methyltransferase 11 homolog
TRMT1L	tRNA methyltransferase 1 like
TRMT5	tRNA methyltransferase 5
TRPC4	transient receptor potential cation channel subfamily C member 4
TRPC4AP	transient receptor potential cation channel subfamily C member 4 associated protein
TRPV3	transient receptor potential cation channel subfamily V member 3
TSC1	tuberous sclerosis 1
TSC22D3	TSC22 domain family member 3
TSFM	Ts translation elongation factor, mitochondrial
TSPAN1	tetraspanin 1
TSPAN14	tetraspanin 14
TSPAN2	tetraspanin 2
TSPAN7	tetraspanin 7
TSPYL1	TSPY like 1
TSTD2	thiosulfate sulfurtransferase like domain containing 2
TTC19	tetratricopeptide repeat domain 19
TTC27	tetratricopeptide repeat domain 27
TTC30A	tetratricopeptide repeat domain 30A
TTC36	tetratricopeptide repeat domain 36
TTC39B	tetratricopeptide repeat domain 39B
TTLL7	tubulin tyrosine ligase like 7
TTPAL	alpha tocopherol transfer protein like
TUBD1	tubulin delta 1
TUBE1	tubulin epsilon 1
TULP3	tubby like protein 3
TULP4	tubby like protein 4
TUSC2	tumor suppressor candidate 2
TUSC3	tumor suppressor candidate 3
TWSG1	twisted gastrulation BMP signaling modulator 1
TXNDC11	thioredoxin domain containing 11
U2AF1L4	U2 small nuclear RNA auxiliary factor 1 like 4
UAP1	UDP-N-acetylglucosamine pyrophosphorylase 1
UBA1	ubiquitin like modifier activating enzyme 1
UBAC2-AS1	UBAC2 antisense RNA 1
UBAP2	ubiquitin associated protein 2
UBE2D4	ubiquitin conjugating enzyme E2 D4 (putative)
UBE2H	ubiquitin conjugating enzyme E2 H
UBE2J1	ubiquitin conjugating enzyme E2 J1
UBE2L3	ubiquitin conjugating enzyme E2 L3
UBE2QL1	ubiquitin conjugating enzyme E2 Q family like 1
UBE2W	ubiquitin conjugating enzyme E2 W (putative)
UBE3B	ubiquitin protein ligase E3B
UBE4B	ubiquitination factor E4B
UBIAD1	UbiA prenyltransferase domain containing 1
UBL4A	ubiquitin like 4A
UBOX5	U-box domain containing 5
UBTF	upstream binding transcription factor, RNA polymerase I
UFSP1	UFM1 specific peptidase 1 (inactive)
ULBP1	UL16 binding protein 1
ULBP2	UL16 binding protein 2
ULBP3	UL16 binding protein 3
UMPS	uridine monophosphate synthetase
UNC13A	unc-13 homolog A
UNC79	unc-79 homolog (C. elegans)
UPP1	uridine phosphorylase 1
UPRT	uracil phosphoribosyltransferase homolog
UQCRFS1	ubiquinol-cytochrome c reductase, Rieske iron-sulfur polypeptide 1
USP2	ubiquitin specific peptidase 2
USP25	ubiquitin specific peptidase 25
USP3	ubiquitin specific peptidase 3
UTP14A	UTP14A small subunit processome component
UTP20	UTP20, small subunit processome component
UVRAG	UV radiation resistance associated
VASH1	vasohibin 1
VASH2	vasohibin 2
VAX1	ventral anterior homeobox 1
VAX2	ventral anterior homeobox 2
VCP	valosin containing protein
VEGFA	vascular endothelial growth factor A
VEPH1	ventricular zone expressed PH domain containing 1
VGLL2	vestigial like family member 2
VGLL4	vestigial like family member 4
VPS18	VPS18, CORVET/HOPS core subunit
VPS33A	VPS33A, CORVET/HOPS core subunit
VPS37A	VPS37A, ESCRT-I subunit
VPS4B	vacuolar protein sorting 4 homolog B
VPS50	VPS50, EARP/GARPII complex subunit
VSTM2B	V-set and transmembrane domain containing 2B
VTI1B	vesicle transport through interaction with t-SNAREs 1B
VWA2	von Willebrand factor A domain containing 2
VWA9	von Willebrand factor A domain containing 9
WARS	tryptophanyl-tRNA synthetase
WBP1L	WW domain binding protein 1-like
WDFY2	WD repeat and FYVE domain containing 2
WDR4	WD repeat domain 4
WDR47	WD repeat domain 47
WDR77	WD repeat domain 77
WDR81	WD repeat domain 81
WLS	wntless Wnt ligand secretion mediator
WNT16	Wnt family member 16
WNT3A	Wnt family member 3A
WNT5A	Wnt family member 5A
WNT8B	Wnt family member 8B
WNT9B	Wnt family member 9B
XBP1	X-box binding protein 1
XKR7	XK related 7
XPNPEP1	X-prolyl aminopeptidase 1
XPOT	exportin for tRNA
XRCC5	X-ray repair cross complementing 5
XRRA1	X-ray radiation resistance associated 1
XXYLT1	xyloside xylosyltransferase 1
XYLB	xylulokinase
YAF2	YY1 associated factor 2
YARS	tyrosyl-tRNA synthetase
YKT6	YKT6 v-SNARE homolog (S. cerevisiae)
YOD1	YOD1 deubiquitinase
YPEL5	yippee like 5
YWHAQ	tyrosine 3-monooxygenase/tryptophan 5-monooxygenase activation protein theta
YY1	YY1 transcription factor
YY1AP1	YY1 associated protein 1
ZBTB1	zinc finger and BTB domain containing 1
ZBTB14	zinc finger and BTB domain containing 14
ZBTB2	zinc finger and BTB domain containing 2
ZBTB38	zinc finger and BTB domain containing 38
ZBTB45	zinc finger and BTB domain containing 45
ZBTB7B	zinc finger and BTB domain containing 7B
ZC3H12C	zinc finger CCCH-type containing 12C
ZC3H4	zinc finger CCCH-type containing 4
ZCCHC11	zinc finger CCHC-type containing 11
ZCCHC14	zinc finger CCHC-type containing 14
ZCCHC24	zinc finger CCHC-type containing 24
ZDHHC16	zinc finger DHHC-type containing 16
ZDHHC3	zinc finger DHHC-type containing 3
ZDHHC5	zinc finger DHHC-type containing 5
ZEB1-AS1	ZEB1 antisense RNA 1
ZFAND2A	zinc finger AN1-type containing 2A
ZFAND3	zinc finger AN1-type containing 3
ZFAS1	ZNFX1 antisense RNA 1
ZFPM2	zinc finger protein, FOG family member 2
ZGRF1	zinc finger GRF-type containing 1
ZIK1	zinc finger protein interacting with K protein 1
ZMPSTE24	zinc metallopeptidase STE24
ZMYND11	zinc finger MYND-type containing 11
ZMYND8	zinc finger MYND-type containing 8
ZNF12	zinc finger protein 12
ZNF121	zinc finger protein 121
ZNF131	zinc finger protein 131
ZNF134	zinc finger protein 134
ZNF160	zinc finger protein 160
ZNF202	zinc finger protein 202
ZNF215	zinc finger protein 215
ZNF229	zinc finger protein 229
ZNF275	zinc finger protein 275
ZNF277	zinc finger protein 277
ZNF284	zinc finger protein 284
ZNF324	zinc finger protein 324
ZNF324B	zinc finger protein 324B
ZNF354B	zinc finger protein 354B
ZNF367	zinc finger protein 367
ZNF37A	zinc finger protein 37A
ZNF391	zinc finger protein 391
ZNF416	zinc finger protein 416
ZNF417	zinc finger protein 417
ZNF425	zinc finger protein 425
ZNF445	zinc finger protein 445
ZNF451	zinc finger protein 451
ZNF460	zinc finger protein 460
ZNF461	zinc finger protein 461
ZNF467	zinc finger protein 467
ZNF48	zinc finger protein 48
ZNF480	zinc finger protein 480
ZNF488	zinc finger protein 488
ZNF503-AS2	ZNF503 antisense RNA 2
ZNF524	zinc finger protein 524
ZNF529	zinc finger protein 529
ZNF544	zinc finger protein 544
ZNF551	zinc finger protein 551
ZNF552	zinc finger protein 552
ZNF555	zinc finger protein 555
ZNF567	zinc finger protein 567
ZNF569	zinc finger protein 569
ZNF599	zinc finger protein 599
ZNF629	zinc finger protein 629
ZNF639	zinc finger protein 639
ZNF670	zinc finger protein 670
ZNF672	zinc finger protein 672
ZNF697	zinc finger protein 697
ZNF71	zinc finger protein 71
ZNF711	zinc finger protein 711
ZNF718	zinc finger protein 718
ZNF747	zinc finger protein 747
ZNF772	zinc finger protein 772
ZNF786	zinc finger protein 786
ZNF79	zinc finger protein 79
ZNF805	zinc finger protein 805
ZNF860	zinc finger protein 860
ZNRF3	zinc and ring finger 3
ZRANB3	zinc finger RANBP2-type containing 3
ZSCAN12	zinc finger and SCAN domain containing 12
ZSCAN22	zinc finger and SCAN domain containing 22
ZSCAN25	zinc finger and SCAN domain containing 25
ZSCAN5A	zinc finger and SCAN domain containing 5A
ZSWIM3	zinc finger SWIM-type containing 3
ZSWIM6	zinc finger SWIM-type containing 6
ZYG11A	zyg-11 family member A, cell cycle regulator

## Sheet: Cluster B H3K9ac Enriched DEGs
HGNC Approved Gene Symbol	HGNC Approved Name
ACSL3	acyl-CoA synthetase long-chain family member 3
ADGRA1	adhesion G protein-coupled receptor A1
AMPH	amphiphysin
ARL13B	ADP ribosylation factor like GTPase 13B
ARSJ	arylsulfatase family member J
BCAS3	BCAS3, microtubule associated cell migration factor
C17orf78	chromosome 17 open reading frame 78
C3orf58	chromosome 3 open reading frame 58
CAMTA1	calmodulin binding transcription activator 1
CD44	CD44 molecule (Indian blood group)
CHD2	chromodomain helicase DNA binding protein 2
CLMN	calmin
CLN6	ceroid-lipofuscinosis, neuronal 6, late infantile, variant
CMSS1	cms1 ribosomal small subunit homolog (yeast)
COL23A1	collagen type XXIII alpha 1 chain
COX19	COX19, cytochrome c oxidase assembly factor
CYBB	cytochrome b-245 beta chain
DCLK2	doublecortin like kinase 2
DMGDH	dimethylglycine dehydrogenase
FAM184A	family with sequence similarity 184 member A
FHIT	fragile histidine triad
GALM	galactose mutarotase
GRTP1-AS1	GRTP1 antisense RNA 1
HIBADH	3-hydroxyisobutyrate dehydrogenase
HMGCLL1	3-hydroxymethyl-3-methylglutaryl-CoA lyase like 1
HNF4G	hepatocyte nuclear factor 4 gamma
HNRNPA1L2	heterogeneous nuclear ribonucleoprotein A1-like 2
HOMER1	homer scaffolding protein 1
HS6ST3	heparan sulfate 6-O-sulfotransferase 3
IL31RA	interleukin 31 receptor A
INSC	inscuteable homolog (Drosophila)
LMOD1	leiomodin 1
LRP1B	LDL receptor related protein 1B
LRRIQ3	leucine rich repeats and IQ motif containing 3
MAML3	mastermind like transcriptional coactivator 3
MAP2	microtubule associated protein 2
MAPKAP1	mitogen-activated protein kinase associated protein 1
MCCC2	methylcrotonoyl-CoA carboxylase 2
MCTP2	multiple C2 and transmembrane domain containing 2
NEGR1	neuronal growth regulator 1
PCCB	propionyl-CoA carboxylase beta subunit
PHACTR1	phosphatase and actin regulator 1
PKP2	plakophilin 2
PRR5L	proline rich 5 like
RAD54B	RAD54 homolog B (S. cerevisiae)
RIN3	Ras and Rab interactor 3
RORA	RAR related orphan receptor A
RTF1	RTF1 homolog, Paf1/RNA polymerase II complex component
RTN1	reticulon 1
RUBCNL	RUN and cysteine rich domain containing beclin 1 interacting protein like
RYR3	ryanodine receptor 3
SLC2A12	solute carrier family 2 member 12
SOX5	SRY-box 5
STAG1	stromal antigen 1
SYTL2	synaptotagmin like 2
THADA	THADA, armadillo repeat containing
TLE1	transducin like enhancer of split 1
TMEM159	transmembrane protein 159
TMPRSS3	transmembrane protease, serine 3
UBL3	ubiquitin like 3
WRAP53	WD repeat containing antisense to TP53
WWOX	WW domain containing oxidoreductase
WWP2	WW domain containing E3 ubiquitin protein ligase 2
ZC4H2	zinc finger C4H2-type containing
ZNF483	zinc finger protein 483

## Sheet: Cluster-A-Pathway
Ingenuity Canonical Pathways	-log(p-value)	Ratio	Molecules
tRNA Charging	5.47	0.359	CARS,IARS2,DARS2,TARS,MARS,QARS,NARS,PARS2,WARS,TARS2,RARS,YARS,EARS2,SARS
Superpathway of Cholesterol Biosynthesis	4.85	0.393	FDFT1,DHCR7,NSDHL,PMVK,IDI1,DHCR24,ACAT1,HSD17B7,LSS,HMGCR,HMGCS1
AMPK Signaling	4.07	0.171	FOXO4,TSC1,DPF1,PIK3R1,CHRNB4,PDPK1,PIK3R4,CCND1,PPM1D,EIF4EBP1,CCNA2,GYS1,PPM1J,PRKAA1,PRKAR1B,AK7,AKT1S1,ADRA1B,ADRB2,RAB27A,ACACB,PPP2R5D,FGFR2,CREB5,SLC2A4,PPP2R5A,ADRA1D,PFKM,PRKAR2B,PPM1B,CDKN1A,PRKAG2,AK4,PIK3CD,HMGCR,RAB6A,PHF10
Ethanol Degradation IV	3.72	0.36	ALDH4A1,ALDH1B1,ACSS3,ALDH1A3,ALDH3A2,CAT,ALDH1A2,CYGB,ALDH9A1
Glioblastoma Multiforme Signaling	3.66	0.179	TSC1,PLCB2,PIK3R1,NOTUM,WNT16,FZD1,PLCH2,PIK3R4,CCND1,WNT8B,MYC,PLCE1,RHOB,RHOU,E2F8,WNT9B,FGFR2,MDM2,PDGFB,CCNE1,PLCB4,IGF2,RHOQ,WNT3A,RND3,CDKN1A,PIK3CD,PDGFD,WNT5A
Estrogen-mediated S-phase Entry	3.57	0.346	MYC,CCNA2,CCNE1,TFDP1,CDKN1A,CCND1,E2F8,CDC25A,SKP2
Cholesterol Biosynthesis I	3.31	0.462	FDFT1,DHCR7,NSDHL,DHCR24,HSD17B7,LSS
Cholesterol Biosynthesis II (via 24,25-dihydrolanosterol)	3.31	0.462	FDFT1,DHCR7,NSDHL,DHCR24,HSD17B7,LSS
Cholesterol Biosynthesis III (via Desmosterol)	3.31	0.462	FDFT1,DHCR7,NSDHL,DHCR24,HSD17B7,LSS
Putrescine Degradation III	3.25	0.348	ALDH4A1,ALDH1B1,ALDH1A3,SMOX,ALDH3A2,ALDH1A2,ALDH9A1,MAOA
Molecular Mechanisms of Cancer	3.24	0.14	MAP2K4,PLCB2,PIK3R1,WNT16,GSK3A,BMPR1B,PIK3R4,CCND1,MYC,RASGRF1,ITGA3,RHOB,SUFU,CDC25A,PRKCQ,TFDP1,CASP3,ITGA5,FGFR2,RAPGEF3,AURKA,BCL2L1,CDH1,CCND2,RHOQ,RND3,APH1A,PIK3CD,ADCY10,MAP2K6,FYN,RALA,BMP3,FZD1,WNT8B,JUN,CDK17,RHOU,TGFB2,PRKAR1B,ARHGEF2,E2F8,PMAIP1,WNT9B,GNA12,GNAI1,MDM2,PLCB4,CCNE1,WNT3A,PRKAR2B,CDKN1A,PRKAG2,BMP6,WNT5A
Sphingosine-1-phosphate Signaling	3.2	0.184	PLCB2,CASP3,S1PR5,PIK3R1,GNA12,NOTUM,GNAI1,FGFR2,PLCH2,PIK3R4,PDGFB,S1PR3,PLCB4,PLCE1,RHOQ,RND3,RHOB,CASQ1,S1PR1,RHOU,PIK3CD,ADCY10,PDGFD
Insulin Receptor Signaling	3.17	0.177	FYN,FOXO4,TSC1,PIK3R1,PDPK1,GSK3A,PIK3R4,EIF4EBP1,GYS1,PPP1R10,PDE3B,PRKAR1B,SCNN1B,FGFR2,ACLY,SLC2A4,GRB10,RHOQ,PRKAR2B,INPP5F,EIF2B5,PRKAG2,ASIC1,PIK3CD,INPP5K
Human Embryonic Stem Cell Pluripotency	3.08	0.175	NTF3,NTF4,BMP3,PIK3R1,WNT16,PDPK1,GSK3A,FZD1,NGF,PIK3R4,WNT8B,TGFB2,WNT9B,S1PR5,ACVR1,FGFR2,INHBA,PDGFB,S1PR3,WNT3A,S1PR1,PIK3CD,BMP6,PDGFD,WNT5A
Tryptophan Degradation X (Mammalian, via Tryptamine)	2.97	0.32	ALDH4A1,ALDH1B1,ALDH1A3,SMOX,ALDH3A2,ALDH1A2,ALDH9A1,MAOA
Dopamine-DARPP32 Feedback in cAMP Signaling	2.87	0.165	PLCB2,CSNK1G1,NOTUM,PLCH2,PLCE1,PPP1R10,PPM1J,PRKAR1B,GUCY1B3,CALY,KCNJ12,GRIN1,KCNJ8,PRKCQ,GUCY1A3,PPP2R5D,GNAI1,CACNA1C,PPP3CC,CREB5,PPP2R5A,CALM1 (includes others),PLCB4,PRKAR2B,KCNJ5,PRKAG2,ADCY10
Melatonin Signaling	2.83	0.208	MAP2K6,MAP2K4,PLCB2,PRKCQ,NOTUM,GNAI1,PLCH2,SLC2A4,CALM1 (includes others),PLCB4,PRKAR2B,PLCE1,PRKAR1B,PRKAG2,MAP2K5
Cyclins and Cell Cycle Regulation	2.78	0.2	TFDP1,PPP2R5D,HDAC1,CUL1,CCND1,PPP2R5A,SKP2,CCNA2,MYT1,CCNE1,CCND2,PPM1J,CDKN1A,TGFB2,E2F8,CDC25A
Oxidative Ethanol Degradation III	2.78	0.333	ALDH4A1,ALDH1B1,ACSS3,ALDH1A3,ALDH3A2,ALDH1A2,ALDH9A1
Superpathway of Inositol Phosphate Compounds	2.74	0.149	FYN,PLCB2,DUSP8,PIK3R1,PIP4K2B,STYX,PLCH2,PPM1K,PIK3R4,PTPN12,DUSP5,PLCE1,PTPRO,DUSP10,PIP5KL1,PMPCA,CDC25A,PPFIA1,PLPP7,PPP2R5D,PPTC7,FGFR2,PPP4R1,PTPRM,PPP2R5A,PLD4,PTPRH,PIP5K1A,PLCB4,INPP5F,DUSP1,PPM1H,PIK3CD,MTMR7,INPP5K
D-myo-inositol (1,4,5)-Trisphosphate Biosynthesis	2.73	0.296	PLD4,PIP5K1A,PLCB4,PLCB2,PLCE1,PIP5KL1,PIP4K2B,PLCH2
Aldosterone Signaling in Epithelial Cells	2.71	0.161	PLCB2,HSPA14,PIK3R1,DNAJC12,NOTUM,PIP4K2B,PDPK1,PLCH2,DNAJA1,PIK3R4,PLCE1,PIP5KL1,DNAJB1,SCNN1B,DNAJC16,PRKCQ,HSPA9,FGFR2,DNAJC1,DNAJC21,PIP5K1A,PLCB4,DNAJC5,DUSP1,ASIC1,PIK3CD,DNAJB5
Thyroid Cancer Signaling	2.66	0.25	PPARG,MYC,CDH1,NTF3,NTF4,GDNF,NGF,RXRA,RET,CCND1
Nitric Oxide Signaling in the Cardiovascular System	2.65	0.177	PDE2A,PRKCQ,GUCY1A3,PIK3R1,CACNA1C,FGFR2,ARG2,PIK3R4,BDKRB2,VEGFA,CALM1 (includes others),PRKAR2B,PDE3B,PDE1B,PRKAR1B,PRKAA1,PRKAG2,PDE5A,PIK3CD,GUCY1B3
Inhibition of Angiogenesis by TSP1	2.63	0.265	VEGFA,MAP2K4,FYN,CD47,JUN,GUCY1A3,CASP3,SDC2,GUCY1B3
D-myo-inositol-5-phosphate Metabolism	2.63	0.16	PLCB2,DUSP8,PIP4K2B,STYX,PPM1K,PLCH2,PTPN12,DUSP5,PLCE1,PTPRO,DUSP10,CDC25A,PPFIA1,PLPP7,PPP2R5D,PPTC7,PPP4R1,PTPRM,PPP2R5A,PLD4,PTPRH,PLCB4,INPP5F,DUSP1,PPM1H,MTMR7
Ceramide Signaling	2.48	0.183	MAP2K4,S1PR5,TNFRSF1A,PPP2R5D,PIK3R1,SPHK2,FGFR2,CERK,PIK3R4,PPP2R5A,S1PR3,CTSD,JUN,PPM1J,NGFR,S1PR1,PIK3CD
Aryl Hydrocarbon Receptor Signaling	2.48	0.163	ALDH1B1,ALDH4A1,CYP1A1,TFDP1,MDM2,RARG,CCND1,ALDH9A1,TGM2,MYC,CTSD,CCNA2,CCNE1,JUN,CCND2,ALDH1A3,ALDH3A2,CDKN1A,ALDH1A2,TGFB2,DHFR,RXRA,NFE2L2
HMGB1 Signaling	2.47	0.165	MAP2K6,MAP2K4,IL12A,TNFRSF1A,PIK3R1,RBBP7,FGFR2,IFNGR1,PIK3R4,IL17B,KAT6B,JUN,RHOQ,RND3,RHOB,IL17D,NGFR,RHOU,TGFB2,PIK3CD,MAP2K5,IL11
PI3K/AKT Signaling	2.47	0.168	TSC1,RHEB,PPP2R5D,PIK3R1,GDF15,ITGA5,PDPK1,MDM2,GSK3A,CCND1,PPP2R5A,EIF4EBP1,YWHAQ,BCL2L1,ITGA3,GYS1,INPP5F,PPM1J,CDKN1A,PIK3CD,INPP5K
Mevalonate Pathway I	2.41	0.385	PMVK,IDI1,ACAT1,HMGCR,HMGCS1
Sperm Motility	2.38	0.165	CACNA1G,SLC16A10,PDE2A,PLCB2,PRKCQ,GUCY1A3,PLA2G10,NOTUM,PLCH2,NPPB,CALM1 (includes others),PLCB4,PRKAR2B,PLCE1,NPR1,PDE1B,PRKAR1B,PRKAG2,PNPLA3,ADCY10,GUCY1B3
p53 Signaling	2.38	0.171	PMAIP1,GADD45B,SNAI2,PLAGL1,PIK3R1,HDAC1,TNFRSF10B,FGFR2,MDM2,PIK3R4,CCND1,BCL2L1,JUN,CCND2,GADD45A,COQ8A,CDKN1A,PIK3CD,DRAM1
Dopamine Degradation	2.36	0.243	ALDH4A1,ALDH1B1,ALDH1A3,SMOX,ALDH3A2,ALDH1A2,LRTOMT,ALDH9A1,MAOA
Pancreatic Adenocarcinoma Signaling	2.34	0.167	MAP2K4,RALA,TFDP1,PIK3R1,FGFR2,HBEGF,MDM2,PIK3R4,CCND1,VEGFA,PLD4,BCL2L1,HMOX1,CCNE1,CDKN1A,GPLD1,TGFA,TGFB2,PIK3CD,E2F8
GADD45 Signaling	2.31	0.316	CCNE1,GADD45B,CCND2,GADD45A,CDKN1A,CCND1
Histamine Degradation	2.31	0.316	ALDH4A1,ALDH1B1,ALDH1A3,ALDH3A2,ALDH1A2,ALDH9A1
Cell Cycle: G1/S Checkpoint Regulation	2.3	0.197	TFDP1,HDAC1,CUL1,MDM2,CCND1,SKP2,MYC,CCNE1,CCND2,CDKN1A,TGFB2,E2F8,CDC25A
Wnt/β-catenin Signaling	2.27	0.151	SOX4,SOX1,WNT9B,CSNK1G1,PPP2R5D,HDAC1,ACVR1,WNT16,MDM2,GSK3A,KREMEN1,FZD1,RARG,CCND1,WNT8B,PPP2R5A,MYC,CDH1,WNT3A,JUN,PPM1J,TGFB2,TLE4,SOX9,SFRP1,WNT5A
Phagosome Formation	2.26	0.162	PLCB2,PRKCQ,MRC2,PIK3R1,NOTUM,ITGA5,FGFR2,PLCH2,PIK3R4,FCGR1A,ITGB2,ITGA3,PLCB4,PLCE1,RHOQ,RND3,RHOB,SYK,RHOU,PIK3CD,CR2
Folate Transformations I	2.26	0.444	MTHFR,MTHFD2,MTHFD1,SHMT2
Glutamate Degradation III (via 4-aminobutyrate)	2.21	0.6	SUCLG2,ABAT,GAD1
Noradrenaline and Adrenaline Degradation	2.12	0.225	ALDH4A1,ALDH1B1,ALDH1A3,SMOX,ALDH3A2,ALDH1A2,LRTOMT,ALDH9A1,MAOA
Neurotrophin/TRK Signaling	2.12	0.182	MAP2K6,MAP2K4,NTF3,NTF4,PIK3R1,FGFR2,PDPK1,NGF,PIK3R4,CREB5,JUN,NGFR,PIK3CD,MAP2K5
Dolichol and Dolichyl Phosphate Biosynthesis	2.1	1	DOLK,DHDDS
IL-8 Signaling	2.03	0.142	MAP2K4,PLCB2,PIK3R1,PIK3R4,CCND1,ITGB3,EIF4EBP1,VEGFA,HMOX1,JUN,RHOB,GPLD1,RHOU,LASP1,CR2,PRKCQ,GNA12,GNAI1,FGFR2,HBEGF,PLD4,BCL2L1,ITGB2,CDH1,RHOQ,CCND2,RND3,PIK3CD
ILK Signaling	2.03	0.142	MAP2K6,MAP2K4,SNAI2,PIK3R1,PDPK1,GSK3A,PIK3R4,CCND1,ITGB3,VEGFA,MYC,JUN,RHOB,PPM1J,RHOU,ITGB4,PARVA,CASP3,TNFRSF1A,PPP2R5D,FGFR2,CREB5,PPP2R5A,ITGB2,CDH1,RHOQ,RND3,PIK3CD
Endothelin-1 Signaling	1.98	0.142	PLCB2,PIK3R1,PLA2G10,NOTUM,PLCH2,PIK3R4,MYC,HMOX1,PLCE1,JUN,GPLD1,CASQ1,PNPLA3,GUCY1B3,PRKCQ,CASP3,GUCY1A3,GNA12,GNAI1,FGFR2,PLD4,PLCB4,SHC2,PIK3CD,MAPK7,PTGER2,ADCY10
Fatty Acid α-oxidation	1.97	0.273	ALDH4A1,ALDH1B1,ALDH1A3,ALDH3A2,ALDH1A2,ALDH9A1
HER-2 Signaling in Breast Cancer	1.97	0.17	TSC1,PRKCQ,PIK3R1,FGFR2,MDM2,GSK3A,PIK3R4,CCND1,AREG,ITGB3,ITGB2,CCNE1,CDKN1A,PIK3CD,ITGB4
Cardiac Hypertrophy Signaling	1.95	0.136	MAP2K6,MAP2K4,PLCB2,PIK3R1,NOTUM,PLCH2,PIK3R4,HAND2,PLCE1,JUN,RHOB,RHOU,PRKAR1B,TGFB2,ADRA1B,ADRB2,MYL12A,GNA12,GNAI1,CACNA1C,FGFR2,PPP3CC,ADRA1D,CALM1 (includes others),PLCB4,RHOQ,PRKAR2B,RND3,EIF2B5,PRKAG2,PIK3CD,ADCY10
3-phosphoinositide Biosynthesis	1.95	0.14	FYN,DUSP8,PIK3R1,PIP4K2B,STYX,PPM1K,PIK3R4,PTPN12,DUSP5,PTPRO,DUSP10,PIP5KL1,CDC25A,PPFIA1,PLPP7,PPP2R5D,PPTC7,FGFR2,PPP4R1,PTPRM,PPP2R5A,PTPRH,PIP5K1A,INPP5F,DUSP1,PPM1H,PIK3CD,MTMR7
Selenocysteine Biosynthesis II (Archaea and Eukaryotes)	1.94	0.5	SEPHS2,SEPHS1,SARS
Mitotic Roles of Polo-Like Kinase	1.89	0.182	KIF23,ESPL1,CDC20,PLK2,PPP2R5D,PPM1J,PRC1,ANAPC5,CDC7,PLK1,PPP2R5A,CDC25A
Colorectal Cancer Metastasis Signaling	1.88	0.133	MAP2K4,PIK3R1,MMP15,WNT16,FZD1,PIK3R4,CCND1,WNT8B,MYC,VEGFA,JUN,RHOB,RHOU,PRKAR1B,TGFB2,PTGER4,CASP3,WNT9B,TNFRSF1A,FGFR2,IFNGR1,BCL2L1,CDH1,RHOQ,PRKAR2B,WNT3A,MSH2,RND3,PRKAG2,PIK3CD,PTGER2,ADCY10,WNT5A
TCA Cycle II (Eukaryotic)	1.87	0.261	SDHA,ACO2,DLST,SDHC,MDH2,OGDH
Superpathway of Geranylgeranyldiphosphate Biosynthesis I (via Mevalonate)	1.86	0.294	PMVK,IDI1,ACAT1,HMGCR,HMGCS1
Axonal Guidance Signaling	1.78	0.119	PLCB2,NTF4,PIK3R1,WNT16,PLCH2,PIK3R4,VEGFA,ITGA3,PLCE1,SUFU,EPHA7,PRKCQ,ITGA5,FGFR2,L1CAM,HHIP,PPP3CC,PDGFB,SRGAP3,PIK3CD,PDGFD,NRP1,MME,FYN,ADAMTS7,NTF3,BMP3,NOTUM,EPHA4,FZD1,NGF,WNT8B,EFNB2,EPHA8,GLIS1,SDC2,NGFR,MKNK1,PRKAR1B,RASSF5,ROBO2,MYL12A,WNT9B,GNA12,GNAI1,EFNA1,PLCB4,PRKAR2B,WNT3A,PRKAG2,AFG3L2,SEMA3C,BMP6,WNT5A
Amyotrophic Lateral Sclerosis Signaling	1.72	0.153	GRIN1,CASP3,GDNF,NEFL,PIK3R1,GRIK3,NEFM,CACNA1C,FGFR2,PIK3R4,VEGFA,BCL2L1,HECW1,CAT,GLUL,CAPN2,PIK3CD
Leptin Signaling in Obesity	1.71	0.163	PLCB2,PIK3R1,NOTUM,FGFR2,PIK3R4,PLCH2,PLCB4,PRKAR2B,PLCE1,PDE3B,PRKAR1B,PRKAG2,PIK3CD,ADCY10
VDR/RXR Activation	1.7	0.167	CYP24A1,IL12A,PRKCQ,IGFBP5,HR,KLF4,YY1,GADD45A,RUNX2,MXD1,CDKN1A,TGFB2,RXRA
Glioma Invasiveness Signaling	1.7	0.171	RHOQ,RND3,RHOB,F2R,PIK3R1,HMMR,RHOU,FGFR2,PIK3CD,PLAU,PIK3R4,ITGB3
Unfolded protein response	1.65	0.182	PPARG,HSPA14,INSIG1,VCP,PPP1R15A,HSPA9,XBP1,OS9,NFE2L2,CEBPG
4-hydroxyproline Degradation I	1.65	0.667	ALDH4A1,GOT2
4-aminobutyrate Degradation I	1.65	0.667	SUCLG2,ABAT
Choline Biosynthesis III	1.63	0.308	PLD4,HMOX1,GPLD1,PHKA1
Oleate Biosynthesis II (Animals)	1.63	0.308	SCD,SCD5,UFSP1,FADS1
Neuregulin Signaling	1.63	0.159	PRKCQ,PIK3R1,ITGA5,HBEGF,PDPK1,TMEFF2,AREG,MYC,ITGA3,PICK1,TGFA,DLG4,ERRFI1,MATK
Huntington's Disease Signaling	1.62	0.128	MAP2K4,PLCB2,HSPA14,PIK3R1,PDPK1,NGF,PIK3R4,VTI1B,TGM2,CTSD,JUN,CPLX2,CASQ1,DLG4,DNAJB1,SDHA,PRKCQ,CASP3,YKT6,HDAC1,HSPA9,FGFR2,CREB5,TAF9B,BCL2L1,PLCB4,DNAJC5,ATP5B,STX16,PIK3CD,CAPN2,GOSR2
Antiproliferative Role of TOB in T Cell Signaling	1.62	0.231	CCNA2,CCNE1,CUL1,TGFB2,TWSG1,SKP2
Neuropathic Pain Signaling In Dorsal Horn Neurons	1.58	0.148	GRIN1,PLCB2,PRKCQ,PIK3R1,NOTUM,FGFR2,TAC1,GRM4,PLCH2,PIK3R4,TACR1,PLCB4,PRKAR2B,PLCE1,PRKAR1B,PRKAG2,PIK3CD
GPCR-Mediated Integration of Enteroendocrine Signaling Exemplified by an L Cell	1.56	0.164	PLCB4,PLCB2,PLCE1,PRKAR2B,NOTUM,PRKAG2,PRKAR1B,GNAI1,ADCY10,PLCH2,PYY,ADRB2
Cell Cycle: G2/M DNA Damage Checkpoint Regulation	1.56	0.184	YWHAQ,GADD45A,CUL1,CDKN1A,PLK1,MDM2,AURKA,SKP2,PPM1D
Role of CHK Proteins in Cell Cycle Checkpoint Control	1.55	0.175	PPP2R5D,PPM1J,CDKN1A,ATMIN,PLK1,RPA1,TLK2,E2F8,PPP2R5A,CDC25A
Glutamate Receptor Signaling	1.55	0.175	GRIN1,CALM1 (includes others),SLC1A4,HOMER2,PICK1,GRIK3,DLG4,GLUL,SLC1A1,GRM4
Histidine Degradation III	1.55	0.375	FTCD,MTHFD2,MTHFD1
P2Y Purigenic Receptor Signaling Pathway	1.54	0.142	PLCB2,PRKCQ,PIK3R1,NOTUM,GNAI1,FGFR2,PLCH2,CREB5,PIK3R4,ITGB3,MYC,PLCB4,JUN,PRKAR2B,PLCE1,PRKAR1B,PRKAG2,PIK3CD,ADCY10
Phenylalanine Degradation IV (Mammalian, via Side Chain)	1.52	0.286	SMOX,ALDH3A2,GOT2,MAOA
D-myo-inositol (1,4,5,6)-Tetrakisphosphate Biosynthesis	1.51	0.139	PPFIA1,PLPP7,DUSP8,PPP2R5D,PPTC7,PPP4R1,STYX,PPM1K,PTPN12,PTPRM,PPP2R5A,DUSP5,PTPRH,INPP5F,DUSP1,PTPRO,DUSP10,PPM1H,MTMR7,CDC25A
D-myo-inositol (3,4,5,6)-tetrakisphosphate Biosynthesis	1.51	0.139	PPFIA1,PLPP7,DUSP8,PPP2R5D,PPTC7,PPP4R1,STYX,PPM1K,PTPN12,PTPRM,PPP2R5A,DUSP5,PTPRH,INPP5F,DUSP1,PTPRO,DUSP10,PPM1H,MTMR7,CDC25A
eNOS Signaling	1.49	0.134	PRKCQ,CASP3,HSPA14,GUCY1A3,PIK3R1,HSPA9,CHRNB4,PDPK1,FGFR2,AQP4,PIK3R4,VEGFA,BDKRB2,CCNA2,CALM1 (includes others),PRKAR2B,LPAR1,PRKAR1B,PRKAA1,PRKAG2,PIK3CD,ADCY10,GUCY1B3
ERK/MAPK Signaling	1.48	0.13	FYN,PIK3R1,PLA2G10,PIK3R4,EIF4EBP1,YWHAQ,MYC,ITGA3,PPP1R10,PPM1J,MKNK1,PRKAR1B,PPARG,PPP2R5D,ITGA5,FGFR2,MAPKAPK5,RAPGEF3,CREB5,PPP2R5A,ELF1,PRKAR2B,DUSP9,DUSP1,PRKAG2,PIK3CD
G-Protein Coupled Receptor Signaling	1.47	0.123	FYN,PLCB2,PDE7A,PIK3R1,PDPK1,PIK3R4,AVPR1A,PDE3B,PRKAR1B,ADORA1,APEX1,PTGER4,ADRA1B,ADRB2,PDE2A,GNAI1,FGFR2,RAPGEF3,GRM4,CREB5,ADRA1D,S1PR3,PLCB4,DUSP9,PRKAR2B,LPAR1,DUSP1,PDE1B,PRKAG2,S1PR1,PDE5A,PIK3CD,PTGER2,ADCY10
mTOR Signaling	1.46	0.129	TSC1,PIK3R1,PDPK1,PIK3R4,EIF4EBP1,VEGFA,HMOX1,EIF4G2,RHOB,PPM1J,GPLD1,RHOU,PRKAA1,AKT1S1,RPS24,RHEB,PRKCQ,DDIT4,PPP2R5D,FGFR2,PPP2R5A,PLD4,RHOQ,RND3,PRKAG2,PIK3CD
NRF2-mediated Oxidative Stress Response	1.43	0.13	AKR7A2,MAP2K4,MAP2K6,PIK3R1,DNAJA1,PIK3R4,HMOX1,JUN,KEAP1,VCP,DNAJB1,NFE2L2,DNAJC16,PRKCQ,FGFR2,HERPUD1,DNAJC1,MAFF,DNAJC21,DNAJC5,CAT,PIK3CD,MAPK7,MAP2K5,DNAJB5
Role of NFAT in Cardiac Hypertrophy	1.43	0.13	MAP2K6,MAP2K4,PLCB2,PIK3R1,NOTUM,PIK3R4,PLCH2,PLCE1,PRKAR1B,TGFB2,PRKCQ,HDAC1,GNAI1,FGFR2,SLC8A2,PPP3CC,CALM1 (includes others),RCAN1,PLCB4,PRKAR2B,PRKAG2,PIK3CD,ADCY10,RCAN2,IL11
Ephrin A Signaling	1.42	0.167	EPHA7,FYN,EPHA8,PIK3R1,NGFR,FGFR2,EPHA4,PIK3CD,PIK3R4,EFNA1
Docosahexaenoic Acid (DHA) Signaling	1.41	0.173	BCL2L1,CASP3,PIK3R1,BIK,PDPK1,FGFR2,GSK3A,PIK3CD,PIK3R4
Dopamine Receptor Signaling	1.41	0.156	GCH1,PRKAR2B,PPP1R10,SMOX,PPP2R5D,PPM1J,PRKAG2,PRKAR1B,ADCY10,PPP2R5A,MAOA,CALY
Heme Biosynthesis II	1.4	0.333	FECH,ALAD,CPOX
Relaxin Signaling	1.4	0.134	PDE2A,PDE7A,GUCY1A3,PIK3R1,GNA12,GNAI1,FGFR2,PIK3R4,VEGFA,JUN,PRKAR2B,PDE3B,NPR1,PDE1B,PRKAR1B,PRKAG2,PDE5A,PIK3CD,ADCY10,APEX1,GUCY1B3
Gap Junction Signaling	1.38	0.128	PLCB2,CSNK1G1,PIK3R1,NOTUM,PLCH2,PIK3R4,PLCE1,PRKAR1B,GUCY1B3,PRKCQ,GUCY1A3,GRIK3,GNAI1,FGFR2,PPP3CC,PLCB4,PRKAR2B,NOV,LPAR1,NPR1,PRKAG2,PIK3CD,MAPK7,ADCY10,MAP2K5
3-phosphoinositide Degradation	1.38	0.133	PPFIA1,PLPP7,DUSP8,PPP2R5D,PPTC7,PPP4R1,STYX,PPM1K,PTPN12,PTPRM,PPP2R5A,DUSP5,PTPRH,INPP5F,DUSP1,PTPRO,DUSP10,PPM1H,MTMR7,INPP5K,CDC25A
Heme Biosynthesis from Uroporphyrinogen-III I	1.37	0.5	FECH,CPOX
Melatonin Degradation II	1.37	0.5	SMOX,MAOA
Arginine Degradation I (Arginase Pathway)	1.37	0.5	ALDH4A1,ARG2
Molybdenum Cofactor Biosynthesis	1.37	0.5	NFS1,MOCS3
Fatty Acid β-oxidation III (Unsaturated, Odd Number)	1.37	0.5	ECI2,EHHADH
Cell Cycle Regulation by BTG Family Proteins	1.37	0.189	CCNE1,PPP2R5D,PPM1J,BTG2,CCND1,E2F8,PPP2R5A
Ethanol Degradation II	1.37	0.189	ALDH4A1,ALDH1B1,ACSS3,ALDH1A3,ALDH3A2,ALDH1A2,ALDH9A1
Cellular Effects of Sildenafil (Viagra)	1.37	0.137	PDE2A,PLCB2,GUCY1A3,NOTUM,CACNA1C,PLCH2,CALM1 (includes others),PLCB4,PRKAR2B,PLCE1,PDE3B,PDE1B,PRKAR1B,PRKAG2,PDE5A,ADCY10,GUCY1B3,MYL12A
Synaptic Long Term Potentiation	1.37	0.139	GRIN1,PLCB2,PRKCQ,NOTUM,CACNA1C,RAPGEF3,GRM4,PPP3CC,PLCH2,CREB5,CALM1 (includes others),PLCB4,PRKAR2B,PLCE1,PPP1R10,PRKAR1B,PRKAG2
HIPPO signaling	1.35	0.149	YWHAQ,SAV1,PPP1R10,AJUBA,PPP2R5D,PPM1J,CUL1,DLG2,DLG4,TEAD3,STK3,PPP2R5A,SKP2
Sumoylation Pathway	1.35	0.146	MAP2K4,CDH1,RHOQ,JUN,RND3,RHOB,KDM1A,HDAC1,RHOU,MYB,SENP7,MDM2,RPA1,ISG20
p70S6K Signaling	1.34	0.136	PLCB2,PRKCQ,F2R,PPP2R5D,PIK3R1,NOTUM,GNAI1,FGFR2,PDPK1,PLCH2,PIK3R4,PPP2R5A,YWHAQ,PLCB4,PLCE1,PPM1J,SYK,PIK3CD
Glioma Signaling	1.34	0.14	PRKCQ,TFDP1,PIK3R1,FGFR2,MDM2,PIK3R4,CCND1,PDGFB,IDH1,CALM1 (includes others),IGF2,CDKN1A,TGFA,PIK3CD,PDGFD,E2F8
Sonic Hedgehog Signaling	1.34	0.2	PRKAR2B,GLIS1,SUFU,PRKAG2,PRKAR1B,HHIP
Phospholipases	1.33	0.161	PLD4,HMOX1,PLCB4,PLCB2,PLCE1,PLA2G10,GPLD1,NOTUM,PNPLA3,PLCH2
Bladder Cancer Signaling	1.32	0.148	MYC,VEGFA,CDH1,DAPK1,TFDP1,FGF18,FGF9,MMP15,CDKN1A,MDM2,CCND1,FGF19,FGF5
Chondroitin Sulfate Degradation (Metazoa)	1.32	0.25	HYAL2,GM2A,HEXB,CEMIP
UVA-Induced MAPK Signaling	1.31	0.142	MAP2K4,BCL2L1,PLCB4,PLCB2,PLCE1,JUN,CASP3,PIK3R1,PARP2,NOTUM,FGFR2,PIK3CD,PARP12,PLCH2,PIK3R4
IGF-1 Signaling	1.31	0.142	CTGF,PIK3R1,PDPK1,FGFR2,IGFBP5,PIK3R4,GRB10,YWHAQ,JUN,PRKAR2B,NOV,PRKAR1B,PRKAG2,PIK3CD,CYR61
Adipogenesis pathway	1.29	0.134	PPARG,ARNTL,ATG7,TNFRSF1A,HDAC1,XBP1,RBBP7,FGFR2,GTF2H2,FBXW7,FZD1,SLC2A4,KAT6B,RUNX1T1,LPIN1,KDM1A,SOX9,WNT5A
ATM Signaling	1.28	0.143	MAP2K4,GADD45B,JUN,GADD45A,PPP2R5D,PPM1J,CDKN1A,MDM2,TDP1,TLK2,CREB5,PPP2R5A,CDC25A,PPM1D
Basal Cell Carcinoma Signaling	1.27	0.153	WNT3A,WNT9B,GLIS1,SUFU,BMP3,WNT16,HHIP,FZD1,BMP6,WNT8B,WNT5A
nNOS Signaling in Neurons	1.27	0.17	GRIN1,CALM1 (includes others),PRKCQ,DLG2,DLG4,CAPN2,PPP3CC,PFKM
Macropinocytosis Signaling	1.26	0.148	ITGB2,PRKCQ,PIK3R1,ITGA5,FGFR2,PIK3CD,ITGB4,NGF,PIK3R4,PDGFD,PDGFB,ITGB3
CDK5 Signaling	1.25	0.141	CABLES1,PPP2R5D,NGF,PPP2R5A,ITGA3,PRKAR2B,PPP1R10,PPM1J,NGFR,PRKAR1B,LAMB1,PRKAG2,MAPK7,ADCY10
Dermatan Sulfate Degradation (Metazoa)	1.23	0.235	HYAL2,GM2A,HEXB,CEMIP
Sirtuin Signaling Pathway	1.2	0.117	FOXO4,GADD45B,ARG2,NDUFA4L2,MYC,ATG4C,JUN,GADD45A,GABARAPL1,ZBTB14,PRKAA1,ATG4A,NDUFS2,NDUFA10,UQCRFS1,NAMPT,GOT2,NFE2L2,APEX1,POLR1D,PPARG,SDHA,ARNTL,ATG7,PPIF,POLR1E,SDHC,ACLY,PFKM,CDH1,ATP5B,MAPK7,ATG101,XRCC5
PTEN Signaling	1.2	0.134	FOXO4,CASP3,PIK3R1,ITGA5,FGFR2,PDPK1,GSK3A,BMPR1B,CCND1,BCL2L1,ITGA3,INPP5F,NGFR,CDKN1A,PIK3CD,INPP5K
Cholecystokinin/Gastrin-mediated Signaling	1.19	0.139	MAP2K4,MAP2K6,PLCB2,PRKCQ,GNA12,EPHA4,PLCB4,JUN,RHOQ,RND3,RHOB,RHOU,MAPK7,MAP2K5
Role of Macrophages, Fibroblasts and Endothelial Cells in Rheumatoid Arthritis	1.18	0.115	MAP2K6,MAP2K4,PLCB2,PIK3R1,NOTUM,WNT16,FZD1,PLCH2,PIK3R4,CCND1,FCGR1A,WNT8B,CEBPG,MYC,VEGFA,PLCE1,JUN,TRAF3IP2,NGFR,LTBR,PRKCQ,WNT9B,TNFRSF1A,MYD88,FGFR2,PPP3CC,CREB5,PDGFB,CALM1 (includes others),PLCB4,RIPK1,WNT3A,PIK3CD,SFRP1,PDGFD,WNT5A
2-ketoglutarate Dehydrogenase Complex	1.18	0.4	DLST,OGDH
Tetrahydrofolate Salvage from 5,10-methenyltetrahydrofolate	1.18	0.4	MTHFD2,MTHFD1
dTMP De Novo Biosynthesis	1.18	0.4	DHFR,SHMT2
Folate Polyglutamylation	1.18	0.4	MTHFD1,SHMT2
Assembly of RNA Polymerase I Complex	1.17	0.273	POLR1D,POLR1E,UBTF
UDP-N-acetyl-D-galactosamine Biosynthesis II	1.17	0.273	GPI,GNPDA1,UAP1
Hypoxia Signaling in the Cardiovascular System	1.17	0.147	VEGFA,UBE2D4,UBE2L3,JUN,UBE2J1,UBE2H,HIF1AN,MDM2,UBE2W,CREB5,SLC2A4
D-myo-inositol (1,4,5)-trisphosphate Degradation	1.15	0.222	INPP1,INPP5F,INPP5K,PMPCA
PI3K Signaling in B Lymphocytes	1.15	0.131	FYN,PLCB2,ATF3,PIK3R1,NOTUM,PDPK1,PPP3CC,PLCH2,CALM1 (includes others),PLCB4,JUN,PLCE1,BCL10,SYK,PIK3CD,PLEKHA1,CR2
14-3-3-mediated Signaling	1.13	0.13	MAP2K4,TSC1,PLCB2,PRKCQ,TNFRSF1A,PIK3R1,NOTUM,FGFR2,GSK3A,PLCH2,PIK3R4,YWHAQ,PLCB4,JUN,PLCE1,PIK3CD,AKT1S1
Salvage Pathways of Pyrimidine Ribonucleotides	1.1	0.137	MAP2K6,PYCR3,UPRT,MAP2K4,DAPK1,PRKCQ,PIM1,UPP1,PRKAA1,AK4,PLK1,MAPK7,AK7
GPCR-Mediated Nutrient Sensing in Enteroendocrine Cells	1.1	0.14	PLCB4,PLCB2,PLCE1,PRKCQ,PRKAR2B,NOTUM,PRKAG2,PRKAR1B,GNAI1,ADCY10,PLCH2,PYY
Gαq Signaling	1.09	0.124	PLCB2,PRKCQ,PIK3R1,FGFR2,PPP3CC,PIK3R4,AVPR1A,ADRA1D,PLD4,HMOX1,CALM1 (includes others),PLCB4,GYS1,RHOQ,RND3,RHOB,GPLD1,RHOU,PIK3CD,ADRA1B
Integrin Signaling	1.09	0.119	MAP2K4,FYN,RALA,TSPAN7,PIK3R1,PIK3R4,ITGB3,ITGA3,RHOB,RHOU,ITGB4,MYL12A,ITGAD,PARVA,ITGA5,TSPAN2,FGFR2,PDGFB,ITGB2,RHOQ,RND3,ARF3,TSPAN1,PIK3CD,CAPN2,ITGA7
RAR Activation	1.09	0.121	MAP2K4,PRKCQ,DPF1,RDH10,PIK3R1,PDPK1,GTF2H2,RARG,VEGFA,TRIM24,JUN,PRKAR2B,ALDH1A3,DUSP1,ALDH1A2,PRKAR1B,TGFB2,PRKAG2,PIK3CD,RXRA,ADCY10,CITED2,PHF10
BER pathway	1.07	0.25	POLG,FEN1,APEX1
TGF-β Signaling	1.07	0.138	MAP2K6,MAP2K4,JUN,RUNX2,RNF111,HDAC1,ACVR1,TGFB2,BMPR1B,INHBC,INHBA,PMEPA1
Protein Kinase A Signaling	1.07	0.11	PLCB2,DUSP8,PDE7A,NOTUM,GSK3A,PLCH2,PTPN12,YWHAQ,DUSP5,GYS1,PLCE1,DUSP3,PPP1R10,PTPRO,PDE3B,DUSP26,NGFR,DUSP10,TGFB2,PRKAR1B,APEX1,MYL12A,CDC25A,PDE2A,PRKCQ,GNAI1,TNNI3,PPP3CC,CREB5,PTPRM,PTPDC1,CALM1 (includes others),PLCB4,PTPRH,DUSP9,PRKAR2B,DUSP1,PDE1B,PRKAG2,ANAPC5,PDE5A,ADCY10,PTPN21,AKAP1
GP6 Signaling Pathway	1.06	0.127	FYN,PRKCQ,COL6A2,PIK3R1,COL12A1,PDPK1,FGFR2,GSK3A,PIK3R4,LAMC2,ITGB3,LAMB2,CALM1 (includes others),LAMA4,SYK,LAMB1,PIK3CD
Methylthiopropionate Biosynthesis	1.05	1	ADI1
Thio-molybdenum Cofactor Biosynthesis	1.05	1	MOCOS
Acetyl-CoA Biosynthesis III (from Citrate)	1.05	1	ACLY
Thiamin Salvage III	1.05	1	TPK1
Glutamine Biosynthesis I	1.05	1	GLUL
L-cysteine Degradation II	1.05	1	CTH
Asparagine Biosynthesis I	1.05	1	ASNS
Lanosterol Biosynthesis	1.05	1	LSS
Alanine Biosynthesis III	1.05	1	NFS1
Ovarian Cancer Signaling	1.05	0.125	TFDP1,WNT9B,FGF9,PIK3R1,FGFR2,WNT16,FZD1,PIK3R4,WNT8B,CCND1,VEGFA,WNT3A,PRKAR2B,MSH2,PRKAR1B,PRKAG2,PIK3CD,WNT5A
Urea Cycle	1.03	0.333	ASS1,ARG2
Arginine Degradation VI (Arginase 2 Pathway)	1.03	0.333	PYCR3,ARG2
UDP-N-acetyl-D-glucosamine Biosynthesis II	1.03	0.333	UAP1,GFPT2
Zymosterol Biosynthesis	1.03	0.333	NSDHL,HSD17B7
PDGF Signaling	0.987	0.133	MAP2K4,MYC,JUN,INPP5F,PIK3R1,SPHK2,FGFR2,PIK3CD,INPP5K,PIK3R4,PDGFD,PDGFB
Protein Ubiquitination Pathway	0.983	0.113	HSPA14,CDC20,UBE3B,DNAJC12,CUL1,FBXW7,UBE2W,USP2,DNAJA1,UBE2D4,USP3,BAG1,DNAJB1,NEDD4L,DNAJC16,MED20,UBE4B,HSPA9,MDM2,DNAJC1,SKP2,DNAJC21,UBE2L3,DNAJC5,UBE2J1,UBE2H,ANAPC5,UBA1,USP25,DNAJB5
IL-7 Signaling Pathway	0.96	0.132	MYC,FOXO4,FYN,JUN,PIK3R1,PDPK1,FGFR2,GSK3A,PIK3CD,PIK3R4,CCND1,CDC25A
Melanoma Signaling	0.946	0.145	CDH1,PIK3R1,CDKN1A,FGFR2,MDM2,PIK3CD,PIK3R4,CCND1
Reelin Signaling in Neurons	0.934	0.13	MAP2K4,ITGB2,FYN,ITGA3,PIK3R1,ITGA5,FGFR2,LRP8,ARHGEF2,PIK3CD,PIK3R4,ITGB3
Telomerase Signaling	0.931	0.126	PIK3R1,PPP2R5D,HDAC1,FGFR2,PDPK1,PIK3R4,PPP2R5A,ELF1,MYC,PPM1J,CDKN1A,TPP1,PIK3CD,TERF1
Cardiac β-adrenergic Signaling	0.927	0.121	PDE2A,PDE7A,PPP2R5D,CACNA1C,SLC8A2,PPP2R5A,PRKAR2B,PPP1R10,PDE3B,PPM1J,PDE1B,PRKAR1B,PRKAG2,PDE5A,ADCY10,APEX1,AKAP1
Regulation of the Epithelial-Mesenchymal Transition Pathway	0.925	0.116	MAP2K6,MAP2K4,SNAI2,WNT9B,FGF9,PIK3R1,FGFR2,WNT16,FZD1,PIK3R4,WNT8B,CDH1,WNT3A,FGF18,APH1A,TGFB2,PIK3CD,PDGFD,MAP2K5,FGF5,WNT5A,FGF19
Hepatic Cholestasis	0.916	0.119	MAP2K4,SLC4A2,IL12A,PRKCQ,MYD88,TNFRSF1A,IL17B,JUN,PRKAR2B,IL17D,NGFR,PRKAR1B,TGFB2,PRKAG2,RXRA,ADCY10,TIRAP,IL11,FGF19
Xenobiotic Metabolism Signaling	0.912	0.11	MAP2K6,MAP2K4,ALDH4A1,PIK3R1,CES2,PIK3R4,HMOX1,ALDH1A3,KEAP1,ALDH3A2,PPM1J,HS6ST2,CHST11,CHST10,NFE2L2,CITED2,ALDH1B1,CYP1A1,PRKCQ,PPP2R5D,FGFR2,PPP2R5A,ALDH9A1,CHST1,SMOX,CAT,ALDH1A2,PIK3CD,MAPK7,RXRA,MAP2K5,MAOA
Acute Myeloid Leukemia Signaling	0.909	0.129	MAP2K6,MAP2K4,MYC,PIM1,PIK3R1,FGFR2,PIK3CD,PIK3R4,CCND1,MAP2K5,EIF4EBP1,IDH1
Superpathway of Serine and Glycine Biosynthesis I	0.908	0.286	DUSP26,SHMT2
Aspartate Degradation II	0.908	0.286	MDH2,GOT2
Polyamine Regulation in Colon Cancer	0.896	0.182	PPARG,MYC,MXD1,OAZ3
Corticotropin Releasing Hormone Signaling	0.886	0.124	CRHR2,PRKCQ,GUCY1A3,GNAI1,CREB5,VEGFA,CALM1 (includes others),JUN,PRKAR2B,NPR1,PRKAR1B,PRKAG2,ADCY10,GUCY1B3
Paxillin Signaling	0.886	0.124	MAP2K4,ITGAD,PARVA,PIK3R1,ITGA5,FGFR2,PIK3R4,PTPN12,ITGB3,ITGB2,ITGA3,PIK3CD,ITGB4,ITGA7
Role of Tissue Factor in Cancer	0.878	0.122	FYN,CTGF,CASP3,GNA12,PIK3R1,FGFR2,HBEGF,PIK3R4,ITGB3,VEGFA,BCL2L1,ITGA3,PIK3CD,CYR61,FGF5
Small Cell Lung Cancer Signaling	0.873	0.129	MYC,BCL2L1,CCNE1,TFDP1,PIK3R1,FGFR2,PIK3CD,RXRA,PIK3R4,CCND1,SKP2
BMP signaling pathway	0.863	0.132	MAP2K4,FST,PRKAR2B,JUN,RUNX2,BMP3,PRKAG2,PRKAR1B,BMPR1B,BMP6
nNOS Signaling in Skeletal Muscle Cells	0.842	0.2	SNTB2,CALM1 (includes others),DAG1
Glutaryl-CoA Degradation	0.842	0.2	ACAT1,EHHADH,HADH
Non-Small Cell Lung Cancer Signaling	0.836	0.13	TFDP1,PIK3R1,TGFA,PDPK1,FGFR2,PIK3CD,RASSF5,RXRA,PIK3R4,CCND1
Chronic Myeloid Leukemia Signaling	0.827	0.123	TFDP1,PIK3R1,HDAC1,FGFR2,MDM2,PIK3R4,CCND1,MYC,BCL2L1,CDKN1A,TGFB2,PIK3CD,E2F8
NF-κB Activation by Viruses	0.823	0.126	ITGB2,ITGA3,RIPK1,PRKCQ,PIK3R1,ITGA5,FGFR2,PIK3CD,PIK3R4,ITGB3,CR2
Fatty Acid β-oxidation I	0.819	0.156	ECI2,IVD,EHHADH,SLC27A4,HADH
tRNA Splicing	0.812	0.146	PDE2A,PDE7A,PDE3B,PDE1B,PDE5A,APEX1
Estrogen-Dependent Breast Cancer Signaling	0.81	0.128	JUN,PIK3R1,HSD17B7,FGFR2,AKR1B15,PIK3CD,PIK3R4,CREB5,CCND1,HSD17B14
Superoxide Radicals Degradation	0.809	0.25	CAT,CYGB
CREB Signaling in Neurons	0.808	0.113	GRIN1,PLCB2,PRKCQ,GNA12,PIK3R1,GRIK3,NOTUM,GNAI1,FGFR2,GRM4,PLCH2,CREB5,PIK3R4,CALM1 (includes others),PLCB4,PRKAR2B,PLCE1,PRKAR1B,PRKAG2,PIK3CD,ADCY10
Rac Signaling	0.8	0.12	MAP2K4,PIK3R1,ITGA5,FGFR2,PIP4K2B,PIK3R4,IQGAP2,ITGA3,PIP5K1A,JUN,PIP5KL1,PIK3CD,ELK4,IQGAP3
cAMP-mediated signaling	0.799	0.11	PDE7A,PDE3B,PRKAR1B,ADORA1,APEX1,PTGER4,ADRB2,PDE2A,GNAI1,RAPGEF3,PPP3CC,GRM4,CREB5,S1PR3,CALM1 (includes others),PRKAR2B,DUSP9,LPAR1,DUSP1,PDE1B,S1PR1,PDE5A,PTGER2,ADCY10,AKAP1
ErbB2-ErbB3 Signaling	0.799	0.13	MYC,JUN,PIK3R1,PDPK1,FGFR2,GSK3A,PIK3CD,PIK3R4,CCND1
Superpathway of D-myo-inositol (1,4,5)-trisphosphate Metabolism	0.794	0.167	INPP1,INPP5F,INPP5K,PMPCA
ErbB Signaling	0.791	0.122	MAP2K6,MAP2K4,PRKCQ,JUN,PIK3R1,TGFA,PDPK1,HBEGF,FGFR2,PIK3CD,PIK3R4,AREG
Antioxidant Action of Vitamin C	0.785	0.12	MAP2K4,PLD4,HMOX1,PLCB4,PLCB2,PLCE1,PLA2G10,GPLD1,NOTUM,PNPLA3,PLCH2,SLC2A4,SLC2A3
Granzyme B Signaling	0.78	0.188	CASP3,DFFB,LMNB1
Mismatch Repair in Eukaryotes	0.78	0.188	MSH2,RPA1,FEN1
Parkinson's Signaling	0.78	0.188	SEPT5,CASP3,SNCAIP
Synaptic Long Term Depression	0.775	0.115	PLCB2,PRKCQ,GUCY1A3,PPP2R5D,PLA2G10,GNA12,NOTUM,GNAI1,GRM4,PLCH2,PPP2R5A,PLCB4,PLCE1,PPM1J,NPR1,PNPLA3,GUCY1B3
Asparagine Degradation I	0.769	0.5	ASRGL1
Epoxysqualene Biosynthesis	0.769	0.5	FDFT1
β-alanine Degradation I	0.769	0.5	ABAT
Spermine Biosynthesis	0.769	0.5	SMS
L-DOPA Degradation	0.769	0.5	LRTOMT
Alanine Degradation III	0.769	0.5	GPT2
Alanine Biosynthesis II	0.769	0.5	GPT2
Palmitate Biosynthesis I (Animals)	0.769	0.5	OXSM
Uridine-5'-phosphate Biosynthesis	0.769	0.5	UMPS
Anandamide Degradation	0.769	0.5	FAAH2
Fatty Acid Biosynthesis Initiation II	0.769	0.5	OXSM
Glycine Degradation (Creatine Biosynthesis)	0.769	0.5	GATM
Cysteine Biosynthesis/Homocysteine Degradation	0.769	0.5	CTH
Glycine Biosynthesis I	0.769	0.5	SHMT2
Glutamate Dependent Acid Resistance	0.769	0.5	GAD1
T Cell Receptor Signaling	0.764	0.119	MAP2K4,FYN,CALM1 (includes others),PTPRH,PRKCQ,JUN,BCL10,PIK3R1,FGFR2,PIK3CD,PPP3CC,CD8A,PIK3R4
Clathrin-mediated Endocytosis Signaling	0.763	0.111	F2R,PICALM,FGF9,PIK3R1,ITGA5,FGFR2,MDM2,PPP3CC,PIK3R4,PDGFB,ITGB3,VEGFA,ITGB2,LDLR,FGF18,PIK3CD,ITGB4,PDGFD,SH3KBP1,CLU,FGF5,FGF19
Induction of Apoptosis by HIV1	0.76	0.131	MAP2K4,BCL2L1,SLC25A13,RIPK1,CASP3,TNFRSF1A,NGFR,DFFB
PCP pathway	0.76	0.131	MAP2K4,WNT3A,JUN,WNT9B,WNT16,FZD1,WNT8B,WNT5A
Caveolar-mediated Endocytosis Signaling	0.747	0.127	ITGAD,ITGB2,FYN,ITGA3,FLOT2,ITGA5,ITGB4,ITGA7,ITGB3
Phospholipase C Signaling	0.747	0.108	FYN,PLCB2,RALA,PLA2G10,TGM2,HMOX1,ITGA3,PLCE1,RHOB,GPLD1,RHOU,ARHGEF2,MYL12A,PRKCQ,HDAC1,ITGA5,RAPGEF3,PPP3CC,CREB5,PLD4,CALM1 (includes others),PLCB4,RHOQ,RND3,SYK,ADCY10
Calcium Signaling	0.744	0.111	GRIN1,ATP2C1,TNNC2,TNNC1,HDAC1,TNNI3,CHRNB4,SLC8A2,TRPC4,PPP3CC,CREB5,CALM1 (includes others),RCAN1,PRKAR2B,ATP2B3,CASQ1,PRKAR1B,PRKAG2,TPM4,RCAN2
Stearate Biosynthesis I (Animals)	0.743	0.14	LIPT2,SRD5A3,DHCR24,GNPAT,ACOT9,SLC27A4
Role of p14/p19ARF in Tumor Suppression	0.743	0.14	PIK3R1,FGFR2,MDM2,PIK3CD,PIK3R4,UBTF
Circadian Rhythm Signaling	0.74	0.147	GRIN1,PER1,ARNTL,CRY1,CREB5
DNA Methylation and Transcriptional Repression Signaling	0.74	0.147	HIST1H4K,HDAC1,RBBP7,ARID4B,HIST2H4A
Retinoic acid Mediated Apoptosis Signaling	0.733	0.129	CASP3,TNFRSF10B,PARP2,TNFRSF10C,TNFRSF10D,PARP12,RXRA,RARG
autophagy	0.733	0.129	CTSD,ATG4C,VPS18,ATG7,VPS33A,LAMP1,ATG4A,PIK3R4
Androgen Signaling	0.724	0.117	CALM1 (includes others),PRKCQ,PRKAR2B,JUN,SHBG,GNA12,PRKAR1B,PRKAG2,GNAI1,GTF2H2,GTF2E2,DNAJB1,CCND1
FcγRIIB Signaling in B Lymphocytes	0.721	0.132	MAP2K4,PIK3R1,SYK,PDPK1,FGFR2,PIK3CD,PIK3R4
Semaphorin Signaling in Neurons	0.721	0.132	FYN,RHOQ,RND3,RHOB,RHOU,ARHGAP1,NRP1
Role of Osteoblasts, Osteoclasts and Chondrocytes in Rheumatoid Arthritis	0.716	0.107	MAP2K4,MAP2K6,BMP3,PIK3R1,WNT16,FZD1,PIK3R4,WNT8B,ITGB3,ITGA3,JUN,RUNX2,NGFR,WNT9B,TNFRSF1A,FGFR2,ITGA5,PPP3CC,CALM1 (includes others),WNT3A,PIK3CD,SFRP1,BMP6,IL11,WNT5A
Heparan Sulfate Biosynthesis	0.714	0.122	CHST1,B3GALT6,TARS2,NOTUM,CHST11,HS6ST2,EXT1,CHST10,CES2,EXTL1
IL-1 Signaling	0.709	0.12	MAP2K6,MAP2K4,TOLLIP,PRKAR2B,JUN,MYD88,GNA12,PRKAG2,PRKAR1B,GNAI1,ADCY10
Wnt/Ca+ pathway	0.707	0.127	PLCB4,PLCB2,PLCE1,NOTUM,FZD1,PLCH2,CREB5,WNT5A
Gluconeogenesis I	0.705	0.154	GPI,ENO2,ME1,MDH2
Coagulation System	0.704	0.143	BDKRB2,F8,F2R,PLAU,TFPI
TWEAK Signaling	0.704	0.143	RIPK1,CASP3,TNFSF12,BAG4,TNFRSF12A
Prolactin Signaling	0.692	0.12	MYC,FYN,PRKCQ,JUN,PIK3R1,PDPK1,FGFR2,NMI,PIK3CD,PIK3R4
Production of Nitric Oxide and Reactive Oxygen Species in Macrophages	0.688	0.108	MAP2K4,PRKCQ,TNFRSF1A,PPP2R5D,PIK3R1,FGFR2,ARG2,IFNGR1,PIK3R4,PPP2R5A,JUN,RHOQ,RND3,RHOB,PPP1R10,NGFR,PPM1J,CAT,RHOU,PIK3CD,CLU
Endometrial Cancer Signaling	0.681	0.125	MYC,CDH1,PIK3R1,PDPK1,FGFR2,PIK3CD,PIK3R4,CCND1
Valine Degradation I	0.672	0.167	ABAT,EHHADH,BCKDHB
SAPK/JNK Signaling	0.667	0.115	MAP2K4,MAP4K3,RIPK1,DUSP8,JUN,GADD45A,PIK3R1,GNA12,DUSP10,FGFR2,PIK3CD,PIK3R4
Pyridoxal 5'-phosphate Salvage Pathway	0.657	0.123	MAP2K6,MAP2K4,DAPK1,PRKCQ,PIM1,PRKAA1,PLK1,MAPK7
Neuroinflammation Signaling Pathway	0.655	0.103	MAP2K4,IL12A,GDNF,PIK3R1,PLA2G10,FZD1,NGF,PIK3R4,HMOX1,GABRB3,JUN,TGFB2,NFE2L2,GRIN1,CASP3,TNFRSF1A,MYD88,ACVR1,FGFR2,IFNGR1,PPP3CC,CREB5,GABRR2,RIPK1,KCNJ5,APH1A,GAD1,SYK,GLUL,PIK3CD,MAPK7,TIRAP
Th1 Pathway	0.654	0.111	MAP2K6,IL12A,PRKCQ,PIK3R1,FGFR2,IFNGR1,PIK3R4,CD8A,ITGB2,NFIL3,APH1A,IL10RA,PIK3CD,CD274,DLL4
Ketogenesis	0.653	0.2	ACAT1,HMGCS1
Calcium Transport I	0.653	0.2	ATP2C1,ATP2B3
Glycine Betaine Degradation	0.653	0.2	PIPOX,SHMT2
Heparan Sulfate Biosynthesis (Late Stages)	0.652	0.12	CHST1,TARS2,NOTUM,CHST11,HS6ST2,EXT1,CHST10,CES2,EXTL1
Cell Cycle Control of Chromosomal Replication	0.639	0.125	MCM6,ORC2,CDK17,DNA2,CDC7,RPA1,MCM4
Actin Nucleation by ARP-WASP Complex	0.639	0.125	ITGA3,RHOQ,RND3,RHOB,GNA12,RHOU,ITGA5
Tight Junction Signaling	0.633	0.108	YKT6,TNFRSF1A,PPP2R5D,VTI1B,PPP2R5A,JUN,PRKAR2B,CLDN4,NGFR,PPM1J,CGN,PRKAR1B,TGFB2,PRKAG2,CSTF2,STX16,ARHGEF2,GOSR2
ERK5 Signaling	0.633	0.121	MYC,YWHAQ,GNA12,MAPK7,NGF,CREB5,ELK4,MAP2K5
UVB-Induced MAPK Signaling	0.633	0.121	MAP2K4,PRKCQ,JUN,PIK3R1,FGFR2,PIK3CD,PIK3R4,EIF4EBP1
Antiproliferative Role of Somatostatin Receptor 2	0.63	0.118	SSTR2,GUCY1A3,PIK3R1,NPR1,CDKN1A,FGFR2,PIK3CD,PIK3R4,GUCY1B3
GDNF Family Ligand-Receptor Interactions	0.63	0.118	MAP2K4,JUN,GDNF,ARTN,PIK3R1,FGFR2,PIK3CD,RET,PIK3R4
Regulation of eIF4 and p70S6K Signaling	0.629	0.108	PPP2R5D,PIK3R1,ITGA5,FGFR2,PDPK1,PIK3R4,EIF2S2,PPP2R5A,EIF4EBP1,ITGA3,EIF1,EIF4G2,PPM1J,MKNK1,EIF2B5,PIK3CD,RPS24
1D-myo-inositol Hexakisphosphate Biosynthesis II (Mammalian)	0.625	0.158	INPP5F,INPP5K,PMPCA
D-myo-inositol (1,3,4)-trisphosphate Biosynthesis	0.625	0.158	INPP5F,INPP5K,PMPCA
Pyrimidine Ribonucleotides De Novo Biosynthesis	0.622	0.128	ENTPD4,AK4,RAD54L,ZRANB3,AK7,UMPS
Role of Pattern Recognition Receptors in Recognition of Bacteria and Viruses	0.621	0.109	MAP2K4,IL12A,PRKCQ,MYD88,PIK3R1,FGFR2,PIK3R4,IL17B,NOD2,IL17D,SYK,TGFB2,PIK3CD,RIPK2,IL11
Gustation Pathway	0.618	0.11	PLCB2,PDE2A,PDE7A,P2RX5,PRKAR2B,PDE3B,PDE1B,PRKAR1B,ASIC1,PRKAG2,PDE5A,ADCY10,SCNN1B,APEX1
L-carnitine Biosynthesis	0.612	0.333	ALDH9A1
5-aminoimidazole Ribonucleotide Biosynthesis I	0.612	0.333	PFAS
Proline Degradation	0.612	0.333	ALDH4A1
S-methyl-5-thio-α-D-ribose 1-phosphate Degradation	0.612	0.333	ADI1
Tetrahydrobiopterin Biosynthesis I	0.612	0.333	GCH1
Biotin-carboxyl Carrier Protein Assembly	0.612	0.333	ACACB
Thiosulfate Disproportionation III (Rhodanese)	0.612	0.333	MOCS3
Thyroid Hormone Biosynthesis	0.612	0.333	CTSD
Tetrahydrobiopterin Biosynthesis II	0.612	0.333	GCH1
Glutamate Degradation II	0.612	0.333	GOT2
Tyrosine Biosynthesis IV	0.612	0.333	PCBD2
N-acetylglucosamine Degradation I	0.612	0.333	GNPDA1
Aspartate Biosynthesis	0.612	0.333	GOT2
Lymphotoxin β Receptor Signaling	0.61	0.119	BCL2L1,CASP3,PIK3R1,PDPK1,FGFR2,PIK3CD,LTBR,PIK3R4
Phagosome Maturation	0.61	0.108	ATP6V0E2,VPS18,YKT6,ATP6V1C1,VPS33A,VTI1B,ATP6V0A1,CTSD,TUBD1,TUBE1,ATP6V0D1,LAMP1,STX16,VPS37A,GOSR2,ATP6V1G2
Prostate Cancer Signaling	0.61	0.113	CCNE1,TFDP1,PIK3R1,CDKN1A,PDPK1,FGFR2,MDM2,PIK3CD,PIK3R4,CREB5,CCND1
Notch Signaling	0.606	0.132	CNTN1,APH1A,MAML2,HEY2,DLL4
Type II Diabetes Mellitus Signaling	0.602	0.109	MAP2K4,PPARG,PRKCQ,TNFRSF1A,PIK3R1,FGFR2,PDPK1,PIK3R4,SLC2A4,SLC27A4,NGFR,PRKAA1,PRKAG2,PIK3CD
Osteoarthritis Pathway	0.6	0.104	PPARG,CASP3,DDIT4,TNFRSF1A,PTHLH,ITGA5,WNT16,FZD1,CREB5,WNT8B,VEGFA,S1PR3,ITGA3,WNT3A,FGF18,RUNX2,GLIS1,CASQ1,PRKAA1,PRKAG2,SOX9,NAMPT
HIF1α Signaling	0.598	0.11	VEGFA,EGLN1,JUN,PIK3R1,MMP15,FGFR2,MDM2,PIK3CD,MAPK7,PIK3R4,APEX1,SLC2A4,SLC2A3
TR/RXR Activation	0.592	0.112	LDLR,PDE3B,PIK3R1,FGFR2,MDM2,PIK3CD,STRBP,ME1,RXRA,PIK3R4,RCAN2
G Beta Gamma Signaling	0.59	0.114	PRKCQ,PRKAR2B,CAV2,KCNJ5,GNA12,PRKAG2,PRKAR1B,GNAI1,PDPK1,HBEGF
NF-κB Signaling	0.584	0.105	MAP2K6,AZI2,PRKCQ,MYD88,TNFRSF1A,PIK3R1,HDAC1,FGFR2,BMPR1B,NGF,PIK3R4,RIPK1,BCL10,NGFR,PELI1,TGFA,PIK3CD,LTBR,TIRAP
Fc Epsilon RI Signaling	0.582	0.109	MAP2K6,MAP2K4,FYN,PRKCQ,PLA2G10,PIK3R1,FGFR2,PDPK1,PIK3R4,INPP5F,SYK,PIK3CD,INPP5K
Neuroprotective Role of THOP1 in Alzheimer's Disease	0.582	0.109	MME,PRSS12,TAC1,ENDOU,KLK4,PREP,C1R,PRKAR2B,PRKAG2,PRKAR1B,TPP1,LONP1,HLA-E
Estrogen Biosynthesis	0.576	0.128	CYP1A1,CYP2U1,HSD17B7,AKR1B15,HSD17B14
CTLA4 Signaling in Cytotoxic T Lymphocytes	0.574	0.111	AP1S1,FYN,PIK3R1,PPP2R5D,PPM1J,SYK,FGFR2,PIK3CD,PIK3R4,CD8A,PPP2R5A
Nur77 Signaling in T Lymphocytes	0.567	0.119	CALM1 (includes others),CASP3,HDAC1,PPP3CC,MAPK7,RXRA,MAP2K5
Agrin Interactions at Neuromuscular Junction	0.567	0.116	MAP2K4,ITGB2,ITGA3,JUN,LAMB1,ITGA5,DAG1,ITGB3
Thrombin Signaling	0.558	0.103	PLCB2,PRKCQ,F2R,GNA12,PIK3R1,NOTUM,GNAI1,PDPK1,FGFR2,PLCH2,PIK3R4,PLCB4,PLCE1,RHOQ,RND3,RHOB,RHOU,ARHGEF2,PIK3CD,ADCY10,MYL12A
Regulation of Actin-based Motility by Rho	0.553	0.111	PIP5K1A,ITGA3,RHOQ,RND3,RHOB,RHOU,ITGA5,PIP5KL1,PIP4K2B,MYL12A
Breast Cancer Regulation by Stathmin1	0.546	0.102	PLCB2,PRKCQ,PPP2R5D,PIK3R1,GNAI1,FGFR2,PIK3R4,PPP2R5A,CALM1 (includes others),CCNE1,PLCB4,PRKAR2B,PPP1R10,PPM1J,CDKN1A,PRKAR1B,PRKAG2,ARHGEF2,PIK3CD,ADCY10,E2F8
Myc Mediated Apoptosis Signaling	0.546	0.114	MAP2K4,MYC,YWHAQ,CASP3,PIK3R1,FGFR2,PIK3CD,PIK3R4
PAK Signaling	0.54	0.109	MAP2K4,ITGA3,CASP3,PIK3R1,ITGA5,FGFR2,PIK3CD,PIK3R4,PDGFD,PDGFB,MYL12A
Acyl-CoA Hydrolysis	0.536	0.167	GNPAT,ACOT9
Renin-Angiotensin Signaling	0.535	0.107	MAP2K4,PRKCQ,PIK3R1,FGFR2,PIK3R4,JUN,PRKAR2B,SHC2,PRKAR1B,PRKAG2,PIK3CD,PTGER2,ADCY10
Role of NANOG in Mammalian Embryonic Stem Cell Pluripotency	0.535	0.107	WNT9B,BMP3,PIK3R1,FGFR2,WNT16,BMPR1B,FZD1,PIK3R4,WNT8B,WNT3A,PIK3CD,BMP6,WNT5A
FGF Signaling	0.535	0.11	MAP2K6,FGF18,FGF9,PIK3R1,FGFR2,PIK3CD,PIK3R4,CREB5,FGF19,FGF5
Virus Entry via Endocytic Pathways	0.523	0.108	ITGB2,FYN,ITGA3,PRKCQ,PIK3R1,ITGA5,FGFR2,PIK3CD,ITGB4,PIK3R4,ITGB3
Role of NFAT in Regulation of the Immune Response	0.521	0.102	FYN,PLCB2,PRKCQ,CSNK1G1,PIK3R1,GNA12,GNAI1,FGFR2,GSK3A,PPP3CC,PIK3R4,FCGR1A,CALM1 (includes others),RCAN1,PLCB4,JUN,SYK,PIK3CD,RCAN2
CXCR4 Signaling	0.52	0.103	MAP2K4,PLCB2,PRKCQ,GNA12,PIK3R1,GNAI1,FGFR2,PIK3R4,PLCB4,JUN,RHOQ,RND3,RHOB,RHOU,PIK3CD,ADCY10,MYL12A
GNRH Signaling	0.519	0.104	MAP2K6,MAP2K4,PLCB2,PRKCQ,GNAI1,HBEGF,CREB5,CALM1 (includes others),PLCB4,JUN,PRKAR2B,PRKAR1B,PRKAG2,MAPK7,ADCY10
Heme Degradation	0.506	0.25	HMOX1
PRPP Biosynthesis I	0.506	0.25	PRPS2
Branched-chain α-keto acid Dehydrogenase Complex	0.506	0.25	BCKDHB
Spermine and Spermidine Degradation I	0.506	0.25	SMOX
Phenylethylamine Degradation I	0.506	0.25	ALDH3A2
Methylmalonyl Pathway	0.506	0.25	PCCA
Proline Biosynthesis I	0.506	0.25	PYCR3
L-cysteine Degradation I	0.506	0.25	GOT2
N-acetylglucosamine Degradation II	0.506	0.25	GNPDA1
Phenylalanine Degradation I (Aerobic)	0.506	0.25	PCBD2
Acetate Conversion to Acetyl-CoA	0.506	0.25	ACSS3
GM-CSF Signaling	0.488	0.11	BCL2L1,PIM1,PIK3R1,FGFR2,PIK3CD,PPP3CC,PIK3R4,CCND1
HGF Signaling	0.484	0.104	MAP2K4,ITGA3,PRKCQ,JUN,PIK3R1,CDKN1A,ITGA5,FGFR2,PIK3CD,PIK3R4,CCND1,ELF1
LPS/IL-1 Mediated Inhibition of RXR Function	0.477	0.0991	MAP2K4,ALDH1B1,ALDH4A1,MYD88,TNFRSF1A,CES2,SLC27A4,ALDH9A1,CHST1,JUN,ALDH1A3,SMOX,ALDH3A2,NGFR,CAT,ALDH1A2,HS6ST2,CHST11,CHST10,RXRA,HMGCS1,MAOA
CD27 Signaling in Lymphocytes	0.477	0.113	MAP2K6,MAP2K4,BCL2L1,JUN,CASP3,MAP2K5
Phototransduction Pathway	0.477	0.113	RGS9,PRKAR2B,GUCY1A3,PRKAG2,PRKAR1B,GUCY1B3
STAT3 Pathway	0.47	0.108	MAP2K4,MYC,PIM1,NGFR,CDKN1A,FGFR2,BMPR1B,CDC25A
PPARα/RXRα Activation	0.468	0.1	MAP2K6,MAP2K4,PLCB2,NOTUM,ACVR1,PLCH2,PLCB4,CHD5,JUN,PRKAR2B,PLCE1,PRKAR1B,PRKAA1,TGFB2,PRKAG2,RXRA,GOT2,ADCY10
B Cell Receptor Signaling	0.465	0.0995	MAP2K6,MAP2K4,PRKCQ,PIK3R1,FGFR2,PDPK1,GSK3A,PPP3CC,CREB5,PIK3R4,BCL2L1,CALM1 (includes others),JUN,INPP5F,BCL10,SYK,PIK3CD,INPP5K,RASSF5
Tec Kinase Signaling	0.46	0.1	MAP2K4,FYN,PRKCQ,GNA12,PIK3R1,TNFRSF10B,GNAI1,ITGA5,FGFR2,PIK3R4,ITGA3,RHOQ,RND3,RHOB,TNFSF12,RHOU,PIK3CD
Transcriptional Regulatory Network in Embryonic Stem Cells	0.456	0.111	TRIM24,CDYL,HIST1H4K,L1CAM,OTX1,HIST2H4A
DNA Double-Strand Break Repair by Non-Homologous End Joining	0.445	0.143	DCLRE1C,XRCC5
Isoleucine Degradation I	0.445	0.143	ACAT1,EHHADH
Androgen Biosynthesis	0.445	0.143	SRD5A3,HSD17B14
γ-glutamyl Cycle	0.445	0.143	CHAC1,GGACT
PXR/RXR Activation	0.445	0.108	SCD,PRKAR2B,ALDH3A2,PRKAG2,PRKAR1B,CES2,RXRA
Thrombopoietin Signaling	0.445	0.108	MYC,PRKCQ,JUN,PIK3R1,FGFR2,PIK3CD,PIK3R4
Dendritic Cell Maturation	0.444	0.0984	MAP2K4,PLCB2,IL12A,MYD88,TNFRSF1A,PIK3R1,NOTUM,FGFR2,CD83,PLCH2,CREB5,PIK3R4,FCGR1A,PLCB4,PLCE1,FSCN1,NGFR,PIK3CD,LTBR
Tryptophan Degradation III (Eukaryotic)	0.44	0.125	ACAT1,EHHADH,HADH
Serotonin Degradation	0.436	0.105	ALDH4A1,ALDH1B1,ALDH1A3,SMOX,ALDH3A2,ALDH1A2,ALDH9A1,MAOA
α-Adrenergic Signaling	0.43	0.103	CALM1 (includes others),PRKCQ,GYS1,PRKAR2B,PRKAG2,PRKAR1B,GNAI1,SLC8A2,ADCY10
Protein Citrullination	0.428	0.2	PADI2
Serine Biosynthesis	0.428	0.2	DUSP26
Tetrapyrrole Biosynthesis II	0.428	0.2	ALAD
Myo-inositol Biosynthesis	0.428	0.2	INPP5F
Lysine Degradation V	0.428	0.2	PIPOX
2-oxobutanoate Degradation I	0.428	0.2	PCCA
Trans, trans-farnesyl Diphosphate Biosynthesis	0.428	0.2	IDI1
Citrulline-Nitric Oxide Cycle	0.428	0.2	ASS1
iNOS Signaling	0.428	0.111	CALM1 (includes others),JUN,MYD88,IFNGR1,HMGA1
Pyrimidine Ribonucleotides Interconversion	0.428	0.111	ENTPD4,AK4,RAD54L,ZRANB3,AK7
Germ Cell-Sertoli Cell Junction Signaling	0.427	0.0983	MAP2K6,MAP2K4,TNFRSF1A,PIK3R1,FGFR2,PDPK1,PIK3R4,CDH1,ITGA3,RHOQ,AGGF1,RND3,RHOB,KEAP1,RHOU,TGFB2,PIK3CD
Th1 and Th2 Activation Pathway	0.415	0.0973	MAP2K6,IL12A,PRKCQ,PIK3R1,ACVR1,FGFR2,IFNGR1,CD8A,PIK3R4,ITGB2,NFIL3,JUN,APH1A,S1PR1,IL10RA,PIK3CD,CD274,DLL4
FAK Signaling	0.411	0.101	FYN,ITGA3,PIK3R1,HMMR,ITGA5,PDPK1,FGFR2,CAPN2,PIK3CD,PIK3R4
Triacylglycerol Biosynthesis	0.407	0.109	LIPT2,LPIN1,PLPP3,GPAT3,AGPAT3
Telomere Extension by Telomerase	0.407	0.133	TERF1,XRCC5
Superpathway of Citrulline Metabolism	0.407	0.133	ASS1,ARG2
Ephrin Receptor Signaling	0.406	0.0971	EPHA7,FYN,GRIN1,GNA12,SH2D3C,GNAI1,ITGA5,EPHA4,CREB5,PDGFB,EFNA1,VEGFA,EFNB2,ITGA3,EPHA8,SDC2,PDGFD
CD28 Signaling in T Helper Cells	0.402	0.0985	MAP2K4,FYN,CALM1 (includes others),PRKCQ,JUN,BCL10,SYK,PIK3R1,PDPK1,FGFR2,PIK3CD,PPP3CC,PIK3R4
Chondroitin Sulfate Biosynthesis	0.399	0.105	CHST1,B3GALT6,CSGALNACT2,CHST11,HS6ST2,CHST10
Regulation of Cellular Mechanics by Calpain Protease	0.399	0.105	CCNA2,CCNE1,ITGA3,ITGA5,CAPN2,CCND1
Type I Diabetes Mellitus Signaling	0.394	0.0991	MAP2K6,MAP2K4,RIPK1,IL12A,CASP3,TNFRSF1A,MYD88,NGFR,GAD1,IFNGR1,HLA-E
CD40 Signaling	0.389	0.101	MAP2K6,MAP2K4,JUN,PIK3R1,FGFR2,PIK3CD,PIK3R4,MAP2K5
Hereditary Breast Cancer Signaling	0.389	0.0972	GADD45B,DPF1,PIK3R1,HDAC1,FGFR2,RPA1,PIK3R4,CCND1,PALB2,MSH2,GADD45A,CDKN1A,PIK3CD,PHF10
Glycolysis I	0.384	0.115	GPI,ENO2,PFKM
EIF2 Signaling	0.384	0.095	EIF2AK1,ATF3,PIK3R1,RPL17,PDPK1,FGFR2,RPL7L1,TRIB3,PIK3R4,CCND1,EIF2S2,VEGFA,MYC,WARS,EIF1,EIF4G2,PPP1R15A,NKX6-2,EIF2B5,PIK3CD,RPS24
Role of IL-17A in Arthritis	0.378	0.101	MAP2K6,MAP2K4,PIK3R1,FGFR2,PIK3CD,PIK3R4,CXCL6
Sertoli Cell-Sertoli Cell Junction Signaling	0.376	0.0955	MAP2K4,GUCY1A3,TNFRSF1A,ITGA5,GSK3A,CDH1,ITGA3,AGGF1,JUN,PRKAR2B,CLDN4,KEAP1,CGN,PRKAR1B,PRKAG2,ADCY10,GUCY1B3
Role of BRCA1 in DNA Damage Response	0.375	0.1	MSH2,GADD45A,DPF1,CDKN1A,PLK1,RPA1,E2F8,PHF10
Complement System	0.374	0.108	C1R,ITGB2,CD59,CR2
Vitamin-C Transport	0.373	0.125	SLC2A4,SLC2A3
RhoA Signaling	0.369	0.0968	SEPT5,RHPN2,PIP5K1A,RND3,LPAR1,ANLN,GNA12,CDC42EP3,PIP5KL1,PIP4K2B,ARHGAP1,MYL12A
IL-12 Signaling and Production in Macrophages	0.368	0.0959	PPARG,MAP2K4,IL12A,PRKCQ,MYD88,PIK3R1,FGFR2,IFNGR1,PIK3R4,JUN,TGFB2,PIK3CD,RXRA,CLU
Arginine Biosynthesis IV	0.368	0.167	ASS1
Proline Biosynthesis II (from Arginine)	0.368	0.167	PYCR3
Chondroitin and Dermatan Biosynthesis	0.368	0.167	CSGALNACT2
Glycine Cleavage Complex	0.368	0.167	GLDC
Glycogen Biosynthesis II (from UDP-D-Glucose)	0.368	0.167	GYS1
NAD Biosynthesis III	0.368	0.167	NAMPT
GDP-mannose Biosynthesis	0.368	0.167	GPI
Dermatan Sulfate Biosynthesis	0.365	0.102	CHST1,B3GALT6,CSGALNACT2,CHST11,HS6ST2,CHST10
Factors Promoting Cardiogenesis in Vertebrates	0.36	0.0978	NPPB,CCNE1,PRKCQ,BMP3,ACVR1,TGFB2,BMPR1B,FZD1,BMP6
Chondroitin Sulfate Biosynthesis (Late Stages)	0.351	0.102	CHST1,CSGALNACT2,CHST11,HS6ST2,CHST10
Fcγ Receptor-mediated Phagocytosis in Macrophages and Monocytes	0.347	0.0968	PLD4,HMOX1,FYN,PIP5K1A,PRKCQ,PIK3R1,SYK,GPLD1,FCGR1A
Death Receptor Signaling	0.347	0.0968	MAP2K4,RIPK1,CASP3,TNFSF12,TNFRSF1A,TNFRSF10B,PARP2,DFFB,PARP12
γ-linolenate Biosynthesis II (Animals)	0.342	0.118	SLC27A4,FADS1
Netrin Signaling	0.334	0.103	PRKAR2B,PRKAG2,PRKAR1B,PPP3CC
Renal Cell Carcinoma Signaling	0.334	0.0964	VEGFA,JUN,PIK3R1,TGFA,FGFR2,PIK3CD,PIK3R4,PDGFB
JAK/Stat Signaling	0.334	0.0964	BCL2L1,PIAS2,JUN,PIK3R1,CDKN1A,FGFR2,PIK3CD,PIK3R4
MSP-RON Signaling Pathway	0.334	0.0972	ITGB2,IL12A,PIK3R1,FGFR2,PIK3CD,PIK3R4,KLK4
ErbB4 Signaling	0.334	0.0972	PRKCQ,APH1A,PIK3R1,PDPK1,FGFR2,PIK3CD,PIK3R4
TNFR1 Signaling	0.333	0.1	MAP2K4,RIPK1,JUN,CASP3,TNFRSF1A
NAD Biosynthesis from 2-amino-3-carboxymuconate Semialdehyde	0.319	0.143	QPRT
Phosphatidylcholine Biosynthesis I	0.319	0.143	PHKA1
Acetyl-CoA Biosynthesis I (Pyruvate Dehydrogenase Complex)	0.319	0.143	DLAT
Glycoaminoglycan-protein Linkage Region Biosynthesis	0.319	0.143	B3GALT6
Amyloid Processing	0.317	0.098	PRKAR2B,APH1A,PRKAG2,PRKAR1B,CAPN2
IL-17 Signaling	0.309	0.0941	MAP2K6,MAP2K4,TRAF3IP2,JUN,PIK3R1,FGFR2,PIK3CD,PIK3R4
Growth Hormone Signaling	0.309	0.0941	IGF2,PRKCQ,PIK3R1,PDPK1,FGFR2,PIK3CD,PIK3R4,SLC2A4
Role of PKR in Interferon Induction and Antiviral Response	0.298	0.0976	MAP2K6,CASP3,TNFRSF1A,FCGR1A
Mechanisms of Viral Exit from Host Cells	0.298	0.0976	CHMP6,PRKCQ,LMNB1,CHMP3
Hepatic Fibrosis / Hepatic Stellate Cell Activation	0.298	0.0909	CTGF,COL6A2,TNFRSF1A,COL12A1,KLF6,FGFR2,IFNGR1,IGFBP5,IFNAR2,PDGFB,VEGFA,IGF2,NGFR,IL10RA,TGFA,TGFB2,PDGFD
Gαi Signaling	0.294	0.0917	S1PR3,RALA,PRKAR2B,LPAR1,S1PR1,PRKAG2,PRKAR1B,GNAI1,GRM4,ADORA1,ADCY10
p38 MAPK Signaling	0.294	0.0917	MAP2K6,MAP2K4,MYC,TNFRSF1A,DUSP1,PLA2G10,DUSP10,MKNK1,TGFB2,MAPKAPK5,CREB5
IL-2 Signaling	0.291	0.0938	JUN,PIK3R1,SYK,FGFR2,PIK3CD,PIK3R4
Melanocyte Development and Pigmentation Signaling	0.289	0.0918	PRKAR2B,PIK3R1,PRKAG2,PRKAR1B,FGFR2,PIK3CD,ADCY10,PIK3R4,CREB5
Ubiquinol-10 Biosynthesis (Eukaryotic)	0.288	0.105	GADL1,BCKDHB
Triacylglycerol Degradation	0.287	0.0943	TARS2,NOTUM,MGLL,PNPLA3,CES2
LPS-stimulated MAPK Signaling	0.286	0.092	MAP2K6,MAP2K4,PRKCQ,JUN,PIK3R1,FGFR2,PIK3CD,PIK3R4
PEDF Signaling	0.286	0.092	PPARG,BCL2L1,GDNF,PIK3R1,FGFR2,PIK3CD,NGF,PIK3R4
IL-15 Signaling	0.282	0.0921	BCL2L1,IL15RA,PIK3R1,SYK,FGFR2,PIK3CD,PIK3R4
Toll-like Receptor Signaling	0.282	0.0921	MAP2K6,MAP2K4,TOLLIP,IL12A,JUN,MYD88,TIRAP
Airway Pathology in Chronic Obstructive Pulmonary Disease	0.279	0.125	CELA2A
VEGF Family Ligand-Receptor Interactions	0.275	0.0909	VEGFA,PRKCQ,PIK3R1,PLA2G10,FGFR2,PIK3CD,PIK3R4,NRP1
Role of Wnt/GSK-3β Signaling in the Pathogenesis of Influenza	0.271	0.0909	WNT3A,CSNK1G1,WNT9B,WNT16,FZD1,WNT8B,WNT5A
Serotonin Receptor Signaling	0.266	0.093	GCH1,SMOX,ADCY10,MAOA
Cardiomyocyte Differentiation via BMP Receptors	0.265	0.1	NPPB,BMPR1B
Inflammasome pathway	0.265	0.1	NOD2,MYD88
Crosstalk between Dendritic Cells and Natural Killer Cells	0.264	0.0899	IL15RA,IL12A,MICB,FSCN1,CD83,LTBR,MICA,HLA-E
IL-17A Signaling in Airway Cells	0.259	0.0897	MAP2K4,TRAF3IP2,PIK3R1,FGFR2,PIK3CD,PIK3R4,CXCL6
Prostanoid Biosynthesis	0.245	0.111	PTGES
Citrulline Biosynthesis	0.245	0.111	ARG2
Leucine Degradation I	0.245	0.111	IVD
Endoplasmic Reticulum Stress Pathway	0.244	0.0952	CASP3,XBP1
Embryonic Stem Cell Differentiation into Cardiac Lineages	0.217	0.1	SP4
Ketolysis	0.217	0.1	ACAT1
Purine Nucleotides De Novo Biosynthesis II	0.192	0.0909	PFAS
Dolichyl-diphosphooligosaccharide Biosynthesis	0.192	0.0909	ALG1

## Sheet: Cluster-B-Pathway
Ingenuity Canonical Pathways	-log(p-value)	Ratio	Molecules
Leucine Degradation I	3.53	0.222	HMGCLL1,MCCC2
Methylmalonyl Pathway	1.94	0.25	PCCB
Wnt/β-catenin Signaling	1.86	0.0174	CD44,TLE1,SOX5
2-oxobutanoate Degradation I	1.84	0.2	PCCB
Galactose Degradation I (Leloir Pathway)	1.84	0.2	GALM
Sucrose Degradation V (Mammalian)	1.59	0.111	GALM
Ketogenesis	1.54	0.1	HMGCLL1
Glycine Betaine Degradation	1.54	0.1	DMGDH
Fatty Acid Activation	1.43	0.0769	ACSL3
nNOS Signaling in Skeletal Muscle Cells	1.37	0.0667	RYR3
Rac Signaling	1.34	0.0171	CD44,CYBB
γ-linolenate Biosynthesis II (Animals)	1.32	0.0588	ACSL3
Mitochondrial L-carnitine Shuttle Pathway	1.32	0.0588	ACSL3
Valine Degradation I	1.29	0.0556	HIBADH
Fatty Acid β-oxidation I	1.05	0.0312	ACSL3
Superpathway of Methionine Degradation	0.991	0.027	PCCB
Notch Signaling	0.98	0.0263	MAML3
Netrin Signaling	0.969	0.0256	RYR3
mTOR Signaling	0.937	0.00995	MAPKAP1,PRR5L
Stearate Biosynthesis I (Animals)	0.929	0.0233	ACSL3
Leukocyte Extravasation Signaling	0.902	0.00948	CD44,CYBB
Role of Oct4 in Mammalian Embryonic Stem Cell Pluripotency	0.902	0.0217	WWP2
Dermatan Sulfate Biosynthesis (Late Stages)	0.902	0.0217	HS6ST3
Chondroitin Sulfate Biosynthesis (Late Stages)	0.876	0.0204	HS6ST3
LPS/IL-1 Mediated Inhibition of RXR Function	0.867	0.00901	ACSL3,HS6ST3
Chondroitin Sulfate Biosynthesis	0.816	0.0175	HS6ST3
Glutamate Receptor Signaling	0.816	0.0175	HOMER1
Dermatan Sulfate Biosynthesis	0.802	0.0169	HS6ST3
Glioma Invasiveness Signaling	0.734	0.0143	CD44
Melatonin Signaling	0.723	0.0139	RORA
Heparan Sulfate Biosynthesis (Late Stages)	0.707	0.0133	HS6ST3
Non-Small Cell Lung Cancer Signaling	0.697	0.013	FHIT
Heparan Sulfate Biosynthesis	0.673	0.0122	HS6ST3
Small Cell Lung Cancer Signaling	0.659	0.0118	FHIT
HIPPO signaling	0.65	0.0115	CD44
Gαs Signaling	0.562	0.00909	RYR3
p53 Signaling	0.558	0.00901	STAG1
fMLP Signaling in Neutrophils	0.521	0.00813	CYBB
Type II Diabetes Mellitus Signaling	0.507	0.00781	ACSL3
GP6 Signaling Pathway	0.49	0.00746	COL23A1
Ovarian Cancer Signaling	0.465	0.00694	CD44
Synaptic Long Term Depression	0.455	0.00676	RYR3
Phagosome Maturation	0.455	0.00676	CYBB
RhoGDI Signaling	0.394	0.00565	CD44
Calcium Signaling	0.389	0.00556	RYR3
Hepatic Fibrosis / Hepatic Stellate Cell Activation	0.376	0.00535	COL23A1
Production of Nitric Oxide and Reactive Oxygen Species in Macrophages	0.364	0.00515	CYBB
IL-8 Signaling	0.359	0.00508	CYBB
Clathrin-mediated Endocytosis Signaling	0.356	0.00503	AMPH
Signaling by Rho Family GTPases	0.283	0.00397	CYBB
Xenobiotic Metabolism Signaling	0.243	0.00345	HS6ST3
Neuroinflammation Signaling Pathway	0.223	0.00322	CYBB
