# Supplementary material for: Mitochondrial acetyl-CoA reversibly regulates locus-specific histone acetylation and gene expression
Source: Life Sci Alliance. 2019 Feb 8;2(1):e201800228. doi: 10.26508/lsa.201800228 (PMC6369536; doi:10.26508/lsa.201800228)
Supplement: Supplementary file 2 [file LSA-2018-00228_TableS2.xlsx]

## Sheet: Table S5 H3K9ac at 9541 Express
Chr	Promoter Region Start	Promoter Region End	HGNC Gene Symbol
1	760902	764902	LINC00115
1	858260	862260	SAMD11
1	899877	903877	PLEKHN1
1	915497	919497	PERM1
1	933552	937552	HES4
1	946803	950803	ISG15
1	953503	957503	AGRN
1	1007687	1011687	RNF223
1	1049741	1053741	C1orf159
1	1140071	1144071	TNFRSF18
1	1180102	1184102	FAM132A
1	1207265	1211265	UBE2J2
1	1282760	1286760	DVL1
1	1295157	1299157	MXRA8
1	1308875	1312875	AURKAIP1
1	1332708	1336708	CCNL2
1	1340693	1344693	MRPL20
1	1359556	1363556	TMEM88B
1	1368241	1372241	VWA1
1	1405143	1409143	ATAD3B
1	1445531	1449531	ATAD3A
1	1508249	1512249	SSU72
1	1548795	1552795	MIB2
1	1565474	1569474	MMP23B
1	1622167	1626167	SLC35E2B
1	1653966	1657966	CDK11A
1	1675431	1679431	SLC35E2
1	1709896	1713896	NADK
1	1820502	1824502	GNB1
1	1848712	1852712	TMEM52
1	1948780	1952780	GABRD
1	1979909	1983909	PRKCZ
1	2142159	2146159	FAAP20
1	2158134	2162134	SKI
1	2343236	2347236	PEX10
1	2396898	2400898	PLCH2
1	2515930	2519930	FAM213B
1	2983732	2987732	PRDM16
1	3368990	3372990	ARHGEF16
1	3526059	3530059	MEGF6
1	3539566	3543566	TPRG1L
1	3661900	3665900	TP73-AS1
1	3711068	3715068	LRRC47
1	3814857	3818857	C1orf174
1	6238183	6242183	CHD5
1	6302252	6306252	HES3
1	6319035	6323035	GPR153
1	6452451	6456451	ACOT7
1	6638061	6642061	ZBTB48
1	6682926	6686926	THAP3
1	6759984	6763984	DNAJC11
1	6843384	6847384	CAMTA1
1	7829329	7833329	VAMP3
1	7842380	7846380	PER3
1	8084368	8088368	ERRFI1
1	8375886	8379886	SLC45A1
1	8875702	8879702	RERE
1	9187250	9191250	GPR157
1	9292863	9296863	H6PD
1	9350939	9354939	SPSB1
1	9597541	9601541	SLC25A33
1	9646932	9650932	TMEM201
1	9882584	9886584	CLSTN1
1	9968394	9972394	CTNNBIP1
1	10055264	10059264	RBP7
1	10090890	10094890	UBE4B
1	10268764	10272764	KIF1B
1	10456649	10460649	PGD
1	10854707	10858707	CASZ1
1	11070414	11074414	TARDBP
1	11118081	11122081	SRM
1	11157938	11161938	EXOSC10
1	11320608	11324608	MTOR
1	11331263	11335263	UBIAD1
1	11537223	11541223	DISP3
1	11722181	11726181	FBXO6
1	11794141	11798141	AGTRAP
1	11916988	11920988	NPPB
1	11984485	11988485	KIAA2013
1	11992262	11996262	PLOD1
1	12038238	12042238	MFN2
1	12077523	12081523	MIIP
1	12288124	12292124	VPS13D
1	12675737	12679737	DHRS3
1	13907960	13911960	PDPN
1	14024693	14028693	PRDM2
1	14217052	14221052	C1orf196
1	14923200	14927200	KAZN
1	15495813	15499813	C1orf195
1	15571768	15575768	FHAD1
1	15734391	15738391	EFHD2
1	15941995	15945995	DDI2
1	16008827	16012827	PLEKHM2
1	16081102	16085102	FBLIM1
1	16172359	16176359	SPEN
1	16300627	16304627	ZBTB17
1	16398127	16402127	FAM131C
1	16480582	16484582	EPHA2
1	16541823	16545823	ANO7L1
1	16561495	16565495	RSG1
1	16938083	16942083	NBPF1
1	16969178	16973178	CROCCP2
1	17220232	17224232	CROCC
1	17305330	17309330	MFAP2
1	17336423	17340423	ATP13A2
1	17378665	17382665	SDHB
1	17443948	17447948	PADI2
1	17764220	17768220	RCC2
1	17864330	17868330	ARHGEF10L
1	18432240	18436240	IGSF21
1	19227275	19231275	ALDH4A1
1	19281180	19285180	IFFO2
1	19534770	19538770	UBR4
1	19810066	19814066	CAPZB
1	19921477	19925477	MINOS1
1	19965048	19969048	NBL1
1	19989780	19993780	HTR6
1	20124438	20128438	TMCO4
1	20207006	20211006	OTUD3
1	20810713	20814713	CAMK2N1
1	20832654	20836654	MUL1
1	20876932	20880932	FAM43B
1	20957948	20961948	PINK1
1	20986000	20990000	DDOST
1	21042510	21046510	KIF17
1	21057330	21061330	SH2D5
1	21111816	21115816	HP1BP3
1	21501377	21505377	EIF4G3
1	21669997	21673997	ECE1
1	21764621	21768621	NBPF3
1	21833858	21837858	ALPL
1	21993856	21997856	RAP1GAP
1	22108099	22112099	USP48
1	22261790	22265790	HSPG2
1	22349681	22353681	LINC00339
1	22377120	22381120	CDC42
1	22468462	22472462	WNT4
1	22776344	22780344	ZBTB40
1	22888057	22892057	EPHA8
1	23035332	23039332	EPHB2
1	23343941	23347941	KDM1A
1	23502301	23506301	LUZP1
1	23668829	23672829	HNRNPR
1	23808750	23812750	ASAP3
1	23855712	23859712	E2F2
1	23884285	23888285	ID3
1	24016269	24020269	RPL11
1	24067645	24071645	TCEB3
1	24102895	24106895	PITHD1
1	24115460	24119460	LYPLA2
1	24125271	24129271	GALE
1	24163110	24167110	HMGCL
1	24192784	24196784	FUCA1
1	24305417	24309417	SRSF10
1	24436665	24440665	MYOM3
1	24512449	24516449	IFNLR1
1	24643812	24647812	GRHL3
1	24827387	24831387	RCAN3
1	25069848	25073848	CLIC4
1	25556993	25560993	SYF2
1	25592327	25596327	RSRP1
1	25662408	25666408	TMEM50A
1	25868071	25872071	LDLRAP1
1	25941959	25945959	MAN1C1
1	26124667	26128667	SELENON
1	26143131	26147131	MTFR1L
1	26183903	26187903	AUNIP
1	26231482	26235482	STMN1
1	26322648	26326648	PAFAH2
1	26435664	26439664	PDIK1L
1	26494362	26498362	ZNF593
1	26558691	26562691	CEP85
1	26603667	26607667	SH3BGRL3
1	26756773	26760773	DHDDS
1	26796941	26800941	HMGN2
1	26854252	26858252	RPS6KA1
1	27020524	27024524	ARID1A
1	27111963	27115963	PIGV
1	27151201	27155201	ZDHHC18
1	27187633	27191633	SFN
1	27214788	27218788	GPN2
1	27318198	27322198	TRNP1
1	27337327	27341327	FAM46B
1	27559007	27563007	WDTC1
1	27646651	27650651	TMEM222
1	27666513	27670513	SYTL1
1	27691383	27695383	MAP3K6
1	27717148	27721148	GPR3
1	27814669	27818669	WASF2
1	27928942	27932942	AHDC1
1	27996729	28000729	IFI6
1	28050490	28054490	FAM76A
1	28097694	28101694	STX12
1	28155289	28159289	PPP1R8
1	28197055	28201055	THEMIS2
1	28239257	28243257	RPA2
1	28259504	28263504	SMPDL3B
1	28283973	28287973	XKR8
1	28413207	28417207	EYA3
1	28584038	28588038	SESN2
1	28653513	28657513	MED18
1	28694114	28698114	PHACTR4
1	28877597	28881597	TRNAU1AP
1	28907495	28911495	SNHG12
1	28967597	28971597	TAF12
1	28993244	28997244	GMEB1
1	29061133	29065133	YTHDF2
1	29136654	29140654	OPRD1
1	29211603	29215603	EPB41
1	29448447	29452447	TMEM200B
1	29506499	29510499	SRSF4
1	29555454	29559454	MECR
1	29561028	29565028	PTPRU
1	31379608	31383608	SDC3
1	31536838	31540838	PUM1
1	31710401	31714401	NKAIN1
1	31847697	31851697	FABP3
1	32081287	32085287	HCRTR1
1	32108497	32112497	PEF1
1	32228494	32232494	ADGRB2
1	32408457	32412457	PTP4A2
1	32477430	32481430	KHDRBS1
1	32535632	32539632	TMEM39B
1	32571639	32575639	KPNA6
1	32643287	32647287	TXLNA
1	32663987	32667987	CCDC28B
1	32710834	32714834	FAM167B
1	32755687	32759687	HDAC1
1	32799980	32803980	MARCKSL1
1	32858332	32862332	BSDC1
1	32928670	32932670	ZBTB8B
1	33003028	33007028	ZBTB8A
1	33167197	33171197	SYNC
1	33205486	33209486	KIAA1522
1	33336083	33340083	FNDC5
1	33349595	33353595	HPCA
1	33365039	33369039	TMEM54
1	33428286	33432286	RNF19B
1	33645671	33649671	TRIM62
1	33720146	33724146	ZNF362
1	33894653	33898653	PHC2
1	33936232	33940232	ZSCAN20
1	35323417	35327417	SMIM12
1	35393186	35397186	DLGAP3
1	35448954	35452954	TMEM35B
1	35495569	35499569	ZMYM6
1	35656749	35660749	SFPQ
1	35732568	35736568	ZMYM4
1	36105445	36109445	PSMB2
1	36183073	36187073	C1orf216
1	36233568	36237568	CLSPN
1	36271773	36275773	AGO4
1	36394319	36398319	AGO3
1	36547676	36551676	TEKT2
1	36552476	36556476	ADPRHL2
1	36613098	36617098	TRAPPC3
1	36619180	36623180	MAP7D1
1	36688017	36692017	THRAP3
1	36769988	36773988	SH3D21
1	36787755	36791755	EVA1B
1	36849497	36853497	STK40
1	36861493	36865493	LSM10
1	36914086	36918086	OSCP1
1	36928038	36932038	MRPS15
1	37497730	37501730	GRIK3
1	37938153	37942153	ZC3H12A
1	37978375	37982375	MEAF6
1	38059540	38063540	GNL2
1	38098595	38102595	RSPO1
1	38228805	38232805	EPHA10
1	38257474	38261474	MANEAL
1	38323292	38327292	MTF1
1	38410729	38414729	INPP5B
1	38454593	38458593	SF3A3
1	38510450	38514450	POU3F1
1	39323495	39327495	RRAGC
1	39454895	39458895	AKIRIN1
1	39489990	39493990	NDUFS5
1	39544988	39548988	MACF1
1	39874151	39878151	KIAA0754
1	39955318	39959318	BMP8A
1	40040462	40044462	PABPC4
1	40103617	40107617	HEYL
1	40135710	40139710	NT5C1A
1	40252533	40256533	BMP8B
1	40347183	40351183	TRIT1
1	40365928	40369928	MYCL
1	40418802	40422802	MFSD2A
1	40503905	40507905	CAP1
1	40561375	40565375	PPT1
1	40625045	40629045	RLF
1	40721779	40725779	ZMPSTE24
1	40913774	40917774	ZFP69B
1	40940887	40944887	ZFP69
1	40972413	40976413	EXO5
1	40995233	40999233	ZNF684
1	41129329	41133329	RIMS3
1	41155320	41159320	NFYC
1	41247684	41251684	KCNQ4
1	41326018	41330018	CITED4
1	41443007	41447007	CTPS1
1	41705826	41709826	SCMH1
1	41825594	41829594	FOXO6
1	42499596	42503596	HIVEP3
1	42799548	42803548	FOXJ3
1	42844466	42848466	RIMKLA
1	42927001	42931001	CCDC30
1	43122096	43126096	PPIH
1	43146098	43150098	YBX1
1	43310280	43314280	ZNF691
1	43422539	43426539	SLC2A1
1	43635820	43639820	CFAP57
1	43822599	43826599	CDC20
1	43831697	43835697	ELOVL1
1	43853479	43857479	MED8
1	43917660	43921660	HYI
1	44113829	44117829	KDM4A
1	44169495	44173495	ST3GAL3
1	44396992	44400992	ARTN
1	44410611	44414611	IPO13
1	44433672	44437672	DPH2
1	44438159	44442159	ATP6V0B
1	44442615	44446615	B4GALT2
1	44455031	44459031	CCDC24
1	44495139	44499139	SLC6A9
1	44677127	44681127	DMAP1
1	44818932	44822932	ERI3
1	44868866	44872866	RNF220
1	45203490	45207490	KIF2C
1	45238923	45242923	RPS8
1	45251377	45255377	BEST4
1	45263897	45267897	PLK3
1	45306735	45310735	PTCH2
1	45450282	45454282	EIF2B3
1	45769881	45773881	ZSWIM5
1	45954872	45958872	TESK2
1	45986719	45990719	PRDX1
1	46014215	46018215	AKR1A1
1	46047518	46051518	NASP
1	46214322	46218322	IPP
1	46667006	46671006	LURAP1
1	46711360	46715360	RAD54L
1	46803849	46807849	NSUN4
1	46857937	46861937	FAAH
1	47182824	47186824	EFCAB14
1	47777819	47781819	STIL
1	47797469	47801469	CMPK1
1	47899689	47903689	FOXD2
1	48935845	48939845	SPATA6
1	49242275	49246275	BEND5
1	50487585	50491585	AGBL4
1	50887172	50891172	DMRTA2
1	51983000	51987000	EPS15
1	52342477	52346477	NRDC
1	52454436	52458436	RAB3B
1	52497488	52501488	KTI12
1	52606046	52610046	ZFYVE9
1	52829865	52833865	CC2D1B
1	53017159	53021159	ZCCHC11
1	53162038	53166038	COA7
1	53190126	53194126	ZYG11B
1	53306183	53310183	ZYG11A
1	53660101	53664101	CPT2
1	53684289	53688289	C1orf123
1	53702282	53706282	MAGOH
1	53791742	53795742	LRP8
1	54197877	54201877	GLIS1
1	54302533	54306533	NDC1
1	54663709	54667709	CYB5RL
1	55005930	55009930	ACOT11
1	55179495	55183495	TTC4
1	55228187	55232187	PARS2
1	55350921	55354921	DHCR24
1	55679039	55683039	USP24
1	59163764	59167764	MYSM1
1	59247785	59251785	JUN
1	59760467	59764467	FGGY
1	60278458	60282458	HOOK1
1	60390462	60394462	CYP2J2
1	61328931	61332931	NFIA
1	61717182	61721182	NFIA-AS1
1	62189095	62193095	TM2D1
1	62206149	62210149	PATJ
1	62899968	62903968	USP1
1	63151969	63155969	DOCK7
1	63247806	63251806	ATG4C
1	63780902	63784902	LINC00466
1	63786730	63790730	FOXD3
1	63831261	63835261	ALG6
1	63987043	63991043	EFCAB7
1	64237693	64241693	ROR1
1	64934428	64938428	CACHD1
1	65208778	65212778	RAVER2
1	65430187	65434187	JAK1
1	65611232	65615232	AK4
1	66256197	66260197	PDE4B
1	66997066	67001066	SGIP1
1	67517782	67521782	SLC35D1
1	67771047	67775047	IL12RB2
1	67894098	67898098	SERBP1
1	68148744	68152744	GADD45A
1	68297150	68301150	GNG12
1	68696803	68700803	WLS
1	68960904	68964904	DEPDC1
1	70032081	70036081	LRRC7
1	70874901	70878901	CTH
1	71511491	71515491	PTGER3
1	71544980	71548980	ZRANB2
1	72746417	72750417	NEGR1
1	76074801	76078801	SLC44A5
1	76188036	76192036	ACADM
1	76249879	76253879	RABGGTB
1	76538389	76542389	ST6GALNAC3
1	77331126	77335126	ST6GALNAC5
1	77683115	77687115	PIGK
1	77745736	77749736	AK5
1	78147104	78151104	ZZZ3
1	78223537	78227537	USP33
1	78243309	78247309	MIGA1
1	79083607	79087607	IFI44L
1	81769845	81773845	ADGRL2
1	84462833	84466833	TTLL7
1	84541745	84545745	PRKACB
1	84762049	84766049	SAMD13
1	84942942	84946942	RPF1
1	84970248	84974248	GNG5
1	85038163	85042163	CTBS
1	85154486	85158486	SSX2IP
1	85356896	85360896	LPAR3
1	85512182	85516182	MCOLN3
1	85664729	85668729	SYDE2
1	85723355	85727355	C1orf52
1	85741771	85745771	BCL10
1	86172116	86176116	ZNHIT6
1	86860025	86864025	ODF2L
1	87168259	87172259	SH3GLB1
1	87378331	87382331	HS2ST1
1	87792151	87796151	LMO4
1	89147905	89151905	PKN2
1	89355627	89359627	GTF2B
1	89988395	89992395	LRRC8B
1	90096631	90100631	LRRC8C
1	90284573	90288573	LRRC8D
1	91180794	91184794	BARHL2
1	91485829	91489829	ZNF644
1	91868426	91872426	HFM1
1	91964404	91968404	CDC7
1	92493539	92497539	EPHX4
1	92543862	92547862	BTBD8
1	92950433	92954433	GFI1
1	93255961	93259961	EVI5
1	93295597	93299597	RPL5
1	93425079	93429079	FAM69A
1	93542792	93546792	MTF2
1	93809445	93813445	DR1
1	93911658	93915658	FNBP1L
1	94310706	94314706	BCAR3
1	94343474	94347474	DNTTIP2
1	94372966	94376966	GCLM
1	94881933	94885933	ABCD3
1	95005356	95009356	F3
1	95283898	95287898	SLC44A3
1	95390834	95394834	CNN3
1	95536501	95540501	ALG14
1	95580894	95584894	TMEM56
1	95697711	95701711	RWDD3
1	97185221	97189221	PTBP2
1	98384605	98388605	DPYD
1	99125236	99129236	SNX7
1	99468588	99472588	PLPPR5
1	100109499	100113499	PALMD
1	100230187	100234187	FRRS1
1	100313640	100317640	AGL
1	100433345	100437345	SLC35A3
1	100501653	100505653	MFSD14A
1	100713390	100717390	DBT
1	100729763	100733763	RTCA
1	101001693	101005693	GPR88
1	101489644	101493644	DPH5
1	101700444	101704444	S1PR1
1	103572052	103576052	COL11A1
1	104066313	104070313	RNPC3
1	107597267	107601267	PRMT6
1	107680629	107684629	NTNG1
1	108505766	108509766	VAV3
1	108740898	108744898	SLC25A24
1	109100711	109104711	FAM102B
1	109232945	109236945	PRPF38B
1	109287296	109291296	STXBP3
1	109415972	109419972	GPSM2
1	109582850	109586850	WDR47
1	109616624	109620624	TAF13
1	109631357	109635357	TMEM167B
1	109754540	109758540	SARS
1	109790641	109794641	CELSR2
1	109823808	109827808	PSRC1
1	109938573	109942573	SORT1
1	109967062	109971062	PSMA5
1	110007180	110011180	SYPL2
1	110024101	110028101	ATXN7L2
1	110034674	110038674	CYB561D1
1	110050360	110054360	AMIGO1
1	110089233	110093233	GNAI3
1	110282384	110286384	GSTM3
1	110450864	110454864	CSF1
1	110525308	110529308	AHCYL1
1	110691108	110695108	SLC6A17
1	110879128	110883128	RBM15
1	110931704	110935704	SLC16A4
1	110948564	110952564	LAMTOR5
1	111215655	111219655	KCNA3
1	111504701	111508701	LRIF1
1	111886910	111890910	PIFO
1	112529777	112533777	KCND3
1	112936803	112940803	CTTNBP2NL
1	113007163	113011163	WNT2B
1	113213763	113217763	MOV10
1	113248056	113252056	RHOC
1	113256099	113260099	PPM1J
1	113261041	113265041	FAM19A3
1	113497635	113501635	SLC16A1
1	113613831	113617831	LRIG2
1	113931371	113935371	MAGI3
1	114300111	114304111	PHTF1
1	114353098	114357098	RSBN1
1	114469814	114473814	HIPK1
1	114694541	114698541	SYT6
1	115051781	115055781	TRIM33
1	115122260	115126260	BCAS2
1	115211043	115215043	DENND2C
1	115257515	115261515	NRAS
1	115299297	115303297	CSDE1
1	115321306	115325306	SIKE1
1	115630121	115634121	TSPAN2
1	115878857	115882857	NGF
1	116182574	116186574	VANGL1
1	116517119	116521119	SLC22A15
1	116913290	116917290	ATP1A1
1	116959197	116963197	ATP1A1-AS1
1	117111661	117115661	CD58
1	117208375	117212375	IGSF3
1	117450679	117454679	PTGFRN
1	117600925	117604925	TTF2
1	117663209	117667209	TRIM45
1	117908071	117912071	MAN1A2
1	118146556	118150556	FAM46C
1	118725846	118729846	SPAG17
1	119681294	119685294	WARS2
1	120188396	120192396	ZNF697
1	120610240	120614240	NOTCH2
1	120835272	120839272	FAM72B
1	120904028	120908028	HIST2H2BA
1	143911143	143915143	FAM72D
1	144591363	144595363	NBPF8
1	145074186	145078186	PDE4DIP
1	145094220	145098220	SEC22B
1	145207119	145211119	NOTCH2NL
1	145287772	145291772	NBPF10
1	145436469	145440469	TXNIP
1	145475085	145479085	LIX1L
1	145505598	145509598	RBM8A
1	145547227	145551227	ANKRD35
1	145573233	145577233	PIAS3
1	145588461	145592461	NUDT17
1	145713614	145717614	CD160
1	145825103	145829103	GPR89A
1	146080765	146084765	NBPF11
1	146371546	146375546	NBPF12
1	146642129	146646129	PRKAB2
1	147011182	147015182	BCL9
1	147140618	147144618	ACP6
1	147398506	147402506	GPR89B
1	148553979	148557979	NBPF15
1	149398542	149402542	HIST2H3PS2
1	149802232	149806232	HIST2H4A
1	149830714	149834714	HIST2H4B
1	149887434	149891434	SV2A
1	149898236	149902236	SF3B4
1	149906791	149910791	MTMR11
1	149980686	149984686	OTUD7B
1	150037369	150041369	VPS45
1	150119373	150123373	PLEKHO1
1	150206504	150210504	ANP32E
1	150228169	150232169	CA14
1	150252953	150256953	CIART
1	150264289	150268289	MRPS21
1	150291925	150295925	PRPF3
1	150333567	150337567	RPRD2
1	150457887	150461887	TARS2
1	150478538	150482538	ECM1
1	150519884	150523884	ADAMTSL4
1	150531969	150535969	ADAMTSL4-AS1
1	150550073	150554073	MCL1
1	150600088	150604088	ENSA
1	150667672	150671672	GOLPH3L
1	150847244	150851244	ARNT
1	150896739	150900739	SETDB1
1	150945479	150949479	CERS2
1	150952493	150956493	ANXA9
1	151018216	151022216	C1orf56
1	151041054	151045054	GABPB2
1	151117104	151121104	SEMA6C
1	151225179	151229179	PSMD4
1	151252094	151256094	ZNF687
1	151298191	151302191	PI4KB
1	151317833	151321833	RFX5
1	151343209	151347209	SELENBP1
1	151370010	151374010	PSMB4
1	151429941	151433941	POGZ
1	151480986	151484986	CGN
1	151510781	151514781	TUFT1
1	151582541	151586541	SNX27
1	151687290	151691290	CELF3
1	151761892	151765892	TDRKH
1	151880284	151884284	THEM4
1	151964866	151968866	S100A10
1	152018383	152022383	S100A11
1	152084556	152088556	TCHH
1	153230176	153234176	LOR
1	153538366	153542366	S100A2
1	153598402	153602402	S100A1
1	153629130	153633130	SNAPIN
1	153641524	153645524	ILF2
1	153649113	153653113	NPR1
1	153698543	153702543	INTS3
1	153744830	153748830	SLC27A3
1	153893451	153897451	GATAD2B
1	153917172	153921172	DENND4B
1	153929101	153933101	CRTC2
1	153948164	153952164	JTB
1	153956834	153960834	RAB13
1	153961235	153965235	RPS27
1	154165124	154169124	TPM3
1	154242987	154246987	HAX1
1	154296029	154300029	ATP8B2
1	154375669	154379669	IL6R
1	154529504	154533504	UBE2Q1
1	154538257	154542257	CHRNB2
1	154598475	154602475	ADAR
1	154840756	154844756	KCNN3
1	154907467	154911467	PMVK
1	154926599	154930599	PBXIP1
1	154934329	154938329	PYGO2
1	154953814	154957814	FLAD1
1	154973127	154977127	ZBTB7B
1	155021042	155025042	ADAM15
1	155097936	155101936	EFNA1
1	155105820	155109820	SLC50A1
1	155111071	155115071	DPM3
1	155143873	155147873	TRIM46
1	155195214	155199214	GBAP1
1	155212653	155216653	GBA
1	155223274	155227274	FAM189B
1	155230221	155234221	SCAMP3
1	155276539	155280539	FDPS
1	155530598	155534598	ASH1L
1	155577979	155581979	MSTO1
1	155879195	155883195	RIT1
1	155902191	155906191	KIAA0907
1	155909480	155913480	RXFP4
1	155988750	155992750	SSR2
1	156115157	156119157	SEMA4A
1	156161880	156165880	SLC25A44
1	156180773	156184773	PMF1
1	156263463	156267463	GLMP
1	156305105	156309105	TSACC
1	156468620	156472620	MEF2D
1	156540396	156544396	IQGAP3
1	156559542	156563542	NAXE
1	156569288	156573288	GPATCH4
1	156609182	156613182	BCAN
1	156645189	156649189	NES
1	156673608	156677608	CRABP2
1	156709382	156713382	MRPL24
1	156718402	156722402	PRCC
1	156734717	156738717	HDGF
1	156826810	156830810	INSRR
1	156861490	156865490	PEAR1
1	156888442	156892442	LRRC71
1	157013162	157017162	ARHGEF11
1	157106266	157110266	ETV3
1	157961063	157965063	KIRREL
1	158147737	158151737	CD1D
1	159823137	159827137	C1orf204
1	159893522	159897522	TAGLN2
1	159913394	159917394	IGSF9
1	159999783	160003783	PIGM
1	160038038	160042038	KCNJ10
1	160066733	160070733	IGSF8
1	160173127	160177127	PEA15
1	160368376	160372376	VANGL2
1	161013767	161017767	USF1
1	161066151	161070151	KLHDC9
1	161100478	161104478	DEDD
1	161120566	161124566	UFC1
1	161127240	161131240	USP21
1	161134200	161138200	PPOX
1	161145309	161149309	B4GALT3
1	161226517	161230517	PCP4L1
1	161282047	161286047	SDHC
1	161492036	161496036	HSPA6
1	161717548	161721548	DUSP12
1	161734084	161738084	ATF6
1	161991644	161995644	OLFML2B
1	162037564	162041564	NOS1AP
1	162465041	162469041	UHMK1
1	162529321	162533321	UAP1
1	162758492	162762492	HSD17B7
1	165412433	165416433	RXRG
1	165598098	165602098	MGST3
1	165666100	165670100	ALDH9A1
1	165736417	165740417	TMCO1
1	165794768	165798768	UCK2
1	166134206	166138206	FAM78B
1	166806681	166810681	POGK
1	166843564	166847564	TADA1
1	166942719	166946719	ILDR2
1	167188066	167192066	POU2F1
1	167521004	167525004	CREG1
1	167688429	167692429	MPZL1
1	168104821	168108821	GPR161
1	168146171	168150171	TIPRL
1	168193176	168197176	SFT2D2
1	169072935	169076935	ATP1B1
1	169453241	169457241	SLC19A2
1	169553826	169557826	F5
1	169762107	169766107	METTL18
1	169861408	169865408	SCYL3
1	170113142	170117142	METTL11B
1	170499270	170503270	GORAB
1	170629869	170633869	PRRX1
1	171281347	171285347	FMO4
1	171452651	171456651	PRRC2C
1	171709387	171713387	VAMP4
1	171748788	171752788	METTL13
1	171808621	171812621	DNM3
1	172411230	172415230	PIGC
1	172499489	172503489	SUCO
1	173444405	173448405	PRDX6
1	173682080	173686080	KLHL20
1	173983344	173987344	RC3H1-IT1
1	173989435	173993435	RC3H1
1	174126548	174130548	RABGAP1L
1	174966300	174970300	CACYBP
1	174990561	174994561	MRPS14
1	175160079	175164079	KIAA0040
1	176174629	176178629	RFWD2
1	177132109	177136109	ASTN1
1	177138063	177142063	BRINP2
1	178060864	178064864	RASAL2
1	178509887	178513887	C1orf220
1	178692300	178696300	RALGPS2
1	178992939	178996939	FAM20B
1	179048512	179052512	TOR3A
1	179196819	179200819	ABL2
1	179260925	179264925	SOAT1
1	179332855	179336855	AXDND1
1	179844934	179848934	TOR1AIP2
1	179849177	179853177	TOR1AIP1
1	179921873	179925873	CEP350
1	180121969	180125969	QSOX1
1	180197421	180201421	LHX4
1	180470089	180474089	ACBD6
1	180599140	180603140	XPR1
1	180990047	180994047	STX6
1	181001067	181005067	MR1
1	181055638	181059638	IER5
1	182359341	182363341	GLUL
1	182556391	182560391	RNASEL
1	182571543	182575543	RGS16
1	182756428	182760428	NPL
1	182806439	182810439	DHX9
1	182990597	182994597	LAMC1
1	183385737	183389737	NMNAT2
1	183439351	183443351	SMG7
1	184004863	184008863	COLGALT2
1	184018811	184022811	TSEN15
1	184354192	184358192	C1orf21
1	184722047	184726047	EDEM3
1	184941682	184945682	FAM129A
1	185012496	185016496	RNF2
1	185284461	185288461	IVNS1ABP
1	185701683	185705683	HMCN1
1	186647559	186651559	PTGS2
1	186796085	186800085	PLA2G4A
1	192776169	192780169	RGS2
1	193073244	193077244	GLRX2
1	193089147	193093147	CDC73
1	193153784	193157784	B3GALT2
1	196575541	196579541	KCNT2
1	197113824	197117824	ASPM
1	197742826	197746826	DENND1B
1	197869777	197873777	C1orf53
1	198124093	198128093	NEK7
1	199994730	199998730	NR5A2
1	200377184	200381184	ZNF281
1	200587862	200591862	KIF14
1	200637126	200641126	DDX59
1	200706686	200710686	CAMSAP2
1	200858176	200862176	C1orf106
1	200990828	200994828	KIF21B
1	201079694	201083694	CACNA1S
1	201138702	201142702	TMEM9
1	201436365	201440365	PHLDA3
1	201476584	201480584	CSRP1
1	201796269	201800269	IPO9
1	201913716	201917716	LMOD1
1	201922619	201926619	TIMM17A
1	201949500	201953500	RNPEP
1	202111869	202115869	ARL8A
1	202309108	202313108	UBE2T
1	202315827	202319827	PPP1R12B
1	202677545	202681545	SYT2
1	202776598	202780598	KDM5B
1	202856263	202860263	RABIF
1	202895764	202899764	KLHL12
1	202925700	202929700	ADIPOR1
1	202934408	202938408	CYB5R1
1	202974514	202978514	TMEM183A
1	202993626	202997626	PPFIA4
1	203240769	203244769	CHIT1
1	203272619	203276619	BTG2
1	203593689	203597689	ATP2B4
1	203828731	203832731	SNRPE
1	204040243	204044243	SOX13
1	204119307	204123307	ETNK2
1	204378945	204382945	PPP1R15B
1	204461852	204465852	PIK3C2B
1	204483511	204487511	MDM4
1	204652861	204656861	LRRN2
1	204795779	204799779	NFASC
1	205089143	205093143	RBBP5
1	205178727	205182727	DSTYK
1	205195304	205199304	TMCC2
1	205288883	205292883	NUAK2
1	205423082	205427082	LEMD1
1	205471723	205475723	CDK18
1	205536013	205540013	MFSD4A
1	205599090	205603090	ELK4
1	205647587	205651587	SLC45A3
1	205717404	205721404	NUCKS1
1	205742588	205746588	RAB29
1	205780876	205784876	SLC41A1
1	206134916	206138916	FAM72A
1	206221976	206225976	AVPR1B
1	206641791	206645791	IKBKE
1	206783904	206787904	EIF2D
1	206806881	206810881	DYRK3
1	206856289	206860289	MAPKAPK2
1	207492853	207496853	CD55
1	207625575	207629575	CR2
1	207816458	207820458	CR1L
1	207923402	207927402	CD46
1	208040495	208044495	C1orf132
1	208082747	208086747	CD34
1	208415665	208419665	PLXNA2
1	209846765	209850765	G0S2
1	209955904	209959904	C1orf74
1	209999352	210003352	DIEXF
1	210109538	210113538	SYT14
1	210499596	210503596	HHAT
1	211429719	211433719	RCOR3
1	211497957	211501957	TRAF5
1	211554145	211558145	LINC00467
1	211750084	211754084	SLC30A1
1	211846960	211850960	NEK2
1	212002114	212006114	LPGAT1
1	212456782	212460782	PPP2R5A
1	212586243	212590243	TMEM206
1	212604229	212608229	NENF
1	212736676	212740676	ATF3
1	212871327	212875327	BATF3
1	213121862	213125862	VASH2
1	213187168	213191168	ANGEL2
1	213222589	213226589	RPS6KC1
1	214154524	214158524	PROX1
1	214452445	214456445	SMYD2
1	214723792	214727792	PTPN14
1	214774538	214778538	CENPF
1	215738735	215742735	KCTD3
1	218456629	218460629	RRP15
1	218517577	218521577	TGFB2
1	219345186	219349186	LYPLAL1
1	220129989	220133989	SLC30A10
1	220218000	220222000	EPRS
1	220443796	220447796	RAB3GAP2
1	220699568	220703568	MARK1
1	220861187	220865187	C1orf115
1	220919567	220923567	2017-03-02
1	220958101	220962101	2017-03-01
1	221049699	221053699	HLX
1	221913518	221917518	DUSP10
1	222761275	222765275	TAF1A
1	222789428	222793428	MIA3
1	222986406	222990406	DISP1
1	223314624	223318624	TLR5
1	223535544	223539544	SUSD4
1	223887295	223891295	CAPN2
1	224031674	224035674	TP53BP2
1	224299789	224303789	FBXO28
1	224516089	224520089	NVL
1	224542552	224546552	CNIH4
1	225614627	225618627	LBR
1	225838844	225842844	ENAH
1	225963531	225967531	SRP9
1	225995794	225999794	EPHX1
1	226068069	226072069	TMEM63A
1	226109978	226113978	PYCR2
1	226185066	226189066	SDE2
1	226247552	226251552	H3F3A
1	226372431	226376431	ACBD3
1	226495570	226499570	LIN9
1	226593780	226597780	PARP1
1	226734501	226738501	STUM
1	226925024	226929024	ITPKB
1	227055885	227059885	PSEN2
1	227504175	227508175	CDC42BPA
1	227749236	227753236	ZNF678
1	227914240	227918240	SNAP47
1	227921112	227925112	JMJD4
1	228133631	228137631	WNT9A
1	228192752	228196752	WNT3A
1	228268361	228272361	ARF1
1	228325663	228329663	GUK1
1	228399365	228403365	C1orf145
1	228592541	228596541	TRIM11
1	228672762	228676762	RNF187
1	228868824	228872824	RHOU
1	229404822	229408822	RAB4A
1	229477041	229481041	CCSAP
1	229642103	229646103	NUP133
1	229692442	229696442	ABCB10
1	230559475	230563475	PGBD5
1	230776235	230780235	COG2
1	231003335	231007335	C1orf198
1	231173992	231177992	FAM89A
1	231295858	231299858	TRIM67
1	231558790	231562790	EGLN1
1	231662287	231666287	TSNAX
1	231760561	231764561	DISC1
1	233084351	233088351	NTPCR
1	233429459	233433459	PCNX2
1	233747750	233751750	KCNK1
1	234507202	234511202	COA6
1	234612849	234616849	TARBP1
1	234743271	234747271	IRF2BP2
1	235290251	235294251	TOMM20
1	235322772	235326772	RBM34
1	235528675	235532675	TBCE
1	235665781	235669781	B3GALNT2
1	235812054	235816054	GNG4
1	236226462	236230462	NID1
1	236303832	236307832	GPR137B
1	236443319	236447319	ERO1B
1	236679300	236683300	LGALS8
1	236685808	236689808	LGALS8-AS1
1	236765804	236769804	HEATR1
1	236847754	236851754	ACTN2
1	236956581	236960581	MTR
1	237203505	237207505	RYR2
1	239547865	239551865	CHRM3
1	240773449	240777449	GREM2
1	241518530	241522530	RGS7
1	241681061	241685061	FH
1	241797232	241801232	CHML
1	242009269	242013269	EXO1
1	242685998	242689998	PLD5
1	244012381	244016381	AKT3
1	244212583	244216583	ZBTB18
1	244814237	244818237	DESI2
1	244996624	245000624	COX20
1	245025844	245029844	HNRNPU
1	245131007	245135007	EFCAB2
1	245316287	245320287	KIF26B
1	246668614	246672614	SMYD3
1	246885349	246889349	SCCPDH
1	247093280	247097280	AHCTF1
1	247169395	247173395	ZNF695
1	247240113	247244113	ZNF670
1	247265674	247269674	ZNF669
1	247333310	247337310	ZNF124
1	247493148	247497148	ZNF496
1	249118832	249122832	SH3BP5L
1	249130409	249134409	ZNF672
1	249151343	249155343	ZNF692
1	249198395	249202395	PGBD2
2	44870	48870	FAM110C
2	286851	290851	FAM150B
2	675439	679439	TMEM18
2	944554	948554	SNTG2
2	1746624	1750624	PXDN
2	3303236	3307236	TSSC1-IT1
2	3521507	3525507	ADI1
2	3604206	3608206	RNASEH1
2	3620795	3624795	RPS7
2	7055523	7059523	RNF144A
2	8816975	8820975	ID2
2	8975760	8979760	KIDINS220
2	9141942	9145942	MBOAT2
2	9344894	9348894	ASAP2
2	9611787	9615787	IAH1
2	9693921	9697921	ADAM17
2	9769143	9773143	YWHAQ
2	9981483	9985483	TAF1B
2	10180976	10184976	KLF11
2	10219071	10223071	CYS1
2	10260455	10264455	RRM2
2	10441015	10445015	HPCAL1
2	10586630	10590630	ODC1
2	10828101	10832101	NOL10
2	10859775	10863775	ATP6V1C2
2	11050063	11054063	KCNF1
2	11271179	11275179	C2orf50
2	11293324	11297324	PQLC3
2	11486456	11490456	ROCK2
2	11604297	11608297	E2F6
2	12855015	12859015	TRIB2
2	15699454	15703454	NBAS
2	15729302	15733302	DDX1
2	16845599	16849599	FAM49A
2	17697706	17701706	RAD51AP2
2	17718393	17722393	VSNL1
2	17933125	17937125	GEN1
2	18057114	18061114	KCNS3
2	18739946	18743946	RDH14
2	19556414	19560414	OSR1
2	20099747	20103747	TTC32
2	20187892	20191892	WDR35
2	20210455	20214455	MATN3
2	20249789	20253789	LAPTM4A
2	20423194	20427194	SDC1
2	20549995	20553995	PUM2
2	20644835	20648835	RHOB
2	20848849	20852849	HS1BP3
2	20864424	20868424	GDF7
2	21020882	21024882	LDAH
2	23606088	23610088	KLHL29
2	24306731	24310731	TP53I3
2	24344347	24348347	PFN4
2	24581583	24585583	ITSN2
2	24712783	24716783	NCOA1
2	25140708	25144708	ADCY3
2	25262999	25266999	EFR3B
2	25563459	25567459	DNMT3A
2	25894503	25898503	DTNB
2	26099385	26103385	ASXL2
2	26203618	26207618	KIF3C
2	26254976	26258976	RAB10
2	26393960	26397960	GAREM2
2	26567685	26571685	ADGRF3
2	26622784	26626784	DRC1
2	26913558	26917558	KCNK3
2	27068615	27072615	DPYSL5
2	27191480	27195480	MAPRE3
2	27253778	27257778	TMEM214
2	27271132	27275132	AGBL5-AS1
2	27292641	27296641	OST4
2	27307615	27311615	KHK
2	27339995	27343995	CGREF1
2	27344682	27348682	ABHD1
2	27355543	27359543	PREB
2	27438258	27442258	CAD
2	27546547	27550547	MPV17
2	27577868	27581868	GTF3C2
2	27601657	27605657	ZNF513
2	27630554	27634554	PPM1G
2	27648657	27652657	NRBP1
2	27710656	27714656	IFT172
2	27803897	27807897	ZNF512
2	27992584	27996584	MRPL33
2	28613315	28617315	FOSL2
2	28972506	28976506	PPP1CB
2	29091167	29095167	TRMT61B
2	29115509	29119509	WDR43
2	30142432	30146432	ALK
2	30367807	30371807	YPEL5
2	30452397	30456397	LBH
2	30668092	30672092	LCLAT1
2	32234299	32238299	MEMO1
2	32262881	32266881	DPY30
2	32286680	32290680	SPAST
2	32388933	32392933	SLC30A6
2	32500979	32504979	YIPF4
2	32580096	32584096	BIRC6
2	32851099	32855099	TTC27
2	33170039	33174039	LTBP1
2	33822449	33826449	FAM98A
2	36581069	36585069	CRIM1
2	37191615	37195615	STRN
2	37382208	37386208	EIF2AK2
2	37421741	37425741	SULT6B1
2	37549951	37553951	PRKD3
2	37569717	37573717	QPCT
2	38148330	38152330	RMDN2
2	38300791	38304791	CYP1B1-AS1
2	38602427	38606427	ATL2
2	38828728	38832728	HNRNPLL
2	38891052	38895052	GALM
2	39349486	39353486	SOS1
2	39662453	39666453	MAP4K3
2	39890122	39894122	TMEM178A
2	40004407	40008407	THUMPD2
2	42273160	42277160	PKDCC
2	42394490	42398490	EML4
2	43017733	43021733	HAAO
2	43451748	43455748	ZFP36L2
2	43821185	43825185	THADA
2	43862412	43866412	PLEKHH2
2	43999178	44003178	DYNC2LI1
2	44221144	44225144	LRPPRC
2	44393108	44397108	PPM1B
2	45166902	45170902	SIX3
2	45234569	45238569	SIX2
2	45837304	45841304	SRBD1
2	45876484	45880484	PRKCE
2	46924091	46928091	SOCS5
2	47141296	47145296	TTC7A
2	47166994	47170994	MCFD2
2	47401740	47405740	CALM2
2	47570297	47574297	EPCAM
2	47628108	47632108	MSH2
2	47796078	47800078	KCNK12
2	48008221	48012221	MSH6
2	48130932	48134932	FBXO11
2	48539776	48543776	FOXN2
2	48665737	48669737	PPP1R21
2	53992929	53996929	CHAC2
2	54012181	54016181	ERLEC1
2	54195977	54199977	PSME4
2	54340540	54344540	ACYP2
2	54555171	54559171	C2orf73
2	54681422	54685422	SPTBN1
2	54948636	54952636	EML6
2	55337757	55341757	RTN4
2	55494483	55498483	MTIF2
2	55507460	55511460	PRORSD1P
2	55645057	55649057	CCDC88A
2	55744740	55748740	CFAP36
2	55844015	55848015	PPP4R3B
2	55919045	55923045	PNPT1
2	56149274	56153274	EFEMP1
2	56409258	56413258	CCDC85A
2	58466507	58470507	FANCL
2	60778702	60782702	BCL11A
2	60981365	60985365	PAPOLG
2	61106656	61110656	REL
2	61291006	61295006	KIAA1841
2	61370243	61374243	C2orf74
2	61402553	61406553	AHSA2
2	61695904	61699904	USP34
2	61763761	61767761	XPO1
2	62079278	62083278	FAM161A
2	62421248	62425248	B3GNT2
2	63275192	63279192	OTX1
2	63813743	63817743	MDH1
2	64066074	64070074	UGP2
2	64244567	64248567	VPS54
2	64369588	64373588	PELI1
2	64679103	64683103	LGALSL
2	64749465	64753465	AFTPH
2	64975449	64979449	SERTAD2
2	65213611	65217611	SLC1A4
2	65281500	65285500	CEP68
2	65355240	65359240	RAB1A
2	65452887	65456887	ACTR2
2	65657771	65661771	SPRED2
2	66658584	66662584	MEIS1
2	67622451	67626451	ETAA1
2	68545183	68549183	CNRIP1
2	68868721	68872721	PROKR1
2	69238310	69242310	ANTXR1
2	69612382	69616382	GFPT1
2	69662760	69666760	NFU1
2	70054774	70058774	GMCL1
2	70118692	70122692	SNRNP27
2	70122820	70126820	MXD1
2	70482518	70486518	PCYOX1
2	70518903	70522903	SNRPG
2	70527222	70531222	FAM136A
2	70779325	70783325	TGFA
2	70993357	70997357	ADD2
2	71125720	71129720	VAX2
2	71203510	71207510	ANKRD53
2	71220075	71224075	TEX261
2	71452213	71456213	PAIP2B
2	71501691	71505691	ZNF638
2	72373167	72377167	CYP26B1
2	73051177	73055177	EXOC6B
2	73112489	73116489	SPR
2	73141176	73145176	EMX1
2	73439350	73443350	SMYD5
2	73509559	73513559	FBXO41
2	73518833	73522833	EGR4
2	73610886	73614886	ALMS1
2	73962527	73966527	TPRKB
2	74005284	74009284	DUSP11
2	74054086	74058086	STAMBP
2	74151953	74155953	DGUOK
2	74227840	74231840	TET3
2	74404025	74408025	MOB1A
2	74423689	74427689	MTHFD2
2	74617214	74621214	DCTN1
2	74667549	74671549	RTKN
2	74690537	74694537	MOGS
2	74698449	74702449	MRPL53
2	74774153	74778153	DOK1
2	74780817	74784817	LOXL3
2	74879355	74883355	SEMA4F
2	75059108	75063108	HK2
2	75183619	75187619	POLE4
2	75424826	75428826	TACR1
2	75871909	75875909	MRPL19
2	75936115	75940115	GCFC2
2	77818445	77822445	LRRTM4
2	84685169	84689169	SUCLG1
2	85196216	85200216	KCMF1
2	85358533	85362533	TCF7L1
2	85553548	85557548	TGOLN2
2	85764288	85768288	MAT2A
2	85820848	85824848	RNF181
2	85837189	85841189	C2orf68
2	85910298	85914298	GNLY
2	85976467	85980467	ATOH8
2	86114137	86118137	ST3GAL5
2	86563206	86567206	REEP1
2	86665770	86669770	KDM3A
2	87033519	87037519	CD8A
2	87752887	87756887	CYTOR
2	88353248	88357248	KRCC1
2	88925094	88929094	EIF2AK3
2	88989162	88993162	RPIA
2	96066469	96070469	FAHD2A
2	96779984	96783984	ADRA2B
2	96872563	96876563	STARD7
2	96969297	96973297	SNRNP200
2	96999525	97003525	NCAPH
2	97200480	97204480	ARID5A
2	97403801	97407801	LMAN2L
2	97424639	97428639	CNNM4
2	97479982	97483982	CNNM3
2	97534494	97538494	SEMA4C
2	97758619	97762619	FAHD2B
2	97777233	97781233	ANKRD36
2	98260503	98264503	COX5B
2	98278570	98282570	ACTR1B
2	98610388	98614388	TMEM131
2	98701579	98705579	VWA3B
2	99059317	99063317	INPP4A
2	99345589	99349589	MGAT4A
2	99550722	99554722	KIAA1211L
2	99755948	99759948	C2orf15
2	99795521	99799521	MITD1
2	100104497	100108497	REV1
2	100937195	100941195	LONRF2
2	101032118	101036118	CHST10
2	101177152	101181152	PDCL3
2	101434614	101438614	NPAS2
2	101616177	101620177	RPL31
2	101923163	101927163	RNF149
2	102002057	102006057	CREG2
2	102311312	102315312	MAP4K4
2	103234166	103238166	SLC9A2
2	105469969	105473969	POU3F3
2	105652441	105656441	MRPS9
2	105944491	105948491	TGFBRAP1
2	105951816	105955816	C2orf49
2	106359354	106363354	NCK2
2	106808795	106812795	UXS1
2	107082832	107086832	RGPD3
2	107501564	107505564	ST6GAL2
2	108992367	108996367	SULT1C4
2	109063017	109067017	GCC2
2	109148857	109152857	LIMS1
2	109333937	109337937	RANBP2
2	109401213	109405213	CCDC138
2	109743804	109747804	SH3RF3
2	110548335	110552335	RGPD5
2	110960643	110964643	NPHP1
2	111332762	111336762	RGPD6
2	111433691	111437691	BUB1
2	111488150	111492150	ACOXL
2	111874955	111878955	BCL2L11
2	112640267	112644267	ANAPC1
2	112654056	112658056	MERTK
2	112810800	112814800	TMEM87B
2	113010713	113014713	ZC3H8
2	113031171	113035171	ZC3H6
2	113190065	113194065	RGPD8
2	113237731	113241731	TTL
2	113297492	113301492	POLR1B
2	113339817	113343817	CHCHD5
2	113401434	113405434	SLC20A1
2	113520254	113524254	CKAP2L
2	113912902	113916902	PSD4
2	114193268	114197268	CBWD2
2	114382806	114386806	RABL2A
2	114512400	114516400	SLC35F5
2	114645537	114649537	ACTR3
2	118570226	118574226	DDX18
2	118769709	118773709	CCDC93
2	118844028	118848028	INSIG2
2	119603254	119607254	EN1
2	119914465	119918465	C1QL2
2	119979384	119983384	STEAP3
2	120185477	120189477	TMEM37
2	120434743	120438743	TMEM177
2	120515207	120519207	PTPN4
2	120768581	120772581	EPB41L5
2	120978984	120982984	TMEM185B
2	121101719	121105719	INHBB
2	121491199	121495199	GLI2
2	122040783	122044783	TFCP2L1
2	122405163	122409163	CLASP1
2	127862931	127866931	BIN1
2	127975654	127979654	CYP27C1
2	128049752	128053752	ERCC3
2	128144041	128148041	MAP3K2
2	128174003	128178003	PROC
2	128282462	128286462	IWS1
2	128456597	128460597	SFT2D3
2	128566761	128570761	WDR33
2	128613731	128617731	POLR2D
2	128641496	128645496	AMMECR1L
2	128783694	128787694	SAP130
2	128846774	128850774	UGGT1
2	129074151	129078151	HS6ST1
2	130735235	130739235	RAB6C
2	130900707	130904707	CCDC74B
2	131111580	131115580	PTPN18
2	131484643	131488643	GPR148
2	131511008	131515008	AMER3
2	131592489	131596489	ARHGEF4
2	131849033	131853033	FAM168B
2	131860420	131864420	PLEKHB2
2	132248316	132252316	MZT2A
2	132283248	132287248	CCDC74A
2	132557234	132561234	C2orf27B
2	133172147	133176147	GPR39
2	133427152	133431152	LYPD1
2	134875554	134879554	MGAT5
2	135474570	135478570	TMEM163
2	135673805	135677805	CCNT2
2	135807835	135811835	RAB3GAP1
2	136497189	136501189	UBXN4
2	136631996	136635996	MCM6
2	136741670	136745670	DARS
2	136873735	136877735	CXCR4
2	137521115	137525115	THSD7B
2	139257371	139261371	SPOPL
2	139535918	139539918	NXPH2
2	142887270	142891270	LRP1B
2	145088135	145092135	GTDC1
2	145273982	145277982	ZEB2-AS1
2	145280147	145284147	ZEB2
2	148600086	148604086	ACVR2A
2	149400009	149404009	EPC2
2	149630819	149634819	KIF5C
2	149892621	149896621	LYPD6B
2	150184499	150188499	LYPD6
2	150442330	150446330	MMADHC
2	152116393	152120393	RBM43
2	152144571	152148571	NMI
2	152264397	152268397	RIF1
2	152683009	152687009	ARL5A
2	152953593	152957593	CACNB4
2	153030506	153034506	STAM2
2	153189751	153193751	FMNL2
2	154333322	154337322	RPRM
2	154726426	154730426	GALNT13
2	155552811	155556811	KCNJ3
2	157196860	157200860	NR4A2
2	157289802	157293802	GPD2
2	158483517	158487517	ACVR1C
2	158730374	158734374	ACVR1
2	159823146	159827146	TANC1
2	160141310	160145310	WDSUB1
2	160471203	160475203	BAZ2B
2	160567000	160571000	2017-03-07
2	160652753	160656753	CD302
2	161126399	161130399	ITGB6
2	161348305	161352305	RBMS1
2	162162549	162166549	PSMD14
2	162270605	162274605	TBR1
2	162929052	162933052	DPP4
2	164590522	164594522	FIGN
2	165476358	165480358	GRB14
2	165698189	165702189	COBLL1
2	165810035	165814035	SLC38A11
2	166324157	166328157	CSRNP3
2	166649192	166653192	GALNT3
2	166808353	166812353	TTC21B
2	167230503	167234503	SCN9A
2	169102651	169106651	STK39
2	169310372	169314372	CERS6
2	170217195	170221195	LRP2
2	170333688	170337688	BBS5
2	170428385	170432385	FASTKD1
2	170438850	170442850	PPIG
2	171782974	171786974	GORASP2
2	172376757	172380757	CYBRD1
2	172541919	172545919	DYNC1I2
2	172776958	172780958	HAT1
2	172947468	172951468	DLX1
2	172965628	172969628	DLX2
2	173290082	173294082	ITGA6
2	173418101	173422101	PDK1
2	173598002	173602002	RAPGEF4
2	174217548	174221548	CDCA7
2	174828430	174832430	SP3
2	175111426	175115426	OLA1
2	175197674	175201674	SP9
2	175349822	175353822	GPR155
2	175545644	175549644	WIPF1
2	175868097	175872097	CHN1
2	176031110	176035110	ATF2
2	176865567	176869567	LNPK
2	176955619	176959619	HOXD13
2	176962458	176966458	HOXD12
2	176966944	176970944	HOXD11
2	176971518	176975518	HOXD10
2	176992422	176996422	HOXD8
2	176999340	177003340	HOXD3
2	177051307	177055307	HOXD1
2	177132123	177136123	MTX2
2	178075291	178079291	HNRNPA3
2	178415742	178419742	TTC30B
2	178481694	178485694	TTC30A
2	178975151	178979151	RBM45
2	179057208	179061208	OSBPL6
2	180127517	180131517	SESTD1
2	180724232	180728232	ZNF385B
2	180869840	180873840	CWC22
2	182319619	182323619	ITGA4
2	182754560	182758560	SSFA2
2	183578999	183582999	DNAJC10
2	183901586	183905586	NCKAP1
2	183941287	183945287	DUSP19
2	185461093	185465093	ZNF804A
2	187348883	187352883	ZC3H15
2	187452790	187456790	ITGAV
2	187556698	187560698	FAM171B
2	187711935	187715935	ZSWIM2
2	189154396	189158396	GULP1
2	190304159	190308159	WDR75
2	190524146	190528146	ASNSD1
2	190625953	190629953	OSGEPL1
2	191271081	191275081	MFSD6
2	191397448	191401448	NEMP2
2	191509472	191513472	NAB1
2	191743553	191747553	GLS
2	191883686	191887686	STAT1
2	192014322	192018322	STAT4
2	192107911	192111911	MYO1B
2	192540794	192544794	NABP1
2	193058435	193062435	TMEFF2
2	196933730	196937730	DNAH7
2	197456416	197460416	HECW2
2	197502278	197506278	CCDC150
2	197662449	197666449	GTF3C3
2	197790520	197794520	PGAP1
2	198173897	198177897	ANKRD44
2	198297815	198301815	SF3B1
2	198316147	198320147	COQ10B
2	198362718	198366718	HSPE1
2	198568087	198572087	MARS2
2	198667426	198671426	PLCL1
2	200333989	200337989	SATB2
2	200773979	200777979	C2orf69
2	201168604	201172604	SPATS2L
2	201372731	201376731	SGO2
2	201673317	201677317	BZW1
2	201727467	201731467	CLK1
2	201826403	201830403	ORC2
2	201978827	201982827	CFLAR
2	202045604	202049604	CASP10
2	202096166	202100166	CASP8
2	202314334	202318334	TRAK2
2	202506293	202510293	TMEM237
2	202643912	202647912	ALS2
2	202897310	202901310	FZD7
2	203101331	203105331	SUMO1
2	203128439	203132439	NOP58
2	203239659	203243659	BMPR2
2	203497901	203501901	FAM117B
2	203734708	203738708	ICA1L
2	203774937	203778937	CARF
2	204101663	204105663	CYP20A1
2	204190942	204194942	ABI2
2	204398133	204402133	RAPH1
2	205408516	205412516	PARD3B
2	206544562	206548562	NRP2
2	206949027	206953027	INO80D
2	207137387	207141387	ZDBF2
2	207306263	207310263	ADAM23
2	208029991	208033991	KLF7
2	208392461	208396461	CREB1
2	208488652	208492652	METTL21A
2	208574264	208578264	CCNYL1
2	208632287	208636287	FZD5
2	208888284	208892284	PLEKHM3
2	210286782	210290782	MAP2
2	210634717	210638717	UNC80
2	210865289	210869289	RPE
2	211034107	211038107	KANSL1L
2	211088215	211092215	ACADL
2	213401565	213405565	ERBB4
2	214015151	214019151	IKZF2
2	214147113	214151113	SPAG16
2	215672428	215676428	BARD1
2	216174540	216178540	ATIC
2	216298895	216302895	FN1
2	216970187	216974187	XRCC5
2	217234750	217238750	2017-03-04
2	217275137	217279137	SMARCAL1
2	217360912	217364912	RPL37A
2	217495551	217499551	IGFBP2
2	217558248	217562248	IGFBP5
2	219079817	219083817	ARPC2
2	219155309	219159309	TMBIM1
2	219260979	219264979	CTDSP1
2	219573568	219577568	TTLL4
2	219722544	219726544	WNT6
2	219822377	219826377	CDK5R2
2	219848379	219852379	FEV
2	219923189	219927189	IHH
2	220023587	220027587	NHEJ1
2	220081712	220085712	ABCB6
2	220361589	220365589	GMPPA
2	220376892	220380892	ASIC4
2	220460582	220464582	STK11IP
2	220490049	220494049	SLC4A3
2	222436922	222440922	EPHA4
2	223287236	223291236	SGPP2
2	223519056	223523056	FARSB
2	223723652	223727652	ACSL3
2	224700744	224704744	AP1S3
2	224808104	224812104	WDFY1
2	224820121	224824121	MRPL44
2	224902036	224906036	SERPINE2
2	225448110	225452110	CUL3
2	225905162	225909162	DOCK10
2	227662475	227666475	IRS1
2	227698297	227702297	RHBDD1
2	228187867	228191867	MFF
2	228334868	228338868	AGFG1
2	228580728	228584728	SLC19A3
2	228733770	228737770	DAW1
2	230134001	230138001	PID1
2	230577274	230581274	DNER
2	230931715	230935715	SLC16A14
2	231575560	231579560	CAB39
2	231727354	231731354	ITM2C
2	231900205	231904205	C2orf72
2	231919578	231923578	PSMD1
2	231987832	231991832	HTR2B
2	232061260	232065260	ARMC9
2	232377050	232381050	LINC00471
2	232393206	232397206	NMUR1
2	232569605	232573605	PTMA
2	232644381	232648381	COPS7B
2	232648982	232652982	PDE6D
2	232789113	232793113	NPPC
2	232823955	232827955	DIS3L2
2	233350538	233354538	ECEL1
2	233388703	233392703	CHRND
2	233468767	233472767	EFHD1
2	233560009	233564009	GIGYF2
2	234261153	234265153	DGKD
2	234473428	234477428	USP40
2	234761212	234765212	HJURP
2	235403697	235407697	ARL4C
2	235858617	235862617	SH3BP4
2	236400733	236404733	AGAP1
2	237075012	237079012	GBX2
2	237991955	237995955	COPS8
2	238534219	238538219	LRRFIP1
2	238765536	238769536	RAMP1
2	238873469	238877469	UBE2F
2	238967530	238971530	SCLY
2	239065623	239069623	ERFE
2	239110370	239114370	ILKAP
2	239147303	239151303	HES6
2	239196743	239200743	PER2
2	239227082	239231082	TRAF3IP1
2	239333383	239337383	ASB1
2	239754673	239758673	TWIST2
2	240321348	240325348	HDAC4
2	240962819	240966819	NDUFA10
2	241074224	241078224	COPS9
2	241373088	241377088	GPC1
2	241497471	241501471	DUSP28
2	241524133	241528133	CAPN10
2	241757725	241761725	KIF1A
2	241936255	241940255	SNED1
2	242039747	242043747	MTERF4
2	242293658	242297658	FARP2
2	242447145	242451145	STK25
2	242624406	242628406	DTYMK
2	242639450	242643450	ING5
2	242671994	242675994	D2HGDH
3	2138497	2142497	CNTN4
3	3219394	3223394	CRBN
3	3839121	3843121	LRRN1
3	4342988	4346988	SETMAR
3	4506965	4510965	SUMF1
3	4533032	4537032	ITPR1
3	5018801	5022801	BHLHE40
3	5161905	5165905	ARL8B
3	5227331	5231331	EDEM1
3	8541393	8545393	LMCD1
3	9003457	9007457	RAD18
3	9437299	9441299	SETD5
3	9593486	9597486	LHFPL4
3	9689117	9693117	MTMR14
3	9743491	9747491	CPNE9
3	9771413	9775413	BRPF1
3	9789628	9793628	OGG1
3	9809676	9813676	CAMK1
3	9884286	9888286	RPUSD3
3	9930238	9934238	JAGN1
3	9942296	9946296	IL17RE
3	9956758	9960758	IL17RC
3	9973506	9977506	CRELD1
3	9987088	9991088	PRRT3-AS1
3	9992078	9996078	PRRT3
3	10050800	10054800	EMC3
3	10066098	10070098	FANCD2
3	10155276	10159276	BRK1
3	10180692	10184692	VHL
3	10204549	10208549	IRAK2
3	10287707	10291707	TATDN2
3	10360862	10364862	SEC13
3	10747716	10751716	ATP2B2
3	11032410	11036410	SLC6A1
3	11311995	11315995	ATG7
3	11760220	11764220	VGLL4
3	11886393	11890393	TAMM41
3	12326867	12330867	PPARG
3	12523931	12527931	TSEN2
3	12596513	12600513	MKRN2
3	12600519	12604519	MKRN2OS
3	12703725	12707725	RAF1
3	12835971	12839971	CAND2
3	12881087	12885087	RPL32
3	13459809	13463809	NUP210
3	13919618	13923618	WNT7A
3	14442076	14446076	SLC6A6
3	14691271	14695271	CCDC174
3	14987091	14991091	NR2C2
3	15104842	15108842	MRPS25
3	15138670	15142670	RBSN
3	15245659	15249659	CAPN7
3	15899278	15903278	ANKRD28
3	16553533	16557533	RFTN1
3	19187946	19191946	KCNH8
3	20079515	20083515	KAT2B
3	20225784	20229784	SGO1
3	23242511	23246511	UBE2E2
3	23956036	23960036	RPL15
3	24534773	24538773	THRB
3	25704398	25708398	TOP2B
3	25822408	25826408	OXSM
3	25829530	25833530	NGLY1
3	27408951	27412951	NEK10
3	27523911	27527911	SLC4A7
3	27762206	27766206	EOMES
3	28281075	28285075	CMC1
3	29320473	29324473	RBMS3
3	30645994	30649994	TGFBR2
3	30934257	30938257	GADL1
3	31572130	31576130	STT3B
3	32021263	32025263	ZNF860
3	32145181	32149181	GPD1L
3	32278171	32282171	CMTM8
3	32431163	32435163	CMTM7
3	32542900	32546900	CMTM6
3	32610366	32614366	DYNC1LI1
3	32724637	32728637	CNOT10
3	32857510	32861510	TRIM71
3	33153471	33157471	CRTAP
3	33258707	33262707	SUSD5
3	33316517	33320517	FBXL2
3	33480863	33484863	UBP1
3	33757848	33761848	CLASP2
3	33837844	33841844	PDCD6IP
3	36419836	36423836	STAC
3	37282668	37286668	GOLGA4
3	37491606	37495606	ITGA9
3	37901451	37905451	CTDSPL
3	38204580	38208580	OXSR1
3	38386251	38390251	XYLB
3	38493342	38497342	ACVR2B
3	38535618	38539618	EXOG
3	38689164	38693164	SCN5A
3	39091489	39095489	WDR48
3	39194053	39198053	CSRNP1
3	39422839	39426839	SLC25A38
3	39446180	39450180	RPSA
3	39848405	39852405	MYRIP
3	40349175	40353175	EIF1B
3	40516604	40520604	ZNF619
3	40545483	40549483	ZNF620
3	40564369	40568369	ZNF621
3	42001922	42005922	ULK4
3	42053294	42057294	TRAK1
3	42621332	42625332	SS18L2
3	42693176	42697176	ZBTB47
3	42844023	42848023	HIGD1A
3	43018759	43022759	FAM198A
3	43145568	43149568	POMGNT2
3	43326004	43330004	SNRK
3	44377611	44381611	TCAIM
3	44517162	44521162	ZNF445
3	44550128	44554128	ZNF852
3	44664289	44668289	ZNF197-AS1
3	44688219	44692219	ZNF35
3	44901361	44905361	TMEM42
3	45185914	45189914	CDCP1
3	45265770	45269770	TMEM158
3	45427998	45431998	LARS2
3	45728548	45732548	SACM1L
3	46035316	46039316	FYCO1
3	46733194	46737194	ALS2CL
3	46740823	46744823	TMIE
3	46921659	46925659	MYL3
3	47203467	47207467	SETD2
3	47420501	47424501	PTPN23
3	47516616	47520616	SCAP
3	47553251	47557251	ELP6
3	47620282	47624282	CSPG5
3	47821596	47825596	SMARCC1
3	47842399	47846399	DHX30
3	48128769	48132769	MAP4
3	48227892	48231892	CDC25A
3	48280590	48284590	ZNF589
3	48341175	48345175	NME6
3	48469594	48473594	PLXNB1
3	48486114	48490114	ATRIP
3	48540259	48544259	SHISA5
3	48646409	48650409	UQCRC1
3	48670926	48674926	SLC26A6
3	48698348	48702348	CELSR3
3	48721797	48725797	NCKIPSD
3	48934426	48938426	SLC25A20
3	49025319	49029319	P4HTM
3	49042495	49046495	WDR6
3	49064841	49068841	IMPDH2
3	49129796	49133796	QRICH1
3	49140553	49144553	QARS
3	49156371	49160371	USP19
3	49168551	49172551	LAMB2
3	49201754	49205754	CCDC71
3	49207044	49211044	KLHDC8B
3	49376145	49380145	USP4
3	49394033	49398033	GPX1
3	49464759	49468759	NICN1
3	49504146	49508146	DAG1
3	49709435	49713435	APEH
3	49821975	49825975	IP6K1
3	49892007	49896007	TRAIP
3	49905655	49909655	CAMKV
3	49965606	49969606	MON1A
3	49975440	49979440	RBM6
3	50124341	50128341	RBM5
3	50190478	50194478	SEMA3F
3	50240679	50244679	SLC38A3
3	50261724	50265724	GNAI2
3	50328349	50332349	IFRD2
3	50358337	50362337	HYAL2
3	50363682	50367682	TUSC2
3	50395041	50399041	TMEM115
3	50539675	50543675	CACNA2D2
3	50710672	50714672	DOCK3
3	51420478	51424478	MANF
3	51426731	51430731	RBM15B
3	51532010	51536010	DCAF1
3	51573596	51577596	RAD54L2
3	51739086	51743086	GRM2
3	52015425	52019425	ABHD14B
3	52027958	52031958	RPL29
3	52088566	52092566	DUSP7
3	52186706	52190706	POC1A
3	52230102	52234102	ALAS1
3	52271177	52275177	TWF2
3	52277841	52281841	PPM1M
3	52477101	52481101	SEMA3G
3	52713172	52717172	GNL3
3	52717933	52721933	PBRM1
3	52802965	52806965	NEK4
3	53078766	53082766	SFMBT1
3	53162478	53166478	RFT1
3	53288068	53292068	TKT
3	53379637	53383637	DCP1A
3	53526683	53530683	CACNA1D
3	53914229	53918229	ACTR8
3	54154574	54158574	CACNA2D3
3	56500391	56504391	ERC2
3	56589189	56593189	CCDC66
3	56715265	56719265	FAM208A
3	57111357	57115357	ARHGEF3
3	57202334	57206334	IL17RD
3	57540003	57544003	PDE12
3	57581947	57585947	ARF4
3	57676816	57680816	DENND6A
3	57739177	57743177	SLMAP
3	57992127	57996127	FLNB
3	58221233	58225233	ABHD6
3	58289974	58293974	RPP14
3	58316607	58320607	PXK
3	58417584	58421584	PDHB
3	58475841	58479841	KCTD6
3	59033810	59037810	C3orf67
3	61235133	61239133	FHIT
3	61545243	61549243	PTPRG
3	62859064	62863064	CADPS
3	64007658	64011658	PSMD6
3	64251655	64255655	PRICKLE2
3	66022509	66026509	MAGI1
3	66549687	66553687	LRIG1
3	67046727	67050727	KBTBD8
3	67703038	67707038	SUCLG2
3	69061112	69065112	EOGT
3	69099484	69103484	TMF1
3	69127559	69131559	UBA3
3	69132095	69136095	ARL6IP5
3	69589734	69593734	FRMD4B
3	69786586	69790586	MITF
3	71631140	71635140	FOXP1
3	71832357	71836357	PROK2
3	72494069	72498069	RYBP
3	72935224	72939224	GXYLT2
3	73043936	73047936	PPP4R2
3	75832734	75836734	ZNF717
3	81809312	81813312	GBE1
3	85006132	85010132	CADM2
3	87038269	87042269	VGLL3
3	87274421	87278421	CHMP2B
3	89154674	89158674	EPHA3
3	93690910	93694910	PROS1
3	93696983	93700983	ARL13B
3	93745454	93749454	STX19
3	96531425	96535425	EPHA6
3	97481365	97485365	ARL6
3	97689301	97693301	MINA
3	98239910	98243910	CLDND1
3	98310567	98314567	CPOX
3	98618533	98622533	DCBLD2
3	99355319	99359319	COL8A1
3	99534678	99538678	CMSS1
3	99977844	99981844	TBC1D23
3	100051545	100055545	NIT2
3	100209463	100213463	TMEM45A
3	100426205	100430205	TFG
3	100710359	100714359	ABI3BP
3	101230085	101234085	SENP7
3	101278706	101282706	TRMT10C
3	101290939	101294939	PCNP
3	101394339	101398339	ZBTB11
3	101403626	101407626	RPL24
3	101440769	101444769	CEP97
3	101496046	101500046	NXPE3
3	101544835	101548835	NFKBIZ
3	105083753	105087753	ALCAM
3	105586396	105590396	CBLB
3	107239783	107243783	BBX
3	107807872	107811872	CD47
3	107939417	107943417	IFT57
3	111695857	111699857	ABHD10
3	111803182	111807182	C3orf52
3	112707765	112711765	GTPBP8
3	112736708	112740708	NEPRO
3	112927850	112931850	BOC
3	113232034	113236034	SPICE1
3	113249143	113253143	SIDT1
3	113413493	113417493	USF3
3	113664748	113668748	ZDHHC23
3	113773460	113777460	CCDC191
3	114817270	114821270	ZBTB20-AS4
3	114864118	114868118	ZBTB20
3	115340171	115344171	GAP43
3	116076871	116080871	LSAMP-AS1
3	117714095	117718095	LSAMP
3	118957950	118961950	B4GALT4
3	119011220	119015220	ARHGAP31
3	119039607	119043607	ARHGAP31-AS1
3	119215379	119219379	TIMMDC1
3	119394301	119398301	COX17
3	119811264	119815264	GSK3B
3	120066186	120070186	LRRC58
3	120168100	120172100	FSTL1
3	120313156	120317156	NDUFB4
3	120624919	120628919	STXBP5L
3	121263488	121267488	POLQ
3	121466602	121470602	GOLGB1
3	122132882	122136882	WDR5B
3	122231792	122235792	KPNA1
3	122397465	122401465	PARP14
3	122745452	122749452	SEMA5B
3	122783909	122787909	PDIA5
3	122918774	122922774	SEC22A
3	123166605	123170605	ADCY5
3	123601178	123605178	MYLK
3	123678564	123682564	CCDC14
3	123709025	123713025	ROPN1
3	124447213	124451213	UMPS
3	124604674	124608674	ITGB5
3	124772802	124776802	HEG1
3	125092198	125096198	ZNF148
3	125237041	125241041	SNX4
3	125311934	125315934	OSBPL11
3	125653882	125657882	ALG1L
3	125685987	125689987	ROPN1B
3	125896908	125900908	ALDH1L1-AS2
3	126074285	126078285	KLF15
3	126192762	126196762	ZXDC
3	126241126	126245126	CHST13
3	126371998	126375998	TXNRD3
3	126421063	126425063	CHCHD6
3	126705437	126709437	PLXNA1
3	127346024	127350024	PODXL2
3	127389778	127393778	ABTB1
3	127768484	127772484	SEC61A1
3	128210028	128214028	GATA2
3	128397918	128401918	RPN1
3	128442965	128446965	RAB7A
3	128596439	128600439	ACAD9
3	128839644	128843644	RAB43
3	128878136	128882136	ISY1
3	128900765	128904765	CNBP
3	128966449	128970449	COPG1
3	128995671	128999671	HMCES
3	129323661	129327661	PLXND1
3	129610419	129614419	TMCC1
3	130062359	130066359	COL6A5
3	130463673	130467673	PIK3R4
3	131098515	131102515	NUDT16
3	131219827	131223827	MRPL3
3	132134370	132138370	DNAJC13
3	132377567	132381567	ACAD11
3	132755235	132759235	TMEM108
3	133290574	133294574	CDV3
3	133378737	133382737	TOPBP1
3	133612680	133616680	RAB6B
3	133646656	133650656	C3orf36
3	133967689	133971689	RYK
3	134092321	134096321	AMOTL2
3	135682515	135686515	PPP2R3A
3	135914083	135918083	MSL2
3	135967148	135971148	PCCB
3	136469220	136473220	STAG1
3	136535489	136539489	SLC35G2
3	136579050	136583050	NCK1
3	137832660	137836660	DZIP1L
3	137891791	137895791	DBR1
3	137904109	137908109	ARMC8
3	138046728	138050728	NME9
3	138064539	138068539	MRAS
3	138311380	138315380	CEP70
3	138325448	138329448	FAIM
3	138551780	138555780	PIK3CB
3	139106574	139110574	COPB2
3	139256671	139260671	RBP1
3	139394859	139398859	NMNAT3
3	139652027	139656027	CLSTN2
3	140658672	140662672	SLC25A36
3	140768244	140772244	SPSB4
3	141203889	141207889	RASA2
3	141455046	141459046	RNF7
3	141592966	141596966	ATP1B3
3	141866386	141870386	TFDP2
3	141942449	141946449	GK5
3	142164904	142168904	XRN1
3	142295668	142299668	ATR
3	142313229	142317229	PLS1
3	142440916	142444916	TRPC1
3	142606045	142610045	PCOLCE2
3	142680178	142684178	PAQR9
3	142718010	142722010	U2SURP
3	142836173	142840173	CHST2
3	143565373	143569373	SLC9A9
3	143688640	143692640	C3orf58
3	145879440	145883440	PLOD2
3	145966966	145970966	PLSCR4
3	146260651	146264651	PLSCR1
3	148413571	148417571	AGTR1
3	148707128	148711128	GYG1
3	148845371	148849371	HPS3
3	149372807	149376807	WWTR1-AS1
3	149468286	149472286	COMMD2
3	149528495	149532495	RNF13
3	149684172	149688172	ANKUB1
3	150124080	150128080	TSC22D2
3	150262465	150266465	EIF2A
3	150319015	150323015	SERP1
3	150419758	150423758	ERICH6
3	150801484	150805484	MED12L
3	151174497	151178497	IGSF10
3	152550736	152554736	P2RY1
3	152878029	152882029	RAP2B
[truncated: 7,542 more rows]
