# Supplementary material for: Mitochondrial acetyl-CoA reversibly regulates locus-specific histone acetylation and gene expression
Source: Life Sci Alliance. 2019 Feb 8;2(1):e201800228. doi: 10.26508/lsa.201800228 (PMC6369536; doi:10.26508/lsa.201800228)
Supplement: Supplementary file 3 [file LSA-2018-00228_TableS3.xlsx]

## Sheet: Summary DEG Lists
1,615 Upregulated DEGs (all probes up)	1,680 Downregulated DEGs (all probes down)	18 Ambiguous DEGs (probes both up & down)
AAK1	A2M	ALDH1A3
AATF	AASDH	ALS2
ABCA1	ABAT	BICD1
ABCB10	ABCA5	CNIH4
ABCC5	ABCB4	DOCK1
ABCF2	ABCC3	GLS
ABHD12	ABCD4	HDAC8
ABHD13	ABCG1	ICMT
ABHD2	ABHD12B	IDS
ABT1	ABHD18	MTRF1
ACACA	ABHD4	NR2C1
ACAP3	ABR	NRP2
ACO2	ABTB1	PSMG4
ACOT7	ACACB	RPL31
ACOT8	ACKR3	SLC13A3
ACOX2	ACO1	SLC25A37
ACTL8	ACOT4	SLC4A8
ACTN4	ACSF2	VSIG10
ADAMTS1	ACTRT3
ADAMTS16	ACVR2B
ADAMTS2	ADAM21
ADAMTS5	ADAMTS9
ADAMTS6	ADAMTSL3
ADAMTS8	ADD3
ADAR	ADGRB3
ADCY3	ADGRG6
ADCYAP1R1	ADPRH
ADD2	ADRB1
ADGRA2	AFF1
ADGRL3	AGO3
ADIPOR1	AGO4
ADORA2B	AGPAT4
ADRA2A	AGR2
ADRA2C	AGTPBP1
ADSL	AGTRAP
ADSS	AHCYL1
AEN	AHRR
AFF2	AIG1
AFG3L2	AIM1
AGFG2	AK3
AGPAT5	AK4
AHCTF1	AKAP5
AIFM1	AKTIP
AIMP1	ALDH1A2
AK2	ALDH6A1
AKR1C1	ALPK1
AKR1C2	AMN
AKR1C3	AMN1
AKR7A2	AMPD2
ALCAM	AMPD3
ALDH7A1	AMT
ALG3	ANG
ALMS1-IT1	ANKEF1
ALYREF	ANKH
AMBRA1	ANKRD10
AMMECR1	ANKRD22
ANGPT1	ANKRD29
ANGPT2	ANKRD36B
ANK1	ANKRD36C
ANKRD16	ANKRD44
ANKRD17	ANKRD6
ANKRD20A5P	ANXA9
ANKRD54	AP1AR
ANO1	AP1G2
ANO5	AP4B1
ANPEP	AP4S1
ANXA1	APBA2
ANXA2	APH1B
ANXA6	APOL2
AOX1	APOL6
APBB1IP	APPBP2
APCDD1L	ARFGEF2
APEX2	ARFGEF3
API5	ARG2
APITD1	ARHGAP29
APOA1BP	ARHGAP31
APOBEC3B	ARHGAP44
APOC1	ARHGAP5
APTR	ARHGAP6
AR	ARID4A
ARF1	ARIH1
ARF3	ARL10
ARHGAP1	ARL3
ARHGAP11A	ARRB1
ARHGAP32	ARRDC4
ARHGAP4	ARSK
ARHGEF26	ARVCF
ARHGEF7	ARX
ARID1A	AS3MT
ARIH2	ASAH2B
ARL4C	ASB14
ARMC4	ASTN1
ARSB	ATF7IP2
ASAH1	ATG14
ASAP1	ATG16L2
ASCC3	ATHL1
ASF1B	ATL1
ASH1L	ATM
ASH2L	ATP13A4
ASPM	ATP2A3
ASTN2	ATP5F1
ATAD2	ATP5S
ATAD3A	ATP6V1D
ATAD3B	ATP7A
ATAD5	ATP8A1
ATG16L1	ATRX
ATG7	ATXN3
ATOH8	AVIL
ATOX1	AZI2
ATP10A	B3GNT5
ATP1A3	B3GNT7
ATP1B1	B4GALNT3
ATP5B	B4GALT1
ATP5G1	B4GALT4
ATP5O	B4GALT6
ATP6V0C	BAALC
ATP6V1C1	BACE2
ATRIP	BACH2
AUNIP	BAZ1A
AURKAIP1	BAZ2B
AXL	BBC3
AZIN1	BBIP1
B3GALNT2	BBOF1
B3GALT2	BBS1
B3GAT1	BBS12
BAG2	BBS2
BAG4	BBS7
BAIAP2	BBS9
BCL11A	BCAS2
BCOR	BCL2A1
BCS1L	BCL2L13
BGN	BCL3
BICD2	BCL6
BIN3	BDH2
BIRC5	BDKRB2
BLID	BEND6
BLM	BEND7
BMP2	BEX2
BNC1	BFSP1
BNIP1	BHLHE40
BOLA3	BIRC3
BOP1	BLOC1S6
BORA	BMF
BORCS8	BMP4
BPTF	BMP8B
BRCA1	BPGM
BRCA2	BRAF
BRF2	BRMS1L
BRIX1	BRWD1
BRMS1	BRWD3
BUB1	BTBD18
BUD31	BTN2A2
BYSL	BTN3A3
C11orf24	C10orf10
C11orf45	C10orf35
C12orf43	C10orf88
C16orf13	C11orf63
C18orf21	C12orf56
C19orf24	C12orf76
C19orf48	C14orf132
C19orf52	C14orf159
C19orf70	C14orf28
C1orf109	C15orf40
C1orf112	C15orf48
C1orf122	C15orf57
C1orf216	C16orf46
C1orf27	C17orf100
C1orf43	C1orf101
C1orf54	C1orf115
C1orf61	C1orf145
C20orf196	C1orf21
C20orf197	C1orf52
C2orf44	C1QTNF3
C8orf33	C1RL
C9orf114	C20orf194
C9orf3	C21orf58
C9orf78	C21orf62
CABLES1	C2CD4A
CACNA1H	C2CD4B
CACYBP	C2orf81
CAD	C4orf3
CALB2	C4orf36
CALD1	C4orf47
CAMKMT	C5orf28
CAND1	C5orf63
CARD10	C6orf120
CATSPER1	C6orf132
CAV2	C6orf48
CBLL1	C8orf31
CBX2	C8orf4
CCAR2	C9orf72
CCDC137	C9orf85
CCDC15	CA8
CCDC3	CAAP1
CCDC59	CACNA2D2
CCDC69	CACNA2D3
CCDC8	CADM1
CCDC86	CALCOCO1
CCDC88A	CALCRL
CCDC97	CAMK1
CCNB1	CAMK2D
CCND3	CAMKK1
CCSER2	CAPN12
CCT2	CAPN3
CCT3	CAPRIN2
CCT7	CAPZA1
CD14	CARD6
CD22	CARD8
CD2BP2	CARF
CD33	CAST
CD3EAP	CBFA2T2
CD44	CCDC102B
CDADC1	CCDC125
CDC123	CCDC14
CDC14B	CCDC144B
CDC20	CCDC144CP
CDC23	CCDC146
CDC42EP1	CCDC184
CDCA2	CCDC191
CDCA3	CCDC50
CDCA5	CCDC90B
CDCA8	CCDC92
CDCP1	CCL2
CDH11	CCL20
CDK12	CCL28
CDK6	CCNDBP1
CENPI	CCNG2
CENPL	CCNL2
CENPM	CCNYL1
CENPN	CCNYL2
CENPO	CD58
CENPW	CD69
CEP170	CD8A
CEP192	CD93
CERCAM	CD99P1
CGREF1	CDC14A
CHAC2	CDKN1A
CHAF1A	CDS2
CHAF1B	CEBPD
CHCHD7	CECR2
CHD9	CECR6
CHERP	CELF4
CHML	CELF5
CHORDC1	CELSR2
CHRNA9	CEP126
CHST11	CEPT1
CHST3	CERK
CKAP2L	CFAP43
CKAP5	CFAP52
CKS1B	CFAP58
CLEC11A	CFI
CLINT1	CFLAR
CLK4	CGGBP1
CLMP	CHD2
CLN6	CHFR
CLN8	CHKB
CLPB	CHN2
CLTB	CHRD
CNDP2	CHST9
CNN2	CHURC1
CNOT2	CIPC
CNOT4	CITED2
CNTN1	CLCC1
CNTRL	CLCN6
COA7	CLDN23
COG2	CLEC2B
COL16A1	CLEC2D
COL22A1	CLIC6
COL23A1	CLMN
COL5A3	CLTA
COL6A1	CMTM1
COL7A1	CNR1
COPG2	CNTNAP3
COPS6	COBL
COPS8	COCH
COX20	COL13A1
COX4I1	COL27A1
COX5A	COL2A1
COX6CP1	COL4A4
COX8A	COL4A6
CPLX1	COL8A1
CRABP2	COL8A2
CRTAP	COL9A3
CSE1L	COQ10B
CSPP1	COQ2
CST3	CORO2A
CSTF2	CORO2B
CSTF3	COX18
CTTN	COX3
CTU2	CPD
CUL4B	CPS1
CWF19L2	CR2
CXCL12	CRBN
CXorf56	CREB5
CYB5R3	CRELD1
CYB5RL	CRISPLD1
CYC1	CRKL
CYP1A1	CRYGS
CYP2B6	CRYZL1
CYP3A5	CSDE1
DAP3	CSF1
DBF4	CSF2RA
DBNL	CSF3
DCAF13	CSGALNACT2
DCC	CSMD2
DCLK1	CSRNP3
DCLRE1C	CTC1
DCPS	CTHRC1
DCSTAMP	CTSK
DDIAS	CTTNBP2NL
DDX1	CXADR
DDX21	CXCL1
DDX31	CXCL2
DDX39A	CXCL3
DDX41	CXCL8
DDX42	CXXC4
DDX49	CYFIP2
DENND1B	CYGB
DESI1	CYLD
DFFA	CYP26B1
DGAT1	CYP27C1
DGAT2	CYP2J2
DGKE	CYP2U1
DGKH	CYP4V2
DGKZ	DAAM1
DHDDS	DACH1
DHRS2	DAPK2
DHTKD1	DBNDD1
DHX29	DBT
DHX8	DCAF10
DIAPH3	DCAF5
DIEXF	DCHS1
DIMT1	DDB2
DIS3	DDHD1
DIS3L2	DDR1
DKC1	DDX10
DLAT	DDX19B
DLC1	DDX20
DLD	DDX56
DLEU2	DDX58
DLG1	DDX60
DLL3	DENND2A
DLX1	DENND2C
DNAJA3	DENND2D
DNAJC11	DENND4C
DNAJC14	DEPDC5
DNAJC15	DFNA5
DNAJC2	DGKQ
DNAJC7	DHRS7
DNLZ	DICER1
DOCK5	DIP2A
DOHH	DIRC2
DOT1L	DLG3
DPM2	DLL1
DPM3	DMTF1
DPY19L2	DNAH1
DPYD	DNAH11
DPYSL3	DNAH5
DPYSL4	DNAH7
DRD2	DNAJC12
DSCC1	DNAJC18
DSP	DNAJC28
DTD1	DNAJC6
DTL	DNASE1
DTYMK	DNTTIP1
DUS3L	DOCK3
DUSP14	DOCK8
DYRK1A	DOK6
DYRK2	DRAIC
EARS2	DRAM2
EBAG9	DSC2
EBF3	DSG2
EBNA1BP2	DST
EBPL	DTNA
ECI2	DTWD1
EEA1	DTX3
EED	DTX3L
EEF1D	DTX4
EEF1E1	DUOX1
EFHD2	DUSP18
EFNB2	DUSP6
EFTUD2	DYM
EHD2	DZIP1
EI24	EBF4
EIF1AD	EBLN3
EIF2B3	ECHDC2
EIF3A	EDEM1
EIF3B	EDIL3
EIF3K	EFHB
EIF4EBP1	EFNA5
EIF5B	EFNB3
ELF4	EGOT
ELFN2	EID3
ELK4	EIF1
ELOF1	EIF2S1
ELOVL1	EIF4E
ELOVL2	EIF4EBP2
ELP3	EIF5A2
EME1	ELF2
EMG1	ELL2
EMILIN2	ELMOD2
EMP1	ELOVL6
EN2	EML5
ENAH	EML6
ENDOG	ENDOV
ENOX1	ENO2
EPG5	ENOSF1
EPHB6	ENPEP
EPS15L1	ENPP1
EPSTI1	ENPP4
EPT1	ENPP5
ERG	ENTPD3
ERGIC1	ENTPD5
ERGIC2	ENY2
ERI1	EPB41L4A
ERICH1	EPB41L4B
ESCO2	EPCAM
ESF1	EPHX4
ESPL1	EPS8L1
ESX1	EPS8L2
ETF1	ERAP2
ETHE1	ERC2
EVA1C	ERCC1
EWSR1	ERMP1
EXO1	ERN1
EXOC8	ERO1A
EXOSC1	ESAM
EXOSC2	ESR2
EZH2	ETV1
FABP4	ETV6
FABP5	EVC2
FAH	EVI2A
FAM120A	EXD2
FAM155B	EXPH5
FAM166A	EYS
FAM167A	F2R
FAM174B	FADS2
FAM19A4	FAHD2A
FAM19A5	FAHD2CP
FAM20B	FAM101B
FAM20C	FAM102B
FAM210A	FAM117B
FAM3A	FAM118A
FAM43B	FAM120AOS
FAM98A	FAM120B
FANCB	FAM124A
FANCI	FAM134B
FAP	FAM13A
FARP1	FAM149A
FARSA	FAM160A1
FARSB	FAM161A
FAT3	FAM162B
FBF1	FAM177A1
FBLN2	FAM189A1
FBXO31	FAM198A
FBXO32	FAM200B
FBXO5	FAM209A
FCER2	FAM213A
FCRLB	FAM214A
FENDRR	FAM219A
FERMT1	FAM219B
FGF1	FAM63B
FGF14	FAM69A
FGF9	FAM83B
FGFBP1	FAM84B
FGFR2	FANK1
FGFRL1	FAT4
FH	FBXL2
FIS1	FBXL20
FKBP11	FBXO10
FKBP4	FBXO34
FLAD1	FBXO9
FLNA	FER
FLNC	FER1L4
FMN2	FERMT2
FN1	FEV
FNDC3B	FEZ2
FOSL1	FGD4
FOSL2	FGF11
FOXF1	FGF12
FOXF2	FGF19
FOXM1	FGF2
FOXRED1	FGFR1OP2
FPGS	FILIP1
FRS2	FIP1L1
FST	FKBP7
FUT10	FLCN
FXYD5	FLJ31104
FZD8	FLT4
G3BP1	FMO5
G6PC3	FNDC5
G6PD	FOCAD
GABBR2	FOXA2
GABRA2	FOXL2
GABRD	FOXN3
GABRE	FOXRED2
GADD45GIP1	FRA10AC1
GAMT	FRAS1
GAPVD1	FREM2
GART	FRG1CP
GATA4	FRG1HP
GCLM	FRMD4B
GDAP1	FXR1
GDF10	FYCO1
GDF11	GAB1
GEMIN5	GABBR1
GEMIN6	GAD1
GEMIN7	GAL3ST4
GFER	GALNT16
GFM1	GAS8
GFOD1	GATB
GFRA1	GATM
GGCX	GATS
GIGYF2	GATSL2
GIMAP4	GBP3
GINS4	GCA
GJB2	GCH1
GJC1	GCNT2
GLE1	GCNT4
GLIPR1	GDAP2
GLRX2	GDPD1
GLUL	GDPD3
GM2A	GEMIN2
GMNN	GHDC
GMPPB	GHET1
GNAL	GLDC
GNL2	GLDN
GNL3L	GLIDR
GOLGA7	GLIPR2
GON4L	GLIS3
GOSR2	GLRX
GOT1	GLTP
GPAA1	GLYATL2
GPAT4	GNAI3
GPATCH4	GNAT2
GPC4	GNB5
GPR107	GNG2
GPR158	GNG4
GPR50	GOLGA2P5
GPS1	GOLGA8A
GPX3	GOLGA8N
GREM1	GOLGB1
GRIA3	GOLPH3L
GRINA	GPATCH2L
GRM8	GPHN
GRP	GPM6A
GRPEL1	GPR155
GRWD1	GPR19
GSG2	GPRIN3
GSR	GPSM2
GTF2F2	GPX2
GTF2H1	GRAMD2
GTF3C2	GRAMD3
GTF3C5	GRAMD4
GTPBP4	GREB1
GULP1	GRIA4
HABP4	GRIP1
HACD1	GS1-259H13.2
HAS2	GSAP
HAUS7	GSDMB
HAUS8	GSE1
HCCS	GSTA4
HDAC2	GSTM1
HDLBP	GSTM2
HEATR1	GSTM3
HEATR3	GSTM4
HFE	GTDC1
HGH1	GTF2H5
HHIPL2	GTF2IRD2
HIPK2	GTPBP2
HIRIP3	GUSBP1
HIST1H2BG	H2AFJ
HIST1H4B	H2AFY2
HIVEP3	HACD4
HLF	HAGLR
HM13	HCLS1
HMGA2	HDAC9
HMOX2	HDX
HN1	HECTD1
HNRNPAB	HECW1
HNRNPC	HERC6
HNRNPF	HERPUD1
HNRNPU	HES1
HOMER3	HGF
HOPX	HID1
HP1BP3	HIF1A
HPDL	HIP1
HPRT1	HIPK1
HPS1	HIST1H2AG
HPS5	HIST1H2AK
HRH2	HIST1H2BC
HRSP12	HIST1H2BD
HS3ST3A1	HIST3H2A
HS3ST3B1	HIVEP2
HS6ST2	HLA-B
HSPA14	HLA-C
HSPA4	HLA-DQB1
HSPA9	HLA-E
HSPB1	HMGCS2
HSPBP1	HNRNPD
HSPD1	HOMEZ
HSPE1	HOXB5
HSPH1	HOXB6
HTRA3	HOXB7
IBA57	HOXB8
ID2	HOXB9
IDH3A	HOXD1
IER3IP1	HPGD
IER5L	HPSE
IFFO2	HS6ST3
IFI30	HSD17B11
IGF2BP1	HSPA1B
IGFBP6	HSPA2
IKBKG	HSPBAP1
IKZF3	ICA1
IL1RAP	ICAM1
IL1RAPL2	ICOSLG
IL24	IDH1
IL2RB	IDNK
ILF3	IFI16
IMP4	IFI27L2
INF2	IFIH1
ING3	IFITM1
INHBB	IFT27
INTS9	IFT80
INVS	IFT81
IPO11	IGDCC4
IPO4	IGF1R
IPO5	IGFBPL1
IPPK	IGHD3-16
IRGQ	IGSF10
IRX1	IGSF3
ISG20L2	IL13RA2
ISM1	IL17RB
ISOC2	IL17RD
ITFG1	IL18R1
ITGB3	IL1A
ITPRIPL1	IL1B
JAK1	IL31RA
JARID2	IL6ST
JMJD6	IMPG1
JPH1	INADL
KAT6A	INPP1
KBTBD11	INSIG2
KBTBD4	INSR
KBTBD6	INTU
KBTBD7	IP6K2
KCNC3	IQCA1
KCNG3	IQCG
KCNK2	IQCH
KCNK5	IRAK2
KCNN3	IRF9
KCNN4	IRX4
KCNQ2	ISYNA1
KCTD5	ITGA11
KDELR3	ITGAX
KHDRBS1	ITGB5
KHDRBS3	ITPR1
KIAA1524	ITPR2
KIAA1586	ITSN2
KIAA1755	JADE1
KIF13A	JAK2
KIF18A	JAKMIP1
KIF18B	JAKMIP2
KIF1A	JAKMIP3
KIF20A	JMJD1C
KIF20B	JUNB
KIF22	JUND
KIF2C	JUP
KIF7	KALRN
KIFC1	KANSL1L
KIRREL2	KCNA2
KISS1	KCNAB1
KITLG	KCNB1
KLHL18	KCNB2
KLHL21	KCND3
KLHL29	KCNJ8
KMT2D	KCNK10
KPNA2	KCNMA1
KPNB1	KCNT2
KRR1	KCTD20
KRT7	KCTD21
KRTAP2-3	KCTD7
KRTCAP2	KDM4C
L3MBTL4	KDM5C
LACTB2	KDM6B
LAGE3	KHNYN
LAMA4	KIAA0141
LAPTM5	KIAA0355
LARP1	KIAA0895
LARP4	KIAA0930
LAS1L	KIAA1109
LBH	KIAA1147
LCTL	KIAA1211
LENG1	KIAA1217
LEPROTL1	KIAA1324L
LETM2	KIAA1958
LGALS1	KIAA2026
LGR5	KIF1C
LHFP	KIF21B
LIN9	KIF27
LINC00116	KIF5C
LINC00460	KLC1
LINC00467	KLF13
LINC00624	KLF2
LINC00630	KLF3
LINC01139	KLHDC1
LINC01296	KLHL22
LLPH	KLHL24
LMF1	KLHL28
LMNA	KLHL5
LMNB2	KLHL7
LOC100129112	KLHL9
LOC100131262	KRBA2
LOC100422526	KRCC1
LOC100505549	KSR1
LOC100505635	L2HGDH
LOC100507600	L3MBTL1
LOC101928446	LACC1
LOC101929480	LACE1
LOC102723694	LAMA3
LOC102723864	LAMA5
LOC102724689	LAMP3
LOC102724880	LAMTOR5
LOC105370333	LANCL3
LOC105370977	LARGE
LOC105374937	LARP1B
LOC105375492	LEKR1
LOC105378726	LEPR
LOC148413	LGALS3
LOC219688	LHFPL4
LOC284219	LIF
LOC285812	LIMA1
LOC389834	LIN7A
LOC441528	LINC00094
LOC645321	LINC00265
LOC79160	LINC00323
LOC81691	LINC00326
LPA	LINC00342
LPAR3	LINC00476
LRIG3	LINC00537
LRRC15	LINC00622
LRRC47	LINC00623
LRRC59	LINC00662
LRRFIP1	LINC00663
LRWD1	LINC00674
LSM1	LINC00888
LSM11	LINC00899
LSM7	LINC00909
LTV1	LINC00920
LYAR	LINC00944
LZTS1	LINC00960
MAD2L1	LINC00969
MAGEA3	LINC01116
MAGEA6	LINC01138
MAGOH	LINC01215
MAGOHB	LINC01305
MAK16	LINC01356
MALSU1	LINC01410
MAMDC2	LINC01537
MANEAL	LINGO2
MAP2K3	LL0XNC01-250H12.3
MAP3K12	LMLN
MAP7D3	LMO4
MAPKAPK3	LNX1
2017-03-03	LOC100128108
MBOAT2	LOC100128281
MCAM	LOC100128288
MCFD2	LOC100128988
MCM10	LOC100129406
MCM4	LOC100129550
MCPH1	LOC100129917
MCTS1	LOC100131510
MCUR1	LOC100132167
MDFIC	LOC100134937
MDH2	LOC100270804
MDM1	LOC100288310
MECP2	LOC100505938
MED13	LOC100506071
MED25	LOC100506411
MED26	LOC100507395
MED27	LOC100507507
MED4	LOC100996251
MED8	LOC100996455
MEIOB	LOC100996741
MEOX2	LOC101060400
MEPCE	LOC101927027
MEST	LOC101927098
METAP2	LOC101927305
METRNL	LOC101927432
METTL13	LOC101928100
METTL9	LOC101928123
MFAP2	LOC101928504
MFAP3L	LOC101929147
MFN2	LOC101929475
MFNG	LOC101929511
MGP	LOC101929787
MIA	LOC101930085
MICAL2	LOC102606465
MICAL3	LOC102723809
MICALCL	LOC102724275
MICALL1	LOC102724418
MID1	LOC102725108
MIEF1	LOC102725126
MINCR	LOC105369199
MIS18A	LOC105370606
MKI67	LOC105370687
MKL1	LOC105371220
MLLT10	LOC105372733
MLX	LOC105373754
MMACHC	LOC105374419
MME	LOC105374984
MMP19	LOC105376703
MN1	LOC105376896
MON1A	LOC105379448
MPC2	LOC105379477
MPHOSPH10	LOC105379555
MPND	LOC152225
MPP1	LOC153682
MPRIP	LOC154761
MPZL1	LOC157562
MRAP	LOC202181
MRAP2	LOC283745
MRPL12	LOC283788
MRPL15	LOC283861
MRPL17	LOC284023
MRPL20	LOC284080
MRPL21	LOC284561
MRPL24	LOC285097
MRPL27	LOC285147
MRPL35	LOC285628
MRPL37	LOC374443
MRPL4	LOC388692
MRPL41	LOC400756
MRPL46	LOC401320
MRPL50	LOC403323
MRPL55	LOC642852
MRPL57	LOC643072
MRPS11	LOC645513
MRPS12	LOC646014
MRPS14	LOC646778
MRPS16	LOC692247
MRPS18A	LOC727820
MRPS25	LOC728613
MRPS28	LOC729291
MRPS30	LOC729970
MRPS34	LOC90246
MRPS7	LOX
MRS2	LOXL4
MRTO4	LPAR2
MSH2	LPAR4
MSI2	LPIN1
MSRA	LRBA
MSRB3	LRCH3
MSTO1	LRIF1
MTBP	LRIG2
MTCH2	LRP10
MTFR1	LRRC28
MTFR2	LRRC37A2
MTG2	LRRC37A3
MTHFD1L	LRRC6
MTPAP	LRRC75B
MTR	LRRN1
MTX1	LRTM1
MYADM	LSS
MYBBP1A	LTB4R
MYBL1	LTBP4
MYO10	LUC7L
MYO19	LXN
NAA10	LY96
NADK	LZTFL1
NAF1	MAGEL2
NAP1L3	MAGI1
NAPA	MAGI3
NAPRT	MAL
NAT1	MALAT1
NAT10	MAML2
NBPF1	MAML3
NCAPD3	MAN1A2
NCAPG	MAN2A1
NCAPH	MAN2A2
NDC80	MANBA
NDST1	MANEA
NDUFA1	MANSC1
NDUFA10	MAOB
NDUFA11	MAP2
NDUFA3	MAP2K4
NDUFA6	MAP3K3
NDUFAF3	MAP3K8
NDUFAF4	MAP3K9
NDUFB10	MAP4K4
NDUFB11	MAP4K5
NDUFB7	MAP6
NDUFS3	MAPK11
NDUFS7	MAPK12
NEDD9	2017-03-06
NENF	MARVELD2
NETO2	MAX
NF2	MBD5
NFASC	MBOAT1
NFATC2	MCOLN3
NFKBIB	MCTP1
NFRKB	MCTP2
NFYC	MDH1B
NGFR	MED28
NHP2	MED6
NID1	MEDAG
NIPAL4	MEF2C
NKIRAS2	MEGF11
NKRF	MEGF6
NLRP11	MEIG1
NLRP3	MEIS3P1
NME1	MERTK
NMNAT2	METAP1D
NMT1	METTL14
NOC2L	METTL6
NOC4L	MFSD6
NOCT	MGAT4A
NOL11	MGST2
NOL12	MICAL1
NOL7	MINK1
NOL8	MIPOL1
NOL9	MIR210HG
NOLC1	MIR3681HG
NOMO3	MLKL
NOP16	MLXIP
NOP58	MMAA
NOP9	MMAB
NOX4	MMP10
NPRL3	MMP9
NPTX2	MOAP1
NR2F2	MOB3B
NRF1	MOCOS
NRG1	MOV10
NRK	MOXD1
NSDHL	MPDZ
NSF	MPZL2
NSRP1	MPZL3
NTMT1	MR1
NUDCD1	MREG
NUDT19	MRPL42
NUDT5	MSRB2
NUF2	MST1
NUFIP1	MTHFD2L
NUP155	MTMR9LP
NUP188	MTUS1
NUP214	MXD4
NUP43	MYEF2
NUP62	MYH3
NUP98	MYL12A
NUPR1	MYO1D
NVL	MYO5B
OCLM	MYO6
OGFOD3	N4BP2L1
OLFM2	NACAD
OLIG2	NAIP
ONECUT2	NARF
ORAOV1	NATD1
ORC1	NBPF3
ORC5	NBR2
OSBPL8	NCOA6
OSCAR	NCOA7
OXCT1	NDNF
PA2G4	NDRG4
PA2G4P2	NEFM
PACRGL	NEGR1
PACSIN2	NEK11
PAG1	NEK9
PAK1IP1	NFATC4
PALM2	NFE2L3
PAM16	NFIB
PANK2	NFKBIA
PAPOLG	NFKBIZ
PAPPA	NIN
PARP1	NINL
PARVA	NIPA1
PAWR	NIPSNAP3B
PAX1	NKX2-1
PAX7	NMI
PBK	NMRK1
PC	NOL3
PCDH9	NOL4L
PCDHB10	NOVA1
PCOLCE	NPAS2
PDAP1	NPC1
PDE12	NPNT
PDE6D	NPR2
PDE7A	NPY1R
PDE8B	NPY5R
PDLIM5	NR2E1
PDPN	NR4A2
PDS5A	NR5A2
PDS5B	NRAS
PDSS1	NRCAM
PDZRN3	NREP
PEA15	NRG2
PER2	NRROS
PES1	NSUN6
PEX14	NT5DC1
PFDN6	NTN1
PFKP	NTNG1
PGM2	NUBPL
PGP	NUDT3
PHAX	NUDT6
PHB	NUDT9P1
PHF5A	NUP210
PHLDA2	NUP62CL
PHTF2	NUTF2
PIGF	NXPE3
PIGK	OBFC1
PIGP	OCLN
PIK3R1	ODF2L
PINLYP	OGFRL1
PINX1	OGT
PIP4K2A	OPTN
PITHD1	OR2L13
PITRM1	ORAI3
PITX1	ORC4
PKMYT1	OSBPL10
PLA2G5	OSBPL2
PLA2G7	OSCP1
PLD6	OTUB2
PLEC	OTUD4
PLK3	OVGP1
PLOD3	P4HA1
PLPP3	PAK2
PLPP4	PAK3
PLTP	PAN2
PLXDC2	PAOX
PLXNA2	PAPLN
PLXNA4	PAPOLA
PMS1	PAQR3
PMVK	PAQR8
PNMA6A	PARM1
PNMAL1	PARP14
PNO1	PARP8
PNPO	PARP9
PNPT1	PARVG
PODXL	PASD1
POFUT1	PCDH10
POLA2	PCDH7
POLD1	PCED1A
POLD3	PCGF3
POLDIP3	PCMTD2
POLE3	PCNX
POLQ	PCSK5
POLR1A	PDE11A
POLR2D	PDE3A
POLR2F	PDE4D
POLR2L	PDE4DIP
POLR3A	PDE5A
POLR3D	PDE9A
POLR3H	PDGFD
POLR3K	PDGFRA
POMZP3	PDZD2
POP1	PELI2
POP4	PEX11A
POP7	PFKFB2
POU3F2	PFKFB4
PPAN	PGF
PPARD	PGK1
PPARGC1B	PGLS
PPIE	PGPEP1
PPP1R12A	PHACTR2
PPP1R12B	PHF10
PPP1R1A	PHF11
PPP2CA	PHGDH
PPP2R2A	PHTF1
PPRC1	PIGG
PRADC1	PIGL
PRC1	PIGZ
PRCC	PIK3C3
PRDM16	PIK3CD
PRELID1	PIK3CG
PREP	PIK3IP1
PREX2	PIP5K1B
PRKCE	PIRC66
PRKDC	PITPNC1
PRMT1	PKP2
PRO2958	PLA2G16
PROSC	PLA2G4C
PROSER2	PLCG1
PRPF18	PLCG2
PRPF19	PLCL1
PRPF31	PLCXD2
PRPF38A	PLD1
PRPF4	PLEK2
PRPF40A	PLEKHA7
PRPS1	PLEKHG1
PRR11	PLEKHH1
PRR16	PLEKHH2
PRR5L	PLLP
PRR9	PLPP6
PRRC2C	PMAIP1
PRRX1	PNMA1
PRRX2	PNPLA6
PRSS23	PNRC1
PSMB3	POLI
PSMC3	POM121L9P
PSMC3IP	PPA2
PSMC4	PPARA
PSMD1	PPARGC1A
PSMD12	PPM1A
PSMD3	PPM1K
PSME3	PPM1L
PSMG2	PPP1R9A
PSPC1	PPP2R3C
PSTPIP2	PPP2R5C
PTBP1	PPP2R5E
PTGES	PPP3CA
PTGR1	PPP4R1L
PTGS1	PRCD
PTHLH	PRDM5
PTK2	PRKAA2
PTK7	PRKACB
PTPN14	PRKCH
PTPN2	PRKD1
PTPRF	PRKG1
PTPRG	PRMT2
PTPRZ1	PROM1
PTRF	PROS1
PTTG3P	PROX1
PUF60	PROX2
PUM3	PRR14L
PURA	PRR18
PUSL1	PRRG4
PVR	PRTG
PVT1	PSEN1
PWWP2A	PSIP1
PYCR2	PSMA3
PYCRL	PSMA5
PYGB	PSRC1
PYROXD1	PTCHD4
QPRT	PTGFRN
QTRT1	PTGS2
R3HCC1	PTK6
RAB2A	PTPN21
RAB3GAP2	PTPRD
RABEPK	PTPRN2
RAD18	PTPRO
RAD54B	PWAR6
RAMP1	PYGL
RANBP17	PYROXD2
RANGAP1	QPCT
RARS	RAB11FIP4
RASAL2	RAB15
RASL11B	RAB27A
RBFA	RAB3C
RBL1	RAB3IP
RBM10	RAB4A
RBM12B	RAB6B
RBM14	RAD51B
RBM17	RAI14
RBM24	RALGAPA1
RBM26	RALGAPA2
RBM27	RAMP2
RBM28	RAP1A
RBM33	RAP1GDS1
RBM34	RAPGEF2
RBPMS	RAPGEF4
RBX1	RASA2
RC3H2	RASD1
RCAN1	RASGRF2
RCC1	RASSF2
RDH13	RBFOX2
RECQL4	RBM15
REEP4	RBM39
RERE	RBM43
RFC3	RBMS3
RGAG1	RBP4
RGS20	RBP7
RGS4	RDH11
RGS5	REG4
RIOK1	REPS2
RIOK2	RET
RMND5B	RFPL3
RNASEH1	RFPL3S
RNASEH2A	RFX3
RNASEH2B	RGCC
RNASEH2C	RGL1
RNF113A	RGL2
RNF130	RGL3
RNF152	RGP1
RNF219	RGS12
RNF40	RGS3
RNF6	RGS9
RNGTT	RHBDD1
RNPS1	RHOB
RP9	RHOC
RPF2	RHOF
RPL13	RHOJ
RPL26L1	RIC1
RPP38	RIMKLA
RPP40	RNASE4
RPRD1A	RNASEL
RPS19BP1	RNF112
RQCD1	RNF128
RRAS2	RNF141
RRM1	RNF144A
RRN3P2	RNF150
RRN3P3	RNF180
RRP12	RNF207
RRP15	RNF212B
RRP36	RNF213
RRP7A	RNF217
RRP8	RNF32
RRP9	RNF38
RRS1	RNFT2
RSBN1L	RNPC3
RSL1D1	ROBO2
RSPO2	ROR2
RSU1	RPH3AL
RTTN	RPL28
RUNX1T1	RPL32P3
RUVBL2	RPP30
S100A4	RPS15A
S1PR3	RPS29
SAE1	RPS6KA2
SALL3	RRAGA
SART3	RSBN1
SATB2	RSPH9
SBSN	RTN1
SCAF11	RUBCN
SCAF4	RUFY2
SCAMP3	RUFY3
SCARA3	RWDD2A
SCARA5	SALL4
SCARB1	SAMD12
SCFD2	SAMD13
SCLT1	SAMD3
SDC1	SAMD5
SDC2	SARM1
SDCCAG8	SARS
SDF2L1	SAT1
SDF4	SAV1
SDHAF2	SBF1
SEC14L1	SC5D
SEH1L	SCAI
SEMA7A	SCARB2
SENP3	SCARF1
SEPHS1	SCD5
2017-09-06	SCFD1
2017-09-09	SCN3B
SERINC2	SCN8A
SERPINB2	SCUBE1
SERPINB7	SEC31B
SERPINE1	SEC61B
SERPINF1	SEL1L
SERTAD4	SEMA4B
SF3A2	SEMA4D
SF3A3	SEMA6A
SFRP1	SENP2
SFT2D2	2017-09-08
SFXN2	SERPINA10
SFXN4	SERPINA3
SGCD	SERPIND1
SGF29	SERPINI1
SGK223	SETD7
SGMS2	SFI1
SH2D4A	SFXN3
SH3BP4	SGCB
SH3TC2	SGK1
SHC1	SGPP1
SHCBP1	SH3BP2
SHISA2	SH3GL2
SHISA9	SH3GL3
SHPK	SH3GLB1
SIRPA	SH3PXD2A
SIRPB1	SHC2
SKA3	SHC3
SKP2	SHF
SLC10A3	SHROOM4
SLC12A9	SHTN1
SLC16A2	SIKE1
SLC16A7	SIM2
SLC19A1	SIPA1L1
SLC22A18	SIPA1L2
SLC22A4	SIRT5
SLC25A11	SIX4
SLC25A15	SKAP1
SLC25A32	SLC10A1
SLC25A44	SLC12A5
SLC2A13	SLC12A6
SLC30A1	SLC15A2
SLC35A4	SLC16A1
SLC35D1	SLC16A4
SLC35F1	SLC16A5
SLC35F5	SLC1A1
SLC35G1	SLC1A4
SLC37A2	SLC22A15
SLC38A10	SLC24A5
SLC39A3	SLC25A24
SLC41A1	SLC25A27
SLC4A1AP	SLC25A29
SLC4A4	SLC25A36
SLC52A2	SLC25A42
SLC7A2	SLC25A45
SLC8A1	SLC25A51
SLC9A1	SLC26A11
SLCO5A1	SLC26A7
SLIT2	SLC27A2
SLITRK2	SLC27A6
SMAD5	SLC2A10
SMAD6	SLC2A3
SMAD7	SLC30A4
SMCHD1	SLC33A1
SMDT1	SLC38A2
SMG1	SLC38A4
SMG9	SLC38A6
SMIM13	SLC39A10
SMIM7	SLC39A4
SMUG1	SLC40A1
SNAI2	SLC41A2
SNHG12	SLC44A5
SNORD8	SLC45A1
SNRNP25	SLC46A3
SNRPD1	SLC4A7
SNU13	SLC5A3
SNX8	SLC6A6
SOCS5	SLC7A8
SOD1	SLC8A3
SON	SLC9A7
SORBS2	SLFN11
SOS1	SLFN13
SOWAHC	SLFN5
SOX13	SLIT1
SOX8	SMA4
SPAG5	SMARCA1
SPARC	SMOC1
SPATA13	SNAPC1
SPATS2	SNAPC3
SPATS2L	SNCA
SPC24	SNHG10
SPC25	SNN
SPDL1	SNX1
SPEN	SNX21
SPHK1	SNX33
SPRTN	SNX9
SPRYD4	SORD
SPTLC1	SORT1
SPTY2D1	SOS2
SRA1	SOX30
SRCAP	SOX4
SRFBP1	SP110
SRGAP1	SPAG8
SRM	SPATA6L
SRRD	SPATA7
SRSF10	SPIDR
SRSF7	SPINT1
SSR4	SPRED1
SSSCA1	SPTLC2
ST3GAL1	SQRDL
ST3GAL4	SRCIN1
ST6GALNAC4	SREK1IP1
ST8SIA2	SRGAP2B
STARD13	SRGAP3
STEAP1	SRSF5
STIP1	SSBP2
STK17B	SSH2
STK24	SSPN
STOML1	SSTR2
STRA13	ST6GAL1
STRA6	ST6GALNAC3
STXBP6	ST7L
SUCLG1	ST8SIA4
SUFU	STAG3L4
SUGT1	STAMBPL1
SUN3	STAP2
SURF2	STARD9
SURF6	STAT5A
SUSD4	STAT6
SUV39H1	STAU2
SUV39H2	STC1
SVIP	STMN2
SWI5	STOM
SYMPK	STRC
SYNCRIP	STRIP1
SYNGR1	STRIP2
SYNJ1	STRN
SYNRG	STRN3
SZRD1	STX1A
SZT2	STX2
TACC1	STXBP3
TACO1	STXBP5
TADA2A	STYX
TAF5L	SULF1
TAGLN2	SULF2
TAGLN3	SULT4A1
TALDO1	SUMF1
TARBP2	SUPT3H
TBC1D30	SUSD1
TBC1D31	SUZ12
TBCD	SYCP2
TBCE	SYN2
TBK1	SYNE2
TBL3	SYNJ2
TBRG4	SYNJ2BP
TBX2	SYT9
TBX3	SYTL5
TCEA1	TACC2
TCF20	TAF13
TCF25	TAF8
TCF7	TAF9B
TCOF1	TANK
TEAD4	TBC1D16
TEF	TBC1D32
TENM2	TBC1D9
TERF2	TBX15
TEX15	TBXAS1
TEX261	TCAIM
TFAP2A	TCP11L2
TFB2M	TECPR2
TFIP11	TET2
TFPI2	TFDP2
TGFB1	TGFBR3
TGFB2	TGOLN2
TGFBRAP1	THBS4
TGS1	THEM5
THADA	TIA1
THAP4	TIAM2
THBS2	TIFA
THG1L	TIGD1
THRAP3	TIGD7
TICRR	TM4SF1
TIMM10	TM4SF18
TIMM13	TM4SF20
TIMM17A	TMEFF2
TIMM22	TMEM107
TIMM23	TMEM108
TIMM50	TMEM132A
TIMM8A	TMEM150C
TIMM8B	TMEM156
TIMP1	TMEM167B
TIMP2	TMEM170B
TIPIN	TMEM171
TK1	TMEM173
TKT	TMEM178A
TLDC1	TMEM185B
TLE1	TMEM219
TMC7	TMEM242
TMCO6	TMEM30A
TMEM120A	TMEM56
TMEM132E	TMEM87B
TMEM147	TMOD1
TMEM14B	TMTC4
TMEM14C	TNF
TMEM163	TNFAIP2
TMEM178B	TNFAIP3
TMEM19	TNFAIP8L3
TMEM201	TNFRSF10A
TMEM255A	TNFRSF1B
TMEM64	TNFRSF25
TMEM75	TNFRSF9
TMEM80	TNIK
TMTC1	TNKS2
TNFRSF10B	TOB1
TNFRSF11A	TOM1L2
TNFRSF21	TP53BP1
TNPO1	TP53INP1
TNPO3	TP53INP2
TNS1	TPCN2
TOMM22	TPD52L1
TOMM40	TPGS2
TOP1MT	TPTE2P1
TOR1AIP2	TRABD
TP53I11	TRADD
TPM3	TRAK1
TPR	TRERF1
TPRKB	TRIB2
TRAPPC4	TRIB3
TRAPPC5	TRIM16
TRHDE	TRIM2
TRIM24	TRIM21
TRIM35	TRIM27
TRIM4	TRIM33
TRIM58	TRIM36
TRIO	TRIM45
TRMT1	TRIM59
TRMT6	TRIM69
TROAP	TRIM73
TRRAP	TRIM9
TSFM	TRMT5
TSN	TRNT1
TSPAN12	TRO
TSPAN4	TRPA1
TSTA3	TRPC1
TTC4	TRPM6
TTC7A	TSC1
TTF1	TSGA10
TTI2	TSPYL4
TTPA	TSPYL5
TUBA4A	TTBK2
TUBB3	TTC23
TUBB4B	TTC28
TUBG1	TTC30B
TUFM	TTC33
TUNAR	TTC39B
TVP23C	TTC5
TWIST2	TTC8
TWISTNB	TTC9
UAP1	TTLL11
UBA2	TTLL3
UBE2L3	TTLL5
UBE2Q1	TTLL7
UBE3C	TUBBP5
UBE3D	TUBE1
UBL3	TUG1
UBQLN4	TXNDC16
UCHL5	TXNIP
UCK2	UBA6
UGGT2	UBE2D3
UNC5A	UBE2J1
UNC5B	UBE2Q2P6
UNC5D	UBE2QL1
UPF2	UBE2R2
UPF3B	UBN2
UQCC3	ULK2
UQCRQ	UNC13B
URB1	UQCC2
USP14	USO1
USP15	USP30
USP16	USP43
USP24	USP44
USP36	USP45
USPL1	VANGL1
UTP14A	VAV3
UTP15	VEGFA
UTP23	VEPH1
UTP4	VEZT
UTRN	VIPAS39
VARS	VLDLR
VASN	VNN1
VCPIP1	VPS13A
VDAC3	VPS13C
VGLL3	VPS8
VMA21	VSNL1
VPS26B	VTI1B
VPS37A	VWA5A
VRK1	WARS2
VSTM1	WASIR2
VSTM4	WDFY3
VTI1A	WDR19
WDR1	WDR3
WDR12	WDR47
WDR43	WDR59
WDR46	WDR60
WDR5	WDR72
WDR61	WDR73
WDR74	WFDC10B
WHAMM	WFDC3
WHSC1L1	WIF1
WNK4	WIPF1
WNT10B	WIPF3
WNT7A	WLS
WRN	WNK3
WWC1	WNT2B
WWP2	WWTR1
XKRX	XPNPEP1
XPNPEP3	YPEL1
XPO4	YPEL3
XPO6	YWHAH
XPO7	YY1
XRCC1	ZADH2
XRCC6	ZBED4
XYLB	ZBED8
XYLT1	ZBTB1
YDJC	ZBTB22
YEATS2	ZBTB25
YIF1A	ZBTB38
YIF1B	ZBTB4
YRDC	ZBTB5
YTHDF3	ZC3H12C
YY1AP1	ZC3H14
ZBTB2	ZDHHC21
ZBTB6	ZFAND5
ZC3H13	ZFP57
ZC3H7B	ZFP82
ZCCHC10	ZFP90
ZDHHC24	ZFYVE1
ZFC3H1	ZFYVE26
ZFP36L2	ZFYVE28
ZHX1	ZHX2
ZHX1-C8orf76	ZIC1
ZIC3	ZIC4
ZMAT2	ZKSCAN3
ZMYND11	ZKSCAN7
ZNF107	ZMAT1
ZNF124	ZMIZ2
ZNF175	ZMYM2
ZNF215	ZMYM6
ZNF275	ZNF117
ZNF280C	ZNF134
ZNF354B	ZNF136
ZNF365	ZNF137P
ZNF367	ZNF138
ZNF407	ZNF14
ZNF451	ZNF140
ZNF488	ZNF155
ZNF519	ZNF160
ZNF526	ZNF165
ZNF574	ZNF185
ZNF587B	ZNF19
ZNF592	ZNF204P
ZNF593	ZNF222
ZNF598	ZNF224
ZNF638	ZNF225
ZNF668	ZNF232
ZNF696	ZNF234
ZNF700	ZNF250
ZNF703	ZNF251
ZNF789	ZNF253
ZNHIT1	ZNF254
ZNHIT6	ZNF264
ZUFSP	ZNF266
ZW10	ZNF268
	ZNF286A
	ZNF302
	ZNF304
	ZNF320
	ZNF326
	ZNF33B
	ZNF354C
	ZNF37BP
	ZNF382
	ZNF385B
	ZNF385D
	ZNF391
	ZNF396
	ZNF397
	ZNF410
	ZNF416
	ZNF419
	ZNF420
	ZNF426
	ZNF431
	ZNF440
	ZNF510
	ZNF514
	ZNF518B
	ZNF529
	ZNF536
	ZNF543
	ZNF546
	ZNF548
	ZNF562
	ZNF567
	ZNF573
	ZNF599
	ZNF606
	ZNF621
	ZNF625
	ZNF658
	ZNF697
	ZNF704
	ZNF711
	ZNF718
	ZNF732
	ZNF75A
	ZNF776
	ZNF793
	ZNF813
	ZNF814
	ZNF827
	ZNF83
	ZNF836
	ZNF84
	ZNF85
	ZNF852
	ZNF853
	ZNF862
	ZRANB1
	ZRANB3
	ZSCAN16
	ZSCAN18
	ZSCAN30
	ZSWIM4
	ZXDA
	ZXDB
	ZXDC
	ZYX

## Sheet: Upregulated Probes ρ0 v ρ+
Probe Set ID	Transcript ID (Array Design)	Gene Symbol	Gene Title	log2FC ρ(0CTL)/ρ(+)	Fold-Change ρ(0CTL)/ρ(+)	FDR p-value ρ(0CTL)/ρ(+)
205434_s_at	Hs.135941.0	AAK1	AP2 associated kinase 1	0.889	1.85189	0.022935
209165_at	g5813798	AATF	apoptosis antagonizing transcription factor	1.062	2.08782	0.001767
216066_at	Hs.211562.1	ABCA1	ATP binding cassette subfamily A member 1	0.888	1.85061	0.021726
223320_s_at	g12751097	ABCB10	ATP binding cassette subfamily B member 10	0.88	1.84038	0.024832
1558460_at	Hs2.348628.1	ABCC5	ATP binding cassette subfamily C member 5	1.218	2.32624	0.011827
209247_s_at	g12804500	ABCF2	ATP binding cassette subfamily F member 2	1.161	2.23612	0.000997
207622_s_at	g10947136	ABCF2	ATP binding cassette subfamily F member 2	1.042	2.05908	0.002172
224742_at	Hs.236522.0	ABHD12	abhydrolase domain containing 12	0.733	1.66209	0.015601
235348_at	Hs.97852.0	ABHD13	abhydrolase domain containing 13	0.842	1.79253	0.005884
63825_at	4868127_RC	ABHD2	abhydrolase domain containing 2	0.792	1.73147	0.035508
218405_at	g7019318	ABT1	activator of basal transcription 1	0.856	1.81001	0.008442
214358_at	Hs.7232.1	ACACA	acetyl-CoA carboxylase alpha	1.342	2.53503	0.002604
225542_at	Hs.21446.0	ACAP3	ArfGAP with coiled-coil, ankyrin repeat and PH domains 3	0.709	1.63467	0.020954
200793_s_at	g4501866	ACO2	aconitase 2, mitochondrial	1.665	3.17114	0.000815
208002_s_at	g6857796	ACOT7	acyl-CoA thioesterase 7	1.144	2.20993	0.018329
236514_at	Hs.6511.0	ACOT8	acyl-CoA thioesterase 8	1.415	2.6666	0.022461
205364_at	g4501868	ACOX2	acyl-CoA oxidase 2, branched chain	1.216	2.32302	0.025903
214957_at	Hs.2149.0	ACTL8	actin-like 8	0.78	1.71713	0.011429
200601_at	g3157975	ACTN4	actinin, alpha 4	0.772	1.70764	0.031761
222162_s_at	Hs.8230.1	ADAMTS1	ADAM metallopeptidase with thrombospondin type 1 motif 1	1.7	3.24901	0.031153
222486_s_at	g5725505	ADAMTS1	ADAM metallopeptidase with thrombospondin type 1 motif 1	1.601	3.03354	0.034762
238125_at	Hs.205299.0	ADAMTS16	ADAM metallopeptidase with thrombospondin type 1 motif 16	0.853	1.80625	0.027484
214535_s_at	Hs.120330.1	ADAMTS2	ADAM metallopeptidase with thrombospondin type 1 motif 2	1.882	3.68586	0.001065
235368_at	Hs.81796.0	ADAMTS5	ADAM metallopeptidase with thrombospondin type 1 motif 5	0.786	1.72429	0.041731
220866_at	g7656868	ADAMTS6	ADAM metallopeptidase with thrombospondin type 1 motif 6	1.612	3.05675	0.043963
235649_at	Hs.126758.0	ADAMTS8	ADAM metallopeptidase with thrombospondin type 1 motif 8	0.688	1.61105	0.048844
201786_s_at	g7669471	ADAR	adenosine deaminase, RNA-specific	1.117	2.16895	0.006606
209321_s_at	g4104225	ADCY3	adenylate cyclase 3	1.06	2.08493	0.001382
226690_at	Hs.4748.1	ADCYAP1R1	adenylate cyclase activating polypeptide 1 (pituitary) receptor type I	2.673	6.37754	0.001493
207151_at	g4501922	ADCYAP1R1	adenylate cyclase activating polypeptide 1 (pituitary) receptor type I	1.872	3.6604	0.009484
230988_at	Hs.15155.0	ADD2	adducin 2 (beta)	0.753	1.68529	0.046594
221814_at	Hs.17270.0	ADGRA2	adhesion G protein-coupled receptor A2	1.308	2.47598	0.000608
65718_at	4885918_RC	ADGRA2	adhesion G protein-coupled receptor A2	1.187	2.27679	0.000608
209867_s_at	g11037015	ADGRL3	adhesion G protein-coupled receptor L3	1.153	2.22376	0.023723
217748_at	g7705760	ADIPOR1	adiponectin receptor 1	0.71	1.6358	0.01752
205891_at	g4501950	ADORA2B	adenosine A2b receptor	1.304	2.46913	0.029357
209869_at	g13447750	ADRA2A	adrenoceptor alpha 2A	0.684	1.60659	0.03877
206128_at	Hs.123022.0	ADRA2C	adrenoceptor alpha 2C	0.855	1.80876	0.008616
210250_x_at	g3211983	ADSL	adenylosuccinate lyase	0.677	1.59881	0.012647
227310_at	Hs.90011.1	ADSS	adenylosuccinate synthase	0.828	1.77522	0.048343
219361_s_at	g12232442	AEN	apoptosis enhancing nuclease	0.906	1.87384	0.011223
216364_s_at	Hs.54472.2	AFF2	AF4/FMR2 family, member 2	1.224	2.33593	0.009004
210957_s_at	g1313885	AFF2	AF4/FMR2 family, member 2	0.867	1.82387	0.044029
202486_at	g5802969	AFG3L2	AFG3-like AAA ATPase 2	1.308	2.47598	0.000746
1557820_at	Hs2.416822.1	AFG3L2	AFG3-like AAA ATPase 2	0.961	1.94666	0.006689
232919_at	Hs.287495.0	AFG3L2	AFG3-like AAA ATPase 2	0.652	1.57135	0.027468
1554618_at	Hs2.278502.2	AGFG2	ArfGAP with FG repeats 2	1.813	3.51372	0.019832
222126_at	Hs.251678.0	AGFG2	ArfGAP with FG repeats 2	1.069	2.09798	0.019003
218096_at	g8922941	AGPAT5	1-acylglycerol-3-phosphate O-acyltransferase 5	1.445	2.72263	0.0137
232007_at	Hs.281895.0	AGPAT5	1-acylglycerol-3-phosphate O-acyltransferase 5	0.919	1.8908	0.025688
214766_s_at	Hs.33363.1	AHCTF1	AT hook containing transcription factor 1	1.155	2.22684	0.002251
226115_at	Hs.33363.0	AHCTF1	AT hook containing transcription factor 1	1.039	2.0548	0.000975
205512_s_at	g4757731	AIFM1	apoptosis-inducing factor, mitochondrion-associated, 1	0.651	1.57026	0.04385
202542_s_at	g4758265	AIMP1	aminoacyl tRNA synthetase complex-interacting multifunctional protein 1	0.665	1.58557	0.030899
212174_at	Hs.171811.2	AK2	adenylate kinase 2	0.87	1.82766	0.023573
204151_x_at	g5453542	AKR1C1	aldo-keto reductase family 1, member C1	2.377	5.19455	0.001767
216594_x_at	Hs.306098.1	AKR1C1	aldo-keto reductase family 1, member C1	1.829	3.55291	0.000608
209699_x_at	g531159	AKR1C2	aldo-keto reductase family 1, member C2	2.45	5.46416	0.00135
211653_x_at	g187444	AKR1C2	aldo-keto reductase family 1, member C2	1.983	3.95314	3.3e-05
209160_at	g6624210	AKR1C3	aldo-keto reductase family 1, member C3	2.644	6.25062	8.7e-05
202139_at	g4502020	AKR7A2	aldo-keto reductase family 7, member A2	0.674	1.59549	0.023291
1569362_at	Hs2.435844.1	ALCAM	activated leukocyte cell adhesion molecule	1.726	3.30809	0.002172
203180_at	g4502040	ALDH1A3	aldehyde dehydrogenase 1 family, member A3	1.685	3.2154	0.001414
208950_s_at	g12803386	ALDH7A1	aldehyde dehydrogenase 7 family, member A1	0.802	1.74352	0.017599
207396_s_at	g5031952	ALG3	ALG3, alpha-1,3- mannosyltransferase	0.924	1.89737	0.033958
1556911_at	Hs2.340140.1	ALMS1-IT1	ALMS1 intronic transcript 1	1.91	3.75809	0.002611
232184_at	Hs.149391.0	ALS2	ALS2, alsin Rho guanine nucleotide exchange factor	1.508	2.84415	0.001272
226320_at	Hs.241520.0	ALYREF	Aly/REF export factor	0.768	1.70291	0.042423
226319_s_at	Hs.241520.0	ALYREF	Aly/REF export factor	0.701	1.62563	0.030987
52731_at	4849365_RC	AMBRA1	autophagy/beclin-1 regulator 1	0.644	1.56266	0.022329
236760_at	Hs.17643.0	AMMECR1	Alport syndrome, mental retardation, midface hypoplasia and elliptocytosis chromosomal region gene 1	1.254	2.38502	0.049212
1553219_a_at	Hs2.326142.1	AMMECR1	Alport syndrome, mental retardation, midface hypoplasia and elliptocytosis chromosomal region gene 1	0.806	1.74836	0.008729
205609_at	g4502086	ANGPT1	angiopoietin 1	1.483	2.79529	0.024607
205608_s_at	g1907326	ANGPT1	angiopoietin 1	1.161	2.23612	0.023113
237261_at	Hs.71832.0	ANGPT2	angiopoietin 2	2.296	4.91094	0.045896
205572_at	g4557314	ANGPT2	angiopoietin 2	2.035	4.09823	0.004836
236034_at	Hs.68301.0	ANGPT2	angiopoietin 2	1.955	3.87716	0.039456
211148_s_at	g8570646	ANGPT2	angiopoietin 2	1.866	3.64521	0.010221
208353_x_at	g10947047	ANK1	ankyrin 1, erythrocytic	0.805	1.74715	0.023404
205391_x_at	g178645	ANK1	ankyrin 1, erythrocytic	0.789	1.72788	0.037626
207087_x_at	g10947043	ANK1	ankyrin 1, erythrocytic	0.75	1.68179	0.033971
208352_x_at	g10947045	ANK1	ankyrin 1, erythrocytic	0.746	1.67714	0.030978
229058_at	Hs.98710.0	ANKRD16	ankyrin repeat domain 16	0.941	1.91986	0.02814
242116_x_at	Hs.240722.0	ANKRD17	ankyrin repeat domain 17	1.544	2.91602	0.000334
1559170_at	Hs2.364456.1	ANKRD20A5P	ankyrin repeat domain 20 family, member A5, pseudogene	0.815	1.7593	0.014877
231847_at	Hs.135259.0	ANKRD54	ankyrin repeat domain 54	0.868	1.82513	0.011295
218804_at	g8922319	ANO1	anoctamin 1, calcium activated chloride channel	1.65	3.13834	0.017325
1555269_a_at	Hs2.26176.2	ANO1	anoctamin 1, calcium activated chloride channel	1.073	2.1038	0.009016
229313_at	Hs.42721.0	ANO5	anoctamin 5	1.482	2.79336	0.012165
202888_s_at	g4502094	ANPEP	alanyl (membrane) aminopeptidase	1.454	2.73967	0.004525
201012_at	g4502100	ANXA1	annexin A1	0.83	1.77769	0.047537
1568126_at	Hs2.435459.1	ANXA2	annexin A2	1.018	2.02511	0.047935
200982_s_at	g4809274	ANXA6	annexin A6	1.23	2.34567	0.004458
205083_at	g6598319	AOX1	aldehyde oxidase 1	1.137	2.19923	0.015291
230925_at	Hs.122910.0	APBB1IP	amyloid beta (A4) precursor protein-binding, family B, member 1 interacting protein	1.897	3.72438	0.000269
219994_at	g9506856	APBB1IP	amyloid beta (A4) precursor protein-binding, family B, member 1 interacting protein	1.18	2.26577	0.009477
235548_at	Hs.119286.0	APCDD1L	adenomatosis polyposis coli down-regulated 1-like	1.671	3.18435	0.000997
204408_at	g7656891	APEX2	APEX nuclease (apurinic/apyrimidinic endonuclease) 2	1.023	2.03214	0.009011
214960_at	Hs.227913.1	API5	apoptosis inhibitor 5	1.444	2.72074	0.008795
213454_at	Hs.44205.1	APITD1	apoptosis-inducing, TAF9-like domain 1	0.77	1.70527	0.030182
225427_s_at	Hs.6880.3	APOA1BP	apolipoprotein A-I binding protein	0.968	1.95613	0.017377
206632_s_at	g4758159	APOBEC3B	apolipoprotein B mRNA editing enzyme, catalytic polypeptide-like 3B	1.647	3.13182	0.011638
204416_x_at	g5174774	APOC1	apolipoprotein C-I	0.694	1.61776	0.010908
227431_at	Hs.65828.0	APTR	Alu-mediated CDKN1A/p21 transcriptional regulator (non-protein coding)	0.877	1.83655	0.002509
211110_s_at	g5639998	AR	androgen receptor	0.909	1.87774	0.018665
226197_at	Hs.76704.0	AR	androgen receptor	0.854	1.80751	0.035783
226192_at	Hs.76704.0	AR	androgen receptor	0.647	1.56591	0.018466
211621_at	g178655	AR	androgen receptor	0.638	1.55617	0.049042
208750_s_at	Hs.74571.0	ARF1	ADP-ribosylation factor 1	0.854	1.80751	0.030603
200065_s_at	g3360490	ARF1	ADP-ribosylation factor 1	0.763	1.69702	0.042366
200734_s_at	Hs.119177.0	ARF3	ADP-ribosylation factor 3	1.22	2.32947	0.005596
216689_x_at	Hs.138860.1	ARHGAP1	Rho GTPase activating protein 1	0.847	1.79876	0.005656
202117_at	Hs.138860.0	ARHGAP1	Rho GTPase activating protein 1	0.739	1.66902	0.00699
204492_at	g7661857	ARHGAP11A	Rho GTPase activating protein 11A	1.22	2.32947	0.019753
203431_s_at	g7662261	ARHGAP32	Rho GTPase activating protein 32	0.757	1.68997	0.032992
204425_at	g11386132	ARHGAP4	Rho GTPase activating protein 4	1.412	2.66106	0.001262
222121_at	Hs.240845.1	ARHGEF26	Rho guanine nucleotide exchange factor 26	0.694	1.61776	0.011885
229642_at	Hs.117494.0	ARHGEF7	Rho guanine nucleotide exchange factor 7	0.843	1.79378	0.042246
210649_s_at	g11320941	ARID1A	AT rich interactive domain 1A (SWI-like)	0.692	1.61552	0.048761
227932_at	Hs.241558.1	ARIH2	ariadne RBR E3 ubiquitin protein ligase 2	1.36	2.56685	0.002604
213759_at	Hs.111554.1	ARL4C	ADP-ribosylation factor like GTPase 4C	1.101	2.14503	0.039415
202207_at	Hs.111554.0	ARL4C	ADP-ribosylation factor like GTPase 4C	0.895	1.85961	0.00718
202206_at	Hs.111554.0	ARL4C	ADP-ribosylation factor like GTPase 4C	0.823	1.76908	0.011331
223794_at	g12053222	ARMC4	armadillo repeat containing 4	1.916	3.77375	0.006439
1554030_at	Hs2.1256.2	ARSB	arylsulfatase B	1.246	2.37183	0.032674
213902_at	Hs.75811.2	ASAH1	N-acylsphingosine amidohydrolase (acid ceramidase) 1	1.057	2.0806	0.003791
236533_at	Hs.199057.0	ASAP1	ArfGAP with SH3 domain, ankyrin repeat and PH domain 1	0.843	1.79378	0.017137
224796_at	Hs.10669.1	ASAP1	ArfGAP with SH3 domain, ankyrin repeat and PH domain 1	0.673	1.59438	0.007722
224790_at	Hs.10669.1	ASAP1	ArfGAP with SH3 domain, ankyrin repeat and PH domain 1	0.67	1.59107	0.018054
224791_at	Hs.10669.1	ASAP1	ArfGAP with SH3 domain, ankyrin repeat and PH domain 1	0.65	1.56917	0.025386
221039_s_at	g8923867	ASAP1	ArfGAP with SH3 domain, ankyrin repeat and PH domain 1	0.638	1.55617	0.01728
231269_at	Hs.143917.0	ASCC3	activating signal cointegrator 1 complex subunit 3	1.266	2.40494	0.001578
218115_at	g8922548	ASF1B	anti-silencing function 1B histone chaperone	0.918	1.88949	0.026834
222667_s_at	Hs.102652.0	ASH1L	ash1 (absent, small, or homeotic)-like (Drosophila)	1.273	2.41664	0.002873
209517_s_at	g4417209	ASH2L	ash2 (absent, small, or homeotic)-like (Drosophila)	0.722	1.64947	0.031531
232238_at	Hs.145479.0	ASPM	abnormal spindle microtubule assembly	0.818	1.76296	0.013921
209693_at	g6502572	ASTN2	astrotactin 2	1.515	2.85799	0.019703
215407_s_at	Hs.30898.1	ASTN2	astrotactin 2	0.908	1.87644	0.016936
222740_at	Hs.46677.0	ATAD2	ATPase family, AAA domain containing 2	1.413	2.6629	0.021893
218782_s_at	g7662630	ATAD2	ATPase family, AAA domain containing 2	1.167	2.24544	0.039506
235266_at	Hs.222088.0	ATAD2	ATPase family, AAA domain containing 2	1.121	2.17498	0.02784
227700_x_at	Hs.273357.1	ATAD3A	ATPase family, AAA domain containing 3A	1.1	2.14355	0.011169
219068_x_at	g8922608	ATAD3A	ATPase family, AAA domain containing 3A	0.912	1.88165	0.02476
227237_x_at	Hs.23413.1	ATAD3B	ATPase family, AAA domain containing 3B	1.203	2.30218	0.041133
223617_x_at	g12803436	ATAD3B	ATPase family, AAA domain containing 3B	1.068	2.09652	0.025815
220223_at	g13376283	ATAD5	ATPase family, AAA domain containing 5	0.855	1.80876	0.046961
232612_s_at	Hs.16390.2	ATG16L1	autophagy related 16-like 1	0.903	1.86995	0.003435
218673_s_at	g5453667	ATG7	autophagy related 7	0.773	1.70882	0.034269
1558706_a_at	Hs2.50963.1	ATOH8	atonal bHLH transcription factor 8	1.187	2.27679	0.015755
203454_s_at	g4757803	ATOX1	antioxidant 1 copper chaperone	1.23	2.34567	0.01728
214255_at	Hs.44697.0	ATP10A	ATPase, class V, type 10A	1.698	3.24451	0.035445
214432_at	Hs.274371.0	ATP1A3	ATPase, Na+/K+ transporting, alpha 3 polypeptide	1.558	2.94445	0.002606
201242_s_at	g12652534	ATP1B1	ATPase, Na+/K+ transporting, beta 1 polypeptide	1.488	2.805	0.017518
201322_at	g4502294	ATP5B	ATP synthase, H+ transporting, mitochondrial F1 complex, beta polypeptide	0.653	1.57243	0.040759
208972_s_at	g5262506	ATP5G1	ATP synthase, H+ transporting, mitochondrial Fo complex subunit C1 (subunit 9)	1.028	2.0392	0.016019
1564482_at	Hs2.412875.1	ATP5O	ATP synthase, H+ transporting, mitochondrial F1 complex, O subunit	0.766	1.70055	0.049135
200954_at	g4502312	ATP6V0C	ATPase, H+ transporting, lysosomal 16kDa, V0 subunit c	0.765	1.69937	0.017354
202872_at	Hs.86905.0	ATP6V1C1	ATPase, H+ transporting, lysosomal 42kDa, V1 subunit C1	0.71	1.6358	0.020329
1552937_s_at	Hs2.278408.4	ATRIP	ATR interacting protein	1.046	2.0648	0.005174
222946_s_at	g12652906	AUNIP	aurora kinase A and ninein interacting protein	0.875	1.83401	0.041832
220011_at	g13128989	AUNIP	aurora kinase A and ninein interacting protein	0.841	1.79129	0.021692
225555_x_at	Hs.76239.1	AURKAIP1	aurora kinase A interacting protein 1	1.114	2.16445	0.003078
218580_x_at	g8923564	AURKAIP1	aurora kinase A interacting protein 1	0.987	1.98206	0.008795
225552_x_at	Hs.76239.1	AURKAIP1	aurora kinase A interacting protein 1	0.96	1.94531	0.012678
202685_s_at	Hs.83341.1	AXL	AXL receptor tyrosine kinase	0.843	1.79378	0.010754
201772_at	g7706219	AZIN1	antizyme inhibitor 1	0.757	1.68997	0.025153
1561714_a_at	Hs2.97509.2	B3GALNT2	beta-1,3-N-acetylgalactosaminyltransferase 2	1.166	2.24389	0.012094
217452_s_at	Hs.181353.1	B3GALT2	UDP-Gal:betaGlcNAc beta 1,3-galactosyltransferase 2	1.205	2.30537	0.008941
210121_at	g12620189	B3GALT2	UDP-Gal:betaGlcNAc beta 1,3-galactosyltransferase 2	0.827	1.77399	0.042835
219521_at	g12408651	B3GAT1	beta-1,3-glucuronyltransferase 1	0.983	1.97657	0.011161
209406_at	g4322819	BAG2	BCL2-associated athanogene 2	0.808	1.75078	0.014945
222909_s_at	g4160013	BAG4	BCL2-associated athanogene 4	1.012	2.0167	0.015911
228189_at	Hs.7859.0	BAG4	BCL2-associated athanogene 4	0.857	1.81127	0.048073
209502_s_at	g12803352	BAIAP2	BAI1-associated protein 2	1.216	2.32302	0.003393
205294_at	g9257196	BAIAP2	BAI1-associated protein 2	1.109	2.15696	0.010468
1559078_at	Hs2.371364.1	BCL11A	B-cell CLL/lymphoma 11A (zinc finger protein)	1.052	2.0734	0.027041
219497_s_at	g13375629	BCL11A	B-cell CLL/lymphoma 11A (zinc finger protein)	1.033	2.04627	0.004537
223915_at	g11907999	BCOR	BCL6 corepressor	1.282	2.43176	0.019687
207618_s_at	g4757851	BCS1L	BCS1 homolog, ubiquinol-cytochrome c reductase complex chaperone	0.795	1.73508	0.024077
213905_x_at	Hs.821.1	BGN	biglycan	1.537	2.9019	0.007945
201261_x_at	g12803216	BGN	biglycan	1.36	2.56685	0.007814
201262_s_at	g4502402	BGN	biglycan	1.349	2.54735	0.006526
1554020_at	Hs2.164975.2	BICD1	bicaudal D homolog 1 (Drosophila)	1.233	2.35055	0.003926
242228_at	Hs.246973.0	BICD1	bicaudal D homolog 1 (Drosophila)	1.033	2.04627	0.010484
214806_at	Hs.164975.2	BICD1	bicaudal D homolog 1 (Drosophila)	0.768	1.70291	0.048487
209203_s_at	g12803052	BICD2	bicaudal D homolog 2 (Drosophila)	0.647	1.56591	0.019395
1557582_at	Hs2.432486.1	BIN3	bridging integrator 3	1.731	3.31958	0.003147
222199_s_at	Hs.68090.1	BIN3	bridging integrator 3	1.03	2.04202	0.00875
202095_s_at	g4502144	BIRC5	baculoviral IAP repeat containing 5	0.969	1.95748	0.021644
1555826_at	Hs2.1578.4	BIRC5	baculoviral IAP repeat containing 5	0.911	1.88035	0.042601
210334_x_at	g7416052	BIRC5	baculoviral IAP repeat containing 5	0.88	1.84038	0.014197
202094_at	Hs.1578.0	BIRC5	baculoviral IAP repeat containing 5	0.827	1.77399	0.018599
1555675_at	Hs2Affx.1.429	BLID	BH3-like motif containing, cell death inducer	1.036	2.05053	0.021405
205733_at	g4557364	BLM	Bloom syndrome, RecQ helicase-like	0.919	1.8908	0.038145
205290_s_at	g4557368	BMP2	bone morphogenetic protein 2	1.51	2.8481	0.005466
205289_at	Hs.73853.0	BMP2	bone morphogenetic protein 2	1.311	2.48113	0.008609
1552487_a_at	Hs2.64025.1	BNC1	basonuclin 1	0.925	1.89868	0.008663
206581_at	g4502438	BNC1	basonuclin 1	0.656	1.57571	0.01303
37226_at	4875364_RC	BNIP1	BCL2/adenovirus E1B 19kDa interacting protein 1	0.867	1.82387	0.036364
204930_s_at	g7524349	BNIP1	BCL2/adenovirus E1B 19kDa interacting protein 1	0.711	1.63694	0.040256
227291_s_at	Hs.61472.1	BOLA3	bolA family member 3	1.093	2.13317	0.043616
212563_at	Hs.30736.0	BOP1	block of proliferation 1	1.527	2.88186	0.000727
219544_at	g13376190	BORA	bora, aurora kinase A activator	0.866	1.8226	0.04241
1553978_at	Hs2.78881.3	BORCS8	BLOC-1 related complex subunit 8	1.215	2.32141	0.017357
231953_at	Hs.99872.2	BPTF	bromodomain PHD finger transcription factor	0.872	1.8302	0.023102
204531_s_at	g6552300	BRCA1	breast cancer 1, early onset	1.114	2.16445	0.013501
211851_x_at	g2218153	BRCA1	breast cancer 1, early onset	0.669	1.58997	0.036919
208368_s_at	g4502450	BRCA2	breast cancer 2, early onset	0.924	1.89737	0.036032
218955_at	g8922843	BRF2	BRF2, RNA polymerase III transcription initiation factor 50 kDa subunit	1.157	2.22993	0.0008
218954_s_at	g11096174	BRF2	BRF2, RNA polymerase III transcription initiation factor 50 kDa subunit	0.75	1.68179	0.021773
219177_at	g8922864	BRIX1	BRX1, biogenesis of ribosomes	0.727	1.65519	0.017234
215631_s_at	Hs.306186.0	BRMS1	breast cancer metastasis suppressor 1	0.82	1.76541	0.018825
215508_at	Hs.194110.2	BUB1	BUB1 mitotic checkpoint serine/threonine kinase	0.684	1.60659	0.018567
205690_s_at	g4503836	BUD31	BUD31 homolog	0.679	1.60103	0.017178
203612_at	g4757881	BYSL	bystin-like	1.106	2.15248	0.0022
52164_at	4872736_RC	C11orf24	chromosome 11 open reading frame 24	0.937	1.91454	0.027248
1553787_at	Hs2.351133.1	C11orf45	chromosome 11 open reading frame 45	0.784	1.7219	0.02804
219022_at	g12597630	C12orf43	chromosome 12 open reading frame 43	0.81	1.75321	0.045961
1554466_a_at	Hs2.239500.2	C16orf13	chromosome 16 open reading frame 13	0.685	1.6077	0.021529
1558990_at	Hs2.430961.1	C18orf21	chromosome 18 open reading frame 21	1.24	2.36199	0.045246
221587_s_at	g12654144	C19orf24	chromosome 19 open reading frame 24	1.151	2.22068	0.025396
224468_s_at	g13544031	C19orf48	chromosome 19 open reading frame 48	0.786	1.72429	0.041863
231901_at	Hs.164026.0	C19orf52	chromosome 19 open reading frame 52	0.909	1.87774	0.00862
225823_at	Hs.10453.0	C19orf70	chromosome 19 open reading frame 70	0.789	1.72788	0.018495
218712_at	g8923468	C1orf109	chromosome 1 open reading frame 109	1.139	2.20228	0.004677
220840_s_at	g8922604	C1orf112	chromosome 1 open reading frame 112	0.847	1.79876	0.03748
225480_at	Hs.26683.0	C1orf122	chromosome 1 open reading frame 122	0.75	1.68179	0.015382
212791_at	Hs.112023.0	C1orf216	chromosome 1 open reading frame 216	0.633	1.55079	0.04212
218721_s_at	g8923461	C1orf27	chromosome 1 open reading frame 27	0.793	1.73267	0.01728
1555225_at	Hs2.355906.4	C1orf43	chromosome 1 open reading frame 43	1.174	2.25636	0.02378
219506_at	g13375757	C1orf54	chromosome 1 open reading frame 54	1.366	2.57755	0.03486
205103_at	g5453624	C1orf61	chromosome 1 open reading frame 61	1.445	2.72263	0.026133
243508_at	Hs.20304.2	C20orf196	chromosome 20 open reading frame 196	1.143	2.2084	0.025139
1553311_at	Hs2.171076.1	C20orf197	chromosome 20 open reading frame 197	2.693	6.46657	0.000501
219120_at	g13376797	C2orf44	chromosome 2 open reading frame 44	1.095	2.13613	0.014862
222551_s_at	Hs.169615.0	C8orf33	chromosome 8 open reading frame 33	0.781	1.71832	0.004731
218565_at	Hs.224137.0	C9orf114	chromosome 9 open reading frame 114	0.995	1.99308	0.0075
1559722_at	Hs2.434140.1	C9orf3	chromosome 9 open reading frame 3	1.007	2.00973	0.022108
218116_at	g7706556	C9orf78	chromosome 9 open reading frame 78	0.783	1.72071	0.027684
225532_at	Hs.17901.0	CABLES1	Cdk5 and Abl enzyme substrate 1	1.297	2.45717	0.02268
205845_at	g10864076	CACNA1H	calcium channel, voltage-dependent, T type, alpha 1H subunit	1.078	2.11111	0.022752
210691_s_at	g10834769	CACYBP	calcyclin binding protein	0.817	1.76174	0.039798
201381_x_at	g3063652	CACYBP	calcyclin binding protein	0.799	1.73989	0.035445
202715_at	g4757895	CAD	carbamoyl-phosphate synthetase 2, aspartate transcarbamylase, and dihydroorotase	1.035	2.04911	0.008631
205428_s_at	g6031158	CALB2	calbindin 2	0.811	1.75443	0.02814
201615_x_at	Hs.325474.0	CALD1	caldesmon 1	1.114	2.16445	0.025962
212077_at	Hs.182183.0	CALD1	caldesmon 1	1.028	2.0392	0.049599
201617_x_at	g11091984	CALD1	caldesmon 1	0.943	1.92252	0.047935
1554875_at	Hs2.374858.1	CAMKMT	calmodulin-lysine N-methyltransferase	1.341	2.53327	0.00162
243910_x_at	Hs.209521.0	CAND1	cullin-associated and neddylation-dissociated 1	0.862	1.81756	0.022399
208838_at	Hs.184786.0	CAND1	cullin-associated and neddylation-dissociated 1	0.815	1.7593	0.022196
210026_s_at	g13488606	CARD10	caspase recruitment domain family, member 10	1.466	2.76255	0.002353
214207_s_at	Hs.57973.1	CARD10	caspase recruitment domain family, member 10	0.792	1.73147	0.012743
1552335_at	Hs2.189105.1	CATSPER1	cation channel, sperm associated 1	0.676	1.5977	0.013363
203324_s_at	g4557412	CAV2	caveolin 2	1.621	3.07588	0.000144
213426_s_at	Hs.139851.1	CAV2	caveolin 2	1.153	2.22376	0.000596
203323_at	Hs.139851.0	CAV2	caveolin 2	0.758	1.69114	0.014966
220018_at	g13376203	CBLL1	Cbl proto-oncogene-like 1, E3 ubiquitin protein ligase	1.217	2.32463	0.01865
227187_at	Hs.44577.0	CBLL1	Cbl proto-oncogene-like 1, E3 ubiquitin protein ligase	0.672	1.59328	0.025236
240084_at	Hs.194049.0	CBX2	chromobox homolog 2	1.243	2.3669	0.023466
225187_at	Hs.181102.2	CCAR2	cell cycle and apoptosis regulator 2	0.724	1.65176	0.035547
225933_at	Hs.184456.1	CCDC137	coiled-coil domain containing 137	1.331	2.51577	0.019423
241360_at	Hs.116131.0	CCDC15	coiled-coil domain containing 15	0.926	1.9	0.027927
223316_at	g13276630	CCDC3	coiled-coil domain containing 3	1.416	2.66845	0.001382
222792_s_at	Hs.90527.0	CCDC59	coiled-coil domain containing 59	0.756	1.6888	0.019753
1553102_a_at	Hs2.209100.1	CCDC69	coiled-coil domain containing 69	2.232	4.69785	0.000712
212886_at	Hs.209100.0	CCDC69	coiled-coil domain containing 69	1.782	3.43903	0.001862
223495_at	Hs.97876.0	CCDC8	coiled-coil domain containing 8	1.141	2.20534	0.033845
223496_s_at	g12052743	CCDC8	coiled-coil domain containing 8	0.946	1.92652	0.007478
203119_at	g13129103	CCDC86	coiled-coil domain containing 86	1.463	2.75681	0.000286
238759_at	Hs.244532.0	CCDC88A	coiled-coil domain containing 88A	1.149	2.2176	0.02073
239233_at	Hs.97721.0	CCDC88A	coiled-coil domain containing 88A	1.083	2.11844	0.025056
225257_at	Hs.83532.3	CCDC97	coiled-coil domain containing 97	1.501	2.83039	0.014134
225254_at	Hs.83532.3	CCDC97	coiled-coil domain containing 97	0.779	1.71594	0.042832
214710_s_at	Hs.23960.2	CCNB1	cyclin B1	0.768	1.70291	0.02792
201700_at	g4502618	CCND3	cyclin D3	0.697	1.62113	0.026486
1554131_at	Hs2.81897.2	CCSER2	coiled-coil serine rich protein 2	1.761	3.38933	0.028425
201947_s_at	g5453602	CCT2	chaperonin containing TCP1, subunit 2 (beta)	0.843	1.79378	0.002136
201946_s_at	Hs.6456.0	CCT2	chaperonin containing TCP1, subunit 2 (beta)	0.811	1.75443	0.00353
200910_at	g5174726	CCT3	chaperonin containing TCP1, subunit 3 (gamma)	0.686	1.60882	0.005341
200812_at	g5453606	CCT7	chaperonin containing TCP1, subunit 7 (eta)	0.717	1.64376	0.017875
201743_at	g4557416	CD14	CD14 molecule	0.857	1.81127	0.040759
217422_s_at	Hs.171763.1	CD22	CD22 molecule	1.117	2.16895	0.019438
38521_at	4853636_RC	CD22	CD22 molecule	0.715	1.64148	0.014958
202257_s_at	g5174408	CD2BP2	CD2 (cytoplasmic tail) binding protein 2	1.315	2.48802	0.000795
206120_at	g4502654	CD33	CD33 molecule	2.124	4.35901	0.001242
205264_at	g6912245	CD3EAP	CD3e molecule, epsilon associated protein	1.438	2.70945	0.008114
229221_at	Hs.169610.2	CD44	CD44 molecule (Indian blood group)	2.441	5.43018	0.023291
217523_at	Hs.285173.0	CD44	CD44 molecule (Indian blood group)	1.733	3.32418	0.015298
212014_x_at	Hs.169610.3	CD44	CD44 molecule (Indian blood group)	1.089	2.12727	0.029664
209835_x_at	g13325117	CD44	CD44 molecule (Indian blood group)	1.014	2.0195	0.029849
210916_s_at	g3832517	CD44	CD44 molecule (Indian blood group)	0.974	1.96428	0.033945
204490_s_at	g180196	CD44	CD44 molecule (Indian blood group)	0.908	1.87644	0.023265
233564_s_at	Hs.49927.2	CDADC1	cytidine and dCMP deaminase domain containing 1	0.655	1.57462	0.048922
201725_at	g5174422	CDC123	cell division cycle 123	0.859	1.81378	0.010796
211347_at	g5706723	CDC14B	cell division cycle 14B	1.086	2.12285	0.029127
202870_s_at	g4557436	CDC20	cell division cycle 20	1.383	2.6081	0.003503
223651_x_at	g13528932	CDC23	cell division cycle 23	0.852	1.805	0.012848
204693_at	g5902007	CDC42EP1	CDC42 effector protein (Rho GTPase binding) 1	0.82	1.76541	0.025055
236957_at	Hs.117753.0	CDCA2	cell division cycle associated 2	1.564	2.95672	0.005427
226661_at	Hs.15091.0	CDCA2	cell division cycle associated 2	1.441	2.71509	0.008485
221436_s_at	g13876383	CDCA3	cell division cycle associated 3	1.171	2.25168	0.004901
223307_at	g12803452	CDCA3	cell division cycle associated 3	1.111	2.15995	0.004852
224753_at	Hs.23044.2	CDCA5	cell division cycle associated 5	1.183	2.27048	0.013693
221520_s_at	g12804484	CDCA8	cell division cycle associated 8	1.339	2.52976	0.007976
1554110_at	Hs2.146170.2	CDCP1	CUB domain containing protein 1	2.052	4.1468	0.015158
241780_at	Hs.56071.0	CDH11	cadherin 11, type 2, OB-cadherin (osteoblast)	1.132	2.19162	0.02606
225691_at	Hs.123073.1	CDK12	cyclin-dependent kinase 12	1.319	2.49493	0.028752
225690_at	Hs.123073.1	CDK12	cyclin-dependent kinase 12	1.207	2.30857	0.025653
219226_at	g7706548	CDK12	cyclin-dependent kinase 12	0.92	1.89212	0.034334
225697_at	Hs.123073.1	CDK12	cyclin-dependent kinase 12	0.882	1.84293	0.035186
225694_at	Hs.123073.1	CDK12	cyclin-dependent kinase 12	0.872	1.8302	0.042765
243000_at	Hs.209382.0	CDK6	cyclin-dependent kinase 6	0.998	1.99723	0.009417
224848_at	Hs.180059.0	CDK6	cyclin-dependent kinase 6	0.859	1.81378	0.039169
214804_at	Hs.123122.1	CENPI	centromere protein I	1.072	2.10235	0.038312
207590_s_at	g5803018	CENPI	centromere protein I	0.834	1.78262	0.024808
1554271_a_at	Hs2.117305.1	CENPL	centromere protein L	1.06	2.08493	0.020183
232065_x_at	Hs.117305.0	CENPL	centromere protein L	0.911	1.88035	0.003633
218741_at	g13129021	CENPM	centromere protein M	1.31	2.47942	0.008812
219555_s_at	g8922096	CENPN	centromere protein N	0.725	1.6529	0.047557
226118_at	Hs.8402.1	CENPO	centromere protein O	0.983	1.97657	0.029107
226936_at	Hs.35962.0	CENPW	centromere protein W	1.316	2.48975	0.014563
207719_x_at	g7662141	CEP170	centrosomal protein 170kDa	0.807	1.74957	0.021282
218827_s_at	g8922371	CEP192	centrosomal protein 192kDa	0.971	1.9602	0.011791
224794_s_at	Hs.23954.0	CERCAM	cerebral endothelial cell adhesion molecule	0.84	1.79005	0.024681
205937_at	g5729762	CGREF1	cell growth regulator with EF-hand domain 1	1.319	2.49493	0.012772
235117_at	Hs.105223.0	CHAC2	ChaC, cation transport regulator homolog 2 (E. coli)	1.096	2.13761	0.015049
229808_at	Hs.79018.1	CHAF1A	chromatin assembly factor 1, subunit A (p150)	1.285	2.43682	0.03624
214426_x_at	Hs.79018.2	CHAF1A	chromatin assembly factor 1, subunit A (p150)	1.055	2.07772	0.032915
204775_at	g4885104	CHAF1B	chromatin assembly factor 1, subunit B (p60)	0.799	1.73989	0.015291
222701_s_at	Hs.323164.0	CHCHD7	coiled-coil-helix-coiled-coil-helix domain containing 7	1.418	2.67215	0.021405
242157_at	Hs.325678.0	CHD9	chromodomain helicase DNA binding protein 9	0.989	1.98481	0.028923
202230_s_at	g11055968	CHERP	calcium homeostasis endoplasmic reticulum protein	0.707	1.63241	0.036683
1565951_s_at	Hs2.436389.1	CHML	choroideremia-like (Rab escort protein 2)	1.205	2.30537	0.010608
206079_at	g4502810	CHML	choroideremia-like (Rab escort protein 2)	0.978	1.96973	0.035668
226350_at	Hs.28661.0	CHML	choroideremia-like (Rab escort protein 2)	0.958	1.94261	0.027623
239436_at	Hs.312323.0	CHORDC1	cysteine and histidine rich domain containing 1	1.256	2.38833	0.032426
221107_at	g8923741	CHRNA9	cholinergic receptor, nicotinic alpha 9	0.908	1.87644	0.027259
226372_at	Hs.64001.0	CHST11	carbohydrate (chondroitin 4) sulfotransferase 11	1.788	3.45336	0.023147
219634_at	g8923757	CHST11	carbohydrate (chondroitin 4) sulfotransferase 11	1.761	3.38933	0.013309
226368_at	Hs.64001.0	CHST11	carbohydrate (chondroitin 4) sulfotransferase 11	1.371	2.5865	0.01411
32094_at	4864581	CHST3	carbohydrate (chondroitin 6) sulfotransferase 3	0.709	1.63467	0.045029
229610_at	Hs.99807.0	CKAP2L	cytoskeleton associated protein 2-like	0.84	1.79005	0.012313
212832_s_at	Hs.76989.0	CKAP5	cytoskeleton associated protein 5	0.871	1.82893	0.010765
201897_s_at	g4502856	CKS1B	CDC28 protein kinase regulatory subunit 1B	1.508	2.84415	0.003967
211709_s_at	g13543291	CLEC11A	C-type lectin domain family 11, member A	2.486	5.60223	2.7e-05
210783_x_at	g2257694	CLEC11A	C-type lectin domain family 11, member A	1.542	2.91198	0.00135
205131_x_at	g4506802	CLEC11A	C-type lectin domain family 11, member A	1.197	2.29262	0.002814
201768_s_at	g13325306	CLINT1	clathrin interactor 1	0.766	1.70055	0.00483
1568836_at	Hs2.401054.1	CLK4	CDC like kinase 4	0.917	1.88818	0.003413
228082_at	Hs.135121.0	CLMP	CXADR-like membrane protein	1.535	2.89788	0.00068
226834_at	Hs.28462.0	CLMP	CXADR-like membrane protein	1.46	2.75108	0.002136
1567080_s_at	Hs2.403812.1	CLN6	ceroid-lipofuscinosis, neuronal 6, late infantile, variant	1.831	3.55784	0.026209
218161_s_at	g8923531	CLN6	ceroid-lipofuscinosis, neuronal 6, late infantile, variant	1.682	3.20872	0.019499
222874_s_at	g6467260	CLN8	ceroid-lipofuscinosis, neuronal 8	1.407	2.65185	0.041953
221845_s_at	Hs.21263.1	CLPB	ClpB homolog, mitochondrial AAA ATPase chaperonin	1.065	2.09217	0.013543
211043_s_at	g13623458	CLTB	clathrin, light chain B	0.988	1.98343	0.026384
221996_s_at	Hs.73919.2	CLTB	clathrin, light chain B	0.937	1.91454	0.0052
206284_x_at	g4502900	CLTB	clathrin, light chain B	0.894	1.85832	0.011696
205172_x_at	g6005994	CLTB	clathrin, light chain B	0.774	1.71	0.009056
1562460_at	Hs2.379558.1	CNDP2	CNDP dipeptidase 2 (metallopeptidase M20 family)	1.007	2.00973	0.008186
222721_at	Hs.108854.0	CNIH4	cornichon family AMPA receptor auxiliary protein 4	1.253	2.38337	0.007158
201605_x_at	g4758017	CNN2	calponin 2	0.635	1.55294	0.030394
233054_at	Hs.239720.2	CNOT2	CCR4-NOT transcription complex subunit 2	1.12	2.17347	0.024763
203291_at	g7019466	CNOT4	CCR4-NOT transcription complex subunit 4	1.167	2.24544	0.022825
227209_at	Hs.143434.2	CNTN1	contactin 1	1.169	2.24856	0.044075
211203_s_at	g469044	CNTN1	contactin 1	0.932	1.90792	0.029745
242916_at	Hs.191649.0	CNTRL	centriolin	0.885	1.84676	0.006676
219420_s_at	g12751490	COA7	cytochrome c oxidase assembly factor 7 (putative)	1.074	2.10526	0.003912
243608_at	Hs.226925.0	COG2	component of oligomeric golgi complex 2	0.705	1.63014	0.031888
204345_at	g11386158	COL16A1	collagen, type XVI, alpha 1	0.69	1.61328	0.018512
243301_at	Hs.122254.0	COL22A1	collagen, type XXII, alpha 1	5.001	32.0222	3.9e-05
242326_at	Hs.116394.0	COL22A1	collagen, type XXII, alpha 1	4.509	22.769	3.7e-05
228873_at	Hs.128644.0	COL22A1	collagen, type XXII, alpha 1	3.719	13.1683	0.002641
229168_at	Hs.55407.0	COL23A1	collagen, type XXIII, alpha 1	2.241	4.72725	0.000949
52255_s_at	4826393_RC	COL5A3	collagen, type V, alpha 3	2.946	7.7061	0.011161
212939_at	Hs.25459.0	COL6A1	collagen, type VI, alpha 1	1.375	2.59368	0.029995
212091_s_at	Hs.108885.1	COL6A1	collagen, type VI, alpha 1	1.239	2.36035	0.04415
212940_at	Hs.25459.0	COL6A1	collagen, type VI, alpha 1	1.19	2.28153	0.045348
217312_s_at	Hs.1640.1	COL7A1	collagen, type VII, alpha 1	2.325	5.01066	0.011542
204136_at	g4502960	COL7A1	collagen, type VII, alpha 1	2.304	4.93825	0.015755
223457_at	g11094284	COPG2	coatomer protein complex subunit gamma 2	0.697	1.62113	0.019594
213504_at	Hs.15591.1	COPS6	COP9 signalosome subunit 6	1.311	2.48113	0.001382
214260_at	Hs.75193.1	COPS8	COP9 signalosome subunit 8	0.867	1.82387	0.017688
206848_at	g5901971	COX20	COX20 cytochrome c oxidase assembly factor	0.697	1.62113	0.043921
227323_at	Hs.173162.1	COX4I1	cytochrome c oxidase subunit IV isoform 1	0.664	1.58447	0.02026
229426_at	Hs.181028.2	COX5A	cytochrome c oxidase subunit Va	1.022	2.03073	0.00724
217191_x_at	Hs.248205.0	COX6CP1	cytochrome c oxidase subunit VIc pseudogene 1	0.792	1.73147	0.037187
201119_s_at	g4758043	COX8A	cytochrome c oxidase subunit VIIIA (ubiquitous)	1.141	2.20534	0.037637
223500_at	g12803306	CPLX1	complexin 1	0.836	1.78509	0.028046
202575_at	g6382069	CRABP2	cellular retinoic acid binding protein 2	1.162	2.23767	0.044333
201380_at	g5453600	CRTAP	cartilage associated protein	0.858	1.81252	0.029357
210766_s_at	g3560554	CSE1L	CSE1 chromosome segregation 1-like (yeast)	0.833	1.78139	0.002476
201112_s_at	g4503072	CSE1L	CSE1 chromosome segregation 1-like (yeast)	0.729	1.65749	0.008542
227105_at	Hs.153746.1	CSPP1	centrosome and spindle pole associated protein 1	1.343	2.53678	0.016973
1554873_at	Hs2.374861.1	CSPP1	centrosome and spindle pole associated protein 1	1.018	2.02511	0.012531
221925_s_at	Hs.153746.1	CSPP1	centrosome and spindle pole associated protein 1	0.898	1.86348	0.033448
220072_at	g13376157	CSPP1	centrosome and spindle pole associated protein 1	0.878	1.83783	0.041053
201360_at	g4503106	CST3	cystatin C	0.712	1.63807	0.021405
204459_at	g4557492	CSTF2	cleavage stimulation factor, 3' pre-RNA, subunit 2	0.727	1.65519	0.033482
229665_at	Hs.180034.1	CSTF3	cleavage stimulation factor, 3' pre-RNA, subunit 3	0.996	1.99446	0.044165
214074_s_at	Hs.119257.2	CTTN	cortactin	0.643	1.56157	0.027455
226410_at	Hs.169850.0	CTU2	cytosolic thiouridylase subunit 2 homolog (S. pombe)	0.852	1.805	0.019957
202213_s_at	Hs.155976.0	CUL4B	cullin 4B	0.914	1.88426	0.037603
202214_s_at	g13270466	CUL4B	cullin 4B	0.832	1.78015	0.027846
228916_at	Hs.24380.0	CWF19L2	CWF19-like 2, cell cycle control (S. pombe)	1.012	2.0167	0.039583
209687_at	g1754834	CXCL12	chemokine (C-X-C motif) ligand 12	2.869	7.30559	3.5e-05
203666_at	g10834987	CXCL12	chemokine (C-X-C motif) ligand 12	1.777	3.42713	0.00383
219805_at	g11545812	CXorf56	chromosome X open reading frame 56	0.709	1.63467	0.019317
1554574_a_at	Hs2.274464.3	CYB5R3	cytochrome b5 reductase 3	1.133	2.19314	0.000839
201885_s_at	g6552326	CYB5R3	cytochrome b5 reductase 3	0.789	1.72788	0.005534
235991_at	Hs.133407.0	CYB5RL	cytochrome b5 reductase-like	0.771	1.70645	0.028317
201066_at	g4503184	CYC1	cytochrome c-1	0.937	1.91454	0.016946
205749_at	g13325053	CYP1A1	cytochrome P450, family 1, subfamily A, polypeptide 1	1.832	3.5603	0.003002
217133_x_at	Hs.1360.1	CYP2B6	cytochrome P450, family 2, subfamily B, polypeptide 6	0.677	1.59881	0.021116
214235_at	Hs.166079.0	CYP3A5	cytochrome P450, family 3, subfamily A, polypeptide 5	1.291	2.44698	0.024623
208822_s_at	g603763	DAP3	death associated protein 3	1.294	2.45207	0.000379
204244_s_at	g5729733	DBF4	DBF4 zinc finger	0.805	1.74715	0.023797
222429_at	g8885629	DBNL	drebrin-like	0.799	1.73989	0.002604
1568840_at	Hs2.398195.1	DCAF13	DDB1 and CUL4 associated factor 13	1.153	2.22376	0.048664
231784_s_at	Hs.273344.2	DCAF13	DDB1 and CUL4 associated factor 13	1.032	2.04486	0.004921
225676_s_at	Hs.273344.1	DCAF13	DDB1 and CUL4 associated factor 13	0.85	1.8025	0.004021
238914_at	Hs.162025.0	DCC	DCC netrin 1 receptor	3.058	8.32817	0.000577
206939_at	g4885174	DCC	DCC netrin 1 receptor	3.014	8.07801	6.5e-05
229800_at	Hs.48713.0	DCLK1	doublecortin-like kinase 1	2.127	4.36808	0.032322
215303_at	Hs.159412.0	DCLK1	doublecortin-like kinase 1	1.715	3.28297	0.002486
205399_at	g4758127	DCLK1	doublecortin-like kinase 1	1.443	2.71886	0.007529
230962_at	Hs.129997.0	DCLK1	doublecortin-like kinase 1	0.847	1.79876	0.027041
235478_at	Hs.14665.0	DCLRE1C	DNA cross-link repair 1C	0.863	1.81882	0.020128
242927_at	Hs.311638.0	DCLRE1C	DNA cross-link repair 1C	0.847	1.79876	0.003607
218774_at	g7661733	DCPS	decapping enzyme, scavenger	1.691	3.2288	0.006925
221266_s_at	g13540564	DCSTAMP	dendrocyte expressed seven transmembrane protein	1.519	2.86592	0.00613
228281_at	Hs.165607.0	DDIAS	DNA damage-induced apoptosis suppressor	1.257	2.38998	0.008742
201241_at	g4826685	DDX1	DEAD (Asp-Glu-Ala-Asp) box helicase 1	0.706	1.63127	0.011418
224654_at	Hs.5122.0	DDX21	DEAD (Asp-Glu-Ala-Asp) box helicase 21	0.724	1.65176	0.039523
235436_at	Hs.133082.0	DDX31	DEAD (Asp-Glu-Ala-Asp) box polypeptide 31	1.58	2.9897	0.036027
201584_s_at	g5031658	DDX39A	DEAD (Asp-Glu-Ala-Asp) box polypeptide 39A	1.022	2.03073	0.034803
217840_at	g7705259	DDX41	DEAD (Asp-Glu-Ala-Asp) box polypeptide 41	0.67	1.59107	0.049943
201788_at	g11321631	DDX42	DEAD (Asp-Glu-Ala-Asp) box helicase 42	0.717	1.64376	0.043562
31807_at	4863599	DDX49	DEAD (Asp-Glu-Ala-Asp) box polypeptide 49	0.654	1.57352	0.043054
1564164_at	Hs2.377062.1	DENND1B	DENN/MADD domain containing 1B	1.238	2.35871	0.023669
212527_at	Hs.12421.0	DESI1	desumoylating isopeptidase 1	1.228	2.34242	0.005534
212528_at	Hs.12421.0	DESI1	desumoylating isopeptidase 1	0.723	1.65061	0.0255
223518_at	g4926917	DFFA	DNA fragmentation factor, 45kDa, alpha polypeptide	1.208	2.31017	0.04808
203669_s_at	g7382489	DGAT1	diacylglycerol O-acyltransferase 1	1.147	2.21453	0.007274
226064_s_at	Hs.74637.1	DGAT2	diacylglycerol O-acyltransferase 2	1.417	2.6703	0.002494
224327_s_at	g13537296	DGAT2	diacylglycerol O-acyltransferase 2	1.28	2.42839	0.010073
1554623_x_at	Hs2.54506.2	DGKE	diacylglycerol kinase, epsilon 64kDa	1.02	2.02792	0.023252
1554621_at	Hs2.54506.2	DGKE	diacylglycerol kinase, epsilon 64kDa	0.98	1.97247	0.019832
216349_at	Hs.283831.0	DGKH	diacylglycerol kinase, eta	0.98	1.97247	0.013233
239342_at	Hs.165827.0	DGKZ	diacylglycerol kinase, zeta	1.418	2.67215	0.009145
224064_s_at	g13278671	DHDDS	dehydrodolichyl diphosphate synthase subunit	0.706	1.63127	0.009628
214079_at	Hs.152677.0	DHRS2	dehydrogenase/reductase (SDR family) member 2	1.973	3.92584	0.013081
227094_at	Hs.11732.0	DHTKD1	dehydrogenase E1 and transketolase domain containing 1	0.633	1.55079	0.036853
212648_at	Hs.95665.0	DHX29	DEAH (Asp-Glu-Ala-His) box polypeptide 29	0.709	1.63467	0.026274
227079_at	Hs.171872.1	DHX8	DEAH (Asp-Glu-Ala-His) box polypeptide 8	0.766	1.70055	0.032726
220997_s_at	g13569894	DIAPH3	diaphanous-related formin 3	2.506	5.68043	0.014559
232596_at	Hs.122164.0	DIAPH3	diaphanous-related formin 3	1.678	3.19984	0.000964
229097_at	Hs.283127.0	DIAPH3	diaphanous-related formin 3	0.842	1.79253	0.041838
214193_s_at	Hs.173381.1	DIEXF	digestive organ expansion factor homolog (zebrafish)	1.45	2.73208	0.033678
204700_x_at	g7657018	DIEXF	digestive organ expansion factor homolog (zebrafish)	1.349	2.54735	0.042416
204699_s_at	Hs.194754.0	DIEXF	digestive organ expansion factor homolog (zebrafish)	1.282	2.43176	0.015165
210801_at	g12803982	DIMT1	DIM1 dimethyladenosine transferase 1 homolog	1.197	2.29262	0.031926
222607_s_at	Hs.323346.0	DIS3	DIS3 homolog, exosome endoribonuclease and 3'-5' exoribonuclease	0.872	1.8302	0.011161
234660_s_at	Hs.323346.1	DIS3	DIS3 homolog, exosome endoribonuclease and 3'-5' exoribonuclease	0.695	1.61888	0.038872
238602_at	Hs.160159.0	DIS3L2	DIS3 like 3'-5' exoribonuclease 2	0.667	1.58777	0.008592
216212_s_at	Hs.4747.1	DKC1	dyskeratosis congenita 1, dyskerin	1.107	2.15397	0.00443
201479_at	g4503336	DKC1	dyskeratosis congenita 1, dyskerin	0.967	1.95477	0.012124
201478_s_at	g2737893	DKC1	dyskeratosis congenita 1, dyskerin	0.959	1.94396	0.005678
211150_s_at	g619443	DLAT	dihydrolipoamide S-acetyltransferase	0.674	1.59549	0.010699
210762_s_at	g2559001	DLC1	DLC1 Rho GTPase activating protein	1.507	2.84218	0.00238
224822_at	Hs.8700.1	DLC1	DLC1 Rho GTPase activating protein	1.187	2.27679	0.002563
230426_at	Hs.74635.1	DLD	dihydrolipoamide dehydrogenase	1.075	2.10672	0.019499
216870_x_at	Hs.43628.1	DLEU2	deleted in lymphocytic leukemia 2 (non-protein coding)	1.77	3.41054	0.010369
230229_at	Hs.118923.0	DLG1	discs, large homolog 1 (Drosophila)	0.937	1.91454	0.042178
219537_x_at	g8393263	DLL3	delta-like 3 (Drosophila)	0.767	1.70173	0.023032
242138_at	Hs.302685.0	DLX1	distal-less homeobox 1	0.85	1.8025	0.010757
205963_s_at	g4827025	DNAJA3	DnaJ (Hsp40) homolog, subfamily A, member 3	0.678	1.59992	0.010671
1554078_s_at	Hs2.6216.2	DNAJA3	DnaJ (Hsp40) homolog, subfamily A, member 3	0.665	1.58557	0.00981
1555360_a_at	Hs2.261134.2	DNAJC11	DnaJ (Hsp40) homolog, subfamily C, member 11	0.931	1.9066	0.014737
215792_s_at	Hs.261134.1	DNAJC11	DnaJ (Hsp40) homolog, subfamily C, member 11	0.865	1.82134	0.039437
223420_at	Hs.311944.0	DNAJC14	DnaJ (Hsp40) homolog, subfamily C, member 14	0.881	1.84165	0.031883
218435_at	g7019452	DNAJC15	DnaJ (Hsp40) homolog, subfamily C, member 15	1.043	2.06051	0.00257
1568884_at	Hs2.431755.1	DNAJC2	DnaJ (Hsp40) homolog, subfamily C, member 2	1.113	2.16295	0.011147
213097_s_at	Hs.82254.0	DNAJC2	DnaJ (Hsp40) homolog, subfamily C, member 2	0.807	1.74957	0.006606
202416_at	g4507712	DNAJC7	DnaJ (Hsp40) homolog, subfamily C, member 7	0.784	1.7219	0.010767
1556053_at	Hs2.401839.1	DNAJC7	DnaJ (Hsp40) homolog, subfamily C, member 7	0.765	1.69937	0.007687
228272_at	Hs.135133.0	DNLZ	DNL-type zinc finger	0.634	1.55186	0.01586
241708_at	Hs.309770.0	DOCK1	dedicator of cytokinesis 1	1.588	3.00632	0.007767
1569590_at	Hs2.383002.1	DOCK5	dedicator of cytokinesis 5	1.931	3.81319	0.035338
1570078_a_at	Hs2.376960.2	DOCK5	dedicator of cytokinesis 5	1.335	2.52275	0.004833
219921_s_at	g13376416	DOCK5	dedicator of cytokinesis 5	1.291	2.44698	0.016334
230207_s_at	Hs.131705.1	DOCK5	dedicator of cytokinesis 5	1.158	2.23148	0.02834
230263_s_at	Hs.131705.0	DOCK5	dedicator of cytokinesis 5	1.139	2.20228	0.031883
230206_at	Hs.131705.1	DOCK5	dedicator of cytokinesis 5	1.073	2.1038	0.028934
208141_s_at	g13775227	DOHH	deoxyhypusine hydroxylase/monooxygenase	1.006	2.00834	0.02103
231297_at	Hs.173739.1	DOT1L	DOT1-like histone H3K79 methyltransferase	0.922	1.89474	0.0102
209391_at	g12001993	DPM2	dolichyl-phosphate mannosyltransferase polypeptide 2, regulatory subunit	1.113	2.16295	0.002136
219373_at	g9506552	DPM3	dolichyl-phosphate mannosyltransferase polypeptide 3	0.703	1.62789	0.044556
238784_at	Hs.125472.0	DPY19L2	dpy-19-like 2 (C. elegans)	1.209	2.31177	0.033416
1554536_at	Hs2.1602.2	DPYD	dihydropyrimidine dehydrogenase	1.55	2.92817	0.001114
201430_s_at	Hs.74566.0	DPYSL3	dihydropyrimidinase-like 3	0.858	1.81252	0.010797
205493_s_at	g11321616	DPYSL4	dihydropyrimidinase-like 4	1.597	3.02514	0.002088
211624_s_at	g181431	DRD2	dopamine receptor D2	1.665	3.17114	0.000713
216938_x_at	Hs.73893.2	DRD2	dopamine receptor D2	1.113	2.16295	0.005108
206590_x_at	g4503384	DRD2	dopamine receptor D2	0.88	1.84038	0.00314
219000_s_at	g13129095	DSCC1	DNA replication and sister chromatid cohesion 1	0.67	1.59107	0.023991
200606_at	g4758199	DSP	desmoplakin	0.745	1.67597	0.00981
1552718_at	Hs2.352419.1	DTD1	D-tyrosyl-tRNA deacylase 1	0.778	1.71475	0.039415
218585_s_at	g7705575	DTL	denticleless E3 ubiquitin protein ligase homolog (Drosophila)	1.785	3.44618	0.022529
222680_s_at	Hs.126774.0	DTL	denticleless E3 ubiquitin protein ligase homolog (Drosophila)	1.66	3.16017	0.008709
203270_at	g6912339	DTYMK	deoxythymidylate kinase	0.633	1.55079	0.049053
230145_at	Hs.284297.1	DUS3L	dihydrouridine synthase 3-like	1.067	2.09507	0.035034
203367_at	g5902001	DUSP14	dual specificity phosphatase 14	0.878	1.83783	0.028429
211541_s_at	g1663725	DYRK1A	dual specificity tyrosine-(Y)-phosphorylation regulated kinase 1A	0.732	1.66094	0.019832
202969_at	Hs.173135.1	DYRK2	dual specificity tyrosine-(Y)-phosphorylation regulated kinase 2	0.81	1.75321	0.029832
1563796_s_at	Hs2.353155.4	EARS2	glutamyl-tRNA synthetase 2, mitochondrial	1.366	2.57755	0.011037
227374_at	Hs.204692.0	EARS2	glutamyl-tRNA synthetase 2, mitochondrial	0.981	1.97383	0.002244
225993_at	Hs.204692.1	EARS2	glutamyl-tRNA synthetase 2, mitochondrial	0.96	1.94531	0.004261
204274_at	Hs.9222.0	EBAG9	estrogen receptor binding site associated, antigen, 9	0.861	1.8163	0.038569
1559796_at	Hs2.222486.1	EBF3	early B-cell factor 3	1.918	3.77899	0.008159
201323_at	g5803110	EBNA1BP2	EBNA1 binding protein 2	1.356	2.55974	0.000959
223306_at	g13506815	EBPL	emopamil binding protein-like	0.929	1.90396	0.020238
218025_s_at	g5174624	ECI2	enoyl-CoA delta isomerase 2	1.109	2.15696	0.006788
225885_at	Hs.24370.0	EEA1	early endosome antigen 1	0.792	1.73147	0.012522
204840_s_at	Hs.2864.0	EEA1	early endosome antigen 1	0.74	1.67018	0.044786
209572_s_at	g3420789	EED	embryonic ectoderm development	0.789	1.72788	0.004738
213087_s_at	Hs.223241.3	EEF1D	eukaryotic translation elongation factor 1 delta (guanine nucleotide exchange protein)	1.002	2.00277	0.008113
213907_at	Hs.298581.1	EEF1E1	eukaryotic translation elongation factor 1 epsilon 1	0.993	1.99032	0.01028
204905_s_at	g4758861	EEF1E1	eukaryotic translation elongation factor 1 epsilon 1	0.783	1.72071	0.015757
222483_at	Hs.301342.0	EFHD2	EF-hand domain family member D2	0.971	1.9602	0.012233
202669_s_at	g902370	EFNB2	ephrin-B2	2.187	4.55358	0.002873
202668_at	Hs.30942.0	EFNB2	ephrin-B2	1.607	3.04618	0.007238
222398_s_at	g12803112	EFTUD2	elongation factor Tu GTP binding domain containing 2	0.88	1.84038	0.003556
45297_at	4890517_RC	EHD2	EH domain containing 2	0.783	1.72071	0.048311
221870_at	Hs.20733.0	EHD2	EH domain containing 2	0.73	1.65864	0.048082
216396_s_at	Hs.286027.3	EI24	etoposide induced 2.4	0.833	1.78139	0.012086
223682_s_at	g13477312	EIF1AD	eukaryotic translation initiation factor 1A domain containing	0.733	1.66209	0.03525
218488_at	g9966778	EIF2B3	eukaryotic translation initiation factor 2B, subunit 3 gamma, 58kDa	1.278	2.42503	0.001467
200597_at	Hs.198899.0	EIF3A	eukaryotic translation initiation factor 3, subunit A	0.776	1.71238	0.029641
203462_x_at	g4503526	EIF3B	eukaryotic translation initiation factor 3, subunit B	0.736	1.66555	0.045896
208688_x_at	g2558667	EIF3B	eukaryotic translation initiation factor 3, subunit B	0.724	1.65176	0.037729
212716_s_at	Hs.324925.2	EIF3K	eukaryotic translation initiation factor 3, subunit K	1.302	2.4657	0.00336
210501_x_at	Hs.324925.1	EIF3K	eukaryotic translation initiation factor 3, subunit K	1.289	2.44359	0.00285
221494_x_at	g5114050	EIF3K	eukaryotic translation initiation factor 3, subunit K	1.236	2.35545	0.00555
221539_at	g11527778	EIF4EBP1	eukaryotic translation initiation factor 4E binding protein 1	1.081	2.1155	0.041133
214313_s_at	Hs.158688.1	EIF5B	eukaryotic translation initiation factor 5B	0.9	1.86607	0.007014
201025_at	Hs.158688.0	EIF5B	eukaryotic translation initiation factor 5B	0.854	1.80751	0.022169
201026_at	Hs.158688.0	EIF5B	eukaryotic translation initiation factor 5B	0.77	1.70527	0.007172
214314_s_at	Hs.158688.1	EIF5B	eukaryotic translation initiation factor 5B	0.65	1.56917	0.034794
203490_at	g4503554	ELF4	E74-like factor 4 (ets domain transcription factor)	0.876	1.83528	0.008816
31845_at	4863928	ELF4	E74-like factor 4 (ets domain transcription factor)	0.871	1.82893	0.009699
1559072_a_at	Hs2.250726.1	ELFN2	extracellular leucine-rich repeat and fibronectin type III domain containing 2	1.092	2.13169	0.046552
206919_at	g11496881	ELK4	ELK4, ETS-domain protein (SRF accessory protein 1)	1.398	2.63536	0.013896
225156_at	Hs.326422.0	ELOF1	ELF1 homolog, elongation factor 1	0.831	1.77892	0.011612
57163_at	4893761_RC	ELOVL1	ELOVL fatty acid elongase 1	1.376	2.59548	0.017304
218028_at	g7705798	ELOVL1	ELOVL fatty acid elongase 1	1.355	2.55797	0.03232
213712_at	Hs.30504.0	ELOVL2	ELOVL fatty acid elongase 2	1.618	3.06949	0.00372
220029_at	g8923311	ELOVL2	ELOVL fatty acid elongase 2	1.418	2.67215	0.00832
221094_s_at	g8922417	ELP3	elongator acetyltransferase complex subunit 3	0.743	1.67365	0.009129
234464_s_at	Hs.283558.3	EME1	essential meiotic structure-specific endonuclease 1	0.985	1.97931	0.001903
209233_at	g2276395	EMG1	EMG1 N1-specific pseudouridine methyltransferase	0.916	1.88688	0.020298
242288_s_at	Hs.270143.0	EMILIN2	elastin microfibril interfacer 2	1.23	2.34567	0.006302
224374_s_at	g13661555	EMILIN2	elastin microfibril interfacer 2	0.999	1.99861	0.019163
229011_at	Hs.43148.0	EMP1	epithelial membrane protein 1	0.812	1.75564	0.028593
207060_at	g7710120	EN2	engrailed homeobox 2	1.999	3.99723	0.001197
1553672_at	Hs2.32399.1	ENAH	enabled homolog (Drosophila)	1.371	2.5865	0.00718
228553_at	Hs.32399.0	ENAH	enabled homolog (Drosophila)	0.937	1.91454	0.041838
222433_at	Hs.14838.0	ENAH	enabled homolog (Drosophila)	0.791	1.73027	0.038875
204824_at	g4758269	ENDOG	endonuclease G	0.71	1.6358	0.037535
219501_at	g8922226	ENOX1	ecto-NOX disulfide-thiol exchanger 1	0.642	1.56049	0.019666
227638_at	Hs.288604.0	EPG5	ectopic P-granules autophagy protein 5 homolog (C. elegans)	0.776	1.71238	0.013784
232031_s_at	Hs.288604.1	EPG5	ectopic P-granules autophagy protein 5 homolog (C. elegans)	0.638	1.55617	0.02814
204718_at	g4758291	EPHB6	EPH receptor B6	1.399	2.63719	0.022602
222113_s_at	Hs.147176.1	EPS15L1	epidermal growth factor receptor pathway substrate 15-like 1	1.584	2.998	0.008637
231926_at	Hs.318510.0	EPS15L1	epidermal growth factor receptor pathway substrate 15-like 1	1.095	2.13613	0.024699
227609_at	Hs.180669.2	EPSTI1	epithelial stromal interaction 1 (breast)	1.601	3.03354	0.00959
235276_at	Hs.122587.0	EPSTI1	epithelial stromal interaction 1 (breast)	1.023	2.03214	0.004953
1570371_a_at	Hs2.324531.1	EPT1	ethanolaminephosphotransferase 1	1.217	2.32463	0.043413
241926_s_at	Hs.279764.0	ERG	v-ets avian erythroblastosis virus E26 oncogene homolog	0.776	1.71238	0.045959
224576_at	Hs.180428.1	ERGIC1	endoplasmic reticulum-golgi intermediate compartment 1	1.452	2.73587	0.009136
224577_at	Hs.180428.1	ERGIC1	endoplasmic reticulum-golgi intermediate compartment 1	1.17	2.25012	0.006929
223847_s_at	g12006036	ERGIC1	endoplasmic reticulum-golgi intermediate compartment 1	0.926	1.9	0.00217
226422_at	Hs.26813.1	ERGIC2	ERGIC and golgi 2	0.806	1.74836	0.044647
226416_at	Hs.20000.0	ERI1	exoribonuclease 1	0.722	1.64947	0.014626
227016_at	Hs.193090.0	ERICH1	glutamate rich 1	0.937	1.91454	0.010015
242003_at	Hs.196496.0	ERICH1	glutamate rich 1	0.906	1.87384	0.036347
227017_at	Hs.193090.0	ERICH1	glutamate rich 1	0.877	1.83655	0.021202
1563315_s_at	Hs2.406115.2	ERICH1	glutamate rich 1	0.659	1.57899	0.016941
235178_x_at	Hs.265592.0	ESCO2	establishment of sister chromatid cohesion N-acetyltransferase 2	1.606	3.04407	0.011356
241252_at	Hs.99480.1	ESCO2	establishment of sister chromatid cohesion N-acetyltransferase 2	1.557	2.94241	0.015031
235588_at	Hs.99480.0	ESCO2	establishment of sister chromatid cohesion N-acetyltransferase 2	1.251	2.38006	0.022033
1564473_at	Hs2.407503.1	ESCO2	establishment of sister chromatid cohesion N-acetyltransferase 2	0.752	1.68413	0.038771
222765_x_at	Hs.88820.0	ESF1	ESF1 nucleolar pre-rRNA processing protein homolog	0.891	1.85446	0.025868
218859_s_at	g7705402	ESF1	ESF1 nucleolar pre-rRNA processing protein homolog	0.662	1.58227	0.023588
38158_at	4852842_RC	ESPL1	extra spindle pole bodies like 1, separase	0.791	1.73027	0.031627
204817_at	g6912453	ESPL1	extra spindle pole bodies like 1, separase	0.736	1.66555	0.045896
1552445_a_at	Hs2.223782.1	ESX1	ESX homeobox 1	3.495	11.2746	0.000608
201573_s_at	g338686	ETF1	eukaryotic translation termination factor 1	0.838	1.78757	0.003719
204034_at	g7657686	ETHE1	ethylmalonic encephalopathy 1	1.14	2.20381	0.006618
227188_at	Hs.30156.0	EVA1C	eva-1 homolog C (C. elegans)	1.011	2.01531	0.010077
210011_s_at	Hs.129953.0	EWSR1	EWS RNA binding protein 1	0.815	1.7593	0.021314
204603_at	g4504368	EXO1	exonuclease 1	1.884	3.69097	0.009391
227577_at	Hs.120828.0	EXOC8	exocyst complex component 8	0.989	1.98481	0.010345
1559044_at	Hs2.376645.1	EXOSC1	exosome component 1	0.722	1.64947	0.041519
214507_s_at	Hs.211973.1	EXOSC2	exosome component 2	1.028	2.0392	0.007894
203358_s_at	g4758323	EZH2	enhancer of zeste 2 polycomb repressive complex 2 subunit	0.731	1.65979	0.008463
203980_at	g4557578	FABP4	fatty acid binding protein 4, adipocyte	1.027	2.03778	0.017626
202345_s_at	g4557580	FABP5	fatty acid binding protein 5 (psoriasis-associated)	0.883	1.84421	0.004051
236481_at	Hs.18001.0	FAH	fumarylacetoacetate hydrolase (fumarylacetoacetase)	1.328	2.51054	0.008397
202862_at	g4557586	FAH	fumarylacetoacetate hydrolase (fumarylacetoacetase)	0.721	1.64832	0.045806
1555944_at	Hs2.376640.1	FAM120A	family with sequence similarity 120A	0.72	1.64718	0.049362
210516_at	g8118022	FAM120A	family with sequence similarity 120A	0.687	1.60993	0.04137
206299_at	g7662670	FAM155B	family with sequence similarity 155, member B	1.724	3.30351	0.013222
233971_at	Hs.251653.3	FAM166A	family with sequence similarity 166, member A	0.885	1.84676	0.006707
226614_s_at	Hs.35453.0	FAM167A	family with sequence similarity 167, member A	0.838	1.78757	0.015654
233641_s_at	Hs.35453.1	FAM167A	family with sequence similarity 167, member A	0.76	1.69349	0.040075
221880_s_at	Hs.27373.0	FAM174B	family with sequence similarity 174, member B	1.247	2.37347	0.006674
51158_at	4870849	FAM174B	family with sequence similarity 174, member B	1.103	2.14801	0.00418
242348_at	Hs.187873.0	FAM19A4	family with sequence similarity 19 (chemokine (C-C motif)-like), member A4	1.162	2.23767	0.029852
229655_at	Hs.22241.0	FAM19A5	family with sequence similarity 19 (chemokine (C-C motif)-like), member A5	1.084	2.11991	0.005141
202915_s_at	Hs.5737.0	FAM20B	family with sequence similarity 20, member B	1.051	2.07197	0.029865
202916_s_at	g7662149	FAM20B	family with sequence similarity 20, member B	0.939	1.9172	0.006438
229438_at	Hs.179769.0	FAM20C	family with sequence similarity 20, member C	1.787	3.45097	0.017266
230739_at	Hs.41654.0	FAM210A	family with sequence similarity 210, member A	0.853	1.80625	0.021828
242149_at	Hs.289083.0	FAM210A	family with sequence similarity 210, member A	0.827	1.77399	0.039783
235022_at	Hs.13034.0	FAM210A	family with sequence similarity 210, member A	0.799	1.73989	0.02666
38043_at	4903815	FAM3A	family with sequence similarity 3, member A	0.729	1.65749	0.010953
1569256_a_at	Hs2.321718.1	FAM43B	family with sequence similarity 43, member B	1.038	2.05338	0.005567
212333_at	Hs.23060.0	FAM98A	family with sequence similarity 98, member A	1.189	2.27995	0.003687
241832_at	Hs.211648.0	FAM98A	family with sequence similarity 98, member A	1.063	2.08927	0.035867
1553244_at	Hs2.277254.1	FANCB	Fanconi anemia complementation group B	1.804	3.49187	0.00755
1557217_a_at	Hs2.277254.2	FANCB	Fanconi anemia complementation group B	1.09	2.12874	0.021776
1557218_s_at	Hs2.277254.2	FANCB	Fanconi anemia complementation group B	0.955	1.93858	0.014497
213008_at	Hs.80961.1	FANCI	Fanconi anemia complementation group I	0.827	1.77399	0.010503
209955_s_at	g1924981	FAP	fibroblast activation protein alpha	2.443	5.43771	0.003186
227996_at	Hs.92414.0	FARP1	FERM, ARH/RhoGEF and pleckstrin domain protein 1	1.227	2.3408	0.016101
202159_at	g4758339	FARSA	phenylalanyl-tRNA synthetase alpha subunit	1.063	2.08927	0.008248
216602_s_at	Hs.23111.1	FARSA	phenylalanyl-tRNA synthetase alpha subunit	0.883	1.84421	0.023026
223035_s_at	g6841565	FARSB	phenylalanyl-tRNA synthetase beta subunit	0.78	1.71713	0.013165
1560490_at	Hs2.350564.1	FAT3	FAT atypical cadherin 3	1.411	2.65921	0.010856
1558964_at	Hs2.363021.1	FAT3	FAT atypical cadherin 3	0.963	1.94936	0.016635
1555288_s_at	Hs2.380465.2	FBF1	Fas (TNFRSF6) binding factor 1	0.676	1.5977	0.035255
203886_s_at	g4503664	FBLN2	fibulin 2	0.987	1.98206	0.033129
222352_at	Hs.227170.0	FBXO31	F-box protein 31	1.132	2.19162	0.011014
241763_s_at	Hs.97079.0	FBXO32	F-box protein 32	1.445	2.72263	0.025072
234863_x_at	Hs.272027.1	FBXO5	F-box protein 5	0.798	1.73869	0.031583
206760_s_at	g4503678	FCER2	Fc fragment of IgE, low affinity II, receptor for (CD23)	0.725	1.6529	0.038449
238452_at	Hs.164495.0	FCRLB	Fc receptor-like B	1.323	2.50186	0.012806
243059_at	Hs.148676.0	FENDRR	FOXF1 adjacent non-coding developmental regulatory RNA	2.029	4.08122	0.009428
242332_at	Hs.49776.0	FENDRR	FOXF1 adjacent non-coding developmental regulatory RNA	1.916	3.77375	0.007256
229545_at	Hs.288516.0	FERMT1	fermitin family member 1	0.967	1.95477	0.014197
208240_s_at	g7019394	FGF1	fibroblast growth factor 1 (acidic)	2.373	5.18017	0.008636
233185_at	Hs.24974.0	FGF14	fibroblast growth factor 14	0.648	1.56699	0.041701
239178_at	Hs.197018.0	FGF9	fibroblast growth factor 9	1.645	3.12748	0.003222
206404_at	g4503706	FGF9	fibroblast growth factor 9	1.085	2.12138	0.003486
205014_at	g4826753	FGFBP1	fibroblast growth factor binding protein 1	1.121	2.17498	0.022104
203639_s_at	g186740	FGFR2	fibroblast growth factor receptor 2	0.812	1.75564	0.038141
208228_s_at	g186781	FGFR2	fibroblast growth factor receptor 2	0.806	1.74836	0.049973
211401_s_at	g6691454	FGFR2	fibroblast growth factor receptor 2	0.782	1.71951	0.042337
223321_s_at	g13183617	FGFRL1	fibroblast growth factor receptor-like 1	0.872	1.8302	0.019423
223648_s_at	g13447748	FGFRL1	fibroblast growth factor receptor-like 1	0.791	1.73027	0.035083
203032_s_at	Hs.75653.0	FH	fumarate hydratase	1.34	2.53151	0.000774
203033_x_at	g4503716	FH	fumarate hydratase	0.963	1.94936	0.002304
214170_x_at	Hs.75653.1	FH	fumarate hydratase	0.904	1.87125	0.002088
218034_at	g7705631	FIS1	fission, mitochondrial 1	0.975	1.96564	0.014131
228308_at	Hs.24048.1	FKBP11	FK506 binding protein 11	1	2	0.019319
200895_s_at	g4503728	FKBP4	FK506 binding protein 4	0.907	1.87514	0.032036
212541_at	Hs.118666.1	FLAD1	flavin adenine dinucleotide synthetase 1	0.909	1.87774	0.02132
205661_s_at	g13376805	FLAD1	flavin adenine dinucleotide synthetase 1	0.672	1.59328	0.006471
200859_x_at	g4503744	FLNA	filamin A, alpha	0.783	1.72071	0.016765
214752_x_at	Hs.195464.3	FLNA	filamin A, alpha	0.66	1.58008	0.02399
207876_s_at	g4557596	FLNC	filamin C, gamma	1.352	2.55266	0.007999
223618_at	g9963854	FMN2	formin 2	2.195	4.5789	0.008609
1555471_a_at	Hs2.24889.2	FMN2	formin 2	1.918	3.77899	0.015165
1559244_at	Hs2.122656.1	FMN2	formin 2	1.068	2.09652	0.010856
214702_at	Hs.321592.0	FN1	fibronectin 1	1.767	3.40345	0.048073
210495_x_at	g11493493	FN1	fibronectin 1	1.626	3.08656	0.003189
216442_x_at	Hs.287820.2	FN1	fibronectin 1	1.595	3.02095	0.002488
212464_s_at	Hs.287820.1	FN1	fibronectin 1	1.422	2.67957	0.005263
211719_x_at	g13543399	FN1	fibronectin 1	1.376	2.59548	0.004969
214701_s_at	Hs.321592.0	FN1	fibronectin 1	1.349	2.54735	0.007717
229865_at	Hs.58217.0	FNDC3B	fibronectin type III domain containing 3B	0.752	1.68413	0.035143
204420_at	Hs.283565.0	FOSL1	FOS-like antigen 1	1.125	2.18102	0.00132
218880_at	Hs.325364.0	FOSL2	FOS-like antigen 2	1.34	2.53151	0.018466
228188_at	Hs.5890.0	FOSL2	FOS-like antigen 2	1.127	2.18404	0.010374
225262_at	Hs.5890.1	FOSL2	FOS-like antigen 2	1.123	2.17799	0.019832
218881_s_at	g13375679	FOSL2	FOS-like antigen 2	1.016	2.0223	0.022272
205935_at	g4503732	FOXF1	forkhead box F1	1.668	3.17774	0.002136
206377_at	g4557594	FOXF2	forkhead box F2	0.945	1.92519	0.02562
202580_x_at	g11386144	FOXM1	forkhead box M1	0.818	1.76296	0.033853
223128_at	g12053340	FOXRED1	FAD-dependent oxidoreductase domain containing 1	0.954	1.93724	0.005299
202945_at	g4826727	FPGS	folylpolyglutamate synthase	0.729	1.65749	0.045001
221308_at	g5730056	FRS2	fibroblast growth factor receptor substrate 2	0.788	1.72668	0.00784
204948_s_at	g7242221	FST	follistatin	2.395	5.25977	0.049331
226847_at	Hs.301570.0	FST	follistatin	2.149	4.4352	0.039296
207345_at	g7242223	FST	follistatin	2.073	4.20761	0.039866
223976_at	g13436133	FUT10	fucosyltransferase 10 (alpha (1,3) fucosyltransferase)	0.826	1.77276	0.03041
218084_x_at	g11612664	FXYD5	FXYD domain containing ion transport regulator 5	1.435	2.70382	0.004503
224252_s_at	g9957274	FXYD5	FXYD domain containing ion transport regulator 5	1.418	2.67215	0.006341
224325_at	g13623798	FZD8	frizzled class receptor 8	1.609	3.0504	0.037603
201514_s_at	g5031702	G3BP1	GTPase activating protein (SH3 domain) binding protein 1	0.777	1.71356	0.023591
221759_at	Hs.294005.0	G6PC3	glucose 6 phosphatase, catalytic, 3	1.417	2.6703	0.02399
44654_at	4871279	G6PC3	glucose 6 phosphatase, catalytic, 3	1.376	2.59548	0.015882
202275_at	g4503844	G6PD	glucose-6-phosphate dehydrogenase	0.804	1.74594	0.019666
209990_s_at	g3719225	GABBR2	gamma-aminobutyric acid (GABA) B receptor, 2	1.669	3.17994	0.011349
209991_x_at	g4091932	GABBR2	gamma-aminobutyric acid (GABA) B receptor, 2	1.198	2.29421	0.013074
217077_s_at	Hs.198612.1	GABBR2	gamma-aminobutyric acid (GABA) B receptor, 2	1.081	2.1155	0.02402
211679_x_at	g4836217	GABBR2	gamma-aminobutyric acid (GABA) B receptor, 2	1.047	2.06623	0.02341
1554308_s_at	Hs2.91343.2	GABRA2	gamma-aminobutyric acid (GABA) A receptor, alpha 2	1.131	2.1901	0.013728
230255_at	Hs.118329.0	GABRD	gamma-aminobutyric acid (GABA) A receptor, delta	0.965	1.95206	0.012678
204537_s_at	g12707559	GABRE	gamma-aminobutyric acid (GABA) A receptor, epsilon	1.856	3.62003	0.014979
212889_x_at	Hs.83135.1	GADD45GIP1	growth arrest and DNA-damage-inducible, gamma interacting protein 1	0.673	1.59438	0.044543
225495_x_at	Hs.83135.0	GADD45GIP1	growth arrest and DNA-damage-inducible, gamma interacting protein 1	0.671	1.59218	0.032633
1552473_at	Hs2.81131.2	GAMT	guanidinoacetate N-methyltransferase	0.899	1.86477	0.01922
212804_s_at	Hs.172069.0	GAPVD1	GTPase activating protein and VPS9 domains 1	0.728	1.65634	0.011131
230097_at	Hs.144097.0	GART	phosphoribosylglycinamide formyltransferase, phosphoribosylglycinamide synthetase, phosphoribosylaminoimidazole synthetase	1.288	2.44189	0.005085
244822_at	Hs.164168.0	GART	phosphoribosylglycinamide formyltransferase, phosphoribosylglycinamide synthetase, phosphoribosylaminoimidazole synthetase	1.126	2.18253	0.041064
217445_s_at	Hs.82285.2	GART	phosphoribosylglycinamide formyltransferase, phosphoribosylglycinamide synthetase, phosphoribosylaminoimidazole synthetase	0.686	1.60882	0.022863
205517_at	Hs.243987.0	GATA4	GATA binding protein 4	0.842	1.79253	0.020669
1553131_a_at	Hs2.243987.1	GATA4	GATA binding protein 4	0.737	1.66671	0.028105
234986_at	Hs.315562.0	GCLM	glutamate-cysteine ligase, modifier subunit	1.316	2.48975	0.012799
236140_at	Hs.193452.0	GCLM	glutamate-cysteine ligase, modifier subunit	1.145	2.21146	0.015717
203925_at	g4504010	GCLM	glutamate-cysteine ligase, modifier subunit	1.013	2.0181	0.013867
221279_at	g9506716	GDAP1	ganglioside induced differentiation associated protein 1	0.643	1.56157	0.033756
206159_at	g11641417	GDF10	growth differentiation factor 10	0.66	1.58008	0.021535
216860_s_at	Hs.34941.2	GDF11	growth differentiation factor 11	0.811	1.75443	0.007817
225712_at	Hs.25882.0	GEMIN5	gem nuclear organelle associated protein 5	1.263	2.39994	0.001189
219539_at	g13376126	GEMIN6	gem nuclear organelle associated protein 6	0.783	1.72071	0.006923
222821_s_at	Hs.102991.0	GEMIN7	gem nuclear organelle associated protein 7	0.752	1.68413	0.025593
1555751_a_at	Hs2.102991.2	GEMIN7	gem nuclear organelle associated protein 7	0.636	1.55401	0.014156
204659_s_at	g4325313	GFER	growth factor, augmenter of liver regeneration	0.783	1.72071	0.045133
225158_at	Hs.41066.0	GFM1	G elongation factor, mitochondrial 1	1.102	2.14652	0.018262
225161_at	Hs.41066.0	GFM1	G elongation factor, mitochondrial 1	0.919	1.8908	0.038627
225153_at	Hs.41066.0	GFM1	G elongation factor, mitochondrial 1	0.813	1.75686	0.037603
232296_s_at	Hs.274543.0	GFM1	G elongation factor, mitochondrial 1	0.784	1.7219	0.047784
1554486_a_at	Hs2.334897.2	GFOD1	glucose-fructose oxidoreductase domain containing 1	1.829	3.55291	0.010908
219821_s_at	g9506674	GFOD1	glucose-fructose oxidoreductase domain containing 1	0.913	1.88296	0.012318
227550_at	Hs.94694.0	GFRA1	GDNF family receptor alpha 1	2.346	5.08413	0.000746
205696_s_at	g4885268	GFRA1	GDNF family receptor alpha 1	1.697	3.24226	0.000964
230163_at	Hs.105445.2	GFRA1	GDNF family receptor alpha 1	1.412	2.66106	0.034625
214006_s_at	Hs.77719.1	GGCX	gamma-glutamyl carboxylase	1.049	2.0691	0.011609
214005_at	Hs.77719.1	GGCX	gamma-glutamyl carboxylase	1.019	2.02651	0.005437
1558305_at	Hs2.355837.1	GIGYF2	GRB10 interacting GYF protein 2	1.347	2.54383	0.007243
1560133_at	Hs2.406885.1	GIGYF2	GRB10 interacting GYF protein 2	1.042	2.05908	0.036794
219243_at	g8922872	GIMAP4	GTPase, IMAP family member 4	1.097	2.13909	0.022002
235029_at	Hs.293545.0	GINS4	GINS complex subunit 4 (Sld5 homolog)	2.029	4.08122	0.001047
211767_at	g13543688	GINS4	GINS complex subunit 4 (Sld5 homolog)	1.719	3.29208	0.013876
223278_at	g4481752	GJB2	gap junction protein beta 2	1.567	2.96288	0.001767
243502_at	Hs.245330.0	GJC1	gap junction protein gamma 1	1.016	2.0223	0.031883
225371_at	Hs.169363.1	GLE1	GLE1 RNA export mediator	0.674	1.59549	0.025113
226142_at	Hs.154762.2	GLIPR1	GLI pathogenesis-related 1	2.411	5.31843	0.031951
204222_s_at	g5803150	GLIPR1	GLI pathogenesis-related 1	2.327	5.01761	0.044095
226136_at	Hs.154762.2	GLIPR1	GLI pathogenesis-related 1	2.122	4.35297	0.039595
204221_x_at	g1100927	GLIPR1	GLI pathogenesis-related 1	1.411	2.65921	0.01829
214085_x_at	Hs.154762.1	GLIPR1	GLI pathogenesis-related 1	1.368	2.58112	0.023547
219933_at	g7705627	GLRX2	glutaredoxin 2	0.804	1.74594	0.009499
203159_at	g7662327	GLS	glutaminase	1.269	2.40994	0.001323
203158_s_at	g6002672	GLS	glutaminase	1.133	2.19314	0.018663
203157_s_at	g4240164	GLS	glutaminase	0.909	1.87774	0.006075
200648_s_at	g4504026	GLUL	glutamate-ammonia ligase	0.954	1.93724	0.034108
35820_at	4898374	GM2A	GM2 ganglioside activator	0.889	1.85189	0.026338
212737_at	Hs.278242.3	GM2A	GM2 ganglioside activator	0.772	1.70764	0.026653
215891_s_at	Hs.289082.1	GM2A	GM2 ganglioside activator	0.743	1.67365	0.038107
218350_s_at	g7705681	GMNN	geminin, DNA replication inhibitor	1.178	2.26263	0.004236
219920_s_at	g11761620	GMPPB	GDP-mannose pyrophosphorylase B	0.943	1.92252	0.008248
214071_at	Hs.154145.1	GNAL	guanine nucleotide binding protein (G protein), alpha activating activity polypeptide, olfactory type	1.209	2.31177	0.002476
206356_s_at	g4504042	GNAL	guanine nucleotide binding protein (G protein), alpha activating activity polypeptide, olfactory type	0.917	1.88818	0.0407
213924_at	Hs.154145.3	GNAL	guanine nucleotide binding protein (G protein), alpha activating activity polypeptide, olfactory type	0.789	1.72788	0.020787
201948_at	g7019418	GNL2	guanine nucleotide binding protein-like 2 (nucleolar)	0.962	1.94801	0.002262
205010_at	g9506610	GNL3L	guanine nucleotide binding protein-like 3 (nucleolar)-like	0.851	1.80375	0.012877
1554167_a_at	Hs2.7953.2	GOLGA7	golgin A7	0.706	1.63127	0.045248
218873_at	g8923193	GON4L	gon-4-like (C. elegans)	1.332	2.51751	0.004809
1555913_at	Hs2.169813.1	GON4L	gon-4-like (C. elegans)	0.885	1.84676	0.010503
213206_at	Hs.100651.2	GOSR2	golgi SNAP receptor complex member 2	1.521	2.8699	0.038432
208813_at	g12653452	GOT1	glutamic-oxaloacetic transaminase 1, soluble	0.74	1.67018	0.029357
211060_x_at	g13623546	GPAA1	glycosylphosphatidylinositol anchor attachment 1	1.087	2.12432	0.01732
215690_x_at	Hs.4742.1	GPAA1	glycosylphosphatidylinositol anchor attachment 1	0.956	1.93992	0.028388
201618_x_at	g6031166	GPAA1	glycosylphosphatidylinositol anchor attachment 1	0.87	1.82766	0.019395
224776_at	Hs.25664.1	GPAT4	glycerol-3-phosphate acyltransferase 4	0.954	1.93724	0.026103
224634_at	Hs.6880.2	GPATCH4	G-patch domain containing 4	1.552	2.93223	0.005596
224632_at	Hs.6880.2	GPATCH4	G-patch domain containing 4	1.314	2.4863	0.031627
221733_s_at	Hs.6880.2	GPATCH4	G-patch domain containing 4	1.231	2.3473	0.033145
204984_at	g4504082	GPC4	glypican 4	0.91	1.87905	0.012408
220265_at	g13470087	GPR107	G protein-coupled receptor 107	2.039	4.10961	0.004852
220264_s_at	g13470087	GPR107	G protein-coupled receptor 107	1.826	3.54553	0.00601
232195_at	Hs.21896.0	GPR158	G protein-coupled receptor 158	1.999	3.99723	0.000229
208311_at	g4758467	GPR50	G protein-coupled receptor 50	1.477	2.78369	0.035207
217782_s_at	g13435380	GPS1	G protein pathway suppressor 1	0.661	1.58118	0.017906
201348_at	g6006000	GPX3	glutathione peroxidase 3	1.459	2.74918	0.009307
214091_s_at	Hs.172153.1	GPX3	glutathione peroxidase 3	1.104	2.1495	0.01322
218468_s_at	g10863087	GREM1	gremlin 1, DAN family BMP antagonist	2.601	6.06707	0.011295
218469_at	g7019348	GREM1	gremlin 1, DAN family BMP antagonist	2.566	5.92165	0.013796
1569290_s_at	Hs2.382602.1	GRIA3	glutamate receptor, ionotropic, AMPA 3	3.734	13.306	0.000406
212090_at	Hs.101067.2	GRINA	glutamate receptor, ionotropic, N-methyl D-aspartate-associated protein 1 (glutamate binding)	0.86	1.81504	0.008609
216255_s_at	Hs.86204.1	GRM8	glutamate receptor, metabotropic 8	0.857	1.81127	0.019832
206326_at	g4504158	GRP	gastrin-releasing peptide	1.752	3.36825	0.000822
212432_at	Hs.151903.0	GRPEL1	GrpE-like 1, mitochondrial (E. coli)	0.677	1.59881	0.019629
221549_at	g13274610	GRWD1	glutamate-rich WD repeat containing 1	0.873	1.83147	0.031828
223759_s_at	g12718815	GSG2	germ cell associated 2 (haspin)	0.943	1.92252	0.032253
205770_at	g10835188	GSR	glutathione reductase	1.16	2.23457	0.014559
225609_at	Hs.193974.0	GSR	glutathione reductase	1.036	2.05053	0.008636
209595_at	g12804688	GTF2F2	general transcription factor IIF subunit 2	0.807	1.74957	0.029952
242656_at	Hs.158840.0	GTF2H1	general transcription factor IIH subunit 1	0.952	1.93455	0.028365
210620_s_at	g12652912	GTF3C2	general transcription factor IIIC subunit 2	0.798	1.73869	0.013643
233173_x_at	Hs.286088.1	GTF3C5	general transcription factor IIIC subunit 5	0.659	1.57899	0.027892
218238_at	g6912531	GTPBP4	GTP binding protein 4	1.296	2.45547	0.002438
218239_s_at	g6912531	GTPBP4	GTP binding protein 4	1.178	2.26263	0.005363
223837_at	g12654538	GULP1	GULP, engulfment adaptor PTB domain containing 1	1.478	2.78562	0.032502
215915_at	Hs.107056.2	GULP1	GULP, engulfment adaptor PTB domain containing 1	0.784	1.7219	0.039333
209818_s_at	g7417371	HABP4	hyaluronan binding protein 4	0.942	1.92119	0.04914
219654_at	g7657481	HACD1	3-hydroxyacyl-CoA dehydratase 1	1.248	2.37512	0.010345
206432_at	g4885390	HAS2	hyaluronan synthase 2	4.516	22.8798	0.001462
230372_at	Hs.133022.0	HAS2	hyaluronan synthase 2	4.512	22.8164	0.006411
213334_x_at	Hs.6487.2	HAUS7	HAUS augmin like complex subunit 7	0.804	1.74594	0.008636
226308_at	Hs.69280.0	HAUS8	HAUS augmin like complex subunit 8	0.897	1.86219	0.007396
203746_s_at	g4885400	HCCS	holocytochrome c synthase	1.034	2.04769	0.001649
242141_at	Hs.232662.0	HDAC2	histone deacetylase 2	0.72	1.64718	0.022443
223908_at	g13182768	HDAC8	histone deacetylase 8	1.298	2.45888	0.002392
221767_x_at	Hs.283473.1	HDLBP	high density lipoprotein binding protein	0.757	1.68997	0.017442
200643_at	g4885408	HDLBP	high density lipoprotein binding protein	0.667	1.58777	0.017234
232414_at	Hs.257300.0	HEATR1	HEAT repeat containing 1	1.84	3.5801	0.021325
1556348_at	Hs2.374141.1	HEATR1	HEAT repeat containing 1	0.936	1.91322	0.019687
1554478_a_at	Hs2.50579.2	HEATR3	HEAT repeat containing 3	0.847	1.79876	0.016458
1553402_a_at	Hs2.20019.10	HFE	hemochromatosis	0.853	1.80625	0.024002
219071_x_at	g13124772	HGH1	HGH1 homolog	1.702	3.25352	0.000505
221629_x_at	g7106765	HGH1	HGH1 homolog	1.242	2.36526	0.001541
220283_at	g13376071	HHIPL2	HHIP-like 2	1.645	3.12748	0.038428
224065_at	g11493927	HIPK2	homeodomain interacting protein kinase 2	2.227	4.68159	0.001591
240294_at	Hs.155877.0	HIPK2	homeodomain interacting protein kinase 2	1.844	3.59004	0.002353
204504_s_at	g5803030	HIRIP3	HIRA interacting protein 3	0.877	1.83655	0.008982
215779_s_at	Hs.247817.2	HIST1H2BG	histone cluster 1, H2bg	1.412	2.66106	0.029158
214516_at	Hs.143080.0	HIST1H4B	histone cluster 1, H4b	0.674	1.59549	0.049042
232581_x_at	Hs.149208.0	HIVEP3	human immunodeficiency virus type I enhancer binding protein 3	0.739	1.66902	0.006429
220042_x_at	g13375633	HIVEP3	human immunodeficiency virus type I enhancer binding protein 3	0.643	1.56157	0.010061
204755_x_at	g184223	HLF	hepatic leukemia factor	1.212	2.31659	0.006314
1558561_at	Hs2.399742.1	HM13	histocompatibility (minor) 13	0.949	1.93053	0.028541
1558683_a_at	Hs2.196151.1	HMGA2	high mobility group AT-hook 2	1.795	3.47015	0.003233
1561633_at	Hs2.434264.1	HMGA2	high mobility group AT-hook 2	1.127	2.18404	0.004362
1567224_at	Hs2.385267.1	HMGA2	high mobility group AT-hook 2	0.846	1.79751	0.030182
1558682_at	Hs2.196151.1	HMGA2	high mobility group AT-hook 2	0.806	1.74836	0.019952
218120_s_at	g416226	HMOX2	heme oxygenase 2	0.979	1.9711	0.009126
218121_at	g8051607	HMOX2	heme oxygenase 2	0.951	1.93321	0.002383
217755_at	g7705876	HN1	hematological and neurological expressed 1	0.996	1.99446	0.006971
201277_s_at	g4758541	HNRNPAB	heterogeneous nuclear ribonucleoprotein A/B	0.773	1.70882	0.006059
227110_at	Hs.182447.2	HNRNPC	heterogeneous nuclear ribonucleoprotein C (C1/C2)	0.764	1.69819	0.009573
201376_s_at	Hs.808.0	HNRNPF	heterogeneous nuclear ribonucleoprotein F	0.718	1.6449	0.04523
221639_x_at	Hs.103804.1	HNRNPU	heterogeneous nuclear ribonucleoprotein U (scaffold attachment factor A)	1.182	2.26891	0.010632
216855_s_at	Hs.103804.2	HNRNPU	heterogeneous nuclear ribonucleoprotein U (scaffold attachment factor A)	0.931	1.9066	0.007149
225786_at	Hs.279934.1	HNRNPU	heterogeneous nuclear ribonucleoprotein U (scaffold attachment factor A)	0.633	1.55079	0.032635
204647_at	g4758549	HOMER3	homer scaffolding protein 3	0.783	1.72071	0.031057
211597_s_at	g13560280	HOPX	HOP homeobox	1.874	3.66547	0.045358
1554251_at	Hs2.334722.1	HP1BP3	heterochromatin protein 1, binding protein 3	0.809	1.752	0.031599
229332_at	Hs.162717.0	HPDL	4-hydroxyphenylpyruvate dioxygenase-like	1.332	2.51751	0.013332
1565446_at	Hs2.384928.1	HPRT1	hypoxanthine phosphoribosyltransferase 1	1.496	2.8206	0.002048
210112_at	g2454272	HPS1	Hermansky-Pudlak syndrome 1	0.881	1.84165	0.021325
204544_at	g6005795	HPS5	Hermansky-Pudlak syndrome 5	0.662	1.58227	0.031583
229373_at	Hs.22223.0	HRH2	histamine receptor H2	1.055	2.07772	0.018134
231705_at	Hs.18426.1	HRSP12	heat-responsive protein 12	0.944	1.92385	0.01254
219985_at	g5174464	HS3ST3A1	heparan sulfate (glucosamine) 3-O-sulfotransferase 3A1	1.514	2.85601	0.005247
221062_at	g5174466	HS3ST3B1	heparan sulfate (glucosamine) 3-O-sulfotransferase 3B1	1.618	3.06949	0.019782
227361_at	Hs.159572.1	HS3ST3B1	heparan sulfate (glucosamine) 3-O-sulfotransferase 3B1	1.051	2.07197	0.038737
1552767_a_at	Hs2.82302.2	HS6ST2	heparan sulfate 6-O-sulfotransferase 2	4.07	16.7955	4e-05
230030_at	Hs.82302.0	HS6ST2	heparan sulfate 6-O-sulfotransferase 2	3.553	11.7371	6.6e-05
1552766_at	Hs2.82302.2	HS6ST2	heparan sulfate 6-O-sulfotransferase 2	2.27	4.82323	0.000795
219212_at	g10047093	HSPA14	heat shock 70kDa protein 14	1.399	2.63719	0.000746
226887_at	Hs.14294.0	HSPA14	heat shock 70kDa protein 14	0.661	1.58118	0.049386
211016_x_at	g12803406	HSPA4	heat shock 70kDa protein 4	0.859	1.81378	0.005863
208815_x_at	g4579908	HSPA4	heat shock 70kDa protein 4	0.769	1.70409	0.005269
200690_at	Hs.3069.0	HSPA9	heat shock 70kDa protein 9 (mortalin)	1.189	2.27995	0.014958
200691_s_at	g12653414	HSPA9	heat shock 70kDa protein 9 (mortalin)	0.968	1.95613	0.005151
200692_s_at	g4758569	HSPA9	heat shock 70kDa protein 9 (mortalin)	0.82	1.76541	0.012806
201841_s_at	g4996892	HSPB1	heat shock 27kDa protein 1	1.313	2.48458	0.034273
202415_s_at	g6912423	HSPBP1	HSPA (heat shock 70kDa) binding protein, cytoplasmic cochaperone 1	0.744	1.67481	0.019763
243372_at	Hs.259742.0	HSPD1	heat shock 60kDa protein 1 (chaperonin)	1.527	2.88186	0.015487
205133_s_at	g4504522	HSPE1	heat shock 10kDa protein 1	0.702	1.62676	0.00593
235573_at	Hs.201615.0	HSPH1	heat shock 105kDa/110kDa protein 1	2.205	4.61075	0.002516
208744_x_at	Hs.36927.1	HSPH1	heat shock 105kDa/110kDa protein 1	1.48	2.78949	0.001382
206976_s_at	g5729878	HSPH1	heat shock 105kDa/110kDa protein 1	1.398	2.63536	0.007507
228580_at	Hs.60440.1	HTRA3	HtrA serine peptidase 3	0.868	1.82513	0.026465
231983_at	Hs.237017.0	IBA57	IBA57 homolog, iron-sulfur cluster assembly	1.373	2.59009	0.016519
201611_s_at	g6912429	ICMT	isoprenylcysteine carboxyl methyltransferase	0.93	1.90528	0.0455
201565_s_at	g4504570	ID2	inhibitor of DNA binding 2, dominant negative helix-loop-helix protein	1.097	2.13909	0.039076
202070_s_at	g5031776	IDH3A	isocitrate dehydrogenase 3 (NAD+) alpha	0.674	1.59549	0.011137
211782_at	g13544076	IDS	iduronate 2-sulfatase	1.051	2.07197	0.035445
223071_at	g12052857	IER3IP1	immediate early response 3 interacting protein 1	0.681	1.60325	0.036147
226559_at	Hs.158549.0	IER5L	immediate early response 5-like	0.64	1.55833	0.048311
225615_at	Hs.13766.0	IFFO2	intermediate filament family orphan 2	0.76	1.69349	0.006689
201422_at	g5453695	IFI30	interferon, gamma-inducible protein 30	0.809	1.752	0.027436
223689_at	g7141071	IGF2BP1	insulin-like growth factor 2 mRNA binding protein 1	0.67	1.59107	0.047935
203851_at	g11321592	IGFBP6	insulin like growth factor binding protein 6	1.113	2.16295	0.005612
36004_at	4872434_RC	IKBKG	inhibitor of kappa light polypeptide gene enhancer in B-cells, kinase gamma	0.669	1.58997	0.007529
221092_at	g6912753	IKZF3	IKAROS family zinc finger 3	1.186	2.27521	0.026189
210233_at	g8050486	IL1RAP	interleukin 1 receptor accessory protein	1.27	2.41162	0.026336
221112_at	g11225606	IL1RAPL2	interleukin 1 receptor accessory protein-like 2	1.355	2.55797	0.003381
206569_at	g5803085	IL24	interleukin 24	3.94	15.3482	0.001082
205291_at	g4504664	IL2RB	interleukin 2 receptor, beta	2.132	4.38325	0.004173
211375_s_at	g5006601	ILF3	interleukin enhancer binding factor 3	0.662	1.58227	0.011881
212411_at	Hs.91579.0	IMP4	IMP4 homolog, U3 small nucleolar ribonucleoprotein	0.866	1.8226	0.019832
224469_s_at	g13544085	INF2	inverted formin, FH2 and WH2 domain containing	0.683	1.60547	0.00559
242293_at	Hs.171586.0	ING3	inhibitor of growth family member 3	1.405	2.64818	0.017722
230719_at	Hs.226930.0	ING3	inhibitor of growth family member 3	0.888	1.85061	0.023763
205258_at	g9257224	INHBB	inhibin beta B	1.045	2.06337	0.013162
237286_at	Hs.143946.0	INTS9	integrator complex subunit 9	0.691	1.6144	0.014623
211055_s_at	g13623522	INVS	inversin	1.684	3.21318	0.002635
1557770_at	Hs2.435994.1	IPO11	importin 11	0.908	1.87644	0.025968
218305_at	g13375908	IPO4	importin 4	1.147	2.21453	0.005876
211952_at	Hs.113503.0	IPO5	importin 5	0.912	1.88165	0.01485
222823_at	Hs.16603.0	IPPK	inositol 1,3,4,5,6-pentakisphosphate 2-kinase	1.008	2.01112	0.016891
219092_s_at	g12232422	IPPK	inositol 1,3,4,5,6-pentakisphosphate 2-kinase	0.832	1.78015	0.012587
239177_at	Hs.48349.0	IRGQ	immunity-related GTPase family, Q	0.868	1.82513	0.007529
221877_at	Hs.6217.0	IRGQ	immunity-related GTPase family, Q	0.809	1.752	0.023154
64488_at	4874023_RC	IRGQ	immunity-related GTPase family, Q	0.784	1.7219	0.022926
1555833_a_at	Hs2.6217.1	IRGQ	immunity-related GTPase family, Q	0.778	1.71475	0.02269
230472_at	Hs.109525.0	IRX1	iroquois homeobox 1	0.963	1.94936	0.016054
212766_s_at	Hs.301904.1	ISG20L2	interferon stimulated exonuclease gene 20kDa like 2	0.922	1.89474	0.044093
235182_at	Hs.135100.0	ISM1	isthmin 1, angiogenesis inhibitor	1.344	2.53854	0.048764
218893_at	g13376006	ISOC2	isochorismatase domain containing 2	0.694	1.61776	0.041499
239044_at	Hs.58893.0	ITFG1	integrin alpha FG-GAP repeat containing 1	1.245	2.37019	0.022196
215240_at	Hs.87149.2	ITGB3	integrin beta 3	1.016	2.0223	0.033328
240037_at	Hs.65009.0	ITPRIPL1	inositol 1,4,5-trisphosphate receptor interacting protein-like 1	1.364	2.57398	0.020533
240613_at	Hs.259438.0	JAK1	Janus kinase 1	0.64	1.55833	0.047
203298_s_at	g11863151	JARID2	jumonji, AT rich interactive domain 2	1.125	2.18102	0.002175
203297_s_at	Hs.40154.0	JARID2	jumonji, AT rich interactive domain 2	1.021	2.02933	0.000849
212723_at	Hs.72660.0	JMJD6	jumonji domain containing 6	0.829	1.77645	0.006047
212722_s_at	Hs.72660.0	JMJD6	jumonji domain containing 6	0.784	1.7219	0.011692
1553533_at	Hs2.378697.1	JPH1	junctophilin 1	0.769	1.70409	0.027413
229139_at	Hs.293836.0	JPH1	junctophilin 1	0.739	1.66902	0.032126
216361_s_at	Hs.283860.0	KAT6A	K(lysine) acetyltransferase 6A	1.166	2.24389	0.00217
202423_at	g5803097	KAT6A	K(lysine) acetyltransferase 6A	0.794	1.73388	0.013876
226547_at	Hs.93231.0	KAT6A	K(lysine) acetyltransferase 6A	0.731	1.65979	0.005224
204301_at	g7662259	KBTBD11	kelch repeat and BTB (POZ) domain containing 11	0.91	1.87905	0.00256
218570_at	g8922425	KBTBD4	kelch repeat and BTB (POZ) domain containing 4	0.715	1.64148	0.039256
218569_s_at	g8922425	KBTBD4	kelch repeat and BTB (POZ) domain containing 4	0.655	1.57462	0.034475
226479_at	Hs.112198.0	KBTBD6	kelch repeat and BTB (POZ) domain containing 6	1.093	2.13317	0.002048
1553111_a_at	Hs2.112198.1	KBTBD6	kelch repeat and BTB (POZ) domain containing 6	1.059	2.08349	0.004833
229298_at	Hs.46601.0	KBTBD7	kelch repeat and BTB (POZ) domain containing 7	0.865	1.82134	0.008901
243893_at	Hs.282231.0	KCNC3	potassium channel, voltage gated Shaw related subfamily C, member 3	1.468	2.76638	0.005779
1552897_a_at	Hs2.352633.1	KCNG3	potassium channel, voltage gated modifier subfamily G, member 3	0.972	1.96156	0.029771
210261_at	g4101565	KCNK2	potassium channel, two pore domain subfamily K, member 2	2.142	4.41373	0.023438
219615_s_at	g4504850	KCNK5	potassium channel, two pore domain subfamily K, member 5	1.762	3.39168	0.017532
205903_s_at	g4504856	KCNN3	potassium channel, calcium activated intermediate/small conductance subfamily N alpha, member 3	0.854	1.80751	0.011372
244040_at	Hs.212631.0	KCNN3	potassium channel, calcium activated intermediate/small conductance subfamily N alpha, member 3	0.679	1.60103	0.031068
204401_at	g4504858	KCNN4	potassium channel, calcium activated intermediate/small conductance subfamily N alpha, member 4	0.833	1.78139	0.031063
210508_s_at	g1841341	KCNQ2	potassium channel, voltage gated KQT-like subfamily Q, member 2	1.164	2.24078	0.004973
218474_s_at	g9506650	KCTD5	potassium channel tetramerization domain containing 5	0.779	1.71594	0.014492
207264_at	g8051610	KDELR3	KDEL (Lys-Asp-Glu-Leu) endoplasmic reticulum protein retention receptor 3	1.309	2.4777	0.01586
204017_at	g8051612	KDELR3	KDEL (Lys-Asp-Glu-Leu) endoplasmic reticulum protein retention receptor 3	1.137	2.19923	0.016587
207265_s_at	g8051610	KDELR3	KDEL (Lys-Asp-Glu-Leu) endoplasmic reticulum protein retention receptor 3	1.082	2.11697	0.03232
214185_at	Hs.119537.1	KHDRBS1	KH domain containing, RNA binding, signal transduction associated 1	1.014	2.0195	0.040947
209781_s_at	g3273831	KHDRBS3	KH domain containing, RNA binding, signal transduction associated 3	1.015	2.0209	0.048877
1553810_a_at	Hs2.151343.1	KIAA1524	KIAA1524	1.029	2.04061	0.037626
231869_at	Hs.180663.0	KIAA1586	KIAA1586	0.786	1.72429	0.024527
1561394_s_at	Hs2.425237.1	KIAA1755	KIAA1755	0.846	1.79751	0.026942
223520_s_at	g11761610	KIF13A	kinesin family member 13A	1.176	2.25949	0.027601
221258_s_at	g13654289	KIF18A	kinesin family member 18A	0.8	1.7411	0.016458
222039_at	Hs.274448.1	KIF18B	kinesin family member 18B	0.862	1.81756	0.028105
203849_s_at	Hs.259873.0	KIF1A	kinesin family member 1A	1.268	2.40827	0.005596
203850_s_at	g4757821	KIF1A	kinesin family member 1A	0.936	1.91322	0.021251
225482_at	Hs.259873.1	KIF1A	kinesin family member 1A	0.761	1.69466	0.026223
218755_at	g5032012	KIF20A	kinesin family member 20A	1.524	2.87587	0.010765
234744_x_at	Hs.307059.0	KIF20B	kinesin family member 20B	1.34	2.53151	0.007573
202183_s_at	g6453817	KIF22	kinesin family member 22	0.843	1.79378	0.014227
211519_s_at	g13432054	KIF2C	kinesin family member 2C	1.103	2.14801	0.048209
209408_at	g1695881	KIF2C	kinesin family member 2C	0.965	1.95206	0.012772
229405_at	Hs.119824.0	KIF7	kinesin family member 7	0.813	1.75686	0.01668
209680_s_at	g12653842	KIFC1	kinesin family member C1	0.699	1.62338	0.026848
223755_at	g12052831	KIRREL2	kin of IRRE like 2 (Drosophila)	0.953	1.93589	0.019392
205563_at	g4504872	KISS1	KiSS-1 metastasis-suppressor	0.93	1.90528	0.038471
211124_s_at	g4530470	KITLG	KIT ligand	1.519	2.86592	0.043664
1557165_s_at	Hs2.287312.1	KLHL18	kelch-like family member 18	1.301	2.464	0.018284
212882_at	Hs.22926.1	KLHL18	kelch-like family member 18	0.743	1.67365	0.020899
203068_at	g7662139	KLHL21	kelch-like family member 21	1.161	2.23612	0.007212
1554262_s_at	Hs2.348392.1	KLHL29	kelch-like family member 29	2.824	7.08123	0.003049
1554261_at	Hs2.348392.1	KLHL29	kelch-like family member 29	1.721	3.29665	0.000996
211790_s_at	g2358286	KMT2D	lysine (K)-specific methyltransferase 2D	0.713	1.63921	0.016909
211762_s_at	g13543656	KPNA2	karyopherin alpha 2 (RAG cohort 1, importin alpha 1)	1.06	2.08493	0.006934
213573_at	Hs.180446.2	KPNB1	karyopherin (importin) beta 1	0.868	1.82513	0.011562
203202_at	Hs.154762.0	KRR1	KRR1, small subunit (SSU) processome component, homolog (yeast)	0.691	1.6144	0.027908
203203_s_at	g5902047	KRR1	KRR1, small subunit (SSU) processome component, homolog (yeast)	0.682	1.60436	0.008344
209016_s_at	g12803726	KRT7	keratin 7, type II	0.75	1.68179	0.010167
1555673_at	Hs2Affx.1.428	KRTAP2-3	keratin associated protein 2-3	2.348	5.09118	0.047922
224885_s_at	Hs.288967.0	KRTCAP2	keratinocyte associated protein 2	1.304	2.46913	0.001878
233122_at	Hs.288967.1	KRTCAP2	keratinocyte associated protein 2	1.103	2.14801	0.02451
1554699_at	Hs2.95111.1	L3MBTL4	l(3)mbt-like 4 (Drosophila)	1.643	3.12315	0.031926
218701_at	g7705792	LACTB2	lactamase, beta 2	0.845	1.79626	0.049783
219061_s_at	g5174432	LAGE3	L antigen family, member 3	0.792	1.73147	0.012303
202202_s_at	g9845494	LAMA4	laminin, alpha 4	4.505	22.706	0.000155
210990_s_at	g1684836	LAMA4	laminin, alpha 4	2.716	6.57049	0.000618
216081_at	Hs.306904.0	LAMA4	laminin, alpha 4	2.334	5.04201	0.000727
210989_at	g1684836	LAMA4	laminin, alpha 4	1.937	3.82909	0.006425
210089_s_at	g13278992	LAMA4	laminin, alpha 4	1.92	3.78423	0.000774
201721_s_at	g5803055	LAPTM5	lysosomal protein transmembrane 5	1.104	2.1495	0.005754
201720_s_at	Hs.79356.0	LAPTM5	lysosomal protein transmembrane 5	0.703	1.62789	0.022489
212193_s_at	Hs.6214.1	LARP1	La ribonucleoprotein domain family, member 1	0.965	1.95206	0.007486
210966_x_at	g12655204	LARP1	La ribonucleoprotein domain family, member 1	0.802	1.74352	0.02322
238959_at	Hs.300657.0	LARP4	La ribonucleoprotein domain family, member 4	0.974	1.96428	0.033406
1555384_a_at	Hs2.26613.3	LARP4	La ribonucleoprotein domain family, member 4	0.951	1.93321	0.023712
238960_s_at	Hs.300657.0	LARP4	La ribonucleoprotein domain family, member 4	0.865	1.82134	0.005431
212714_at	Hs.26613.0	LARP4	La ribonucleoprotein domain family, member 4	0.714	1.64035	0.040178
235541_at	Hs.104432.0	LAS1L	LAS1-like, ribosome biogenesis factor	1.291	2.44698	0.017662
221011_s_at	g13569871	LBH	limb bud and heart development	1.731	3.31958	0.009966
1563899_at	Hs2.379337.1	LCTL	lactase-like	1.504	2.83628	0.025143
232018_at	Hs.172407.0	LENG1	leukocyte receptor cluster (LRC) member 1	0.712	1.63807	0.018262
202595_s_at	g6841445	LEPROTL1	leptin receptor overlapping transcript-like 1	1.108	2.15547	0.046515
1557415_s_at	Hs2.369065.1	LETM2	leucine zipper-EF-hand containing transmembrane protein 2	1.382	2.60629	0.005151
1552546_a_at	Hs2.125266.1	LETM2	leucine zipper-EF-hand containing transmembrane protein 2	1.115	2.16595	0.011065
201105_at	g6006015	LGALS1	lectin, galactoside-binding, soluble, 1	1.733	3.32418	0.0052
213880_at	Hs.285529.1	LGR5	leucine-rich repeat containing G protein-coupled receptor 5	1.375	2.59368	0.031955
231411_at	Hs.93765.1	LHFP	lipoma HMGIC fusion partner	1.13	2.18859	0.010765
218656_s_at	g5031864	LHFP	lipoma HMGIC fusion partner	0.916	1.88688	0.013002
235039_x_at	Hs.120817.0	LIN9	lin-9 DREAM MuvB core complex component	1.284	2.43513	0.018745
228614_at	Hs.128499.0	LINC00116	long intergenic non-protein coding RNA 116	0.724	1.65176	0.03312
1558930_at	Hs2.399747.1	LINC00460	long intergenic non-protein coding RNA 460	3.233	9.40221	0.005254
224443_at	g13543694	LINC00467	long intergenic non-protein coding RNA 467	1.459	2.74918	0.032691
1557597_at	Hs2.397913.1	LINC00624	long intergenic non-protein coding RNA 624	0.966	1.95342	0.023763
1559510_at	Hs2.291272.1	LINC00630	long intergenic non-protein coding RNA 630	0.724	1.65176	0.043563
235599_at	Hs.125346.0	LINC01139	long intergenic non-protein coding RNA 1139	2.89	7.4127	0.000773
242881_x_at	Hs.317584.1	LINC01296	long intergenic non-protein coding RNA 1296	0.886	1.84805	0.019731
224446_at	g13543703	LLPH	LLP homolog, long-term synaptic facilitation (Aplysia)	0.849	1.80125	0.013956
209779_at	g12005826	LLPH	LLP homolog, long-term synaptic facilitation (Aplysia)	0.716	1.64262	0.007894
227984_at	Hs.6382.0	LMF1	lipase maturation factor 1	2.67	6.36429	6.3e-05
1569872_a_at	Hs2.6382.2	LMF1	lipase maturation factor 1	2.561	5.90117	0.000665
46142_at	4858794	LMF1	lipase maturation factor 1	1.456	2.74347	0.048877
219135_s_at	Hs.58362.0	LMF1	lipase maturation factor 1	0.759	1.69232	0.013532
203411_s_at	g5031874	LMNA	lamin A/C	1.976	3.93401	0.000286
212089_at	Hs.77886.2	LMNA	lamin A/C	1.615	3.06312	0.000302
1554600_s_at	Hs2.377973.4	LMNA	lamin A/C	1.339	2.52976	0.000528
216952_s_at	Hs.76084.1	LMNB2	lamin B2	0.836	1.78509	0.00959
241180_at	Hs.282678.0	LOC100129112	uncharacterized LOC100129112	0.797	1.73748	0.010703
1558152_at	Hs2.378970.1	LOC100131262	uncharacterized LOC100131262	2.71	6.54322	0.018203
243581_at	Hs.169855.0	LOC100422526	proteasome activator subunit 3 pseudogene	0.83	1.77769	0.031583
241534_at	Hs.145225.0	LOC100505549	uncharacterized LOC100505549	1.078	2.11111	0.024755
238055_at	Hs.100501.0	LOC100505549	uncharacterized LOC100505549	0.638	1.55617	0.048052
1561979_at	Hs2.364988.1	LOC100505635	uncharacterized LOC100505635	0.638	1.55617	0.033068
1557386_at	Hs2.234571.1	LOC100507600	uncharacterized LOC100507600	1.693	3.23328	0.041397
1562274_at	Hs2.407123.1	LOC101928446	uncharacterized LOC101928446	1.084	2.11991	0.019832
231334_at	Hs.154060.0	LOC101929480	uncharacterized LOC101929480	1.19	2.28153	0.004142
229455_at	Hs.176669.0	LOC102723694	uncharacterized LOC102723694	0.787	1.72548	0.042178
228717_at	Hs.19312.0	LOC102723864	uncharacterized LOC102723864	1.128	2.18556	0.01839
239624_at	Hs.120456.0	LOC102724689	uncharacterized LOC102724689	0.752	1.68413	0.018193
240069_at	Hs.115519.0	LOC102724880	uncharacterized LOC102724880	0.826	1.77276	0.029849
240616_at	Hs.285896.0	LOC105370333	uncharacterized LOC105370333	0.743	1.67365	0.036691
222085_at	Hs.27373.1	LOC105370977	uncharacterized LOC105370977	1.316	2.48975	0.005745
239856_at	Hs.21810.0	LOC105374937	uncharacterized LOC105374937	0.92	1.89212	0.004188
244218_at	Hs.133552.0	LOC105375492	uncharacterized LOC105375492	0.684	1.60659	0.029415
1566902_at	Hs2.377050.1	LOC105378726	uncharacterized LOC105378726	0.684	1.60659	0.042611
225934_at	Hs.182698.1	LOC148413	uncharacterized LOC148413	1.096	2.13761	0.006768
1564385_at	Hs2.350848.2	LOC219688	uncharacterized LOC219688	0.933	1.90924	0.022962
1556425_a_at	Hs2.297432.1	LOC284219	uncharacterized LOC284219	1.365	2.57576	0.010914
230179_at	Hs.13702.0	LOC285812	uncharacterized LOC285812	0.747	1.6783	0.00959
244631_at	Hs.188554.0	LOC389834	ankyrin repeat domain 57 pseudogene	0.86	1.81504	0.021138
238717_at	Hs.44441.0	LOC441528	zinc finger protein 839-like	2.315	4.97605	0.001751
230889_at	Hs.313182.0	LOC645321	uncharacterized LOC645321	0.993	1.99032	0.008176
220698_at	g13236554	LOC79160	uncharacterized LOC79160	1.66	3.16017	0.016809
208107_s_at	g13569912	LOC81691	exonuclease NEF-sp	1.362	2.57041	0.008397
207584_at	g5031884	LPA	lipoprotein, Lp(a)	0.925	1.89868	0.041668
220816_at	g6912347	LPAR3	lysophosphatidic acid receptor 3	0.67	1.59107	0.023032
226908_at	Hs.19669.0	LRIG3	leucine-rich repeats and immunoglobulin-like domains 3	1.349	2.54735	0.006707
213909_at	Hs.288467.0	LRRC15	leucine rich repeat containing 15	0.651	1.57026	0.039004
212904_at	Hs.268488.0	LRRC47	leucine rich repeat containing 47	0.787	1.72548	0.020238
222231_s_at	Hs.283558.4	LRRC59	leucine rich repeat containing 59	1.055	2.07772	0.002606
215375_x_at	Hs.287604.0	LRRFIP1	leucine rich repeat (in FLII) interacting protein 1	0.847	1.79876	0.032785
225680_at	Hs.274135.0	LRWD1	leucine-rich repeats and WD repeat domain containing 1	1.055	2.07772	0.019687
203534_at	g7657312	LSM1	LSM1 homolog, mRNA degradation associated	1.085	2.12138	0.00959
241599_at	Hs.187117.0	LSM11	LSM11, U7 small nuclear RNA associated	0.909	1.87774	0.003791
204559_s_at	g7706422	LSM7	LSM7 homolog, U6 small nuclear RNA and mRNA degradation associated	0.954	1.93724	0.048205
239212_at	Hs.33944.0	LTV1	LTV1 ribosome biogenesis factor	1.07	2.09943	0.026748
223413_s_at	Hs.71040.0	LYAR	Ly1 antibody reactive	0.92	1.89212	0.00718
223414_s_at	g12053016	LYAR	Ly1 antibody reactive	0.781	1.71832	0.019497
47550_at	4860464_RC	LZTS1	leucine zipper, putative tumor suppressor 1	2.419	5.348	0.007573
219042_at	g10440565	LZTS1	leucine zipper, putative tumor suppressor 1	1.467	2.76446	0.004467
1569159_at	Hs2.407465.1	LZTS1	leucine zipper, putative tumor suppressor 1	1.098	2.14058	0.032457
221719_s_at	g4572465	LZTS1	leucine zipper, putative tumor suppressor 1	0.861	1.8163	0.021806
221722_x_at	g4572461	LZTS1	leucine zipper, putative tumor suppressor 1	0.729	1.65749	0.007529
1554768_a_at	Hs2.79078.2	MAD2L1	MAD2 mitotic arrest deficient-like 1 (yeast)	0.728	1.65634	0.03813
209942_x_at	g12653144	MAGEA3	MAGE family member A3	1.171	2.25168	0.012954
214612_x_at	Hs.278460.0	MAGEA6	MAGE family member A6	1.166	2.24389	0.007344
210093_s_at	g4894379	MAGOH	mago homolog, exon junction complex core component	0.677	1.59881	0.010914
218894_s_at	g8922330	MAGOHB	mago homolog B, exon junction complex core component	0.808	1.75078	0.020202
211686_s_at	g13625185	MAK16	MAK16 homolog	1.179	2.2642	0.002057
230516_at	Hs.87385.1	MALSU1	mitochondrial assembly of ribosomal large subunit 1	0.839	1.78881	0.008248
228885_at	Hs.131987.0	MAMDC2	MAM domain containing 2	1.178	2.26263	0.022911
226132_s_at	Hs.7988.0	MANEAL	mannosidase, endo-alpha-like	1.354	2.5562	0.033922
215498_s_at	Hs.180533.2	MAP2K3	mitogen-activated protein kinase kinase 3	1.516	2.85997	0.020173
215499_at	Hs.180533.2	MAP2K3	mitogen-activated protein kinase kinase 3	1.045	2.06337	0.030451
207667_s_at	g4506098	MAP2K3	mitogen-activated protein kinase kinase 3	0.871	1.82893	0.011109
205448_s_at	g5454183	MAP3K12	mitogen-activated protein kinase kinase kinase 12	0.858	1.81252	0.040538
230921_s_at	Hs.63525.1	MAP3K12	mitogen-activated protein kinase kinase kinase 12	0.742	1.67249	0.039072
219626_at	g13375794	MAP7D3	MAP7 domain containing 3	1.061	2.08638	0.003923
219576_at	g13376106	MAP7D3	MAP7 domain containing 3	0.902	1.86865	0.006335
202787_s_at	g1256004	MAPKAPK3	mitogen-activated protein kinase-activated protein kinase 3	0.857	1.81127	0.019832
213256_at	Hs.124969.0	MARCH3	membrane associated ring finger 3	1.251	2.38006	0.002143
226726_at	Hs.15641.0	MBOAT2	membrane bound O-acyltransferase domain containing 2	1.337	2.52625	0.005752
211340_s_at	g529723	MCAM	melanoma cell adhesion molecule	0.896	1.8609	0.016937
209087_x_at	g4336423	MCAM	melanoma cell adhesion molecule	0.846	1.79751	0.01586
210869_s_at	g530047	MCAM	melanoma cell adhesion molecule	0.772	1.70764	0.015715
211042_x_at	g13623456	MCAM	melanoma cell adhesion molecule	0.657	1.5768	0.025056
212246_at	Hs.84775.0	MCFD2	multiple coagulation factor deficiency 2	1.017	2.02371	0.018134
220651_s_at	g8924142	MCM10	minichromosome maintenance 10 replication initiation factor	2.148	4.43213	0.031883
222962_s_at	g11527601	MCM10	minichromosome maintenance 10 replication initiation factor	2.053	4.14968	0.0312
223570_at	g12053186	MCM10	minichromosome maintenance 10 replication initiation factor	1.393	2.62624	0.01855
212141_at	Hs.154443.0	MCM4	minichromosome maintenance complex component 4	1.115	2.16595	0.016912
212142_at	Hs.154443.0	MCM4	minichromosome maintenance complex component 4	0.988	1.98343	0.032118
1554155_at	Hs2.23782.2	MCPH1	microcephalin 1	1.71	3.27161	0.007204
228778_at	Hs.48419.0	MCPH1	microcephalin 1	1.537	2.9019	0.00041
218163_at	g7662501	MCTS1	malignant T-cell amplified sequence 1	1.263	2.39994	0.006939
220094_s_at	g13430855	MCUR1	mitochondrial calcium uniporter regulator 1	0.928	1.90264	0.021644
1559942_at	Hs2.434366.1	MDFIC	MyoD family inhibitor domain containing	1.377	2.59728	0.012608
213333_at	Hs.111076.1	MDH2	malate dehydrogenase 2	1.024	2.03355	0.009966
209036_s_at	g12804928	MDH2	malate dehydrogenase 2	0.79	1.72907	0.014197
220397_at	g9910417	MDM1	Mdm1 nuclear protein	0.875	1.83401	0.023723
202618_s_at	g972764	MECP2	methyl-CpG binding protein 2	0.759	1.69232	0.034273
244611_at	Hs.85481.0	MED13	mediator complex subunit 13	0.964	1.95071	0.036134
1553993_s_at	Hs2.293678.2	MED25	mediator complex subunit 25	1.132	2.19162	0.018825
227538_at	Hs.4867.3	MED26	mediator complex subunit 26	1.057	2.0806	0.007059
51176_at	4870921	MED27	mediator complex subunit 27	0.894	1.85832	0.00238
217843_s_at	g7661787	MED4	mediator complex subunit 4	0.691	1.6144	0.034794
222438_at	Hs.181112.0	MED4	mediator complex subunit 4	0.636	1.55401	0.022556
213126_at	Hs.301756.0	MED8	mediator complex subunit 8	0.992	1.98894	0.020943
213127_s_at	Hs.301756.0	MED8	mediator complex subunit 8	0.931	1.9066	0.027455
213696_s_at	Hs.301756.2	MED8	mediator complex subunit 8	0.835	1.78386	0.01467
237265_at	Hs.127567.0	MEIOB	meiosis specific with OB domains	2.78	6.86852	5.6e-05
206201_s_at	g5174548	MEOX2	mesenchyme homeobox 2	0.657	1.5768	0.02167
219798_s_at	g9624989	MEPCE	methylphosphate capping enzyme	1.373	2.59009	0.02563
202016_at	g4505154	MEST	mesoderm specific transcript	3.742	13.3799	0.040432
213899_at	Hs.78935.2	METAP2	methionyl aminopeptidase 2	1.029	2.04061	0.003583
227993_at	Hs.78935.3	METAP2	methionyl aminopeptidase 2	0.872	1.8302	0.013604
225955_at	Hs.300870.3	METRNL	meteorin, glial cell differentiation regulator-like	0.966	1.95342	0.04082
212407_at	Hs.19469.0	METTL13	methyltransferase like 13	1.652	3.14269	0.016458
212405_s_at	Hs.19469.0	METTL13	methyltransferase like 13	1.139	2.20228	0.001242
206468_s_at	g7706255	METTL13	methyltransferase like 13	1.046	2.0648	0.016673
226220_at	Hs.279583.1	METTL9	methyltransferase like 9	0.702	1.62676	0.041832
203417_at	g9665258	MFAP2	microfibrillar associated protein 2	1.414	2.66475	0.002517
210493_s_at	g12654870	MFAP3L	microfibrillar associated protein 3 like	1.218	2.32624	0.005119
201155_s_at	g7662003	MFN2	mitofusin 2	0.699	1.62338	0.020118
204153_s_at	g4505158	MFNG	MFNG O-fucosylpeptide 3-beta-N-acetylglucosaminyltransferase	0.7	1.6245	0.027684
202291_s_at	g4505178	MGP	matrix Gla protein	2.117	4.33791	0.044784
206560_s_at	g5729924	MIA	melanoma inhibitory activity	0.837	1.78633	0.009966
212473_s_at	Hs.198793.0	MICAL2	microtubule associated monooxygenase, calponin and LIM domain containing 2	1.561	2.95058	0.007483
206275_s_at	g7662283	MICAL2	microtubule associated monooxygenase, calponin and LIM domain containing 2	1.46	2.75108	0.0018
212472_at	Hs.198793.0	MICAL2	microtubule associated monooxygenase, calponin and LIM domain containing 2	1.261	2.39662	0.010329
236475_at	Hs.6927.0	MICAL2	microtubule associated monooxygenase, calponin and LIM domain containing 2	1.206	2.30697	0.032197
229474_at	Hs.165551.0	MICAL3	microtubule associated monooxygenase, calponin and LIM domain containing 3	1.035	2.04911	0.010699
243611_at	Hs.97459.0	MICALCL	MICAL C-terminal like	1.671	3.18435	0.009391
55081_at	4876617_RC	MICALL1	MICAL-like 1	1.196	2.29104	0.008636
221779_at	Hs.8535.0	MICALL1	MICAL-like 1	0.978	1.96973	0.006398
203636_at	Hs.27695.0	MID1	midline 1	1.324	2.50359	0.036794
203637_s_at	g4557752	MID1	midline 1	1.21	2.31338	0.019076
204593_s_at	Hs.240062.0	MIEF1	mitochondrial elongation factor 1	1.27	2.41162	0.001913
204594_s_at	g9558736	MIEF1	mitochondrial elongation factor 1	1.063	2.08927	0.004016
224319_s_at	g12053052	MIEF1	mitochondrial elongation factor 1	0.956	1.93992	0.026748
221516_s_at	g12803520	MIEF1	mitochondrial elongation factor 1	0.925	1.89868	0.004142
235428_at	Hs.104480.0	MINCR	MYC-induced long noncoding RNA	1.489	2.80694	0.025857
219004_s_at	g9506436	MIS18A	MIS18 kinetochore protein A	1.002	2.00277	0.01438
229671_s_at	Hs.49932.1	MIS18A	MIS18 kinetochore protein A	0.963	1.94936	0.016114
212022_s_at	Hs.80976.1	MKI67	marker of proliferation Ki-67	1.459	2.74918	0.005117
212021_s_at	Hs.80976.1	MKI67	marker of proliferation Ki-67	1.208	2.31017	0.025056
212023_s_at	Hs.80976.1	MKI67	marker of proliferation Ki-67	0.822	1.76786	0.028798
215291_at	Hs.134751.0	MKL1	megakaryoblastic leukemia (translocation) 1	0.918	1.88949	0.002496
215292_s_at	Hs.134751.0	MKL1	megakaryoblastic leukemia (translocation) 1	0.829	1.77645	0.009297
1559902_at	Hs2.433153.2	MKL1	megakaryoblastic leukemia (translocation) 1	0.693	1.61664	0.019666
212748_at	Hs.31146.0	MKL1	megakaryoblastic leukemia (translocation) 1	0.671	1.59218	0.041269
230122_at	Hs.34727.0	MLLT10	myeloid/lymphoid or mixed-lineage leukemia; translocated to, 10	0.803	1.74473	0.003926
210752_s_at	g11761691	MLX	MLX, MAX dimerization protein	0.89	1.85318	0.020744
213708_s_at	Hs.279032.1	MLX	MLX, MAX dimerization protein	0.687	1.60993	0.006735
217910_x_at	g7019460	MLX	MLX, MAX dimerization protein	0.648	1.56699	0.00784
217909_s_at	Hs.78185.0	MLX	MLX, MAX dimerization protein	0.645	1.56374	0.046634
211774_s_at	g13543966	MMACHC	methylmalonic aciduria (cobalamin deficiency) cblC type, with homocystinuria	0.78	1.71713	0.011293
203435_s_at	g6042199	MME	membrane metallo-endopeptidase	0.894	1.85832	0.016936
204575_s_at	g2228243	MMP19	matrix metallopeptidase 19	1.316	2.48975	0.010658
205330_at	g4505222	MN1	meningioma (disrupted in balanced translocation) 1	1.254	2.38502	0.013067
224500_s_at	g13623406	MON1A	MON1 secretory trafficking family member A	0.862	1.81756	0.008145
202427_s_at	g7661601	MPC2	mitochondrial pyruvate carrier 2	1.047	2.06623	0.011247
212885_at	Hs.201676.0	MPHOSPH10	M-phase phosphoprotein 10 (U3 small nucleolar ribonucleoprotein)	1.151	2.22068	0.00603
233651_s_at	Hs.76925.1	MPND	MPN domain containing	0.736	1.66555	0.003237
202974_at	g6006024	MPP1	membrane protein, palmitoylated 1	1.13	2.18859	0.030359
214771_x_at	Hs.84883.2	MPRIP	myosin phosphatase Rho interacting protein	0.763	1.69702	0.005432
212197_x_at	Hs.84883.0	MPRIP	myosin phosphatase Rho interacting protein	0.689	1.61217	0.005567
210594_x_at	g7542562	MPZL1	myelin protein zero-like 1	0.991	1.98756	0.025837
1555741_at	Hs2.367923.3	MRAP	melanocortin 2 receptor accessory protein	0.831	1.77892	0.022728
227226_at	Hs.20953.0	MRAP2	melanocortin 2 receptor accessory protein 2	1.003	2.00416	0.002036
203931_s_at	g4506672	MRPL12	mitochondrial ribosomal protein L12	1.1	2.14355	0.005596
229165_at	Hs.109059.1	MRPL12	mitochondrial ribosomal protein L12	0.879	1.8391	0.007423
218027_at	g7661805	MRPL15	mitochondrial ribosomal protein L15	1.242	2.36526	0.000618
222216_s_at	Hs.10026.1	MRPL17	mitochondrial ribosomal protein L17	0.939	1.9172	0.007204
220526_s_at	g8922189	MRPL20	mitochondrial ribosomal protein L20	0.712	1.63807	0.014945
225315_at	Hs.286.2	MRPL21	mitochondrial ribosomal protein L21	0.972	1.96156	0.002292
218270_at	g13375698	MRPL24	mitochondrial ribosomal protein L24	0.944	1.92385	0.014896
224330_s_at	g13559384	MRPL27	mitochondrial ribosomal protein L27	0.644	1.56266	0.01217
218890_x_at	g7706161	MRPL35	mitochondrial ribosomal protein L35	1.042	2.05908	0.001441
225255_at	Hs.93814.1	MRPL35	mitochondrial ribosomal protein L35	0.634	1.55186	0.019163
222993_at	g12330684	MRPL37	mitochondrial ribosomal protein L37	0.875	1.83401	0.044545
223743_s_at	g12653924	MRPL4	mitochondrial ribosomal protein L4	1.066	2.09362	0.013149
218105_s_at	g7705721	MRPL4	mitochondrial ribosomal protein L4	0.893	1.85703	0.013693
223742_at	g12653924	MRPL4	mitochondrial ribosomal protein L4	0.852	1.805	0.015717
221936_x_at	Hs.44017.3	MRPL41	mitochondrial ribosomal protein L41	0.876	1.83528	0.013045
225423_x_at	Hs.44017.2	MRPL41	mitochondrial ribosomal protein L41	0.875	1.83401	0.035873
230034_x_at	Hs.44017.4	MRPL41	mitochondrial ribosomal protein L41	0.836	1.78509	0.031798
227186_s_at	Hs.44017.3	MRPL41	mitochondrial ribosomal protein L41	0.803	1.74473	0.027766
219244_s_at	g11545915	MRPL46	mitochondrial ribosomal protein L46	0.651	1.57026	0.027259
225580_at	Hs.288224.1	MRPL50	mitochondrial ribosomal protein L50	0.819	1.76418	0.019408
225581_s_at	Hs.288224.1	MRPL50	mitochondrial ribosomal protein L50	0.716	1.64262	0.005233
227024_s_at	Hs.237924.3	MRPL55	mitochondrial ribosomal protein L55	0.775	1.71119	0.047096
224535_s_at	g13620914	MRPL57	mitochondrial ribosomal protein L57	0.831	1.77892	0.017072
204386_s_at	Hs.182695.0	MRPL57	mitochondrial ribosomal protein L57	0.788	1.72668	0.011315
211595_s_at	g13620888	MRPS11	mitochondrial ribosomal protein S11	1.017	2.02371	0.003687
213840_s_at	Hs.9964.2	MRPS12	mitochondrial ribosomal protein S12	1.253	2.38337	0.002488
203800_s_at	Hs.247324.0	MRPS14	mitochondrial ribosomal protein S14	0.644	1.56266	0.030856
218046_s_at	g7705625	MRPS16	mitochondrial ribosomal protein S16	0.93	1.90528	0.028269
221693_s_at	g13620904	MRPS18A	mitochondrial ribosomal protein S18A	0.739	1.66902	0.019957
224869_s_at	Hs.23450.1	MRPS25	mitochondrial ribosomal protein S25	0.698	1.62225	0.010135
219819_s_at	g7661729	MRPS28	mitochondrial ribosomal protein S28	0.645	1.56374	0.022811
227600_at	Hs.124165.0	MRPS30	mitochondrial ribosomal protein S30	0.656	1.57571	0.046112
218112_at	g13027603	MRPS34	mitochondrial ribosomal protein S34	0.667	1.58777	0.035686
217932_at	g7705737	MRPS7	mitochondrial ribosomal protein S7	0.893	1.85703	0.016101
228542_at	Hs.30057.2	MRS2	MRS2 magnesium transporter	0.861	1.8163	0.014561
220688_s_at	g7705874	MRTO4	MRT4 homolog, ribosome maturation factor	1.078	2.11111	0.032804
209421_at	g432997	MSH2	mutS homolog 2	0.741	1.67133	0.02372
243010_at	Hs.103512.0	MSI2	musashi RNA binding protein 2	1.76	3.38698	0.004349
219281_at	g13259538	MSRA	methionine sulfoxide reductase A	1.677	3.19762	0.00527
240031_at	Hs.98908.0	MSRA	methionine sulfoxide reductase A	1.316	2.48975	0.010828
1554127_s_at	Hs2.339024.1	MSRB3	methionine sulfoxide reductase B3	0.729	1.65749	0.048221
222584_at	Hs.279763.0	MSTO1	misato 1, mitochondrial distribution and morphology regulator	1.199	2.2958	0.02269
224233_s_at	g12803422	MSTO1	misato 1, mitochondrial distribution and morphology regulator	1.004	2.00555	0.009752
1563614_at	Hs2.368757.1	MTBP	MDM2 binding protein	1.773	3.41764	0.00605
217772_s_at	g7657346	MTCH2	mitochondrial carrier 2	0.709	1.63467	0.047952
232314_at	Hs.97603.0	MTFR1	mitochondrial fission regulator 1	0.699	1.62338	0.040759
228069_at	Hs.121536.0	MTFR2	mitochondrial fission regulator 2	1.824	3.54062	0.002702
234945_at	Hs.121536.1	MTFR2	mitochondrial fission regulator 2	1.747	3.3566	0.003179
234944_s_at	Hs.121536.1	MTFR2	mitochondrial fission regulator 2	1.669	3.17994	0.002831
226606_s_at	Hs.35389.0	MTG2	mitochondrial ribosome-associated GTPase 2	1.292	2.44867	0.014148
231094_s_at	Hs.44155.1	MTHFD1L	methylenetetrahydrofolate dehydrogenase (NADP+ dependent) 1-like	0.943	1.92252	0.02485
218947_s_at	g8922453	MTPAP	mitochondrial poly(A) polymerase	0.93	1.90528	0.005999
222794_x_at	Hs.173946.0	MTPAP	mitochondrial poly(A) polymerase	0.709	1.63467	0.022196
233873_x_at	Hs.173946.2	MTPAP	mitochondrial poly(A) polymerase	0.694	1.61776	0.029224
203774_at	g4557764	MTR	5-methyltetrahydrofolate-homocysteine methyltransferase	0.775	1.71119	0.013368
242996_at	Hs.246268.0	MTRF1	mitochondrial translational release factor 1	1.335	2.52275	0.001361
210386_s_at	g12804906	MTX1	metaxin 1	0.917	1.88818	0.006341
224920_x_at	Hs.278528.1	MYADM	myeloid-associated differentiation marker	1.435	2.70382	0.019405
233803_s_at	Hs.22824.2	MYBBP1A	MYB binding protein (P160) 1a	0.983	1.97657	0.027394
213906_at	Hs.300592.0	MYBL1	v-myb avian myeloblastosis viral oncogene homolog-like 1	1.13	2.18859	0.014726
216222_s_at	Hs.61638.1	MYO10	myosin X	1.07	2.09943	0.012429
219320_at	g13376680	MYO19	myosin XIX	0.997	1.99585	0.035123
203025_at	g10835056	NAA10	N(alpha)-acetyltransferase 10, NatA catalytic subunit	0.917	1.88818	0.00688
208918_s_at	Hs.220324.2	NADK	NAD kinase	1.437	2.70757	0.004132
229757_at	Hs.129095.0	NAF1	nuclear assembly factor 1 ribonucleoprotein	0.73	1.65864	0.041861
204749_at	g4758757	NAP1L3	nucleosome assembly protein 1-like 3	1.163	2.23923	0.009361
208751_at	g12654654	NAPA	N-ethylmaleimide-sensitive factor attachment protein, alpha	0.723	1.65061	0.019594
206491_s_at	g4505328	NAPA	N-ethylmaleimide-sensitive factor attachment protein, alpha	0.659	1.57899	0.034334
226707_at	Hs.9614.3	NAPRT	nicotinate phosphoribosyltransferase	0.971	1.9602	0.022325
214440_at	Hs.155956.0	NAT1	N-acetyltransferase 1 (arylamine N-acetyltransferase)	1.081	2.1155	0.044988
217884_at	g13399321	NAT10	N-acetyltransferase 10 (GCN5-related)	1.527	2.88186	0.012023
236273_at	Hs.247677.0	NBPF1	neuroblastoma breakpoint family, member 1	1.087	2.12432	0.015165
212789_at	Hs.13421.0	NCAPD3	non-SMC condensin II complex subunit D3	0.941	1.91986	0.008248
218663_at	g11641252	NCAPG	non-SMC condensin I complex subunit G	0.778	1.71475	0.018087
212949_at	Hs.1192.0	NCAPH	non-SMC condensin I complex subunit H	1.003	2.00416	0.019832
204162_at	g5174456	NDC80	NDC80 kinetochore complex component	0.907	1.87514	0.025955
1554010_at	Hs2.20894.2	NDST1	N-deacetylase/N-sulfotransferase (heparan glucosaminyl) 1	1.425	2.68515	0.001382
202298_at	g13699820	NDUFA1	NADH dehydrogenase (ubiquinone) 1 alpha subcomplex, 1, 7.5kDa	0.824	1.77031	0.005164
1554719_at	Hs2.198271.2	NDUFA10	NADH dehydrogenase (ubiquinone) 1 alpha subcomplex, 10, 42kDa	1.202	2.30058	0.047473
225304_s_at	Hs.1665.1	NDUFA11	NADH dehydrogenase (ubiquinone) 1 alpha subcomplex, 11, 14.7kDa	1.064	2.09072	0.0158
228690_s_at	Hs.1665.2	NDUFA11	NADH dehydrogenase (ubiquinone) 1 alpha subcomplex, 11, 14.7kDa	0.876	1.83528	0.024447
218563_at	g4758771	NDUFA3	NADH dehydrogenase (ubiquinone) 1 alpha subcomplex, 3, 9kDa	0.917	1.88818	0.024077
202001_s_at	g4505358	NDUFA6	NADH dehydrogenase (ubiquinone) 1 alpha subcomplex, 6, 14kDa	1.448	2.7283	0.001257
202000_at	g12803858	NDUFA6	NADH dehydrogenase (ubiquinone) 1 alpha subcomplex, 6, 14kDa	1.007	2.00973	0.01303
209177_at	g12804040	NDUFAF3	NADH dehydrogenase (ubiquinone) complex I, assembly factor 3	0.935	1.91189	0.01532
219006_at	g7661785	NDUFAF4	NADH dehydrogenase (ubiquinone) complex I, assembly factor 4	1.155	2.22684	0.002366
228301_x_at	Hs.198274.1	NDUFB10	NADH dehydrogenase (ubiquinone) 1 beta subcomplex, 10, 22kDa	0.766	1.70055	0.038357
218320_s_at	g9506682	NDUFB11	NADH dehydrogenase (ubiquinone) 1 beta subcomplex, 11, 17.3kDa	0.656	1.57571	0.01718
202839_s_at	g10764846	NDUFB7	NADH dehydrogenase (ubiquinone) 1 beta subcomplex, 7, 18kDa	0.806	1.74836	0.045599
201740_at	g4758787	NDUFS3	NADH dehydrogenase (ubiquinone) Fe-S protein 3, 30kDa (NADH-coenzyme Q reductase)	0.772	1.70764	0.012483
211752_s_at	g13543602	NDUFS7	NADH dehydrogenase (ubiquinone) Fe-S protein 7, 20kDa (NADH-coenzyme Q reductase)	0.949	1.93053	0.01728
202149_at	Hs.80261.0	NEDD9	neural precursor cell expressed, developmentally down-regulated 9	1.858	3.62505	0.031926
202150_s_at	g1490786	NEDD9	neural precursor cell expressed, developmentally down-regulated 9	0.843	1.79378	0.040148
214072_x_at	Hs.109494.1	NENF	neudesin neurotrophic factor	0.985	1.97931	0.015542
218407_x_at	g7019544	NENF	neudesin neurotrophic factor	0.881	1.84165	0.028302
214125_s_at	Hs.109494.3	NENF	neudesin neurotrophic factor	0.875	1.83401	0.027971
213673_x_at	Hs.109494.2	NENF	neudesin neurotrophic factor	0.862	1.81756	0.03232
218406_x_at	Hs.109494.0	NENF	neudesin neurotrophic factor	0.86	1.81504	0.022298
214075_at	Hs.109494.1	NENF	neudesin neurotrophic factor	0.76	1.69349	0.029549
218888_s_at	g8922419	NETO2	neuropilin (NRP) and tolloid (TLL)-like 2	1.086	2.12285	0.010061
222774_s_at	Hs.6823.0	NETO2	neuropilin (NRP) and tolloid (TLL)-like 2	1.053	2.07484	0.002048
210767_at	g13111888	NF2	neurofibromin 2 (merlin)	0.971	1.9602	0.010965
243645_at	Hs.312115.0	NFASC	neurofascin	1.481	2.79142	0.000959
228442_at	Hs.112157.0	NFATC2	nuclear factor of activated T-cells, cytoplasmic, calcineurin-dependent 2	1.052	2.0734	0.007507
226991_at	Hs.102248.0	NFATC2	nuclear factor of activated T-cells, cytoplasmic, calcineurin-dependent 2	0.701	1.62563	0.030613
228388_at	Hs.9731.0	NFKBIB	nuclear factor of kappa light polypeptide gene enhancer in B-cells inhibitor, beta	0.971	1.9602	0.01718
237210_at	Hs.167006.0	NFRKB	nuclear factor related to kappaB binding protein	1.106	2.15248	0.004646
211797_s_at	g1669493	NFYC	nuclear transcription factor Y subunit gamma	0.785	1.72309	0.006689
211251_x_at	g2327008	NFYC	nuclear transcription factor Y subunit gamma	0.647	1.56591	0.01363
205858_at	g4505392	NGFR	nerve growth factor receptor	1.348	2.54559	0.011204
209104_s_at	g12652540	NHP2	NHP2 ribonucleoprotein	0.917	1.88818	0.020202
1561082_at	Hs2.396253.1	NID1	nidogen 1	0.653	1.57243	0.030935
230188_at	Hs.4285.0	NIPAL4	NIPA-like domain containing 4	2.993	7.96128	0.015829
222105_s_at	Hs.22937.1	NKIRAS2	NFKB inhibitor interacting Ras-like 2	0.638	1.55617	0.039603
205004_at	g8923943	NKRF	NFKB repressing factor	1.12	2.17347	0.00784
1552531_a_at	Hs2.375039.1	NLRP11	NLR family, pyrin domain containing 11	1.105	2.15099	0.013496
207075_at	g4757727	NLRP3	NLR family, pyrin domain containing 3	0.997	1.99585	0.023115
201577_at	g4557796	NME1	NME/NM23 nucleoside diphosphate kinase 1	0.956	1.93992	0.010221
1556029_s_at	Hs2.407361.1	NMNAT2	nicotinamide nucleotide adenylyltransferase 2	0.899	1.86477	0.003848
201157_s_at	Hs.111039.0	NMT1	N-myristoyltransferase 1	1.088	2.12579	0.023715
202115_s_at	g7661605	NOC2L	NOC2-like nucleolar associated transcriptional repressor	0.926	1.9	0.005596
218860_at	g13129067	NOC4L	nucleolar complex associated 4 homolog	0.801	1.74231	0.016114
1554283_at	Hs2.352352.1	NOCT	nocturnin	1.096	2.13761	0.032197
221970_s_at	Hs.321105.0	NOL11	nucleolar protein 11	1.013	2.0181	0.048465
219324_at	g13236552	NOL12	nucleolar protein 12	0.95	1.93187	0.01494
222057_at	Hs.326372.1	NOL12	nucleolar protein 12	0.891	1.85446	0.047935
202882_x_at	g13569842	NOL7	nucleolar protein 7	0.893	1.85703	0.010685
210097_s_at	Hs.106346.1	NOL7	nucleolar protein 7	0.886	1.84805	0.009131
218244_at	g8923662	NOL8	nucleolar protein 8	1.047	2.06623	0.039776
1554082_a_at	Hs2.59425.2	NOL9	nucleolar protein 9	1.315	2.48802	0.004953
205895_s_at	g4758859	NOLC1	nucleolar and coiled-body phosphoprotein 1	1.347	2.54383	0.0441
211949_s_at	Hs.75337.1	NOLC1	nucleolar and coiled-body phosphoprotein 1	0.98	1.97247	0.026172
211951_at	Hs.75337.1	NOLC1	nucleolar and coiled-body phosphoprotein 1	0.716	1.64262	0.046186
242922_at	Hs.248691.0	NOMO3	NODAL modulator 3	1.046	2.0648	0.004005
203023_at	g7705450	NOP16	NOP16 nucleolar protein	1.861	3.63259	0.000677
214011_s_at	Hs.279918.1	NOP16	NOP16 nucleolar protein	1.737	3.33341	0.001272
223096_at	g6841461	NOP58	NOP58 ribonucleoprotein	0.946	1.92652	0.045738
225514_at	Hs.288835.2	NOP9	NOP9 nucleolar protein	0.986	1.98069	0.039357
219773_at	g8393842	NOX4	NADPH oxidase 4	3.212	9.26634	0.020825
210672_s_at	g13278839	NPRL3	NPR3-like, GATOR1 complex subunit	0.98	1.97247	0.014278
213479_at	Hs.3281.0	NPTX2	neuronal pentraxin II	6.322	80.004	2e-06
210530_s_at	g338485	NR2C1	nuclear receptor subfamily 2, group C, member 1	0.722	1.64947	0.048302
209121_x_at	g179023	NR2F2	nuclear receptor subfamily 2, group F, member 2	1.677	3.19762	0.016
209119_x_at	Hs.288869.0	NR2F2	nuclear receptor subfamily 2, group F, member 2	1.466	2.76255	0.013273
242396_at	Hs.195069.1	NR2F2	nuclear receptor subfamily 2, group F, member 2	1.394	2.62806	0.03779
229092_at	Hs.91954.0	NR2F2	nuclear receptor subfamily 2, group F, member 2	1.345	2.5403	0.035422
215073_s_at	Hs.288869.1	NR2F2	nuclear receptor subfamily 2, group F, member 2	1.236	2.35545	0.017688
243189_at	Hs.202007.0	NRF1	nuclear respiratory factor 1	0.769	1.70409	0.048113
206343_s_at	g7669517	NRG1	neuregulin 1	3.171	9.00671	0.00023
227971_at	Hs.30643.0	NRK	Nik related kinase	1.553	2.93427	0.011864
210842_at	g11907929	NRP2	neuropilin 2	1.251	2.38006	0.045092
209279_s_at	g12652968	NSDHL	NAD(P) dependent steroid dehydrogenase-like	1.6	3.03143	0.001659
215093_at	Hs.57698.1	NSDHL	NAD(P) dependent steroid dehydrogenase-like	1.113	2.16295	0.003233
202395_at	g11079227	NSF	N-ethylmaleimide-sensitive factor	0.641	1.55941	0.026266
223236_at	g12053122	NSRP1	nuclear speckle splicing regulatory protein 1	0.641	1.55941	0.03055
223368_s_at	g12655090	NTMT1	N-terminal Xaa-Pro-Lys N-methyltransferase 1	0.893	1.85703	0.041064
225439_at	Hs.195870.0	NUDCD1	NudC domain containing 1	1.073	2.1038	0.011318
235384_at	Hs.203961.0	NUDT19	nudix hydrolase 19	0.681	1.60325	0.015141
223100_s_at	g12652566	NUDT5	nudix hydrolase 5	0.989	1.98481	0.014966
223381_at	g12667400	NUF2	NUF2, NDC80 kinetochore complex component	0.897	1.86219	0.033337
205134_s_at	Hs.120247.0	NUFIP1	nuclear fragile X mental retardation protein interacting protein 1	1.138	2.20076	0.020356
205135_s_at	Hs.120247.0	NUFIP1	nuclear fragile X mental retardation protein interacting protein 1	0.935	1.91189	0.004731
205136_s_at	g6912541	NUFIP1	nuclear fragile X mental retardation protein interacting protein 1	0.878	1.83783	0.04347
206550_s_at	g4758843	NUP155	nucleoporin 155kDa	0.826	1.77276	0.01636
212691_at	Hs.30002.3	NUP188	nucleoporin 188kDa	0.732	1.66094	0.007945
217601_at	Hs.288146.0	NUP188	nucleoporin 188kDa	0.68	1.60214	0.026359
202155_s_at	g4826873	NUP214	nucleoporin 214kDa	0.985	1.97931	0.0311
238474_at	Hs.152164.0	NUP43	nucleoporin 43kDa	0.998	1.99723	0.010073
219007_at	g13375888	NUP43	nucleoporin 43kDa	0.814	1.75808	0.007693
202153_s_at	g7705354	NUP62	nucleoporin 62kDa	0.887	1.84933	0.010602
203194_s_at	Hs.112255.0	NUP98	nucleoporin 98kDa	0.846	1.79751	0.005186
209230_s_at	g5732669	NUPR1	nuclear protein 1, transcriptional regulator	1.456	2.74347	0.002792
207877_s_at	g4505482	NVL	nuclear VCP-like	1.027	2.03778	0.042252
208274_at	g11693179	OCLM	oculomedin	0.874	1.83274	0.016673
53071_s_at	4873354_RC	OGFOD3	2-oxoglutarate and iron-dependent oxygenase domain containing 3	0.873	1.83147	0.010498
223601_at	g4406678	OLFM2	olfactomedin 2	1.672	3.18656	0.000321
213825_at	Hs.176977.0	OLIG2	oligodendrocyte lineage transcription factor 2	1.07	2.09943	0.007966
233446_at	Hs.287436.0	ONECUT2	one cut homeobox 2	0.698	1.62225	0.035412
243531_at	Hs.171333.0	ORAOV1	oral cancer overexpressed 1	0.949	1.93053	0.036429
205085_at	g4758849	ORC1	origin recognition complex subunit 1	1.37	2.58471	0.002702
204957_at	g4505524	ORC5	origin recognition complex subunit 5	0.769	1.70409	0.028784
228986_at	Hs.321129.0	OSBPL8	oxysterol binding protein-like 8	0.804	1.74594	0.031926
1554503_a_at	Hs2.347655.3	OSCAR	osteoclast associated, immunoglobulin-like receptor	1.121	2.17498	0.013604
202780_at	g4557816	OXCT1	3-oxoacid CoA-transferase 1	0.918	1.88949	0.018665
208676_s_at	g4099505	PA2G4	proliferation-associated 2G4	1.126	2.18253	0.001842
214794_at	Hs.5181.2	PA2G4	proliferation-associated 2G4	0.986	1.98069	0.016704
216422_at	Hs.287770.0	PA2G4P2	proliferation-associated 2G4 pseudogene 2	1.145	2.21146	0.001916
235517_at	Hs.240855.0	PACRGL	PARK2 co-regulated like	0.991	1.98756	0.013362
1554691_a_at	Hs2.18842.3	PACSIN2	protein kinase C and casein kinase substrate in neurons 2	0.822	1.76786	0.013002
201651_s_at	g6005825	PACSIN2	protein kinase C and casein kinase substrate in neurons 2	0.703	1.62789	0.03232
225626_at	Hs.266175.0	PAG1	phosphoprotein membrane anchor with glycosphingolipid microdomains 1	2.113	4.3259	0.011263
225622_at	Hs.266175.0	PAG1	phosphoprotein membrane anchor with glycosphingolipid microdomains 1	1.915	3.77114	0.014979
227354_at	Hs.13256.0	PAG1	phosphoprotein membrane anchor with glycosphingolipid microdomains 1	1.633	3.10157	0.042178
218886_at	g8923576	PAK1IP1	PAK1 interacting protein 1	1.261	2.39662	0.001633
1554640_at	Hs2.348946.2	PALM2	paralemmin 2	0.9	1.86607	0.037495
218969_at	g7705633	PAM16	presequence translocase-associated motor 16 homolog (S. cerevisiae)	1.062	2.08782	0.001369
228966_at	Hs.286212.2	PANK2	pantothenate kinase 2	1.159	2.23303	0.01914
1556929_at	Hs2.416807.1	PAPOLG	poly(A) polymerase gamma	0.639	1.55725	0.047866
1559400_s_at	Hs2.423154.1	PAPPA	pregnancy-associated plasma protein A, pappalysin 1	2.099	4.28412	0.001534
201981_at	Hs.75874.0	PAPPA	pregnancy-associated plasma protein A, pappalysin 1	1.933	3.81848	0.018665
224940_s_at	Hs.250655.4	PAPPA	pregnancy-associated plasma protein A, pappalysin 1	1.889	3.70378	0.0453
224942_at	Hs.250655.4	PAPPA	pregnancy-associated plasma protein A, pappalysin 1	1.813	3.51372	0.0255
228128_x_at	Hs.250655.5	PAPPA	pregnancy-associated plasma protein A, pappalysin 1	1.774	3.42001	0.044336
201982_s_at	g4505606	PAPPA	pregnancy-associated plasma protein A, pappalysin 1	1.525	2.87787	0.004142
232748_at	Hs.296754.0	PAPPA	pregnancy-associated plasma protein A, pappalysin 1	1.045	2.06337	0.025195
1558608_a_at	Hs2.29036.1	PAPPA	pregnancy-associated plasma protein A, pappalysin 1	0.735	1.6644	0.014684
208644_at	g190266	PARP1	poly(ADP-ribose) polymerase 1	0.908	1.87644	0.008018
222454_s_at	Hs.44077.0	PARVA	parvin, alpha	1.049	2.0691	0.002171
1563458_at	Hs2.376972.1	PARVA	parvin, alpha	0.722	1.64947	0.037039
214090_at	Hs.176090.1	PAWR	PRKC, apoptosis, WT1, regulator	0.666	1.58667	0.042071
214401_at	Hs.54567.0	PAX1	paired box 1	1.509	2.84613	0.002077
1556638_at	Hs2.376326.1	PAX7	paired box 7	1.123	2.17799	0.037001
219148_at	g8923876	PBK	PDZ binding kinase	1.672	3.18656	0.003192
204476_s_at	g11761614	PC	pyruvate carboxylase	0.847	1.79876	0.027248
238919_at	Hs.24886.0	PCDH9	protocadherin 9	1.626	3.08656	0.004234
219737_s_at	Hs.12450.0	PCDH9	protocadherin 9	1.58	2.9897	0.00555
1565602_at	Hs2.337565.1	PCDH9	protocadherin 9	0.938	1.91587	0.025648
223854_at	g4406582	PCDHB10	protocadherin beta 10	1.729	3.31498	0.003885
202465_at	g7262388	PCOLCE	procollagen C-endopeptidase enhancer	1.152	2.22222	0.012943
202290_at	g7657440	PDAP1	PDGFA associated protein 1	0.871	1.82893	0.015717
214826_at	Hs.307238.0	PDE12	phosphodiesterase 12	0.859	1.81378	0.029595
231839_at	Hs.151293.0	PDE12	phosphodiesterase 12	0.694	1.61776	0.025826
231065_at	Hs.129450.0	PDE6D	phosphodiesterase 6D, cGMP-specific, rod, delta	1.14	2.20381	0.004815
1552343_s_at	Hs2.406325.1	PDE7A	phosphodiesterase 7A	0.659	1.57899	0.044184
1554789_a_at	Hs2.78106.2	PDE8B	phosphodiesterase 8B	0.796	1.73628	0.029552
221994_at	Hs.154103.2	PDLIM5	PDZ and LIM domain 5	1.706	3.26255	0.001767
213684_s_at	Hs.154103.1	PDLIM5	PDZ and LIM domain 5	0.858	1.81252	0.029357
208233_at	g7019416	PDPN	podoplanin	1.624	3.08228	0.005999
204879_at	g5454097	PDPN	podoplanin	0.925	1.89868	0.047184
213984_at	Hs.31921.0	PDS5A	PDS5 cohesin associated factor A	1.39	2.62079	0.003344
215888_at	Hs.288786.0	PDS5B	PDS5 cohesin associated factor B	1.289	2.44359	0.020021
204742_s_at	g7657268	PDS5B	PDS5 cohesin associated factor B	0.7	1.6245	0.047959
220865_s_at	g11863164	PDSS1	prenyl (decaprenyl) diphosphate synthase, subunit 1	1.264	2.40161	0.015165
212915_at	Hs.177635.0	PDZRN3	PDZ domain containing ring finger 3	0.857	1.81127	0.015428
200787_s_at	g12803230	PEA15	phosphoprotein enriched in astrocytes 15	0.819	1.76418	0.01728
208518_s_at	g12707560	PER2	period circadian clock 2	1.212	2.31659	0.017148
205251_at	g12707561	PER2	period circadian clock 2	1.151	2.22068	0.034784
202212_at	g7657454	PES1	pescadillo ribosomal biogenesis factor 1	0.852	1.805	0.04001
1558915_a_at	Hs2.211939.1	PEX14	peroxisomal biogenesis factor 14	1.574	2.97729	0.003661
222029_x_at	Hs.205736.1	PFDN6	prefoldin subunit 6	0.813	1.75686	0.012679
233588_x_at	Hs.205736.3	PFDN6	prefoldin subunit 6	0.812	1.75564	0.018593
201037_at	g11321600	PFKP	phosphofructokinase, platelet	0.69	1.61328	0.023847
223738_s_at	g12052929	PGM2	phosphoglucomutase 2	0.948	1.9292	0.0158
225367_at	Hs.23363.1	PGM2	phosphoglucomutase 2	0.806	1.74836	0.010294
222622_at	Hs.13561.0	PGP	phosphoglycolate phosphatase	0.998	1.99723	0.017988
234405_s_at	Hs.267527.0	PHAX	phosphorylated adaptor for RNA export	1.004	2.00555	0.011934
235767_x_at	Hs.58595.0	PHAX	phosphorylated adaptor for RNA export	0.847	1.79876	0.007655
200658_s_at	Hs.75323.0	PHB	prohibitin	1.378	2.59908	0.018134
225309_at	Hs.273234.0	PHF5A	PHD finger protein 5A	1.03	2.04202	0.002171
229494_s_at	Hs.154036.1	PHLDA2	pleckstrin homology-like domain, family A, member 2	0.815	1.7593	0.014563
1554822_at	Hs2.128653.3	PHTF2	putative homeodomain transcription factor 2	1.456	2.74347	0.0255
1554780_a_at	Hs2.128653.2	PHTF2	putative homeodomain transcription factor 2	0.872	1.8302	0.025054
205078_at	g4505796	PIGF	phosphatidylinositol glycan anchor biosynthesis class F	0.88	1.84038	0.006411
1555394_at	Hs2Affx.1.261	PIGK	phosphatidylinositol glycan anchor biosynthesis class K	1.363	2.57219	0.001658
221689_s_at	g7798596	PIGP	phosphatidylinositol glycan anchor biosynthesis class P	0.987	1.98206	0.034535
212240_s_at	Hs.6241.0	PIK3R1	phosphoinositide-3-kinase, regulatory subunit 1 (alpha)	0.898	1.86348	0.010221
212239_at	Hs.6241.0	PIK3R1	phosphoinositide-3-kinase, regulatory subunit 1 (alpha)	0.861	1.8163	0.024185
213556_at	Hs.22049.0	PINLYP	phospholipase A2 inhibitor and LY6/PLAUR domain containing	1.9	3.73213	0.006084
223907_s_at	g10504237	PINX1	PIN2/TERF1 interacting, telomerase inhibitor 1	0.984	1.97794	0.002431
205570_at	g6857819	PIP4K2A	phosphatidylinositol-5-phosphate 4-kinase, type II, alpha	0.937	1.91454	0.005534
223124_s_at	g12006224	PITHD1	PITH (C-terminal proteasome-interacting domain of thioredoxin-like) domain containing 1	0.843	1.79378	0.013821
205273_s_at	g7662487	PITRM1	pitrilysin metallopeptidase 1	0.645	1.56374	0.015542
208502_s_at	g4505824	PITX1	paired-like homeodomain 1	0.804	1.74594	0.008816
204267_x_at	g4758927	PKMYT1	protein kinase, membrane associated tyrosine/threonine 1	0.921	1.89343	0.024077
215870_s_at	Hs.290.1	PLA2G5	phospholipase A2, group V	2.317	4.98295	0.00063
206178_at	g4505852	PLA2G5	phospholipase A2, group V	0.943	1.92252	0.007945
206214_at	g4826883	PLA2G7	phospholipase A2, group VII (platelet-activating factor acetylhydrolase, plasma)	1.33	2.51403	0.029467
227037_at	Hs.31652.0	PLD6	phospholipase D family, member 6	1.261	2.39662	0.00755
201373_at	g4505876	PLEC	plectin	0.997	1.99585	0.025236
204958_at	g4758015	PLK3	polo-like kinase 3	0.768	1.70291	0.01275
202185_at	g4505890	PLOD3	procollagen-lysine, 2-oxoglutarate 5-dioxygenase 3	0.894	1.85832	0.041499
209355_s_at	g2467299	PLPP3	phospholipid phosphatase 3	0.932	1.90792	0.047766
236044_at	Hs.40479.0	PLPP4	phospholipid phosphatase 4	2.1	4.28709	0.016692
202075_s_at	g5453913	PLTP	phospholipid transfer protein	1.264	2.40161	0.005363
227276_at	Hs.33033.0	PLXDC2	plexin domain containing 2	1.793	3.46535	0.015651
236297_at	Hs.126036.0	PLXDC2	plexin domain containing 2	1.666	3.17334	0.017506
238455_at	Hs.72639.0	PLXDC2	plexin domain containing 2	1.475	2.77984	0.012086
213030_s_at	Hs.300622.1	PLXNA2	plexin A2	0.986	1.98069	0.0468
232317_at	Hs.169129.0	PLXNA4	plexin A4	2.881	7.36661	0.0002
234859_at	Hs.272319.0	PLXNA4	plexin A4	1.779	3.43188	0.000519
1562240_at	Hs2.169129.1	PLXNA4	plexin A4	0.946	1.92652	0.012425
1554742_at	Hs2.111749.2	PMS1	PMS1 homolog 1, mismatch repair system component	1.156	2.22839	0.037729
1554743_x_at	Hs2.111749.2	PMS1	PMS1 homolog 1, mismatch repair system component	1.119	2.17196	0.02101
203515_s_at	g5729979	PMVK	phosphomevalonate kinase	0.736	1.66555	0.033702
235758_at	Hs.11849.0	PNMA6A	paraneoplastic Ma antigen family member 6A	1.296	2.45547	0.002561
218824_at	g8922662	PNMAL1	paraneoplastic Ma antigen family-like 1	0.803	1.74473	0.016807
242905_at	Hs.262858.0	PNO1	partner of NOB1 homolog	1.497	2.82255	0.009108
203622_s_at	g10047139	PNO1	partner of NOB1 homolog	1.259	2.3933	0.003177
222653_at	Hs.267963.0	PNPO	pyridoxamine 5'-phosphate oxidase	1.219	2.32785	0.004499
218511_s_at	g8922497	PNPO	pyridoxamine 5'-phosphate oxidase	0.901	1.86736	0.043975
225291_at	Hs.24170.0	PNPT1	polyribonucleotide nucleotidyltransferase 1	0.761	1.69466	0.007782
201578_at	g4885556	PODXL	podocalyxin-like	1.468	2.76638	0.005233
210433_at	g12653608	POFUT1	protein O-fucosyltransferase 1	0.977	1.96837	0.047324
204441_s_at	g4505928	POLA2	polymerase (DNA directed), alpha 2, accessory subunit	1.271	2.41329	0.021736
203422_at	g4505932	POLD1	polymerase (DNA directed), delta 1, catalytic subunit	0.97	1.95884	0.010482
239816_at	Hs.208062.0	POLD3	polymerase (DNA-directed), delta 3, accessory subunit	1.105	2.15099	0.014804
215357_s_at	Hs.278314.2	POLDIP3	polymerase (DNA-directed), delta interacting protein 3	0.783	1.72071	0.038078
212100_s_at	Hs.278314.1	POLDIP3	polymerase (DNA-directed), delta interacting protein 3	0.718	1.6449	0.027259
208828_at	g13278800	POLE3	polymerase (DNA directed), epsilon 3, accessory subunit	1.048	2.06766	0.013404
219510_at	g5729983	POLQ	polymerase (DNA directed), theta	0.943	1.92252	0.037187
222704_at	Hs.59475.0	POLR1A	polymerase (RNA) I polypeptide A	1.235	2.35381	0.046024
203664_s_at	g4758573	POLR2D	polymerase (RNA) II (DNA directed) polypeptide D	0.773	1.70882	0.013231
209511_at	g13097770	POLR2F	polymerase (RNA) II (DNA directed) polypeptide F	1.124	2.1795	0.00474
211730_s_at	g13543491	POLR2L	polymerase (RNA) II (DNA directed) polypeptide L, 7.6kDa	0.923	1.89605	0.011944
231763_at	Hs.249212.0	POLR3A	polymerase (RNA) III (DNA directed) polypeptide A, 155kDa	0.736	1.66555	0.033545
208361_s_at	g4502436	POLR3D	polymerase (RNA) III (DNA directed) polypeptide D, 44kDa	1.147	2.21453	0.003435
225682_s_at	Hs.300463.1	POLR3H	polymerase (RNA) III (DNA directed) polypeptide H (22.9kD)	1.29	2.44528	0.048344
232857_at	Hs.300463.2	POLR3H	polymerase (RNA) III (DNA directed) polypeptide H (22.9kD)	1.08	2.11404	0.002486
218866_s_at	g7706498	POLR3K	polymerase (RNA) III (DNA directed) polypeptide K, 12.3 kDa	1.064	2.09072	0.004277
210910_s_at	g12653432	POMZP3	POM121 and ZP3 fusion	1.279	2.42671	0.001262
213449_at	Hs.170114.0	POP1	POP1 homolog, ribonuclease P/MRP subunit	1.867	3.64773	0.01715
202868_s_at	g5729985	POP4	POP4 homolog, ribonuclease P/MRP subunit	0.774	1.71	0.024936
209482_at	g12655150	POP7	POP7 homolog, ribonuclease P/MRP subunit	1.087	2.12432	0.008995
207084_at	g5031982	POU3F2	POU class 3 homeobox 2	1.602	3.03564	0.003687
242455_at	Hs.175373.0	POU3F2	POU class 3 homeobox 2	1.452	2.73587	0.023946
221649_s_at	g12653526	PPAN	peter pan homolog (Drosophila)	1.076	2.10818	0.035504
242218_at	Hs.112708.0	PPARD	peroxisome proliferator-activated receptor delta	1.068	2.09652	0.027211
210636_at	g12803754	PPARD	peroxisome proliferator-activated receptor delta	0.757	1.68997	0.032933
1553639_a_at	Hs2.248652.1	PPARGC1B	peroxisome proliferator-activated receptor gamma, coactivator 1 beta	2.024	4.0671	0.007542
232181_at	Hs.159475.0	PPARGC1B	peroxisome proliferator-activated receptor gamma, coactivator 1 beta	1.528	2.88386	0.012789
1555282_a_at	Hs2.248652.2	PPARGC1B	peroxisome proliferator-activated receptor gamma, coactivator 1 beta	1.25	2.37841	0.027118
202494_at	g5174636	PPIE	peptidylprolyl isomerase E (cyclophilin E)	0.714	1.64035	0.010331
201602_s_at	Hs.16533.0	PPP1R12A	protein phosphatase 1, regulatory subunit 12A	0.986	1.98069	0.01973
201604_s_at	g4505316	PPP1R12A	protein phosphatase 1, regulatory subunit 12A	0.912	1.88165	0.010584
201603_at	Hs.16533.0	PPP1R12A	protein phosphatase 1, regulatory subunit 12A	0.68	1.60214	0.008397
1555444_a_at	Hs2.130760.5	PPP1R12B	protein phosphatase 1, regulatory subunit 12B	0.844	1.79502	0.045557
205478_at	g5803128	PPP1R1A	protein phosphatase 1, regulatory (inhibitor) subunit 1A	0.659	1.57899	0.021871
235502_at	Hs.79204.0	PPP2CA	protein phosphatase 2, catalytic subunit, alpha isozyme	1.029	2.04061	0.034794
202313_at	g4506018	PPP2R2A	protein phosphatase 2, regulatory subunit B, alpha	0.8	1.7411	0.011109
203737_s_at	g13124753	PPRC1	peroxisome proliferator-activated receptor gamma, coactivator-related 1	1.17	2.25012	0.024746
223312_at	g13477208	PRADC1	protease-associated domain containing 1	1.458	2.74727	0.003995
218009_s_at	g4506038	PRC1	protein regulator of cytokinesis 1	0.837	1.78633	0.011369
208938_at	g13436211	PRCC	papillary renal cell carcinoma (translocation-associated)	0.663	1.58337	0.019252
232424_at	Hs.302022.1	PRDM16	PR domain containing 16	1.296	2.45547	0.047544
224232_s_at	g6563193	PRELID1	PRELI domain containing 1	0.835	1.78386	0.021497
229644_at	Hs.111670.0	PREP	prolyl endopeptidase	1.044	2.06194	0.013922
228692_at	Hs.169943.0	PREX2	phosphatidylinositol-3,4,5-trisphosphate-dependent Rac exchange factor 2	1.76	3.38698	0.004637
236459_at	Hs.179991.0	PRKCE	protein kinase C, epsilon	1.233	2.35055	0.022775
215757_at	Hs.287514.0	PRKDC	protein kinase, DNA-activated, catalytic polypeptide	0.777	1.71356	0.026333
206445_s_at	g4504496	PRMT1	protein arginine methyltransferase 1	0.733	1.66209	0.018775
207477_at	Hs.283046.0	PRO2958	uncharacterized LOC100128329	0.808	1.75078	0.042963
209384_at	Hs.301959.0	PROSC	proline synthetase co-transcribed homolog (bacterial)	1.281	2.43007	0.006475
216519_s_at	Hs.301959.3	PROSC	proline synthetase co-transcribed homolog (bacterial)	1.112	2.16145	0.013355
227315_x_at	Hs.301959.1	PROSC	proline synthetase co-transcribed homolog (bacterial)	1.092	2.13169	0.007556
214545_s_at	Hs.301959.2	PROSC	proline synthetase co-transcribed homolog (bacterial)	1.017	2.02371	0.016278
209385_s_at	g12052757	PROSC	proline synthetase co-transcribed homolog (bacterial)	0.957	1.94127	0.04718
229801_at	Hs.87614.0	PROSER2	proline and serine rich 2	0.712	1.63807	0.02593
221547_at	g12653992	PRPF18	pre-mRNA processing factor 18	0.758	1.69114	0.036952
221546_at	Hs.155244.0	PRPF18	pre-mRNA processing factor 18	0.648	1.56699	0.036691
203103_s_at	g7657380	PRPF19	pre-mRNA processing factor 19	0.807	1.74957	0.029079
202408_s_at	g7661653	PRPF31	pre-mRNA processing factor 31	0.836	1.78509	0.00234
1553709_a_at	Hs2.5301.2	PRPF38A	pre-mRNA processing factor 38A	0.754	1.68646	0.010319
209161_at	Hs.8551.0	PRPF4	pre-mRNA processing factor 4	0.787	1.72548	0.010828
213729_at	Hs.119325.0	PRPF40A	PRP40 pre-mRNA processing factor 40 homolog A	0.641	1.55941	0.042611
208447_s_at	g4506126	PRPS1	phosphoribosyl pyrophosphate synthetase 1	0.883	1.84421	0.030175
209440_at	g12804406	PRPS1	phosphoribosyl pyrophosphate synthetase 1	0.85	1.8025	0.004506
228273_at	Hs.165909.0	PRR11	proline rich 11	0.74	1.67018	0.019266
220014_at	g7706193	PRR16	proline rich 16	2.24	4.72397	0.002353
1554867_a_at	Hs2.157461.2	PRR16	proline rich 16	1.383	2.6081	0.033991
233379_at	Hs.306835.0	PRR5L	proline rich 5 like	1.257	2.38998	0.004514
237732_at	Hs.135098.0	PRR9	proline rich 9	2.783	6.88282	0.003513
211944_at	Hs.69559.2	PRRC2C	proline-rich coiled-coil 2C	0.889	1.85189	0.025826
214052_x_at	Hs.69559.0	PRRC2C	proline-rich coiled-coil 2C	0.885	1.84676	0.036814
211948_x_at	Hs.69559.2	PRRC2C	proline-rich coiled-coil 2C	0.738	1.66786	0.046618
238852_at	Hs.283549.0	PRRX1	paired related homeobox 1	2.651	6.28102	0.006768
226695_at	Hs.9071.2	PRRX1	paired related homeobox 1	1.803	3.48945	0.000393
205991_s_at	g12707578	PRRX1	paired related homeobox 1	1.53	2.88786	0.000382
219729_at	g12707581	PRRX2	paired related homeobox 2	1.106	2.15248	0.042151
1565677_at	Hs2.147138.1	PRSS23	protease, serine, 23	0.931	1.9066	0.042092
201400_at	g4506196	PSMB3	proteasome subunit beta 3	0.965	1.95206	0.016143
201267_s_at	Hs.250758.0	PSMC3	proteasome 26S subunit, ATPase 3	1.138	2.20076	0.007808
213951_s_at	Hs.78185.3	PSMC3IP	PSMC3 interacting protein	0.653	1.57243	0.008796
201252_at	g5729990	PSMC4	proteasome 26S subunit, ATPase 4	0.693	1.61664	0.005678
201198_s_at	Hs.3887.0	PSMD1	proteasome 26S subunit, non-ATPase 1	0.73	1.65864	0.022399
201199_s_at	g4506224	PSMD1	proteasome 26S subunit, non-ATPase 1	0.639	1.55725	0.019499
202352_s_at	Hs.4295.0	PSMD12	proteasome 26S subunit, non-ATPase 12	0.689	1.61217	0.012678
201388_at	g4506228	PSMD3	proteasome 26S subunit, non-ATPase 3	0.911	1.88035	0.009146
200988_s_at	g5031996	PSME3	proteasome activator subunit 3	1.068	2.09652	0.006327
200987_x_at	Hs.152978.0	PSME3	proteasome activator subunit 3	0.906	1.87384	0.005337
209852_x_at	g12655138	PSME3	proteasome activator subunit 3	0.863	1.81882	0.023271
209853_s_at	g12803696	PSME3	proteasome activator subunit 3	0.84	1.79005	0.006618
218467_at	g9910421	PSMG2	proteasome (prosome, macropain) assembly chaperone 2	0.837	1.78633	0.013583
228217_s_at	Hs.284298.0	PSMG4	proteasome (prosome, macropain) assembly chaperone 4	1.038	2.05338	0.003192
243997_x_at	Hs.213198.0	PSPC1	paraspeckle component 1	1.018	2.02511	0.004017
226724_s_at	Hs.16364.2	PSPC1	paraspeckle component 1	0.742	1.67249	0.019753
222612_at	Hs.16364.0	PSPC1	paraspeckle component 1	0.726	1.65405	0.019468
219938_s_at	g13270468	PSTPIP2	proline-serine-threonine phosphatase interacting protein 2	1.497	2.82255	0.002615
212016_s_at	Hs.172550.3	PTBP1	polypyrimidine tract binding protein 1	0.646	1.56482	0.016955
210367_s_at	g2415307	PTGES	prostaglandin E synthase	1.579	2.98763	0.000623
228825_at	Hs.114670.0	PTGR1	prostaglandin reductase 1	0.812	1.75564	0.047184
215813_s_at	Hs.88474.1	PTGS1	prostaglandin-endoperoxide synthase 1 (prostaglandin G/H synthase and cyclooxygenase)	0.685	1.6077	0.028604
211756_at	g13543620	PTHLH	parathyroid hormone-like hormone	3.48	11.1579	0.002488
206300_s_at	g4506268	PTHLH	parathyroid hormone-like hormone	3.267	9.62642	0.00256
210355_at	g190705	PTHLH	parathyroid hormone-like hormone	2.606	6.08813	0.000792
1559529_at	Hs2.436335.1	PTK2	protein tyrosine kinase 2	0.68	1.60214	0.043963
1555324_at	Hs2Affx.1.195	PTK7	protein tyrosine kinase 7 (inactive)	1.7	3.24901	0.035474
244533_at	Hs.294079.0	PTPN14	protein tyrosine phosphatase, non-receptor type 14	1.395	2.62989	0.004021
242321_at	Hs.193557.0	PTPN14	protein tyrosine phosphatase, non-receptor type 14	1.37	2.58471	0.000832
205503_at	g4885566	PTPN14	protein tyrosine phosphatase, non-receptor type 14	1.17	2.25012	0.003135
226282_at	Hs.235857.0	PTPN14	protein tyrosine phosphatase, non-receptor type 14	1.09	2.12874	0.005169
204935_at	g4506290	PTPN2	protein tyrosine phosphatase, non-receptor type 2	0.981	1.97383	0.018014
215066_at	Hs.287592.0	PTPRF	protein tyrosine phosphatase, receptor type, F	2.126	4.36506	0.00083
1569323_at	Hs2.368849.1	PTPRG	protein tyrosine phosphatase, receptor type, G	1.807	3.49914	0.024102
204469_at	g4506328	PTPRZ1	protein tyrosine phosphatase, receptor-type, Z polypeptide 1	1.837	3.57266	0.01963
208790_s_at	g11034808	PTRF	polymerase I and transcript release factor	1.463	2.75681	0.013538
1557938_s_at	Hs2.406061.1	PTRF	polymerase I and transcript release factor	1.415	2.6666	0.01064
208789_at	Hs.29759.0	PTRF	polymerase I and transcript release factor	1.288	2.44189	0.015755
208511_at	g10337606	PTTG3P	pituitary tumor-transforming 3, pseudogene	1.178	2.26263	0.046704
209899_s_at	g6740005	PUF60	poly-U binding splicing factor 60KDa	0.812	1.75564	0.007778
203712_at	g7661865	PUM3	pumilio RNA binding family member 3	0.726	1.65405	0.032366
213806_at	Hs.29117.1	PURA	purine-rich element binding protein A	0.695	1.61888	0.032804
228733_at	Hs.6449.2	PUSL1	pseudouridylate synthase-like 1	0.908	1.87644	0.008135
214443_at	Hs.321018.0	PVR	poliovirus receptor	0.694	1.61776	0.040178
1558290_a_at	Hs2.8854.2	PVT1	Pvt1 oncogene (non-protein coding)	0.651	1.57026	0.037786
226720_at	Hs.18672.0	PWWP2A	PWWP domain containing 2A	1.067	2.09507	0.003064
231715_s_at	Hs.274287.1	PYCR2	pyrroline-5-carboxylate reductase family, member 2	1.11	2.15846	0.007848
218944_at	g12751492	PYCRL	pyrroline-5-carboxylate reductase-like	1.028	2.0392	0.007449
201481_s_at	g4506350	PYGB	phosphorylase, glycogen; brain	0.764	1.69819	0.026688
219802_at	g13376278	PYROXD1	pyridine nucleotide-disulphide oxidoreductase domain 1	0.639	1.55725	0.021459
242414_at	Hs.148324.0	QPRT	quinolinate phosphoribosyltransferase	3.473	11.1039	0.000665
1564129_a_at	Hs2.274858.1	QPRT	quinolinate phosphoribosyltransferase	1.718	3.2898	0.010661
221270_s_at	g13654275	QTRT1	queuine tRNA-ribosyltransferase 1	0.803	1.74473	0.023055
212866_at	Hs.300861.0	R3HCC1	R3H domain and coiled-coil containing 1	0.778	1.71475	0.018815
35156_at	4870467_RC	R3HCC1	R3H domain and coiled-coil containing 1	0.749	1.68063	0.018408
208734_x_at	g550061	RAB2A	RAB2A, member RAS oncogene family	0.787	1.72548	0.028588
243851_at	Hs.134287.0	RAB3GAP2	RAB3 GTPase activating protein subunit 2 (non-catalytic)	0.911	1.88035	0.013765
1558021_at	Hs2.391586.1	RABEPK	Rab9 effector protein with kelch motifs	1.272	2.41496	0.011169
203150_at	g5032014	RABEPK	Rab9 effector protein with kelch motifs	0.791	1.73027	0.032346
224200_s_at	g8980616	RAD18	RAD18 E3 ubiquitin protein ligase	1.21	2.31338	0.008334
223417_at	g8895211	RAD18	RAD18 E3 ubiquitin protein ligase	1.185	2.27363	0.007307
219494_at	g6912621	RAD54B	RAD54 homolog B (S. cerevisiae)	1.248	2.37512	0.011293
204916_at	g5032018	RAMP1	receptor (G protein-coupled) activity modifying protein 1	0.702	1.62676	0.031476
244198_at	Hs.156147.0	RANBP17	RAN binding protein 17	1.487	2.80305	0.015542
212127_at	Hs.183800.0	RANGAP1	Ran GTPase activating protein 1	0.878	1.83783	0.033145
212125_at	Hs.183800.0	RANGAP1	Ran GTPase activating protein 1	0.64	1.55833	0.009752
1553535_a_at	Hs2.183800.1	RANGAP1	Ran GTPase activating protein 1	0.638	1.55617	0.031849
201330_at	g4506428	RARS	arginyl-tRNA synthetase	0.699	1.62338	0.01217
222810_s_at	Hs.227806.0	RASAL2	RAS protein activator like 2	0.889	1.85189	0.046904
219142_at	g13027611	RASL11B	RAS-like, family 11, member B	1.027	2.03778	0.012261
243001_at	Hs.197690.0	RBFA	ribosome binding factor A (putative)	1.183	2.27048	0.002435
1555003_at	Hs2.87.2	RBL1	retinoblastoma-like 1	0.987	1.98206	0.048382
217221_x_at	Hs.154583.2	RBM10	RNA binding motif protein 10	0.65	1.56917	0.012408
238122_at	Hs.130143.0	RBM12B	RNA binding motif protein 12B	0.645	1.56374	0.047866
204178_s_at	g5454063	RBM14	RNA binding motif protein 14	1.515	2.85799	0.006875
1555639_a_at	Hs2.11170.3	RBM14	RNA binding motif protein 14	0.868	1.82513	0.019687
225751_at	Hs.107001.1	RBM17	RNA binding motif protein 17	0.886	1.84805	0.002486
224781_s_at	Hs.107001.0	RBM17	RNA binding motif protein 17	0.729	1.65749	0.009044
235004_at	Hs.201619.0	RBM24	RNA binding motif protein 24	0.898	1.86348	0.015093
215751_at	Hs.306602.0	RBM26	RNA binding motif protein 26	0.931	1.9066	0.023737
229433_at	Hs.288941.0	RBM26	RNA binding motif protein 26	0.823	1.76908	0.005583
243295_at	Hs.183412.0	RBM27	RNA binding motif protein 27	0.679	1.60103	0.010584
218593_at	g8922387	RBM28	RNA binding motif protein 28	1.768	3.40581	0.000959
1554095_at	Hs2.29796.2	RBM33	RNA binding motif protein 33	0.811	1.75443	0.023113
214942_at	Hs.322478.0	RBM34	RNA binding motif protein 34	1.362	2.57041	0.032753
1557223_at	Hs2.350657.1	RBPMS	RNA binding protein with multiple splicing	1.109	2.15696	0.037325
209487_at	g1669550	RBPMS	RNA binding protein with multiple splicing	0.922	1.89474	0.014144
218117_at	g7657507	RBX1	ring-box 1, E3 ubiquitin protein ligase	0.893	1.85703	0.014227
220201_at	g9256536	RC3H2	ring finger and CCCH-type domains 2	1.128	2.18556	0.035965
230133_at	Hs.112227.1	RC3H2	ring finger and CCCH-type domains 2	0.971	1.9602	0.00688
215253_s_at	Hs.250724.0	RCAN1	regulator of calcineurin 1	0.94	1.91853	0.017518
208370_s_at	g7657042	RCAN1	regulator of calcineurin 1	0.927	1.90132	0.005876
206499_s_at	g4502800	RCC1	regulator of chromosome condensation 1	0.737	1.66671	0.009627
225467_s_at	Hs.178617.0	RDH13	retinol dehydrogenase 13 (all-trans/9-cis)	0.795	1.73508	0.026585
1553015_a_at	Hs2.31442.1	RECQL4	RecQ helicase-like 4	1.165	2.24233	0.02517
218777_at	g13376835	REEP4	receptor accessory protein 4	1.089	2.12727	0.012961
1557349_at	Hs2.380090.1	RERE	arginine-glutamic acid dipeptide (RE) repeats	1.205	2.30537	0.006547
204127_at	g12803002	RFC3	replication factor C subunit 3	0.898	1.86348	0.032806
231119_at	Hs.111458.0	RFC3	replication factor C subunit 3	0.875	1.83401	0.019666
204128_s_at	g4506488	RFC3	replication factor C subunit 3	0.801	1.74231	0.045961
232785_at	Hs.201071.0	RGAG1	retrotransposon gag domain containing 1	0.906	1.87384	0.026209
210138_at	g3523159	RGS20	regulator of G-protein signaling 20	0.898	1.86348	0.008211
204337_at	Hs.227571.0	RGS4	regulator of G-protein signaling 4	3.409	10.6221	0.004068
204338_s_at	g11184227	RGS4	regulator of G-protein signaling 4	2.316	4.9795	0.000712
204339_s_at	g12653888	RGS4	regulator of G-protein signaling 4	1.14	2.20381	0.019719
1558785_a_at	Hs2.123176.1	RGS5	regulator of G-protein signaling 5	0.708	1.63354	0.03271
224450_s_at	g13543921	RIOK1	RIO kinase 1	1.29	2.44528	0.003462
218535_s_at	g8922904	RIOK2	RIO kinase 2	1.214	2.3198	0.000751
213297_at	Hs.23990.1	RMND5B	required for meiotic nuclear division 5 homolog B	1.047	2.06623	0.023847
218497_s_at	g4506554	RNASEH1	ribonuclease H1	0.764	1.69819	0.005393
203022_at	g5454009	RNASEH2A	ribonuclease H2, subunit A	0.904	1.87125	0.011723
215040_at	Hs.306291.0	RNASEH2B	ribonuclease H2, subunit B	1.225	2.33755	0.022492
226453_at	Hs.6364.3	RNASEH2C	ribonuclease H2, subunit C	0.972	1.96156	0.002488
209565_at	g12654052	RNF113A	ring finger protein 113A	0.696	1.62001	0.028156
217865_at	g10092650	RNF130	ring finger protein 130	0.91	1.87905	0.040148
1553722_s_at	Hs2.243623.1	RNF152	ring finger protein 152	2.026	4.07274	0.004046
219303_at	g13375708	RNF219	ring finger protein 219	0.984	1.97794	0.022563
237686_at	Hs.197659.0	RNF219	ring finger protein 219	0.848	1.8	0.008591
206845_s_at	g7662229	RNF40	ring finger protein 40, E3 ubiquitin protein ligase	0.692	1.61552	0.019035
203403_s_at	g5174652	RNF6	ring finger protein (C3H2C3 type) 6	0.645	1.56374	0.023032
204208_at	g4506562	RNGTT	RNA guanylyltransferase and 5'-phosphatase	0.7	1.6245	0.046266
207939_x_at	g6857825	RNPS1	RNA binding protein S1, serine-rich domain	0.66	1.58008	0.021988
227849_at	Hs.292057.3	RP9	retinitis pigmentosa 9 (autosomal dominant)	0.694	1.61776	0.043921
227852_at	Hs.292057.3	RP9	retinitis pigmentosa 9 (autosomal dominant)	0.687	1.60993	0.025633
225866_at	Hs.10600.0	RPF2	ribosome production factor 2 homolog	0.657	1.5768	0.010369
214976_at	Hs.306856.0	RPL13	ribosomal protein L13	0.941	1.91986	0.023708
218830_at	g7705812	RPL26L1	ribosomal protein L26-like 1	1.067	2.09507	0.001789
221593_s_at	g12804504	RPL31	ribosomal protein L31	0.766	1.70055	0.036006
205562_at	g5454025	RPP38	ribonuclease P/MRP 38kDa subunit	0.671	1.59218	0.016278
213427_at	Hs.115823.0	RPP40	ribonuclease P/MRP 40kDa subunit	1.612	3.05675	0.001338
228566_at	Hs.47044.0	RPRD1A	regulation of nuclear pre-mRNA domain containing 1A	0.775	1.71119	0.027228
225148_at	Hs.81915.1	RPS19BP1	ribosomal protein S19 binding protein 1	1.003	2.00416	0.00573
1554080_at	Hs2.432483.2	RQCD1	RCD1 required for cell differentiation1 homolog (S. pombe)	0.835	1.78386	0.008177
212590_at	Hs.206097.0	RRAS2	related RAS viral (r-ras) oncogene homolog 2	0.76	1.69349	0.022489
212589_at	Hs.206097.0	RRAS2	related RAS viral (r-ras) oncogene homolog 2	0.69	1.61328	0.013604
201476_s_at	Hs.2934.0	RRM1	ribonucleotide reductase M1	0.831	1.77892	0.047601
243124_at	Hs.212925.0	RRN3P2	RRN3 homolog, RNA polymerase I transcription factor pseudogene 2	1.038	2.05338	0.017976
238413_at	Hs.142569.0	RRN3P3	RRN3 homolog, RNA polymerase I transcription factor pseudogene 3	1.466	2.76255	0.039501
216913_s_at	Hs.60103.2	RRP12	ribosomal RNA processing 12 homolog	1.04	2.05623	0.048454
216909_at	Hs.60103.2	RRP12	ribosomal RNA processing 12 homolog	0.952	1.93455	0.01068
219037_at	g7705619	RRP15	ribosomal RNA processing 15 homolog	1.576	2.98142	0.005108
235223_at	Hs.203186.0	RRP36	ribosomal RNA processing 36	0.671	1.59218	0.047262
33307_at	4866540_RC	RRP7A	ribosomal RNA processing 7 homolog A	1.904	3.74249	0.000866
202937_x_at	Hs.239934.0	RRP7A	ribosomal RNA processing 7 homolog A	1.653	3.14487	0.001262
203171_s_at	g12758124	RRP8	ribosomal RNA processing 8, methyltransferase, homolog (yeast)	0.902	1.86865	0.002488
204133_at	g4759275	RRP9	ribosomal RNA processing 9, small subunit (SSU) processome component, homolog (yeast)	0.946	1.92652	0.005363
209567_at	g12804750	RRS1	ribosome biogenesis regulator homolog	1.42	2.67586	0.027618
232221_x_at	Hs.72451.0	RSBN1L	round spermatid basic protein 1-like	0.646	1.56482	0.018134
212018_s_at	Hs.85963.0	RSL1D1	ribosomal L1 domain containing 1	0.869	1.8264	0.010559
1554012_at	Hs2.209569.1	RSPO2	R-spondin 2	1.721	3.29665	0.003686
1560937_at	Hs2.60466.1	RSU1	Ras suppressor protein 1	1.4	2.63902	0.005393
201980_s_at	g10800408	RSU1	Ras suppressor protein 1	0.727	1.65519	0.035873
227072_at	Hs.31931.0	RTTN	rotatin	0.896	1.8609	0.011949
1557388_at	Hs2.375755.1	RTTN	rotatin	0.672	1.59328	0.035795
228827_at	Hs.90858.0	RUNX1T1	runt-related transcription factor 1; translocated to, 1 (cyclin D-related)	1.117	2.16895	0.030591
205528_s_at	Hs.31551.0	RUNX1T1	runt-related transcription factor 1; translocated to, 1 (cyclin D-related)	0.94	1.91853	0.030603
216832_at	Hs.307345.0	RUNX1T1	runt-related transcription factor 1; translocated to, 1 (cyclin D-related)	0.904	1.87125	0.011418
201459_at	g5730022	RUVBL2	RuvB-like AAA ATPase 2	0.798	1.73869	0.014978
1559946_s_at	Hs2.403943.1	RUVBL2	RuvB-like AAA ATPase 2	0.767	1.70173	0.013125
203186_s_at	g9845514	S100A4	S100 calcium binding protein A4	2.148	4.43213	0.000176
228176_at	Hs.55902.0	S1PR3	sphingosine-1-phosphate receptor 3	1.571	2.97111	0.044647
1555618_s_at	Hs2.279868.2	SAE1	SUMO1 activating enzyme subunit 1	0.951	1.93321	0.019095
232847_at	Hs.172597.0	SALL3	spalt-like transcription factor 3	5.37	41.3553	4e-06
1553411_s_at	Hs2.432482.1	SALL3	spalt-like transcription factor 3	5.135	35.139	2e-06
230785_at	Hs.23210.0	SALL3	spalt-like transcription factor 3	4.943	30.7603	7e-06
243672_at	Hs.278558.0	SALL3	spalt-like transcription factor 3	4.782	27.5122	1.3e-05
200069_at	Hs.116875.0	SART3	squamous cell carcinoma antigen recognized by T-cells 3	0.703	1.62789	0.029173
215591_at	Hs.287668.0	SATB2	SATB homeobox 2	0.959	1.94396	0.020825
235272_at	Hs.135188.0	SBSN	suprabasin	1.94	3.83706	0.001317
235579_at	Hs.179945.0	SCAF11	SR-related CTD-associated factor 11	1.231	2.3473	0.010953
222310_at	Hs.291979.0	SCAF4	SR-related CTD-associated factor 4	0.969	1.95748	0.017304
222311_s_at	Hs.291979.0	SCAF4	SR-related CTD-associated factor 4	0.7	1.6245	0.03055
201771_at	g5032076	SCAMP3	secretory carrier membrane protein 3	0.982	1.9752	0.016587
219416_at	g7705335	SCARA3	scavenger receptor class A, member 3	0.932	1.90792	0.019594
223842_s_at	g6230378	SCARA3	scavenger receptor class A, member 3	0.831	1.77892	0.038267
229839_at	Hs.49696.0	SCARA5	scavenger receptor class A, member 5	1.07	2.09943	0.01794
1552256_a_at	Hs2.180616.1	SCARB1	scavenger receptor class B, member 1	0.997	1.99585	0.033694
226923_at	Hs.48565.0	SCFD2	sec1 family domain containing 2	0.779	1.71594	0.022196
1569190_at	Hs2.397168.1	SCLT1	sodium channel and clathrin linker 1	0.936	1.91322	0.03602
201287_s_at	g4506858	SDC1	syndecan 1	1.774	3.42001	0.015755
201286_at	Hs.82109.0	SDC1	syndecan 1	1.115	2.16595	0.043227
212157_at	Hs.1501.0	SDC2	syndecan 2	1.319	2.49493	0.032697
243772_at	Hs.178100.0	SDCCAG8	serologically defined colon cancer antigen 8	1.092	2.13169	0.015347
218681_s_at	g11545742	SDF2L1	stromal cell-derived factor 2-like 1	0.776	1.71238	0.017771
221972_s_at	Hs.42806.1	SDF4	stromal cell derived factor 4	0.922	1.89474	0.029115
224472_x_at	g13623226	SDF4	stromal cell derived factor 4	0.737	1.66671	0.046961
223048_at	g12803060	SDHAF2	succinate dehydrogenase complex assembly factor 2	0.778	1.71475	0.042963
202083_s_at	Hs.75232.0	SEC14L1	SEC14-like lipid binding 1	1.375	2.59368	0.00314
223225_s_at	Hs.301048.0	SEH1L	SEH1-like nucleoporin	0.932	1.90792	0.006157
210083_at	g3930578	SEMA7A	semaphorin 7A, GPI membrane anchor (John Milton Hagen blood group)	1.052	2.0734	0.012217
230345_at	Hs.170843.0	SEMA7A	semaphorin 7A, GPI membrane anchor (John Milton Hagen blood group)	0.992	1.98894	0.03181
215114_at	Hs.118926.1	SENP3	SUMO1/sentrin/SMT3 specific peptidase 3	1.044	2.06194	0.031479
208941_s_at	g12654242	SEPHS1	selenophosphate synthetase 1	0.755	1.68763	0.020672
212415_at	Hs.90998.0	SEPT6	septin 6	1.135	2.19619	0.014566
41220_at	4887497	SEPT9	septin 9	0.837	1.78633	0.0253
224762_at	Hs.8254.1	SERINC2	serine incorporator 2	2.118	4.34092	0.001846
220489_s_at	g8923988	SERINC2	serine incorporator 2	1.956	3.87985	0.001471
204614_at	g4505594	SERPINB2	serpin peptidase inhibitor, clade B (ovalbumin), member 2	3.798	13.9095	0.025236
206421_s_at	g4505148	SERPINB7	serpin peptidase inhibitor, clade B (ovalbumin), member 7	3.157	8.91973	0.02542
202627_s_at	Hs.82085.0	SERPINE1	serpin peptidase inhibitor, clade E (nexin, plasminogen activator inhibitor type 1), member 1	2.34	5.06303	0.000183
1568765_at	Hs2.400429.1	SERPINE1	serpin peptidase inhibitor, clade E (nexin, plasminogen activator inhibitor type 1), member 1	1.731	3.31958	0.016219
202628_s_at	g10835158	SERPINE1	serpin peptidase inhibitor, clade E (nexin, plasminogen activator inhibitor type 1), member 1	1.247	2.37347	0.019095
202283_at	g4505708	SERPINF1	serpin peptidase inhibitor, clade F (alpha-2 antiplasmin, pigment epithelium derived factor), member 1	2.282	4.86352	0.00164
233907_s_at	Hs.21068.3	SERTAD4	SERTA domain containing 4	1.335	2.52275	0.019832
37462_i_at	4850895	SF3A2	splicing factor 3a subunit 2	0.988	1.98343	0.012678
203818_s_at	g5803166	SF3A3	splicing factor 3a subunit 3	0.708	1.63354	0.019832
228413_s_at	Hs.7306.1	SFRP1	secreted frizzled-related protein 1	2.492	5.62557	0.00049
202035_s_at	Hs.7306.0	SFRP1	secreted frizzled-related protein 1	2.452	5.47174	0.000393
202037_s_at	g8400731	SFRP1	secreted frizzled-related protein 1	1.983	3.95314	0.000303
202036_s_at	g2415416	SFRP1	secreted frizzled-related protein 1	1.656	3.15142	0.000725
214838_at	Hs.119254.0	SFT2D2	SFT2 domain containing 2	0.966	1.95342	0.049427
227560_at	Hs.44070.0	SFXN2	sideroflexin 2	0.93	1.90528	0.021405
229236_s_at	Hs.19954.0	SFXN4	sideroflexin 4	1.061	2.08638	0.009782
214492_at	Hs.151899.1	SGCD	sarcoglycan delta	1.464	2.75872	0.038651
48117_at	4861894	SGF29	SAGA complex associated factor 29	1.114	2.16445	0.003113
221822_at	Hs.110407.0	SGF29	SAGA complex associated factor 29	0.843	1.79378	0.005596
235085_at	Hs.29068.0	SGK223	homolog of rat pragma of Rnd2	1.449	2.73019	0.001414
242963_at	Hs.129379.0	SGMS2	sphingomyelin synthase 2	2.058	4.16409	0.027182
219749_at	g11545782	SH2D4A	SH2 domain containing 4A	1.044	2.06194	0.018825
222258_s_at	Hs.17667.1	SH3BP4	SH3-domain binding protein 4	0.829	1.77645	0.047717
240966_at	Hs.44567.0	SH3TC2	SH3 domain and tetratricopeptide repeats 2	1.286	2.43851	0.041213
214853_s_at	Hs.81972.1	SHC1	SHC (Src homology 2 domain containing) transforming protein 1	1.245	2.37019	0.019395
201469_s_at	Hs.81972.0	SHC1	SHC (Src homology 2 domain containing) transforming protein 1	1.003	2.00416	0.010767
219493_at	g13376069	SHCBP1	SHC SH2-domain binding protein 1	1.063	2.08927	0.031018
230493_at	Hs.128899.0	SHISA2	shisa family member 2	1.868	3.65026	0.000542
229978_at	Hs.130661.0	SHISA9	shisa family member 9	1.863	3.63763	0.031
219713_at	g7019340	SHPK	sedoheptulokinase	0.672	1.59328	0.010709
202896_s_at	g4758977	SIRPA	signal-regulatory protein alpha	1.012	2.0167	0.028351
1554624_a_at	Hs2.194784.2	SIRPB1	signal-regulatory protein beta 1	2.229	4.68809	0.004632
227165_at	Hs.88523.0	SKA3	spindle and kinetochore associated complex subunit 3	1.23	2.34567	0.015839
203625_x_at	Hs.23348.0	SKP2	S-phase kinase-associated protein 2, E3 ubiquitin protein ligase	0.699	1.62338	0.021309
204928_s_at	g10938005	SLC10A3	solute carrier family 10, member 3	0.917	1.88818	0.045943
223995_at	g13111796	SLC12A9	solute carrier family 12, member 9	1.44	2.71321	0.039151
230687_at	Hs.102867.1	SLC13A3	solute carrier family 13 (sodium-dependent dicarboxylate transporter), member 3	0.828	1.77522	0.020928
204462_s_at	g5730044	SLC16A2	solute carrier family 16, member 2 (thyroid hormone transporter)	1.543	2.914	0.03522
241866_at	Hs.170504.0	SLC16A7	solute carrier family 16 (monocarboxylate transporter), member 7	1.526	2.87986	0.003835
207057_at	g4759119	SLC16A7	solute carrier family 16 (monocarboxylate transporter), member 7	1.145	2.21146	0.006272
210807_s_at	g3834394	SLC16A7	solute carrier family 16 (monocarboxylate transporter), member 7	1.047	2.06623	0.014227
209776_s_at	g1222522	SLC19A1	solute carrier family 19 (folate transporter), member 1	0.924	1.89737	0.019832
204981_at	g4505526	SLC22A18	solute carrier family 22, member 18	1.178	2.26263	0.015176
205896_at	g4507002	SLC22A4	solute carrier family 22 (organic cation/zwitterion transporter), member 4	1.792	3.46295	0.012336
209003_at	g3387910	SLC25A11	solute carrier family 25 (mitochondrial carrier; oxoglutarate carrier), member 11	1.044	2.06194	0.006174
207088_s_at	g4506996	SLC25A11	solute carrier family 25 (mitochondrial carrier; oxoglutarate carrier), member 11	0.669	1.58997	0.029529
222705_s_at	g12803730	SLC25A15	solute carrier family 25 (mitochondrial carrier; ornithine transporter) member 15	1.632	3.09942	0.000997
218653_at	g7657584	SLC25A15	solute carrier family 25 (mitochondrial carrier; ornithine transporter) member 15	1.377	2.59728	0.000727
221020_s_at	g13540550	SLC25A32	solute carrier family 25 (mitochondrial folate carrier), member 32	0.879	1.8391	0.01008
231078_at	Hs.300496.5	SLC25A37	solute carrier family 25 (mitochondrial iron transporter), member 37	1.026	2.03637	0.006475
32091_at	4864563	SLC25A44	solute carrier family 25, member 44	1.429	2.6926	0.021001
212683_at	Hs.158286.0	SLC25A44	solute carrier family 25, member 44	1.314	2.4863	0.01406
234268_at	Hs.306388.0	SLC2A13	solute carrier family 2 (facilitated glucose transporter), member 13	0.881	1.84165	0.024838
228181_at	Hs.55610.0	SLC30A1	solute carrier family 30 (zinc transporter), member 1	1.94	3.83706	0.042366
242716_at	Hs.188417.0	SLC30A1	solute carrier family 30 (zinc transporter), member 1	0.695	1.61888	0.029466
224626_at	Hs.5566.2	SLC35A4	solute carrier family 35, member A4	0.679	1.60103	0.018665
209713_s_at	g11463948	SLC35D1	solute carrier family 35 (UDP-GlcA/UDP-GalNAc transporter), member D1	1.139	2.20228	0.032351
228060_at	Hs.20976.0	SLC35F1	solute carrier family 35, member F1	0.96	1.94531	0.006059
220123_at	g13376773	SLC35F5	solute carrier family 35, member F5	0.914	1.88426	0.014541
236219_at	Hs.134069.0	SLC35G1	solute carrier family 35, member G1	1.641	3.11882	0.010032
238638_at	Hs.148515.0	SLC37A2	solute carrier family 37 (glucose-6-phosphate transporter), member 2	1.687	3.21986	0.005337
230448_at	Hs.104767.0	SLC38A10	solute carrier family 38, member 10	1.662	3.16455	0.008634
223917_s_at	g12652672	SLC39A3	solute carrier family 39 (zinc transporter), member 3	0.724	1.65176	0.034006
225570_at	Hs.20274.0	SLC41A1	solute carrier family 41 (magnesium transporter), member 1	1.374	2.59188	0.007086
1558201_s_at	Hs2.435329.1	SLC4A1AP	solute carrier family 4 (anion exchanger), member 1, adaptor protein	0.656	1.57571	0.015755
1554027_a_at	Hs2.5462.2	SLC4A4	solute carrier family 4 (sodium bicarbonate cotransporter), member 4	1.396	2.63171	0.026521
207056_s_at	g4759133	SLC4A8	solute carrier family 4, sodium bicarbonate cotransporter, member 8	0.719	1.64604	0.04415
222155_s_at	Hs.6459.1	SLC52A2	solute carrier family 52 (riboflavin transporter), member 2	1.023	2.03214	0.044988
230658_at	Hs.153985.1	SLC7A2	solute carrier family 7 (cationic amino acid transporter, y+ system), member 2	1.369	2.58291	0.030954
235518_at	Hs.144465.0	SLC8A1	solute carrier family 8 (sodium/calcium exchanger), member 1	1.886	3.69609	0.004731
238546_at	Hs.154669.0	SLC8A1	solute carrier family 8 (sodium/calcium exchanger), member 1	1.488	2.805	0.035123
1561615_s_at	Hs2.407280.4	SLC8A1	solute carrier family 8 (sodium/calcium exchanger), member 1	1.434	2.70195	0.00832
1554728_at	Hs2.170222.2	SLC9A1	solute carrier family 9, subfamily A (NHE1, cation proton antiporter 1), member 1	0.946	1.92652	0.024127
220984_s_at	g13569931	SLCO5A1	solute carrier organic anion transporter family, member 5A1	1.01	2.01391	0.007542
228850_s_at	Hs.110373.0	SLIT2	slit guidance ligand 2	1.48	2.78949	0.043026
230130_at	Hs.110373.1	SLIT2	slit guidance ligand 2	1.179	2.2642	0.045299
209897_s_at	g4151204	SLIT2	slit guidance ligand 2	1.007	2.00973	0.018014
233051_at	Hs.21527.0	SLITRK2	SLIT and NTRK-like family, member 2	1.088	2.12579	0.002895
235451_at	Hs.165210.0	SMAD5	SMAD family member 5	0.729	1.65749	0.005348
209887_at	Hs.153863.1	SMAD6	SMAD family member 6	0.643	1.56157	0.034099
204790_at	g5174516	SMAD7	SMAD family member 7	1.838	3.57514	0.018665
241620_at	Hs.171895.0	SMCHD1	structural maintenance of chromosomes flexible hinge domain containing 1	1.756	3.3776	0.001414
241621_at	Hs.171895.0	SMCHD1	structural maintenance of chromosomes flexible hinge domain containing 1	0.91	1.87905	0.02713
225795_at	Hs.306083.0	SMDT1	single-pass membrane protein with aspartate-rich tail 1	0.719	1.64604	0.040698
237464_at	Hs.259679.0	SMG1	SMG1 phosphatidylinositol 3-kinase-related kinase	0.753	1.68529	0.033448
223188_at	g12052737	SMG9	SMG9 nonsense mediated mRNA decay factor	0.8	1.7411	0.005665
235707_at	Hs.43818.0	SMIM13	small integral membrane protein 13	1.339	2.52976	0.015336
1564651_at	Hs2.43818.1	SMIM13	small integral membrane protein 13	1.238	2.35871	0.025256
224717_s_at	Hs.227203.2	SMIM7	small integral membrane protein 7	1.414	2.66475	0.024726
223684_s_at	g12653296	SMUG1	single-strand-selective monofunctional uracil-DNA glycosylase 1	0.823	1.76908	0.019113
213139_at	Hs.93005.0	SNAI2	snail family zinc finger 2	1.511	2.85008	0.010503
223774_at	g12751091	SNHG12	small nucleolar RNA host gene 12	0.875	1.83401	0.027484
1566340_at	Hs2.437169.1	SNORD8	small nucleolar RNA, C/D box 8	1.161	2.23612	0.044868
218493_at	g13443017	SNRNP25	small nuclear ribonucleoprotein, U11/U12 25kDa subunit	0.875	1.83401	0.026348
202690_s_at	g12804598	SNRPD1	small nuclear ribonucleoprotein D1 polypeptide	0.658	1.57789	0.039636
201077_s_at	g6318598	SNU13	SNU13 homolog, small nuclear ribonucleoprotein (U4/U6.U5)	0.996	1.99446	0.013915
201076_at	g4826859	SNU13	SNU13 homolog, small nuclear ribonucleoprotein (U4/U6.U5)	0.652	1.57135	0.044559
223241_at	g4689255	SNX8	sorting nexin 8	0.855	1.80876	0.015176
209647_s_at	Hs.169836.1	SOCS5	suppressor of cytokine signaling 5	1.432	2.69821	0.005999
208127_s_at	g7662239	SOCS5	suppressor of cytokine signaling 5	1.256	2.38833	0.007573
209648_x_at	g6807674	SOCS5	suppressor of cytokine signaling 5	1.139	2.20228	0.003293
200642_at	g4507148	SOD1	superoxide dismutase 1, soluble	0.665	1.58557	0.047557
213538_at	Hs.92909.1	SON	SON DNA binding protein	0.993	1.99032	0.009259
204288_s_at	g10947117	SORBS2	sorbin and SH3 domain containing 2	2.018	4.05022	0.033819
1557354_at	Hs2.175444.1	SOS1	SOS Ras/Rac guanine nucleotide exchange factor 1	0.645	1.56374	0.015717
227034_at	Hs.28917.0	SOWAHC	sosondowah ankyrin repeat domain family member C	0.664	1.58447	0.011892
38918_at	4854816_RC	SOX13	SRY box 13	0.726	1.65405	0.026649
226913_s_at	Hs.243678.0	SOX8	SRY box 8	1.367	2.57934	0.009289
203145_at	g5453631	SPAG5	sperm associated antigen 5	0.734	1.66324	0.038486
212667_at	Hs.111779.1	SPARC	secreted protein, acidic, cysteine-rich (osteonectin)	1.735	3.32879	0.00496
200665_s_at	g4507170	SPARC	secreted protein, acidic, cysteine-rich (osteonectin)	0.929	1.90396	0.029995
225564_at	Hs.27268.0	SPATA13	spermatogenesis associated 13	1.051	2.07197	0.01475
1570130_at	Hs2.382094.1	SPATS2	spermatogenesis associated, serine-rich 2	1.039	2.0548	0.004901
241812_at	Hs.199438.0	SPATS2L	spermatogenesis associated, serine-rich 2-like	0.726	1.65405	0.035795
235572_at	Hs.165190.0	SPC24	SPC24, NDC80 kinetochore complex component	1.403	2.64451	0.007014
209891_at	g9963834	SPC25	SPC25, NDC80 kinetochore complex component	0.734	1.66324	0.040178
1559222_at	Hs2.406919.1	SPDL1	spindle apparatus coiled-coil protein 1	1.377	2.59728	0.014278
1556058_s_at	Hs2.433418.1	SPEN	spen family transcriptional repressor	1.262	2.39828	0.020312
219257_s_at	g11464966	SPHK1	sphingosine kinase 1	1.806	3.49671	0.003952
223511_at	g12224895	SPRTN	SprT-like N-terminal domain	0.749	1.68063	0.035379
225616_at	Hs.128676.0	SPRYD4	SPRY domain containing 4	0.644	1.56266	0.037027
1554053_at	Hs2.90458.2	SPTLC1	serine palmitoyltransferase, long chain base subunit 1	1.368	2.58112	0.047935
235440_at	Hs.136645.0	SPTY2D1	SPT2 chromatin protein domain containing 1	0.91	1.87905	0.015515
229594_at	Hs.44425.0	SPTY2D1	SPT2 chromatin protein domain containing 1	0.68	1.60214	0.041797
224864_at	Hs.32587.1	SRA1	steroid receptor RNA activator 1	0.825	1.77154	0.02357
1552630_a_at	Hs2.87908.1	SRCAP	Snf2-related CREBBP activator protein	0.803	1.74473	0.033482
241734_at	Hs.107622.0	SRFBP1	serum response factor binding protein 1	1.103	2.14801	0.018193
233888_s_at	Hs.18995.1	SRGAP1	SLIT-ROBO Rho GTPase activating protein 1	1.367	2.57934	0.007894
1555876_at	Hs2.422911.1	SRGAP1	SLIT-ROBO Rho GTPase activating protein 1	1.352	2.55266	0.03298
1555875_at	Hs2.422911.1	SRGAP1	SLIT-ROBO Rho GTPase activating protein 1	1.251	2.38006	0.023404
1569269_s_at	Hs2.400041.1	SRGAP1	SLIT-ROBO Rho GTPase activating protein 1	1.212	2.31659	0.02329
1554473_at	Hs2.374691.1	SRGAP1	SLIT-ROBO Rho GTPase activating protein 1	1.141	2.20534	0.03247
201516_at	g4507208	SRM	spermidine synthase	1.464	2.75872	0.001065
213608_s_at	Hs.20225.3	SRRD	SRR1 domain containing	1.111	2.15995	0.007894
225348_at	Hs.288038.2	SRSF10	serine/arginine-rich splicing factor 10	0.649	1.56808	0.043877
201129_at	g6857827	SRSF7	serine/arginine-rich splicing factor 7	1.088	2.12579	0.019546
214141_x_at	Hs.184167.1	SRSF7	serine/arginine-rich splicing factor 7	0.85	1.8025	0.011692
201004_at	g5454089	SSR4	signal sequence receptor, delta	1.462	2.7549	0.012119
203114_at	g5453837	SSSCA1	Sjogren syndrome/scleroderma autoantigen 1	0.771	1.70645	0.025659
208322_s_at	g4506950	ST3GAL1	ST3 beta-galactoside alpha-2,3-sialyltransferase 1	1.141	2.20534	0.016809
203759_at	g5454057	ST3GAL4	ST3 beta-galactoside alpha-2,3-sialyltransferase 4	0.944	1.92385	0.008083
220937_s_at	g7657622	ST6GALNAC4	ST6 (alpha-N-acetyl-neuraminyl-2,3-beta-galactosyl-1,3)-N-acetylgalactosaminide alpha-2,6-sialyltransferase 4	0.96	1.94531	0.012086
228163_at	Hs.3972.2	ST6GALNAC4	ST6 (alpha-N-acetyl-neuraminyl-2,3-beta-galactosyl-1,3)-N-acetylgalactosaminide alpha-2,6-sialyltransferase 4	0.913	1.88296	0.010503
221551_x_at	g6468226	ST6GALNAC4	ST6 (alpha-N-acetyl-neuraminyl-2,3-beta-galactosyl-1,3)-N-acetylgalactosaminide alpha-2,6-sialyltransferase 4	0.711	1.63694	0.01217
221285_at	g5174676	ST8SIA2	ST8 alpha-N-acetyl-neuraminide alpha-2,8-sialyltransferase 2	1.352	2.55266	0.02718
242686_at	Hs.231847.0	STARD13	StAR-related lipid transfer domain containing 13	1.044	2.06194	0.006411
205542_at	g9558758	STEAP1	six transmembrane epithelial antigen of the prostate 1	1.544	2.91602	0.019913
213330_s_at	Hs.75612.1	STIP1	stress-induced phosphoprotein 1	0.917	1.88818	0.006526
212009_s_at	Hs.75612.2	STIP1	stress-induced phosphoprotein 1	0.902	1.86865	0.007158
205214_at	g4758193	STK17B	serine/threonine kinase 17b	0.997	1.99585	0.002653
226525_at	Hs.37251.0	STK17B	serine/threonine kinase 17b	0.983	1.97657	0.002366
217503_at	Hs.314363.0	STK17B	serine/threonine kinase 17b	0.843	1.79378	0.009518
243797_at	Hs.88297.0	STK17B	serine/threonine kinase 17b	0.672	1.59328	0.015846
215188_at	Hs.270256.0	STK24	serine/threonine kinase 24	0.87	1.82766	0.015911
208854_s_at	Hs.168913.1	STK24	serine/threonine kinase 24	0.677	1.59881	0.02656
204701_s_at	g4759147	STOML1	stomatin (EPB72)-like 1	0.897	1.86219	0.026098
209478_at	g2071992	STRA13	stimulated by retinoic acid 13	0.735	1.6644	0.031361
1569334_at	Hs2.156362.1	STRA6	stimulated by retinoic acid 6	3.184	9.08823	0.003321
1569335_a_at	Hs2.156362.1	STRA6	stimulated by retinoic acid 6	3.081	8.46201	0.00194
221701_s_at	g13560965	STRA6	stimulated by retinoic acid 6	2.619	6.14324	0.001593
226462_at	Hs.99291.1	STXBP6	syntaxin binding protein 6 (amisyn)	0.851	1.80375	0.018435
217874_at	g11321580	SUCLG1	succinate-CoA ligase, alpha subunit	0.712	1.63807	0.028191
224202_at	g6689887	SUFU	suppressor of fused homolog (Drosophila)	1.073	2.1038	0.008662
223330_s_at	g12654186	SUGT1	SGT1 homolog, MIS12 kinetochore complex assembly cochaperone	0.858	1.81252	0.021614
231618_s_at	Hs.123656.0	SUN3	Sad1 and UNC84 domain containing 3	1.875	3.66802	0.000182
205224_at	g8924249	SURF2	surfeit 2	0.856	1.81001	0.016019
225038_s_at	Hs.274430.0	SURF6	surfeit 6	1.018	2.02511	0.044095
223822_at	g13436145	SUSD4	sushi domain containing 4	1.978	3.93947	0.005031
223821_s_at	g13436145	SUSD4	sushi domain containing 4	1.772	3.41527	0.022762
219389_at	g8922205	SUSD4	sushi domain containing 4	1.285	2.43682	0.004923
218619_s_at	g4507320	SUV39H1	suppressor of variegation 3-9 homolog 1 (Drosophila)	1.302	2.4657	0.016536
1554572_a_at	Hs2.85567.2	SUV39H2	suppressor of variegation 3-9 homolog 2 (Drosophila)	0.861	1.8163	0.014137
226278_at	Hs.284136.8	SVIP	small VCP/p97-interacting protein	1.115	2.16595	0.048225
226027_at	Hs.111335.0	SWI5	SWI5 homologous recombination repair protein	1.009	2.01252	0.02329
1554595_at	Hs2.107019.2	SYMPK	symplekin	0.668	1.58887	0.034054
217834_s_at	g5453805	SYNCRIP	synaptotagmin binding, cytoplasmic RNA interacting protein	0.894	1.85832	0.014716
210613_s_at	g12653878	SYNGR1	synaptogyrin 1	1.31	2.47942	0.003091
207594_s_at	g4507334	SYNJ1	synaptojanin 1	0.88	1.84038	0.003685
212990_at	Hs.127416.2	SYNJ1	synaptojanin 1	0.808	1.75078	0.043204
1553165_at	Hs2.15384.3	SYNRG	synergin, gamma	0.85	1.8025	0.022833
222715_s_at	Hs.15384.0	SYNRG	synergin, gamma	0.671	1.59218	0.012023
212004_at	Hs.226770.0	SZRD1	SUZ RNA binding domain containing 1	0.657	1.5768	0.014559
1569709_at	Hs2.397063.1	SZT2	seizure threshold 2 homolog (mouse)	1.051	2.07197	0.027259
217433_at	Hs.173159.1	TACC1	transforming, acidic coiled-coil containing protein 1	1.113	2.16295	0.027203
217437_s_at	Hs.173159.1	TACC1	transforming, acidic coiled-coil containing protein 1	1.065	2.09217	0.027053
221069_s_at	g7705952	TACO1	translational activator of mitochondrially encoded cytochrome c oxidase I	0.756	1.6888	0.00555
209938_at	g3258662	TADA2A	transcriptional adaptor 2A	0.71	1.6358	0.036093
1554415_at	Hs2.26782.2	TAF5L	TAF5-like RNA polymerase II, p300/CBP-associated factor (PCAF)-associated factor, 65kDa	1.516	2.85997	0.00158
200916_at	g4507356	TAGLN2	transgelin 2	0.739	1.66902	0.025917
204743_at	g10047091	TAGLN3	transgelin 3	1.233	2.35055	0.03338
201463_s_at	g5803186	TALDO1	transaldolase 1	0.838	1.78757	0.01718
203677_s_at	g7427525	TARBP2	TAR (HIV-1) RNA binding protein 2	0.716	1.64262	0.028336
213913_s_at	Hs.11912.0	TBC1D30	TBC1 domain family, member 30	0.895	1.85961	0.042942
213912_at	Hs.11912.0	TBC1D30	TBC1 domain family, member 30	0.822	1.76786	0.046024
1556429_a_at	Hs2.170268.1	TBC1D31	TBC1 domain family, member 31	1.289	2.44359	0.005232
211052_s_at	g13623514	TBCD	tubulin folding cofactor D	0.666	1.58667	0.041039
203715_at	g6006029	TBCE	tubulin folding cofactor E	0.848	1.8	0.015183
218520_at	g7019546	TBK1	TANK-binding kinase 1	0.938	1.91587	0.004923
209820_s_at	g12803114	TBL3	transducin (beta)-like 3	0.897	1.86219	0.013532
220789_s_at	g4758045	TBRG4	transforming growth factor beta regulator 4	0.789	1.72788	0.031852
40560_at	4920385	TBX2	T-box 2	0.948	1.9292	0.01586
221977_at	Hs.168357.1	TBX2	T-box 2	0.712	1.63807	0.014726
213417_at	Hs.322856.0	TBX2	T-box 2	0.687	1.60993	0.019703
219682_s_at	g7706728	TBX3	T-box 3	1.215	2.32141	0.046594
225544_at	Hs.267182.0	TBX3	T-box 3	0.92	1.89212	0.030473
229576_s_at	Hs.267182.1	TBX3	T-box 3	0.759	1.69232	0.041307
222917_s_at	Hs.332150.0	TBX3	T-box 3	0.656	1.57571	0.049422
1566208_at	Hs2.376360.1	TCEA1	transcription elongation factor A (SII), 1	0.686	1.60882	0.044672
215511_at	Hs.201668.1	TCF20	transcription factor 20 (AR1)	0.669	1.58997	0.020178
214704_at	Hs.317585.0	TCF25	transcription factor 25 (basic helix-loop-helix)	1.028	2.0392	0.048247
205254_x_at	Hs.169294.0	TCF7	transcription factor 7 (T-cell specific, HMG-box)	0.707	1.63241	0.046669
202385_s_at	g4507410	TCOF1	Treacher Collins-Franceschetti syndrome 1	1.279	2.42671	0.005923
202384_s_at	Hs.301266.0	TCOF1	Treacher Collins-Franceschetti syndrome 1	0.905	1.87254	0.002438
41037_at	4860509_RC	TEAD4	TEA domain family member 4	0.948	1.9292	0.014752
204281_at	g4507426	TEAD4	TEA domain family member 4	0.918	1.88949	0.016817
225840_at	Hs.181159.0	TEF	thyrotrophic embryonic factor	0.908	1.87644	0.048229
231867_at	Hs.173560.0	TENM2	teneurin transmembrane protein 2	2.426	5.37401	0.04598
1555183_at	Hs2.100030.2	TERF2	telomeric repeat binding factor 2	1.088	2.12579	0.030473
235872_at	Hs.63335.0	TERF2	telomeric repeat binding factor 2	0.646	1.56482	0.03954
232760_at	Hs.272315.0	TEX15	testis expressed 15	1.633	3.10157	0.003135
221448_s_at	g13775173	TEX15	testis expressed 15	1.578	2.98556	0.001827
212083_at	Hs.226138.0	TEX261	testis expressed 261	1.072	2.10235	0.037187
204653_at	Hs.18387.0	TFAP2A	transcription factor AP-2 alpha (activating enhancer binding protein 2 alpha)	1.048	2.06766	0.013305
218605_at	g11641288	TFB2M	transcription factor B2, mitochondrial	0.842	1.79253	0.012086
202751_at	g8393258	TFIP11	tuftelin interacting protein 11	1.016	2.0223	0.018151
209277_at	Hs.295944.0	TFPI2	tissue factor pathway inhibitor 2	0.903	1.86995	0.048113
203085_s_at	g12652748	TGFB1	transforming growth factor beta 1	0.732	1.66094	0.027683
209909_s_at	g339549	TGFB2	transforming growth factor beta 2	3.513	11.4161	0.039014
220407_s_at	g4507462	TGFB2	transforming growth factor beta 2	3.503	11.3373	0.008936
209908_s_at	Hs.169300.1	TGFB2	transforming growth factor beta 2	1.459	2.74918	0.030948
205210_at	g4759259	TGFBRAP1	transforming growth factor beta receptor associated protein 1	0.927	1.90132	0.011223
236371_s_at	Hs.29075.0	TGS1	trimethylguanosine synthase 1	1.068	2.09652	0.018512
219231_at	g13376235	TGS1	trimethylguanosine synthase 1	1.048	2.06766	0.016519
238346_s_at	Hs.29075.1	TGS1	trimethylguanosine synthase 1	0.903	1.86995	0.034682
1554492_at	Hs2.436229.1	THADA	thyroid adenoma associated	2.102	4.29304	0.017995
1566889_at	Hs2.385478.1	THADA	thyroid adenoma associated	1.209	2.31177	0.013416
224057_s_at	g12653946	THAP4	THAP domain containing 4	0.722	1.64947	0.047669
203083_at	g4507486	THBS2	thrombospondin 2	0.836	1.78509	0.018421
219122_s_at	g8923513	THG1L	tRNA-histidine guanylyltransferase 1-like	0.862	1.81756	0.0453
242163_at	Hs.250113.0	THRAP3	thyroid hormone receptor associated protein 3	0.9	1.86607	0.012916
230021_at	Hs.124874.0	TICRR	TOPBP1-interacting checkpoint and replication regulator	1.128	2.18556	0.015016
218408_at	g6912707	TIMM10	translocase of inner mitochondrial membrane 10 homolog (yeast)	1.564	2.95672	0.001591
1555764_s_at	Hs2.235750.2	TIMM10	translocase of inner mitochondrial membrane 10 homolog (yeast)	1.416	2.66845	0.003029
218188_s_at	g11024699	TIMM13	translocase of inner mitochondrial membrane 13 homolog (yeast)	1.099	2.14206	0.018825
201822_at	g5454119	TIMM17A	translocase of inner mitochondrial membrane 17 homolog A (yeast)	1.37	2.58471	0.007236
201821_s_at	g13325239	TIMM17A	translocase of inner mitochondrial membrane 17 homolog A (yeast)	1.193	2.28628	0.00527
215171_s_at	Hs.20716.1	TIMM17A	translocase of inner mitochondrial membrane 17 homolog A (yeast)	0.645	1.56374	0.007542
222841_s_at	Hs.87595.0	TIMM22	translocase of inner mitochondrial membrane 22 homolog (yeast)	0.722	1.64947	0.044363
225535_s_at	Hs.11866.1	TIMM23	translocase of inner mitochondrial membrane 23 homolog (yeast)	0.654	1.57352	0.032969
224913_s_at	Hs.233952.2	TIMM50	translocase of inner mitochondrial membrane 50 homolog (S. cerevisiae)	0.969	1.95748	0.002486
205217_at	g6138974	TIMM8A	translocase of inner mitochondrial membrane 8 homolog A (yeast)	1.481	2.79142	0.000864
[truncated: 226 more rows]

## Sheet: Downregulated Probes ρ0 v ρ+
Probe Set ID	Transcript ID (Array Design)	Gene Symbol	Gene Title	log2FC ρ(0CTL)/ρ(+)	Fold-Change ρ(0CTL)/ρ(+)	FDR p-value ρ(0CTL)/ρ(+)
217757_at	g6226959	A2M	alpha-2-macroglobulin	-2.798	-6.95476	0.000723
228041_at	Hs.104347.0	AASDH	aminoadipate-semialdehyde dehydrogenase	-0.928	-1.90264	0.042664
209460_at	g9963907	ABAT	4-aminobutyrate aminotransferase	-1.458	-2.74727	0.028892
209459_s_at	g9963907	ABAT	4-aminobutyrate aminotransferase	-1.807	-3.49914	0.023032
213353_at	Hs.180513.0	ABCA5	ATP binding cassette subfamily A member 5	-1.287	-2.4402	0.016809
241705_at	Hs.98368.0	ABCA5	ATP binding cassette subfamily A member 5	-1.492	-2.81279	0.018287
1570505_at	Hs2.434244.1	ABCB4	ATP binding cassette subfamily B member 4	-1.746	-3.35427	0.005337
207819_s_at	g9961253	ABCB4	ATP binding cassette subfamily B member 4	-2.181	-4.53468	0.000235
208161_s_at	g9955971	ABCC3	ATP binding cassette subfamily C member 3	-0.973	-1.96292	0.037271
203982_s_at	g4826957	ABCD4	ATP binding cassette subfamily D member 4	-0.697	-1.62113	0.012371
203981_s_at	Hs.94395.4	ABCD4	ATP binding cassette subfamily D member 4	-1.195	-2.28945	0.007894
211113_s_at	g1314276	ABCG1	ATP binding cassette subfamily G member 1	-1.102	-2.14652	0.007226
204567_s_at	g8051574	ABCG1	ATP binding cassette subfamily G member 1	-1.38	-2.60268	0.002563
232081_at	Hs.6655.0	ABCG1	ATP binding cassette subfamily G member 1	-2.729	-6.62996	0.001205
230913_at	Hs.59525.0	ABCG1	ATP binding cassette subfamily G member 1	-3.329	-10.0491	0.001884
237974_at	Hs.196582.0	ABHD12B	abhydrolase domain containing 12B	-2.027	-4.07556	0.002517
236240_at	Hs.164302.0	ABHD18	abhydrolase domain containing 18	-0.934	-1.91057	0.03494
241968_at	Hs.143995.0	ABHD18	abhydrolase domain containing 18	-1.826	-3.54553	0.011331
242023_at	Hs.130232.0	ABHD4	abhydrolase domain containing 4	-0.872	-1.8302	0.01217
212895_s_at	Hs.118021.2	ABR	active BCR-related	-0.999	-1.99861	0.004132
229164_s_at	Hs.107812.2	ABTB1	ankyrin repeat and BTB (POZ) domain containing 1	-0.944	-1.92385	0.013608
221928_at	Hs.234898.0	ACACB	acetyl-CoA carboxylase beta	-0.818	-1.76296	0.007486
49452_at	4867939_RC	ACACB	acetyl-CoA carboxylase beta	-1.039	-2.0548	0.007076
43427_at	4811882_RC	ACACB	acetyl-CoA carboxylase beta	-1.085	-2.12138	0.005407
212977_at	Hs.23016.0	ACKR3	atypical chemokine receptor 3	-1.599	-3.02933	0.025903
237622_at	Hs.104091.0	ACO1	aconitase 1, soluble	-1.234	-2.35218	0.025143
229534_at	Hs.49433.0	ACOT4	acyl-CoA thioesterase 4	-0.918	-1.88949	0.029115
218844_at	g13376740	ACSF2	acyl-CoA synthetase family member 2	-0.803	-1.74473	0.014354
223665_at	g13383264	ACTRT3	actin-related protein T3	-1.082	-2.11697	0.02372
236126_at	Hs.42302.0	ACVR2B	activin A receptor type IIB	-0.715	-1.64148	0.007507
1559548_at	Hs2.174273.1	ACVR2B	activin A receptor type IIB	-0.865	-1.82134	0.005999
207665_at	g11497039	ADAM21	ADAM metallopeptidase domain 21	-0.714	-1.64035	0.024102
1552579_a_at	Hs2.178748.1	ADAM21	ADAM metallopeptidase domain 21	-1.517	-2.86195	0.008636
226814_at	Hs.16450.0	ADAMTS9	ADAM metallopeptidase with thrombospondin type 1 motif 9	-1.921	-3.78685	0.003233
213974_at	Hs.18705.0	ADAMTSL3	ADAMTS like 3	-3.116	-8.66981	0.003064
201752_s_at	Hs.324470.1	ADD3	adducin 3 (gamma)	-0.965	-1.95206	0.031965
205638_at	g4502358	ADGRB3	adhesion G protein-coupled receptor B3	-2.134	-4.38933	0.011109
1553025_at	Hs2Affx.1.4	ADGRG6	adhesion G protein-coupled receptor G6	-1.265	-2.40327	0.003477
213094_at	Hs.44197.0	ADGRG6	adhesion G protein-coupled receptor G6	-1.296	-2.45547	0.02656
228042_at	Hs.100926.0	ADPRH	ADP-ribosylarginine hydrolase	-0.891	-1.85446	0.022461
238505_at	Hs.300425.0	ADPRH	ADP-ribosylarginine hydrolase	-0.997	-1.99585	0.010615
229277_at	Hs.37744.0	ADRB1	adrenoceptor beta 1	-0.695	-1.61888	0.01995
229309_at	Hs.37744.0	ADRB1	adrenoceptor beta 1	-0.97	-1.95884	0.036176
215451_s_at	Hs.114765.2	AFF1	AF4/FMR2 family, member 1	-0.867	-1.82387	0.021534
201924_at	g5174572	AFF1	AF4/FMR2 family, member 1	-0.975	-1.96564	0.00939
241091_at	Hs.202057.0	AGO3	argonaute RISC catalytic component 3	-1.201	-2.29899	0.032171
235782_at	Hs.127341.0	AGO3	argonaute RISC catalytic component 3	-1.591	-3.01258	0.021405
227930_at	Hs.21887.0	AGO4	argonaute RISC catalytic component 4	-1.538	-2.90392	0.037236
228667_at	Hs.127958.0	AGPAT4	1-acylglycerol-3-phosphate O-acyltransferase 4	-2.188	-4.55673	9.7e-05
209173_at	g6652811	AGR2	anterior gradient 2, protein disulphide isomerase family member	-2.632	-6.19885	0.00135
204500_s_at	g7662451	AGTPBP1	ATP/GTP binding protein 1	-0.953	-1.93589	0.045012
238135_at	Hs.121906.0	AGTRAP	angiotensin II receptor-associated protein	-1.438	-2.70945	0.028912
207464_at	g7662535	AHCYL1	adenosylhomocysteinase like 1	-1.201	-2.29899	0.013559
200849_s_at	Hs.4113.0	AHCYL1	adenosylhomocysteinase like 1	-1.376	-2.59548	0.001659
200850_s_at	g5729723	AHCYL1	adenosylhomocysteinase like 1	-1.59	-3.01049	0.006875
200848_at	Hs.4113.0	AHCYL1	adenosylhomocysteinase like 1	-1.602	-3.03564	0.003117
229354_at	Hs.24087.0	AHRR	aryl-hydrocarbon receptor repressor	-1.073	-2.1038	0.006819
1556210_at	Hs2.48645.1	AIG1	androgen-induced 1	-2.241	-4.72725	0.006195
1556212_x_at	Hs2.48645.1	AIG1	androgen-induced 1	-2.349	-5.09471	0.006
1556211_a_at	Hs2.48645.1	AIG1	androgen-induced 1	-2.584	-5.996	0.002154
212543_at	Hs.161002.0	AIM1	absent in melanoma 1	-1.011	-2.01531	0.014356
224655_at	Hs.43436.1	AK3	adenylate kinase 3	-1.046	-2.0648	0.045233
204347_at	Hs.274691.0	AK4	adenylate kinase 4	-0.985	-1.97931	0.00573
230630_at	Hs.292805.0	AK4	adenylate kinase 4	-1.01	-2.01391	0.005596
225342_at	Hs.10862.0	AK4	adenylate kinase 4	-1.259	-2.3933	0.007256
230846_at	Hs.22902.0	AKAP5	A kinase (PRKA) anchor protein 5	-1.438	-2.70945	0.020328
218373_at	g11968026	AKTIP	AKT interacting protein	-0.85	-1.8025	0.045757
207015_s_at	g10835044	ALDH1A2	aldehyde dehydrogenase 1 family, member A2	-1.121	-2.17498	0.004667
207016_s_at	g3970845	ALDH1A2	aldehyde dehydrogenase 1 family, member A2	-2.66	-6.32033	0.000586
1558649_at	Hs2.293230.1	ALDH1A3	aldehyde dehydrogenase 1 family, member A3	-0.792	-1.73147	0.044402
204289_at	Hs.293970.0	ALDH6A1	aldehyde dehydrogenase 6 family, member A1	-1.02	-2.02792	0.012587
227438_at	Hs.96840.0	ALPK1	alpha kinase 1	-1.441	-2.71509	0.02276
226291_at	Hs.27669.0	ALS2	ALS2, alsin Rho guanine nucleotide exchange factor	-0.68	-1.60214	0.04184
1563792_at	Hs2.376552.1	AMN	amnion associated transmembrane protein	-0.688	-1.61105	0.046594
226258_at	Hs.12296.0	AMN1	antagonist of mitotic exit network 1 homolog	-1.112	-2.16145	0.035504
212360_at	Hs.82927.0	AMPD2	adenosine monophosphate deaminase 2	-1.035	-2.04911	0.016536
209491_s_at	Hs.83918.1	AMPD3	adenosine monophosphate deaminase 3	-1.135	-2.19619	0.039411
207992_s_at	g4502078	AMPD3	adenosine monophosphate deaminase 3	-1.553	-2.93427	0.002488
204294_at	g4502082	AMT	aminomethyltransferase	-1.126	-2.18253	0.042615
205141_at	g4557312	ANG	angiogenin, ribonuclease, RNase A family, 5	-1.555	-2.93834	0.003669
220144_s_at	g11545808	ANKEF1	ankyrin repeat and EF-hand domain containing 1	-1.225	-2.33755	0.036524
220076_at	g10947057	ANKH	ANKH inorganic pyrophosphate transport regulator	-1.018	-2.02511	0.047184
218093_s_at	g8923103	ANKRD10	ankyrin repeat domain 10	-1.054	-2.07628	0.01028
239196_at	Hs.217484.0	ANKRD22	ankyrin repeat domain 22	-2.246	-4.74366	0.031583
238332_at	Hs.135560.0	ANKRD29	ankyrin repeat domain 29	-1.845	-3.59253	0.005534
229308_at	Hs.42500.1	ANKRD29	ankyrin repeat domain 29	-2.742	-6.68997	0.007748
220940_at	g13449272	ANKRD36B	ankyrin repeat domain 36B	-1.499	-2.82647	0.010356
1555898_at	Hs2.406128.1	ANKRD36C	ankyrin repeat domain 36C	-2.345	-5.0806	0.006689
226641_at	Hs.11571.0	ANKRD44	ankyrin repeat domain 44	-1.515	-2.85799	0.008549
228471_at	Hs.145053.0	ANKRD44	ankyrin repeat domain 44	-1.608	-3.04829	0.01648
204671_s_at	Hs.30991.0	ANKRD6	ankyrin repeat domain 6	-1.627	-3.0887	0.002175
211712_s_at	g13543331	ANXA9	annexin A9	-0.65	-1.56917	0.027248
219023_at	g8923996	AP1AR	adaptor-related protein complex 1 associated regulatory protein	-0.733	-1.66209	0.015056
201613_s_at	g12653494	AP1G2	adaptor-related protein complex 1, gamma 2 subunit	-1.952	-3.86911	0.002088
231714_s_at	Hs.28298.0	AP4B1	adaptor-related protein complex 4, beta 1 subunit	-0.988	-1.98343	0.020928
236221_at	Hs.130858.0	AP4B1	adaptor-related protein complex 4, beta 1 subunit	-1.338	-2.52801	0.025067
210278_s_at	g5442367	AP4S1	adaptor-related protein complex 4, sigma 1 subunit	-0.973	-1.96292	0.007001
209871_s_at	g3953612	APBA2	amyloid beta (A4) precursor protein-binding, family A, member 2	-1.078	-2.11111	0.00593
226358_at	Hs.29894.0	APH1B	APH1B gamma secretase subunit	-0.926	-1.9	0.003521
221013_s_at	g13562089	APOL2	apolipoprotein L, 2	-0.777	-1.71356	0.006995
241869_at	Hs.233304.0	APOL6	apolipoprotein L, 6	-0.995	-1.99308	0.011011
219716_at	g13449280	APOL6	apolipoprotein L, 6	-1.129	-2.18707	0.003113
1557236_at	Hs2.349076.1	APOL6	apolipoprotein L, 6	-1.382	-2.60629	0.001751
1557116_at	Hs2.363456.1	APOL6	apolipoprotein L, 6	-1.889	-3.70378	0.001054
202630_at	Hs.84084.0	APPBP2	amyloid beta precursor protein (cytoplasmic tail) binding protein 2	-1.178	-2.26263	0.002136
222518_at	Hs.118249.0	ARFGEF2	ADP-ribosylation factor guanine nucleotide-exchange factor 2 (brefeldin A-inhibited)	-0.691	-1.6144	0.008346
242098_at	Hs.274803.0	ARFGEF3	ARFGEF family member 3	-1.779	-3.43188	0.002977
231856_at	Hs.194408.0	ARFGEF3	ARFGEF family member 3	-1.915	-3.77114	0.009504
228051_at	Hs.102720.0	ARFGEF3	ARFGEF family member 3	-2.336	-5.04901	0.000997
236037_at	Hs.170352.0	ARFGEF3	ARFGEF family member 3	-2.629	-6.18597	0.000269
203946_s_at	g1763757	ARG2	arginase 2	-2.122	-4.35297	0.004087
1554736_at	Hs2.70983.2	ARHGAP29	Rho GTPase activating protein 29	-0.948	-1.9292	0.043936
226056_at	Hs.300670.0	ARHGAP31	Rho GTPase activating protein 31	-0.658	-1.57789	0.031852
226057_at	Hs.300670.0	ARHGAP31	Rho GTPase activating protein 31	-1.828	-3.55045	8.4e-05
215232_at	Hs.6336.2	ARHGAP44	Rho GTPase activating protein 44	-0.694	-1.61776	0.009643
1552627_a_at	Hs2.267831.1	ARHGAP5	Rho GTPase activating protein 5	-1.173	-2.2548	0.006411
217936_at	Hs.267831.0	ARHGAP5	Rho GTPase activating protein 5	-1.408	-2.65369	0.026384
233849_s_at	Hs.267831.1	ARHGAP5	Rho GTPase activating protein 5	-1.5	-2.82843	0.011881
235635_at	Hs.47026.0	ARHGAP5	Rho GTPase activating protein 5	-2.243	-4.7338	0.040337
206167_s_at	g7382476	ARHGAP6	Rho GTPase activating protein 6	-2.397	-5.26707	0.003725
205062_x_at	g13259496	ARID4A	AT rich interactive domain 4A (RBP1-like)	-1.516	-2.85997	0.005167
230141_at	Hs.26455.0	ARID4A	AT rich interactive domain 4A (RBP1-like)	-1.766	-3.4011	0.017293
1558401_at	Hs2.163832.1	ARIH1	ariadne RBR E3 ubiquitin protein ligase 1	-1.108	-2.15547	0.015239
228843_at	Hs.10475.0	ARL10	ADP-ribosylation factor like GTPase 10	-0.737	-1.66671	0.044363
213433_at	Hs.6220.0	ARL3	ADP-ribosylation factor like GTPase 3	-1.344	-2.53854	0.010699
218832_x_at	g10880135	ARRB1	arrestin, beta 1	-0.673	-1.59438	0.032502
228444_at	Hs.112278.2	ARRB1	arrestin, beta 1	-0.858	-1.81252	0.023299
221861_at	Hs.22483.0	ARRB1	arrestin, beta 1	-0.98	-1.97247	0.010622
49111_at	4846606	ARRB1	arrestin, beta 1	-1.014	-2.0195	0.01932
43511_s_at	4856361_RC	ARRB1	arrestin, beta 1	-1.096	-2.13761	0.020128
225283_at	Hs.6093.0	ARRDC4	arrestin domain containing 4	-2.714	-6.56138	0.001902
239147_at	Hs.151380.0	ARSK	arylsulfatase family, member K	-0.79	-1.72907	0.014148
217516_x_at	Hs.328358.0	ARVCF	armadillo repeat gene deleted in velocardiofacial syndrome	-0.784	-1.7219	0.010839
238878_at	Hs.103538.0	ARX	aristaless related homeobox	-1.891	-3.70892	0.007124
223652_at	g9963860	AS3MT	arsenite methyltransferase	-0.755	-1.68763	0.020704
231791_at	Hs.283514.0	ASAH2B	N-acylsphingosine amidohydrolase (non-lysosomal ceramidase) 2B	-0.662	-1.58227	0.031351
1553453_at	Hs2.381357.1	ASB14	ankyrin repeat and SOCS box containing 14	-0.774	-1.71	0.027984
237785_at	Hs.125804.0	ASB14	ankyrin repeat and SOCS box containing 14	-1.02	-2.02792	0.005269
213197_at	Hs.6788.0	ASTN1	astrotactin 1	-1.713	-3.27842	0.003429
228381_at	Hs.97179.0	ATF7IP2	activating transcription factor 7 interacting protein 2	-0.83	-1.77769	0.034222
204568_at	g7662325	ATG14	autophagy related 14	-1.104	-2.1495	0.011738
225883_at	Hs.21051.0	ATG16L2	autophagy related 16-like 2	-0.758	-1.69114	0.027634
229389_at	Hs.20065.0	ATG16L2	autophagy related 16-like 2	-1.276	-2.42167	0.03895
219359_at	g13376651	ATHL1	ATH1, acid trehalase-like 1 (yeast)	-0.942	-1.92119	0.030627
223340_at	g4406631	ATL1	atlastin GTPase 1	-1.309	-2.4777	0.039954
212672_at	Hs.194382.2	ATM	ATM serine/threonine kinase	-0.675	-1.5966	0.010329
208442_s_at	g4502266	ATM	ATM serine/threonine kinase	-0.804	-1.74594	0.034967
1554631_at	Hs2.194382.4	ATM	ATM serine/threonine kinase	-1.4	-2.63902	0.01082
240242_at	Hs.124590.0	ATP13A4	ATPase type 13A4	-0.645	-1.56374	0.013074
230453_s_at	Hs.5541.1	ATP2A3	ATPase, Ca++ transporting, ubiquitous	-1.194	-2.28786	0.004324
213036_x_at	Hs.5541.2	ATP2A3	ATPase, Ca++ transporting, ubiquitous	-1.218	-2.32624	0.005596
207522_s_at	g4885076	ATP2A3	ATPase, Ca++ transporting, ubiquitous	-1.266	-2.40494	0.011161
211755_s_at	g13543617	ATP5F1	ATP synthase, H+ transporting, mitochondrial Fo complex subunit B1	-0.672	-1.59328	0.021644
243501_at	Hs.191834.0	ATP5F1	ATP synthase, H+ transporting, mitochondrial Fo complex subunit B1	-1.038	-2.05338	0.010754
206993_at	g7661835	ATP5S	ATP synthase, H+ transporting, mitochondrial Fo complex subunit s (factor B)	-0.8	-1.7411	0.007084
244670_at	Hs.186500.0	ATP5S	ATP synthase, H+ transporting, mitochondrial Fo complex subunit s (factor B)	-1.284	-2.43513	0.033971
208898_at	g11999089	ATP6V1D	ATPase, H+ transporting, lysosomal 34kDa, V1 subunit D	-0.648	-1.56699	0.033042
235864_at	Hs.199726.0	ATP6V1D	ATPase, H+ transporting, lysosomal 34kDa, V1 subunit D	-0.935	-1.91189	0.003205
214923_at	Hs.306415.0	ATP6V1D	ATPase, H+ transporting, lysosomal 34kDa, V1 subunit D	-1.215	-2.32141	0.014726
205197_s_at	Hs.606.0	ATP7A	ATPase, Cu++ transporting, alpha polypeptide	-1.037	-2.05196	0.010315
213106_at	Hs.180737.0	ATP8A1	ATPase, aminophospholipid transporter (APLT), class I, type 8A, member 1	-0.798	-1.73869	0.032799
208860_s_at	g606832	ATRX	alpha thalassemia/mental retardation syndrome X-linked	-0.912	-1.88165	0.019832
235240_at	Hs.46648.0	ATXN3	ataxin 3	-1.295	-2.45377	0.01605
238999_at	Hs.103812.0	AVIL	advillin	-0.756	-1.6888	0.007894
222498_at	Hs.164478.0	AZI2	5-azacytidine induced 2	-0.895	-1.85961	0.044461
225612_s_at	Hs.101799.0	B3GNT5	UDP-GlcNAc:betaGal beta-1,3-N-acetylglucosaminyltransferase 5	-0.708	-1.63354	0.023233
1554835_a_at	Hs2.136414.2	B3GNT5	UDP-GlcNAc:betaGal beta-1,3-N-acetylglucosaminyltransferase 5	-0.801	-1.74231	0.012318
1555962_at	Hs2.299329.2	B3GNT7	UDP-GlcNAc:betaGal beta-1,3-N-acetylglucosaminyltransferase 7	-1.316	-2.48975	0.0102
1555963_x_at	Hs2.299329.2	B3GNT7	UDP-GlcNAc:betaGal beta-1,3-N-acetylglucosaminyltransferase 7	-1.663	-3.16674	0.008052
229909_at	Hs.98969.0	B4GALNT3	beta-1,4-N-acetyl-galactosaminyl transferase 3	-0.84	-1.79005	0.020692
229403_at	Hs.198248.2	B4GALT1	UDP-Gal:betaGlcNAc beta 1,4- galactosyltransferase, polypeptide 1	-0.714	-1.64035	0.022833
211631_x_at	g183670	B4GALT1	UDP-Gal:betaGlcNAc beta 1,4- galactosyltransferase, polypeptide 1	-0.847	-1.79876	0.033271
216627_s_at	Hs.198248.3	B4GALT1	UDP-Gal:betaGlcNAc beta 1,4- galactosyltransferase, polypeptide 1	-0.891	-1.85446	0.045693
210540_s_at	g13325453	B4GALT4	UDP-Gal:betaGlcNAc beta 1,4- galactosyltransferase, polypeptide 4	-0.638	-1.55617	0.035383
206232_s_at	g4757829	B4GALT6	UDP-Gal:betaGlcNAc beta 1,4- galactosyltransferase, polypeptide 6	-0.905	-1.87254	0.03181
218899_s_at	g13376199	BAALC	brain and acute leukemia, cytoplasmic	-0.807	-1.74957	0.043963
227051_at	Hs.43047.0	BACE2	beta-site APP-cleaving enzyme 2	-1.404	-2.64634	0.034184
221234_s_at	g13540489	BACH2	BTB and CNC homology 1, basic leucine zipper transcription factor 2	-1.556	-2.94037	0.004984
217986_s_at	g7304918	BAZ1A	bromodomain adjacent to zinc finger domain 1A	-0.672	-1.59328	0.01251
203080_s_at	g7304922	BAZ2B	bromodomain adjacent to zinc finger domain 2B	-2.667	-6.35107	0.007212
211692_s_at	g13591689	BBC3	BCL2 binding component 3	-0.698	-1.62225	0.009814
239864_at	Hs.188631.0	BBIP1	BBSome interacting protein 1	-1.014	-2.0195	0.004846
220173_at	g13376590	BBOF1	basal body orientation factor 1	-1.261	-2.39662	0.005594
218471_s_at	g13375892	BBS1	Bardet-Biedl syndrome 1	-0.997	-1.99585	0.0255
229603_at	Hs.26912.0	BBS12	Bardet-Biedl syndrome 12	-1.518	-2.86394	0.016809
223227_at	g13507378	BBS2	Bardet-Biedl syndrome 2	-1.262	-2.39828	0.017403
219688_at	g8922614	BBS7	Bardet-Biedl syndrome 7	-0.929	-1.90396	0.015347
209958_s_at	g4588086	BBS9	Bardet-Biedl syndrome 9	-0.901	-1.86736	0.006788
203053_at	g5031652	BCAS2	breast carcinoma amplified sequence 2	-1.347	-2.54383	0.002498
205681_at	g4757839	BCL2A1	BCL2-related protein A1	-1.471	-2.77214	0.022833
217955_at	g7662505	BCL2L13	BCL2-like 13 (apoptosis facilitator)	-0.982	-1.9752	0.009531
226798_at	Hs.10267.3	BCL2L13	BCL2-like 13 (apoptosis facilitator)	-1.194	-2.28786	0.045384
204908_s_at	g4885086	BCL3	B-cell CLL/lymphoma 3	-1.425	-2.68515	0.019773
239249_at	Hs.29557.0	BCL6	B-cell CLL/lymphoma 6	-0.816	-1.76052	0.011398
228758_at	Hs.63920.0	BCL6	B-cell CLL/lymphoma 6	-1.15	-2.21914	0.002349
218285_s_at	g10047131	BDH2	3-hydroxybutyrate dehydrogenase, type 2	-1.224	-2.33593	0.01064
205870_at	g4557358	BDKRB2	bradykinin receptor B2	-1.77	-3.41054	0.004233
1568820_a_at	Hs2.158768.1	BEND6	BEN domain containing 6	-1.642	-3.12098	0.024415
231175_at	Hs.12431.0	BEND6	BEN domain containing 6	-1.946	-3.85305	0.025246
227341_at	Hs.12369.0	BEND7	BEN domain containing 7	-1.05	-2.07053	0.031564
224367_at	g13625167	BEX2	brain expressed X-linked 2	-3.17	-9.00047	0.00011
206746_at	g13518027	BFSP1	beaded filament structural protein 1, filensin	-1.189	-2.27995	0.002392
201170_s_at	g4503298	BHLHE40	basic helix-loop-helix family, member e40	-1.724	-3.30351	0.048537
231964_at	Hs.137206.0	BICD1	bicaudal D homolog 1 (Drosophila)	-1.238	-2.35871	0.009044
230499_at	Hs.121572.0	BIRC3	baculoviral IAP repeat containing 3	-1.803	-3.48945	0.000873
210538_s_at	g1145290	BIRC3	baculoviral IAP repeat containing 3	-3.937	-15.3163	1.3e-05
222826_at	g13435968	BLOC1S6	biogenesis of lysosomal organelles complex-1, subunit 6, pallidin	-0.741	-1.67133	0.040013
226530_at	Hs.44021.0	BMF	Bcl2 modifying factor	-1.798	-3.47738	0.000663
211518_s_at	g576934	BMP4	bone morphogenetic protein 4	-0.765	-1.69937	0.005169
235275_at	Hs.112819.0	BMP8B	bone morphogenetic protein 8b	-1.007	-2.00973	0.045816
203502_at	g4502444	BPGM	2,3-bisphosphoglycerate mutase	-0.748	-1.67946	0.046125
226391_at	Hs.96566.0	BRAF	B-Raf proto-oncogene, serine/threonine kinase	-0.77	-1.70527	0.045762
226580_at	Hs.181035.0	BRMS1L	breast cancer metastasis-suppressor 1-like	-0.716	-1.64262	0.039076
214820_at	Hs.152108.0	BRWD1	bromodomain and WD repeat domain containing 1	-0.713	-1.63921	0.036105
219280_at	g11321643	BRWD1	bromodomain and WD repeat domain containing 1	-1.081	-2.1155	0.013367
231860_at	Hs.137240.0	BRWD1	bromodomain and WD repeat domain containing 1	-1.138	-2.20076	0.003681
238890_at	Hs.136470.0	BRWD1	bromodomain and WD repeat domain containing 1	-1.271	-2.41329	0.006763
1553227_s_at	Hs2.225674.2	BRWD1	bromodomain and WD repeat domain containing 1	-1.348	-2.54559	0.003483
231960_at	Hs.172932.0	BRWD1	bromodomain and WD repeat domain containing 1	-1.384	-2.60991	0.019092
244738_at	Hs.134880.0	BRWD3	bromodomain and WD repeat domain containing 3	-0.817	-1.76174	0.038875
1553252_a_at	Hs2.134880.1	BRWD3	bromodomain and WD repeat domain containing 3	-0.97	-1.95884	0.010392
215349_at	Hs.272209.0	BTBD18	BTB (POZ) domain containing 18	-0.97	-1.95884	0.008939
205299_s_at	g6453812	BTN2A2	butyrophilin, subfamily 2, member A2	-0.757	-1.68997	0.045896
205298_s_at	Hs.91813.0	BTN2A2	butyrophilin, subfamily 2, member A2	-0.926	-1.9	0.011169
204821_at	g6325463	BTN3A3	butyrophilin, subfamily 3, member A3	-1.347	-2.54383	0.001973
38241_at	4853366	BTN3A3	butyrophilin, subfamily 3, member A3	-1.474	-2.77791	0.000596
209183_s_at	g6807650	C10orf10	chromosome 10 open reading frame 10	-1.804	-3.49187	0.049453
226313_at	Hs.94943.0	C10orf35	chromosome 10 open reading frame 35	-0.771	-1.70645	0.018672
219240_s_at	g13376420	C10orf88	chromosome 10 open reading frame 88	-0.785	-1.72309	0.010167
220141_at	g13376186	C11orf63	chromosome 11 open reading frame 63	-1.918	-3.77899	0.042374
236840_at	Hs.28700.0	C12orf56	chromosome 12 open reading frame 56	-1.507	-2.84218	0.010599
226583_at	Hs.18370.0	C12orf76	chromosome 12 open reading frame 76	-0.637	-1.55509	0.038603
231859_at	Hs.167135.0	C14orf132	chromosome 14 open reading frame 132	-1.116	-2.16745	0.029357
218820_at	g9910205	C14orf132	chromosome 14 open reading frame 132	-1.961	-3.89332	0.0158
218298_s_at	g13376436	C14orf159	chromosome 14 open reading frame 159	-1.151	-2.22068	0.000715
235369_at	Hs.82098.0	C14orf28	chromosome 14 open reading frame 28	-1.598	-3.02723	0.024503
240201_at	Hs.130173.0	C15orf40	chromosome 15 open reading frame 40	-0.916	-1.88688	0.031168
223484_at	g12656020	C15orf48	chromosome 15 open reading frame 48	-3.256	-9.55331	0.010904
1560814_a_at	Hs2.324127.4	C15orf57	chromosome 15 open reading frame 57	-1.458	-2.74727	0.01251
230281_at	Hs.81446.0	C16orf46	chromosome 16 open reading frame 46	-1.691	-3.2288	0.00605
229071_at	Hs.262480.0	C17orf100	chromosome 17 open reading frame 100	-2.098	-4.28115	0.004402
240771_at	Hs.104926.0	C1orf101	chromosome 1 open reading frame 101	-0.895	-1.85961	0.044336
218546_at	g13376004	C1orf115	chromosome 1 open reading frame 115	-1	-2	0.01988
1560554_a_at	Hs2.319781.1	C1orf145	chromosome 1 open reading frame 145	-1.079	-2.11257	0.019832
223126_s_at	Hs.12532.0	C1orf21	chromosome 1 open reading frame 21	-0.961	-1.94666	0.035795
221272_s_at	g13540595	C1orf21	chromosome 1 open reading frame 21	-1.52	-2.86791	0.019731
223127_s_at	Hs.12532.0	C1orf21	chromosome 1 open reading frame 21	-1.596	-3.02304	0.012599
228135_at	Hs.26226.0	C1orf52	chromosome 1 open reading frame 52	-0.64	-1.55833	0.031037
220988_s_at	g13569918	C1QTNF3	C1q and tumor necrosis factor related protein 3	-1.976	-3.93401	0.000282
218983_at	g7706082	C1RL	complement component 1, r subcomponent-like	-2.351	-5.10178	0.000608
225825_at	Hs.119021.0	C20orf194	chromosome 20 open reading frame 194	-0.946	-1.92652	0.014752
226607_at	Hs.323795.0	C20orf194	chromosome 20 open reading frame 194	-1.227	-2.3408	0.002562
1553789_a_at	Hs2.236572.1	C21orf58	chromosome 21 open reading frame 58	-0.935	-1.91189	0.013693
223923_at	g13436346	C21orf62	chromosome 21 open reading frame 62	-0.826	-1.77276	0.033129
241031_at	Hs.202656.0	C2CD4A	C2 calcium-dependent domain containing 4A	-6.219	-74.4913	2e-06
229306_at	Hs.126909.0	C2CD4B	C2 calcium-dependent domain containing 4B	-1.752	-3.36825	0.006707
236070_at	Hs.128295.0	C2orf81	chromosome 2 open reading frame 81	-1.078	-2.11111	0.002251
224602_at	Hs.173705.0	C4orf3	chromosome 4 open reading frame 3	-0.971	-1.9602	0.0158
224604_at	Hs.173705.0	C4orf3	chromosome 4 open reading frame 3	-2.014	-4.03901	0.003518
224605_at	Hs.173705.0	C4orf3	chromosome 4 open reading frame 3	-2.196	-4.58207	0.002083
1552919_at	Hs2.187780.1	C4orf36	chromosome 4 open reading frame 36	-1.321	-2.49839	0.013428
237585_at	Hs.160323.0	C4orf47	chromosome 4 open reading frame 47	-0.966	-1.95342	0.019383
236915_at	Hs.143659.0	C4orf47	chromosome 4 open reading frame 47	-2.233	-4.70111	0.012074
1557828_a_at	Hs2.283566.1	C5orf28	chromosome 5 open reading frame 28	-0.817	-1.76174	0.017325
238635_at	Hs.111314.0	C5orf28	chromosome 5 open reading frame 28	-1.048	-2.06766	0.003914
239623_at	Hs.102915.0	C5orf63	chromosome 5 open reading frame 63	-1.546	-2.92006	0.004984
236642_at	Hs.100866.0	C5orf63	chromosome 5 open reading frame 63	-1.968	-3.91225	0.000532
230404_at	Hs.49573.0	C5orf63	chromosome 5 open reading frame 63	-2.078	-4.22221	0.000651
244761_at	Hs.270630.0	C5orf63	chromosome 5 open reading frame 63	-2.121	-4.34995	0.000353
221787_at	Hs.12342.0	C6orf120	chromosome 6 open reading frame 120	-0.893	-1.85703	0.010765
241455_at	Hs.135744.0	C6orf132	chromosome 6 open reading frame 132	-0.839	-1.78881	0.030126
220755_s_at	g8393383	C6orf48	chromosome 6 open reading frame 48	-0.684	-1.60659	0.037135
1552793_at	Hs2.211038.1	C8orf31	chromosome 8 open reading frame 31	-1.112	-2.16145	0.004833
218541_s_at	g9910147	C8orf4	chromosome 8 open reading frame 4	-5.655	-50.3877	0.000176
225919_s_at	Hs.23607.0	C9orf72	chromosome 9 open reading frame 72	-1.731	-3.31958	0.035143
1553134_s_at	Hs2.23607.1	C9orf72	chromosome 9 open reading frame 72	-2.065	-4.18434	0.031583
235866_at	Hs.42722.0	C9orf85	chromosome 9 open reading frame 85	-0.756	-1.6888	0.010615
238537_at	Hs.193576.0	CA8	carbonic anhydrase VIII	-0.954	-1.93724	0.012302
219276_x_at	g13376229	CAAP1	caspase activity and apoptosis inhibitor 1	-1.12	-2.17347	0.009145
204811_s_at	g5174402	CACNA2D2	calcium channel, voltage-dependent, alpha 2/delta subunit 2	-1.054	-2.07628	0.012948
219714_s_at	g8923764	CACNA2D3	calcium channel, voltage-dependent, alpha 2/delta subunit 3	-2.069	-4.19596	0.01586
209032_s_at	g7767238	CADM1	cell adhesion molecule 1	-0.851	-1.80375	0.04299
209002_s_at	g13112006	CALCOCO1	calcium binding and coiled-coil domain 1	-1.239	-2.36035	0.028162
210815_s_at	g662328	CALCRL	calcitonin receptor like receptor	-3.883	-14.7536	0.000507
234996_at	Hs.201591.0	CALCRL	calcitonin receptor like receptor	-4.16	-17.8766	4.4e-05
206331_at	g5031620	CALCRL	calcitonin receptor like receptor	-5.118	-34.7273	4.9e-05
204392_at	g4580415	CAMK1	calcium/calmodulin-dependent protein kinase I	-0.69	-1.61328	0.025327
228555_at	Hs.32553.0	CAMK2D	calcium/calmodulin-dependent protein kinase II delta	-1.211	-2.31498	0.023371
224994_at	Hs.111460.0	CAMK2D	calcium/calmodulin-dependent protein kinase II delta	-1.314	-2.4863	0.028752
223460_at	g13276654	CAMKK1	calcium/calmodulin-dependent protein kinase kinase 1, alpha	-0.719	-1.64604	0.00718
228705_at	Hs.182485.1	CAPN12	calpain 12	-0.758	-1.69114	0.027211
210944_s_at	g13111992	CAPN3	calpain 3	-1.001	-2.00139	0.003938
1555608_at	Hs2.234355.3	CAPRIN2	caprin family member 2	-0.654	-1.57352	0.011878
218456_at	g12965192	CAPRIN2	caprin family member 2	-0.774	-1.71	0.010765
208374_s_at	g5453596	CAPZA1	capping protein (actin filament) muscle Z-line, alpha 1	-1.204	-2.30378	0.00217
241275_at	Hs.283489.0	CAPZA1	capping protein (actin filament) muscle Z-line, alpha 1	-1.943	-3.84504	0.010171
224414_s_at	g13605448	CARD6	caspase recruitment domain family, member 6	-1.792	-3.46295	0.029822
204950_at	g7662403	CARD8	caspase recruitment domain family, member 8	-1.397	-2.63353	0.011562
1554479_a_at	Hs2.10031.2	CARD8	caspase recruitment domain family, member 8	-1.974	-3.92856	0.020188
1555391_a_at	Hs2.122970.3	CARF	calcium responsive transcription factor	-0.667	-1.58777	0.044375
219834_at	g13376067	CARF	calcium responsive transcription factor	-1.593	-3.01676	0.011176
212586_at	Hs.247043.2	CAST	calpastatin	-0.758	-1.69114	0.048212
207625_s_at	g4826662	CBFA2T2	core-binding factor, runt domain, alpha subunit 2; translocated to, 2	-1.168	-2.247	0.014563
220301_at	g13376139	CCDC102B	coiled-coil domain containing 102B	-2.214	-4.6396	0.003117
1553542_at	Hs2Affx.1.27	CCDC125	coiled-coil domain containing 125	-0.869	-1.8264	0.005151
229082_at	Hs.151464.0	CCDC125	coiled-coil domain containing 125	-0.918	-1.88949	0.008238
225017_at	Hs.17731.0	CCDC14	coiled-coil domain containing 14	-0.968	-1.95613	0.014979
1561054_a_at	Hs2.60340.1	CCDC14	coiled-coil domain containing 14	-1.058	-2.08204	0.023723
1557366_at	Hs2.399769.1	CCDC144B	coiled-coil domain containing 144B (pseudogene)	-0.819	-1.76418	0.015031
1561271_at	Hs2.328147.1	CCDC144CP	coiled-coil domain containing 144C, pseudogene	-1.202	-2.30058	0.00561
227091_at	Hs.113940.0	CCDC146	coiled-coil domain containing 146	-1.435	-2.70382	0.008542
229626_at	Hs.251699.0	CCDC184	coiled-coil domain containing 184	-1.563	-2.95468	0.017311
228476_at	Hs.15370.0	CCDC191	coiled-coil domain containing 191	-1.03	-2.04202	0.015487
226713_at	Hs.10198.0	CCDC50	coiled-coil domain containing 50	-0.919	-1.8908	0.005793
228693_at	Hs.166674.0	CCDC50	coiled-coil domain containing 50	-0.944	-1.92385	0.021459
222577_at	Hs.154938.0	CCDC90B	coiled-coil domain containing 90B	-0.731	-1.65979	0.049178
218175_at	g13376724	CCDC92	coiled-coil domain containing 92	-1.455	-2.74157	0.019735
216598_s_at	Hs.303649.1	CCL2	chemokine (C-C motif) ligand 2	-3.324	-10.0144	0.020787
205476_at	g4759075	CCL20	chemokine (C-C motif) ligand 20	-0.816	-1.76052	0.039595
224240_s_at	g10312151	CCL28	chemokine (C-C motif) ligand 28	-0.969	-1.95748	0.00802
238750_at	Hs.218707.0	CCL28	chemokine (C-C motif) ligand 28	-1.073	-2.1038	0.003043
224027_at	g12002126	CCL28	chemokine (C-C motif) ligand 28	-1.827	-3.54799	0.001913
223084_s_at	g7677485	CCNDBP1	cyclin D-type binding-protein 1	-1.092	-2.13169	0.04098
202770_s_at	g4757935	CCNG2	cyclin G2	-3.164	-8.96311	0.045599
222999_s_at	g12005729	CCNL2	cyclin L2	-0.862	-1.81756	0.019163
221427_s_at	g13569904	CCNL2	cyclin L2	-1.031	-2.04344	0.018284
227280_s_at	Hs.4190.1	CCNYL1	cyclin Y like 1	-0.804	-1.74594	0.038737
1569878_at	Hs2.311188.1	CCNYL2	cyclin Y-like 2, pseudogene	-3.312	-9.93142	0.000229
211744_s_at	g13543544	CD58	CD58 molecule	-1.367	-2.57934	0.046425
216942_s_at	Hs.75626.2	CD58	CD58 molecule	-1.376	-2.59548	0.030887
205173_x_at	g4502676	CD58	CD58 molecule	-1.42	-2.67586	0.035171
222061_at	Hs.287995.0	CD58	CD58 molecule	-1.494	-2.81669	0.012119
209795_at	g291897	CD69	CD69 molecule	-2.426	-5.37401	0.001871
205758_at	Hs.85258.0	CD8A	CD8a molecule	-0.735	-1.6644	0.03232
202878_s_at	g11496985	CD93	CD93 molecule	-1.921	-3.78685	0.024629
232172_at	Hs.30799.0	CD99P1	CD99 molecule pseudogene 1	-0.642	-1.56049	0.032193
205288_at	g4502696	CDC14A	cell division cycle 14A	-0.86	-1.81504	0.019239
210440_s_at	g3136327	CDC14A	cell division cycle 14A	-0.927	-1.90132	0.011922
202284_s_at	g11386202	CDKN1A	cyclin-dependent kinase inhibitor 1A (p21, Cip1)	-1.536	-2.89989	0.011881
228861_at	Hs.135040.0	CDS2	CDP-diacylglycerol synthase 2	-0.73	-1.65864	0.039595
228456_s_at	Hs.126857.1	CDS2	CDP-diacylglycerol synthase 2	-0.945	-1.92519	0.014546
203973_s_at	g4885130	CEBPD	CCAAT/enhancer binding protein (C/EBP), delta	-2.168	-4.494	0.000455
213006_at	Hs.76722.1	CEBPD	CCAAT/enhancer binding protein (C/EBP), delta	-3.105	-8.60396	0.001591
223729_at	g13183792	CECR2	cat eye syndrome chromosome region, candidate 2	-1.589	-3.00841	0.004884
239752_at	Hs.231895.0	CECR2	cat eye syndrome chromosome region, candidate 2	-1.716	-3.28524	0.022563
224393_s_at	g13560309	CECR6	cat eye syndrome chromosome region, candidate 6	-0.848	-1.8	0.009531
223654_s_at	g13278791	CELF4	CUGBP, Elav-like family member 4	-0.735	-1.6644	0.004953
230497_at	Hs.45209.0	CELF5	CUGBP, Elav-like family member 5	-1.265	-2.40327	0.00959
36499_at	4873647	CELSR2	cadherin, EGF LAG seven-pass G-type receptor 2	-1.657	-3.1536	0.001828
204029_at	g13325063	CELSR2	cadherin, EGF LAG seven-pass G-type receptor 2	-1.701	-3.25126	0.001678
235956_at	Hs.114889.0	CEP126	centrosomal protein 126kDa	-1.329	-2.51228	0.022728
236325_at	Hs.63356.0	CEP126	centrosomal protein 126kDa	-1.424	-2.68328	0.008142
219375_at	g5174414	CEPT1	choline/ethanolamine phosphotransferase 1	-1.204	-2.30378	0.011456
218421_at	g12232440	CERK	ceramide kinase	-0.833	-1.78139	0.015655
231084_at	Hs.112757.0	CFAP43	cilia and flagella associated protein 43	-1.535	-2.89788	0.003064
237755_s_at	Hs.122614.0	CFAP52	cilia and flagella associated protein 52	-0.777	-1.71356	0.027683
1557544_at	Hs2.397592.1	CFAP58	cilia and flagella associated protein 58	-1.228	-2.34242	0.028405
203854_at	g4504578	CFI	complement factor I	-1.05	-2.07053	0.011293
235427_at	Hs.110286.0	CFLAR	CASP8 and FADD like apoptosis regulator	-1.363	-2.57219	0.004374
224599_at	Hs.86041.2	CGGBP1	CGG triplet repeat binding protein 1	-0.819	-1.76418	0.031983
206861_s_at	g4502790	CGGBP1	CGG triplet repeat binding protein 1	-0.879	-1.8391	0.010201
224600_at	Hs.86041.2	CGGBP1	CGG triplet repeat binding protein 1	-0.998	-1.99723	0.012772
1554015_a_at	Hs2.36787.2	CHD2	chromodomain helicase DNA binding protein 2	-1.011	-2.01531	0.03056
225077_at	Hs.166254.2	CHD2	chromodomain helicase DNA binding protein 2	-1.276	-2.42167	0.022833
218803_at	g8922674	CHFR	checkpoint with forkhead and ring finger domains, E3 ubiquitin protein ligase	-1.239	-2.36035	0.011399
204193_at	g6978648	CHKB	choline kinase beta	-1.566	-2.96083	0.005265
211419_s_at	g457229	CHN2	chimerin 2	-0.995	-1.99308	0.007981
211248_s_at	g11494372	CHRD	chordin	-1.026	-2.03637	0.027259
223737_x_at	g12711480	CHST9	carbohydrate (N-acetylgalactosamine 4-0) sulfotransferase 9	-0.973	-1.96292	0.044099
224400_s_at	g13561519	CHST9	carbohydrate (N-acetylgalactosamine 4-0) sulfotransferase 9	-1.361	-2.56863	0.035681
226736_at	Hs.228598.0	CHURC1	churchill domain containing 1	-1.313	-2.48458	0.01357
225623_at	Hs.22452.0	CIPC	CLOCK-interacting pacemaker	-0.732	-1.66094	0.012906
207980_s_at	g5174416	CITED2	Cbp/p300-interacting transactivator, with Glu/Asp rich carboxy-terminal domain, 2	-0.787	-1.72548	0.03488
209357_at	g4193945	CITED2	Cbp/p300-interacting transactivator, with Glu/Asp rich carboxy-terminal domain, 2	-0.891	-1.85446	0.00446
213628_at	Hs.93121.3	CLCC1	chloride channel CLIC-like 1	-1.248	-2.37512	0.001739
207855_s_at	g13194194	CLCC1	chloride channel CLIC-like 1	-1.424	-2.68328	0.008996
1555543_a_at	Hs2.93121.3	CLCC1	chloride channel CLIC-like 1	-1.613	-3.05887	0.006829
203950_s_at	g4502872	CLCN6	chloride channel, voltage-sensitive 6	-0.853	-1.80625	0.010767
228706_s_at	Hs.183617.1	CLDN23	claudin 23	-1.385	-2.61172	0.004881
228707_at	Hs.183617.1	CLDN23	claudin 23	-2.063	-4.17854	0.000323
209732_at	g13528920	CLEC2B	C-type lectin domain family 2, member B	-0.775	-1.71119	0.033922
1556209_at	Hs2.348583.1	CLEC2B	C-type lectin domain family 2, member B	-2.037	-4.10391	0.002627
233500_x_at	Hs.136748.2	CLEC2D	C-type lectin domain family 2, member D	-1.289	-2.44359	0.024285
220132_s_at	g7019446	CLEC2D	C-type lectin domain family 2, member D	-2.001	-4.00277	0.019472
242913_at	Hs.278714.0	CLIC6	chloride intracellular channel 6	-1.398	-2.63536	0.009283
227742_at	Hs.128685.0	CLIC6	chloride intracellular channel 6	-1.621	-3.07588	0.008001
225759_x_at	Hs.118164.1	CLMN	calmin (calponin-like, transmembrane)	-1.253	-2.38337	0.020928
213839_at	Hs.301478.0	CLMN	calmin (calponin-like, transmembrane)	-2.389	-5.23794	0.000379
204050_s_at	g4502898	CLTA	clathrin, light chain A	-0.709	-1.63467	0.022623
1555738_at	Hs2Affx.1.450	CMTM1	CKLF-like MARVEL transmembrane domain containing 1	-0.928	-1.90264	0.010356
243051_at	Hs.164002.0	CNIH4	cornichon family AMPA receptor auxiliary protein 4	-0.832	-1.78015	0.008148
213436_at	Hs.75110.1	CNR1	cannabinoid receptor 1 (brain)	-1.008	-2.01112	0.010604
231464_at	Hs.128474.0	CNTNAP3	contactin associated protein-like 3	-0.687	-1.60993	0.038099
1552496_a_at	Hs2.33010.1	COBL	cordon-bleu WH2 repeat protein	-0.891	-1.85446	0.03048
213050_at	Hs.33010.0	COBL	cordon-bleu WH2 repeat protein	-1.841	-3.58258	0.003659
1554241_at	Hs2.21016.2	COCH	cochlin	-1.053	-2.07484	0.008941
205229_s_at	Hs.21016.0	COCH	cochlin	-2.194	-4.57572	0.000882
1554242_a_at	Hs2.21016.2	COCH	cochlin	-2.719	-6.58416	0.0005
211343_s_at	g180828	COL13A1	collagen, type XIII, alpha 1	-0.808	-1.75078	0.023115
211809_x_at	g178319	COL13A1	collagen, type XIII, alpha 1	-0.829	-1.77645	0.030433
225288_at	Hs.284394.1	COL27A1	collagen, type XXVII, alpha 1	-0.977	-1.96837	0.03486
225293_at	Hs.284394.1	COL27A1	collagen, type XXVII, alpha 1	-1.058	-2.08204	0.005008
213492_at	Hs.81343.0	COL2A1	collagen, type II, alpha 1	-1.852	-3.61	0.00058
229779_at	Hs.119471.0	COL4A4	collagen, type IV, alpha 4	-1.486	-2.80111	0.039333
214602_at	Hs.180828.0	COL4A4	collagen, type IV, alpha 4	-1.888	-3.70122	0.000415
213992_at	Hs.408.2	COL4A6	collagen, type IV, alpha 6	-1	-2	0.04914
214587_at	Hs.114599.0	COL8A1	collagen, type VIII, alpha 1	-3.401	-10.5634	0.00058
226237_at	Hs.41271.0	COL8A1	collagen, type VIII, alpha 1	-4.932	-30.5267	6.5e-05
221900_at	Hs.249239.0	COL8A2	collagen, type VIII, alpha 2	-1.209	-2.31177	0.001186
52651_at	4847354_RC	COL8A2	collagen, type VIII, alpha 2	-1.341	-2.53327	0.000612
204724_s_at	g4502966	COL9A3	collagen, type IX, alpha 3	-0.944	-1.92385	0.012587
1561948_at	Hs2.127747.1	COQ10B	coenzyme Q10B	-1.22	-2.32947	0.048113
232126_at	Hs.144304.0	COQ2	coenzyme Q2 4-hydroxybenzoate polyprenyltransferase	-0.701	-1.62563	0.049427
227177_at	Hs.89986.0	CORO2A	coronin, actin binding protein, 2A	-0.794	-1.73388	0.017279
209789_at	Hs.24907.0	CORO2B	coronin, actin binding protein, 2B	-1.507	-2.84218	0.012483
227442_at	Hs.94560.0	COX18	COX18 cytochrome c oxidase assembly factor	-0.669	-1.58997	0.03589
238199_x_at	Hs.292378.0	COX3	cytochrome c oxidase III	-6.829	-113.693	2e-06
229600_s_at	Hs.5057.1	CPD	carboxypeptidase D	-0.868	-1.82513	0.010694
201941_at	Hs.5057.0	CPD	carboxypeptidase D	-0.918	-1.88949	0.013428
201942_s_at	g3641620	CPD	carboxypeptidase D	-1.022	-2.03073	0.015464
204920_at	g5020419	CPS1	carbamoyl-phosphate synthase 1	-0.903	-1.86995	0.002136
217564_s_at	Hs.326685.0	CPS1	carbamoyl-phosphate synthase 1	-0.985	-1.97931	0.004259
205544_s_at	g4503026	CR2	complement component (3d/Epstein Barr virus) receptor 2	-0.927	-1.90132	0.034484
218142_s_at	g10047097	CRBN	cereblon	-1.268	-2.40827	0.001221
222533_at	Hs.18925.0	CRBN	cereblon	-1.317	-2.49147	0.007507
205931_s_at	g4758499	CREB5	cAMP responsive element binding protein 5	-1.703	-3.25577	0.006161
229228_at	Hs.21342.0	CREB5	cAMP responsive element binding protein 5	-1.969	-3.91497	0.000773
203368_at	g7661643	CRELD1	cysteine rich with EGF-like domains 1	-0.888	-1.85061	0.029107
223475_at	g12002310	CRISPLD1	cysteine-rich secretory protein LCCL domain containing 1	-1.114	-2.16445	0.002873
212180_at	Hs.5613.0	CRKL	v-crk avian sarcoma virus CT10 oncogene homolog-like	-0.651	-1.57026	0.010812
223644_s_at	g5639940	CRYGS	crystallin gamma S	-1.045	-2.06337	0.018825
223643_at	Hs.134126.0	CRYGS	crystallin gamma S	-1.115	-2.16595	0.013081
226151_x_at	Hs.17834.3	CRYZL1	crystallin zeta like 1	-0.825	-1.77154	0.049362
222975_s_at	Hs.69855.1	CSDE1	cold shock domain containing E1, RNA binding	-1.018	-2.02511	0.004142
202646_s_at	Hs.260523.0	CSDE1	cold shock domain containing E1, RNA binding	-1.07	-2.09943	0.009484
219939_s_at	g6005738	CSDE1	cold shock domain containing E1, RNA binding	-1.229	-2.34404	0.007651
207082_at	g4503074	CSF1	colony stimulating factor 1 (macrophage)	-1.659	-3.15798	0.006609
209716_at	g181134	CSF1	colony stimulating factor 1 (macrophage)	-1.908	-3.75288	0.00135
210340_s_at	g12803600	CSF2RA	colony stimulating factor 2 receptor, alpha, low-affinity (granulocyte-macrophage)	-1.213	-2.31819	0.012165
207442_at	g4503078	CSF3	colony stimulating factor 3	-1.325	-2.50533	0.041499
222235_s_at	Hs.287761.0	CSGALNACT2	chondroitin sulfate N-acetylgalactosaminyltransferase 2	-0.686	-1.60882	0.048806
233145_at	Hs.160962.0	CSMD2	CUB and Sushi multiple domains 2	-1.499	-2.82647	0.003412
1557143_at	Hs2.345063.1	CSMD2	CUB and Sushi multiple domains 2	-2.385	-5.22344	0.014947
220462_at	g13376463	CSRNP3	cysteine-serine-rich nuclear protein 3	-0.946	-1.92652	0.010699
235017_s_at	Hs.118145.0	CSRNP3	cysteine-serine-rich nuclear protein 3	-0.947	-1.92786	0.007204
235355_at	Hs.122593.0	CSRNP3	cysteine-serine-rich nuclear protein 3	-1.504	-2.83628	0.00437
219435_at	g13376664	CTC1	CTS telomere maintenance complex component 1	-1.13	-2.18859	0.005534
225681_at	Hs.283713.0	CTHRC1	collagen triple helix repeat containing 1	-0.683	-1.60547	0.017047
202450_s_at	g4503150	CTSK	cathepsin K	-1.839	-3.57762	0.000379
239525_at	Hs.129993.0	CTTNBP2NL	CTTNBP2 N-terminal like	-1.299	-2.46058	0.00601
231822_at	Hs.23921.2	CTTNBP2NL	CTTNBP2 N-terminal like	-1.356	-2.55974	0.001306
226000_at	Hs.23921.0	CTTNBP2NL	CTTNBP2 N-terminal like	-1.369	-2.58291	0.004532
239155_at	Hs.44648.0	CXADR	coxsackie virus and adenovirus receptor	-1.065	-2.09217	0.019266
203917_at	g4503172	CXADR	coxsackie virus and adenovirus receptor	-1.129	-2.18707	0.007689
226374_at	Hs.7956.0	CXADR	coxsackie virus and adenovirus receptor	-1.166	-2.24389	0.013496
204470_at	g4504152	CXCL1	chemokine (C-X-C motif) ligand 1 (melanoma growth stimulating activity, alpha)	-3.578	-11.9422	0.000419
230101_at	Hs.75765.1	CXCL2	chemokine (C-X-C motif) ligand 2	-1.842	-3.58507	0.005435
209774_x_at	g183626	CXCL2	chemokine (C-X-C motif) ligand 2	-3.7	-12.996	0.00058
207850_at	g4504156	CXCL3	chemokine (C-X-C motif) ligand 3	-2.683	-6.4219	0.000855
211506_s_at	g12641914	CXCL8	chemokine (C-X-C motif) ligand 8	-3.925	-15.1895	0.000282
202859_x_at	g10834977	CXCL8	chemokine (C-X-C motif) ligand 8	-3.968	-15.649	0.001767
229774_at	Hs.12248.0	CXXC4	CXXC finger protein 4	-1.078	-2.11111	0.026384
215785_s_at	Hs.258503.2	CYFIP2	cytoplasmic FMR1 interacting protein 2	-1.143	-2.2084	0.005999
220999_s_at	g13562115	CYFIP2	cytoplasmic FMR1 interacting protein 2	-1.494	-2.81669	0.005166
226632_at	Hs.95120.0	CYGB	cytoglobin	-1.055	-2.07772	0.034901
39582_at	4856906_RC	CYLD	cylindromatosis (turban tumor syndrome)	-1.169	-2.24856	0.019197
213295_at	Hs.26295.0	CYLD	cylindromatosis (turban tumor syndrome)	-1.419	-2.674	0.013577
219825_at	g9845284	CYP26B1	cytochrome P450, family 26, subfamily B, polypeptide 1	-1.961	-3.89332	0.001752
1568868_at	Hs2.407639.1	CYP27C1	cytochrome P450, family 27, subfamily C, polypeptide 1	-0.928	-1.90264	0.030126
205073_at	g4503226	CYP2J2	cytochrome P450, family 2, subfamily J, polypeptide 2	-0.904	-1.87125	0.048406
226402_at	Hs.109087.0	CYP2U1	cytochrome P450, family 2, subfamily U, polypeptide 1	-1.027	-2.03778	0.024599
235719_at	Hs.99237.0	CYP4V2	cytochrome P450, family 4, subfamily V, polypeptide 2	-0.756	-1.6888	0.038443
216060_s_at	Hs.197751.2	DAAM1	dishevelled associated activator of morphogenesis 1	-1.355	-2.55797	0.004261
226666_at	Hs.197751.0	DAAM1	dishevelled associated activator of morphogenesis 1	-1.497	-2.82255	0.00437
1555989_at	Hs2.356537.1	DAAM1	dishevelled associated activator of morphogenesis 1	-1.553	-2.93427	0.005596
205471_s_at	Hs.63931.0	DACH1	dachshund family transcription factor 1	-1.058	-2.08204	0.046024
228915_at	Hs.30098.0	DACH1	dachshund family transcription factor 1	-1.918	-3.77899	0.003745
215184_at	Hs.266662.0	DAPK2	death-associated protein kinase 2	-0.83	-1.77769	0.047826
222234_s_at	Hs.301394.1	DBNDD1	dysbindin (dystrobrevin binding protein 1) domain containing 1	-1.179	-2.2642	0.004935
231919_at	Hs.257043.0	DBT	dihydrolipoamide branched chain transacylase E2	-0.968	-1.95613	0.036918
244687_at	Hs.199210.0	DBT	dihydrolipoamide branched chain transacylase E2	-1.073	-2.1038	0.002455
222804_x_at	Hs.317589.0	DCAF10	DDB1 and CUL4 associated factor 10	-0.823	-1.76908	0.041584
219001_s_at	g13236596	DCAF10	DDB1 and CUL4 associated factor 10	-1.18	-2.26577	0.018262
227251_at	Hs.284294.1	DCAF5	DDB1 and CUL4 associated factor 5	-0.929	-1.90396	0.006308
224697_at	Hs.284294.0	DCAF5	DDB1 and CUL4 associated factor 5	-0.953	-1.93589	0.008796
224703_at	Hs.284294.0	DCAF5	DDB1 and CUL4 associated factor 5	-1.149	-2.2176	0.001659
224696_s_at	Hs.284294.0	DCAF5	DDB1 and CUL4 associated factor 5	-1.177	-2.26106	0.001189
222101_s_at	Hs.9658.1	DCHS1	dachsous cadherin-related 1	-1.058	-2.08204	0.001125
203409_at	g4557514	DDB2	damage-specific DNA binding protein 2	-0.974	-1.96428	0.025236
225965_at	Hs.7076.0	DDHD1	DDHD domain containing 1	-0.738	-1.66786	0.012119
225971_at	Hs.7076.0	DDHD1	DDHD domain containing 1	-0.782	-1.71951	0.02321
225970_at	Hs.7076.0	DDHD1	DDHD domain containing 1	-0.883	-1.84421	0.01449
243705_at	Hs.250164.0	DDHD1	DDHD domain containing 1	-0.896	-1.8609	0.019753
244154_at	Hs.202641.0	DDHD1	DDHD domain containing 1	-1.324	-2.50359	0.025648
210749_x_at	g403386	DDR1	discoidin domain receptor tyrosine kinase 1	-1.096	-2.13761	0.020409
208779_x_at	g306474	DDR1	discoidin domain receptor tyrosine kinase 1	-1.113	-2.16295	0.015165
1007_s_at	U48705mRNA	DDR1	discoidin domain receptor tyrosine kinase 1	-1.148	-2.21606	0.013162
207169_x_at	g7669486	DDR1	discoidin domain receptor tyrosine kinase 1	-1.173	-2.2548	0.016536
204977_at	g13514830	DDX10	DEAD (Asp-Glu-Ala-Asp) box polypeptide 10	-1.01	-2.01391	0.027537
230974_at	Hs.127325.0	DDX19B	DEAD (Asp-Glu-Ala-Asp) box polypeptide 19B	-0.773	-1.70882	0.03579
223331_s_at	g5359630	DDX20	DEAD (Asp-Glu-Ala-Asp) box polypeptide 20	-0.931	-1.9066	0.013608
238525_at	Hs.303345.0	DDX56	DEAD (Asp-Glu-Ala-Asp) box helicase 56	-0.684	-1.60659	0.022833
242961_x_at	Hs.263536.0	DDX58	DEAD (Asp-Glu-Ala-Asp) box polypeptide 58	-1.243	-2.3669	0.004142
222793_at	Hs.145612.0	DDX58	DEAD (Asp-Glu-Ala-Asp) box polypeptide 58	-1.483	-2.79529	0.005569
218943_s_at	g7657515	DDX58	DEAD (Asp-Glu-Ala-Asp) box polypeptide 58	-1.566	-2.96083	0.001323
218986_s_at	g8923037	DDX60	DEAD (Asp-Glu-Ala-Asp) box polypeptide 60	-0.891	-1.85446	0.038953
221885_at	Hs.6385.0	DENND2A	DENN/MADD domain containing 2A	-0.656	-1.57571	0.033365
53991_at	4874135	DENND2A	DENN/MADD domain containing 2A	-1.428	-2.69073	0.010843
221886_at	Hs.6385.0	DENND2A	DENN/MADD domain containing 2A	-2.769	-6.81635	0.003871
230769_at	Hs.55409.0	DENND2C	DENN/MADD domain containing 2C	-1.116	-2.16745	0.036928
238524_at	Hs.312582.0	DENND2D	DENN/MADD domain containing 2D	-0.879	-1.8391	0.016973
226867_at	Hs.29032.0	DENND4C	DENN/MADD domain containing 4C	-1.013	-2.0181	0.038707
205684_s_at	g8923616	DENND4C	DENN/MADD domain containing 4C	-1.245	-2.37019	0.014197
205223_at	g7662221	DEPDC5	DEP domain containing 5	-0.76	-1.69349	0.019092
203695_s_at	g4758153	DFNA5	deafness, autosomal dominant 5	-0.852	-1.805	0.046284
226605_at	Hs.31709.0	DGKQ	diacylglycerol kinase theta	-0.633	-1.55079	0.033112
236332_at	Hs.36049.0	DHRS7	dehydrogenase/reductase (SDR family) member 7	-1.365	-2.57576	0.016372
210788_s_at	g6318547	DHRS7	dehydrogenase/reductase (SDR family) member 7	-1.605	-3.04196	0.002807
213868_s_at	Hs.109201.2	DHRS7	dehydrogenase/reductase (SDR family) member 7	-1.659	-3.15798	0.002807
212888_at	Hs.325625.0	DICER1	dicer 1, ribonuclease type III	-0.723	-1.65061	0.010329
216281_at	Hs.87889.2	DICER1	dicer 1, ribonuclease type III	-0.76	-1.69349	0.019539
213229_at	Hs.87889.1	DICER1	dicer 1, ribonuclease type III	-0.765	-1.69937	0.008231
206061_s_at	g13449288	DICER1	dicer 1, ribonuclease type III	-0.88	-1.84038	0.005999
1552677_a_at	Hs2.322903.1	DIP2A	disco-interacting protein 2 homolog A	-1.467	-2.76446	0.001272
227199_at	Hs.122142.0	DIP2A	disco-interacting protein 2 homolog A	-1.513	-2.85403	0.000992
229213_at	Hs.15326.0	DIRC2	disrupted in renal carcinoma 2	-1.031	-2.04344	0.005348
212728_at	Hs.11101.0	DLG3	discs, large homolog 3 (Drosophila)	-0.796	-1.73628	0.008166
212729_at	Hs.11101.0	DLG3	discs, large homolog 3 (Drosophila)	-1.109	-2.15696	0.031373
207732_s_at	g10863920	DLG3	discs, large homolog 3 (Drosophila)	-1.372	-2.58829	0.006035
212727_at	Hs.11101.0	DLG3	discs, large homolog 3 (Drosophila)	-2.02	-4.05584	0.000608
224215_s_at	g6180181	DLL1	delta-like 1 (Drosophila)	-1.978	-3.93947	0.01154
203301_s_at	g10863946	DMTF1	cyclin D binding myb-like transcription factor 1	-0.696	-1.62001	0.032452
228111_s_at	Hs.9740.0	DNAH1	dynein, axonemal, heavy chain 1	-0.67	-1.59107	0.0407
237804_at	Hs.132871.0	DNAH11	dynein, axonemal, heavy chain 11	-2.022	-4.06146	0.005751
232381_s_at	Hs.127699.0	DNAH5	dynein, axonemal, heavy chain 5	-2.249	-4.75353	0.002256
214222_at	Hs.97403.0	DNAH7	dynein, axonemal, heavy chain 7	-1.043	-2.06051	0.036032
223722_at	g5815354	DNAJC12	DnaJ (Hsp40) homolog, subfamily C, member 12	-1.285	-2.43682	0.022002
238115_at	Hs.4845.0	DNAJC18	DnaJ (Hsp40) homolog, subfamily C, member 18	-1.496	-2.8206	0.005869
220372_at	g8923432	DNAJC28	DnaJ (Hsp40) homolog, subfamily C, member 28	-0.796	-1.73628	0.023737
204721_s_at	g7662145	DNAJC6	DnaJ (Hsp40) homolog, subfamily C, member 6	-0.887	-1.84933	0.011038
1558546_at	Hs2.348705.1	DNASE1	deoxyribonuclease I	-0.677	-1.59881	0.010671
228929_at	Hs.203866.0	DNASE1	deoxyribonuclease I	-0.785	-1.72309	0.028461
243127_x_at	Hs.183803.0	DNASE1	deoxyribonuclease I	-0.823	-1.76908	0.003362
240144_at	Hs.202383.0	DNASE1	deoxyribonuclease I	-1.058	-2.08204	0.003831
224825_at	Hs.26213.0	DNTTIP1	deoxynucleotidyltransferase, terminal, interacting protein 1	-0.73	-1.65864	0.010622
234942_s_at	Hs.108319.2	DNTTIP1	deoxynucleotidyltransferase, terminal, interacting protein 1	-0.956	-1.93992	0.009503
203187_at	g4503354	DOCK1	dedicator of cytokinesis 1	-0.795	-1.73508	0.021164
213482_at	Hs.7022.0	DOCK3	dedicator of cytokinesis 3	-1.443	-2.71886	0.000303
225502_at	Hs.171118.0	DOCK8	dedicator of cytokinesis 8	-0.838	-1.78757	0.04305
232843_s_at	Hs.171118.1	DOCK8	dedicator of cytokinesis 8	-1.196	-2.29104	0.008334
231980_at	Hs.303172.0	DOK6	docking protein 6	-1.463	-2.75681	0.005224
240838_s_at	Hs.233785.0	DRAIC	downregulated RNA in cancer, inhibitor of cell invasion and migration	-0.65	-1.56917	0.018697
225228_at	Hs.125031.1	DRAM2	DNA-damage regulated autophagy modulator 2	-1.722	-3.29893	0.001073
225230_at	Hs.125031.1	DRAM2	DNA-damage regulated autophagy modulator 2	-1.852	-3.61	8.1e-05
231033_at	Hs.106243.0	DSC2	desmocollin 2	-1.195	-2.28945	0.00135
204751_x_at	g13435365	DSC2	desmocollin 2	-1.831	-3.55784	0.000665
204750_s_at	Hs.239727.0	DSC2	desmocollin 2	-1.834	-3.56524	0.002411
226817_at	Hs.95612.0	DSC2	desmocollin 2	-2.141	-4.41068	0.001026
217901_at	Hs.2631.0	DSG2	desmoglein 2	-0.652	-1.57135	0.016973
1553105_s_at	Hs2.359784.1	DSG2	desmoglein 2	-0.732	-1.66094	0.007616
232098_at	Hs.287669.0	DST	dystonin	-1.133	-2.19314	0.019003
208430_s_at	g4503406	DTNA	dystrobrevin, alpha	-1.314	-2.4863	0.043756
210736_x_at	g1256014	DTNA	dystrobrevin, alpha	-1.468	-2.76638	0.016973
211493_x_at	g1256010	DTNA	dystrobrevin, alpha	-2.014	-4.03901	0.011937
227084_at	Hs.13522.0	DTNA	dystrobrevin, alpha	-2.056	-4.15832	0.005595
229984_at	Hs.57842.0	DTWD1	DTW domain containing 1	-0.713	-1.63921	0.023055
232429_at	Hs.102981.0	DTWD1	DTW domain containing 1	-1.465	-2.76063	0.003516
235721_at	Hs.48461.0	DTX3	deltex 3, E3 ubiquitin ligase	-1.558	-2.94445	0.007684
225415_at	Hs.16331.0	DTX3L	deltex 3 like, E3 ubiquitin ligase	-0.825	-1.77154	0.038135
212611_at	Hs.62264.0	DTX4	deltex 4, E3 ubiquitin ligase	-1.564	-2.95672	0.012391
215800_at	Hs.272813.2	DUOX1	dual oxidase 1	-0.675	-1.5966	0.043963
227098_at	Hs.128782.0	DUSP18	dual specificity phosphatase 18	-1.184	-2.27206	0.039252
208892_s_at	g13111942	DUSP6	dual specificity phosphatase 6	-0.834	-1.78262	0.03877
208893_s_at	g13477170	DUSP6	dual specificity phosphatase 6	-1.124	-2.1795	0.035078
227730_at	Hs.116976.0	DYM	dymeclin	-0.806	-1.74836	0.021889
204556_s_at	Hs.60177.0	DZIP1	DAZ interacting zinc finger protein 1	-0.664	-1.58447	0.023227
233850_s_at	Hs.274307.1	EBF4	early B-cell factor 4	-1.083	-2.11844	0.000936
226635_at	Hs.94109.1	EBLN3	endogenous Bornavirus-like nucleoprotein 3	-0.938	-1.91587	0.031471
225640_at	Hs.94109.0	EBLN3	endogenous Bornavirus-like nucleoprotein 3	-1.166	-2.24389	0.048454
235305_s_at	Hs.34579.0	ECHDC2	enoyl-CoA hydratase domain containing 2	-0.696	-1.62001	0.011374
218552_at	g8922786	ECHDC2	enoyl-CoA hydratase domain containing 2	-0.922	-1.89474	0.004294
203279_at	g7662001	EDEM1	ER degradation enhancer, mannosidase alpha-like 1	-1.682	-3.20872	0.001057
225275_at	Hs.10283.1	EDIL3	EGF-like repeats and discoidin I-like domains 3	-1.128	-2.18556	0.041731
1558643_s_at	Hs2.435995.1	EDIL3	EGF-like repeats and discoidin I-like domains 3	-1.324	-2.50359	0.010167
207379_at	g5031660	EDIL3	EGF-like repeats and discoidin I-like domains 3	-1.453	-2.73777	0.01363
239477_at	Hs.257224.0	EFHB	EF-hand domain family, member B	-1.11	-2.15846	0.027928
227955_s_at	Hs.288741.0	EFNA5	ephrin-A5	-0.947	-1.92786	0.033401
233814_at	Hs.288741.1	EFNA5	ephrin-A5	-1.01	-2.01391	0.014726
214036_at	Hs.27342.0	EFNA5	ephrin-A5	-1.01	-2.01391	0.014496
205031_at	g4503488	EFNB3	ephrin-B3	-0.682	-1.60436	0.034108
240475_at	Hs.205660.0	EGOT	eosinophil granule ontogeny transcript (non-protein coding)	-0.854	-1.80751	0.005008
231292_at	Hs.170337.0	EID3	EP300 interacting inhibitor of differentiation 3	-1.387	-2.61534	0.022717
212225_at	Hs.150580.2	EIF1	eukaryotic translation initiation factor 1	-0.917	-1.88818	0.01963
201143_s_at	g12803384	EIF2S1	eukaryotic translation initiation factor 2, subunit 1 alpha, 35kDa	-0.836	-1.78509	0.011261
242674_at	Hs.13211.0	EIF4E	eukaryotic translation initiation factor 4E	-1.015	-2.0209	0.019832
224653_at	Hs.5233.0	EIF4EBP2	eukaryotic translation initiation factor 4E binding protein 2	-0.647	-1.56591	0.0251
235289_at	Hs.164144.0	EIF5A2	eukaryotic translation initiation factor 5A2	-0.7	-1.6245	0.010828
210361_s_at	g7677545	ELF2	E74-like factor 2 (ets domain transcription factor)	-0.712	-1.63807	0.04007
203822_s_at	g6857815	ELF2	E74-like factor 2 (ets domain transcription factor)	-0.827	-1.77399	0.019076
226982_at	Hs.173334.0	ELL2	elongation factor, RNA polymerase II, 2	-1.641	-3.11882	0.026712
226502_at	Hs.21857.0	ELMOD2	ELMO/CED-12 domain containing 2	-1.061	-2.08638	0.022717
227491_at	Hs.17519.0	ELOVL6	ELOVL fatty acid elongase 6	-1.908	-3.75288	0.001159
1568777_at	Hs2.410913.1	EML5	echinoderm microtubule associated protein like 5	-1.171	-2.25168	0.014939
1570393_at	Hs2.382601.1	EML5	echinoderm microtubule associated protein like 5	-1.424	-2.68328	0.007743
242785_at	Hs.185155.0	EML6	echinoderm microtubule associated protein like 6	-1.092	-2.13169	0.026882
229656_s_at	Hs.23017.1	EML6	echinoderm microtubule associated protein like 6	-1.225	-2.33755	0.001575
229939_at	Hs.148355.0	ENDOV	endonuclease V	-0.98	-1.97247	0.028388
201313_at	g5803010	ENO2	enolase 2 (gamma, neuronal)	-1.389	-2.61897	0.036991
213645_at	Hs.180433.1	ENOSF1	enolase superfamily member 1	-0.906	-1.87384	0.010514
204845_s_at	g4503574	ENPEP	glutamyl aminopeptidase (aminopeptidase A)	-1.072	-2.10235	0.01813
204844_at	g347892	ENPEP	glutamyl aminopeptidase (aminopeptidase A)	-1.987	-3.96412	4.6e-05
205066_s_at	g13324676	ENPP1	ectonucleotide pyrophosphatase/phosphodiesterase 1	-2.597	-6.05027	0.000347
228952_at	Hs.25557.0	ENPP1	ectonucleotide pyrophosphatase/phosphodiesterase 1	-2.793	-6.93069	0.000747
229088_at	Hs.44238.0	ENPP1	ectonucleotide pyrophosphatase/phosphodiesterase 1	-3.01	-8.05564	0.000537
205065_at	Hs.11951.0	ENPP1	ectonucleotide pyrophosphatase/phosphodiesterase 1	-3.101	-8.58013	0.000366
204161_s_at	g7662357	ENPP4	ectonucleotide pyrophosphatase/phosphodiesterase 4 (putative)	-0.899	-1.86477	0.04808
227803_at	Hs.35198.0	ENPP5	ectonucleotide pyrophosphatase/phosphodiesterase 5 (putative)	-1.448	-2.7283	0.001261
206191_at	g4557424	ENTPD3	ectonucleoside triphosphate diphosphohydrolase 3	-2.262	-4.79656	0.030126
1554094_at	Hs2.80975.2	ENTPD5	ectonucleoside triphosphate diphosphohydrolase 5	-1.176	-2.25949	0.00937
226775_at	Hs.44243.0	ENY2	enhancer of yellow 2 homolog (Drosophila)	-0.712	-1.63807	0.036841
228256_s_at	Hs.12082.1	EPB41L4A	erythrocyte membrane protein band 4.1 like 4A	-0.811	-1.75443	0.014302
220119_at	g11545876	EPB41L4A	erythrocyte membrane protein band 4.1 like 4A	-1.419	-2.674	0.002873
220120_s_at	g11545876	EPB41L4A	erythrocyte membrane protein band 4.1 like 4A	-1.538	-2.90392	0.007599
220161_s_at	g9506568	EPB41L4B	erythrocyte membrane protein band 4.1 like 4B	-0.923	-1.89605	0.008591
201839_s_at	g4505058	EPCAM	epithelial cell adhesion molecule	-1.362	-2.57041	0.016141
239579_at	Hs.201555.0	EPHX4	epoxide hydrolase 4	-1.424	-2.68328	0.032578
218779_x_at	g8923231	EPS8L1	EPS8-like 1	-0.726	-1.65405	0.017325
221665_s_at	g13436193	EPS8L1	EPS8-like 1	-0.816	-1.76052	0.017072
221655_x_at	g9944939	EPS8L1	EPS8-like 1	-1.031	-2.04344	0.001539
91826_at	4919761_RC	EPS8L1	EPS8-like 1	-1.436	-2.7057	0.004051
218180_s_at	g12232452	EPS8L2	EPS8-like 2	-0.979	-1.9711	0.012425
235104_at	Hs.124764.0	ERAP2	endoplasmic reticulum aminopeptidase 2	-0.784	-1.7219	0.031378
227462_at	Hs.23054.0	ERAP2	endoplasmic reticulum aminopeptidase 2	-1.033	-2.04627	0.019605
219759_at	g11641260	ERAP2	endoplasmic reticulum aminopeptidase 2	-1.252	-2.38171	0.010953
213938_at	Hs.7006.0	ERC2	ELKS/RAB6-interacting/CAST family member 2	-1.163	-2.23923	0.00755
228131_at	Hs.25523.0	ERCC1	excision repair cross-complementation group 1	-0.967	-1.95477	0.03154
222603_at	Hs.87128.0	ERMP1	endoplasmic reticulum metallopeptidase 1	-0.801	-1.74231	0.026653
218342_s_at	g13487920	ERMP1	endoplasmic reticulum metallopeptidase 1	-0.915	-1.88557	0.015911
227755_at	Hs.184108.2	ERN1	endoplasmic reticulum to nucleus signaling 1	-1.15	-2.21914	0.004833
225750_at	Hs.10949.0	ERO1A	endoplasmic reticulum oxidoreductase alpha	-0.839	-1.78881	0.01715
222646_s_at	Hs.25740.0	ERO1A	endoplasmic reticulum oxidoreductase alpha	-0.869	-1.8264	0.01816
218498_s_at	g7657068	ERO1A	endoplasmic reticulum oxidoreductase alpha	-0.958	-1.94261	0.007616
225369_at	Hs.173840.0	ESAM	endothelial cell adhesion molecule	-1.458	-2.74727	0.024188
211117_x_at	g4894662	ESR2	estrogen receptor 2 (ER beta)	-0.742	-1.67249	0.028409
1569554_at	Hs2.383242.1	ESR2	estrogen receptor 2 (ER beta)	-0.89	-1.85318	0.040425
221910_at	Hs.10684.0	ETV1	ets variant 1	-1.891	-3.70892	0.043443
225764_at	Hs.146381.2	ETV6	ets variant 6	-0.669	-1.58997	0.031269
229974_at	Hs.87306.0	EVC2	Ellis van Creveld syndrome 2	-1.063	-2.08927	0.00081
204774_at	g7657074	EVI2A	ecotropic viral integration site 2A	-1.289	-2.44359	0.049346
1555808_a_at	Hs2.5457.2	EXD2	exonuclease 3'-5' domain containing 2	-1.777	-3.42713	0.001262
218363_at	g8922630	EXD2	exonuclease 3'-5' domain containing 2	-1.805	-3.49429	0.000259
229131_at	Hs.65797.0	EXD2	exonuclease 3'-5' domain containing 2	-2.106	-4.30496	0.000255
213929_at	Hs.28540.0	EXPH5	exophilin 5	-1.294	-2.45207	0.029566
233996_x_at	Hs.25067.0	EYS	eyes shut homolog (Drosophila)	-0.665	-1.58557	0.043963
203989_x_at	g6031164	F2R	coagulation factor II (thrombin) receptor	-0.741	-1.67133	0.014877
202218_s_at	g4758333	FADS2	fatty acid desaturase 2	-1.036	-2.05053	0.035684
235621_at	Hs.130223.0	FAHD2A	fumarylacetoacetate hydrolase domain containing 2A	-0.638	-1.55617	0.031883
235418_at	Hs.12397.0	FAHD2A	fumarylacetoacetate hydrolase domain containing 2A	-1.152	-2.22222	0.005435
228198_s_at	Hs.8140.0	FAHD2CP	fumarylacetoacetate hydrolase domain containing 2C, pseudogene	-0.686	-1.60882	0.013432
226905_at	Hs.187932.0	FAM101B	family with sequence similarity 101, member B	-1.175	-2.25793	0.00239
226568_at	Hs.141269.0	FAM102B	family with sequence similarity 102, member B	-2.562	-5.90526	0.013147
1553220_at	Hs2.232257.1	FAM117B	family with sequence similarity 117, member B	-1.28	-2.42839	0.049766
219629_at	g8923587	FAM118A	family with sequence similarity 118, member A	-1.219	-2.32785	0.010392
226475_at	Hs.13179.0	FAM118A	family with sequence similarity 118, member A	-1.35	-2.54912	0.003634
239391_at	Hs.37958.0	FAM120AOS	family with sequence similarity 120A opposite strand	-0.898	-1.86348	0.013765
1558761_a_at	Hs2.170408.1	FAM120AOS	family with sequence similarity 120A opposite strand	-1.392	-2.62442	0.017653
227895_at	Hs.2055.1	FAM120B	family with sequence similarity 120B	-0.735	-1.6644	0.023946
226774_at	Hs.46833.0	FAM120B	family with sequence similarity 120B	-1.12	-2.17347	0.002725
230519_at	Hs.292590.0	FAM124A	family with sequence similarity 124 member A	-0.875	-1.83401	0.025505
230067_at	Hs.71913.0	FAM124A	family with sequence similarity 124 member A	-1.042	-2.05908	0.009169
218510_x_at	Hs.82273.0	FAM134B	family with sequence similarity 134, member B	-1.518	-2.86394	0.023272
218532_s_at	g9506660	FAM134B	family with sequence similarity 134, member B	-1.806	-3.49671	0.005413
213663_s_at	Hs.82273.1	FAM134B	family with sequence similarity 134, member B	-1.88	-3.68075	0.018134
202972_s_at	Hs.177664.0	FAM13A	family with sequence similarity 13, member A	-0.869	-1.8264	0.029357
217047_s_at	Hs.177664.1	FAM13A	family with sequence similarity 13, member A	-1.912	-3.7633	0.003483
202973_x_at	g7662375	FAM13A	family with sequence similarity 13, member A	-2.64	-6.23332	0.002663
214889_at	Hs.101735.0	FAM149A	family with sequence similarity 149, member A	-1.221	-2.33108	0.034555
228441_s_at	Hs.119316.1	FAM160A1	family with sequence similarity 160, member A1	-1.559	-2.9465	0.001814
242687_at	Hs.303956.0	FAM160A1	family with sequence similarity 160, member A1	-2.108	-4.31093	0.022827
228440_at	Hs.119316.1	FAM160A1	family with sequence similarity 160, member A1	-2.232	-4.69785	0.005876
1564467_at	Hs2.117964.2	FAM161A	family with sequence similarity 161, member A	-0.825	-1.77154	0.047959
239090_at	Hs.117964.0	FAM161A	family with sequence similarity 161, member A	-1.144	-2.20993	0.010699
228875_at	Hs.126712.0	FAM162B	family with sequence similarity 162, member B	-1.698	-3.24451	0.000303
227029_at	Hs.281434.2	FAM177A1	family with sequence similarity 177, member A1	-0.807	-1.74957	0.035783
213997_at	Hs.7132.0	FAM189A1	family with sequence similarity 189, member A1	-0.72	-1.64718	0.034767
232124_at	Hs.112822.0	FAM198A	family with sequence similarity 198, member A	-1.023	-2.03214	0.039826
227270_at	Hs.309657.0	FAM200B	family with sequence similarity 200, member B	-0.655	-1.57462	0.011263
236321_at	Hs.42124.0	FAM200B	family with sequence similarity 200, member B	-0.809	-1.752	0.005247
233086_at	Hs.119057.0	FAM209A	family with sequence similarity 209, member A	-0.997	-1.99585	0.026439
232662_x_at	Hs.301519.0	FAM213A	family with sequence similarity 213, member A	-1.337	-2.52625	0.000869
225327_at	Hs.29716.0	FAM214A	family with sequence similarity 214, member A	-1.842	-3.58507	0.000144
225146_at	Hs.7961.0	FAM219A	family with sequence similarity 219, member A	-0.9	-1.86607	0.045059
224804_s_at	Hs.10647.0	FAM219B	family with sequence similarity 219, member B	-0.904	-1.87125	0.012647
226873_at	Hs.108887.0	FAM63B	family with sequence similarity 63, member B	-0.787	-1.72548	0.030467
214691_x_at	Hs.40719.0	FAM63B	family with sequence similarity 63, member B	-0.807	-1.74957	0.010468
216044_x_at	Hs.180946.6	FAM69A	family with sequence similarity 69, member A	-0.925	-1.89868	0.004026
213689_x_at	Hs.180946.5	FAM69A	family with sequence similarity 69, member A	-0.954	-1.93724	0.010599
1563900_at	Hs2.381369.1	FAM83B	family with sequence similarity 83, member B	-1.003	-2.00416	0.020634
225864_at	Hs.49136.0	FAM84B	family with sequence similarity 84, member B	-0.725	-1.6529	0.007874
232968_at	Hs.316433.0	FANK1	fibronectin type III and ankyrin repeat domains 1	-1.934	-3.82113	0.000964
219427_at	g13375763	FAT4	FAT atypical cadherin 4	-1.828	-3.55045	0.015207
214436_at	Hs.6092.0	FBXL2	F-box and leucine-rich repeat protein 2	-1.267	-2.40661	0.001386
226842_at	Hs.28893.0	FBXL20	F-box and leucine-rich repeat protein 20	-0.815	-1.7593	0.038948
237036_at	Hs.130774.0	FBXO10	F-box protein 10	-0.8	-1.7411	0.027141
1558062_at	Hs2.88607.1	FBXO10	F-box protein 10	-0.851	-1.80375	0.016048
227222_at	Hs.15669.0	FBXO10	F-box protein 10	-0.936	-1.91322	0.014781
218539_at	g8923650	FBXO34	F-box protein 34	-0.912	-1.88165	0.026298
1559094_at	Hs2.377970.1	FBXO9	F-box protein 9	-0.808	-1.75078	0.020107
1559096_x_at	Hs2.377970.1	FBXO9	F-box protein 9	-0.82	-1.76541	0.019405
232064_at	Hs.118015.0	FER	fer (fps/fes related) tyrosine kinase	-0.659	-1.57899	0.044384
227579_at	Hs.107418.0	FER	fer (fps/fes related) tyrosine kinase	-0.923	-1.89605	0.036065
222245_s_at	Hs.72222.1	FER1L4	fer-1-like family member 4, pseudogene (functional)	-1.858	-3.62505	0.036419
209209_s_at	Hs.75260.0	FERMT2	fermitin family member 2	-0.766	-1.70055	0.007268
207260_at	g8923788	FEV	FEV (ETS oncogene family)	-0.838	-1.78757	0.015316
215000_s_at	Hs.103419.1	FEZ2	fasciculation and elongation protein zeta 2 (zygin II)	-0.644	-1.56266	0.02372
230559_x_at	Hs.124442.0	FGD4	FYVE, RhoGEF and PH domain containing 4	-0.845	-1.79626	0.040432
227271_at	Hs.31339.0	FGF11	fibroblast growth factor 11	-0.974	-1.96428	0.035409
238521_at	Hs.135694.0	FGF12	fibroblast growth factor 12	-2.019	-4.05303	0.013162
223761_at	g5668600	FGF19	fibroblast growth factor 19	-0.654	-1.57352	0.022717
204422_s_at	g4503698	FGF2	fibroblast growth factor 2 (basic)	-0.818	-1.76296	0.048806
204421_s_at	g182562	FGF2	fibroblast growth factor 2 (basic)	-1.025	-2.03496	0.033129
243619_at	Hs.269069.0	FGFR1OP2	FGFR1 oncogene partner 2	-0.703	-1.62789	0.025067
231945_at	Hs.102796.0	FILIP1	filamin A interacting protein 1	-1.332	-2.51751	0.010576
235183_at	Hs.151275.0	FILIP1	filamin A interacting protein 1	-1.814	-3.51616	0.000795
1570515_a_at	Hs2.102796.3	FILIP1	filamin A interacting protein 1	-2.509	-5.69225	0.000303
1556325_at	Hs2.102796.1	FILIP1	filamin A interacting protein 1	-2.751	-6.73184	0.003516
227293_at	Hs.66295.2	FIP1L1	factor interacting with PAPOLA and CPSF1	-0.805	-1.74715	0.018588
224002_s_at	g5410287	FKBP7	FK506 binding protein 7	-1.091	-2.13022	0.00573
223667_at	g5138923	FKBP7	FK506 binding protein 7	-1.263	-2.39994	0.041731
1552664_at	Hs2.172702.2	FLCN	folliculin	-0.959	-1.94396	0.011011
1557466_at	Hs2.406916.1	FLJ31104	uncharacterized LOC441072	-1.395	-2.62989	0.001189
229902_at	Hs.8941.0	FLT4	fms-related tyrosine kinase 4	-0.759	-1.69232	0.04369
205776_at	g4503760	FMO5	flavin containing monooxygenase 5	-0.938	-1.91587	0.005407
240422_at	Hs.116195.0	FMO5	flavin containing monooxygenase 5	-1.329	-2.51228	0.007234
1569688_at	Hs2.382841.1	FMO5	flavin containing monooxygenase 5	-2.667	-6.35107	0.002057
226096_at	Hs.15463.0	FNDC5	fibronectin type III domain containing 5	-0.68	-1.60214	0.018974
218503_at	g8923357	FOCAD	focadhesin	-1.181	-2.26734	0.000894
214312_at	Hs.155651.1	FOXA2	forkhead box A2	-0.84	-1.79005	0.00527
40284_at	4920275	FOXA2	forkhead box A2	-1.659	-3.15798	0.002486
210103_s_at	g4958949	FOXA2	forkhead box A2	-1.697	-3.24226	0.000944
220102_at	g12751476	FOXL2	forkhead box L2	-0.941	-1.91986	0.014781
205022_s_at	g4885136	FOXN3	forkhead box N3	-0.876	-1.83528	0.008071
222494_at	Hs.60548.0	FOXN3	forkhead box N3	-0.913	-1.88296	0.006939
241984_at	Hs.221603.0	FOXN3	forkhead box N3	-0.984	-1.97794	0.025143
218031_s_at	g8924068	FOXN3	forkhead box N3	-1.065	-2.09217	0.007545
220707_s_at	g13376440	FOXRED2	FAD-dependent oxidoreductase domain containing 2	-1.199	-2.2958	0.000795
231846_at	Hs.285932.1	FOXRED2	FAD-dependent oxidoreductase domain containing 2	-1.409	-2.65553	0.002304
238596_at	Hs.225812.0	FRA10AC1	fragile site, folic acid type, rare, fra(10)(q23.3) or fra(10)(q24.2) candidate 1	-0.77	-1.70527	0.020357
226145_s_at	Hs.15420.1	FRAS1	Fraser extracellular matrix complex subunit 1	-2.248	-4.75024	0.008996
230964_at	Hs.15020.0	FREM2	FRAS1 related extracellular matrix protein 2	-2.528	-5.76772	0.000106
241484_x_at	Hs.55179.0	FRG1CP	FSHD region gene 1 family member C, pseudogene	-2.316	-4.9795	0.00217
232140_at	Hs.288925.0	FRG1HP	FSHD region gene 1 family member H, pseudogene	-0.915	-1.88557	0.010608
216134_at	Hs.306390.0	FRMD4B	FERM domain containing 4B	-0.901	-1.86736	0.024879
213056_at	Hs.96427.0	FRMD4B	FERM domain containing 4B	-1.274	-2.41831	0.031199
235960_at	Hs.244639.0	FXR1	fragile X mental retardation, autosomal homolog 1	-0.665	-1.58557	0.020825
218204_s_at	g13470091	FYCO1	FYVE and coiled-coil domain containing 1	-0.674	-1.59549	0.021614
214987_at	Hs.80720.0	GAB1	GRB2-associated binding protein 1	-0.922	-1.89474	0.035143
207112_s_at	g4503850	GAB1	GRB2-associated binding protein 1	-1.01	-2.01391	0.031965
226002_at	Hs.239706.1	GAB1	GRB2-associated binding protein 1	-1.345	-2.5403	0.008426
225998_at	Hs.239706.1	GAB1	GRB2-associated binding protein 1	-1.465	-2.76063	0.010897
229114_at	Hs.27519.0	GAB1	GRB2-associated binding protein 1	-1.637	-3.11018	0.047473
238569_at	Hs.283449.0	GABBR1	gamma-aminobutyric acid (GABA) B receptor, 1	-1.361	-2.56863	0.042717
205278_at	g4503872	GAD1	glutamate decarboxylase 1	-1.447	-2.72641	0.03486
219815_at	g13375869	GAL3ST4	galactose-3-O-sulfotransferase 4	-2.011	-4.03062	0.001325
230417_at	Hs.21035.0	GALNT16	polypeptide N-acetylgalactosaminyltransferase 16	-0.961	-1.94666	0.015847
230418_s_at	Hs.21035.0	GALNT16	polypeptide N-acetylgalactosaminyltransferase 16	-1.485	-2.79917	0.003019
204921_at	g4503916	GAS8	growth arrest-specific 8	-0.836	-1.78509	0.004154
231451_s_at	Hs.119316.0	GATB	glutamyl-tRNA(Gln) amidotransferase, subunit B	-1.803	-3.48945	0.001242
231686_at	Hs.75335.1	GATM	glycine amidinotransferase (L-arginine:glycine amidinotransferase)	-1.606	-3.04407	0.01467
203178_at	g4503932	GATM	glycine amidinotransferase (L-arginine:glycine amidinotransferase)	-2.122	-4.35297	0.003122
216733_s_at	Hs.75335.3	GATM	glycine amidinotransferase (L-arginine:glycine amidinotransferase)	-2.207	-4.61714	0.008344
1553971_a_at	Hs2.351547.1	GATS	GATS, stromal antigen 3 opposite strand	-2.005	-4.01389	0.006195
225906_at	Hs.4947.1	GATSL2	GATS protein-like 2	-0.695	-1.61888	0.008644
223434_at	g12052883	GBP3	guanylate binding protein 3	-1.594	-3.01885	0.035422
203765_at	g6912387	GCA	grancalcin, EF-hand calcium binding protein	-3.194	-9.15145	0.004111
204224_s_at	g4503948	GCH1	GTP cyclohydrolase 1	-2.191	-4.56622	0.011223
230788_at	Hs.116346.0	GCNT2	glucosaminyl (N-acetyl) transferase 2, I-branching enzyme (I blood group)	-2.693	-6.46657	0.00135
220831_at	g7706126	GCNT4	glucosaminyl (N-acetyl) transferase 4, core 2	-1.152	-2.22222	0.010468
1554154_at	Hs2.29493.2	GDAP2	ganglioside induced differentiation associated protein 2	-1.487	-2.80305	0.001633
219473_at	g8923142	GDAP2	ganglioside induced differentiation associated protein 2	-1.61	-3.05252	0.000144
1560227_at	Hs2.406957.2	GDPD1	glycerophosphodiester phosphodiesterase domain containing 1	-0.747	-1.6783	0.036976
1555606_a_at	Hs2.406957.1	GDPD1	glycerophosphodiester phosphodiesterase domain containing 1	-0.787	-1.72548	0.011864
238681_at	Hs.153485.0	GDPD1	glycerophosphodiester phosphodiesterase domain containing 1	-1.785	-3.44618	0.002088
219722_s_at	g13236539	GDPD3	glycerophosphodiester phosphodiesterase domain containing 3	-0.988	-1.98343	0.019095
205063_at	g4506960	GEMIN2	gem nuclear organelle associated protein 2	-0.764	-1.69819	0.035379
211114_x_at	g9650994	GEMIN2	gem nuclear organelle associated protein 2	-0.798	-1.73869	0.003701
210779_x_at	g9650992	GEMIN2	gem nuclear organelle associated protein 2	-0.813	-1.75686	0.004561
211115_x_at	g9650996	GEMIN2	gem nuclear organelle associated protein 2	-0.898	-1.86348	0.003492
227159_at	Hs.38039.0	GHDC	GH3 domain containing	-1.099	-2.14206	0.002486
1570125_at	Hs2.385573.1	GHET1	gastric carcinoma proliferation enhancing transcript 1	-0.644	-1.56266	0.029357
204836_at	g4504012	GLDC	glycine dehydrogenase (decarboxylating)	-1.841	-3.58258	0.001382
230360_at	Hs.30484.0	GLDN	gliomedin	-2.753	-6.74117	0.000131
1555874_x_at	Hs2.121001.4	GLIDR	glioblastoma down-regulated RNA	-1.438	-2.70945	0.00418
228040_at	Hs.121001.0	GLIDR	glioblastoma down-regulated RNA	-1.468	-2.76638	0.003332
225602_at	Hs.75544.1	GLIPR2	GLI pathogenesis-related 2	-0.779	-1.71594	0.032485
229435_at	Hs.293854.0	GLIS3	GLIS family zinc finger 3	-1.35	-2.54912	0.002555
230258_at	Hs.107924.0	GLIS3	GLIS family zinc finger 3	-1.45	-2.73208	0.00058
206662_at	g4504024	GLRX	glutaredoxin	-1.298	-2.45888	0.023039
209276_s_at	g5442445	GLRX	glutaredoxin	-1.319	-2.49493	0.021518
223080_at	Hs.239189.1	GLS	glutaminase	-1.314	-2.4863	0.010917
226177_at	Hs.3593.0	GLTP	glycolipid transfer protein	-0.859	-1.81378	0.02656
1554712_a_at	Hs2.254271.2	GLYATL2	glycine-N-acyltransferase-like 2	-0.754	-1.68646	0.040897
201179_s_at	g183183	GNAI3	guanine nucleotide binding protein (G protein), alpha inhibiting activity polypeptide 3	-1.041	-2.05765	0.004917
201180_s_at	g183224	GNAI3	guanine nucleotide binding protein (G protein), alpha inhibiting activity polypeptide 3	-1.075	-2.10672	0.002919
201181_at	g5729849	GNAI3	guanine nucleotide binding protein (G protein), alpha inhibiting activity polypeptide 3	-1.102	-2.14652	0.039595
210604_at	g12652948	GNAT2	guanine nucleotide binding protein (G protein), alpha transducing activity polypeptide 2	-1.049	-2.0691	0.025454
242404_at	Hs.40937.0	GNB5	guanine nucleotide binding protein (G protein), beta 5	-2.893	-7.42813	0.000465
224965_at	Hs.289026.1	GNG2	guanine nucleotide binding protein (G protein), gamma 2	-1.644	-3.12531	0.038878
224964_s_at	Hs.289026.1	GNG2	guanine nucleotide binding protein (G protein), gamma 2	-2.477	-5.56739	0.025693
1566513_a_at	Hs2.117183.2	GNG4	guanine nucleotide binding protein (G protein), gamma 4	-1.525	-2.87787	0.017495
1555867_at	Hs2.117183.1	GNG4	guanine nucleotide binding protein (G protein), gamma 4	-2.375	-5.18736	0.001975
232611_at	Hs.159385.0	GOLGA2P5	golgin A2 pseudogene 5	-1.241	-2.36362	0.00593
233198_at	Hs.171096.0	GOLGA2P5	golgin A2 pseudogene 5	-1.258	-2.39164	0.009552
208797_s_at	Hs.182982.0	GOLGA8A	golgin A8 family, member A	-1.214	-2.3198	0.020129
213737_x_at	Hs.205125.0	GOLGA8N	golgin A8 family, member N	-1.327	-2.5088	0.001608
201056_at	Hs.7844.0	GOLGB1	golgin B1	-0.767	-1.70173	0.030433
218361_at	g8922588	GOLPH3L	golgi phosphoprotein 3-like	-0.963	-1.94936	0.039501
219720_s_at	g11034828	GPATCH2L	G-patch domain containing 2 like	-0.834	-1.78262	0.031942
235302_at	Hs.290870.0	GPATCH2L	G-patch domain containing 2 like	-0.895	-1.85961	0.008426
239478_x_at	Hs.169812.0	GPATCH2L	G-patch domain containing 2 like	-1.015	-2.0209	0.008347
229297_at	Hs.44656.0	GPATCH2L	G-patch domain containing 2 like	-1.41	-2.65737	0.001258
223319_at	g8926307	GPHN	gephyrin	-0.698	-1.62225	0.010468
209469_at	Hs.75819.0	GPM6A	glycoprotein M6A	-0.78	-1.71713	0.008655
239533_at	Hs.143209.0	GPR155	G protein-coupled receptor 155	-1.092	-2.13169	0.045896
231166_at	Hs.127196.0	GPR155	G protein-coupled receptor 155	-1.583	-2.99592	0.017565
207183_at	g5453665	GPR19	G protein-coupled receptor 19	-1.811	-3.50885	0.001323
1556697_at	Hs2.164104.1	GPRIN3	GPRIN family member 3	-1.118	-2.17046	0.048778
1556698_a_at	Hs2.164104.1	GPRIN3	GPRIN family member 3	-1.483	-2.79529	0.032366
221922_at	Hs.93121.1	GPSM2	G-protein signaling modulator 2	-1.083	-2.11844	0.004261
205240_at	g9558734	GPSM2	G-protein signaling modulator 2	-1.558	-2.94445	0.005431
233058_at	Hs.171714.0	GPSM2	G-protein signaling modulator 2	-1.806	-3.49671	0.000191
230002_at	Hs.93121.2	GPSM2	G-protein signaling modulator 2	-1.892	-3.71149	0.00135
239595_at	Hs.233364.0	GPX2	glutathione peroxidase 2	-1.757	-3.37995	0.021452
229616_s_at	Hs.114727.1	GRAMD2	GRAM domain containing 2	-1.306	-2.47255	0.021314
218706_s_at	Hs.235445.0	GRAMD3	GRAM domain containing 3	-1.197	-2.29262	0.001578
212856_at	Hs.95180.0	GRAMD4	GRAM domain containing 4	-0.701	-1.62563	0.019605
205862_at	g7662187	GREB1	growth regulation by estrogen in breast cancer 1	-0.885	-1.84676	0.026848
238663_x_at	Hs.31677.0	GRIA4	glutamate receptor, ionotropic, AMPA 4	-0.71	-1.6358	0.02713
235957_at	Hs.107708.0	GRIP1	glutamate receptor interacting protein 1	-1.414	-2.66475	0.00527
230277_at	Hs.115659.1	GS1-259H13.2	transmembrane protein 225-like	-0.903	-1.86995	0.024417
213142_x_at	Hs.12969.0	GSAP	gamma-secretase activating protein	-2.902	-7.47462	1.7e-05
222150_s_at	Hs.12969.1	GSAP	gamma-secretase activating protein	-3.011	-8.06123	1.1e-05
219233_s_at	g8924175	GSDMB	gasdermin B	-1.537	-2.9019	0.003206
212056_at	Hs.75909.0	GSE1	Gse1 coiled-coil protein	-1.042	-2.05908	0.027228
235405_at	Hs.113517.0	GSTA4	glutathione S-transferase alpha 4	-1.875	-3.66802	0.019782
204550_x_at	g10835126	GSTM1	glutathione S-transferase mu 1	-1.505	-2.83825	0.004926
215333_x_at	Hs.301961.2	GSTM1	glutathione S-transferase mu 1	-1.619	-3.07162	0.002614
204418_x_at	g4504174	GSTM2	glutathione S-transferase mu 2 (muscle)	-1.667	-3.17554	0.000997
202554_s_at	Hs.2006.0	GSTM3	glutathione S-transferase mu 3 (brain)	-1.364	-2.57398	0.010473
235867_at	Hs.299087.0	GSTM3	glutathione S-transferase mu 3 (brain)	-2.78	-6.86852	0.000302
204149_s_at	g4504178	GSTM4	glutathione S-transferase mu 4	-1.518	-2.86394	0.025335
210912_x_at	g183662	GSTM4	glutathione S-transferase mu 4	-2.476	-5.56353	0.002036
239390_at	Hs.159460.0	GTDC1	glycosyltransferase like domain containing 1	-0.779	-1.71594	0.038651
238585_at	Hs.187506.0	GTDC1	glycosyltransferase like domain containing 1	-0.79	-1.72907	0.016973
232905_at	Hs.47193.0	GTF2H5	general transcription factor IIH subunit 5	-0.744	-1.67481	0.016101
244294_at	Hs.21530.0	GTF2H5	general transcription factor IIH subunit 5	-0.905	-1.87254	0.005564
1558934_a_at	Hs2.200680.1	GTF2H5	general transcription factor IIH subunit 5	-1.552	-2.93223	0.01813
228765_at	Hs.326447.0	GTF2IRD2	GTF2I repeat domain containing 2	-1.385	-2.61172	0.015016
223789_s_at	g7959755	GTPBP2	GTP binding protein 2	-0.679	-1.60103	0.01301
221050_s_at	g9506762	GTPBP2	GTP binding protein 2	-0.9	-1.86607	0.015507
223788_at	g7959755	GTPBP2	GTP binding protein 2	-1.238	-2.35871	0.004111
1556742_at	Hs2.333304.1	GUSBP1	glucuronidase, beta pseudogene 1	-1.157	-2.22993	0.021052
220936_s_at	g8922757	H2AFJ	H2A histone family, member J	-0.954	-1.93724	0.009429
228213_at	Hs.36727.2	H2AFJ	H2A histone family, member J	-1.065	-2.09217	0.044611
218445_at	g8923919	H2AFY2	H2A histone family, member Y2	-1.526	-2.87986	0.010699
236939_at	Hs.87787.0	HACD4	3-hydroxyacyl-CoA dehydratase 4	-0.672	-1.59328	0.042832
228601_at	Hs.93574.1	HAGLR	HOXD antisense growth-associated long non-coding RNA	-1.556	-2.94037	0.01954
202957_at	g4885404	HCLS1	hematopoietic cell-specific Lyn substrate 1	-0.641	-1.55941	0.039415
223345_at	g8118720	HDAC8	histone deacetylase 8	-0.806	-1.74836	0.031955
205659_at	g7662279	HDAC9	histone deacetylase 9	-1.221	-2.33108	0.008737
1553646_at	Hs2.350885.1	HDX	highly divergent homeobox	-2.293	-4.90074	1.7e-05
224481_s_at	g13623274	HECTD1	HECT domain containing E3 ubiquitin protein ligase 1	-0.789	-1.72788	0.010637
241955_at	Hs.314346.0	HECTD1	HECT domain containing E3 ubiquitin protein ligase 1	-0.929	-1.90396	0.009606
241683_at	Hs.322848.0	HECTD1	HECT domain containing E3 ubiquitin protein ligase 1	-0.934	-1.91057	0.014343
1557100_s_at	Hs2.421481.1	HECTD1	HECT domain containing E3 ubiquitin protein ligase 1	-0.98	-1.97247	0.007587
243163_at	Hs.153661.0	HECW1	HECT, C2 and WW domain containing E3 ubiquitin protein ligase 1	-1.106	-2.15248	0.004713
219352_at	g8923589	HERC6	HECT and RLD domain containing E3 ubiquitin protein ligase family member 6	-1.857	-3.62254	0.006067
217168_s_at	Hs.146393.1	HERPUD1	homocysteine-inducible, endoplasmic reticulum stress-inducible, ubiquitin-like domain member 1	-0.655	-1.57462	0.015487
203395_s_at	g8400709	HES1	hes family bHLH transcription factor 1	-0.764	-1.69819	0.021726
203394_s_at	Hs.250666.0	HES1	hes family bHLH transcription factor 1	-1.158	-2.23148	0.035614
210755_at	g1378041	HGF	hepatocyte growth factor (hepapoietin A; scatter factor)	-1.07	-2.09943	0.012091
225981_at	Hs.11067.0	HID1	HID1 domain containing	-0.764	-1.69819	0.005241
244593_at	Hs.323816.0	HID1	HID1 domain containing	-2.069	-4.19596	0.00179
200989_at	g4504384	HIF1A	hypoxia inducible factor 1, alpha subunit (basic helix-loop-helix transcription factor)	-1.213	-2.31819	0.013081
226364_at	Hs.38489.0	HIP1	huntingtin interacting protein 1	-0.945	-1.92519	0.020675
205425_at	g12545385	HIP1	huntingtin interacting protein 1	-1.023	-2.03214	0.022038
1552516_a_at	Hs2.12259.1	HIPK1	homeodomain interacting protein kinase 1	-1.165	-2.24233	0.009075
212293_at	Hs.12259.0	HIPK1	homeodomain interacting protein kinase 1	-1.261	-2.39662	0.001143
212291_at	Hs.12259.0	HIPK1	homeodomain interacting protein kinase 1	-1.564	-2.95672	0.002615
207156_at	g10800131	HIST1H2AG	histone cluster 1, H2ag	-0.978	-1.96973	0.043796
239041_at	Hs.158088.0	HIST1H2AK	histone cluster 1, H2ak	-1.42	-2.67586	0.01477
236193_at	Hs.146228.0	HIST1H2BC	histone cluster 1, H2bc	-1.476	-2.78176	0.007736
209911_x_at	g12803984	HIST1H2BD	histone cluster 1, H2bd	-1.187	-2.27679	0.022595
221582_at	g12654706	HIST3H2A	histone cluster 3, H2a	-0.955	-1.93858	0.024662
243254_at	Hs.169541.0	HIVEP2	human immunodeficiency virus type I enhancer binding protein 2	-1.127	-2.18404	0.007962
212642_s_at	Hs.75063.0	HIVEP2	human immunodeficiency virus type I enhancer binding protein 2	-1.243	-2.3669	0.000643
212641_at	Hs.75063.0	HIVEP2	human immunodeficiency virus type I enhancer binding protein 2	-1.25	-2.37841	0.000651
209140_x_at	g804748	HLA-B	major histocompatibility complex, class I, B	-0.922	-1.89474	0.015016
214459_x_at	Hs.274485.0	HLA-C	major histocompatibility complex, class I, C	-0.66	-1.58008	0.027025
216526_x_at	Hs.277477.2	HLA-C	major histocompatibility complex, class I, C	-0.67	-1.59107	0.020233
208812_x_at	g13325360	HLA-C	major histocompatibility complex, class I, C	-0.684	-1.60659	0.018134
212998_x_at	Hs.73931.3	HLA-DQB1	major histocompatibility complex, class II, DQ beta 1	-0.689	-1.61217	0.043905
209480_at	g188397	HLA-DQB1	major histocompatibility complex, class II, DQ beta 1	-1.672	-3.18656	0.007808
200904_at	Hs.181392.0	HLA-E	major histocompatibility complex, class I, E	-0.829	-1.77645	0.012389
240110_at	Hs.143969.0	HMGCS2	3-hydroxy-3-methylglutaryl-CoA synthase 2 (mitochondrial)	-0.899	-1.86477	0.02701
213359_at	Hs.303627.5	HNRNPD	heterogeneous nuclear ribonucleoprotein D	-1.355	-2.55797	0.005597
231868_at	Hs.156051.0	HOMEZ	homeobox and leucine zipper encoding	-1.972	-3.92312	0.002752
205600_x_at	Hs.22554.0	HOXB5	homeobox B5	-0.886	-1.84805	0.045699
205601_s_at	g4504468	HOXB5	homeobox B5	-1.002	-2.00277	0.022583
205365_at	Hs.98428.0	HOXB6	homeobox B6	-0.983	-1.97657	0.030405
216973_s_at	Hs.819.1	HOXB7	homeobox B7	-0.705	-1.63014	0.037561
229667_s_at	Hs.183274.0	HOXB8	homeobox B8	-1.421	-2.67771	0.031229
226461_at	Hs.86327.0	HOXB9	homeobox B9	-0.66	-1.58008	0.029145
216417_x_at	Hs.287809.0	HOXB9	homeobox B9	-1.172	-2.25324	0.029504
205975_s_at	g13375631	HOXD1	homeobox D1	-1.658	-3.15579	0.013576
211548_s_at	g1203981	HPGD	hydroxyprostaglandin dehydrogenase 15-(NAD)	-0.761	-1.69466	0.049804
203913_s_at	Hs.77348.0	HPGD	hydroxyprostaglandin dehydrogenase 15-(NAD)	-0.766	-1.70055	0.02065
222881_at	g5880862	HPSE	heparanase	-1.705	-3.26029	0.000844
232275_s_at	Hs.137140.0	HS6ST3	heparan sulfate 6-O-sulfotransferase 3	-0.82	-1.76541	0.031858
217989_at	g7705904	HSD17B11	hydroxysteroid (17-beta) dehydrogenase 11	-0.731	-1.65979	0.025236
1559152_at	Hs2.213741.1	HSPA1B	heat shock 70kDa protein 1B	-0.986	-1.98069	0.023031
211538_s_at	g4204879	HSPA2	heat shock 70kDa protein 2	-1.626	-3.08656	0.005537
219284_at	g13375820	HSPBAP1	HSPB (heat shock 27kDa) associated protein 1	-0.75	-1.68179	0.045152
210547_x_at	g437366	ICA1	islet cell autoantigen 1	-0.804	-1.74594	0.047295
230639_at	Hs.144405.0	ICA1	islet cell autoantigen 1	-0.906	-1.87384	0.015298
202637_s_at	Hs.168383.0	ICAM1	intercellular adhesion molecule 1	-2.879	-7.3564	0.001184
215485_s_at	Hs.168383.1	ICAM1	intercellular adhesion molecule 1	-3.363	-10.2888	0.000286
202638_s_at	g4557877	ICAM1	intercellular adhesion molecule 1	-3.927	-15.2105	0.000269
201610_at	Hs.183212.0	ICMT	isoprenylcysteine carboxyl methyltransferase	-1.877	-3.6731	0.019342
213450_s_at	Hs.14155.2	ICOSLG	inducible T-cell co-stimulator ligand	-0.948	-1.9292	0.011405
242956_at	Hs.270622.0	IDH1	isocitrate dehydrogenase 1 (NADP+)	-1.517	-2.86195	0.004683
227865_at	Hs.103158.0	IDNK	idnK, gluconokinase homolog (E. coli)	-1.498	-2.82451	0.004947
202438_x_at	Hs.172458.0	IDS	iduronate 2-sulfatase	-1.017	-2.02371	0.019622
236823_at	Hs.6795.0	IDS	iduronate 2-sulfatase	-1.481	-2.79142	0.020395
208965_s_at	Hs.155530.1	IFI16	interferon, gamma-inducible protein 16	-0.999	-1.99861	0.037561
208966_x_at	g6644296	IFI16	interferon, gamma-inducible protein 16	-1.043	-2.06051	0.02269
206332_s_at	g5031778	IFI16	interferon, gamma-inducible protein 16	-1.061	-2.08638	0.016516
223626_x_at	g11493981	IFI27L2	interferon, alpha-inducible protein 27-like 2	-0.675	-1.5966	0.033144
1555464_at	Hs2Affx.1.318	IFIH1	interferon induced, with helicase C domain 1	-1.106	-2.15248	0.015389
219209_at	g11545921	IFIH1	interferon induced, with helicase C domain 1	-1.611	-3.05463	0.002394
214022_s_at	Hs.146360.1	IFITM1	interferon induced transmembrane protein 1	-1.674	-3.19098	0.005038
213784_at	Hs.50267.1	IFT27	intraflagellar transport 27	-0.717	-1.64376	0.021405
240251_at	Hs.259452.0	IFT80	intraflagellar transport 80	-0.783	-1.72071	0.008211
226098_at	Hs.186547.0	IFT80	intraflagellar transport 80	-1.069	-2.09798	0.027601
1558956_s_at	Hs2.407402.1	IFT80	intraflagellar transport 80	-1.073	-2.1038	0.021726
219372_at	g7661539	IFT81	intraflagellar transport 81	-0.958	-1.94261	0.049155
227870_at	Hs.20924.0	IGDCC4	immunoglobulin superfamily, DCC subclass, member 4	-1.153	-2.22376	0.007844
243358_at	Hs.104679.0	IGF1R	insulin-like growth factor 1 receptor	-0.743	-1.67365	0.04007
227760_at	Hs.21400.0	IGFBPL1	insulin like growth factor binding protein-like 1	-6.736	-106.595	9.7e-05
216706_x_at	Hs.123017.0	IGHD3-16	immunoglobulin heavy diversity 3-16	-0.875	-1.83401	0.005758
1556579_s_at	Hs2.386296.1	IGSF10	immunoglobulin superfamily, member 10	-1.16	-2.23457	0.047826
1552672_a_at	Hs2.81234.1	IGSF3	immunoglobulin superfamily, member 3	-2.171	-4.50335	0.000271
202421_at	Hs.81234.0	IGSF3	immunoglobulin superfamily, member 3	-2.444	-5.44148	0.000618
206172_at	g10834991	IL13RA2	interleukin 13 receptor, alpha 2	-2.331	-5.03154	0.024362
219255_x_at	g8923816	IL17RB	interleukin 17 receptor B	-1.185	-2.27363	0.01728
224156_x_at	g9246434	IL17RB	interleukin 17 receptor B	-1.451	-2.73397	0.007442
227997_at	Hs.8817.0	IL17RD	interleukin 17 receptor D	-1.605	-3.04196	0.008311
206618_at	g4504654	IL18R1	interleukin 18 receptor 1	-1.571	-2.97111	0.002503
210118_s_at	g186277	IL1A	interleukin 1 alpha	-1.968	-3.91225	0.001897
39402_at	4881243_RC	IL1B	interleukin 1 beta	-2.116	-4.3349	0.017722
205067_at	g10835144	IL1B	interleukin 1 beta	-2.126	-4.36506	0.030614
1553032_at	Hs2.351813.1	IL31RA	interleukin 31 receptor A	-1.239	-2.36035	0.013149
1555431_a_at	Hs2.351813.2	IL31RA	interleukin 31 receptor A	-1.729	-3.31498	0.010329
243541_at	Hs.55378.0	IL31RA	interleukin 31 receptor A	-1.812	-3.51129	0.008596
234967_at	Hs.283974.0	IL6ST	interleukin 6 signal transducer	-0.939	-1.9172	0.028351
234474_x_at	Hs.283974.0	IL6ST	interleukin 6 signal transducer	-0.986	-1.98069	0.0488
207054_at	g6631089	IMPG1	interphotoreceptor matrix proteoglycan 1	-1.001	-2.00139	0.00573
214705_at	Hs.321197.2	INADL	InaD-like (Drosophila)	-0.672	-1.59328	0.03625
223681_s_at	g11933154	INADL	InaD-like (Drosophila)	-1.61	-3.05252	0.017299
202794_at	g4755138	INPP1	inositol polyphosphate-1-phosphatase	-0.654	-1.57352	0.037437
209566_at	Hs.7089.0	INSIG2	insulin induced gene 2	-0.802	-1.74352	0.015308
226212_s_at	Hs.208334.0	INSR	insulin receptor	-0.719	-1.64604	0.005337
226216_at	Hs.208334.0	INSR	insulin receptor	-0.952	-1.93455	0.012425
213792_s_at	Hs.89695.2	INSR	insulin receptor	-0.964	-1.95071	0.001097
226450_at	Hs.98401.0	INSR	insulin receptor	-1.241	-2.36362	0.00802
228946_at	Hs.27056.0	INTU	inturned planar cell polarity protein	-0.803	-1.74473	0.03293
218192_at	g7705552	IP6K2	inositol hexakisphosphate kinase 2	-0.831	-1.77892	0.010637
238584_at	Hs.171077.0	IQCA1	IQ motif containing with AAA domain 1	-0.75	-1.68179	0.03942
221185_s_at	g13376682	IQCG	IQ motif containing G	-0.938	-1.91587	0.015382
224165_s_at	g13508443	IQCH	IQ motif containing H	-1.468	-2.76638	0.015982
1553740_a_at	Hs2.249175.1	IRAK2	interleukin 1 receptor associated kinase 2	-0.729	-1.65749	0.007537
231779_at	Hs.249175.0	IRAK2	interleukin 1 receptor associated kinase 2	-1.69	-3.22657	0.007507
203882_at	g5174474	IRF9	interferon regulatory factor 9	-1.113	-2.16295	0.003952
220225_at	g7705554	IRX4	iroquois homeobox 4	-1.267	-2.40661	0.001188
222240_s_at	Hs.33713.2	ISYNA1	inositol-3-phosphate synthase 1	-1.337	-2.52625	0.000659
233335_at	Hs.56027.0	ITGA11	integrin alpha 11	-0.867	-1.82387	0.029626
210184_at	g487829	ITGAX	integrin alpha X	-1.081	-2.1155	0.015992
201124_at	Hs.149846.0	ITGB5	integrin beta 5	-1.203	-2.30218	0.010914
216944_s_at	Hs.198443.2	ITPR1	inositol 1,4,5-trisphosphate receptor, type 1	-1.254	-2.38502	0.013957
211323_s_at	g1464750	ITPR1	inositol 1,4,5-trisphosphate receptor, type 1	-1.477	-2.78369	0.002817
203710_at	g10835022	ITPR1	inositol 1,4,5-trisphosphate receptor, type 1	-1.496	-2.8206	0.00688
202661_at	Hs.238272.0	ITPR2	inositol 1,4,5-trisphosphate receptor, type 2	-1.077	-2.10964	0.009314
202662_s_at	g4504792	ITPR2	inositol 1,4,5-trisphosphate receptor, type 2	-1.396	-2.63171	0.003885
209907_s_at	g7329075	ITSN2	intersectin 2	-0.7	-1.6245	0.032119
218517_at	g13376356	JADE1	jade family PHD finger 1	-0.677	-1.59881	0.038255
225820_at	Hs.12420.0	JADE1	jade family PHD finger 1	-0.842	-1.79253	0.049009
1562031_at	Hs2.438487.1	JAK2	Janus kinase 2	-1.373	-2.59009	0.014317
205841_at	g13325062	JAK2	Janus kinase 2	-1.623	-3.08015	0.002171
205842_s_at	g3236321	JAK2	Janus kinase 2	-1.727	-3.31039	0.025166
238600_at	Hs.101672.0	JAKMIP1	janus kinase and microtubule interacting protein 1	-1.382	-2.60629	0.012743
205889_s_at	g7662177	JAKMIP2	janus kinase and microtubule interacting protein 2	-0.804	-1.74594	0.031583
205888_s_at	Hs.43107.0	JAKMIP2	janus kinase and microtubule interacting protein 2	-1.965	-3.90413	0.009359
233076_at	Hs.106254.0	JAKMIP3	Janus kinase and microtubule interacting protein 3	-0.864	-1.82008	0.016456
224933_s_at	Hs.6685.0	JMJD1C	jumonji domain containing 1C	-0.639	-1.55725	0.027901
221763_at	Hs.6685.0	JMJD1C	jumonji domain containing 1C	-0.839	-1.78881	0.013601
228793_at	Hs.6685.1	JMJD1C	jumonji domain containing 1C	-0.998	-1.99723	0.048603
201473_at	g4504808	JUNB	jun B proto-oncogene	-0.721	-1.64832	0.04121
203752_s_at	g10938013	JUND	jun D proto-oncogene	-1.116	-2.16745	0.010989
201015_s_at	g12056467	JUP	junction plakoglobin	-1.087	-2.12432	0.041206
230596_at	Hs.13281.0	KALRN	kalirin, RhoGEF kinase	-1.017	-2.02371	0.00605
205635_at	g4504334	KALRN	kalirin, RhoGEF kinase	-1.252	-2.38171	0.025056
227750_at	Hs.162189.1	KALRN	kalirin, RhoGEF kinase	-1.556	-2.94037	0.003233
1554791_a_at	Hs2.380669.2	KANSL1L	KAT8 regulatory NSL complex subunit 1 like	-1.534	-2.89588	0.025826
208564_at	g4826781	KCNA2	potassium channel, voltage gated shaker related subfamily A, member 2	-0.776	-1.71238	0.027259
239118_at	Hs.6921.0	KCNA2	potassium channel, voltage gated shaker related subfamily A, member 2	-1.52	-2.86791	0.006606
210079_x_at	g762887	KCNAB1	potassium channel, voltage gated subfamily A regulatory beta subunit 1	-0.809	-1.752	0.019687
240869_at	Hs.224829.0	KCNB1	potassium channel, voltage gated Shab related subfamily B, member 1	-0.709	-1.63467	0.018455
217637_at	Hs.224829.1	KCNB1	potassium channel, voltage gated Shab related subfamily B, member 1	-0.833	-1.78139	0.007537
208123_at	g13242171	KCNB2	potassium channel, voltage gated Shab related subfamily B, member 2	-1.365	-2.57576	0.014393
215014_at	Hs.232127.0	KCND3	potassium channel, voltage gated Shal related subfamily D, member 3	-0.853	-1.80625	0.011639
211827_s_at	g6007796	KCND3	potassium channel, voltage gated Shal related subfamily D, member 3	-1.272	-2.41496	0.000864
213832_at	Hs.23729.0	KCND3	potassium channel, voltage gated Shal related subfamily D, member 3	-2.182	-4.53782	0.001184
205303_at	Hs.102308.0	KCNJ8	potassium channel, inwardly rectifying subfamily J, member 8	-3.133	-8.77257	3.3e-05
205304_s_at	g4826801	KCNJ8	potassium channel, inwardly rectifying subfamily J, member 8	-3.657	-12.6144	0.000133
231230_at	Hs.135614.0	KCNK10	potassium channel, two pore domain subfamily K, member 10	-2.098	-4.28115	0.020978
220727_at	g10863960	KCNK10	potassium channel, two pore domain subfamily K, member 10	-2.248	-4.75024	0.001828
221583_s_at	Hs.89463.0	KCNMA1	potassium channel, calcium activated large conductance subfamily M alpha, member 1	-0.785	-1.72309	0.024522
221584_s_at	g7914977	KCNMA1	potassium channel, calcium activated large conductance subfamily M alpha, member 1	-0.933	-1.90924	0.01975
244455_at	Hs.277901.0	KCNT2	potassium channel, sodium activated subfamily T, member 2	-4.433	-21.6006	0.000738
223176_at	g13277575	KCTD20	potassium channel tetramerization domain containing 20	-0.73	-1.65864	0.02461
229873_at	Hs.8974.0	KCTD21	potassium channel tetramerization domain containing 21	-0.933	-1.90924	0.038541
213474_at	Hs.119683.0	KCTD7	potassium channel tetramerization domain containing 7	-0.88	-1.84038	0.028388
209984_at	g10567163	KDM4C	lysine (K)-specific demethylase 4C	-1.199	-2.2958	0.020744
239207_at	Hs.96899.0	KDM5C	lysine (K)-specific demethylase 5C	-0.789	-1.72788	0.016017
213146_at	Hs.103915.0	KDM6B	lysine (K)-specific demethylase 6B	-0.746	-1.67714	0.01124
212355_at	Hs.7911.0	KHNYN	KH and NYN domain containing	-1.012	-2.0167	0.014045
238659_at	Hs.92418.0	KIAA0141	KIAA0141	-1.322	-2.50012	0.046041
203288_at	g7662075	KIAA0355	KIAA0355	-1.16	-2.23457	0.013233
213424_at	Hs.6224.0	KIAA0895	KIAA0895	-2.676	-6.39082	0.002486
212421_at	Hs.13255.0	KIAA0930	KIAA0930	-0.932	-1.90792	0.047335
233227_at	Hs.272255.0	KIAA1109	KIAA1109	-0.835	-1.78386	0.031926
216294_s_at	Hs.6606.2	KIAA1109	KIAA1109	-0.903	-1.86995	0.013957
1553793_a_at	Hs2.6606.1	KIAA1109	KIAA1109	-0.991	-1.98756	0.006
214929_s_at	Hs.6606.1	KIAA1109	KIAA1109	-1.012	-2.0167	0.014025
223162_s_at	g7959912	KIAA1147	KIAA1147	-1.064	-2.09072	0.009214
227230_s_at	Hs.205293.0	KIAA1211	KIAA1211	-1.691	-3.2288	0.023233
1554438_at	Hs2.149377.1	KIAA1217	KIAA1217	-1.065	-2.09217	0.041205
231807_at	Hs.149377.0	KIAA1217	KIAA1217	-1.901	-3.73472	0.018512
1562966_at	Hs2.149377.6	KIAA1217	KIAA1217	-1.924	-3.79474	0.005121
244317_at	Hs.31570.1	KIAA1324L	KIAA1324-like	-0.663	-1.58337	0.041895
228349_at	Hs.36676.0	KIAA1958	KIAA1958	-1.816	-3.52104	0.004635
228446_at	Hs.124344.0	KIAA2026	KIAA2026	-0.696	-1.62001	0.007229
238477_at	Hs.152372.0	KIF1C	kinesin family member 1C	-0.758	-1.69114	0.021774
204411_at	g8922142	KIF21B	kinesin family member 21B	-1.147	-2.21453	0.037814
232514_at	Hs.201603.1	KIF27	kinesin family member 27	-1.46	-2.75108	0.020479
203129_s_at	Hs.6641.0	KIF5C	kinesin family member 5C	-0.914	-1.88426	0.005254
203130_s_at	g4758649	KIF5C	kinesin family member 5C	-1.166	-2.24389	0.001745
213656_s_at	Hs.274440.0	KLC1	kinesin light chain 1	-0.957	-1.94127	0.015383
225390_s_at	Hs.7104.3	KLF13	Kruppel-like factor 13	-0.91	-1.87905	0.012037
219371_s_at	g7706468	KLF2	Kruppel-like factor 2	-0.94	-1.91853	0.02717
226646_at	Hs.107740.1	KLF2	Kruppel-like factor 2	-1.424	-2.68328	0.00135
225133_at	Hs.94881.0	KLF3	Kruppel-like factor 3 (basic)	-0.672	-1.59328	0.023232
1552733_at	Hs2.335887.1	KLHDC1	kelch domain containing 1	-2.374	-5.18376	0.004374
49329_at	4920776_RC	KLHL22	kelch-like family member 22	-0.879	-1.8391	0.019753
221986_s_at	Hs.246875.1	KLHL24	kelch-like family member 24	-3.262	-9.59312	0.048306
235727_at	Hs.44445.0	KLHL28	kelch-like family member 28	-1.033	-2.04627	0.029314
233866_at	Hs.272239.3	KLHL5	kelch-like family member 5	-0.834	-1.78262	0.030906
223250_at	g13276694	KLHL7	kelch-like family member 7	-1.556	-2.94037	0.026848
213233_s_at	Hs.106283.3	KLHL9	kelch-like family member 9	-0.706	-1.63127	0.015822
213117_at	Hs.106283.1	KLHL9	kelch-like family member 9	-0.862	-1.81756	0.029523
233197_at	Hs.175681.0	KLHL9	kelch-like family member 9	-1.187	-2.27679	0.0361
1558533_at	Hs2.304604.1	KRBA2	KRAB-A domain containing 2	-0.779	-1.71594	0.019076
222585_x_at	Hs.5721.0	KRCC1	lysine-rich coiled-coil 1	-1.714	-3.28069	0.012772
233329_s_at	Hs.5721.1	KRCC1	lysine-rich coiled-coil 1	-1.91	-3.75809	0.002663
218303_x_at	g7706155	KRCC1	lysine-rich coiled-coil 1	-1.94	-3.83706	0.002048
235252_at	Hs.169061.0	KSR1	kinase suppressor of ras 1	-0.937	-1.91454	0.035712
220089_at	g13376330	L2HGDH	L-2-hydroxyglutarate dehydrogenase	-0.785	-1.72309	0.025826
206822_s_at	g7661701	L3MBTL1	l(3)mbt-like 1 (Drosophila)	-0.823	-1.76908	0.048209
213837_at	Hs.278516.1	L3MBTL1	l(3)mbt-like 1 (Drosophila)	-0.977	-1.96837	0.028784
210306_at	g3811110	L3MBTL1	l(3)mbt-like 1 (Drosophila)	-1.035	-2.04911	0.045264
1553141_at	Hs2.210586.1	LACC1	laccase (multicopper oxidoreductase) domain containing 1	-1.169	-2.24856	0.01515
1552490_at	Hs2.164285.1	LACE1	lactation elevated 1	-0.956	-1.93992	0.004086
1560078_at	Hs2.151169.1	LAMA3	laminin, alpha 3	-0.637	-1.55509	0.014119
234719_at	Hs.306719.0	LAMA3	laminin, alpha 3	-0.727	-1.65519	0.019076
1563772_a_at	Hs2.151169.2	LAMA3	laminin, alpha 3	-1.587	-3.00424	0.00217
203726_s_at	g4557710	LAMA3	laminin, alpha 3	-2.13	-4.37717	0.003186
210150_s_at	g13097167	LAMA5	laminin, alpha 5	-1.223	-2.33432	0.003972
205569_at	g7657660	LAMP3	lysosomal-associated membrane protein 3	-1.154	-2.2253	0.046419
202299_s_at	g5454169	LAMTOR5	late endosomal/lysosomal adaptor, MAPK and MTOR activator 5	-0.909	-1.87774	0.045896
202300_at	g5454169	LAMTOR5	late endosomal/lysosomal adaptor, MAPK and MTOR activator 5	-1.048	-2.06766	0.043733
243856_at	Hs.160366.0	LANCL3	LanC lantibiotic synthetase component C-like 3 (bacterial)	-0.746	-1.67714	0.017902
215543_s_at	Hs.25220.1	LARGE	like-glycosyltransferase	-0.681	-1.60325	0.025136
233764_s_at	Hs.151973.1	LARP1B	La ribonucleoprotein domain family, member 1B	-0.896	-1.8609	0.006526
231824_at	Hs.151973.2	LARP1B	La ribonucleoprotein domain family, member 1B	-1.558	-2.94445	0.018428
242153_at	Hs.220943.0	LARP1B	La ribonucleoprotein domain family, member 1B	-1.942	-3.84238	0.000933
1559105_at	Hs2.98625.1	LEKR1	leucine, glutamate and lysine rich 1	-1.162	-2.23767	0.023267
207255_at	g4504978	LEPR	leptin receptor	-0.777	-1.71356	0.033458
209894_at	g3236285	LEPR	leptin receptor	-1.894	-3.71664	0.000476
211355_x_at	g1279904	LEPR	leptin receptor	-2.032	-4.08971	0.000608
211356_x_at	g1519389	LEPR	leptin receptor	-2.034	-4.09539	0.001441
211354_s_at	g1279902	LEPR	leptin receptor	-2.05	-4.14106	0.001215
208949_s_at	g12654570	LGALS3	lectin, galactoside-binding, soluble, 3	-1.101	-2.14503	0.005351
228422_at	Hs.56782.0	LHFPL4	lipoma HMGIC fusion partner-like 4	-0.893	-1.85703	0.020148
205266_at	g6006018	LIF	leukemia inhibitory factor	-3.326	-10.0283	8.4e-05
222456_s_at	Hs.10706.0	LIMA1	LIM domain and actin binding 1	-1.441	-2.71509	0.010765
206440_at	g4759305	LIN7A	lin-7 homolog A (C. elegans)	-1.632	-3.09942	0.01251
227929_at	Hs.22545.0	LIN7A	lin-7 homolog A (C. elegans)	-1.907	-3.75028	0.000746
240027_at	Hs.144333.0	LIN7A	lin-7 homolog A (C. elegans)	-2.223	-4.66863	0.004455
241652_x_at	Hs.144333.1	LIN7A	lin-7 homolog A (C. elegans)	-2.241	-4.72725	0.009187
203245_s_at	g12803888	LINC00094	long intergenic non-protein coding RNA 94	-0.888	-1.85061	0.010694
1558425_x_at	Hs2.402743.1	LINC00265	long intergenic non-protein coding RNA 265	-0.863	-1.81882	0.014522
1558423_at	Hs2.402743.1	LINC00265	long intergenic non-protein coding RNA 265	-1.036	-2.05053	0.01963
240068_at	Hs.106234.0	LINC00323	long intergenic non-protein coding RNA 323	-2.112	-4.3229	0.001207
1561691_at	Hs2.407549.1	LINC00326	long intergenic non-protein coding RNA 326	-3.73	-13.2691	0.002
213703_at	Hs.79732.4	LINC00342	long intergenic non-protein coding RNA 342	-1.999	-3.99723	0.023826
239799_at	Hs.179153.0	LINC00476	long intergenic non-protein coding RNA 476	-1.573	-2.97523	0.010415
1554517_x_at	Hs2.348341.1	LINC00537	long intergenic non-protein coding RNA 537	-0.704	-1.62902	0.040268
1554516_at	Hs2.348341.1	LINC00537	long intergenic non-protein coding RNA 537	-0.758	-1.69114	0.039583
232034_at	Hs.175563.0	LINC00537	long intergenic non-protein coding RNA 537	-1.576	-2.98142	0.00367
1558404_at	Hs2.265131.1	LINC00622	long intergenic non-protein coding RNA 622	-3.387	-10.4614	5.4e-05
229429_x_at	Hs.295901.4	LINC00623	long intergenic non-protein coding RNA 623	-1.084	-2.11991	0.039306
235191_at	Hs.17805.1	LINC00662	long intergenic non-protein coding RNA 662	-1.052	-2.0734	0.033922
1560390_s_at	Hs2.255021.2	LINC00663	long intergenic non-protein coding RNA 663	-0.716	-1.64262	0.028336
1555363_s_at	Hs2.255021.1	LINC00663	long intergenic non-protein coding RNA 663	-0.786	-1.72429	0.048209
225055_at	Hs.190488.1	LINC00674	long intergenic non-protein coding RNA 674	-0.744	-1.67481	0.044559
228275_at	Hs.144759.0	LINC00888	long intergenic non-protein coding RNA 888	-0.947	-1.92786	0.042925
236798_at	Hs.122113.0	LINC00888	long intergenic non-protein coding RNA 888	-1.203	-2.30218	0.035429
1556304_s_at	Hs2.169942.1	LINC00899	long intergenic non-protein coding RNA 899	-0.895	-1.85961	0.024587
232088_x_at	Hs.46537.0	LINC00899	long intergenic non-protein coding RNA 899	-2.195	-4.5789	0.000869
226924_at	Hs.61508.0	LINC00909	long intergenic non-protein coding RNA 909	-1.079	-2.11257	0.046827
229363_at	Hs.113069.0	LINC00920	long intergenic non-protein coding RNA 920	-1.087	-2.12432	0.015308
1560573_at	Hs2.380357.1	LINC00944	long intergenic non-protein coding RNA 944	-1.402	-2.64268	0.001502
1559827_at	Hs2.379809.1	LINC00960	long intergenic non-protein coding RNA 960	-1.852	-3.61	0.008373
1557293_at	Hs2.337635.1	LINC00969	long intergenic non-protein coding RNA 969	-0.923	-1.89605	0.013917
228564_at	Hs.42792.0	LINC01116	long intergenic non-protein coding RNA 1116	-1.195	-2.28945	0.011456
1556033_at	Hs2.378769.1	LINC01138	long intergenic non-protein coding RNA 1138	-1.212	-2.31659	0.006108
236198_at	Hs.124554.0	LINC01215	long intergenic non-protein coding RNA 1215	-1.647	-3.13182	0.024614
1557570_a_at	Hs2.275398.1	LINC01305	long intergenic non-protein coding RNA 1305	-1.429	-2.6926	0.007573
1564413_at	Hs2.396985.1	LINC01356	long intergenic non-protein coding RNA 1356	-1.096	-2.13761	0.004022
1559835_at	Hs2.351215.1	LINC01410	long intergenic non-protein coding RNA 1410	-2.685	-6.43081	0.000387
1559725_at	Hs2.376950.1	LINC01537	long intergenic non-protein coding RNA 1537	-0.796	-1.73628	0.032193
243686_at	Hs.27041.0	LINGO2	leucine rich repeat and Ig domain containing 2	-1.844	-3.59004	0.009607
232720_at	Hs.26239.0	LINGO2	leucine rich repeat and Ig domain containing 2	-2.586	-6.00432	0.005596
239284_at	Hs.174387.0	LL0XNC01-250H12.3	uncharacterized LOC100506901	-0.659	-1.57899	0.013763
229611_at	Hs.90363.0	LMLN	leishmanolysin-like (metallopeptidase M8 family)	-0.671	-1.59218	0.029844
1553284_s_at	Hs2.432613.1	LMLN	leishmanolysin-like (metallopeptidase M8 family)	-0.828	-1.77522	0.036691
244881_at	Hs.116298.0	LMLN	leishmanolysin-like (metallopeptidase M8 family)	-1.019	-2.02651	0.031564
238037_at	Hs.222127.0	LMLN	leishmanolysin-like (metallopeptidase M8 family)	-1.119	-2.17196	0.033731
241922_at	Hs.155639.0	LMO4	LIM domain only 4	-1.117	-2.16895	0.035255
223611_s_at	Hs.66295.1	LNX1	ligand of numb-protein X 1, E3 ubiquitin protein ligase	-1.148	-2.21606	0.033756
243957_at	Hs.104864.0	LOC100128108	putative ubiquitin-conjugating enzyme E2Q2-like protein	-0.803	-1.74473	0.011711
1565722_at	Hs2.364699.1	LOC100128281	uncharacterized LOC100128281	-0.939	-1.9172	0.012165
1559045_at	Hs2.378090.1	LOC100128288	uncharacterized LOC100128288	-3.027	-8.15113	0.000665
1565549_at	Hs2.333470.1	LOC100128988	uncharacterized LOC100128988	-3.406	-10.6001	0.000286
240868_at	Hs.271432.0	LOC100129406	uncharacterized LOC100129406	-1.023	-2.03214	0.013149
229699_at	Hs.61558.0	LOC100129550	uncharacterized LOC100129550	-1.999	-3.99723	0.000427
1559528_at	Hs2.350851.1	LOC100129917	uncharacterized LOC100129917	-1.303	-2.46741	0.008083
215421_at	Hs.66163.0	LOC100131510	uncharacterized LOC100131510	-0.768	-1.70291	0.024077
224519_at	g13623636	LOC100132167	uncharacterized LOC100132167	-1.01	-2.01391	0.010657
229685_at	Hs.50186.0	LOC100134937	uncharacterized LOC100134937	-1.281	-2.43007	0.025307
229722_at	Hs.87329.1	LOC100270804	uncharacterized LOC100270804	-1.043	-2.06051	0.026336
1556444_a_at	Hs2.60681.1	LOC100288310	uncharacterized LOC100288310	-3.065	-8.36868	0.000727
230641_at	Hs.144405.0	LOC100505938	uncharacterized LOC100505938	-1.514	-2.85601	0.010035
1560038_at	Hs2.377466.1	LOC100506071	uncharacterized LOC100506071	-2.315	-4.97605	0.002185
1565837_at	Hs2.200260.1	LOC100506411	uncharacterized LOC100506411	-2.228	-4.68484	0.000266
240255_at	Hs.197793.0	LOC100507395	uncharacterized LOC100507395	-0.769	-1.70409	0.035694
241353_s_at	Hs.160874.1	LOC100507507	uncharacterized LOC100507507	-1.253	-2.38337	0.010479
1568892_at	Hs2.382067.1	LOC100996251	uncharacterized LOC100996251	-1.092	-2.13169	0.030182
1556639_at	Hs2.96940.1	LOC100996455	uncharacterized LOC100996455	-0.92	-1.89212	0.045757
232615_at	Hs.163986.0	LOC100996741	uncharacterized LOC100996741	-0.798	-1.73869	0.007493
243441_at	Hs.189364.0	LOC101060400	uncharacterized LOC101060400	-0.721	-1.64832	0.013419
228620_at	Hs.18571.2	LOC101927027	uncharacterized LOC101927027	-0.986	-1.98069	0.027203
237105_at	Hs.130595.0	LOC101927027	uncharacterized LOC101927027	-1.035	-2.04911	0.024475
237883_at	Hs.124173.0	LOC101927098	uncharacterized LOC101927098	-2.108	-4.31093	0.014563
237771_s_at	Hs.125978.0	LOC101927305	uncharacterized LOC101927305	-2.503	-5.66863	0.000303
1560132_a_at	Hs2.120590.1	LOC101927432	uncharacterized LOC101927432	-1.872	-3.6604	0.008665
242873_at	Hs.311389.0	LOC101928100	uncharacterized LOC101928100	-0.749	-1.68063	0.018413
1569339_s_at	Hs2.371751.1	LOC101928123	uncharacterized LOC101928123	-0.971	-1.9602	0.038771
1569338_at	Hs2.371751.1	LOC101928123	uncharacterized LOC101928123	-1.43	-2.69447	0.048075
1559009_at	Hs2.369832.1	LOC101928504	uncharacterized LOC101928504	-0.735	-1.6644	0.047167
1561553_at	Hs2.398153.1	LOC101929147	uncharacterized LOC101929147	-3.529	-11.5434	0.000612
1562474_at	Hs2.386380.1	LOC101929147	uncharacterized LOC101929147	-3.9	-14.9285	2e-06
244864_at	Hs.169977.0	LOC101929475	uncharacterized LOC101929475	-0.939	-1.9172	0.033482
1568899_at	Hs2.147682.1	LOC101929511	uncharacterized LOC101929511	-1.229	-2.34404	0.022325
236704_at	Hs.94116.0	LOC101929787	uncharacterized LOC101929787	-2.095	-4.27226	0.001189
236170_x_at	Hs.134071.0	LOC101930085	uncharacterized LOC101930085	-0.805	-1.74715	0.029654
232589_at	Hs.122810.1	LOC102606465	uncharacterized LOC102606465	-1.156	-2.22839	0.028784
244270_at	Hs.153351.0	LOC102723809	uncharacterized LOC102723809	-0.854	-1.80751	0.045384
238620_at	Hs.116502.0	LOC102724275	uncharacterized LOC102724275	-0.86	-1.81504	0.015165
242860_at	Hs.131684.0	LOC102724418	uncharacterized LOC102724418	-1.371	-2.5865	0.001382
1559952_x_at	Hs2.429718.1	LOC102725108	uncharacterized LOC102725108	-1.023	-2.03214	0.006953
1559950_at	Hs2.429718.1	LOC102725108	uncharacterized LOC102725108	-1.269	-2.40994	0.00443
236103_at	Hs.120547.0	LOC102725126	uncharacterized LOC102725126	-1.37	-2.58471	0.018468
237173_at	Hs.132689.0	LOC105369199	putative neuroblastoma breakpoint family member 6-like protein	-1.584	-2.998	0.004457
243923_at	Hs.88447.0	LOC105370606	uncharacterized LOC105370606	-1.669	-3.17994	0.023227
1556216_s_at	Hs2.348751.1	LOC105370687	uncharacterized LOC105370687	-1.426	-2.68701	0.019802
236856_x_at	Hs.98539.0	LOC105371220	uncharacterized LOC105371220	-1.499	-2.82647	0.00532
236453_at	Hs.121276.0	LOC105372733	uncharacterized LOC105372733	-2.465	-5.52127	0.0244
238934_at	Hs.98838.0	LOC105373754	uncharacterized LOC105373754	-1.035	-2.04911	0.006939
1561432_at	Hs2.434298.1	LOC105374419	uncharacterized LOC105374419	-0.653	-1.57243	0.012431
236278_at	Hs.293557.0	LOC105374984	uncharacterized LOC105374984	-1.849	-3.6025	0.018468
1560758_at	Hs2.9887.1	LOC105376703	uncharacterized LOC105376703	-1.097	-2.13909	0.009075
1557383_a_at	Hs2.212617.1	LOC105376896	uncharacterized LOC105376896	-2.351	-5.10178	0.002718
239025_at	Hs.127343.0	LOC105379448	uncharacterized LOC105379448	-1.375	-2.59368	0.019062
1560463_at	Hs2.10726.1	LOC105379477	uncharacterized LOC105379477	-0.869	-1.8264	0.00573
1558529_s_at	Hs2.367706.1	LOC105379555	uncharacterized LOC105379555	-1.004	-2.00555	0.027874
1562048_at	Hs2.376768.1	LOC152225	uncharacterized LOC152225	-0.952	-1.93455	0.015176
232794_at	Hs.165175.0	LOC153682	uncharacterized LOC153682	-2.526	-5.75973	0.0143
227868_at	Hs.34455.0	LOC154761	family with sequence similarity 115, member C pseudogene	-1.795	-3.47015	0.001235
213776_at	Hs.27371.0	LOC157562	uncharacterized LOC157562	-1.577	-2.98349	0.026577
220609_at	g13375896	LOC202181	SUMO-interacting motifs containing 1 pseudogene	-0.82	-1.76541	0.027266
1557628_s_at	Hs2.368035.1	LOC283745	uncharacterized LOC283745	-1.231	-2.3473	0.001751
1558109_x_at	Hs2.438645.1	LOC283788	FSHD region gene 1 pseudogene	-0.956	-1.93992	0.0361
229187_at	Hs.124946.0	LOC283788	FSHD region gene 1 pseudogene	-1.215	-2.32141	0.00615
229007_at	Hs.43143.0	LOC283788	FSHD region gene 1 pseudogene	-1.939	-3.8344	0.002989
1554520_at	Hs2.192155.1	LOC283861	uncharacterized LOC283861	-1.093	-2.13317	0.021776
238096_at	Hs.207699.0	LOC284023	uncharacterized LOC284023	-1.065	-2.09217	0.00555
1557607_at	Hs2.274864.1	LOC284080	uncharacterized LOC284080	-1.137	-2.19923	0.014367
1557608_a_at	Hs2.274864.1	LOC284080	uncharacterized LOC284080	-1.191	-2.28311	0.016995
233737_s_at	Hs.141441.0	LOC284561	uncharacterized LOC284561	-1.531	-2.88986	0.030789
232689_at	Hs.141441.1	LOC284561	uncharacterized LOC284561	-1.688	-3.2221	0.032855
1556474_a_at	Hs2.134090.1	LOC285097	uncharacterized FLJ38379	-0.93	-1.90528	0.009966
236166_at	Hs.153460.0	LOC285147	uncharacterized LOC285147	-1.458	-2.74727	0.006471
242852_at	Hs.22657.0	LOC285147	uncharacterized LOC285147	-1.496	-2.8206	0.019832
232504_at	Hs.157752.0	LOC285628	MIR146A host gene	-2.158	-4.46296	0.011016
238790_at	Hs.156100.0	LOC374443	C-type lectin domain family 2, member D pseudogene	-0.917	-1.88818	0.028157
240572_s_at	Hs.156100.1	LOC374443	C-type lectin domain family 2, member D pseudogene	-1.127	-2.18404	0.021674
235284_s_at	Hs.164675.0	LOC388692	uncharacterized LOC388692	-0.987	-1.98206	0.014243
232346_at	Hs.271249.0	LOC388692	uncharacterized LOC388692	-1.044	-2.06194	0.004101
1556255_a_at	Hs2.182850.1	LOC400756	uncharacterized LOC400756	-1.103	-2.14801	0.01363
233732_at	Hs.306460.0	LOC401320	uncharacterized LOC401320	-0.659	-1.57899	0.046542
1563781_at	Hs2.437156.1	LOC401320	uncharacterized LOC401320	-0.986	-1.98069	0.010754
238540_at	Hs.28846.1	LOC401320	uncharacterized LOC401320	-1.052	-2.0734	0.010415
1558459_s_at	Hs2.436135.1	LOC401320	uncharacterized LOC401320	-1.095	-2.13613	0.014979
239313_at	Hs.28846.0	LOC401320	uncharacterized LOC401320	-1.34	-2.53151	0.03112
1558859_at	Hs2.334661.1	LOC401320	uncharacterized LOC401320	-1.387	-2.61534	0.005596
232897_at	Hs.285336.0	LOC403323	uncharacterized LOC403323	-1.266	-2.40494	0.002292
226995_at	Hs.170144.1	LOC642852	uncharacterized LOC642852	-1.684	-3.21318	0.004068
228909_at	Hs.170144.0	LOC642852	uncharacterized LOC642852	-1.75	-3.36359	0.0018
228908_s_at	Hs.170144.0	LOC642852	uncharacterized LOC642852	-1.877	-3.6731	0.007084
1559957_a_at	Hs2.271450.1	LOC642852	uncharacterized LOC642852	-1.977	-3.93674	0.004699
228412_at	Hs.26973.0	LOC643072	uncharacterized LOC643072	-1.044	-2.06194	0.010839
1561761_x_at	Hs2.193696.1	LOC645513	uncharacterized LOC645513	-1.022	-2.03073	0.004532
242305_at	Hs.189869.0	LOC645513	uncharacterized LOC645513	-1.164	-2.24078	0.00603
1561760_s_at	Hs2.193696.1	LOC645513	uncharacterized LOC645513	-1.215	-2.32141	0.01477
1561759_at	Hs2.193696.1	LOC645513	uncharacterized LOC645513	-1.87	-3.65533	0.001242
1556257_at	Hs2.169657.1	LOC645513	uncharacterized LOC645513	-2.325	-5.01066	0.048225
238715_at	Hs.117853.0	LOC646014	uncharacterized LOC646014	-0.677	-1.59881	0.013254
243452_at	Hs.121245.0	LOC646778	uncharacterized LOC646778	-0.763	-1.69702	0.034625
1569453_a_at	Hs2.128454.2	LOC692247	uncharacterized LOC692247	-1.836	-3.57019	0.007124
227383_at	Hs.36475.0	LOC727820	uncharacterized LOC727820	-0.831	-1.77892	0.013404
229283_at	Hs.73251.0	LOC728613	programmed cell death 6 pseudogene	-1.011	-2.01531	0.048549
240518_at	Hs.44545.0	LOC729291	uncharacterized LOC729291	-0.633	-1.55079	0.044744
1570572_at	Hs2.399785.1	LOC729291	uncharacterized LOC729291	-0.839	-1.78881	0.02814
235691_at	Hs.297988.0	LOC729970	hCG2028352-like	-1.579	-2.98763	0.037495
233830_at	Hs.287582.0	LOC90246	uncharacterized LOC90246	-1.58	-2.9897	0.023267
215446_s_at	Hs.102267.3	LOX	lysyl oxidase	-1.665	-3.17114	0.009075
204298_s_at	g4505008	LOX	lysyl oxidase	-1.894	-3.71664	0.013362
1570219_at	Hs2.382048.1	LOXL4	lysyl oxidase-like 4	-0.644	-1.56266	0.036027
206723_s_at	g2735848	LPAR2	lysophosphatidic acid receptor 2	-1.227	-2.3408	0.007227
206960_at	g4885310	LPAR4	lysophosphatidic acid receptor 4	-1.105	-2.15099	0.001647
212274_at	Hs.81412.0	LPIN1	lipin 1	-1.476	-2.78176	0.046041
212276_at	Hs.81412.0	LPIN1	lipin 1	-1.544	-2.91602	0.028318
212692_s_at	Hs.62354.0	LRBA	LPS-responsive vesicle trafficking, beach and anchor containing	-0.9	-1.86607	0.003725
214109_at	Hs.62354.1	LRBA	LPS-responsive vesicle trafficking, beach and anchor containing	-0.978	-1.96973	0.007226
1553668_at	Hs2.289038.1	LRCH3	leucine-rich repeats and calponin homology (CH) domain containing 3	-0.801	-1.74231	0.002675
220235_s_at	g8922961	LRIF1	ligand dependent nuclear receptor interacting factor 1	-1.249	-2.37677	0.005337
242164_s_at	Hs.309305.0	LRIG2	leucine-rich repeats and immunoglobulin-like domains 2	-1.29	-2.44528	0.00784
205953_at	g7662319	LRIG2	leucine-rich repeats and immunoglobulin-like domains 2	-1.465	-2.76063	0.002807
201412_at	g13027587	LRP10	LDL receptor related protein 10	-0.752	-1.68413	0.027248
227252_at	Hs.28368.0	LRP10	LDL receptor related protein 10	-1.97	-3.91768	0.003864
231861_at	Hs.289071.0	LRP10	LDL receptor related protein 10	-2.193	-4.57255	0.000722
239471_at	Hs.256157.0	LRRC28	leucine rich repeat containing 28	-1.184	-2.27206	0.007611
221740_x_at	Hs.190488.5	LRRC37A2	leucine rich repeat containing 37, member A2	-0.895	-1.85961	0.033458
229962_at	Hs.190488.6	LRRC37A3	leucine rich repeat containing 37, member A3	-1.298	-2.45888	0.004511
206483_at	g7106436	LRRC6	leucine rich repeat containing 6	-1.195	-2.28945	0.011132
236587_at	Hs.112033.0	LRRC6	leucine rich repeat containing 6	-1.215	-2.32141	0.005337
228064_at	Hs.113314.0	LRRC75B	leucine rich repeat containing 75B	-0.99	-1.98618	0.041666
226884_at	Hs.126085.0	LRRN1	leucine rich repeat neuronal 1	-2.316	-4.9795	0.007431
221612_at	g9963844	LRTM1	leucine-rich repeats and transmembrane domains 1	-0.662	-1.58227	0.006121
211018_at	g1019365	LSS	lanosterol synthase (2,3-oxidosqualene-lanosterol cyclase)	-1.063	-2.08927	0.018116
236172_at	Hs.158186.0	LTB4R	leukotriene B4 receptor	-1.126	-2.18253	0.002858
227989_at	Hs.85087.3	LTBP4	latent transforming growth factor beta binding protein 4	-0.648	-1.56699	0.009648
1557067_s_at	Hs2.398171.1	LUC7L	LUC7-like	-1.09	-2.12874	0.013532
1557066_at	Hs2.398171.1	LUC7L	LUC7-like	-1.179	-2.2642	0.027484
218729_at	g9910395	LXN	latexin	-1.492	-2.81279	0.010283
206584_at	g7662503	LY96	lymphocyte antigen 96	-1.364	-2.57398	0.007542
237553_at	Hs.174746.0	LZTFL1	leucine zipper transcription factor like 1	-0.737	-1.66671	0.045199
218437_s_at	g9966792	LZTFL1	leucine zipper transcription factor like 1	-1.207	-2.30857	0.010596
219894_at	g9506924	MAGEL2	MAGE family member L2	-1.665	-3.17114	0.001377
232859_s_at	Hs.21610.1	MAGI1	membrane associated guanylate kinase, WW and PDZ domain containing 1	-0.828	-1.77522	0.025968
225474_at	Hs.21610.0	MAGI1	membrane associated guanylate kinase, WW and PDZ domain containing 1	-0.967	-1.95477	0.003895
225465_at	Hs.21610.0	MAGI1	membrane associated guanylate kinase, WW and PDZ domain containing 1	-1.006	-2.00834	0.007249
226770_at	Hs.49169.2	MAGI3	membrane associated guanylate kinase, WW and PDZ domain containing 3	-1.984	-3.95588	0.0078
224307_x_at	g12003993	MAGI3	membrane associated guanylate kinase, WW and PDZ domain containing 3	-2.194	-4.57572	0.001382
204777_s_at	g12408666	MAL	mal, T-cell differentiation protein	-1.027	-2.03778	0.00769
224558_s_at	Hs.6975.2	MALAT1	metastasis associated lung adenocarcinoma transcript 1 (non-protein coding)	-0.674	-1.59549	0.011892
223940_x_at	g11493549	MALAT1	metastasis associated lung adenocarcinoma transcript 1 (non-protein coding)	-0.71	-1.6358	0.00805
224559_at	Hs.42346.3	MALAT1	metastasis associated lung adenocarcinoma transcript 1 (non-protein coding)	-0.993	-1.99032	0.014452
235457_at	Hs.112472.0	MAML2	mastermind-like transcriptional coactivator 2	-1.104	-2.1495	0.042791
242794_at	Hs.177135.0	MAML3	mastermind-like transcriptional coactivator 3	-1.92	-3.78423	0.00562
217920_at	Hs.239114.0	MAN1A2	mannosidase, alpha, class 1A, member 2	-1.359	-2.56507	0.047831
1552481_s_at	Hs2.367638.1	MAN1A2	mannosidase, alpha, class 1A, member 2	-1.503	-2.83431	0.031484
217922_at	Hs.239114.0	MAN1A2	mannosidase, alpha, class 1A, member 2	-1.642	-3.12098	0.011192
226538_at	Hs.63368.0	MAN2A1	mannosidase, alpha, class 2A, member 1	-0.726	-1.65405	0.026955
235103_at	Hs.204295.0	MAN2A1	mannosidase, alpha, class 2A, member 1	-0.783	-1.72071	0.025968
219999_at	g8924129	MAN2A2	mannosidase, alpha, class 2A, member 2	-1.099	-2.14206	0.047644
203778_at	g5174522	MANBA	mannosidase, beta A, lysosomal	-0.913	-1.88296	0.002831
1554193_s_at	Hs2.46903.2	MANEA	mannosidase, endo-alpha	-0.845	-1.79626	0.032635
220945_x_at	g8922334	MANSC1	MANSC domain containing 1	-1.943	-3.84504	0.007032
204041_at	g4505092	MAOB	monoamine oxidase B	-0.846	-1.79751	0.003477
225540_at	Hs.169387.1	MAP2	microtubule associated protein 2	-1.802	-3.48703	0.004632
203265_s_at	Hs.75217.0	MAP2K4	mitogen-activated protein kinase kinase 4	-0.786	-1.72429	0.019197
227131_at	Hs.25227.0	MAP3K3	mitogen-activated protein kinase kinase kinase 3	-0.729	-1.65749	0.035281
235421_at	Hs.122431.0	MAP3K8	mitogen-activated protein kinase kinase kinase 8	-1.022	-2.03073	0.03048
205027_s_at	g4885146	MAP3K8	mitogen-activated protein kinase kinase kinase 8	-1.842	-3.58507	0.000387
213927_at	Hs.170267.0	MAP3K9	mitogen-activated protein kinase kinase kinase 9	-2.279	-4.85341	0.003607
218181_s_at	g8923351	MAP4K4	mitogen-activated protein kinase kinase kinase kinase 4	-0.676	-1.5977	0.038878
206571_s_at	g4758523	MAP4K4	mitogen-activated protein kinase kinase kinase kinase 4	-0.734	-1.66324	0.043447
222547_at	Hs.6631.0	MAP4K4	mitogen-activated protein kinase kinase kinase kinase 4	-0.791	-1.73027	0.012789
203552_at	Hs.246970.0	MAP4K5	mitogen-activated protein kinase kinase kinase kinase 5	-1.008	-2.01112	0.001752
203553_s_at	g5729890	MAP4K5	mitogen-activated protein kinase kinase kinase kinase 5	-1.198	-2.29421	0.000811
211081_s_at	g405730	MAP4K5	mitogen-activated protein kinase kinase kinase kinase 5	-1.331	-2.51577	0.003462
241980_at	Hs.107453.0	MAP6	microtubule associated protein 6	-0.953	-1.93589	0.025327
211499_s_at	g2316011	MAPK11	mitogen-activated protein kinase 11	-0.823	-1.76908	0.026338
206106_at	Hs.55039.0	MAPK12	mitogen-activated protein kinase 12	-0.704	-1.62902	0.008773
215512_at	Hs.20141.1	MARCH6	membrane associated ring finger 6	-0.963	-1.94936	0.026305
235141_at	Hs.124740.0	MARVELD2	MARVEL domain containing 2	-0.74	-1.67018	0.022001
209332_s_at	g13097617	MAX	MYC associated factor X	-0.655	-1.57462	0.042559
208403_x_at	g4505114	MAX	MYC associated factor X	-0.707	-1.63241	0.018155
210734_x_at	g187390	MAX	MYC associated factor X	-0.717	-1.64376	0.029389
227839_at	Hs.94125.1	MBD5	methyl-CpG binding domain protein 5	-1.808	-3.50157	0.001013
227379_at	Hs.241101.0	MBOAT1	membrane bound O-acyltransferase domain containing 1	-0.764	-1.69819	0.037714
1557292_a_at	Hs2.277871.1	MCOLN3	mucolipin 3	-1.116	-2.16745	0.006161
242308_at	Hs.131450.0	MCOLN3	mucolipin 3	-1.347	-2.54383	0.004852
220122_at	g13376020	MCTP1	multiple C2 domains, transmembrane 1	-1.896	-3.7218	0.044486
220603_s_at	g8922916	MCTP2	multiple C2 domains, transmembrane 2	-1.088	-2.12579	0.0441
1558077_s_at	Hs2.423457.1	MDH1B	malate dehydrogenase 1B	-1.153	-2.22376	0.010754
235105_at	Hs.182585.0	MED28	mediator complex subunit 28	-0.935	-1.91189	0.003345
210104_at	g3329505	MED6	mediator complex subunit 6	-0.637	-1.55509	0.034653
207079_s_at	g4885480	MED6	mediator complex subunit 6	-0.82	-1.76541	0.013586
227058_at	Hs.62905.0	MEDAG	mesenteric estrogen-dependent adipogenesis	-0.773	-1.70882	0.032738
207968_s_at	g4505146	MEF2C	myocyte enhancer factor 2C	-0.746	-1.67714	0.039506
209200_at	Hs.78995.1	MEF2C	myocyte enhancer factor 2C	-1.016	-2.0223	0.005848
1552439_s_at	Hs2.248367.1	MEGF11	multiple EGF-like-domains 11	-1.94	-3.83706	0.032284
226869_at	Hs.124863.0	MEGF6	multiple EGF-like-domains 6	-1.822	-3.53571	0.022962
238158_at	Hs.129074.0	MEIG1	meiosis/spermiogenesis associated 1	-0.642	-1.56049	0.020789
214077_x_at	Hs.117313.0	MEIS3P1	Meis homeobox 3 pseudogene 1	-1.045	-2.06337	0.031556
206028_s_at	g5453737	MERTK	MER proto-oncogene, tyrosine kinase	-0.739	-1.66902	0.01357
211913_s_at	g897614	MERTK	MER proto-oncogene, tyrosine kinase	-0.949	-1.93053	0.021616
227805_at	Hs.47315.0	METAP1D	methionyl aminopeptidase type 1D (mitochondrial)	-1.271	-2.41329	0.004324
235552_at	Hs.157149.0	METTL14	methyltransferase like 14	-0.725	-1.6529	0.013686
232102_at	Hs.299092.0	METTL6	methyltransferase like 6	-2.419	-5.348	0.000571
219858_s_at	g8923159	MFSD6	major facilitator superfamily domain containing 6	-1.196	-2.29104	0.008435
225325_at	Hs.23412.1	MFSD6	major facilitator superfamily domain containing 6	-1.317	-2.49147	0.011038
231283_at	Hs.157281.0	MGAT4A	mannosyl (alpha-1,3-)-glycoprotein beta-1,4-N-acetylglucosaminyltransferase, isozyme A	-1.078	-2.11111	0.025365
226039_at	Hs.24210.0	MGAT4A	mannosyl (alpha-1,3-)-glycoprotein beta-1,4-N-acetylglucosaminyltransferase, isozyme A	-1.222	-2.3327	0.019095
204168_at	g4505180	MGST2	microsomal glutathione S-transferase 2	-0.664	-1.58447	0.038878
218376_s_at	g12232438	MICAL1	microtubule associated monooxygenase, calponin and LIM domain containing 1	-0.992	-1.98894	0.007397
215909_x_at	Hs.112028.2	MINK1	misshapen-like kinase 1	-0.687	-1.60993	0.03942
244246_at	Hs.146134.0	MIPOL1	mirror-image polydactyly 1	-1.554	-2.9363	0.038073
236480_at	Hs.154077.0	MIR210HG	MIR210 host gene	-2.968	-7.82451	0.000771
237321_at	Hs.157007.0	MIR3681HG	MIR3681 host gene	-1.786	-3.44857	0.004478
238025_at	Hs.119878.0	MLKL	mixed lineage kinase domain-like	-0.732	-1.66094	0.013876
225157_at	Hs.52081.1	MLXIP	MLX interacting protein	-0.816	-1.76052	0.018777
242750_at	Hs.117747.0	MMAA	methylmalonic aciduria (cobalamin deficiency) cblA type	-0.652	-1.57135	0.045971
238975_at	Hs.170470.0	MMAB	methylmalonic aciduria (cobalamin deficiency) cblB type	-1.12	-2.17347	0.029319
205680_at	g4505204	MMP10	matrix metallopeptidase 10	-3.481	-11.1657	0.002246
203936_s_at	g4826835	MMP9	matrix metallopeptidase 9	-3.96	-15.5625	0.001423
212508_at	Hs.24719.0	MOAP1	modulator of apoptosis 1	-1.263	-2.39994	0.031965
219265_at	g13376100	MOB3B	MOB kinase activator 3B	-0.787	-1.72548	0.010886
229568_at	Hs.76605.0	MOB3B	MOB kinase activator 3B	-1.322	-2.50012	0.036241
238576_at	Hs.6006.0	MOCOS	molybdenum cofactor sulfurase	-0.946	-1.92652	0.038128
223849_s_at	g12803446	MOV10	Mov10 RISC complex RNA helicase	-1.565	-2.95878	0.001013
233917_s_at	Hs.20725.2	MOV10	Mov10 RISC complex RNA helicase	-1.586	-3.00216	0.000379
209708_at	g9988949	MOXD1	monooxygenase, DBH-like 1	-1.221	-2.33108	0.014654
1554474_a_at	Hs2.6909.2	MOXD1	monooxygenase, DBH-like 1	-1.285	-2.43682	0.009552
213306_at	Hs.169378.1	MPDZ	multiple PDZ domain protein	-0.929	-1.90396	0.006829
205079_s_at	g4505230	MPDZ	multiple PDZ domain protein	-1.089	-2.12727	0.007748
203780_at	g9392652	MPZL2	myelin protein zero-like 2	-1.356	-2.55974	0.009531
227747_at	Hs.15396.0	MPZL3	myelin protein zero-like 3	-1.484	-2.79723	0.003483
210224_at	g4104081	MR1	major histocompatibility complex, class I-related	-0.688	-1.61105	0.030899
232682_at	Hs.79741.1	MREG	melanoregulin	-0.703	-1.62789	0.021164
219648_at	g8922236	MREG	melanoregulin	-1.532	-2.89186	0.000659
242289_at	Hs.152000.0	MRPL42	mitochondrial ribosomal protein L42	-0.776	-1.71238	0.019395
230575_at	Hs.159204.0	MSRB2	methionine sulfoxide reductase B2	-1.294	-2.45207	0.042813
205614_x_at	g10337614	MST1	macrophage stimulating 1	-1.032	-2.04486	0.011946
216320_x_at	Hs.278657.2	MST1	macrophage stimulating 1	-1.078	-2.11111	0.00773
220346_at	g13376512	MTHFD2L	methylenetetrahydrofolate dehydrogenase (NADP+ dependent) 2-like	-1.652	-3.14269	0.00576
228593_at	Hs.82646.1	MTMR9LP	myotubularin related protein 9-like, pseudogene	-1.191	-2.28311	0.012124
244763_at	Hs.171515.0	MTRF1	mitochondrial translational release factor 1	-0.998	-1.99723	0.018229
219822_at	g4758743	MTRF1	mitochondrial translational release factor 1	-1.163	-2.23923	0.011011
212096_s_at	Hs.7946.0	MTUS1	microtubule associated tumor suppressor 1	-0.881	-1.84165	0.046155
210778_s_at	g12803750	MXD4	MAX dimerization protein 4	-0.939	-1.9172	0.003885
229464_at	Hs.93985.0	MYEF2	myelin expression factor 2	-1.869	-3.65279	0.005161
222772_at	Hs.44268.0	MYEF2	myelin expression factor 2	-1.89	-3.70635	0.002251
222153_at	Hs.44268.1	MYEF2	myelin expression factor 2	-2.254	-4.77004	8.4e-05
232676_x_at	Hs.44268.2	MYEF2	myelin expression factor 2	-2.263	-4.79989	0.001577
228792_at	Hs.6638.0	MYEF2	myelin expression factor 2	-2.285	-4.87364	0.001504
222771_s_at	Hs.44268.0	MYEF2	myelin expression factor 2	-2.367	-5.15867	0.003462
205940_at	g11342671	MYH3	myosin, heavy chain 3, skeletal muscle, embryonic	-1.25	-2.37841	0.013876
1555977_at	Hs2.311412.1	MYL12A	myosin light chain 12A	-1.133	-2.19314	0.035835
1555978_s_at	Hs2.311412.1	MYL12A	myosin light chain 12A	-1.183	-2.27048	0.04359
212338_at	Hs.39871.0	MYO1D	myosin ID	-1.961	-3.89332	0.000992
225301_s_at	Hs.172506.0	MYO5B	myosin VB	-0.733	-1.66209	0.037561
225299_at	Hs.172506.0	MYO5B	myosin VB	-1.334	-2.52101	0.032553
203216_s_at	g4826845	MYO6	myosin VI	-0.635	-1.55294	0.045757
203215_s_at	Hs.22564.0	MYO6	myosin VI	-0.873	-1.83147	0.016835
210480_s_at	g9280815	MYO6	myosin VI	-0.969	-1.95748	0.010816
214906_x_at	Hs.22174.2	N4BP2L1	NEDD4 binding protein 2-like 1	-0.66	-1.58008	0.04738
214887_at	Hs.22174.2	N4BP2L1	NEDD4 binding protein 2-like 1	-0.821	-1.76663	0.025754
213375_s_at	Hs.22174.0	N4BP2L1	NEDD4 binding protein 2-like 1	-2.371	-5.173	0.046669
213630_at	Hs.96633.0	NACAD	NAC alpha domain containing	-0.977	-1.96837	0.008248
238446_at	Hs.167726.0	NAIP	NLR family, apoptosis inhibitory protein	-0.803	-1.74473	0.048549
219862_s_at	g6912523	NARF	nuclear prelamin A recognition factor	-0.833	-1.78139	0.01957
226657_at	Hs.14478.0	NATD1	N-acetyltransferase domain containing 1	-1.194	-2.28786	0.039595
223638_at	g12053278	NBPF3	neuroblastoma breakpoint family, member 3	-1.186	-2.27521	0.003828
1553992_s_at	Hs2.375149.1	NBR2	neighbor of BRCA1 gene 2 (non-protein coding)	-1.048	-2.06766	0.014343
208979_at	g7140573	NCOA6	nuclear receptor coactivator 6	-0.805	-1.74715	0.004152
225344_at	Hs.6966.0	NCOA7	nuclear receptor coactivator 7	-2.129	-4.37414	0.000866
219747_at	g13375747	NDNF	neuron-derived neurotrophic factor	-1.336	-2.5245	0.005348
209159_s_at	Hs.322430.1	NDRG4	NDRG family member 4	-1.008	-2.01112	0.007529
205113_at	g4885512	NEFM	neurofilament, medium polypeptide	-1.023	-2.03214	0.028031
1553194_at	Hs2.299916.1	NEGR1	neuronal growth regulator 1	-1.154	-2.2253	0.035504
243357_at	Hs.203838.0	NEGR1	neuronal growth regulator 1	-1.726	-3.30809	0.017164
229461_x_at	Hs.296235.0	NEGR1	neuronal growth regulator 1	-2.197	-4.58525	0.008644
219542_at	g13376174	NEK11	NIMA-related kinase 11	-0.699	-1.62338	0.042685
230153_at	Hs.194581.0	NEK9	NIMA-related kinase 9	-0.87	-1.82766	0.005232
212299_at	Hs.7200.0	NEK9	NIMA-related kinase 9	-0.898	-1.86348	0.00226
236270_at	Hs.167864.0	NFATC4	nuclear factor of activated T-cells, cytoplasmic, calcineurin-dependent 4	-1.696	-3.24001	0.023847
236471_at	Hs.61145.0	NFE2L3	nuclear factor, erythroid 2-like 3	-1.004	-2.00555	0.031531
204702_s_at	g5731346	NFE2L3	nuclear factor, erythroid 2-like 3	-1.107	-2.15397	0.003492
211467_s_at	g1916623	NFIB	nuclear factor I/B	-0.739	-1.66902	0.020847
213032_at	Hs.326416.0	NFIB	nuclear factor I/B	-0.756	-1.6888	0.044417
213029_at	Hs.326416.0	NFIB	nuclear factor I/B	-0.779	-1.71594	0.038675
213033_s_at	Hs.326416.0	NFIB	nuclear factor I/B	-0.824	-1.77031	0.030935
231699_at	Hs.81328.1	NFKBIA	nuclear factor of kappa light polypeptide gene enhancer in B-cells inhibitor, alpha	-2.12	-4.34694	0.000353
201502_s_at	Hs.81328.0	NFKBIA	nuclear factor of kappa light polypeptide gene enhancer in B-cells inhibitor, alpha	-2.552	-5.86447	8.4e-05
223217_s_at	Hs.301183.0	NFKBIZ	nuclear factor of kappa light polypeptide gene enhancer in B-cells inhibitor, zeta	-3.08	-8.45614	0.001453
223218_s_at	g13516830	NFKBIZ	nuclear factor of kappa light polypeptide gene enhancer in B-cells inhibitor, zeta	-3.415	-10.6664	0.000248
224303_x_at	g12655861	NIN	ninein (GSK3B interacting protein)	-0.656	-1.57571	0.034701
234299_s_at	Hs.12772.1	NIN	ninein (GSK3B interacting protein)	-0.714	-1.64035	0.035034
207705_s_at	g13378150	NINL	ninein-like	-1.143	-2.2084	0.001229
1552696_at	Hs2.352617.1	NIPA1	non imprinted in Prader-Willi/Angelman syndrome 1	-0.795	-1.73508	0.002716
225752_at	Hs.8177.0	NIPA1	non imprinted in Prader-Willi/Angelman syndrome 1	-0.819	-1.76418	0.010257
229015_at	Hs.46699.0	NIPSNAP3B	nipsnap homolog 3B (C. elegans)	-0.787	-1.72548	0.047766
211024_s_at	g13623242	NKX2-1	NK2 homeobox 1	-2.427	-5.37774	0.024856
203964_at	g4758813	NMI	N-myc (and STAT) interactor	-1.481	-2.79142	0.0311
219147_s_at	g8923529	NMRK1	nicotinamide riboside kinase 1	-1.907	-3.75028	0.010329
221567_at	g3172418	NOL3	nucleolar protein 3 (apoptosis repressor with CARD domain)	-0.867	-1.82387	0.044379
59625_at	4854714_RC	NOL3	nucleolar protein 3 (apoptosis repressor with CARD domain)	-0.981	-1.97383	0.044786
1558738_at	Hs2.372887.1	NOL3	nucleolar protein 3 (apoptosis repressor with CARD domain)	-1.568	-2.96493	0.013936
225224_at	Hs.19221.0	NOL4L	nucleolar protein 4-like	-2.119	-4.34393	0.005024
207437_at	g6031188	NOVA1	neuro-oncological ventral antigen 1	-1.373	-2.59009	0.036506
205794_s_at	g4505424	NOVA1	neuro-oncological ventral antigen 1	-2.318	-4.9864	0.000321
213462_at	Hs.296355.0	NPAS2	neuronal PAS domain protein 2	-0.887	-1.84933	0.029566
39549_at	4919382_RC	NPAS2	neuronal PAS domain protein 2	-0.917	-1.88818	0.032969
202679_at	g4557802	NPC1	Niemann-Pick disease, type C1	-0.64	-1.55833	0.041205
225911_at	Hs.8236.0	NPNT	nephronectin	-1.983	-3.95314	0.001457
243996_at	Hs.151334.0	NPR2	natriuretic peptide receptor 2	-1.434	-2.70195	0.003058
204310_s_at	g4580421	NPR2	natriuretic peptide receptor 2	-2.242	-4.73052	0.00053
214066_x_at	Hs.256747.1	NPR2	natriuretic peptide receptor 2	-2.304	-4.93825	0.000407
205440_s_at	g4505444	NPY1R	neuropeptide Y receptor Y1	-2.397	-5.26707	0.000959
207400_at	g5453795	NPY5R	neuropeptide Y receptor Y5	-1.663	-3.16674	0.000959
204791_at	g4507672	NR2C1	nuclear receptor subfamily 2, group C, member 1	-0.806	-1.74836	0.00443
207443_at	g11141398	NR2E1	nuclear receptor subfamily 2, group E, member 1	-1.317	-2.49147	0.005151
204622_x_at	g5453821	NR4A2	nuclear receptor subfamily 4, group A, member 2	-1.382	-2.60629	0.041584
216248_s_at	Hs.82120.1	NR4A2	nuclear receptor subfamily 4, group A, member 2	-1.702	-3.25352	0.019095
208337_s_at	g4504342	NR5A2	nuclear receptor subfamily 5, group A, member 2	-1.388	-2.61716	0.039595
224985_at	Hs.260523.1	NRAS	neuroblastoma RAS viral (v-ras) oncogene homolog	-1.573	-2.97523	0.000949
202647_s_at	g6006027	NRAS	neuroblastoma RAS viral (v-ras) oncogene homolog	-1.715	-3.28297	0.00075
204105_s_at	g4826863	NRCAM	neuronal cell adhesion molecule	-0.964	-1.95071	0.021405
216959_x_at	Hs.7912.2	NRCAM	neuronal cell adhesion molecule	-1.286	-2.43851	0.010524
201309_x_at	g1244509	NREP	neuronal regeneration related protein	-1.119	-2.17196	0.032798
201310_s_at	g4758865	NREP	neuronal regeneration related protein	-1.12	-2.17347	0.033683
230424_at	Hs.120969.0	NREP	neuronal regeneration related protein	-1.369	-2.58291	0.031883
242303_at	Hs.145842.0	NRG2	neuregulin 2	-1.19	-2.28153	0.002104
228699_at	Hs.17778.4	NRP2	neuropilin 2	-1.299	-2.46058	0.000866
223510_at	g11907927	NRP2	neuropilin 2	-1.434	-2.70195	0.003049
229225_at	Hs.17778.6	NRP2	neuropilin 2	-1.641	-3.11882	0.000665
222877_at	Hs.63382.0	NRP2	neuropilin 2	-1.713	-3.27842	0.000727
225566_at	Hs.17778.2	NRP2	neuropilin 2	-1.796	-3.47256	0.00058
214632_at	Hs.17778.8	NRP2	neuropilin 2	-1.826	-3.54553	0.000476
211844_s_at	g2547129	NRP2	neuropilin 2	-1.871	-3.65786	0.000774
219367_s_at	g8924189	NRP2	neuropilin 2	-1.887	-3.69865	0.00058
235359_at	Hs.162185.0	NRROS	negative regulator of reactive oxygen species	-1.159	-2.23303	0.026133
242239_at	Hs.293147.0	NSUN6	NOP2/Sun domain family, member 6	-0.936	-1.91322	0.039976
241962_at	Hs.135801.0	NT5DC1	5'-nucleotidase domain containing 1	-1.258	-2.39164	0.002882
227816_at	Hs.96917.0	NTN1	netrin 1	-0.637	-1.55509	0.012759
206713_at	g7662425	NTNG1	netrin G1	-1.996	-3.98893	0.013505
238133_at	Hs.143707.0	NTNG1	netrin G1	-2.049	-4.13819	0.004637
236088_at	Hs.171136.0	NTNG1	netrin G1	-3.451	-10.9359	0.002551
220176_at	g13376746	NUBPL	nucleotide binding protein-like	-0.822	-1.76786	0.03055
212605_s_at	Hs.323470.0	NUDT3	nudix hydrolase 3	-0.643	-1.56157	0.040682
212608_s_at	Hs.323470.0	NUDT3	nudix hydrolase 3	-0.786	-1.72429	0.030497
220183_s_at	g11095442	NUDT6	nudix hydrolase 6	-0.917	-1.88818	0.017247
230329_s_at	Hs.284244.1	NUDT6	nudix hydrolase 6	-1.028	-2.0392	0.013702
1552564_at	Hs2.292857.1	NUDT9P1	nudix hydrolase 9 pseudogene 1	-0.652	-1.57135	0.048149
220035_at	g13376397	NUP210	nucleoporin 210kDa	-0.996	-1.99446	0.008662
213947_s_at	Hs.56966.1	NUP210	nucleoporin 210kDa	-1.055	-2.07772	0.027684
212316_at	Hs.56966.0	NUP210	nucleoporin 210kDa	-1.194	-2.28786	0.003012
213945_s_at	Hs.56966.1	NUP210	nucleoporin 210kDa	-1.341	-2.53327	0.010653
232960_at	Hs.307106.0	NUP62CL	nucleoporin 62kDa C-terminal like	-1.689	-3.22433	0.000456
220520_s_at	g8923134	NUP62CL	nucleoporin 62kDa C-terminal like	-2.644	-6.25062	0.000303
228379_at	Hs.75968.1	NUTF2	nuclear transport factor 2	-0.797	-1.73748	0.033941
235030_at	Hs.154840.0	NXPE3	neurexophilin and PC-esterase domain family, member 3	-1.073	-2.1038	0.024113
243606_at	Hs.33410.0	NXPE3	neurexophilin and PC-esterase domain family, member 3	-1.165	-2.24233	0.025335
217540_at	Hs.293253.0	NXPE3	neurexophilin and PC-esterase domain family, member 3	-1.271	-2.41329	0.006629
228781_at	Hs.62314.0	OBFC1	oligonucleotide/oligosaccharide-binding fold containing 1	-0.977	-1.96837	0.044543
227492_at	Hs.171952.1	OCLN	occludin	-1.203	-2.30218	0.01363
231022_at	Hs.134586.0	OCLN	occludin	-1.215	-2.32141	0.007226
209925_at	g1322281	OCLN	occludin	-1.477	-2.78369	0.001884
231909_x_at	Hs.71109.2	ODF2L	outer dense fiber of sperm tails 2-like	-1.07	-2.09943	0.021033
228577_x_at	Hs.71109.1	ODF2L	outer dense fiber of sperm tails 2-like	-1.28	-2.42839	0.008873
226810_at	Hs.13299.0	OGFRL1	opioid growth factor receptor-like 1	-1.512	-2.85205	0.002562
238469_at	Hs.233276.0	OGFRL1	opioid growth factor receptor-like 1	-1.607	-3.04618	0.010754
212307_s_at	Hs.100293.2	OGT	O-linked N-acetylglucosamine (GlcNAc) transferase	-0.801	-1.74231	0.044372
207563_s_at	g2266993	OGT	O-linked N-acetylglucosamine (GlcNAc) transferase	-0.857	-1.81127	0.009486
209240_at	Hs.100293.1	OGT	O-linked N-acetylglucosamine (GlcNAc) transferase	-0.884	-1.84548	0.004947
229787_s_at	Hs.100293.3	OGT	O-linked N-acetylglucosamine (GlcNAc) transferase	-0.924	-1.89737	0.003681
220594_at	g13376783	OGT	O-linked N-acetylglucosamine (GlcNAc) transferase	-0.926	-1.9	0.031798
202074_s_at	g11415041	OPTN	optineurin	-1.129	-2.18707	0.023291
202073_at	Hs.278898.0	OPTN	optineurin	-1.848	-3.60001	0.004021
1554706_at	Hs2.372936.1	OR2L13	olfactory receptor, family 2, subfamily L, member 13	-1.562	-2.95263	0.046186
221864_at	Hs.119598.1	ORAI3	ORAI calcium release-activated calcium modulator 3	-2.039	-4.10961	0.006551
203352_at	g4505522	ORC4	origin recognition complex subunit 4	-1.048	-2.06766	0.033401
219073_s_at	g8923336	OSBPL10	oxysterol binding protein-like 10	-1.574	-2.97729	0.001767
209221_s_at	Hs.15519.1	OSBPL2	oxysterol binding protein-like 2	-0.897	-1.86219	0.016809
227359_at	Hs.184361.0	OSCP1	organic solute carrier partner 1	-0.647	-1.56591	0.031926
240550_at	Hs.117295.0	OTUB2	OTU deubiquitinase, ubiquitin aldehyde binding 2	-0.904	-1.87125	0.006929
238848_at	Hs.253550.0	OTUD4	OTU deubiquitinase 4	-0.739	-1.66902	0.028498
205432_at	g4505534	OVGP1	oviductal glycoprotein 1	-1.516	-2.85997	0.001541
207543_s_at	g4505564	P4HA1	prolyl 4-hydroxylase, alpha polypeptide I	-0.893	-1.85703	0.032697
205962_at	g4505598	PAK2	p21 protein (Cdc42/Rac)-activated kinase 2	-0.658	-1.57789	0.016507
229201_at	Hs.13326.0	PAK3	p21 protein (Cdc42/Rac)-activated kinase 3	-1.21	-2.31338	0.040759
203117_s_at	g7662257	PAN2	PAN2 poly(A) specific ribonuclease subunit	-0.811	-1.75443	0.042574
50400_at	4870267_RC	PAOX	polyamine oxidase (exo-N4-amino)	-1.573	-2.97523	0.001452
226435_at	Hs.301152.0	PAPLN	papilin, proteoglycan-like sulfated glycoprotein	-2.9	-7.46426	0.001366
212720_at	Hs.5324.2	PAPOLA	poly(A) polymerase alpha	-0.757	-1.68997	0.020148
1557576_at	Hs2.374711.1	PAQR3	progestin and adipoQ receptor family member III	-0.842	-1.79253	0.005596
226423_at	Hs.239388.1	PAQR8	progestin and adipoQ receptor family member VIII	-0.762	-1.69584	0.005596
204687_at	g7661631	PARM1	prostate androgen-regulated mucin-like protein 1	-0.809	-1.752	0.043411
232610_at	Hs.152925.1	PARP14	poly(ADP-ribose) polymerase family member 14	-0.754	-1.68646	0.004046
224701_at	Hs.152925.0	PARP14	poly(ADP-ribose) polymerase family member 14	-0.988	-1.98343	0.001827
219033_at	g13375831	PARP8	poly(ADP-ribose) polymerase family member 8	-0.904	-1.87125	0.038202
244008_at	Hs.32468.0	PARP8	poly(ADP-ribose) polymerase family member 8	-1.3	-2.46229	0.015839
223220_s_at	g12751138	PARP9	poly(ADP-ribose) polymerase family member 9	-1.148	-2.21606	0.046582
233510_s_at	Hs.120243.1	PARVG	parvin, gamma	-1.345	-2.5403	0.004087
223562_at	g11036541	PARVG	parvin, gamma	-1.435	-2.70382	0.003414
240687_at	Hs.160594.0	PASD1	PAS domain containing 1	-0.781	-1.71832	0.043312
228635_at	Hs.146858.0	PCDH10	protocadherin 10	-1.586	-3.00216	0.008142
228640_at	Hs.10338.0	PCDH7	protocadherin 7	-2.756	-6.75521	0.035673
225505_s_at	Hs.29341.0	PCED1A	PC-esterase domain containing 1A	-0.792	-1.73147	0.036077
230408_at	Hs.8834.2	PCGF3	polycomb group ring finger 3	-1.619	-3.07162	0.00058
212406_s_at	Hs.184628.2	PCMTD2	protein-L-isoaspartate (D-aspartate) O-methyltransferase domain containing 2	-1.391	-2.6226	0.000944
238792_at	Hs.149274.0	PCNX	pecanex homolog (Drosophila)	-0.878	-1.83783	0.008442
213159_at	Hs.55947.0	PCNX	pecanex homolog (Drosophila)	-1.089	-2.12727	0.004278
213173_at	Hs.55947.0	PCNX	pecanex homolog (Drosophila)	-1.34	-2.53151	0.002034
239100_x_at	Hs.114524.0	PCNX	pecanex homolog (Drosophila)	-1.367	-2.57934	0.000334
229287_at	Hs.93813.0	PCNX	pecanex homolog (Drosophila)	-1.415	-2.6666	0.008356
235082_at	Hs.39738.0	PCNX	pecanex homolog (Drosophila)	-1.42	-2.67586	0.002488
213652_at	Hs.288931.0	PCSK5	proprotein convertase subtilisin/kexin type 5	-0.846	-1.79751	0.026011
237248_at	Hs.47208.0	PDE11A	phosphodiesterase 11A	-1.32	-2.49666	0.026133
236300_at	Hs.191045.0	PDE3A	phosphodiesterase 3A, cGMP-inhibited	-0.702	-1.62676	0.023264
210837_s_at	g2735858	PDE4D	phosphodiesterase 4D, cAMP-specific	-1.142	-2.20687	0.010119
228962_at	Hs.28482.0	PDE4D	phosphodiesterase 4D, cAMP-specific	-1.275	-2.41999	0.006075
204491_at	Hs.172081.0	PDE4D	phosphodiesterase 4D, cAMP-specific	-1.3	-2.46229	0.002136
210836_x_at	g2735856	PDE4D	phosphodiesterase 4D, cAMP-specific	-1.398	-2.63536	0.012094
205872_x_at	g11641276	PDE4DIP	phosphodiesterase 4D interacting protein	-0.783	-1.72071	0.011223
240088_at	Hs.116533.0	PDE5A	phosphodiesterase 5A, cGMP-specific	-1.469	-2.7683	0.020742
205593_s_at	g4505674	PDE9A	phosphodiesterase 9A	-1.205	-2.30537	0.010201
219304_s_at	g13376807	PDGFD	platelet derived growth factor D	-1.101	-2.14503	0.017283
1554828_at	Hs2.74615.2	PDGFRA	platelet-derived growth factor receptor, alpha polypeptide	-0.904	-1.87125	0.041279
215305_at	Hs.166074.0	PDGFRA	platelet-derived growth factor receptor, alpha polypeptide	-0.977	-1.96837	0.008148
203131_at	g5453869	PDGFRA	platelet-derived growth factor receptor, alpha polypeptide	-1.392	-2.62442	0.027846
209493_at	g12751451	PDZD2	PDZ domain containing 2	-1.342	-2.53503	0.012303
219132_at	g10864062	PELI2	pellino E3 ubiquitin protein ligase family member 2	-1.666	-3.17334	0.013916
205160_at	Hs.31034.0	PEX11A	peroxisomal biogenesis factor 11 alpha	-1.235	-2.35381	0.023476
209992_at	g11933148	PFKFB2	6-phosphofructo-2-kinase/fructose-2,6-biphosphatase 2	-0.742	-1.67249	0.012483
228499_at	Hs.198278.1	PFKFB4	6-phosphofructo-2-kinase/fructose-2,6-biphosphatase 4	-1.384	-2.60991	0.010503
209652_s_at	g12802997	PGF	placental growth factor	-0.779	-1.71594	0.048653
1558365_at	Hs2.288933.1	PGK1	phosphoglycerate kinase 1	-1.325	-2.50533	0.015653
1554316_at	Hs2.351865.1	PGLS	6-phosphogluconolactonase	-0.862	-1.81756	0.014614
237202_at	Hs.230947.0	PGPEP1	pyroglutamyl-peptidase I	-0.946	-1.92652	0.01973
204047_s_at	Hs.102471.0	PHACTR2	phosphatase and actin regulator 2	-0.65	-1.56917	0.038078
204048_s_at	Hs.102471.0	PHACTR2	phosphatase and actin regulator 2	-0.755	-1.68763	0.01909
244774_at	Hs.271593.0	PHACTR2	phosphatase and actin regulator 2	-0.969	-1.95748	0.026637
225048_at	Hs.7759.0	PHF10	PHD finger protein 10	-0.813	-1.75686	0.009611
219126_at	g8922799	PHF10	PHD finger protein 10	-0.979	-1.9711	0.017204
242060_x_at	Hs.256282.0	PHF11	PHD finger protein 11	-0.715	-1.64148	0.024458
221816_s_at	Hs.279799.1	PHF11	PHD finger protein 11	-3.525	-11.5115	1.3e-05
201397_at	g5729973	PHGDH	phosphoglycerate dehydrogenase	-1.669	-3.17994	0.000328
215285_s_at	Hs.123637.2	PHTF1	putative homeodomain transcription factor 1	-1.365	-2.57576	0.002244
210191_s_at	g12803264	PHTF1	putative homeodomain transcription factor 1	-1.588	-3.00632	0.004128
205702_at	g5729975	PHTF1	putative homeodomain transcription factor 1	-1.773	-3.41764	0.006407
218652_s_at	g8923239	PIGG	phosphatidylinositol glycan anchor biosynthesis class G	-1.45	-2.73208	0.043631
232262_at	Hs.257796.0	PIGL	phosphatidylinositol glycan anchor biosynthesis class L	-1.092	-2.13169	0.033458
220041_at	g13376764	PIGZ	phosphatidylinositol glycan anchor biosynthesis class Z	-1.86	-3.63008	0.005161
229705_at	Hs.3734.0	PIK3C3	phosphatidylinositol 3-kinase, catalytic subunit type 3	-1.129	-2.18707	0.045332
203879_at	g2317893	PIK3CD	phosphatidylinositol-4,5-bisphosphate 3-kinase, catalytic subunit delta	-0.661	-1.58118	0.015845
206370_at	g4505802	PIK3CG	phosphatidylinositol-4,5-bisphosphate 3-kinase, catalytic subunit gamma	-1.301	-2.464	0.025623
206369_s_at	g12620870	PIK3CG	phosphatidylinositol-4,5-bisphosphate 3-kinase, catalytic subunit gamma	-1.905	-3.74509	0.00605
239294_at	Hs.122915.0	PIK3CG	phosphatidylinositol-4,5-bisphosphate 3-kinase, catalytic subunit gamma	-2.122	-4.35297	0.001753
221756_at	Hs.26670.0	PIK3IP1	phosphoinositide-3-kinase interacting protein 1	-1.292	-2.44867	0.036312
205632_s_at	g4505816	PIP5K1B	phosphatidylinositol-4-phosphate 5-kinase, type I, beta	-1.748	-3.35893	0.012961
235403_at	Hs.131040.0	PIRC66	piwi-interacting RNA cluster 66	-0.766	-1.70055	0.035445
238649_at	Hs.193513.0	PITPNC1	phosphatidylinositol transfer protein, cytoplasmic 1	-2.346	-5.08413	0.004809
229414_at	Hs.30514.0	PITPNC1	phosphatidylinositol transfer protein, cytoplasmic 1	-3.237	-9.42832	0.000586
207717_s_at	g4758931	PKP2	plakophilin 2	-1.292	-2.44867	0.007966
209581_at	g12655072	PLA2G16	phospholipase A2, group XVI	-0.915	-1.88557	0.01715
235110_at	Hs.122589.0	PLA2G16	phospholipase A2, group XVI	-1.693	-3.23328	9.2e-05
209785_s_at	g3811344	PLA2G4C	phospholipase A2, group IVC (cytosolic, calcium-independent)	-1.129	-2.18707	0.009075
202789_at	Hs.268177.0	PLCG1	phospholipase C, gamma 1	-0.89	-1.85318	0.023591
240805_at	Hs.161402.0	PLCG1	phospholipase C, gamma 1	-0.955	-1.93858	0.023975
230917_at	Hs.6179.2	PLCG2	phospholipase C, gamma 2 (phosphatidylinositol-specific)	-0.779	-1.71594	0.026359
205934_at	g5453911	PLCL1	phospholipase C-like 1	-1.098	-2.14058	0.020825
235230_at	Hs.6594.0	PLCXD2	phosphatidylinositol-specific phospholipase C, X domain containing 2	-1.147	-2.21453	0.004881
215724_at	Hs.82587.1	PLD1	phospholipase D1, phosphatidylcholine-specific	-1.932	-3.81584	0.015676
215723_s_at	Hs.82587.1	PLD1	phospholipase D1, phosphatidylcholine-specific	-2.078	-4.22221	0.002826
226636_at	Hs.93837.2	PLD1	phospholipase D1, phosphatidylcholine-specific	-2.887	-7.39731	0.004038
205203_at	g4505872	PLD1	phospholipase D1, phosphatidylcholine-specific	-3.074	-8.42105	0.002431
177_at	U38545	PLD1	phospholipase D1, phosphatidylcholine-specific	-3.115	-8.6638	0.001622
218644_at	g7706642	PLEK2	pleckstrin 2	-2.27	-4.82323	0.022874
228450_at	Hs.12332.0	PLEKHA7	pleckstrin homology domain containing, family A member 7	-0.792	-1.73147	0.035673
226122_at	Hs.51965.0	PLEKHG1	pleckstrin homology domain containing, family G (with RhoGef domain) member 1	-1.448	-2.7283	0.026386
225727_at	Hs.284157.0	PLEKHH1	pleckstrin homology domain containing, family H (with MyTH4 domain) member 1	-1.273	-2.41664	0.032793
239568_at	Hs.255938.0	PLEKHH2	pleckstrin homology domain containing, family H (with MyTH4 domain) member 2	-1.496	-2.8206	0.008626
243650_at	Hs.144901.0	PLEKHH2	pleckstrin homology domain containing, family H (with MyTH4 domain) member 2	-1.626	-3.08656	0.000505
227148_at	Hs.32241.0	PLEKHH2	pleckstrin homology domain containing, family H (with MyTH4 domain) member 2	-1.827	-3.54799	0.001188
204519_s_at	g7705754	PLLP	plasmolipin	-1.343	-2.53678	0.003341
227385_at	Hs.29669.0	PLPP6	phospholipid phosphatase 6	-1.266	-2.40494	0.004042
204285_s_at	Hs.96.0	PMAIP1	phorbol-12-myristate-13-acetate-induced protein 1	-0.758	-1.69114	0.005778
218224_at	g11141858	PNMA1	paraneoplastic Ma antigen 1	-0.887	-1.84933	0.009044
203718_at	g5729950	PNPLA6	patatin-like phospholipase domain containing 6	-0.81	-1.75321	0.041064
209034_at	g12751123	PNRC1	proline-rich nuclear receptor coactivator 1	-2.467	-5.52893	0.012806
238992_at	Hs.128076.0	POLI	polymerase (DNA directed) iota	-0.944	-1.92385	0.038073
222253_s_at	Hs.278387.1	POM121L9P	POM121 transmembrane nucleoporin-like 9, pseudogene	-0.816	-1.76052	0.023118
1559496_at	Hs2.134366.1	PPA2	pyrophosphatase (inorganic) 2	-1.435	-2.70382	0.012023
223438_s_at	g13278779	PPARA	peroxisome proliferator-activated receptor alpha	-0.997	-1.99585	0.016458
226978_at	Hs.286014.0	PPARA	peroxisome proliferator-activated receptor alpha	-1.07	-2.09943	0.029389
244689_at	Hs.272006.0	PPARA	peroxisome proliferator-activated receptor alpha	-1.35	-2.54912	0.019753
223437_at	Hs.275711.0	PPARA	peroxisome proliferator-activated receptor alpha	-1.433	-2.70008	0.023487
219195_at	g7019498	PPARGC1A	peroxisome proliferator-activated receptor gamma, coactivator 1 alpha	-1.785	-3.44618	0.017489
203966_s_at	g10337594	PPM1A	protein phosphatase, Mg2+/Mn2+ dependent, 1A	-1.052	-2.0734	0.005717
231370_at	Hs.57764.2	PPM1A	protein phosphatase, Mg2+/Mn2+ dependent, 1A	-1.113	-2.16295	0.002716
227728_at	Hs.108829.0	PPM1A	protein phosphatase, Mg2+/Mn2+ dependent, 1A	-1.751	-3.36592	0.036321
244011_at	Hs.291000.1	PPM1K	protein phosphatase, Mg2+/Mn2+ dependent, 1K	-0.829	-1.77645	0.045001
240050_s_at	Hs.43744.0	PPM1K	protein phosphatase, Mg2+/Mn2+ dependent, 1K	-2.12	-4.34694	0.046542
242752_at	Hs.43744.1	PPM1K	protein phosphatase, Mg2+/Mn2+ dependent, 1K	-2.217	-4.64926	0.041731
228108_at	Hs.19339.0	PPM1L	protein phosphatase, Mg2+/Mn2+ dependent, 1L	-1.2	-2.2974	0.001013
221088_s_at	g8923072	PPP1R9A	protein phosphatase 1, regulatory subunit 9A	-1.181	-2.26734	0.002751
231966_at	Hs.247748.1	PPP1R9A	protein phosphatase 1, regulatory subunit 9A	-1.979	-3.9422	0.002604
228494_at	Hs.21816.0	PPP1R9A	protein phosphatase 1, regulatory subunit 9A	-1.996	-3.98893	0.005337
1569894_at	Hs2.385480.1	PPP2R3C	protein phosphatase 2, regulatory subunit B'', gamma	-1.494	-2.81669	0.019775
201877_s_at	g4506022	PPP2R5C	protein phosphatase 2, regulatory subunit B', gamma	-1.369	-2.58291	0.004833
203338_at	g5453955	PPP2R5E	protein phosphatase 2, regulatory subunit B', epsilon isoform	-0.858	-1.81252	0.041701
228070_at	Hs.122684.1	PPP2R5E	protein phosphatase 2, regulatory subunit B', epsilon isoform	-0.901	-1.86736	0.041064
227630_at	Hs.283362.0	PPP2R5E	protein phosphatase 2, regulatory subunit B', epsilon isoform	-1.005	-2.00694	0.032799
229322_at	Hs.319817.0	PPP2R5E	protein phosphatase 2, regulatory subunit B', epsilon isoform	-1.217	-2.32463	0.025947
202457_s_at	Hs.272458.0	PPP3CA	protein phosphatase 3, catalytic subunit, alpha isozyme	-0.724	-1.65176	0.032171
223733_s_at	g7770122	PPP4R1L	protein phosphatase 4, regulatory subunit 1-like (pseudogene)	-1.198	-2.29421	0.025054
230015_at	Hs.42658.0	PRCD	progressive rod-cone degeneration	-1.644	-3.12531	0.016287
235764_at	Hs.95071.0	PRDM5	PR domain containing 5	-1.804	-3.49187	0.03589
238489_at	Hs.139293.0	PRKAA2	protein kinase, AMP-activated, alpha 2 catalytic subunit	-0.902	-1.86865	0.047557
227892_at	Hs.127301.0	PRKAA2	protein kinase, AMP-activated, alpha 2 catalytic subunit	-1.033	-2.04627	0.019062
238441_at	Hs.86379.0	PRKAA2	protein kinase, AMP-activated, alpha 2 catalytic subunit	-1.399	-2.63719	0.022485
202741_at	Hs.87773.0	PRKACB	protein kinase, cAMP-dependent, catalytic, beta	-1.552	-2.93223	0.0046
202742_s_at	g4506056	PRKACB	protein kinase, cAMP-dependent, catalytic, beta	-1.68	-3.20428	0.006717
218764_at	g13129041	PRKCH	protein kinase C, eta	-0.853	-1.80625	0.011892
206099_at	g5453971	PRKCH	protein kinase C, eta	-1.042	-2.05908	0.006155
205880_at	g4506074	PRKD1	protein kinase D1	-1.684	-3.21318	0.000795
211380_s_at	g1255601	PRKG1	protein kinase, cGMP-dependent, type I	-1.147	-2.21453	0.013693
207119_at	g10835241	PRKG1	protein kinase, cGMP-dependent, type I	-1.462	-2.7549	0.011223
228396_at	Hs.22860.0	PRKG1	protein kinase, cGMP-dependent, type I	-1.547	-2.92209	0.007687
210384_at	g1710262	PRMT2	protein arginine methyltransferase 2	-0.836	-1.78509	0.039711
228722_at	Hs.235887.5	PRMT2	protein arginine methyltransferase 2	-1.528	-2.88386	0.019095
204304_s_at	g5174386	PROM1	prominin 1	-4.066	-16.749	0.000866
207808_s_at	g4506116	PROS1	protein S (alpha)	-2.522	-5.74378	0.000643
242119_at	Hs.257512.0	PROX1	prospero homeobox 1	-0.734	-1.66324	0.031542
234804_at	Hs.272378.0	PROX2	prospero homeobox 2	-0.971	-1.9602	0.008996
1558097_at	Hs2.349938.1	PRR14L	proline rich 14-like	-0.965	-1.95206	0.032091
238008_at	Hs.119062.0	PRR18	proline rich 18	-1.253	-2.38337	0.009716
238513_at	Hs.25978.0	PRRG4	proline rich Gla (G-carboxyglutamic acid) 4 (transmembrane)	-2.052	-4.1468	0.006411
229073_at	Hs.116750.0	PRTG	protogenin	-0.663	-1.58337	0.014354
1567440_at	Hs2.334580.2	PSEN1	presenilin 1	-1.064	-2.09072	0.013363
1567443_x_at	Hs2.334580.2	PSEN1	presenilin 1	-1.094	-2.13465	0.015058
203460_s_at	g7549812	PSEN1	presenilin 1	-1.446	-2.72452	0.02666
207782_s_at	g7549814	PSEN1	presenilin 1	-1.472	-2.77406	0.018868
226577_at	Hs.16648.0	PSEN1	presenilin 1	-1.593	-3.01676	0.002086
238816_at	Hs.128490.0	PSEN1	presenilin 1	-1.796	-3.47256	0.000659
209337_at	g3283351	PSIP1	PC4 and SFRS1 interacting protein 1	-0.832	-1.78015	0.034269
205961_s_at	g4758869	PSIP1	PC4 and SFRS1 interacting protein 1	-1.086	-2.12285	0.024607
232648_at	Hs.270791.0	PSMA3	proteasome subunit alpha 3	-0.959	-1.94396	0.02476
201274_at	g4506186	PSMA5	proteasome subunit alpha 5	-0.971	-1.9602	0.008248
242055_at	Hs.247572.0	PSMG4	proteasome (prosome, macropain) assembly chaperone 4	-0.751	-1.68296	0.037561
201896_s_at	g12655140	PSRC1	proline/serine-rich coiled-coil 1	-1.363	-2.57219	0.007626
234689_at	Hs.307116.0	PTCHD4	patched domain containing 4	-1.053	-2.07484	0.02016
224950_at	Hs.300591.0	PTGFRN	prostaglandin F2 receptor inhibitor	-1.201	-2.29899	0.003393
224937_at	Hs.300591.0	PTGFRN	prostaglandin F2 receptor inhibitor	-1.497	-2.82255	0.002714
204748_at	g4506264	PTGS2	prostaglandin-endoperoxide synthase 2 (prostaglandin G/H synthase and cyclooxygenase)	-1.035	-2.04911	0.026333
1554997_a_at	Hs2.196384.2	PTGS2	prostaglandin-endoperoxide synthase 2 (prostaglandin G/H synthase and cyclooxygenase)	-1.158	-2.23148	0.037436
206482_at	g5174646	PTK6	protein tyrosine kinase 6	-0.862	-1.81756	0.022913
1320_at	X79510cds	PTPN21	protein tyrosine phosphatase, non-receptor type 21	-1.134	-2.19466	0.003142
40524_at	4920281	PTPN21	protein tyrosine phosphatase, non-receptor type 21	-1.154	-2.2253	0.000507
205438_at	g5902031	PTPN21	protein tyrosine phosphatase, non-receptor type 21	-1.346	-2.54206	0.003952
226380_at	Hs.8861.0	PTPN21	protein tyrosine phosphatase, non-receptor type 21	-1.354	-2.5562	0.00443
205712_at	g4506308	PTPRD	protein tyrosine phosphatase, receptor type, D	-1.256	-2.38833	0.003206
214043_at	Hs.323079.1	PTPRD	protein tyrosine phosphatase, receptor type, D	-1.514	-2.85601	0.005095
213362_at	Hs.323079.0	PTPRD	protein tyrosine phosphatase, receptor type, D	-1.693	-3.23328	0.004142
203029_s_at	g11386148	PTPRN2	protein tyrosine phosphatase, receptor type, N polypeptide 2	-0.767	-1.70173	0.041279
1554199_at	Hs2.258609.7	PTPRO	protein tyrosine phosphatase, receptor type, O	-2.942	-7.68476	7.4e-05
211600_at	g885925	PTPRO	protein tyrosine phosphatase, receptor type, O	-8.625	-394.806	4.4e-05
226587_at	Hs.22543.0	PWAR6	Prader Willi/Angelman region RNA 6	-0.934	-1.91057	0.032462
202990_at	g4506352	PYGL	phosphorylase, glycogen, liver	-1.648	-3.13399	0.002104
228384_s_at	Hs.97031.0	PYROXD2	pyridine nucleotide-disulphide oxidoreductase domain 2	-1.387	-2.61534	0.009439
205174_s_at	g9257235	QPCT	glutaminyl-peptide cyclotransferase	-1.29	-2.44528	0.008397
225746_at	Hs.3454.0	RAB11FIP4	RAB11 family interacting protein 4 (class II)	-0.67	-1.59107	0.025968
221810_at	Hs.21349.0	RAB15	RAB15, member RAS oncogene family	-1.11	-2.15846	0.007542
59697_at	4855188_RC	RAB15	RAB15, member RAS oncogene family	-1.218	-2.32624	0.006305
235766_x_at	Hs.165337.1	RAB27A	RAB27A, member RAS oncogene family	-1.251	-2.38006	0.026133
222294_s_at	Hs.165337.0	RAB27A	RAB27A, member RAS oncogene family	-1.265	-2.40327	0.028105
209515_s_at	g4887230	RAB27A	RAB27A, member RAS oncogene family	-1.364	-2.57398	0.024485
229300_at	Hs.4290.0	RAB3C	RAB3C, member RAS oncogene family	-0.802	-1.74352	0.022728
238853_at	Hs.283645.0	RAB3IP	RAB3A interacting protein	-1.046	-2.0648	0.010584
203582_s_at	g4759001	RAB4A	RAB4A, member RAS oncogene family	-2.07	-4.19887	0.00699
203581_at	g12803248	RAB4A	RAB4A, member RAS oncogene family	-2.444	-5.44148	0.000608
221792_at	Hs.89981.3	RAB6B	RAB6B, member RAS oncogene family	-1.043	-2.06051	0.011602
210255_at	g2801404	RAD51B	RAD51 paralog B	-0.673	-1.59438	0.040892
1554496_at	Hs2.100669.3	RAD51B	RAD51 paralog B	-0.825	-1.77154	0.034619
202052_s_at	g13470085	RAI14	retinoic acid induced 14	-0.647	-1.56591	0.011157
213049_at	Hs.167031.0	RALGAPA1	Ral GTPase activating protein, alpha subunit 1 (catalytic)	-0.656	-1.57571	0.04415
231826_at	Hs.15978.0	RALGAPA2	Ral GTPase activating protein, alpha subunit 2 (catalytic)	-1.058	-2.08204	0.006767
225499_at	Hs.17235.0	RALGAPA2	Ral GTPase activating protein, alpha subunit 2 (catalytic)	-1.29	-2.44528	0.005346
205779_at	g5032020	RAMP2	receptor (G protein-coupled) activity modifying protein 2	-1.189	-2.27995	0.022773
202362_at	g4506412	RAP1A	RAP1A, member of RAS oncogene family	-1.156	-2.22839	0.032426
228548_at	Hs.306647.0	RAP1A	RAP1A, member of RAS oncogene family	-1.408	-2.65369	0.015141
229905_at	Hs.37282.0	RAP1GDS1	RAP1, GTP-GDP dissociation stimulator 1	-0.93	-1.90528	0.012606
209444_at	g12804812	RAP1GDS1	RAP1, GTP-GDP dissociation stimulator 1	-1.213	-2.31819	0.006485
217457_s_at	Hs.7940.1	RAP1GDS1	RAP1, GTP-GDP dissociation stimulator 1	-1.227	-2.3408	0.004478
215987_at	Hs.154545.1	RAPGEF2	Rap guanine nucleotide exchange factor 2	-0.66	-1.58008	0.04523
205651_x_at	g5901913	RAPGEF4	Rap guanine nucleotide exchange factor 4	-2.911	-7.52139	0.007369
226392_at	Hs.98445.0	RASA2	RAS p21 protein activator 2	-1.228	-2.34242	0.00418
206636_at	g12545407	RASA2	RAS p21 protein activator 2	-1.229	-2.34404	0.000959
230669_at	Hs.122658.0	RASA2	RAS p21 protein activator 2	-1.65	-3.13834	0.00887
223467_at	g4959037	RASD1	RAS, dexamethasone-induced 1	-2.118	-4.34092	0.016652
228109_at	Hs.187497.0	RASGRF2	Ras protein-specific guanine nucleotide-releasing factor 2	-1.058	-2.08204	0.03636
203185_at	g7661963	RASSF2	Ras association (RalGDS/AF-6) domain family member 2	-1.612	-3.05675	0.014156
212104_s_at	Hs.5011.1	RBFOX2	RNA binding protein, fox-1 homolog (C. elegans) 2	-0.71	-1.6358	0.019832
216215_s_at	Hs.5011.3	RBFOX2	RNA binding protein, fox-1 homolog (C. elegans) 2	-0.863	-1.81882	0.019291
213898_at	Hs.5011.2	RBFOX2	RNA binding protein, fox-1 homolog (C. elegans) 2	-0.955	-1.93858	0.031479
213901_x_at	Hs.5011.2	RBFOX2	RNA binding protein, fox-1 homolog (C. elegans) 2	-1.119	-2.17196	0.006936
228455_at	Hs.126465.0	RBM15	RNA binding motif protein 15	-1.377	-2.59728	0.004091
227223_at	Hs.145696.2	RBM39	RNA binding motif protein 39	-1.126	-2.18253	0.03486
226404_at	Hs.145696.3	RBM39	RNA binding motif protein 39	-1.33	-2.51403	0.008402
243038_at	Hs.206228.0	RBM43	RNA binding motif protein 43	-1.066	-2.09362	0.01988
228304_at	Hs.20255.0	RBM43	RNA binding motif protein 43	-1.69	-3.22657	0.011039
242137_at	Hs.151145.0	RBMS3	RNA binding motif, single stranded interacting protein 3	-1.272	-2.41496	0.003995
235570_at	Hs.101689.0	RBMS3	RNA binding motif, single stranded interacting protein 3	-1.736	-3.3311	0.000443
238447_at	Hs.126083.0	RBMS3	RNA binding motif, single stranded interacting protein 3	-2.032	-4.08971	0.029595
222049_s_at	Hs.76461.1	RBP4	retinol binding protein 4, plasma	-1.227	-2.3408	0.008698
219140_s_at	g8400727	RBP4	retinol binding protein 4, plasma	-1.458	-2.74727	0.007519
238066_at	Hs.292718.0	RBP7	retinol binding protein 7, cellular	-1.36	-2.56685	0.032366
217776_at	g9622123	RDH11	retinol dehydrogenase 11 (all-trans/9-cis/11-cis)	-0.721	-1.64832	0.033733
217042_at	Hs.226007.0	RDH11	retinol dehydrogenase 11 (all-trans/9-cis/11-cis)	-1.012	-2.0167	0.037354
223447_at	g12621025	REG4	regenerating islet-derived family, member 4	-1.858	-3.62505	0.018825
227425_at	Hs.5740.0	REPS2	RALBP1 associated Eps domain containing 2	-1.086	-2.12285	0.039908
242571_at	Hs.257661.0	REPS2	RALBP1 associated Eps domain containing 2	-1.747	-3.3566	0.001575
211421_s_at	g190699	RET	ret proto-oncogene	-0.894	-1.85832	0.045586
207936_x_at	g5730012	RFPL3	ret finger protein-like 3	-0.687	-1.60993	0.030856
214409_at	Hs.274285.0	RFPL3S	RFPL3 antisense	-1.996	-3.98893	0.007158
238810_at	Hs.121152.0	RFX3	regulatory factor X, 3 (influences HLA class II expression)	-2.108	-4.31093	0.003451
243868_at	Hs.163853.0	RFX3	regulatory factor X, 3 (influences HLA class II expression)	-2.614	-6.12199	0.001445
230403_at	Hs.7154.0	RFX3	regulatory factor X, 3 (influences HLA class II expression)	-3.366	-10.3102	0.001768
218723_s_at	g7662650	RGCC	regulator of cell cycle	-1.618	-3.06949	0.013821
209568_s_at	g7682470	RGL1	ral guanine nucleotide dissociation stimulator-like 1	-1.421	-2.67771	0.001125
209110_s_at	g4886476	RGL2	ral guanine nucleotide dissociation stimulator-like 2	-0.846	-1.79751	0.010369
228877_at	Hs.127826.0	RGL3	ral guanine nucleotide dissociation stimulator-like 3	-0.758	-1.69114	0.025828
203169_at	g7662029	RGP1	RGP1 homolog, RAB6A GEF complex partner 1	-0.823	-1.76908	0.015487
1555033_a_at	Hs2.78281.6	RGS12	regulator of G-protein signaling 12	-0.815	-1.7593	0.032366
242079_at	Hs.194461.0	RGS12	regulator of G-protein signaling 12	-0.965	-1.95206	0.00959
1555022_at	Hs2.78281.5	RGS12	regulator of G-protein signaling 12	-1.029	-2.04061	0.042574
239744_at	Hs.31444.0	RGS3	regulator of G-protein signaling 3	-1.123	-2.17799	0.016253
206518_s_at	g4506520	RGS9	regulator of G-protein signaling 9	-1.226	-2.33918	0.010495
226945_at	Hs.49359.1	RHBDD1	rhomboid domain containing 1	-1.12	-2.17347	0.014559
226948_at	Hs.49359.1	RHBDD1	rhomboid domain containing 1	-1.297	-2.45717	0.001192
212099_at	Hs.204354.0	RHOB	ras homolog family member B	-1.277	-2.42335	0.002604
235742_at	Hs.153699.0	RHOC	ras homolog family member C	-1.017	-2.02371	0.014514
200885_at	g4885066	RHOC	ras homolog family member C	-1.285	-2.43682	0.033302
219045_at	g9506666	RHOF	ras homolog family member F (in filopodia)	-0.931	-1.9066	0.035002
1555234_a_at	Hs2.243010.2	RHOJ	ras homolog family member J	-1.637	-3.11018	0.029112
238905_at	Hs.270219.0	RHOJ	ras homolog family member J	-2.245	-4.74037	0.014213
235131_at	Hs.243010.0	RHOJ	ras homolog family member J	-2.361	-5.13726	0.015515
238906_s_at	Hs.270219.0	RHOJ	ras homolog family member J	-2.798	-6.95476	0.011885
243481_at	Hs.249989.0	RHOJ	ras homolog family member J	-2.947	-7.71144	0.018944
1555233_at	Hs2.243010.2	RHOJ	ras homolog family member J	-3.045	-8.25347	0.005592
235489_at	Hs.243010.1	RHOJ	ras homolog family member J	-4.002	-16.0222	0.005254
223826_s_at	g12053254	RIC1	RIC1 homolog, RAB6A GEF complex partner 1	-0.665	-1.58557	0.010767
226222_at	Hs.279556.1	RIC1	RIC1 homolog, RAB6A GEF complex partner 1	-0.837	-1.78633	0.013233
236376_at	Hs.218260.0	RIMKLA	ribosomal modification protein rimK-like family member A	-1.296	-2.45547	0.035867
236884_at	Hs.332260.0	RIMKLA	ribosomal modification protein rimK-like family member A	-1.956	-3.87985	0.001323
235948_at	Hs.126755.0	RIMKLA	ribosomal modification protein rimK-like family member A	-2.067	-4.19014	0.008591
213397_x_at	Hs.74711.2	RNASE4	ribonuclease, RNase A family, 4	-1.839	-3.57762	0.000334
205158_at	g4506556	RNASE4	ribonuclease, RNase A family, 4	-1.872	-3.6604	0.000618
229285_at	Hs.56156.0	RNASEL	ribonuclease L (2',5'-oligoisoadenylate synthetase-dependent)	-0.947	-1.92786	0.022935
221287_at	g10863928	RNASEL	ribonuclease L (2',5'-oligoisoadenylate synthetase-dependent)	-0.986	-1.98069	0.049182
223603_at	g5931593	RNF112	ring finger protein 112	-1.967	-3.90954	0.002455
219263_at	g13375696	RNF128	ring finger protein 128, E3 ubiquitin protein ligase	-3.712	-13.1046	0.00041
1565544_at	Hs2.271029.1	RNF141	ring finger protein 141	-1.383	-2.6081	0.006526
204040_at	g7661955	RNF144A	ring finger protein 144A	-0.976	-1.967	0.017726
229024_at	Hs.55424.0	RNF150	ring finger protein 150	-1.439	-2.71133	0.025853
232501_at	Hs.55424.1	RNF150	ring finger protein 150	-1.545	-2.91804	0.000608
227657_at	Hs.43149.0	RNF150	ring finger protein 150	-1.926	-3.8	0.004016
236038_at	Hs.42746.0	RNF150	ring finger protein 150	-2.835	-7.13543	0.007339
242033_at	Hs.109843.0	RNF180	ring finger protein 180	-0.907	-1.87514	0.02372
1555870_at	Hs2.101077.1	RNF207	ring finger protein 207	-1.71	-3.27161	0.01914
240320_at	Hs.130332.0	RNF212B	ring finger protein 212B	-1.926	-3.8	0.000815
230000_at	Hs.17767.1	RNF213	ring finger protein 213	-0.701	-1.62563	0.02929
232155_at	Hs.124135.0	RNF213	ring finger protein 213	-1.043	-2.06051	0.014739
225931_s_at	Hs.17767.0	RNF213	ring finger protein 213	-1.127	-2.18404	0.001752
235492_at	Hs.307526.0	RNF217	ring finger protein 217	-0.776	-1.71238	0.008542
232100_at	Hs.288735.0	RNF217	ring finger protein 217	-1.427	-2.68887	0.004682
226885_at	Hs.12876.0	RNF217	ring finger protein 217	-1.534	-2.89588	0.001382
1554642_at	Hs2.146037.3	RNF32	ring finger protein 32	-0.743	-1.67365	0.021593
218528_s_at	g12232470	RNF38	ring finger protein 38	-1.049	-2.0691	0.035429
221908_at	Hs.18653.0	RNFT2	ring finger protein, transmembrane 2	-1.15	-2.21914	0.018777
229903_x_at	Hs.278399.1	RNPC3	RNA binding region (RNP1, RRM) containing 3	-0.641	-1.55941	0.019872
226975_at	Hs.14235.0	RNPC3	RNA binding region (RNP1, RRM) containing 3	-0.95	-1.93187	0.004694
226766_at	Hs.31141.0	ROBO2	roundabout guidance receptor 2	-1.381	-2.60449	0.005169
205578_at	g4758841	ROR2	receptor tyrosine kinase-like orphan receptor 2	-1.154	-2.2253	0.001706
233134_at	Hs.198551.2	RPH3AL	rabphilin 3A-like (without C2 domains)	-1.806	-3.49671	0.002941
213223_at	Hs.330570.0	RPL28	ribosomal protein L28	-0.894	-1.85832	0.009872
200962_at	Hs.184014.0	RPL31	ribosomal protein L31	-0.876	-1.83528	0.042948
1558969_a_at	Hs2.262007.1	RPL32P3	ribosomal protein L32 pseudogene 3	-1.263	-2.39994	0.029501
1556062_at	Hs2.377528.1	RPP30	ribonuclease P/MRP 30kDa subunit	-1.667	-3.17554	0.002088
235309_at	Hs.9879.0	RPS15A	ribosomal protein S15a	-1.057	-2.0806	0.003049
238824_at	Hs.145569.0	RPS29	ribosomal protein S29	-1.158	-2.23148	0.011218
212912_at	Hs.184581.0	RPS6KA2	ribosomal protein S6 kinase, 90kDa, polypeptide 2	-1.27	-2.41162	0.007243
201628_s_at	g5729998	RRAGA	Ras-related GTP binding A	-0.769	-1.70409	0.016105
222788_s_at	Hs.3623.0	RSBN1	round spermatid basic protein 1	-1.018	-2.02511	0.00367
222790_s_at	Hs.3623.0	RSBN1	round spermatid basic protein 1	-1.07	-2.09943	0.008709
213694_at	Hs.3623.1	RSBN1	round spermatid basic protein 1	-1.888	-3.70122	0.001346
222789_at	Hs.3623.0	RSBN1	round spermatid basic protein 1	-1.939	-3.8344	0.002077
222791_at	Hs.3623.0	RSBN1	round spermatid basic protein 1	-1.943	-3.84504	0.00152
230695_s_at	Hs.21111.0	RSPH9	radial spoke head 9 homolog (Chlamydomonas)	-1.772	-3.41527	0.02656
210222_s_at	g12653096	RTN1	reticulon 1	-2.06	-4.16986	0.000419
203485_at	g10863934	RTN1	reticulon 1	-2.063	-4.17854	0.000596
212735_at	Hs.141296.0	RUBCN	RUN domain and cysteine-rich domain containing, Beclin 1-interacting protein	-0.763	-1.69702	0.035034
235345_at	Hs.58123.0	RUFY2	RUN and FYVE domain containing 2	-0.658	-1.57789	0.01251
213437_at	Hs.7972.2	RUFY3	RUN and FYVE domain containing 3	-0.907	-1.87514	0.00701
210251_s_at	g6563227	RUFY3	RUN and FYVE domain containing 3	-1.152	-2.22222	0.013462
227802_at	Hs.35088.0	RUFY3	RUN and FYVE domain containing 3	-1.273	-2.41664	0.000866
229334_at	Hs.35088.1	RUFY3	RUN and FYVE domain containing 3	-1.278	-2.42503	0.001323
213430_at	Hs.7972.2	RUFY3	RUN and FYVE domain containing 3	-1.635	-3.10588	0.000773
213555_at	Hs.26771.0	RWDD2A	RWD domain containing 2A	-1.182	-2.26891	0.009131
229661_at	Hs.189095.0	SALL4	spalt-like transcription factor 4	-0.715	-1.64148	0.023086
238673_at	Hs.132208.0	SAMD12	sterile alpha motif domain containing 12	-2.191	-4.56622	0.000663
229402_at	Hs.105069.0	SAMD13	sterile alpha motif domain containing 13	-1.342	-2.53503	0.014958
236782_at	Hs.130304.0	SAMD3	sterile alpha motif domain containing 3	-0.747	-1.6783	0.024699
228653_at	Hs.110406.0	SAMD5	sterile alpha motif domain containing 5	-1.804	-3.49187	0.006341
242626_at	Hs.188724.0	SAMD5	sterile alpha motif domain containing 5	-2.105	-4.30198	0.014148
213257_at	Hs.128759.0	SARM1	sterile alpha and TIR motif containing 1	-0.749	-1.68063	0.030325
200802_at	g5730028	SARS	seryl-tRNA synthetase	-1.032	-2.04486	0.006689
231894_at	Hs.18498.0	SARS	seryl-tRNA synthetase	-2.068	-4.19305	0.001278
203455_s_at	g4506788	SAT1	spermidine/spermine N1-acetyltransferase 1	-1.408	-2.65369	0.006398
210592_s_at	g338335	SAT1	spermidine/spermine N1-acetyltransferase 1	-2.064	-4.18144	0.002516
213988_s_at	Hs.28491.3	SAT1	spermidine/spermine N1-acetyltransferase 1	-2.459	-5.49835	0.000948
222573_s_at	Hs.288906.0	SAV1	salvador family WW domain containing protein 1	-0.952	-1.93455	0.014148
234491_s_at	Hs.288906.1	SAV1	salvador family WW domain containing protein 1	-1.077	-2.10964	0.001409
218276_s_at	g11141888	SAV1	salvador family WW domain containing protein 1	-1.115	-2.16595	0.001189
213383_at	Hs.296406.1	SBF1	SET binding factor 1	-0.733	-1.66209	0.036399
215064_at	Hs.287749.0	SC5D	sterol-C5-desaturase	-1.39	-2.62079	0.003117
228174_at	Hs.48610.0	SCAI	suppressor of cancer cell invasion	-0.701	-1.62563	0.039256
224983_at	Hs.85963.1	SCARB2	scavenger receptor class B, member 2	-0.67	-1.59107	0.034184
201647_s_at	g5031630	SCARB2	scavenger receptor class B, member 2	-0.937	-1.91454	0.017549
201646_at	Hs.323567.0	SCARB2	scavenger receptor class B, member 2	-1.101	-2.14503	0.013291
1555021_a_at	Hs2.57735.3	SCARF1	scavenger receptor class F, member 1	-1.145	-2.21146	0.049346
206995_x_at	g4507202	SCARF1	scavenger receptor class F, member 1	-4.088	-17.0063	0.002541
224901_at	Hs.247474.2	SCD5	stearoyl-CoA desaturase 5	-0.767	-1.70173	0.025237
215548_s_at	Hs.27023.1	SCFD1	sec1 family domain containing 1	-0.912	-1.88165	0.010648
204722_at	Hs.4865.0	SCN3B	sodium channel, voltage gated, type III beta subunit	-1.12	-2.17347	0.010953
235969_at	Hs.26299.0	SCN8A	sodium channel, voltage gated, type VIII alpha subunit	-1.112	-2.16145	0.008452
233988_x_at	Hs.247896.0	SCUBE1	signal peptide, CUB domain, EGF-like 1	-0.955	-1.93858	0.007204
1552388_at	Hs2.350773.1	SCUBE1	signal peptide, CUB domain, EGF-like 1	-1.674	-3.19098	0.010615
209889_at	g8650513	SEC31B	SEC31 homolog B, COPII coat complex component	-1.285	-2.43682	0.024629
244700_at	Hs.191887.0	SEC61B	Sec61 translocon beta subunit	-0.904	-1.87125	0.043963
202062_s_at	g4826995	SEL1L	sel-1 suppressor of lin-12-like (C. elegans)	-1.12	-2.17347	0.046669
234725_s_at	Hs.9598.1	SEMA4B	sema domain, immunoglobulin domain (Ig), transmembrane domain (TM) and short cytoplasmic domain, (semaphorin) 4B	-1.522	-2.87189	0.048
203528_at	g5454049	SEMA4D	sema domain, immunoglobulin domain (Ig), transmembrane domain (TM) and short cytoplasmic domain, (semaphorin) 4D	-0.739	-1.66902	0.005022
223449_at	g9963852	SEMA6A	sema domain, transmembrane domain (TM), and cytoplasmic domain, (semaphorin) 6A	-0.975	-1.96564	0.015319
222523_at	Hs.3355.0	SENP2	SUMO1/sentrin/SMT3 specific peptidase 2	-0.653	-1.57243	0.041922
228380_at	Hs.86945.0	SENP2	SUMO1/sentrin/SMT3 specific peptidase 2	-0.957	-1.94127	0.036924
208999_at	Hs.80712.0	SEPT8	septin 8	-0.733	-1.66209	0.040439
226627_at	Hs.80712.1	SEPT8	septin 8	-1.43	-2.69447	0.004051
220626_at	g7705878	SERPINA10	serpin peptidase inhibitor, clade A (alpha-1 antiproteinase, antitrypsin), member 10	-0.795	-1.73508	0.046542
202376_at	g9665246	SERPINA3	serpin peptidase inhibitor, clade A (alpha-1 antiproteinase, antitrypsin), member 3	-2.063	-4.17854	0.016413
205576_at	g7262380	SERPIND1	serpin peptidase inhibitor, clade D (heparin cofactor), member 1	-2.601	-6.06707	0.001159
205352_at	g4826903	SERPINI1	serpin peptidase inhibitor, clade I (neuroserpin), member 1	-1.865	-3.64268	0.001184
244653_at	Hs.160208.0	SETD7	SET domain containing (lysine methyltransferase) 7	-0.703	-1.62789	0.045757
36545_s_at	4874038	SFI1	SFI1 centrin binding protein	-0.676	-1.5977	0.01725
220974_x_at	g13569945	SFXN3	sideroflexin 3	-0.778	-1.71475	0.048963
205121_at	g4506912	SGCB	sarcoglycan beta	-1.077	-2.10964	0.025379
201739_at	g5032090	SGK1	serum/glucocorticoid regulated kinase 1	-1.474	-2.77791	0.003753
223391_at	Hs.24678.0	SGPP1	sphingosine-1-phosphate phosphatase 1	-1.058	-2.08204	0.013002
221268_s_at	g13540568	SGPP1	sphingosine-1-phosphate phosphatase 1	-1.143	-2.2084	0.033399
209371_s_at	g1843391	SH3BP2	SH3-domain binding protein 2	-1.482	-2.79336	0.002455
217257_at	Hs.233617.0	SH3BP2	SH3-domain binding protein 2	-1.707	-3.26481	0.002782
205751_at	g4506930	SH3GL2	SH3-domain GRB2-like 2	-1.511	-2.85008	0.031845
211565_at	g2921415	SH3GL3	SH3-domain GRB2-like 3	-0.667	-1.58777	0.038202
209090_s_at	Hs.136309.0	SH3GLB1	SH3-domain GRB2-like endophilin B1	-1.386	-2.61353	0.031942
224817_at	Hs.146233.0	SH3PXD2A	SH3 and PX domains 2A	-0.761	-1.69466	0.018
213252_at	Hs.173448.1	SH3PXD2A	SH3 and PX domains 2A	-0.956	-1.93992	0.022231
213464_at	Hs.30965.0	SHC2	SHC (Src homology 2 domain containing) transforming protein 2	-1.467	-2.76446	0.002624
229824_at	Hs.4257.0	SHC3	SHC (Src homology 2 domain containing) transforming protein 3	-1.221	-2.33108	0.020744
228922_at	Hs.184864.0	SHF	Src homology 2 domain containing F	-0.634	-1.55186	0.046347
232404_at	Hs.272565.0	SHROOM4	shroom family member 4	-1.751	-3.36592	0.01806
221802_s_at	Hs.23740.1	SHTN1	shootin 1	-0.707	-1.63241	0.014354
204665_at	Hs.288106.0	SIKE1	suppressor of IKBKE 1	-1.495	-2.81864	0.030693
228026_at	Hs.24808.0	SIKE1	suppressor of IKBKE 1	-1.807	-3.49914	0.000303
221705_s_at	g13543553	SIKE1	suppressor of IKBKE 1	-1.922	-3.78948	0.000334
204666_s_at	g13376618	SIKE1	suppressor of IKBKE 1	-1.937	-3.82909	0.001633
235294_at	Hs.222442.0	SIKE1	suppressor of IKBKE 1	-2	-4	0.001441
206558_at	g7108363	SIM2	single-minded family bHLH transcription factor 2	-1.032	-2.04486	0.007449
202254_at	Hs.172180.0	SIPA1L1	signal-induced proliferation-associated 1 like 1	-1.059	-2.08349	0.009872
225056_at	Hs.18760.0	SIPA1L2	signal-induced proliferation-associated 1 like 2	-0.893	-1.85703	0.00573
221010_s_at	g13787214	SIRT5	sirtuin 5	-0.662	-1.58227	0.02713
229796_at	Hs.97849.0	SIX4	SIX homeobox 4	-1.498	-2.82451	0.015691
231797_at	Hs.279004.0	SIX4	SIX homeobox 4	-1.657	-3.1536	0.021535
205790_at	g4506964	SKAP1	src kinase associated phosphoprotein 1	-1.93	-3.81055	0.029389
207185_at	g4506970	SLC10A1	solute carrier family 10 (sodium/bile acid cotransporter), member 1	-1.669	-3.17994	0.033063
210040_at	g12003226	SLC12A5	solute carrier family 12 (potassium/chloride transporter), member 5	-1.654	-3.14705	0.006314
220740_s_at	g4826779	SLC12A6	solute carrier family 12 (potassium/chloride transporter), member 6	-1.398	-2.63536	0.00628
226741_at	Hs.250905.2	SLC12A6	solute carrier family 12 (potassium/chloride transporter), member 6	-1.435	-2.70382	0.012743
223596_at	g5106522	SLC12A6	solute carrier family 12 (potassium/chloride transporter), member 6	-1.588	-3.00632	0.003681
205243_at	Hs.102867.0	SLC13A3	solute carrier family 13 (sodium-dependent dicarboxylate transporter), member 3	-1.469	-2.7683	0.026741
205316_at	Hs.182575.0	SLC15A2	solute carrier family 15 (oligopeptide transporter), member 2	-1.909	-3.75549	0.0052
202234_s_at	Hs.75231.0	SLC16A1	solute carrier family 16 (monocarboxylate transporter), member 1	-0.715	-1.64148	0.037156
205234_at	g4759113	SLC16A4	solute carrier family 16, member 4	-1.669	-3.17994	6.5e-05
213590_at	Hs.90911.1	SLC16A5	solute carrier family 16 (monocarboxylate transporter), member 5	-0.712	-1.63807	0.015755
206396_at	g4759121	SLC1A1	solute carrier family 1 (neuronal/epithelial high affinity glutamate transporter, system Xag), member 1	-1.249	-2.37677	0.019773
213664_at	Hs.91139.1	SLC1A1	solute carrier family 1 (neuronal/epithelial high affinity glutamate transporter, system Xag), member 1	-2.365	-5.15153	0.003633
244377_at	Hs.184513.0	SLC1A4	solute carrier family 1 (glutamate/neutral amino acid transporter), member 4	-0.882	-1.84293	0.039783
228497_at	Hs.21710.0	SLC22A15	solute carrier family 22, member 15	-2.345	-5.0806	0.000608
232672_x_at	Hs.44268.1	SLC24A5	solute carrier family 24 (sodium/potassium/calcium exchanger), member 5	-1.814	-3.51616	0.000959
1569121_at	Hs2.396821.1	SLC25A24	solute carrier family 25 (mitochondrial carrier; phosphate carrier), member 24	-0.854	-1.80751	0.042252
204342_at	g9558726	SLC25A24	solute carrier family 25 (mitochondrial carrier; phosphate carrier), member 24	-0.884	-1.84548	0.022692
1552774_a_at	Hs2.40510.1	SLC25A27	solute carrier family 25, member 27	-1.176	-2.25949	0.043898
225305_at	Hs.27769.0	SLC25A29	solute carrier family 25 (mitochondrial carnitine/acylcarnitine carrier), member 29	-0.65	-1.56917	0.015573
225306_s_at	Hs.27769.0	SLC25A29	solute carrier family 25 (mitochondrial carnitine/acylcarnitine carrier), member 29	-0.836	-1.78509	0.008571
231664_at	Hs.27769.1	SLC25A29	solute carrier family 25 (mitochondrial carnitine/acylcarnitine carrier), member 29	-0.908	-1.87644	0.003049
201919_at	Hs.42484.0	SLC25A36	solute carrier family 25 (pyrimidine nucleotide carrier), member 36	-0.84	-1.79005	0.03559
201918_at	Hs.42484.0	SLC25A36	solute carrier family 25 (pyrimidine nucleotide carrier), member 36	-0.915	-1.88557	0.036242
201917_s_at	Hs.42484.0	SLC25A36	solute carrier family 25 (pyrimidine nucleotide carrier), member 36	-0.958	-1.94261	0.017148
237741_at	Hs.144130.0	SLC25A36	solute carrier family 25 (pyrimidine nucleotide carrier), member 36	-1.165	-2.24233	0.03486
226179_at	Hs.34549.0	SLC25A37	solute carrier family 25 (mitochondrial iron transporter), member 37	-0.72	-1.64718	0.032674
242274_x_at	Hs.310574.0	SLC25A42	solute carrier family 25, member 42	-1.471	-2.77214	0.002165
1563498_s_at	Hs2.407102.1	SLC25A45	solute carrier family 25, member 45	-1.493	-2.81474	0.044184
232092_at	Hs.274549.0	SLC25A51	solute carrier family 25, member 51	-1.059	-2.08349	0.003556
226679_at	Hs.4866.0	SLC26A11	solute carrier family 26 (anion exchanger), member 11	-2.068	-4.19305	0.001272
239006_at	Hs.150178.0	SLC26A7	solute carrier family 26 (anion exchanger), member 7	-0.657	-1.5768	0.032103
205769_at	g4503652	SLC27A2	solute carrier family 27 (fatty acid transporter), member 2	-1.438	-2.70945	0.014448
205768_s_at	g4503652	SLC27A2	solute carrier family 27 (fatty acid transporter), member 2	-1.908	-3.75288	0.000727
219932_at	g13325054	SLC27A6	solute carrier family 27 (fatty acid transporter), member 6	-3.037	-8.20783	0.00058
221024_s_at	g13540546	SLC2A10	solute carrier family 2 (facilitated glucose transporter), member 10	-1.215	-2.32141	0.038255
202497_x_at	Hs.7594.0	SLC2A3	solute carrier family 2 (facilitated glucose transporter), member 3	-1.474	-2.77791	0.005479
202499_s_at	g5902089	SLC2A3	solute carrier family 2 (facilitated glucose transporter), member 3	-2.523	-5.74776	0.00652
202498_s_at	Hs.7594.0	SLC2A3	solute carrier family 2 (facilitated glucose transporter), member 3	-2.731	-6.63916	0.004101
227193_at	Hs.23023.0	SLC30A4	solute carrier family 30 (zinc transporter), member 4	-1.014	-2.0195	0.036032
243724_at	Hs.294132.0	SLC33A1	solute carrier family 33 (acetyl-CoA transporter), member 1	-1.035	-2.04911	0.006689
220924_s_at	g9506836	SLC38A2	solute carrier family 38, member 2	-0.748	-1.67946	0.00769
218041_x_at	g8924006	SLC38A2	solute carrier family 38, member 2	-0.766	-1.70055	0.005339
220786_s_at	g8922270	SLC38A4	solute carrier family 38, member 4	-1.428	-2.69073	0.03337
1555345_at	Hs2.165655.2	SLC38A4	solute carrier family 38, member 4	-1.639	-3.1145	0.045142
214830_at	Hs.71168.0	SLC38A6	solute carrier family 38, member 6	-0.974	-1.96428	0.03077
225295_at	Hs.24936.0	SLC39A10	solute carrier family 39 (zinc transporter), member 10	-0.91	-1.87905	0.013577
219215_s_at	g8923304	SLC39A4	solute carrier family 39 (zinc transporter), member 4	-1.503	-2.83431	0.002562
233123_at	Hs.238381.0	SLC40A1	solute carrier family 40 (iron-regulated transporter), member 1	-0.899	-1.86477	0.008941
223044_at	g12053382	SLC40A1	solute carrier family 40 (iron-regulated transporter), member 1	-3.071	-8.40356	0.000517
223798_at	g12053164	SLC41A2	solute carrier family 41 (magnesium transporter), member 2	-1.433	-2.70008	0.04212
1552782_at	Hs2.367960.1	SLC44A5	solute carrier family 44, member 5	-0.728	-1.65634	0.042685
230458_at	Hs.128740.0	SLC45A1	solute carrier family 45, member 1	-1.173	-2.2548	0.005316
214719_at	Hs.117167.0	SLC46A3	solute carrier family 46, member 3	-1.026	-2.03637	0.010699
209884_s_at	g5051627	SLC4A7	solute carrier family 4, sodium bicarbonate cotransporter, member 7	-0.663	-1.58337	0.011949
207603_at	g4507028	SLC4A7	solute carrier family 4, sodium bicarbonate cotransporter, member 7	-0.829	-1.77645	0.018501
207604_s_at	g4507028	SLC4A7	solute carrier family 4, sodium bicarbonate cotransporter, member 7	-0.919	-1.8908	0.01548
228175_at	Hs.4749.0	SLC4A8	solute carrier family 4, sodium bicarbonate cotransporter, member 8	-0.922	-1.89474	0.036321
212944_at	Hs.268016.0	SLC5A3	solute carrier family 5 (sodium/myo-inositol cotransporter), member 3	-1.097	-2.13909	0.032463
213164_at	Hs.324787.0	SLC5A3	solute carrier family 5 (sodium/myo-inositol cotransporter), member 3	-1.255	-2.38667	0.010503
213167_s_at	Hs.324787.0	SLC5A3	solute carrier family 5 (sodium/myo-inositol cotransporter), member 3	-1.269	-2.40994	0.029451
228754_at	Hs.296770.0	SLC6A6	solute carrier family 6 (neurotransmitter transporter), member 6	-0.91	-1.87905	0.016834
205920_at	g4507044	SLC6A6	solute carrier family 6 (neurotransmitter transporter), member 6	-1.092	-2.13169	0.028938
217248_s_at	Hs.22891.3	SLC7A8	solute carrier family 7 (amino acid transporter light chain, L system), member 8	-1.018	-2.02511	0.010867
1562403_a_at	Hs2.337696.3	SLC8A3	solute carrier family 8 (sodium/calcium exchanger), member 3	-1.398	-2.63536	0.045209
244561_at	Hs.170481.0	SLC9A7	solute carrier family 9, subfamily A (NHE7, cation proton antiporter 7), member 7	-0.892	-1.85575	0.010283
226550_at	Hs.91389.0	SLC9A7	solute carrier family 9, subfamily A (NHE7, cation proton antiporter 7), member 7	-0.932	-1.90792	0.002736
1558105_a_at	Hs2.91389.1	SLC9A7	solute carrier family 9, subfamily A (NHE7, cation proton antiporter 7), member 7	-1.178	-2.26263	0.001787
226743_at	Hs.235709.0	SLFN11	schlafen family member 11	-1.058	-2.08204	0.021776
1553423_a_at	Hs2.193490.1	SLFN13	schlafen family member 13	-3.131	-8.76042	0.000608
1558217_at	Hs2.193490.2	SLFN13	schlafen family member 13	-3.925	-15.1895	2e-06
238430_x_at	Hs.133526.0	SLFN5	schlafen family member 5	-1.271	-2.41329	0.026848
[truncated: 554 more rows]

## Sheet: All Differential Probes ρ0 v ρ+
Probe Set ID	Transcript ID (Array Design)	Gene Symbol	Gene Title	log2FC ρ(0CTL)/ρ(+)	Fold-Change ρ(0CTL)/ρ(+)	FDR p-value ρ(0CTL)/ρ(+)
217757_at	g6226959	A2M	alpha-2-macroglobulin	-2.798	-6.95476	0.000723
205434_s_at	Hs.135941.0	AAK1	AP2 associated kinase 1	0.889	1.85189	0.022935
228041_at	Hs.104347.0	AASDH	aminoadipate-semialdehyde dehydrogenase	-0.928	-1.90264	0.042664
209165_at	g5813798	AATF	apoptosis antagonizing transcription factor	1.062	2.08782	0.001767
209460_at	g9963907	ABAT	4-aminobutyrate aminotransferase	-1.458	-2.74727	0.028892
209459_s_at	g9963907	ABAT	4-aminobutyrate aminotransferase	-1.807	-3.49914	0.023032
216066_at	Hs.211562.1	ABCA1	ATP binding cassette subfamily A member 1	0.888	1.85061	0.021726
213353_at	Hs.180513.0	ABCA5	ATP binding cassette subfamily A member 5	-1.287	-2.4402	0.016809
241705_at	Hs.98368.0	ABCA5	ATP binding cassette subfamily A member 5	-1.492	-2.81279	0.018287
223320_s_at	g12751097	ABCB10	ATP binding cassette subfamily B member 10	0.88	1.84038	0.024832
1570505_at	Hs2.434244.1	ABCB4	ATP binding cassette subfamily B member 4	-1.746	-3.35427	0.005337
207819_s_at	g9961253	ABCB4	ATP binding cassette subfamily B member 4	-2.181	-4.53468	0.000235
208161_s_at	g9955971	ABCC3	ATP binding cassette subfamily C member 3	-0.973	-1.96292	0.037271
1558460_at	Hs2.348628.1	ABCC5	ATP binding cassette subfamily C member 5	1.218	2.32624	0.011827
203982_s_at	g4826957	ABCD4	ATP binding cassette subfamily D member 4	-0.697	-1.62113	0.012371
203981_s_at	Hs.94395.4	ABCD4	ATP binding cassette subfamily D member 4	-1.195	-2.28945	0.007894
209247_s_at	g12804500	ABCF2	ATP binding cassette subfamily F member 2	1.161	2.23612	0.000997
207622_s_at	g10947136	ABCF2	ATP binding cassette subfamily F member 2	1.042	2.05908	0.002172
211113_s_at	g1314276	ABCG1	ATP binding cassette subfamily G member 1	-1.102	-2.14652	0.007226
204567_s_at	g8051574	ABCG1	ATP binding cassette subfamily G member 1	-1.38	-2.60268	0.002563
232081_at	Hs.6655.0	ABCG1	ATP binding cassette subfamily G member 1	-2.729	-6.62996	0.001205
230913_at	Hs.59525.0	ABCG1	ATP binding cassette subfamily G member 1	-3.329	-10.0491	0.001884
224742_at	Hs.236522.0	ABHD12	abhydrolase domain containing 12	0.733	1.66209	0.015601
237974_at	Hs.196582.0	ABHD12B	abhydrolase domain containing 12B	-2.027	-4.07556	0.002517
235348_at	Hs.97852.0	ABHD13	abhydrolase domain containing 13	0.842	1.79253	0.005884
236240_at	Hs.164302.0	ABHD18	abhydrolase domain containing 18	-0.934	-1.91057	0.03494
241968_at	Hs.143995.0	ABHD18	abhydrolase domain containing 18	-1.826	-3.54553	0.011331
63825_at	4868127_RC	ABHD2	abhydrolase domain containing 2	0.792	1.73147	0.035508
242023_at	Hs.130232.0	ABHD4	abhydrolase domain containing 4	-0.872	-1.8302	0.01217
212895_s_at	Hs.118021.2	ABR	active BCR-related	-0.999	-1.99861	0.004132
218405_at	g7019318	ABT1	activator of basal transcription 1	0.856	1.81001	0.008442
229164_s_at	Hs.107812.2	ABTB1	ankyrin repeat and BTB (POZ) domain containing 1	-0.944	-1.92385	0.013608
214358_at	Hs.7232.1	ACACA	acetyl-CoA carboxylase alpha	1.342	2.53503	0.002604
221928_at	Hs.234898.0	ACACB	acetyl-CoA carboxylase beta	-0.818	-1.76296	0.007486
49452_at	4867939_RC	ACACB	acetyl-CoA carboxylase beta	-1.039	-2.0548	0.007076
43427_at	4811882_RC	ACACB	acetyl-CoA carboxylase beta	-1.085	-2.12138	0.005407
225542_at	Hs.21446.0	ACAP3	ArfGAP with coiled-coil, ankyrin repeat and PH domains 3	0.709	1.63467	0.020954
212977_at	Hs.23016.0	ACKR3	atypical chemokine receptor 3	-1.599	-3.02933	0.025903
237622_at	Hs.104091.0	ACO1	aconitase 1, soluble	-1.234	-2.35218	0.025143
200793_s_at	g4501866	ACO2	aconitase 2, mitochondrial	1.665	3.17114	0.000815
229534_at	Hs.49433.0	ACOT4	acyl-CoA thioesterase 4	-0.918	-1.88949	0.029115
208002_s_at	g6857796	ACOT7	acyl-CoA thioesterase 7	1.144	2.20993	0.018329
236514_at	Hs.6511.0	ACOT8	acyl-CoA thioesterase 8	1.415	2.6666	0.022461
205364_at	g4501868	ACOX2	acyl-CoA oxidase 2, branched chain	1.216	2.32302	0.025903
218844_at	g13376740	ACSF2	acyl-CoA synthetase family member 2	-0.803	-1.74473	0.014354
214957_at	Hs.2149.0	ACTL8	actin-like 8	0.78	1.71713	0.011429
200601_at	g3157975	ACTN4	actinin, alpha 4	0.772	1.70764	0.031761
223665_at	g13383264	ACTRT3	actin-related protein T3	-1.082	-2.11697	0.02372
236126_at	Hs.42302.0	ACVR2B	activin A receptor type IIB	-0.715	-1.64148	0.007507
1559548_at	Hs2.174273.1	ACVR2B	activin A receptor type IIB	-0.865	-1.82134	0.005999
207665_at	g11497039	ADAM21	ADAM metallopeptidase domain 21	-0.714	-1.64035	0.024102
1552579_a_at	Hs2.178748.1	ADAM21	ADAM metallopeptidase domain 21	-1.517	-2.86195	0.008636
222162_s_at	Hs.8230.1	ADAMTS1	ADAM metallopeptidase with thrombospondin type 1 motif 1	1.7	3.24901	0.031153
222486_s_at	g5725505	ADAMTS1	ADAM metallopeptidase with thrombospondin type 1 motif 1	1.601	3.03354	0.034762
238125_at	Hs.205299.0	ADAMTS16	ADAM metallopeptidase with thrombospondin type 1 motif 16	0.853	1.80625	0.027484
214535_s_at	Hs.120330.1	ADAMTS2	ADAM metallopeptidase with thrombospondin type 1 motif 2	1.882	3.68586	0.001065
235368_at	Hs.81796.0	ADAMTS5	ADAM metallopeptidase with thrombospondin type 1 motif 5	0.786	1.72429	0.041731
220866_at	g7656868	ADAMTS6	ADAM metallopeptidase with thrombospondin type 1 motif 6	1.612	3.05675	0.043963
235649_at	Hs.126758.0	ADAMTS8	ADAM metallopeptidase with thrombospondin type 1 motif 8	0.688	1.61105	0.048844
226814_at	Hs.16450.0	ADAMTS9	ADAM metallopeptidase with thrombospondin type 1 motif 9	-1.921	-3.78685	0.003233
213974_at	Hs.18705.0	ADAMTSL3	ADAMTS like 3	-3.116	-8.66981	0.003064
201786_s_at	g7669471	ADAR	adenosine deaminase, RNA-specific	1.117	2.16895	0.006606
209321_s_at	g4104225	ADCY3	adenylate cyclase 3	1.06	2.08493	0.001382
226690_at	Hs.4748.1	ADCYAP1R1	adenylate cyclase activating polypeptide 1 (pituitary) receptor type I	2.673	6.37754	0.001493
207151_at	g4501922	ADCYAP1R1	adenylate cyclase activating polypeptide 1 (pituitary) receptor type I	1.872	3.6604	0.009484
230988_at	Hs.15155.0	ADD2	adducin 2 (beta)	0.753	1.68529	0.046594
201752_s_at	Hs.324470.1	ADD3	adducin 3 (gamma)	-0.965	-1.95206	0.031965
221814_at	Hs.17270.0	ADGRA2	adhesion G protein-coupled receptor A2	1.308	2.47598	0.000608
65718_at	4885918_RC	ADGRA2	adhesion G protein-coupled receptor A2	1.187	2.27679	0.000608
205638_at	g4502358	ADGRB3	adhesion G protein-coupled receptor B3	-2.134	-4.38933	0.011109
1553025_at	Hs2Affx.1.4	ADGRG6	adhesion G protein-coupled receptor G6	-1.265	-2.40327	0.003477
213094_at	Hs.44197.0	ADGRG6	adhesion G protein-coupled receptor G6	-1.296	-2.45547	0.02656
209867_s_at	g11037015	ADGRL3	adhesion G protein-coupled receptor L3	1.153	2.22376	0.023723
217748_at	g7705760	ADIPOR1	adiponectin receptor 1	0.71	1.6358	0.01752
205891_at	g4501950	ADORA2B	adenosine A2b receptor	1.304	2.46913	0.029357
228042_at	Hs.100926.0	ADPRH	ADP-ribosylarginine hydrolase	-0.891	-1.85446	0.022461
238505_at	Hs.300425.0	ADPRH	ADP-ribosylarginine hydrolase	-0.997	-1.99585	0.010615
209869_at	g13447750	ADRA2A	adrenoceptor alpha 2A	0.684	1.60659	0.03877
206128_at	Hs.123022.0	ADRA2C	adrenoceptor alpha 2C	0.855	1.80876	0.008616
229277_at	Hs.37744.0	ADRB1	adrenoceptor beta 1	-0.695	-1.61888	0.01995
229309_at	Hs.37744.0	ADRB1	adrenoceptor beta 1	-0.97	-1.95884	0.036176
210250_x_at	g3211983	ADSL	adenylosuccinate lyase	0.677	1.59881	0.012647
227310_at	Hs.90011.1	ADSS	adenylosuccinate synthase	0.828	1.77522	0.048343
219361_s_at	g12232442	AEN	apoptosis enhancing nuclease	0.906	1.87384	0.011223
215451_s_at	Hs.114765.2	AFF1	AF4/FMR2 family, member 1	-0.867	-1.82387	0.021534
201924_at	g5174572	AFF1	AF4/FMR2 family, member 1	-0.975	-1.96564	0.00939
216364_s_at	Hs.54472.2	AFF2	AF4/FMR2 family, member 2	1.224	2.33593	0.009004
210957_s_at	g1313885	AFF2	AF4/FMR2 family, member 2	0.867	1.82387	0.044029
202486_at	g5802969	AFG3L2	AFG3-like AAA ATPase 2	1.308	2.47598	0.000746
1557820_at	Hs2.416822.1	AFG3L2	AFG3-like AAA ATPase 2	0.961	1.94666	0.006689
232919_at	Hs.287495.0	AFG3L2	AFG3-like AAA ATPase 2	0.652	1.57135	0.027468
1554618_at	Hs2.278502.2	AGFG2	ArfGAP with FG repeats 2	1.813	3.51372	0.019832
222126_at	Hs.251678.0	AGFG2	ArfGAP with FG repeats 2	1.069	2.09798	0.019003
241091_at	Hs.202057.0	AGO3	argonaute RISC catalytic component 3	-1.201	-2.29899	0.032171
235782_at	Hs.127341.0	AGO3	argonaute RISC catalytic component 3	-1.591	-3.01258	0.021405
227930_at	Hs.21887.0	AGO4	argonaute RISC catalytic component 4	-1.538	-2.90392	0.037236
228667_at	Hs.127958.0	AGPAT4	1-acylglycerol-3-phosphate O-acyltransferase 4	-2.188	-4.55673	9.7e-05
218096_at	g8922941	AGPAT5	1-acylglycerol-3-phosphate O-acyltransferase 5	1.445	2.72263	0.0137
232007_at	Hs.281895.0	AGPAT5	1-acylglycerol-3-phosphate O-acyltransferase 5	0.919	1.8908	0.025688
209173_at	g6652811	AGR2	anterior gradient 2, protein disulphide isomerase family member	-2.632	-6.19885	0.00135
204500_s_at	g7662451	AGTPBP1	ATP/GTP binding protein 1	-0.953	-1.93589	0.045012
238135_at	Hs.121906.0	AGTRAP	angiotensin II receptor-associated protein	-1.438	-2.70945	0.028912
214766_s_at	Hs.33363.1	AHCTF1	AT hook containing transcription factor 1	1.155	2.22684	0.002251
226115_at	Hs.33363.0	AHCTF1	AT hook containing transcription factor 1	1.039	2.0548	0.000975
207464_at	g7662535	AHCYL1	adenosylhomocysteinase like 1	-1.201	-2.29899	0.013559
200849_s_at	Hs.4113.0	AHCYL1	adenosylhomocysteinase like 1	-1.376	-2.59548	0.001659
200850_s_at	g5729723	AHCYL1	adenosylhomocysteinase like 1	-1.59	-3.01049	0.006875
200848_at	Hs.4113.0	AHCYL1	adenosylhomocysteinase like 1	-1.602	-3.03564	0.003117
229354_at	Hs.24087.0	AHRR	aryl-hydrocarbon receptor repressor	-1.073	-2.1038	0.006819
205512_s_at	g4757731	AIFM1	apoptosis-inducing factor, mitochondrion-associated, 1	0.651	1.57026	0.04385
1556210_at	Hs2.48645.1	AIG1	androgen-induced 1	-2.241	-4.72725	0.006195
1556212_x_at	Hs2.48645.1	AIG1	androgen-induced 1	-2.349	-5.09471	0.006
1556211_a_at	Hs2.48645.1	AIG1	androgen-induced 1	-2.584	-5.996	0.002154
212543_at	Hs.161002.0	AIM1	absent in melanoma 1	-1.011	-2.01531	0.014356
202542_s_at	g4758265	AIMP1	aminoacyl tRNA synthetase complex-interacting multifunctional protein 1	0.665	1.58557	0.030899
212174_at	Hs.171811.2	AK2	adenylate kinase 2	0.87	1.82766	0.023573
224655_at	Hs.43436.1	AK3	adenylate kinase 3	-1.046	-2.0648	0.045233
204347_at	Hs.274691.0	AK4	adenylate kinase 4	-0.985	-1.97931	0.00573
230630_at	Hs.292805.0	AK4	adenylate kinase 4	-1.01	-2.01391	0.005596
225342_at	Hs.10862.0	AK4	adenylate kinase 4	-1.259	-2.3933	0.007256
230846_at	Hs.22902.0	AKAP5	A kinase (PRKA) anchor protein 5	-1.438	-2.70945	0.020328
204151_x_at	g5453542	AKR1C1	aldo-keto reductase family 1, member C1	2.377	5.19455	0.001767
216594_x_at	Hs.306098.1	AKR1C1	aldo-keto reductase family 1, member C1	1.829	3.55291	0.000608
209699_x_at	g531159	AKR1C2	aldo-keto reductase family 1, member C2	2.45	5.46416	0.00135
211653_x_at	g187444	AKR1C2	aldo-keto reductase family 1, member C2	1.983	3.95314	3.3e-05
209160_at	g6624210	AKR1C3	aldo-keto reductase family 1, member C3	2.644	6.25062	8.7e-05
202139_at	g4502020	AKR7A2	aldo-keto reductase family 7, member A2	0.674	1.59549	0.023291
218373_at	g11968026	AKTIP	AKT interacting protein	-0.85	-1.8025	0.045757
1569362_at	Hs2.435844.1	ALCAM	activated leukocyte cell adhesion molecule	1.726	3.30809	0.002172
207015_s_at	g10835044	ALDH1A2	aldehyde dehydrogenase 1 family, member A2	-1.121	-2.17498	0.004667
207016_s_at	g3970845	ALDH1A2	aldehyde dehydrogenase 1 family, member A2	-2.66	-6.32033	0.000586
203180_at	g4502040	ALDH1A3	aldehyde dehydrogenase 1 family, member A3	1.685	3.2154	0.001414
1558649_at	Hs2.293230.1	ALDH1A3	aldehyde dehydrogenase 1 family, member A3	-0.792	-1.73147	0.044402
204289_at	Hs.293970.0	ALDH6A1	aldehyde dehydrogenase 6 family, member A1	-1.02	-2.02792	0.012587
208950_s_at	g12803386	ALDH7A1	aldehyde dehydrogenase 7 family, member A1	0.802	1.74352	0.017599
207396_s_at	g5031952	ALG3	ALG3, alpha-1,3- mannosyltransferase	0.924	1.89737	0.033958
1556911_at	Hs2.340140.1	ALMS1-IT1	ALMS1 intronic transcript 1	1.91	3.75809	0.002611
227438_at	Hs.96840.0	ALPK1	alpha kinase 1	-1.441	-2.71509	0.02276
232184_at	Hs.149391.0	ALS2	ALS2, alsin Rho guanine nucleotide exchange factor	1.508	2.84415	0.001272
226291_at	Hs.27669.0	ALS2	ALS2, alsin Rho guanine nucleotide exchange factor	-0.68	-1.60214	0.04184
226320_at	Hs.241520.0	ALYREF	Aly/REF export factor	0.768	1.70291	0.042423
226319_s_at	Hs.241520.0	ALYREF	Aly/REF export factor	0.701	1.62563	0.030987
52731_at	4849365_RC	AMBRA1	autophagy/beclin-1 regulator 1	0.644	1.56266	0.022329
236760_at	Hs.17643.0	AMMECR1	Alport syndrome, mental retardation, midface hypoplasia and elliptocytosis chromosomal region gene 1	1.254	2.38502	0.049212
1553219_a_at	Hs2.326142.1	AMMECR1	Alport syndrome, mental retardation, midface hypoplasia and elliptocytosis chromosomal region gene 1	0.806	1.74836	0.008729
1563792_at	Hs2.376552.1	AMN	amnion associated transmembrane protein	-0.688	-1.61105	0.046594
226258_at	Hs.12296.0	AMN1	antagonist of mitotic exit network 1 homolog	-1.112	-2.16145	0.035504
212360_at	Hs.82927.0	AMPD2	adenosine monophosphate deaminase 2	-1.035	-2.04911	0.016536
209491_s_at	Hs.83918.1	AMPD3	adenosine monophosphate deaminase 3	-1.135	-2.19619	0.039411
207992_s_at	g4502078	AMPD3	adenosine monophosphate deaminase 3	-1.553	-2.93427	0.002488
204294_at	g4502082	AMT	aminomethyltransferase	-1.126	-2.18253	0.042615
205141_at	g4557312	ANG	angiogenin, ribonuclease, RNase A family, 5	-1.555	-2.93834	0.003669
205609_at	g4502086	ANGPT1	angiopoietin 1	1.483	2.79529	0.024607
205608_s_at	g1907326	ANGPT1	angiopoietin 1	1.161	2.23612	0.023113
237261_at	Hs.71832.0	ANGPT2	angiopoietin 2	2.296	4.91094	0.045896
205572_at	g4557314	ANGPT2	angiopoietin 2	2.035	4.09823	0.004836
236034_at	Hs.68301.0	ANGPT2	angiopoietin 2	1.955	3.87716	0.039456
211148_s_at	g8570646	ANGPT2	angiopoietin 2	1.866	3.64521	0.010221
208353_x_at	g10947047	ANK1	ankyrin 1, erythrocytic	0.805	1.74715	0.023404
205391_x_at	g178645	ANK1	ankyrin 1, erythrocytic	0.789	1.72788	0.037626
207087_x_at	g10947043	ANK1	ankyrin 1, erythrocytic	0.75	1.68179	0.033971
208352_x_at	g10947045	ANK1	ankyrin 1, erythrocytic	0.746	1.67714	0.030978
220144_s_at	g11545808	ANKEF1	ankyrin repeat and EF-hand domain containing 1	-1.225	-2.33755	0.036524
220076_at	g10947057	ANKH	ANKH inorganic pyrophosphate transport regulator	-1.018	-2.02511	0.047184
218093_s_at	g8923103	ANKRD10	ankyrin repeat domain 10	-1.054	-2.07628	0.01028
229058_at	Hs.98710.0	ANKRD16	ankyrin repeat domain 16	0.941	1.91986	0.02814
242116_x_at	Hs.240722.0	ANKRD17	ankyrin repeat domain 17	1.544	2.91602	0.000334
1559170_at	Hs2.364456.1	ANKRD20A5P	ankyrin repeat domain 20 family, member A5, pseudogene	0.815	1.7593	0.014877
239196_at	Hs.217484.0	ANKRD22	ankyrin repeat domain 22	-2.246	-4.74366	0.031583
238332_at	Hs.135560.0	ANKRD29	ankyrin repeat domain 29	-1.845	-3.59253	0.005534
229308_at	Hs.42500.1	ANKRD29	ankyrin repeat domain 29	-2.742	-6.68997	0.007748
220940_at	g13449272	ANKRD36B	ankyrin repeat domain 36B	-1.499	-2.82647	0.010356
1555898_at	Hs2.406128.1	ANKRD36C	ankyrin repeat domain 36C	-2.345	-5.0806	0.006689
226641_at	Hs.11571.0	ANKRD44	ankyrin repeat domain 44	-1.515	-2.85799	0.008549
228471_at	Hs.145053.0	ANKRD44	ankyrin repeat domain 44	-1.608	-3.04829	0.01648
231847_at	Hs.135259.0	ANKRD54	ankyrin repeat domain 54	0.868	1.82513	0.011295
204671_s_at	Hs.30991.0	ANKRD6	ankyrin repeat domain 6	-1.627	-3.0887	0.002175
218804_at	g8922319	ANO1	anoctamin 1, calcium activated chloride channel	1.65	3.13834	0.017325
1555269_a_at	Hs2.26176.2	ANO1	anoctamin 1, calcium activated chloride channel	1.073	2.1038	0.009016
229313_at	Hs.42721.0	ANO5	anoctamin 5	1.482	2.79336	0.012165
202888_s_at	g4502094	ANPEP	alanyl (membrane) aminopeptidase	1.454	2.73967	0.004525
201012_at	g4502100	ANXA1	annexin A1	0.83	1.77769	0.047537
1568126_at	Hs2.435459.1	ANXA2	annexin A2	1.018	2.02511	0.047935
200982_s_at	g4809274	ANXA6	annexin A6	1.23	2.34567	0.004458
211712_s_at	g13543331	ANXA9	annexin A9	-0.65	-1.56917	0.027248
205083_at	g6598319	AOX1	aldehyde oxidase 1	1.137	2.19923	0.015291
219023_at	g8923996	AP1AR	adaptor-related protein complex 1 associated regulatory protein	-0.733	-1.66209	0.015056
201613_s_at	g12653494	AP1G2	adaptor-related protein complex 1, gamma 2 subunit	-1.952	-3.86911	0.002088
231714_s_at	Hs.28298.0	AP4B1	adaptor-related protein complex 4, beta 1 subunit	-0.988	-1.98343	0.020928
236221_at	Hs.130858.0	AP4B1	adaptor-related protein complex 4, beta 1 subunit	-1.338	-2.52801	0.025067
210278_s_at	g5442367	AP4S1	adaptor-related protein complex 4, sigma 1 subunit	-0.973	-1.96292	0.007001
209871_s_at	g3953612	APBA2	amyloid beta (A4) precursor protein-binding, family A, member 2	-1.078	-2.11111	0.00593
230925_at	Hs.122910.0	APBB1IP	amyloid beta (A4) precursor protein-binding, family B, member 1 interacting protein	1.897	3.72438	0.000269
219994_at	g9506856	APBB1IP	amyloid beta (A4) precursor protein-binding, family B, member 1 interacting protein	1.18	2.26577	0.009477
235548_at	Hs.119286.0	APCDD1L	adenomatosis polyposis coli down-regulated 1-like	1.671	3.18435	0.000997
204408_at	g7656891	APEX2	APEX nuclease (apurinic/apyrimidinic endonuclease) 2	1.023	2.03214	0.009011
226358_at	Hs.29894.0	APH1B	APH1B gamma secretase subunit	-0.926	-1.9	0.003521
214960_at	Hs.227913.1	API5	apoptosis inhibitor 5	1.444	2.72074	0.008795
213454_at	Hs.44205.1	APITD1	apoptosis-inducing, TAF9-like domain 1	0.77	1.70527	0.030182
225427_s_at	Hs.6880.3	APOA1BP	apolipoprotein A-I binding protein	0.968	1.95613	0.017377
206632_s_at	g4758159	APOBEC3B	apolipoprotein B mRNA editing enzyme, catalytic polypeptide-like 3B	1.647	3.13182	0.011638
204416_x_at	g5174774	APOC1	apolipoprotein C-I	0.694	1.61776	0.010908
221013_s_at	g13562089	APOL2	apolipoprotein L, 2	-0.777	-1.71356	0.006995
241869_at	Hs.233304.0	APOL6	apolipoprotein L, 6	-0.995	-1.99308	0.011011
219716_at	g13449280	APOL6	apolipoprotein L, 6	-1.129	-2.18707	0.003113
1557236_at	Hs2.349076.1	APOL6	apolipoprotein L, 6	-1.382	-2.60629	0.001751
1557116_at	Hs2.363456.1	APOL6	apolipoprotein L, 6	-1.889	-3.70378	0.001054
202630_at	Hs.84084.0	APPBP2	amyloid beta precursor protein (cytoplasmic tail) binding protein 2	-1.178	-2.26263	0.002136
227431_at	Hs.65828.0	APTR	Alu-mediated CDKN1A/p21 transcriptional regulator (non-protein coding)	0.877	1.83655	0.002509
211110_s_at	g5639998	AR	androgen receptor	0.909	1.87774	0.018665
226197_at	Hs.76704.0	AR	androgen receptor	0.854	1.80751	0.035783
226192_at	Hs.76704.0	AR	androgen receptor	0.647	1.56591	0.018466
211621_at	g178655	AR	androgen receptor	0.638	1.55617	0.049042
[truncated: 4,565 more rows]
