# Supplementary material for: Mitochondrial acetyl-CoA reversibly regulates locus-specific histone acetylation and gene expression
Source: Life Sci Alliance. 2019 Feb 8;2(1):e201800228. doi: 10.26508/lsa.201800228 (PMC6369536; doi:10.26508/lsa.201800228)
Supplement: Supplementary file 4 [file LSA-2018-00228_TableS4.xlsx]

## Sheet: DEG Selection Criteria
CRITERIA:
1) FDR p<0.05 AND |FC|>1.55 for rho(0CTL)/rho(+)
2) FDR p<0.05 OR |FC|>1.55 for rho(0αKG)/rho(0CTL)
Recovered: ρ(0αKG)/ρ(0CTL) opposes ρ(0CTL)/ρ(+) difference
Narrow: FDR p<0.05, |FC|>1.55 for ρ(0αKG)/ρ(0CTL)
Narrow (marginal): FDR p<0.05, |FC|<1.55 for ρ(0αKG)/ρ(0CTL)
Dampen: FDR p>0.05, |FC|>1.55 for ρ(0αKG)/ρ(0CTL)
Enhanced: ρ(0αKG)/ρ(0CTL) supports ρ(0CTL)/ρ(+) difference
Boost: FDR p>0.05, |FC|>1.55 for ρ(0αKG)/ρ(0CTL)
Widen (marginal): FDR p<0.05, |FC|<1.55 for ρ(0αKG)/ρ(0CTL)
Widen: FDR p<0.05, |FC|>1.55 for ρ(0αKG)/ρ(0CTL)
Null: Passes criterion 1 [i.e. BOTH FDR p<0.05 AND |FC|>1.55 for ρ(0CTL)/ρ(+)] but fails criterion 2 [i.e. NEITHER FDR p<0.05 NOR |FC|>1.55 for ρ(0αKG)/ρ(0CTL)]
Blank: Fails both criterion 1 [i.e. ONLY FDR p<0.05 OR |FC|>1.55 for ρ(0CTL)/ρ(+), NEVER BOTH] and criterion 2 [i.e. NEITHER FDR p<0.05 NOR |FC|>1.55 for ρ(0αKG)/ρ(0CTL)]

## Sheet: Summary aKG Effect DEG Lists
143B (RMA process): 596 DEGs with "aKG Diff Effect"	143B (RMA process): 190 DEGs included exclusively in "Up rho(0)/rho(+), Rescued"	143B (RMA process): 219 DEGs included exclusively in "Down rho(0)/rho(+), Rescued"	143B (RMA process): 86 DEGs included exclusively in "Up rho(0)/rho(+), Enhanced"	143B (RMA process): 101 DEGs included exclusively in "Down rho(0)/rho(+), Enhanced"	143B (RMA process): 2706 DEGs included exclusively in "aKG Null Effect"	143B (RMA process): 1341 DEGs included exclusively in "Up rho(0)/rho(+), aKG Null Effect"	143B (RMA process): 1365 DEGs included exclusively in "Down rho(0)/rho(+), aKG Null Effect"	143B (RMA process): 441 DEGs included exclusively in "aKG Diff Effect"	143B (RMA process): 155 common DEGs in "aKG Diff Effect" and "aKG Null Effect"	143B (RMA process): 11 common DEGs in "Up" and "Down" of "rho(0)/rho(+), aKG Null Effect"
ABCA1	ACOX2	ABCC3	ABCA1	ACTRT3	A2M	AAK1	A2M	ABCA1	ALS2	ALDH1A3
ABCC3	ACTL8	ABCG1	ADAMTS1	ARRDC4	AAK1	AATF	AASDH	ABCC3	ANGPT1	DOCK1
ABCG1	AGFG2	ACKR3	ADAMTS5	ATF7IP2	AASDH	ABCB10	ABAT	ABCG1	ANKRD29	GLS
ACKR3	AKR7A2	ADGRB3	ADAMTS6	BMP4	AATF	ABCC5	ABCA5	ACKR3	BCL6	HDAC8
ACOX2	ALS2	ANKRD10	ALCAM	C21orf58	ABAT	ABCF2	ABCB4	ACOX2	BEND6	IDS
ACTL8	ANGPT1	ANKRD29	APCDD1L	C4orf3	ABCA5	ABHD12	ABCD4	ACTL8	BIRC5	NR2C1
ACTRT3	ANKRD20A5P	ANKRD36B	ARHGAP32	CCL28	ABCB10	ABHD13	ABHD12B	ACTRT3	BMP2	PSMG4
ADAMTS1	AOX1	ANKRD36C	ATP10A	CD93	ABCB4	ABHD2	ABHD18	ADAMTS1	BRCA1	RPL31
ADAMTS5	APTR	ARHGAP29	BLID	COQ10B	ABCC5	ABT1	ABHD4	ADAMTS5	BRWD1	SLC13A3
ADAMTS6	ARHGAP11A	ARHGAP31	BMP2	COX18	ABCD4	ACACA	ABR	ADAMTS6	C4orf3	SLC4A8
ADGRB3	ARHGEF26	ATP7A	CHST11	CYP2U1	ABCF2	ACAP3	ABTB1	ADGRB3	CCL28	VSIG10
AGFG2	ASF1B	BAZ2B	CLK4	DBT	ABHD12	ACO2	ACACB	AGFG2	CD58
AKR7A2	ATOH8	BBIP1	CLN8	DLG3	ABHD12B	ACOT7	ACO1	AKR7A2	CEBPD
ALCAM	BAG2	BCL6	COL22A1	ELOVL6	ABHD13	ACOT8	ACOT4	ALCAM	CENPI
ALS2	BCOR	BEND6	COL5A3	EPHX4	ABHD18	ACTN4	ACSF2	ANKRD10	CHD2
ANGPT1	BIRC5	BEND7	COL7A1	ERAP2	ABHD2	ADAMTS16	ACVR2B	ANKRD20A5P	CLEC2D
ANKRD10	BORA	BHLHE40	DCAF13	EVI2A	ABHD4	ADAMTS2	ADAM21	ANKRD36B	CLMN
ANKRD20A5P	BRCA1	BPGM	DCC	FAM198A	ABR	ADAMTS8	ADAMTS9	ANKRD36C	CNIH4
ANKRD29	C11orf45	BRWD1	DLC1	FOXA2	ABT1	ADAR	ADAMTSL3	AOX1	COL22A1
ANKRD36B	C19orf24	C11orf63	DLG1	GATM	ABTB1	ADCY3	ADD3	APCDD1L	COL4A4
ANKRD36C	C19orf70	C15orf57	DSP	GBP3	ACACA	ADCYAP1R1	ADGRG6	APTR	COL8A1
AOX1	C1orf43	C1orf52	EFNB2	GOLPH3L	ACACB	ADD2	ADPRH	ARHGAP11A	CREB5
APCDD1L	C20orf196	C1QTNF3	EPG5	GSAP	ACAP3	ADGRA2	ADRB1	ARHGAP29	CRYGS
APTR	C20orf197	C8orf4	FAM174B	H2AFJ	ACO1	ADGRL3	AFF1	ARHGAP31	CSMD2
ARHGAP11A	CBX2	CACNA2D3	FAP	HIST1H2AG	ACO2	ADIPOR1	AGO3	ARHGAP32	CXCL8
ARHGAP29	CCDC15	CAPRIN2	FN1	HIST1H2BC	ACOT4	ADORA2B	AGO4	ARHGEF26	CYB5R3
ARHGAP31	CCND3	CBFA2T2	FOSL2	HIST1H2BD	ACOT7	ADRA2A	AGPAT4	ARRDC4	DBT
ARHGAP32	CCSER2	CCDC144B	GABRE	HOXB5	ACOT8	ADRA2C	AGR2	ASF1B	DCAF13
ARHGEF26	CDCA2	CCDC144CP	GART	HOXB6	ACSF2	ADSL	AGTPBP1	ATF7IP2	DCC
ARRDC4	CDCA3	CCNL2	GREM1	HOXB7	ACTN4	ADSS	AGTRAP	ATOH8	DIP2A
ASF1B	CDCA5	CD58	HAS2	HSPA2	ACVR2B	AEN	AHCYL1	ATP10A	DLG3
ATF7IP2	CDCA8	CDKN1A	HMGA2	IDH1	ADAM21	AFF2	AHRR	ATP7A	DNASE1
ATOH8	CDCP1	CEBPD	JARID2	IFT81	ADAMTS16	AFG3L2	AIG1	BAG2	EFNB2
ATP10A	CENPI	CHD2	KBTBD11	IQCG	ADAMTS2	AGPAT5	AIM1	BAZ2B	ENPP1
ATP7A	CENPW	CLCN6	KIF1A	LNX1	ADAMTS8	AHCTF1	AK3	BBIP1	EPG5
BAG2	CHAC2	CLEC2D	LAMA4	LOC101927027	ADAMTS9	AIFM1	AK4	BCOR	ERAP2
BAZ2B	COX5A	CLMN	LBH	LOC101930085	ADAMTSL3	AIMP1	AKAP5	BEND7	ESCO2
BBIP1	CRTAP	CNIH4	LOC102723694	LOC105370687	ADAR	AK2	AKTIP	BHLHE40	FAH
BCL6	CYB5R3	COL27A1	LOC102724689	LOC105376896	ADCY3	AKR1C1	ALDH1A2	BLID	FMO5
BCOR	DGKE	COL4A4	LOC105370977	LOC283861	ADCYAP1R1	AKR1C2	ALDH6A1	BMP4	FN1
BEND6	DHTKD1	COL8A1	LOC79160	LOC285628	ADD2	AKR1C3	ALPK1	BORA	FOXA2
BEND7	DLD	CREB5	LRRC15	LOC646778	ADD3	ALDH7A1	AMN	BPGM	GART
BHLHE40	DLX1	CRYGS	MBOAT2	LRIF1	ADGRA2	ALG3	AMN1	C11orf45	GATM
BIRC5	DPYD	CSGALNACT2	MICAL2	MAGEL2	ADGRG6	ALMS1-IT1	AMPD2	C11orf63	GDPD1
BLID	DTL	CSMD2	MICALCL	MAML3	ADGRL3	ALYREF	AMPD3	C15orf57	GGCX
BMP2	EBAG9	CTC1	MICALL1	MANSC1	ADIPOR1	AMBRA1	AMT	C19orf24	GPATCH2L
BMP4	ELOF1	CXCL8	MKL1	MBOAT1	ADORA2B	AMMECR1	ANG	C19orf70	GPR107
BORA	ESCO2	CYP27C1	NEDD9	MYEF2	ADPRH	ANGPT2	ANKEF1	C1orf43	GREM1
BPGM	ESX1	DAAM1	NFATC2	NMI	ADRA2A	ANK1	ANKH	C1orf52	HMGA2
BRCA1	EXO1	DIP2A	NIPAL4	NOVA1	ADRA2C	ANKRD16	ANKRD22	C1QTNF3	HNRNPU
BRWD1	FAH	DMTF1	NOX4	NRROS	ADRB1	ANKRD17	ANKRD44	C20orf196	HOXB5
C11orf45	FAM155B	DNAH1	PALM2	OBFC1	ADSL	ANKRD54	ANKRD6	C20orf197	HSPH1
C11orf63	FAM43B	DNASE1	PAPPA	PARP8	ADSS	ANO1	ANXA9	C21orf58	ICAM1
C15orf57	FBXO5	DOCK3	PARVA	PEX11A	AEN	ANO5	AP1AR	C8orf4	ICMT
C19orf24	FCRLB	DST	PER2	PLPP6	AFF1	ANPEP	AP1G2	CACNA2D3	INSR
C19orf70	FENDRR	DUSP6	PLPP4	POLI	AFF2	ANXA1	AP4B1	CAPRIN2	IRAK2
C1orf43	FGF9	EFHB	PPP1R12B	PRTG	AFG3L2	ANXA2	AP4S1	CBFA2T2	KALRN
C1orf52	FOXF1	EID3	PRKDC	PSRC1	AGO3	ANXA6	APBA2	CBX2	KIF1A
C1QTNF3	GDF11	EIF1	PTHLH	RBM15	AGO4	APBB1IP	APH1B	CCDC144B	KIF2C
C20orf196	GGCX	EML6	PTPRF	RBM43	AGPAT4	APEX2	APOL2	CCDC144CP	KLHL29
C20orf197	GIMAP4	ENDOV	SEMA7A	RGCC	AGPAT5	API5	APOL6	CCDC15	KLHL9
C21orf58	GINS4	ENO2	SERPINE1	RHOC	AGR2	APITD1	APPBP2	CCND3	LAMA4
C4orf3	GLUL	ENPP1	SLCO5A1	RHOJ	AGTPBP1	APOA1BP	ARFGEF2	CCNL2	LINGO2
C8orf4	GMNN	ERN1	SLIT2	RNASEL	AGTRAP	APOBEC3B	ARFGEF3	CCSER2	LLPH
CACNA2D3	GPR107	ETV6	SMAD7	SAMD5	AHCTF1	APOC1	ARG2	CD93	LOC100505549
CAPRIN2	HIRIP3	FAM84B	SMIM13	SAV1	AHCYL1	AR	ARHGAP44	CDCA2	LOC101927027
CBFA2T2	HIST1H2BG	FANK1	SOWAHC	SC5D	AHRR	ARF1	ARHGAP5	CDCA3	LOC101929147
CBX2	HIST1H4B	FGD4	SPATS2L	SCAI	AIFM1	ARF3	ARHGAP6	CDCA5	LOC401320
CCDC144B	HNRNPF	FGFR1OP2	SPHK1	SH3GL3	AIG1	ARHGAP1	ARID4A	CDCA8	LOC645513
CCDC144CP	HNRNPU	FMO5	SRGAP1	SIX4	AIM1	ARHGAP4	ARIH1	CDCP1	MAP3K12
CCDC15	HOPX	FRAS1	STK17B	SLC16A4	AIMP1	ARHGEF7	ARL10	CDKN1A	MCAM
CCL28	HPDL	GATS	SUN3	SLC40A1	AK2	ARID1A	ARL3	CENPW	METTL13
CCND3	HSPB1	GDPD1	TBX3	SLFN11	AK3	ARIH2	ARRB1	CHAC2	MICAL2
CCNL2	HSPD1	GLIS3	TGFB2	SNN	AK4	ARL4C	ARSK	CHST11	MICALL1
CCSER2	HSPH1	GOLGA8A	TOR1AIP2	SORD	AKAP5	ARMC4	ARVCF	CLCN6	MKI67
CD58	IL24	GPATCH2L	UNC5B	SPATA7	AKR1C1	ARSB	ARX	CLK4	MKL1
CD93	IRX1	GRIP1	UNC5D	SREK1IP1	AKR1C2	ASAH1	AS3MT	CLN8	MLX
CDCA2	ISG20L2	GSDMB	VASN	STRIP2	AKR1C3	ASAP1	ASAH2B	COL27A1	MPDZ
CDCA3	ITPRIPL1	HERPUD1	VGLL3	STYX	AKTIP	ASCC3	ASB14	COL5A3	MRPL35
CDCA5	KBTBD6	HIVEP2	VSTM4	SYNJ2BP	ALDH1A2	ASH1L	ASTN1	COL7A1	MRPL4
CDCA8	KBTBD7	HNRNPD	WNT7A	TIGD7	ALDH6A1	ASH2L	ATG14	COQ10B	MRPL41
CDCP1	KIF18A	HPSE	XKRX	TM4SF18	ALDH7A1	ASPM	ATG16L2	COX18	MSRA
CDKN1A	KIF20A	ICAM1	XYLT1	TMEM107	ALG3	ASTN2	ATHL1	COX5A	MTRF1
CEBPD	KIF20B	ICMT	ZNF175	TOB1	ALMS1-IT1	ATAD2	ATL1	CRTAP	MYEF2
CENPI	KIF2C	IL1A	ZNF407	TRIM27	ALPK1	ATAD3A	ATM	CSGALNACT2	NAPA
CENPW	KITLG	IL1B	ZNF451	TRIM45	ALYREF	ATAD3B	ATP13A4	CTC1	NDUFA11
CHAC2	KLHL29	IL6ST		TRIM59	AMBRA1	ATAD5	ATP2A3	CYP27C1	NOVA1
CHD2	LCTL	INSIG2		TSPYL4	AMMECR1	ATG16L1	ATP5F1	CYP2U1	NRCAM
CHST11	LETM2	INSR		TTC30B	AMN	ATG7	ATP5S	DAAM1	NRP2
CLCN6	LINC00460	IRAK2		TTC39B	AMN1	ATOX1	ATP6V1D	DGKE	NSDHL
CLEC2D	LLPH	ITPR1		TXNIP	AMPD2	ATP1A3	ATP8A1	DHTKD1	OGT
CLK4	LOC100131262	ITSN2		ZBED8	AMPD3	ATP1B1	ATRX	DLC1	PA2G4
CLMN	LOC100505549	JAKMIP3		ZNF225	AMT	ATP5B	ATXN3	DLD	PAG1
CLN8	LOC100507600	JMJD1C		ZNF268	ANG	ATP5G1	AVIL	DLG1	PAPPA
CNIH4	LOC102723864	JUNB		ZNF302	ANGPT2	ATP5O	AZI2	DLX1	PARP8
COL22A1	LOC105370333	KALRN		ZNF304	ANK1	ATP6V0C	B3GNT5	DMTF1	PARVA
COL27A1	LOC219688	KCNB2		ZNF391	ANKEF1	ATP6V1C1	B3GNT7	DNAH1	PCDH9
COL4A4	LPAR3	KDM6B		ZNF426	ANKH	ATRIP	B4GALNT3	DOCK3	PCNX
COL5A3	LSM7	KIAA0355		ZNF548	ANKRD16	AUNIP	B4GALT1	DPYD	PDE4D
COL7A1	MAD2L1	KLF13		ZNF776	ANKRD17	AURKAIP1	B4GALT4	DSP	PHTF1
COL8A1	MAGEA3	KLF3		ZNF836	ANKRD22	AXL	B4GALT6	DST	PITPNC1
COQ10B	MAGEA6	KLHL24			ANKRD44	AZIN1	BAALC	DTL	PPP1R9A
COX18	MANEAL	KLHL9			ANKRD54	B3GALNT2	BACE2	DUSP6	PROSC
COX5A	MAP3K12	KRCC1			ANKRD6	B3GALT2	BACH2	EBAG9	PTPN21
CREB5	MCAM	KSR1			ANO1	B3GAT1	BAZ1A	EFHB	PTPRD
CRTAP	MDM1	LIF			ANO5	BAG4	BBC3	EID3	RBM14
CRYGS	MEPCE	LINC00342			ANPEP	BAIAP2	BBOF1	EIF1	RBM43
CSGALNACT2	METTL13	LINC00622			ANXA1	BCL11A	BBS1	ELOF1	RFX3
CSMD2	MINCR	LINC00969			ANXA2	BCS1L	BBS12	ELOVL6	RGS4
CTC1	MKI67	LINGO2			ANXA6	BGN	BBS2	EML6	RHOJ
CXCL8	MLX	LOC101929147			ANXA9	BICD1	BBS7	ENDOV	RIC1
CYB5R3	MMACHC	LOC101929787			AP1AR	BICD2	BBS9	ENO2	RNASEL
CYP27C1	MRPL35	LOC102606465			AP1G2	BIN3	BCAS2	EPHX4	RUFY3
CYP2U1	MRPL4	LOC105369199			AP4B1	BLM	BCL2A1	ERN1	RUNX1T1
DAAM1	MRPL41	LOC105379555			AP4S1	BNC1	BCL2L13	ESX1	SAMD5
DBT	MRPS34	LOC153682			APBA2	BNIP1	BCL3	ETV6	SARS
DCAF13	MSRA	LOC284561			APBB1IP	BOLA3	BDH2	EVI2A	SAT1
DCC	MTFR2	LOC401320			APEX2	BOP1	BDKRB2	EXO1	SAV1
DGKE	NAP1L3	LOC645513			APH1B	BORCS8	BEX2	FAM155B	SEMA7A
DHTKD1	NAPA	LOC646014			API5	BPTF	BFSP1	FAM174B	SIX4
DIP2A	NDUFA11	LOC727820			APITD1	BRCA2	BIRC3	FAM198A	SLC25A36
DLC1	NDUFB10	LUC7L			APOA1BP	BRF2	BLOC1S6	FAM43B	SLC25A37
DLD	NLRP3	LY96			APOBEC3B	BRIX1	BMF	FAM84B	SLC40A1
DLG1	NSDHL	MAGI3			APOC1	BRMS1	BMP8B	FANK1	SLC4A7
DLG3	ORC1	MARCH6			APOL2	BUB1	BRAF	FAP	SLIT2
DLX1	OXCT1	MCTP2			APOL6	BUD31	BRMS1L	FBXO5	SMIM13
DMTF1	PA2G4	MED28			APPBP2	BYSL	BRWD3	FCRLB	SOX4
DNAH1	PAG1	MEGF11			AR	C11orf24	BTBD18	FENDRR	SPATA7
DNASE1	PANK2	MIR210HG			ARF1	C12orf43	BTN2A2	FGD4	SREK1IP1
DOCK3	PCDH9	MMP10			ARF3	C16orf13	BTN3A3	FGF9	SRGAP1
DPYD	PDE12	MPDZ			ARFGEF2	C18orf21	C10orf10	FGFR1OP2	ST6GALNAC4
DSP	PDS5A	MTMR9LP			ARFGEF3	C19orf48	C10orf35	FOSL2	ST7L
DST	PFDN6	MTRF1			ARG2	C19orf52	C10orf88	FOXF1	STK17B
DTL	PHB	MYH3			ARHGAP1	C1orf109	C12orf56	FRAS1	STX2
DUSP6	PHLDA2	NCOA7			ARHGAP4	C1orf112	C12orf76	GABRE	STYX
EBAG9	PIK3R1	NOL4L			ARHGAP44	C1orf122	C14orf132	GATS	SYNJ2BP
EFHB	PLD6	NRCAM			ARHGAP5	C1orf216	C14orf159	GBP3	TBC1D30
EFNB2	PLPP3	NREP			ARHGAP6	C1orf27	C14orf28	GDF11	TCP11L2
EID3	PNPO	NRP2			ARHGEF7	C1orf54	C15orf40	GIMAP4	TGFB2
EIF1	POLA2	OGT			ARID1A	C1orf61	C15orf48	GINS4	TNFRSF9
ELOF1	POLD3	PAK3			ARID4A	C2orf44	C16orf46	GLIS3	TRIM45
ELOVL6	POLE3	PCDH7			ARIH1	C8orf33	C17orf100	GLUL	TSGA10
EML6	POLR2L	PCMTD2			ARIH2	C9orf114	C1orf101	GMNN	TTBK2
ENDOV	POLR3K	PCNX			ARL10	C9orf3	C1orf115	GOLGA8A	TXNIP
ENO2	POMZP3	PDE4D			ARL3	C9orf78	C1orf145	GOLPH3L	VPS13A
ENPP1	PPP2CA	PDGFD			ARL4C	CABLES1	C1orf21	GRIP1	XPNPEP3
EPG5	PROSC	PDZD2			ARMC4	CACNA1H	C1RL	GSAP	ZBTB1
EPHX4	PRR9	PELI2			ARRB1	CACYBP	C20orf194	GSDMB	ZBTB38
ERAP2	PSMC3	PGK1			ARSB	CAD	C21orf62	H2AFJ	ZNF117
ERN1	PTK7	PGLS			ARSK	CALB2	C2CD4A	HAS2	ZNF225
ESCO2	RBM14	PHTF1			ARVCF	CALD1	C2CD4B	HERPUD1	ZNF302
ESX1	RERE	PIK3CD			ARX	CAMKMT	C2orf81	HIRIP3	ZNF391
ETV6	RGS4	PITPNC1			AS3MT	CAND1	C4orf36	HIST1H2AG	ZNF426
EVI2A	RMND5B	PNRC1			ASAH1	CARD10	C4orf47	HIST1H2BC	ZNF548
EXO1	RNASEH2B	PPP1R9A			ASAH2B	CATSPER1	C5orf28	HIST1H2BD	ZNF836
FAH	RNF113A	PRRG4			ASAP1	CAV2	C5orf63	HIST1H2BG
FAM155B	RRP36	PSMA3			ASB14	CBLL1	C6orf120	HIST1H4B
FAM174B	RSPO2	PTCHD4			ASCC3	CCAR2	C6orf132	HIVEP2
FAM198A	RUNX1T1	PTGS2			ASH1L	CCDC137	C6orf48	HNRNPD
FAM43B	SERTAD4	PTPN21			ASH2L	CCDC3	C8orf31	HNRNPF
FAM84B	SFXN4	PTPRD			ASPM	CCDC59	C9orf72	HOPX
FANK1	SH3TC2	RAPGEF2			ASTN1	CCDC69	C9orf85	HOXB6
FAP	SKP2	RAPGEF4			ASTN2	CCDC8	CA8	HOXB7
FBXO5	SLC35G1	RBM39			ATAD2	CCDC86	CAAP1	HPDL
FCRLB	SLC4A4	RFPL3S			ATAD3A	CCDC88A	CACNA2D2	HPSE
FENDRR	SNRNP25	RFX3			ATAD3B	CCDC97	CADM1	HSPA2
FGD4	SOX13	RHOB			ATAD5	CCNB1	CALCOCO1	HSPB1
FGF9	SPATS2	RIC1			ATG14	CCT2	CALCRL	HSPD1
FGFR1OP2	SPC24	RPL32P3			ATG16L1	CCT3	CAMK1	IDH1
FMO5	ST6GALNAC4	RUFY3			ATG16L2	CCT7	CAMK2D	IFT81
FN1	SUFU	SARS			ATG7	CD14	CAMKK1	IL1A
FOSL2	SUV39H1	SAT1			ATHL1	CD22	CAPN12	IL1B
FOXA2	SVIP	SCN8A			ATL1	CD2BP2	CAPN3	IL24
FOXF1	TACO1	SEMA4B			ATM	CD33	CAPZA1	IL6ST
FRAS1	TBC1D30	SGK1			ATOX1	CD3EAP	CARD6	INSIG2
GABRE	TCEA1	SHROOM4			ATP13A4	CD44	CARD8	IQCG
GART	TFAP2A	SIM2			ATP1A3	CDADC1	CARF	IRX1
GATM	TICRR	SLC1A4			ATP1B1	CDC123	CAST	ISG20L2
GATS	TIMM8A	SLC25A36			ATP2A3	CDC14B	CCDC102B	ITPR1
GBP3	TIMM8B	SLC25A37			ATP5B	CDC20	CCDC125	ITPRIPL1
GDF11	TMCO6	SLC26A7			ATP5F1	CDC23	CCDC14	ITSN2
GDPD1	TRAPPC4	SLC2A3			ATP5G1	CDC42EP1	CCDC146	JAKMIP3
GGCX	TTPA	SLC38A2			ATP5O	CDH11	CCDC184	JARID2
GIMAP4	TUFM	SLC39A10			ATP5S	CDK12	CCDC191	JMJD1C
GINS4	UBE2L3	SLC4A7			ATP6V0C	CDK6	CCDC50	JUNB
GLIS3	XPNPEP3	SLC5A3			ATP6V1C1	CENPL	CCDC90B	KBTBD11
GLUL	ZNF107	SLC6A6			ATP6V1D	CENPM	CCDC92	KBTBD6
GMNN	ZNF367	SLC7A8			ATP8A1	CENPN	CCL2	KBTBD7
GOLGA8A	ZNF700	SNX9			ATRIP	CENPO	CCL20	KCNB2
GOLPH3L	ZNHIT1	SOX4			ATRX	CEP170	CCNDBP1	KDM6B
GPATCH2L		SRCIN1			ATXN3	CEP192	CCNG2	KIAA0355
GPR107		SRGAP3			AUNIP	CERCAM	CCNYL1	KIF18A
GREM1		ST7L			AURKAIP1	CGREF1	CCNYL2	KIF20A
GRIP1		STX2			AVIL	CHAF1A	CD69	KIF20B
GSAP		SYCP2			AXL	CHAF1B	CD8A	KITLG
GSDMB		TBC1D32			AZI2	CHCHD7	CD99P1	KLF13
H2AFJ		TCP11L2			AZIN1	CHD9	CDC14A	KLF3
HAS2		TM4SF1			B3GALNT2	CHERP	CDS2	KLHL24
HERPUD1		TMEM178A			B3GALT2	CHML	CECR2	KRCC1
HIRIP3		TNFRSF9			B3GAT1	CHORDC1	CECR6	KSR1
HIST1H2AG		TPCN2			B3GNT5	CHRNA9	CELF4	LBH
HIST1H2BC		TRAK1			B3GNT7	CHST3	CELF5	LCTL
HIST1H2BD		TRIB2			B4GALNT3	CKAP2L	CELSR2	LETM2
HIST1H2BG		TRIB3			B4GALT1	CKAP5	CEP126	LIF
HIST1H4B		TRIM73			B4GALT4	CKS1B	CEPT1	LINC00342
HIVEP2		TSGA10			B4GALT6	CLEC11A	CERK	LINC00460
HMGA2		TTBK2			BAALC	CLINT1	CFAP43	LINC00622
HNRNPD		TTLL3			BACE2	CLMP	CFAP52	LINC00969
HNRNPF		TUBE1			BACH2	CLN6	CFAP58	LNX1
HNRNPU		USP43			BAG4	CLPB	CFI	LOC100131262
HOPX		VEGFA			BAIAP2	CLTB	CFLAR	LOC100507600
HOXB5		VLDLR			BAZ1A	CNDP2	CGGBP1	LOC101929787
HOXB6		VPS13A			BBC3	CNN2	CHFR	LOC101930085
HOXB7		ZBED4			BBOF1	CNOT2	CHKB	LOC102606465
HPDL		ZBTB1			BBS1	CNOT4	CHN2	LOC102723694
HPSE		ZBTB38			BBS12	CNTN1	CHRD	LOC102723864
HSPA2		ZMYM2			BBS2	CNTRL	CHST9	LOC102724689
HSPB1		ZNF117			BBS7	COA7	CHURC1	LOC105369199
HSPD1		ZNF621			BBS9	COG2	CIPC	LOC105370333
HSPH1					BCAS2	COL16A1	CITED2	LOC105370687
ICAM1					BCL11A	COL23A1	CLCC1	LOC105370977
ICMT					BCL2A1	COL6A1	CLDN23	LOC105376896
IDH1					BCL2L13	COPG2	CLEC2B	LOC105379555
IFT81					BCL3	COPS6	CLIC6	LOC153682
IL1A					BCS1L	COPS8	CLTA	LOC219688
IL1B					BDH2	COX20	CMTM1	LOC283861
IL24					BDKRB2	COX4I1	CNR1	LOC284561
IL6ST					BEX2	COX6CP1	CNTNAP3	LOC285628
INSIG2					BFSP1	COX8A	COBL	LOC646014
INSR					BGN	CPLX1	COCH	LOC646778
IQCG					BICD1	CRABP2	COL13A1	LOC727820
IRAK2					BICD2	CSE1L	COL2A1	LOC79160
IRX1					BIN3	CSPP1	COL4A6	LPAR3
ISG20L2					BIRC3	CST3	COL8A2	LRIF1
ITPR1					BLM	CSTF2	COL9A3	LRRC15
ITPRIPL1					BLOC1S6	CSTF3	COQ2	LSM7
ITSN2					BMF	CTTN	CORO2A	LUC7L
JAKMIP3					BMP8B	CTU2	CORO2B	LY96
JARID2					BNC1	CUL4B	COX3	MAD2L1
JMJD1C					BNIP1	CWF19L2	CPD	MAGEA3
JUNB					BOLA3	CXCL12	CPS1	MAGEA6
KALRN					BOP1	CXorf56	CR2	MAGEL2
KBTBD11					BORCS8	CYB5RL	CRBN	MAGI3
KBTBD6					BPTF	CYC1	CRELD1	MAML3
KBTBD7					BRAF	CYP1A1	CRISPLD1	MANEAL
KCNB2					BRCA2	CYP2B6	CRKL	MANSC1
KDM6B					BRF2	CYP3A5	CRYZL1	MARCH6
KIAA0355					BRIX1	DAP3	CSDE1	MBOAT1
KIF18A					BRMS1	DBF4	CSF1	MBOAT2
KIF1A					BRMS1L	DBNL	CSF2RA	MCTP2
KIF20A					BRWD3	DCLK1	CSF3	MDM1
KIF20B					BTBD18	DCLRE1C	CSRNP3	MED28
KIF2C					BTN2A2	DCPS	CTHRC1	MEGF11
KITLG					BTN3A3	DCSTAMP	CTSK	MEPCE
KLF13					BUB1	DDIAS	CTTNBP2NL	MICALCL
KLF3					BUD31	DDX1	CXADR	MINCR
KLHL24					BYSL	DDX21	CXCL1	MIR210HG
KLHL29					C10orf10	DDX31	CXCL2	MMACHC
KLHL9					C10orf35	DDX39A	CXCL3	MMP10
KRCC1					C10orf88	DDX41	CXXC4	MRPS34
KSR1					C11orf24	DDX42	CYFIP2	MTFR2
LAMA4					C12orf43	DDX49	CYGB	MTMR9LP
LBH					C12orf56	DENND1B	CYLD	MYH3
LCTL					C12orf76	DESI1	CYP26B1	NAP1L3
LETM2					C14orf132	DFFA	CYP2J2	NCOA7
LIF					C14orf159	DGAT1	CYP4V2	NDUFB10
LINC00342					C14orf28	DGAT2	DACH1	NEDD9
LINC00460					C15orf40	DGKH	DAPK2	NFATC2
LINC00622					C15orf48	DGKZ	DBNDD1	NIPAL4
LINC00969					C16orf13	DHDDS	DCAF10	NLRP3
LINGO2					C16orf46	DHRS2	DCAF5	NMI
LLPH					C17orf100	DHX29	DCHS1	NOL4L
LNX1					C18orf21	DHX8	DDB2	NOX4
LOC100131262					C19orf48	DIAPH3	DDHD1	NREP
LOC100505549					C19orf52	DIEXF	DDR1	NRROS
LOC100507600					C1orf101	DIMT1	DDX10	OBFC1
LOC101927027					C1orf109	DIS3	DDX19B	ORC1
LOC101929147					C1orf112	DIS3L2	DDX20	OXCT1
LOC101929787					C1orf115	DKC1	DDX56	PAK3
LOC101930085					C1orf122	DLAT	DDX58	PALM2
LOC102606465					C1orf145	DLEU2	DDX60	PANK2
LOC102723694					C1orf21	DLL3	DENND2A	PCDH7
LOC102723864					C1orf216	DNAJA3	DENND2C	PCMTD2
LOC102724689					C1orf27	DNAJC11	DENND2D	PDE12
LOC105369199					C1orf54	DNAJC14	DENND4C	PDGFD
LOC105370333					C1orf61	DNAJC15	DEPDC5	PDS5A
LOC105370687					C1RL	DNAJC2	DFNA5	PDZD2
LOC105370977					C20orf194	DNAJC7	DGKQ	PELI2
LOC105376896					C21orf62	DNLZ	DHRS7	PER2
LOC105379555					C2CD4A	DOCK5	DICER1	PEX11A
LOC153682					C2CD4B	DOHH	DIRC2	PFDN6
LOC219688					C2orf44	DOT1L	DLL1	PGK1
LOC283861					C2orf81	DPM2	DNAH11	PGLS
LOC284561					C4orf36	DPM3	DNAH5	PHB
LOC285628					C4orf47	DPY19L2	DNAH7	PHLDA2
LOC401320					C5orf28	DPYSL3	DNAJC12	PIK3CD
LOC645513					C5orf63	DPYSL4	DNAJC18	PIK3R1
LOC646014					C6orf120	DRD2	DNAJC28	PLD6
LOC646778					C6orf132	DSCC1	DNAJC6	PLPP3
LOC727820					C6orf48	DTD1	DNTTIP1	PLPP4
LOC79160					C8orf31	DTYMK	DOCK8	PLPP6
LPAR3					C8orf33	DUS3L	DOK6	PNPO
LRIF1					C9orf114	DUSP14	DRAIC	PNRC1
LRRC15					C9orf3	DYRK1A	DRAM2	POLA2
LSM7					C9orf72	DYRK2	DSC2	POLD3
LUC7L					C9orf78	EARS2	DSG2	POLE3
LY96					C9orf85	EBF3	DTNA	POLI
MAD2L1					CA8	EBNA1BP2	DTWD1	POLR2L
MAGEA3					CAAP1	EBPL	DTX3	POLR3K
MAGEA6					CABLES1	ECI2	DTX3L	POMZP3
MAGEL2					CACNA1H	EEA1	DTX4	PPP1R12B
MAGI3					CACNA2D2	EED	DUOX1	PPP2CA
MAML3					CACYBP	EEF1D	DUSP18	PRKDC
MANEAL					CAD	EEF1E1	DYM	PRR9
MANSC1					CADM1	EFHD2	DZIP1	PRRG4
MAP3K12					CALB2	EFTUD2	EBF4	PRTG
MARCH6					CALCOCO1	EHD2	EBLN3	PSMA3
MBOAT1					CALCRL	EI24	ECHDC2	PSMC3
MBOAT2					CALD1	EIF1AD	EDEM1	PSRC1
MCAM					CAMK1	EIF2B3	EDIL3	PTCHD4
MCTP2					CAMK2D	EIF3A	EFNA5	PTGS2
MDM1					CAMKK1	EIF3B	EFNB3	PTHLH
MED28					CAMKMT	EIF3K	EGOT	PTK7
MEGF11					CAND1	EIF4EBP1	EIF2S1	PTPRF
MEPCE					CAPN12	EIF5B	EIF4E	RAPGEF2
METTL13					CAPN3	ELF4	EIF4EBP2	RAPGEF4
MICAL2					CAPZA1	ELFN2	EIF5A2	RBM15
MICALCL					CARD10	ELK4	ELF2	RBM39
MICALL1					CARD6	ELOVL1	ELL2	RERE
MINCR					CARD8	ELOVL2	ELMOD2	RFPL3S
MIR210HG					CARF	ELP3	EML5	RGCC
MKI67					CAST	EME1	ENOSF1	RHOB
MKL1					CATSPER1	EMG1	ENPEP	RHOC
MLX					CAV2	EMILIN2	ENPP4	RMND5B
MMACHC					CBLL1	EMP1	ENPP5	RNASEH2B
MMP10					CCAR2	EN2	ENTPD3	RNF113A
MPDZ					CCDC102B	ENAH	ENTPD5	RPL32P3
MRPL35					CCDC125	ENDOG	ENY2	RRP36
MRPL4					CCDC137	ENOX1	EPB41L4A	RSPO2
MRPL41					CCDC14	EPHB6	EPB41L4B	SC5D
MRPS34					CCDC146	EPS15L1	EPCAM	SCAI
MSRA					CCDC184	EPSTI1	EPS8L1	SCN8A
MTFR2					CCDC191	EPT1	EPS8L2	SEMA4B
MTMR9LP					CCDC3	ERG	ERC2	SERPINE1
MTRF1					CCDC50	ERGIC1	ERCC1	SERTAD4
MYEF2					CCDC59	ERGIC2	ERMP1	SFXN4
MYH3					CCDC69	ERI1	ERO1A	SGK1
NAP1L3					CCDC8	ERICH1	ESAM	SH3GL3
NAPA					CCDC86	ESF1	ESR2	SH3TC2
NCOA7					CCDC88A	ESPL1	ETV1	SHROOM4
NDUFA11					CCDC90B	ETF1	EVC2	SIM2
NDUFB10					CCDC92	ETHE1	EXD2	SKP2
NEDD9					CCDC97	EVA1C	EXPH5	SLC16A4
NFATC2					CCL2	EWSR1	EYS	SLC1A4
NIPAL4					CCL20	EXOC8	F2R	SLC26A7
NLRP3					CCNB1	EXOSC1	FADS2	SLC2A3
NMI					CCNDBP1	EXOSC2	FAHD2A	SLC35G1
NOL4L					CCNG2	EZH2	FAHD2CP	SLC38A2
NOVA1					CCNYL1	FABP4	FAM101B	SLC39A10
NOX4					CCNYL2	FABP5	FAM102B	SLC4A4
NRCAM					CCT2	FAM120A	FAM117B	SLC5A3
NREP					CCT3	FAM166A	FAM118A	SLC6A6
NRP2					CCT7	FAM167A	FAM120AOS	SLC7A8
NRROS					CD14	FAM19A4	FAM120B	SLCO5A1
NSDHL					CD22	FAM19A5	FAM124A	SLFN11
OBFC1					CD2BP2	FAM20B	FAM134B	SMAD7
OGT					CD33	FAM20C	FAM13A	SNN
ORC1					CD3EAP	FAM210A	FAM149A	SNRNP25
OXCT1					CD44	FAM3A	FAM160A1	SNX9
PA2G4					CD69	FAM98A	FAM161A	SORD
PAG1					CD8A	FANCB	FAM162B	SOWAHC
PAK3					CD99P1	FANCI	FAM177A1	SOX13
PALM2					CDADC1	FARP1	FAM189A1	SPATS2
PANK2					CDC123	FARSA	FAM200B	SPATS2L
PAPPA					CDC14A	FARSB	FAM209A	SPC24
PARP8					CDC14B	FAT3	FAM213A	SPHK1
PARVA					CDC20	FBF1	FAM214A	SRCIN1
PCDH7					CDC23	FBLN2	FAM219A	SRGAP3
PCDH9					CDC42EP1	FBXO31	FAM219B	STRIP2
PCMTD2					CDH11	FBXO32	FAM63B	SUFU
PCNX					CDK12	FCER2	FAM69A	SUN3
PDE12					CDK6	FERMT1	FAM83B	SUV39H1
PDE4D					CDS2	FGF1	FAT4	SVIP
PDGFD					CECR2	FGF14	FBXL2	SYCP2
PDS5A					CECR6	FGFBP1	FBXL20	TACO1
PDZD2					CELF4	FGFR2	FBXO10	TBC1D32
PELI2					CELF5	FGFRL1	FBXO34	TBX3
PER2					CELSR2	FH	FBXO9	TCEA1
PEX11A					CENPL	FIS1	FER	TFAP2A
PFDN6					CENPM	FKBP11	FER1L4	TICRR
PGK1					CENPN	FKBP4	FERMT2	TIGD7
PGLS					CENPO	FLAD1	FEV	TIMM8A
PHB					CEP126	FLNA	FEZ2	TIMM8B
PHLDA2					CEP170	FLNC	FGF11	TM4SF1
PHTF1					CEP192	FMN2	FGF12	TM4SF18
PIK3CD					CEPT1	FNDC3B	FGF19	TMCO6
PIK3R1					CERCAM	FOSL1	FGF2	TMEM107
PITPNC1					CERK	FOXF2	FILIP1	TMEM178A
PLD6					CFAP43	FOXM1	FIP1L1	TOB1
PLPP3					CFAP52	FOXRED1	FKBP7	TOR1AIP2
PLPP4					CFAP58	FPGS	FLCN	TPCN2
PLPP6					CFI	FRS2	FLJ31104	TRAK1
PNPO					CFLAR	FST	FLT4	TRAPPC4
PNRC1					CGGBP1	FUT10	FNDC5	TRIB2
POLA2					CGREF1	FXYD5	FOCAD	TRIB3
POLD3					CHAF1A	FZD8	FOXL2	TRIM27
POLE3					CHAF1B	G3BP1	FOXN3	TRIM59
POLI					CHCHD7	G6PC3	FOXRED2	TRIM73
POLR2L					CHD9	G6PD	FRA10AC1	TSPYL4
POLR3K					CHERP	GABBR2	FREM2	TTC30B
POMZP3					CHFR	GABRA2	FRG1CP	TTC39B
PPP1R12B					CHKB	GABRD	FRG1HP	TTLL3
PPP1R9A					CHML	GADD45GIP1	FRMD4B	TTPA
PPP2CA					CHN2	GAMT	FXR1	TUBE1
PRKDC					CHORDC1	GAPVD1	FYCO1	TUFM
PROSC					CHRD	GATA4	GAB1	UBE2L3
PRR9					CHRNA9	GCLM	GABBR1	UNC5B
PRRG4					CHST3	GDAP1	GAD1	UNC5D
PRTG					CHST9	GDF10	GAL3ST4	USP43
PSMA3					CHURC1	GEMIN5	GALNT16	VASN
PSMC3					CIPC	GEMIN6	GAS8	VEGFA
PSRC1					CITED2	GEMIN7	GATB	VGLL3
PTCHD4					CKAP2L	GFER	GATSL2	VLDLR
PTGS2					CKAP5	GFM1	GCA	VSTM4
PTHLH					CKS1B	GFOD1	GCH1	WNT7A
PTK7					CLCC1	GFRA1	GCNT2	XKRX
PTPN21					CLDN23	GIGYF2	GCNT4	XYLT1
PTPRD					CLEC11A	GJB2	GDAP2	ZBED4
PTPRF					CLEC2B	GJC1	GDPD3	ZBED8
RAPGEF2					CLIC6	GLE1	GEMIN2	ZMYM2
RAPGEF4					CLINT1	GLIPR1	GHDC	ZNF107
RBM14					CLMP	GLRX2	GHET1	ZNF175
RBM15					CLN6	GM2A	GLDC	ZNF268
RBM39					CLPB	GMPPB	GLDN	ZNF304
RBM43					CLTA	GNAL	GLIDR	ZNF367
RERE					CLTB	GNL2	GLIPR2	ZNF407
RFPL3S					CMTM1	GNL3L	GLRX	ZNF451
RFX3					CNDP2	GOLGA7	GLTP	ZNF621
RGCC					CNN2	GON4L	GLYATL2	ZNF700
RGS4					CNOT2	GOSR2	GNAI3	ZNF776
RHOB					CNOT4	GOT1	GNAT2	ZNHIT1
RHOC					CNR1	GPAA1	GNB5
RHOJ					CNTN1	GPAT4	GNG2
RIC1					CNTNAP3	GPATCH4	GNG4
RMND5B					CNTRL	GPC4	GOLGA2P5
RNASEH2B					COA7	GPR158	GOLGA8N
RNASEL					COBL	GPR50	GOLGB1
RNF113A					COCH	GPS1	GPHN
RPL32P3					COG2	GPX3	GPM6A
RRP36					COL13A1	GRIA3	GPR155
RSPO2					COL16A1	GRINA	GPR19
RUFY3					COL23A1	GRM8	GPRIN3
RUNX1T1					COL2A1	GRP	GPSM2
SAMD5					COL4A6	GRPEL1	GPX2
SARS					COL6A1	GRWD1	GRAMD2
SAT1					COL8A2	GSG2	GRAMD3
SAV1					COL9A3	GSR	GRAMD4
SC5D					COPG2	GTF2F2	GREB1
SCAI					COPS6	GTF2H1	GRIA4
SCN8A					COPS8	GTF3C2	GS1-259H13.2
SEMA4B					COQ2	GTF3C5	GSE1
SEMA7A					CORO2A	GTPBP4	GSTA4
SERPINE1					CORO2B	GULP1	GSTM1
SERTAD4					COX20	HABP4	GSTM2
SFXN4					COX3	HACD1	GSTM3
SGK1					COX4I1	HAUS7	GSTM4
SH3GL3					COX6CP1	HAUS8	GTDC1
SH3TC2					COX8A	HCCS	GTF2H5
SHROOM4					CPD	HDAC2	GTF2IRD2
SIM2					CPLX1	HDLBP	GTPBP2
SIX4					CPS1	HEATR1	GUSBP1
SKP2					CR2	HEATR3	H2AFY2
SLC16A4					CRABP2	HFE	HACD4
SLC1A4					CRBN	HGH1	HAGLR
SLC25A36					CRELD1	HHIPL2	HCLS1
SLC25A37					CRISPLD1	HIPK2	HDAC9
SLC26A7					CRKL	HIVEP3	HDX
SLC2A3					CRYZL1	HLF	HECTD1
SLC35G1					CSDE1	HM13	HECW1
SLC38A2					CSE1L	HMOX2	HERC6
SLC39A10					CSF1	HN1	HES1
SLC40A1					CSF2RA	HNRNPAB	HGF
SLC4A4					CSF3	HNRNPC	HID1
SLC4A7					CSPP1	HOMER3	HIF1A
SLC5A3					CSRNP3	HP1BP3	HIP1
SLC6A6					CST3	HPRT1	HIPK1
SLC7A8					CSTF2	HPS1	HIST1H2AK
SLCO5A1					CSTF3	HPS5	HIST3H2A
SLFN11					CTHRC1	HRH2	HLA-B
SLIT2					CTSK	HRSP12	HLA-C
SMAD7					CTTN	HS3ST3A1	HLA-DQB1
SMIM13					CTTNBP2NL	HS3ST3B1	HLA-E
SNN					CTU2	HS6ST2	HMGCS2
SNRNP25					CUL4B	HSPA14	HOMEZ
SNX9					CWF19L2	HSPA4	HOXB8
SORD					CXADR	HSPA9	HOXB9
SOWAHC					CXCL1	HSPBP1	HOXD1
SOX13					CXCL12	HSPE1	HPGD
SOX4					CXCL2	HTRA3	HS6ST3
SPATA7					CXCL3	IBA57	HSD17B11
SPATS2					CXorf56	ID2	HSPA1B
SPATS2L					CXXC4	IDH3A	HSPBAP1
SPC24					CYB5RL	IER3IP1	ICA1
SPHK1					CYC1	IER5L	ICOSLG
SRCIN1					CYFIP2	IFFO2	IDNK
SREK1IP1					CYGB	IFI30	IFI16
SRGAP1					CYLD	IGF2BP1	IFI27L2
SRGAP3					CYP1A1	IGFBP6	IFIH1
ST6GALNAC4					CYP26B1	IKBKG	IFITM1
ST7L					CYP2B6	IKZF3	IFT27
STK17B					CYP2J2	IL1RAP	IFT80
STRIP2					CYP3A5	IL1RAPL2	IGDCC4
STX2					CYP4V2	IL2RB	IGF1R
STYX					DACH1	ILF3	IGFBPL1
SUFU					DAP3	IMP4	IGHD3-16
SUN3					DAPK2	INF2	IGSF10
SUV39H1					DBF4	ING3	IGSF3
SVIP					DBNDD1	INHBB	IL13RA2
SYCP2					DBNL	INTS9	IL17RB
SYNJ2BP					DCAF10	INVS	IL17RD
TACO1					DCAF5	IPO11	IL18R1
TBC1D30					DCHS1	IPO4	IL31RA
TBC1D32					DCLK1	IPO5	IMPG1
TBX3					DCLRE1C	IPPK	INADL
TCEA1					DCPS	IRGQ	INPP1
TCP11L2					DCSTAMP	ISM1	INTU
TFAP2A					DDB2	ISOC2	IP6K2
TGFB2					DDHD1	ITFG1	IQCA1
TICRR					DDIAS	ITGB3	IQCH
TIGD7					DDR1	JAK1	IRF9
TIMM8A					DDX1	JMJD6	IRX4
TIMM8B					DDX10	JPH1	ISYNA1
TM4SF1					DDX19B	KAT6A	ITGA11
TM4SF18					DDX20	KBTBD4	ITGAX
TMCO6					DDX21	KCNC3	ITGB5
TMEM107					DDX31	KCNG3	ITPR2
TMEM178A					DDX39A	KCNK2	JADE1
TNFRSF9					DDX41	KCNK5	JAK2
TOB1					DDX42	KCNN3	JAKMIP1
TOR1AIP2					DDX49	KCNN4	JAKMIP2
TPCN2					DDX56	KCNQ2	JUND
TRAK1					DDX58	KCTD5	JUP
TRAPPC4					DDX60	KDELR3	KANSL1L
TRIB2					DENND1B	KHDRBS1	KCNA2
TRIB3					DENND2A	KHDRBS3	KCNAB1
TRIM27					DENND2C	KIAA1524	KCNB1
TRIM45					DENND2D	KIAA1586	KCND3
TRIM59					DENND4C	KIAA1755	KCNJ8
TRIM73					DEPDC5	KIF13A	KCNK10
TSGA10					DESI1	KIF18B	KCNMA1
TSPYL4					DFFA	KIF22	KCNT2
TTBK2					DFNA5	KIF7	KCTD20
TTC30B					DGAT1	KIFC1	KCTD21
TTC39B					DGAT2	KIRREL2	KCTD7
TTLL3					DGKH	KISS1	KDM4C
TTPA					DGKQ	KLHL18	KDM5C
TUBE1					DGKZ	KLHL21	KHNYN
TUFM					DHDDS	KMT2D	KIAA0141
TXNIP					DHRS2	KPNA2	KIAA0895
UBE2L3					DHRS7	KPNB1	KIAA0930
UNC5B					DHX29	KRR1	KIAA1109
UNC5D					DHX8	KRT7	KIAA1147
USP43					DIAPH3	KRTAP2-3	KIAA1211
VASN					DICER1	KRTCAP2	KIAA1217
VEGFA					DIEXF	L3MBTL4	KIAA1324L
VGLL3					DIMT1	LACTB2	KIAA1958
VLDLR					DIRC2	LAGE3	KIAA2026
VPS13A					DIS3	LAPTM5	KIF1C
VSTM4					DIS3L2	LARP1	KIF21B
WNT7A					DKC1	LARP4	KIF27
XKRX					DLAT	LAS1L	KIF5C
XPNPEP3					DLEU2	LENG1	KLC1
XYLT1					DLL1	LEPROTL1	KLF2
ZBED4					DLL3	LGALS1	KLHDC1
ZBED8					DNAH11	LGR5	KLHL22
ZBTB1					DNAH5	LHFP	KLHL28
ZBTB38					DNAH7	LIN9	KLHL5
ZMYM2					DNAJA3	LINC00116	KLHL7
ZNF107					DNAJC11	LINC00467	KRBA2
ZNF117					DNAJC12	LINC00624	L2HGDH
ZNF175					DNAJC14	LINC00630	L3MBTL1
ZNF225					DNAJC15	LINC01139	LACC1
ZNF268					DNAJC18	LINC01296	LACE1
ZNF302					DNAJC2	LMF1	LAMA3
ZNF304					DNAJC28	LMNA	LAMA5
ZNF367					DNAJC6	LMNB2	LAMP3
ZNF391					DNAJC7	LOC100129112	LAMTOR5
ZNF407					DNLZ	LOC100422526	LANCL3
ZNF426					DNTTIP1	LOC100505635	LARGE
ZNF451					DOCK5	LOC101928446	LARP1B
ZNF548					DOCK8	LOC101929480	LEKR1
ZNF621					DOHH	LOC102724880	LEPR
ZNF700					DOK6	LOC105374937	LGALS3
ZNF776					DOT1L	LOC105375492	LHFPL4
ZNF836					DPM2	LOC105378726	LIMA1
ZNHIT1					DPM3	LOC148413	LIN7A
					DPY19L2	LOC284219	LINC00094
					DPYSL3	LOC285812	LINC00265
					DPYSL4	LOC389834	LINC00323
					DRAIC	LOC441528	LINC00326
					DRAM2	LOC645321	LINC00476
					DRD2	LOC81691	LINC00537
					DSC2	LPA	LINC00623
					DSCC1	LRIG3	LINC00662
					DSG2	LRRC47	LINC00663
					DTD1	LRRC59	LINC00674
					DTNA	LRRFIP1	LINC00888
					DTWD1	LRWD1	LINC00899
					DTX3	LSM1	LINC00909
					DTX3L	LSM11	LINC00920
					DTX4	LTV1	LINC00944
					DTYMK	LYAR	LINC00960
					DUOX1	LZTS1	LINC01116
					DUS3L	MAGOH	LINC01138
					DUSP14	MAGOHB	LINC01215
					DUSP18	MAK16	LINC01305
					DYM	MALSU1	LINC01356
					DYRK1A	MAMDC2	LINC01410
					DYRK2	MAP2K3	LINC01537
					DZIP1	MAP7D3	LL0XNC01-250H12.3
					EARS2	MAPKAPK3	LMLN
					EBF3	MARCH3	LMO4
					EBF4	MCFD2	LOC100128108
					EBLN3	MCM10	LOC100128281
					EBNA1BP2	MCM4	LOC100128288
					EBPL	MCPH1	LOC100128988
					ECHDC2	MCTS1	LOC100129406
					ECI2	MCUR1	LOC100129550
					EDEM1	MDFIC	LOC100129917
					EDIL3	MDH2	LOC100131510
					EEA1	MECP2	LOC100132167
					EED	MED13	LOC100134937
					EEF1D	MED25	LOC100270804
					EEF1E1	MED26	LOC100288310
					EFHD2	MED27	LOC100505938
					EFNA5	MED4	LOC100506071
					EFNB3	MED8	LOC100506411
					EFTUD2	MEIOB	LOC100507395
					EGOT	MEOX2	LOC100507507
					EHD2	MEST	LOC100996251
					EI24	METAP2	LOC100996455
					EIF1AD	METRNL	LOC100996741
					EIF2B3	METTL9	LOC101060400
					EIF2S1	MFAP2	LOC101927098
					EIF3A	MFAP3L	LOC101927305
					EIF3B	MFN2	LOC101927432
					EIF3K	MFNG	LOC101928100
					EIF4E	MGP	LOC101928123
					EIF4EBP1	MIA	LOC101928504
					EIF4EBP2	MICAL3	LOC101929475
					EIF5A2	MID1	LOC101929511
					EIF5B	MIEF1	LOC102723809
					ELF2	MIS18A	LOC102724275
					ELF4	MLLT10	LOC102724418
					ELFN2	MME	LOC102725108
					ELK4	MMP19	LOC102725126
					ELL2	MN1	LOC105370606
					ELMOD2	MON1A	LOC105371220
					ELOVL1	MPC2	LOC105372733
					ELOVL2	MPHOSPH10	LOC105373754
					ELP3	MPND	LOC105374419
					EME1	MPP1	LOC105374984
					EMG1	MPRIP	LOC105376703
					EMILIN2	MPZL1	LOC105379448
					EML5	MRAP	LOC105379477
					EMP1	MRAP2	LOC152225
					EN2	MRPL12	LOC154761
					ENAH	MRPL15	LOC157562
					ENDOG	MRPL17	LOC202181
					ENOSF1	MRPL20	LOC283745
					ENOX1	MRPL21	LOC283788
					ENPEP	MRPL24	LOC284023
					ENPP4	MRPL27	LOC284080
					ENPP5	MRPL37	LOC285097
					ENTPD3	MRPL46	LOC285147
					ENTPD5	MRPL50	LOC374443
					ENY2	MRPL55	LOC388692
					EPB41L4A	MRPL57	LOC400756
					EPB41L4B	MRPS11	LOC403323
					EPCAM	MRPS12	LOC642852
					EPHB6	MRPS14	LOC643072
					EPS15L1	MRPS16	LOC692247
					EPS8L1	MRPS18A	LOC728613
					EPS8L2	MRPS25	LOC729291
					EPSTI1	MRPS28	LOC729970
					EPT1	MRPS30	LOC90246
					ERC2	MRPS7	LOX
					ERCC1	MRS2	LOXL4
					ERG	MRTO4	LPAR2
					ERGIC1	MSH2	LPAR4
					ERGIC2	MSI2	LPIN1
					ERI1	MSRB3	LRBA
					ERICH1	MSTO1	LRCH3
					ERMP1	MTBP	LRIG2
					ERO1A	MTCH2	LRP10
					ESAM	MTFR1	LRRC28
					ESF1	MTG2	LRRC37A2
					ESPL1	MTHFD1L	LRRC37A3
					ESR2	MTPAP	LRRC6
					ETF1	MTR	LRRC75B
					ETHE1	MTX1	LRRN1
					ETV1	MYADM	LRTM1
					EVA1C	MYBBP1A	LSS
					EVC2	MYBL1	LTB4R
					EWSR1	MYO10	LTBP4
					EXD2	MYO19	LXN
					EXOC8	NAA10	LZTFL1
					EXOSC1	NADK	MAGI1
					EXOSC2	NAF1	MAL
					EXPH5	NAPRT	MALAT1
					EYS	NAT1	MAML2
					EZH2	NAT10	MAN1A2
					F2R	NBPF1	MAN2A1
					FABP4	NCAPD3	MAN2A2
					FABP5	NCAPG	MANBA
					FADS2	NCAPH	MANEA
					FAHD2A	NDC80	MAOB
					FAHD2CP	NDST1	MAP2
					FAM101B	NDUFA1	MAP2K4
					FAM102B	NDUFA10	MAP3K3
					FAM117B	NDUFA3	MAP3K8
					FAM118A	NDUFA6	MAP3K9
					FAM120A	NDUFAF3	MAP4K4
					FAM120AOS	NDUFAF4	MAP4K5
					FAM120B	NDUFB11	MAP6
					FAM124A	NDUFB7	MAPK11
					FAM134B	NDUFS3	MAPK12
					FAM13A	NDUFS7	MARVELD2
					FAM149A	NENF	MAX
					FAM160A1	NETO2	MBD5
					FAM161A	NF2	MCOLN3
					FAM162B	NFASC	MCTP1
					FAM166A	NFKBIB	MDH1B
					FAM167A	NFRKB	MED6
					FAM177A1	NFYC	MEDAG
					FAM189A1	NGFR	MEF2C
					FAM19A4	NHP2	MEGF6
					FAM19A5	NID1	MEIG1
					FAM200B	NKIRAS2	MEIS3P1
					FAM209A	NKRF	MERTK
					FAM20B	NLRP11	METAP1D
					FAM20C	NME1	METTL14
					FAM210A	NMNAT2	METTL6
					FAM213A	NMT1	MFSD6
					FAM214A	NOC2L	MGAT4A
					FAM219A	NOC4L	MGST2
					FAM219B	NOCT	MICAL1
					FAM3A	NOL11	MINK1
					FAM63B	NOL12	MIPOL1
					FAM69A	NOL7	MIR3681HG
					FAM83B	NOL8	MLKL
					FAM98A	NOL9	MLXIP
					FANCB	NOLC1	MMAA
					FANCI	NOMO3	MMAB
					FARP1	NOP16	MMP9
					FARSA	NOP58	MOAP1
					FARSB	NOP9	MOB3B
					FAT3	NPRL3	MOCOS
					FAT4	NPTX2	MOV10
					FBF1	NR2F2	MOXD1
					FBLN2	NRF1	MPZL2
					FBXL2	NRG1	MPZL3
					FBXL20	NRK	MR1
					FBXO10	NSF	MREG
					FBXO31	NSRP1	MRPL42
					FBXO32	NTMT1	MSRB2
					FBXO34	NUDCD1	MST1
					FBXO9	NUDT19	MTHFD2L
					FCER2	NUDT5	MTUS1
					FER	NUF2	MXD4
					FER1L4	NUFIP1	MYL12A
					FERMT1	NUP155	MYO1D
					FERMT2	NUP188	MYO5B
					FEV	NUP214	MYO6
					FEZ2	NUP43	N4BP2L1
					FGF1	NUP62	NACAD
					FGF11	NUP98	NAIP
					FGF12	NUPR1	NARF
					FGF14	NVL	NATD1
					FGF19	OCLM	NBPF3
					FGF2	OGFOD3	NBR2
					FGFBP1	OLFM2	NCOA6
					FGFR2	OLIG2	NDNF
					FGFRL1	ONECUT2	NDRG4
					FH	ORAOV1	NEFM
					FILIP1	ORC5	NEGR1
					FIP1L1	OSBPL8	NEK11
					FIS1	OSCAR	NEK9
					FKBP11	PA2G4P2	NFATC4
					FKBP4	PACRGL	NFE2L3
					FKBP7	PACSIN2	NFIB
					FLAD1	PAK1IP1	NFKBIA
					FLCN	PAM16	NFKBIZ
					FLJ31104	PAPOLG	NIN
					FLNA	PARP1	NINL
					FLNC	PAWR	NIPA1
					FLT4	PAX1	NIPSNAP3B
					FMN2	PAX7	NKX2-1
					FNDC3B	PBK	NMRK1
					FNDC5	PC	NOL3
					FOCAD	PCDHB10	NPAS2
					FOSL1	PCOLCE	NPC1
					FOXF2	PDAP1	NPNT
					FOXL2	PDE6D	NPR2
					FOXM1	PDE7A	NPY1R
					FOXN3	PDE8B	NPY5R
					FOXRED1	PDLIM5	NR2E1
					FOXRED2	PDPN	NR4A2
					FPGS	PDS5B	NR5A2
					FRA10AC1	PDSS1	NRAS
					FREM2	PDZRN3	NRG2
					FRG1CP	PEA15	NSUN6
					FRG1HP	PES1	NT5DC1
					FRMD4B	PEX14	NTN1
					FRS2	PFKP	NTNG1
					FST	PGM2	NUBPL
					FUT10	PGP	NUDT3
					FXR1	PHAX	NUDT6
					FXYD5	PHF5A	NUDT9P1
					FYCO1	PHTF2	NUP210
					FZD8	PIGF	NUP62CL
					G3BP1	PIGK	NUTF2
					G6PC3	PIGP	NXPE3
					G6PD	PINLYP	OCLN
					GAB1	PINX1	ODF2L
					GABBR1	PIP4K2A	OGFRL1
					GABBR2	PITHD1	OPTN
					GABRA2	PITRM1	OR2L13
					GABRD	PITX1	ORAI3
					GAD1	PKMYT1	ORC4
					GADD45GIP1	PLA2G5	OSBPL10
					GAL3ST4	PLA2G7	OSBPL2
					GALNT16	PLEC	OSCP1
					GAMT	PLK3	OTUB2
					GAPVD1	PLOD3	OTUD4
					GAS8	PLTP	OVGP1
					GATA4	PLXDC2	P4HA1
					GATB	PLXNA2	PAK2
					GATSL2	PLXNA4	PAN2
					GCA	PMS1	PAOX
					GCH1	PMVK	PAPLN
					GCLM	PNMA6A	PAPOLA
					GCNT2	PNMAL1	PAQR3
					GCNT4	PNO1	PAQR8
					GDAP1	PNPT1	PARM1
					GDAP2	PODXL	PARP14
					GDF10	POFUT1	PARP9
					GDPD3	POLD1	PARVG
					GEMIN2	POLDIP3	PASD1
					GEMIN5	POLQ	PCDH10
					GEMIN6	POLR1A	PCED1A
					GEMIN7	POLR2D	PCGF3
					GFER	POLR2F	PCSK5
					GFM1	POLR3A	PDE11A
					GFOD1	POLR3D	PDE3A
					GFRA1	POLR3H	PDE4DIP
					GHDC	POP1	PDE5A
					GHET1	POP4	PDE9A
					GIGYF2	POP7	PDGFRA
					GJB2	POU3F2	PFKFB2
					GJC1	PPAN	PFKFB4
					GLDC	PPARD	PGF
					GLDN	PPARGC1B	PGPEP1
					GLE1	PPIE	PHACTR2
					GLIDR	PPP1R12A	PHF10
					GLIPR1	PPP1R1A	PHF11
					GLIPR2	PPP2R2A	PHGDH
					GLRX	PPRC1	PIGG
					GLRX2	PRADC1	PIGL
					GLTP	PRC1	PIGZ
					GLYATL2	PRCC	PIK3C3
					GM2A	PRDM16	PIK3CG
					GMPPB	PRELID1	PIK3IP1
					GNAI3	PREP	PIP5K1B
					GNAL	PREX2	PIRC66
					GNAT2	PRKCE	PKP2
					GNB5	PRMT1	PLA2G16
					GNG2	PRO2958	PLA2G4C
					GNG4	PROSER2	PLCG1
					GNL2	PRPF18	PLCG2
					GNL3L	PRPF19	PLCL1
					GOLGA2P5	PRPF31	PLCXD2
					GOLGA7	PRPF38A	PLD1
					GOLGA8N	PRPF4	PLEK2
					GOLGB1	PRPF40A	PLEKHA7
					GON4L	PRPS1	PLEKHG1
					GOSR2	PRR11	PLEKHH1
					GOT1	PRR16	PLEKHH2
					GPAA1	PRR5L	PLLP
					GPAT4	PRRC2C	PMAIP1
					GPATCH4	PRRX1	PNMA1
					GPC4	PRRX2	PNPLA6
					GPHN	PRSS23	POM121L9P
					GPM6A	PSMB3	PPA2
					GPR155	PSMC3IP	PPARA
					GPR158	PSMC4	PPARGC1A
					GPR19	PSMD1	PPM1A
					GPR50	PSMD12	PPM1K
					GPRIN3	PSMD3	PPM1L
					GPS1	PSME3	PPP2R3C
					GPSM2	PSMG2	PPP2R5C
					GPX2	PSPC1	PPP2R5E
					GPX3	PSTPIP2	PPP3CA
					GRAMD2	PTBP1	PPP4R1L
					GRAMD3	PTGES	PRCD
					GRAMD4	PTGR1	PRDM5
					GREB1	PTGS1	PRKAA2
					GRIA3	PTK2	PRKACB
					GRIA4	PTPN14	PRKCH
					GRINA	PTPN2	PRKD1
					GRM8	PTPRG	PRKG1
					GRP	PTPRZ1	PRMT2
					GRPEL1	PTRF	PROM1
					GRWD1	PTTG3P	PROS1
					GS1-259H13.2	PUF60	PROX1
					GSE1	PUM3	PROX2
					GSG2	PURA	PRR14L
					GSR	PUSL1	PRR18
					GSTA4	PVR	PSEN1
					GSTM1	PVT1	PSIP1
					GSTM2	PWWP2A	PSMA5
					GSTM3	PYCR2	PTGFRN
					GSTM4	PYCRL	PTK6
					GTDC1	PYGB	PTPRN2
					GTF2F2	PYROXD1	PTPRO
					GTF2H1	QPRT	PWAR6
					GTF2H5	QTRT1	PYGL
					GTF2IRD2	R3HCC1	PYROXD2
					GTF3C2	RAB2A	QPCT
					GTF3C5	RAB3GAP2	RAB11FIP4
					GTPBP2	RABEPK	RAB15
					GTPBP4	RAD18	RAB27A
					GULP1	RAD54B	RAB3C
					GUSBP1	RAMP1	RAB3IP
					H2AFY2	RANBP17	RAB4A
					HABP4	RANGAP1	RAB6B
					HACD1	RARS	RAD51B
					HACD4	RASAL2	RAI14
					HAGLR	RASL11B	RALGAPA1
					HAUS7	RBFA	RALGAPA2
					HAUS8	RBL1	RAMP2
					HCCS	RBM10	RAP1A
					HCLS1	RBM12B	RAP1GDS1
					HDAC2	RBM17	RASA2
					HDAC9	RBM24	RASD1
					HDLBP	RBM26	RASGRF2
					HDX	RBM27	RASSF2
					HEATR1	RBM28	RBFOX2
					HEATR3	RBM33	RBMS3
					HECTD1	RBM34	RBP4
					HECW1	RBPMS	RBP7
					HERC6	RBX1	RDH11
					HES1	RC3H2	REG4
					HFE	RCAN1	REPS2
					HGF	RCC1	RET
					HGH1	RDH13	RFPL3
					HHIPL2	RECQL4	RGL1
					HID1	REEP4	RGL2
					HIF1A	RFC3	RGL3
					HIP1	RGAG1	RGP1
					HIPK1	RGS20	RGS12
					HIPK2	RGS5	RGS3
					HIST1H2AK	RIOK1	RGS9
					HIST3H2A	RIOK2	RHBDD1
					HIVEP3	RNASEH1	RHOF
					HLA-B	RNASEH2A	RIMKLA
					HLA-C	RNASEH2C	RNASE4
					HLA-DQB1	RNF130	RNF112
					HLA-E	RNF152	RNF128
					HLF	RNF219	RNF141
					HM13	RNF40	RNF144A
					HMGCS2	RNF6	RNF150
					HMOX2	RNGTT	RNF180
					HN1	RNPS1	RNF207
					HNRNPAB	RP9	RNF212B
					HNRNPC	RPF2	RNF213
					HOMER3	RPL13	RNF217
					HOMEZ	RPL26L1	RNF32
					HOXB8	RPP38	RNF38
					HOXB9	RPP40	RNFT2
					HOXD1	RPRD1A	RNPC3
					HP1BP3	RPS19BP1	ROBO2
					HPGD	RQCD1	ROR2
					HPRT1	RRAS2	RPH3AL
					HPS1	RRM1	RPL28
					HPS5	RRN3P2	RPP30
					HRH2	RRN3P3	RPS15A
					HRSP12	RRP12	RPS29
					HS3ST3A1	RRP15	RPS6KA2
					HS3ST3B1	RRP7A	RRAGA
					HS6ST2	RRP8	RSBN1
					HS6ST3	RRP9	RSPH9
					HSD17B11	RRS1	RTN1
					HSPA14	RSBN1L	RUBCN
					HSPA1B	RSL1D1	RUFY2
					HSPA4	RSU1	RWDD2A
					HSPA9	RTTN	SALL4
					HSPBAP1	RUVBL2	SAMD12
					HSPBP1	S100A4	SAMD13
					HSPE1	S1PR3	SAMD3
					HTRA3	SAE1	SARM1
					IBA57	SALL3	SBF1
					ICA1	SART3	SCARB2
					ICOSLG	SATB2	SCARF1
					ID2	SBSN	SCD5
					IDH3A	SCAF11	SCFD1
					IDNK	SCAF4	SCN3B
					IER3IP1	SCAMP3	SCUBE1
					IER5L	SCARA3	SEC31B
					IFFO2	SCARA5	SEC61B
					IFI16	SCARB1	SEL1L
					IFI27L2	SCFD2	SEMA4D
					IFI30	SCLT1	SEMA6A
					IFIH1	SDC1	SENP2
					IFITM1	SDC2	SEPT8
					IFT27	SDCCAG8	SERPINA10
					IFT80	SDF2L1	SERPINA3
					IGDCC4	SDF4	SERPIND1
					IGF1R	SDHAF2	SERPINI1
					IGF2BP1	SEC14L1	SETD7
					IGFBP6	SEH1L	SFI1
					IGFBPL1	SENP3	SFXN3
					IGHD3-16	SEPHS1	SGCB
					IGSF10	SEPT6	SGPP1
					IGSF3	SEPT9	SH3BP2
					IKBKG	SERINC2	SH3GL2
					IKZF3	SERPINB2	SH3GLB1
					IL13RA2	SERPINB7	SH3PXD2A
					IL17RB	SERPINF1	SHC2
					IL17RD	SF3A2	SHC3
					IL18R1	SF3A3	SHF
					IL1RAP	SFRP1	SHTN1
					IL1RAPL2	SFT2D2	SIKE1
					IL2RB	SFXN2	SIPA1L1
					IL31RA	SGCD	SIPA1L2
					ILF3	SGF29	SIRT5
					IMP4	SGK223	SKAP1
					IMPG1	SGMS2	SLC10A1
					INADL	SH2D4A	SLC12A5
					INF2	SH3BP4	SLC12A6
					ING3	SHC1	SLC15A2
					INHBB	SHCBP1	SLC16A1
					INPP1	SHISA2	SLC16A5
					INTS9	SHISA9	SLC1A1
					INTU	SHPK	SLC22A15
					INVS	SIRPA	SLC24A5
					IP6K2	SIRPB1	SLC25A24
					IPO11	SKA3	SLC25A27
					IPO4	SLC10A3	SLC25A29
					IPO5	SLC12A9	SLC25A42
					IPPK	SLC16A2	SLC25A45
					IQCA1	SLC16A7	SLC25A51
					IQCH	SLC19A1	SLC26A11
					IRF9	SLC22A18	SLC27A2
					IRGQ	SLC22A4	SLC27A6
					IRX4	SLC25A11	SLC2A10
					ISM1	SLC25A15	SLC30A4
					ISOC2	SLC25A32	SLC33A1
					ISYNA1	SLC25A44	SLC38A4
					ITFG1	SLC2A13	SLC38A6
					ITGA11	SLC30A1	SLC39A4
					ITGAX	SLC35A4	SLC41A2
					ITGB3	SLC35D1	SLC44A5
					ITGB5	SLC35F1	SLC45A1
					ITPR2	SLC35F5	SLC46A3
					JADE1	SLC37A2	SLC8A3
					JAK1	SLC38A10	SLC9A7
					JAK2	SLC39A3	SLFN13
					JAKMIP1	SLC41A1	SLFN5
					JAKMIP2	SLC4A1AP	SLIT1
					JMJD6	SLC52A2	SMA4
					JPH1	SLC7A2	SMARCA1
					JUND	SLC8A1	SMOC1
					JUP	SLC9A1	SNAPC1
					KANSL1L	SLITRK2	SNAPC3
					KAT6A	SMAD5	SNCA
					KBTBD4	SMAD6	SNHG10
					KCNA2	SMCHD1	SNX1
					KCNAB1	SMDT1	SNX21
					KCNB1	SMG1	SNX33
					KCNC3	SMG9	SORT1
					KCND3	SMIM7	SOS2
					KCNG3	SMUG1	SOX30
					KCNJ8	SNAI2	SP110
					KCNK10	SNHG12	SPAG8
					KCNK2	SNORD8	SPATA6L
					KCNK5	SNRPD1	SPIDR
					KCNMA1	SNU13	SPINT1
					KCNN3	SNX8	SPRED1
					KCNN4	SOCS5	SPTLC2
					KCNQ2	SOD1	SQRDL
					KCNT2	SON	SRGAP2B
					KCTD20	SORBS2	SRSF5
					KCTD21	SOS1	SSBP2
					KCTD5	SOX8	SSH2
					KCTD7	SPAG5	SSPN
					KDELR3	SPARC	SSTR2
					KDM4C	SPATA13	ST6GAL1
					KDM5C	SPC25	ST6GALNAC3
					KHDRBS1	SPDL1	ST8SIA4
					KHDRBS3	SPEN	STAG3L4
					KHNYN	SPRTN	STAMBPL1
					KIAA0141	SPRYD4	STAP2
					KIAA0895	SPTLC1	STARD9
					KIAA0930	SPTY2D1	STAT5A
					KIAA1109	SRA1	STAT6
					KIAA1147	SRCAP	STAU2
					KIAA1211	SRFBP1	STC1
					KIAA1217	SRM	STMN2
					KIAA1324L	SRRD	STOM
					KIAA1524	SRSF10	STRC
					KIAA1586	SRSF7	STRIP1
					KIAA1755	SSR4	STRN
					KIAA1958	SSSCA1	STRN3
					KIAA2026	ST3GAL1	STX1A
					KIF13A	ST3GAL4	STXBP3
					KIF18B	ST8SIA2	STXBP5
					KIF1C	STARD13	SULF1
					KIF21B	STEAP1	SULF2
					KIF22	STIP1	SULT4A1
					KIF27	STK24	SUMF1
					KIF5C	STOML1	SUPT3H
					KIF7	STRA13	SUSD1
					KIFC1	STRA6	SUZ12
					KIRREL2	STXBP6	SYN2
					KISS1	SUCLG1	SYNE2
					KLC1	SUGT1	SYNJ2
					KLF2	SURF2	SYT9
					KLHDC1	SURF6	SYTL5
					KLHL18	SUSD4	TACC2
					KLHL21	SUV39H2	TAF13
					KLHL22	SWI5	TAF8
					KLHL28	SYMPK	TAF9B
					KLHL5	SYNCRIP	TANK
					KLHL7	SYNGR1	TBC1D16
					KMT2D	SYNJ1	TBC1D9
					KPNA2	SYNRG	TBX15
					KPNB1	SZRD1	TBXAS1
					KRBA2	SZT2	TCAIM
					KRR1	TACC1	TECPR2
					KRT7	TADA2A	TET2
					KRTAP2-3	TAF5L	TFDP2
					KRTCAP2	TAGLN2	TGFBR3
					L2HGDH	TAGLN3	TGOLN2
					L3MBTL1	TALDO1	THBS4
					L3MBTL4	TARBP2	THEM5
					LACC1	TBC1D31	TIA1
					LACE1	TBCD	TIAM2
					LACTB2	TBCE	TIFA
					LAGE3	TBK1	TIGD1
					LAMA3	TBL3	TM4SF20
					LAMA5	TBRG4	TMEFF2
					LAMP3	TBX2	TMEM108
					LAMTOR5	TCF20	TMEM132A
					LANCL3	TCF25	TMEM150C
					LAPTM5	TCF7	TMEM156
					LARGE	TCOF1	TMEM167B
					LARP1	TEAD4	TMEM170B
					LARP1B	TEF	TMEM171
					LARP4	TENM2	TMEM173
					LAS1L	TERF2	TMEM185B
					LEKR1	TEX15	TMEM219
					LENG1	TEX261	TMEM242
					LEPR	TFB2M	TMEM30A
					LEPROTL1	TFIP11	TMEM56
					LGALS1	TFPI2	TMEM87B
					LGALS3	TGFB1	TMOD1
					LGR5	TGFBRAP1	TMTC4
					LHFP	TGS1	TNF
					LHFPL4	THADA	TNFAIP2
					LIMA1	THAP4	TNFAIP3
					LIN7A	THBS2	TNFAIP8L3
					LIN9	THG1L	TNFRSF10A
					LINC00094	THRAP3	TNFRSF1B
					LINC00116	TIMM10	TNFRSF25
					LINC00265	TIMM13	TNIK
					LINC00323	TIMM17A	TNKS2
					LINC00326	TIMM22	TOM1L2
					LINC00467	TIMM23	TP53BP1
					LINC00476	TIMM50	TP53INP1
					LINC00537	TIMP1	TP53INP2
					LINC00623	TIMP2	TPD52L1
					LINC00624	TIPIN	TPGS2
					LINC00630	TK1	TPTE2P1
					LINC00662	TKT	TRABD
					LINC00663	TLDC1	TRADD
					LINC00674	TLE1	TRERF1
					LINC00888	TMC7	TRIM16
					LINC00899	TMEM120A	TRIM2
					LINC00909	TMEM132E	TRIM21
					LINC00920	TMEM147	TRIM33
					LINC00944	TMEM14B	TRIM36
					LINC00960	TMEM14C	TRIM69
					LINC01116	TMEM163	TRIM9
					LINC01138	TMEM178B	TRMT5
					LINC01139	TMEM19	TRNT1
					LINC01215	TMEM201	TRO
					LINC01296	TMEM255A	TRPA1
					LINC01305	TMEM64	TRPC1
					LINC01356	TMEM75	TRPM6
					LINC01410	TMEM80	TSC1
					LINC01537	TMTC1	TSPYL5
					LL0XNC01-250H12.3	TNFRSF10B	TTC23
					LMF1	TNFRSF11A	TTC28
					LMLN	TNFRSF21	TTC33
					LMNA	TNPO1	TTC5
					LMNB2	TNPO3	TTC8
					LMO4	TNS1	TTC9
					LOC100128108	TOMM22	TTLL11
					LOC100128281	TOMM40	TTLL5
					LOC100128288	TOP1MT	TTLL7
					LOC100128988	TP53I11	TUBBP5
					LOC100129112	TPM3	TUG1
					LOC100129406	TPR	TXNDC16
					LOC100129550	TPRKB	UBA6
					LOC100129917	TRAPPC5	UBE2D3
					LOC100131510	TRHDE	UBE2J1
					LOC100132167	TRIM24	UBE2Q2P6
					LOC100134937	TRIM35	UBE2QL1
					LOC100270804	TRIM4	UBE2R2
					LOC100288310	TRIM58	UBN2
					LOC100422526	TRIO	ULK2
					LOC100505635	TRMT1	UNC13B
					LOC100505938	TRMT6	UQCC2
					LOC100506071	TROAP	USO1
					LOC100506411	TRRAP	USP30
					LOC100507395	TSFM	USP44
					LOC100507507	TSN	USP45
					LOC100996251	TSPAN12	VANGL1
					LOC100996455	TSPAN4	VAV3
					LOC100996741	TSTA3	VEPH1
					LOC101060400	TTC4	VEZT
					LOC101927098	TTC7A	VIPAS39
					LOC101927305	TTF1	VNN1
					LOC101927432	TTI2	VPS13C
					LOC101928100	TUBA4A	VPS8
					LOC101928123	TUBB3	VSNL1
					LOC101928446	TUBB4B	VTI1B
					LOC101928504	TUBG1	VWA5A
					LOC101929475	TUNAR	WARS2
					LOC101929480	TVP23C	WASIR2
					LOC101929511	TWIST2	WDFY3
					LOC102723809	TWISTNB	WDR19
					LOC102724275	UAP1	WDR3
					LOC102724418	UBA2	WDR47
					LOC102724880	UBE2Q1	WDR59
					LOC102725108	UBE3C	WDR60
					LOC102725126	UBE3D	WDR72
					LOC105370606	UBL3	WDR73
					LOC105371220	UBQLN4	WFDC10B
					LOC105372733	UCHL5	WFDC3
					LOC105373754	UCK2	WIF1
					LOC105374419	UGGT2	WIPF1
					LOC105374937	UNC5A	WIPF3
					LOC105374984	UPF2	WLS
					LOC105375492	UPF3B	WNK3
					LOC105376703	UQCC3	WNT2B
					LOC105378726	UQCRQ	WWTR1
					LOC105379448	URB1	XPNPEP1
					LOC105379477	USP14	YPEL1
					LOC148413	USP15	YPEL3
					LOC152225	USP16	YWHAH
					LOC154761	USP24	YY1
					LOC157562	USP36	ZADH2
					LOC202181	USPL1	ZBTB22
					LOC283745	UTP14A	ZBTB25
					LOC283788	UTP15	ZBTB4
					LOC284023	UTP23	ZBTB5
					LOC284080	UTP4	ZC3H12C
					LOC284219	UTRN	ZC3H14
					LOC285097	VARS	ZDHHC21
					LOC285147	VCPIP1	ZFAND5
					LOC285812	VDAC3	ZFP57
					LOC374443	VMA21	ZFP82
					LOC388692	VPS26B	ZFP90
					LOC389834	VPS37A	ZFYVE1
					LOC400756	VRK1	ZFYVE26
					LOC403323	VSTM1	ZFYVE28
					LOC441528	VTI1A	ZHX2
					LOC642852	WDR1	ZIC1
					LOC643072	WDR12	ZIC4
					LOC645321	WDR43	ZKSCAN3
					LOC692247	WDR46	ZKSCAN7
					LOC728613	WDR5	ZMAT1
					LOC729291	WDR61	ZMIZ2
					LOC729970	WDR74	ZMYM6
					LOC81691	WHAMM	ZNF134
					LOC90246	WHSC1L1	ZNF136
					LOX	WNK4	ZNF137P
					LOXL4	WNT10B	ZNF138
					LPA	WRN	ZNF14
					LPAR2	WWC1	ZNF140
					LPAR4	WWP2	ZNF155
					LPIN1	XPO4	ZNF160
					LRBA	XPO6	ZNF165
					LRCH3	XPO7	ZNF185
					LRIG2	XRCC1	ZNF19
					LRIG3	XRCC6	ZNF204P
					LRP10	XYLB	ZNF222
					LRRC28	YDJC	ZNF224
					LRRC37A2	YEATS2	ZNF232
					LRRC37A3	YIF1A	ZNF234
					LRRC47	YIF1B	ZNF250
					LRRC59	YRDC	ZNF251
					LRRC6	YTHDF3	ZNF253
					LRRC75B	YY1AP1	ZNF254
					LRRFIP1	ZBTB2	ZNF264
					LRRN1	ZBTB6	ZNF266
					LRTM1	ZC3H13	ZNF286A
					LRWD1	ZC3H7B	ZNF320
					LSM1	ZCCHC10	ZNF326
					LSM11	ZDHHC24	ZNF33B
					LSS	ZFC3H1	ZNF354C
					LTB4R	ZFP36L2	ZNF37BP
					LTBP4	ZHX1	ZNF382
					LTV1	ZHX1-C8orf76	ZNF385B
					LXN	ZIC3	ZNF385D
					LYAR	ZMAT2	ZNF396
					LZTFL1	ZMYND11	ZNF397
					LZTS1	ZNF124	ZNF410
					MAGI1	ZNF215	ZNF416
					MAGOH	ZNF275	ZNF419
					MAGOHB	ZNF280C	ZNF420
					MAK16	ZNF354B	ZNF431
					MAL	ZNF365	ZNF440
					MALAT1	ZNF488	ZNF510
					MALSU1	ZNF519	ZNF514
					MAMDC2	ZNF526	ZNF518B
					MAML2	ZNF574	ZNF529
					MAN1A2	ZNF587B	ZNF536
					MAN2A1	ZNF592	ZNF543
					MAN2A2	ZNF593	ZNF546
					MANBA	ZNF598	ZNF562
					MANEA	ZNF638	ZNF567
					MAOB	ZNF668	ZNF573
					MAP2	ZNF696	ZNF599
					MAP2K3	ZNF703	ZNF606
					MAP2K4	ZNF789	ZNF625
					MAP3K3	ZNHIT6	ZNF658
					MAP3K8	ZUFSP	ZNF697
					MAP3K9	ZW10	ZNF704
					MAP4K4		ZNF711
					MAP4K5		ZNF718
					MAP6		ZNF732
					MAP7D3		ZNF75A
					MAPK11		ZNF793
					MAPK12		ZNF813
					MAPKAPK3		ZNF814
					MARCH3		ZNF827
					MARVELD2		ZNF83
					MAX		ZNF84
					MBD5		ZNF85
					MCFD2		ZNF852
					MCM10		ZNF853
					MCM4		ZNF862
					MCOLN3		ZRANB1
					MCPH1		ZRANB3
					MCTP1		ZSCAN16
					MCTS1		ZSCAN18
					MCUR1		ZSCAN30
					MDFIC		ZSWIM4
					MDH1B		ZXDA
					MDH2		ZXDB
					MECP2		ZXDC
					MED13		ZYX
					MED25
					MED26
					MED27
					MED4
					MED6
					MED8
					MEDAG
					MEF2C
					MEGF6
					MEIG1
					MEIOB
					MEIS3P1
					MEOX2
					MERTK
					MEST
					METAP1D
					METAP2
					METRNL
					METTL14
					METTL6
					METTL9
					MFAP2
					MFAP3L
					MFN2
					MFNG
					MFSD6
					MGAT4A
					MGP
					MGST2
					MIA
					MICAL1
					MICAL3
					MID1
					MIEF1
					MINK1
					MIPOL1
					MIR3681HG
					MIS18A
					MLKL
					MLLT10
					MLXIP
					MMAA
					MMAB
					MME
					MMP19
					MMP9
					MN1
					MOAP1
					MOB3B
					MOCOS
					MON1A
					MOV10
					MOXD1
					MPC2
					MPHOSPH10
					MPND
					MPP1
					MPRIP
					MPZL1
					MPZL2
					MPZL3
					MR1
					MRAP
					MRAP2
					MREG
					MRPL12
					MRPL15
					MRPL17
					MRPL20
					MRPL21
					MRPL24
					MRPL27
					MRPL37
					MRPL42
					MRPL46
					MRPL50
					MRPL55
					MRPL57
					MRPS11
					MRPS12
					MRPS14
					MRPS16
					MRPS18A
					MRPS25
					MRPS28
					MRPS30
					MRPS7
					MRS2
					MRTO4
					MSH2
					MSI2
					MSRB2
					MSRB3
					MST1
					MSTO1
					MTBP
					MTCH2
					MTFR1
					MTG2
					MTHFD1L
					MTHFD2L
					MTPAP
					MTR
					MTUS1
					MTX1
					MXD4
					MYADM
					MYBBP1A
					MYBL1
					MYL12A
					MYO10
					MYO19
					MYO1D
					MYO5B
					MYO6
					N4BP2L1
					NAA10
					NACAD
					NADK
					NAF1
					NAIP
					NAPRT
					NARF
					NAT1
					NAT10
					NATD1
					NBPF1
					NBPF3
					NBR2
					NCAPD3
					NCAPG
					NCAPH
					NCOA6
					NDC80
					NDNF
					NDRG4
					NDST1
					NDUFA1
					NDUFA10
					NDUFA3
					NDUFA6
					NDUFAF3
					NDUFAF4
					NDUFB11
					NDUFB7
					NDUFS3
					NDUFS7
					NEFM
					NEGR1
					NEK11
					NEK9
					NENF
					NETO2
					NF2
					NFASC
					NFATC4
					NFE2L3
					NFIB
					NFKBIA
					NFKBIB
					NFKBIZ
					NFRKB
					NFYC
					NGFR
					NHP2
					NID1
					NIN
					NINL
					NIPA1
					NIPSNAP3B
					NKIRAS2
					NKRF
					NKX2-1
					NLRP11
					NME1
					NMNAT2
					NMRK1
					NMT1
					NOC2L
					NOC4L
					NOCT
					NOL11
					NOL12
					NOL3
					NOL7
					NOL8
					NOL9
					NOLC1
					NOMO3
					NOP16
					NOP58
					NOP9
					NPAS2
					NPC1
					NPNT
					NPR2
					NPRL3
					NPTX2
					NPY1R
					NPY5R
					NR2E1
					NR2F2
					NR4A2
					NR5A2
					NRAS
					NRF1
					NRG1
					NRG2
					NRK
					NSF
					NSRP1
					NSUN6
					NT5DC1
					NTMT1
					NTN1
					NTNG1
					NUBPL
					NUDCD1
					NUDT19
					NUDT3
					NUDT5
					NUDT6
					NUDT9P1
					NUF2
					NUFIP1
					NUP155
					NUP188
					NUP210
					NUP214
					NUP43
					NUP62
					NUP62CL
					NUP98
					NUPR1
					NUTF2
					NVL
					NXPE3
					OCLM
					OCLN
					ODF2L
					OGFOD3
					OGFRL1
					OLFM2
					OLIG2
					ONECUT2
					OPTN
					OR2L13
					ORAI3
					ORAOV1
					ORC4
					ORC5
					OSBPL10
					OSBPL2
					OSBPL8
					OSCAR
					OSCP1
					OTUB2
					OTUD4
					OVGP1
					P4HA1
					PA2G4P2
					PACRGL
					PACSIN2
					PAK1IP1
					PAK2
					PAM16
					PAN2
					PAOX
					PAPLN
					PAPOLA
					PAPOLG
					PAQR3
					PAQR8
					PARM1
					PARP1
					PARP14
					PARP9
					PARVG
					PASD1
					PAWR
					PAX1
					PAX7
					PBK
					PC
					PCDH10
					PCDHB10
					PCED1A
					PCGF3
					PCOLCE
					PCSK5
					PDAP1
					PDE11A
					PDE3A
					PDE4DIP
					PDE5A
					PDE6D
					PDE7A
					PDE8B
					PDE9A
					PDGFRA
					PDLIM5
					PDPN
					PDS5B
					PDSS1
					PDZRN3
					PEA15
					PES1
					PEX14
					PFKFB2
					PFKFB4
					PFKP
					PGF
					PGM2
					PGP
					PGPEP1
					PHACTR2
					PHAX
					PHF10
					PHF11
					PHF5A
					PHGDH
					PHTF2
					PIGF
					PIGG
					PIGK
					PIGL
					PIGP
					PIGZ
					PIK3C3
					PIK3CG
					PIK3IP1
					PINLYP
					PINX1
					PIP4K2A
					PIP5K1B
					PIRC66
					PITHD1
					PITRM1
					PITX1
					PKMYT1
					PKP2
					PLA2G16
					PLA2G4C
					PLA2G5
					PLA2G7
					PLCG1
					PLCG2
					PLCL1
					PLCXD2
					PLD1
					PLEC
					PLEK2
					PLEKHA7
					PLEKHG1
					PLEKHH1
					PLEKHH2
					PLK3
					PLLP
					PLOD3
					PLTP
					PLXDC2
					PLXNA2
					PLXNA4
					PMAIP1
					PMS1
					PMVK
					PNMA1
					PNMA6A
					PNMAL1
					PNO1
					PNPLA6
					PNPT1
					PODXL
					POFUT1
					POLD1
					POLDIP3
					POLQ
					POLR1A
					POLR2D
					POLR2F
					POLR3A
					POLR3D
					POLR3H
					POM121L9P
					POP1
					POP4
					POP7
					POU3F2
					PPA2
					PPAN
					PPARA
					PPARD
					PPARGC1A
					PPARGC1B
					PPIE
					PPM1A
					PPM1K
					PPM1L
					PPP1R12A
					PPP1R1A
					PPP2R2A
					PPP2R3C
					PPP2R5C
					PPP2R5E
					PPP3CA
					PPP4R1L
					PPRC1
					PRADC1
					PRC1
					PRCC
					PRCD
					PRDM16
					PRDM5
					PRELID1
					PREP
					PREX2
					PRKAA2
					PRKACB
					PRKCE
					PRKCH
					PRKD1
					PRKG1
					PRMT1
					PRMT2
					PRO2958
					PROM1
					PROS1
					PROSER2
					PROX1
					PROX2
					PRPF18
					PRPF19
					PRPF31
					PRPF38A
					PRPF4
					PRPF40A
					PRPS1
					PRR11
					PRR14L
					PRR16
					PRR18
					PRR5L
					PRRC2C
					PRRX1
					PRRX2
					PRSS23
					PSEN1
					PSIP1
					PSMA5
					PSMB3
					PSMC3IP
					PSMC4
					PSMD1
					PSMD12
					PSMD3
					PSME3
					PSMG2
					PSPC1
					PSTPIP2
					PTBP1
					PTGES
					PTGFRN
					PTGR1
					PTGS1
					PTK2
					PTK6
					PTPN14
					PTPN2
					PTPRG
					PTPRN2
					PTPRO
					PTPRZ1
					PTRF
					PTTG3P
					PUF60
					PUM3
					PURA
					PUSL1
					PVR
					PVT1
					PWAR6
					PWWP2A
					PYCR2
					PYCRL
					PYGB
					PYGL
					PYROXD1
					PYROXD2
					QPCT
					QPRT
					QTRT1
					R3HCC1
					RAB11FIP4
					RAB15
					RAB27A
					RAB2A
					RAB3C
					RAB3GAP2
					RAB3IP
					RAB4A
					RAB6B
					RABEPK
					RAD18
					RAD51B
					RAD54B
					RAI14
					RALGAPA1
					RALGAPA2
					RAMP1
					RAMP2
					RANBP17
					RANGAP1
					RAP1A
					RAP1GDS1
					RARS
					RASA2
					RASAL2
					RASD1
					RASGRF2
					RASL11B
					RASSF2
					RBFA
					RBFOX2
					RBL1
					RBM10
					RBM12B
					RBM17
					RBM24
					RBM26
					RBM27
					RBM28
					RBM33
					RBM34
					RBMS3
					RBP4
					RBP7
					RBPMS
					RBX1
					RC3H2
					RCAN1
					RCC1
					RDH11
					RDH13
					RECQL4
					REEP4
					REG4
					REPS2
					RET
					RFC3
					RFPL3
					RGAG1
					RGL1
					RGL2
					RGL3
					RGP1
					RGS12
					RGS20
					RGS3
					RGS5
					RGS9
					RHBDD1
					RHOF
					RIMKLA
					RIOK1
					RIOK2
					RNASE4
					RNASEH1
					RNASEH2A
					RNASEH2C
					RNF112
					RNF128
					RNF130
					RNF141
					RNF144A
					RNF150
					RNF152
					RNF180
					RNF207
					RNF212B
					RNF213
					RNF217
					RNF219
					RNF32
					RNF38
					RNF40
					RNF6
					RNFT2
					RNGTT
					RNPC3
					RNPS1
					ROBO2
					ROR2
					RP9
					RPF2
					RPH3AL
					RPL13
					RPL26L1
					RPL28
					RPP30
					RPP38
					RPP40
					RPRD1A
					RPS15A
					RPS19BP1
					RPS29
					RPS6KA2
					RQCD1
					RRAGA
					RRAS2
					RRM1
					RRN3P2
					RRN3P3
					RRP12
					RRP15
					RRP7A
					RRP8
					RRP9
					RRS1
					RSBN1
					RSBN1L
					RSL1D1
					RSPH9
					RSU1
					RTN1
					RTTN
					RUBCN
					RUFY2
					RUVBL2
					RWDD2A
					S100A4
					S1PR3
					SAE1
					SALL3
					SALL4
[truncated: 707 more rows]

## Sheet: aKG Rescue Effect
Probe Set ID	Transcript ID (Array Design)	Entrez Gene	Gene Symbol	Gene Title	aKG Effect w.r.t rho(0CTL)/rho(+)rho	log2FC rho(0CTL)/rho(+)	Fold-Change rho(0CTL)/rho(+)	p.value (Rho+ vs Rho0_Ctl)	FDR (Rho+ vs Rho0_Ctl)	log2FC rho(0αKG)/rho(+)	Fold-Change rho(0αKG)/rho(+)	p.value (Rho+ vs Rho0_KG)	FDR (Rho+ vs Rho0_KG)	log2FC rho(0αKG)/rho(0CTL)	Fold-Change rho(0αKG)/rho(0CTL)	p.value (Rho0_KG vs Rho0_Ctl)	FDR (Rho0_KG vs Rho0_Ctl)	Probe Set ID	18911_Rho+ Detection Call	18912_Rho+ Detection Call	18913_Rho+ Detection Call	18914_Rho0_Ctl Detection Call	18915_Rho0_Ctl Detection Call	18916_Rho0_Ctl Detection Call	18917_Rho0+alpha_KG Detection Call	18918_Rho0+alpha_KG Detection Call	18919_Rho0+alpha_KG Detection Call	Probe Set ID	18911_Rho+ RMA	18912_Rho+ RMA	18913_Rho+ RMA	18914_Rho0_Ctl RMA	18915_Rho0_Ctl RMA	18916_Rho0_Ctl RMA	18917_Rho0+alpha_KG RMA	18918_Rho0+alpha_KG RMA	18919_Rho0+alpha_KG RMA
206569_at	g5803085	11009	IL24	interleukin 24	Dampen: FDR p>0.05, |FC|>1.55 for rho(0αKG)/rho(0CTL)	3.94	15.3482	1e-05	0.001082	2.957	7.76508	8e-05	0.002768	-0.983	-1.97657	0.04948	0.361613	206569_at	P	P	P	P	P	P	P	P	P	206569_at	6.83811	6.1068	5.46562	10.5077	10.4916	9.23047	8.63853	9.13439	9.50912
1552445_a_at	Hs2.223782.1	80712	ESX1	ESX homeobox 1	Dampen: FDR p>0.05, |FC|>1.55 for rho(0αKG)/rho(0CTL)	3.495	11.2746	0	0.000608	2.602	6.07128	3e-05	0.001463	-0.892	-1.85575	0.0248	0.269126	1552445_a_at	P	P	P	P	P	P	P	P	P	1552445_a_at	4.86322	5.55034	6.25023	8.62369	9.48325	9.04066	8.25436	8.03448	8.18151
204337_at	Hs.227571.0	5999	RGS4	regulator of G-protein signaling 4	Dampen: FDR p>0.05, |FC|>1.55 for rho(0αKG)/rho(0CTL)	3.409	10.6221	8e-05	0.004068	2.641	6.23764	0.00052	0.008907	-0.769	-1.70409	0.15919	0.567252	204337_at	P	P	P	P	P	P	P	P	P	204337_at	6.60126	6.5957	4.75199	9.62366	9.90657	8.64655	8.79482	8.70782	8.36843
1558930_at	Hs2.399747.1	728192	LINC00460	long intergenic non-protein coding RNA 460	Dampen: FDR p>0.05, |FC|>1.55 for rho(0αKG)/rho(0CTL)	3.233	9.40221	0.00012	0.005254	2.472	5.54812	0.00085	0.012177	-0.761	-1.69466	0.16539	0.575005	1558930_at	A	P	A	P	P	P	P	P	P	1558930_at	5.27231	7.27266	4.96021	9.12405	8.80869	9.27138	8.16514	8.39171	8.36508
237732_at	Hs.135098.0	574414	PRR9	proline rich 9	Dampen: FDR p>0.05, |FC|>1.55 for rho(0αKG)/rho(0CTL)	2.783	6.88282	6e-05	0.003513	2.079	4.22514	0.00053	0.009119	-0.704	-1.62902	0.10944	0.496928	237732_at	A	P	P	P	P	P	P	P	P	237732_at	4.3061	4.8759	5.29016	6.87016	7.50672	8.44496	6.57229	7.26968	6.86853
1558152_at	Hs2.378970.1	100131262	LOC100131262	uncharacterized LOC100131262	Dampen: FDR p>0.05, |FC|>1.55 for rho(0αKG)/rho(0CTL)	2.71	6.54322	0.0011	0.018203	1.866	3.64521	0.01006	0.059719	-0.844	-1.79502	0.17574	0.588064	1558152_at	P	P	P	P	P	P	P	P	P	1558152_at	9.33212	7.06225	8.97567	11.6523	11.6089	10.2396	10.4531	10.1614	10.3534
1553311_at	Hs2.171076.1	284756	C20orf197	chromosome 20 open reading frame 197	Dampen: FDR p>0.05, |FC|>1.55 for rho(0αKG)/rho(0CTL)	2.693	6.46657	0	0.000501	1.645	3.12748	9e-05	0.002958	-1.048	-2.06766	0.00203	0.08394	1553311_at	P	P	P	P	P	P	P	P	P	1553311_at	3.72052	3.83909	3.01186	6.1818	5.88184	6.58663	5.12304	5.30716	5.07529
235573_at	Hs.201615.0	10808	HSPH1	heat shock 105kDa/110kDa protein 1	Dampen: FDR p>0.05, |FC|>1.55 for rho(0αKG)/rho(0CTL)	2.205	4.61075	4e-05	0.002516	1.485	2.79917	0.00067	0.010571	-0.719	-1.64604	0.03615	0.318671	235573_at	P	P	P	P	P	P	P	P	P	235573_at	6.9327	7.18946	7.94096	9.69014	9.54302	9.44359	9.23685	8.96506	8.31651
1554110_at	Hs2.146170.2	64866	CDCP1	CUB domain containing protein 1	Dampen: FDR p>0.05, |FC|>1.55 for rho(0αKG)/rho(0CTL)	2.052	4.1468	0.00081	0.015158	1.254	2.38502	0.01455	0.075635	-0.799	-1.73989	0.08676	0.453975	1554110_at	P	P	A	P	P	P	P	P	P	1554110_at	7.09289	7.24526	6.12206	8.79301	8.06233	9.76229	8.06233	8.09733	8.06233
220265_at	g13470087	57720	GPR107	G protein-coupled receptor 107	Dampen: FDR p>0.05, |FC|>1.55 for rho(0αKG)/rho(0CTL)	2.039	4.10961	0.00011	0.004852	1.389	2.61897	0.00159	0.01831	-0.65	-1.56917	0.06682	0.408625	220265_at	P	P	P	P	P	P	P	P	P	220265_at	7.22899	6.18706	6.35591	9.02321	8.8356	8.02926	7.97583	7.97583	7.98783
243059_at	Hs.148676.0	400550	FENDRR	FOXF1 adjacent non-coding developmental regulatory RNA	Dampen: FDR p>0.05, |FC|>1.55 for rho(0αKG)/rho(0CTL)	2.029	4.08122	0.00035	0.009428	0.901	1.86736	0.03552	0.135303	-1.129	-2.18707	0.01281	0.201323	243059_at	P	P	P	P	P	P	P	P	P	243059_at	6.84875	6.19114	7.89136	9.29965	8.72231	8.9976	7.7721	7.86144	7.99968
235029_at	Hs.293545.0	84296	GINS4	GINS complex subunit 4 (Sld5 homolog)	Dampen: FDR p>0.05, |FC|>1.55 for rho(0αKG)/rho(0CTL)	2.029	4.08122	1e-05	0.001047	1.067	2.09507	0.00096	0.013076	-0.962	-1.94801	0.00188	0.082154	235029_at	P	P	P	P	P	P	P	P	P	235029_at	6.27509	5.56466	6.37938	8.32739	8.17037	7.80919	7.18803	7.12093	7.11169
242332_at	Hs.49776.0	400550	FENDRR	FOXF1 adjacent non-coding developmental regulatory RNA	Dampen: FDR p>0.05, |FC|>1.55 for rho(0αKG)/rho(0CTL)	1.916	3.77375	0.00022	0.007256	0.828	1.77522	0.03056	0.122599	-1.088	-2.12579	0.00828	0.164837	242332_at	P	A	P	P	P	P	P	P	P	242332_at	7.80046	7.39873	8.87335	10.0882	10.0234	9.70835	8.76802	8.78454	9.00272
204603_at	g4504368	9156	EXO1	exonuclease 1	Dampen: FDR p>0.05, |FC|>1.55 for rho(0αKG)/rho(0CTL)	1.884	3.69097	0.00035	0.009391	0.925	1.89868	0.02299	0.101835	-0.959	-1.94396	0.01954	0.242799	204603_at	P	P	P	P	P	P	P	P	P	204603_at	8.45671	7.43715	8.82271	10.3854	10.3561	9.62667	9.25625	9.10893	9.12673
211597_s_at	g13560280	84525	HOPX	HOP homeobox	Dampen: FDR p>0.05, |FC|>1.55 for rho(0αKG)/rho(0CTL)	1.874	3.66547	0.00502	0.045358	1.06	2.08493	0.06652	0.20256	-0.814	-1.75808	0.14345	0.546165	211597_s_at	P	P	A	P	P	P	P	P	P	211597_s_at	7.39915	6.00809	5.60554	7.73074	7.67739	9.22714	7.43097	7.26964	7.4925
228069_at	Hs.121536.0	113115	MTFR2	mitochondrial fission regulator 2	Dampen: FDR p>0.05, |FC|>1.55 for rho(0αKG)/rho(0CTL)	1.824	3.54062	4e-05	0.002702	0.955	1.93858	0.00371	0.031586	-0.868	-1.82513	0.0064	0.146891	228069_at	P	P	P	P	P	P	P	P	P	228069_at	8.2603	7.35739	8.32362	9.99	9.85572	9.56691	8.98101	8.98101	8.84526
1554618_at	Hs2.278502.2	3268	AGFG2	ArfGAP with FG repeats 2	Dampen: FDR p>0.05, |FC|>1.55 for rho(0αKG)/rho(0CTL)	1.813	3.51372	0.0013	0.019832	1.035	2.04911	0.02759	0.114553	-0.778	-1.71475	0.07963	0.439275	1554618_at	A	A	A	P	P	P	P	P	P	1554618_at	6.28208	6.20606	6.4079	9.08687	8.11133	7.13681	7.18402	7.34002	7.47562
218585_s_at	g7705575	51514	DTL	denticleless E3 ubiquitin protein ligase homolog (Drosophila)	Dampen: FDR p>0.05, |FC|>1.55 for rho(0αKG)/rho(0CTL)	1.785	3.44618	0.00158	0.022529	0.954	1.93724	0.04094	0.14844	-0.831	-1.77892	0.06743	0.410257	218585_s_at	P	P	P	P	P	P	P	P	P	218585_s_at	8.7084	7.70787	9.53678	10.455	10.771	10.081	9.82967	9.62405	9.35985
1554131_at	Hs2.81897.2	54462	CCSER2	coiled-coil serine rich protein 2	Dampen: FDR p>0.05, |FC|>1.55 for rho(0αKG)/rho(0CTL)	1.761	3.38933	0.00233	0.028425	0.751	1.68296	0.10701	0.272515	-1.01	-2.01391	0.03949	0.330504	1554131_at	P	P	P	P	P	P	P	P	P	1554131_at	4.4229	5.69161	5.03983	6.10277	6.58861	7.74475	5.85262	5.85262	5.70216
234945_at	Hs.121536.1	113115	MTFR2	mitochondrial fission regulator 2	Dampen: FDR p>0.05, |FC|>1.55 for rho(0αKG)/rho(0CTL)	1.747	3.3566	5e-05	0.003179	0.98	1.97247	0.00301	0.027536	-0.767	-1.70173	0.01172	0.193304	234945_at	P	P	P	P	P	P	P	P	P	234945_at	5.1524	4.13848	5.08283	6.58551	6.57128	6.45895	5.68572	5.73533	5.89243
206299_at	g7662670	27112	FAM155B	family with sequence similarity 155, member B	Dampen: FDR p>0.05, |FC|>1.55 for rho(0αKG)/rho(0CTL)	1.724	3.30351	0.00063	0.013222	0.992	1.98894	0.01636	0.081622	-0.732	-1.66094	0.0579	0.385102	206299_at	P	A	P	P	P	P	P	P	P	206299_at	6.62944	6.92012	7.88382	8.87872	9.30844	8.4169	8.36985	7.84572	8.19382
1554261_at	Hs2.348392.1	114818	KLHL29	kelch-like family member 29	Dampen: FDR p>0.05, |FC|>1.55 for rho(0αKG)/rho(0CTL)	1.721	3.29665	1e-05	0.000996	0.978	1.96973	0.00052	0.008907	-0.743	-1.67365	0.00311	0.104356	1554261_at	P	P	P	P	P	P	P	P	P	1554261_at	5.98557	5.83869	5.43228	7.67336	7.35054	7.39587	6.46254	6.92618	6.80237
1554012_at	Hs2.209569.1	340419	RSPO2	R-spondin 2	Dampen: FDR p>0.05, |FC|>1.55 for rho(0αKG)/rho(0CTL)	1.721	3.29665	7e-05	0.003686	1.005	2.00694	0.00284	0.026501	-0.716	-1.64262	0.01784	0.233814	1554012_at	P	A	A	P	P	P	A	P	P	1554012_at	4.08065	3.80603	4.38421	6.01304	6.13945	5.28128	4.87028	5.32642	5.09035
211767_at	g13543688	84296	GINS4	GINS complex subunit 4 (Sld5 homolog)	Dampen: FDR p>0.05, |FC|>1.55 for rho(0αKG)/rho(0CTL)	1.719	3.29208	0.00069	0.013876	0.758	1.69114	0.05275	0.17476	-0.961	-1.94666	0.0199	0.244953	211767_at	P	P	P	P	P	P	P	P	P	211767_at	7.77128	6.6813	7.34897	9.19851	8.89354	8.86611	8.38105	8.38135	7.31362
215303_at	Hs.159412.0	9201	DCLK1	doublecortin-like kinase 1	Narrow: FDR p<0.05, |FC|>1.55 for rho(0αKG)/rho(0CTL)	1.715	3.28297	3e-05	0.002486	0.284	1.21757	0.24169	0.44758	-1.431	-2.69634	0.00014	0.027065	215303_at	P	P	P	P	P	P	P	P	M	215303_at	4.30945	4.34179	3.99898	5.61748	6.18157	5.99484	4.88575	4.5384	4.07672
1555324_at	Hs2Affx.1.195	5754	PTK7	protein tyrosine kinase 7 (inactive)	Dampen: FDR p>0.05, |FC|>1.55 for rho(0αKG)/rho(0CTL)	1.7	3.24901	0.00336	0.035474	0.826	1.77276	0.08709	0.23928	-0.874	-1.83274	0.07262	0.423516	1555324_at	P	A	P	P	P	P	P	P	A	1555324_at	6.4601	5.21144	5.1524	7.55803	7.76725	6.59777	6.40153	6.94606	5.95299
1557386_at	Hs2.234571.1	100507600	LOC100507600	uncharacterized LOC100507600	Dampen: FDR p>0.05, |FC|>1.55 for rho(0αKG)/rho(0CTL)	1.693	3.23328	0.0043	0.041397	0.582	1.49692	0.22517	0.429643	-1.111	-2.15995	0.03456	0.311102	1557386_at	A	A	A	P	P	P	A	P	P	1557386_at	5.41967	5.25237	4.91113	7.51762	7.51283	5.63217	5.5842	5.93009	5.81386
219281_at	g13259538	4482	MSRA	methionine sulfoxide reductase A	Dampen: FDR p>0.05, |FC|>1.55 for rho(0αKG)/rho(0CTL)	1.677	3.19762	0.00013	0.00527	0.999	1.99861	0.00414	0.033884	-0.679	-1.60103	0.0291	0.289037	219281_at	P	P	P	P	P	P	P	P	P	219281_at	8.99664	9.30176	10.1732	11.2051	11.041	11.2576	10.3783	10.4764	10.6128
234944_s_at	Hs.121536.1	113115	MTFR2	mitochondrial fission regulator 2	Dampen: FDR p>0.05, |FC|>1.55 for rho(0αKG)/rho(0CTL)	1.669	3.17994	4e-05	0.002831	0.826	1.77276	0.00548	0.040529	-0.843	-1.79378	0.00485	0.129167	234944_s_at	P	P	P	P	P	P	P	P	P	234944_s_at	7.48419	6.98316	7.83075	9.36144	9.14458	8.79914	8.18802	8.43598	8.15072
205935_at	g4503732	2294	FOXF1	forkhead box F1	Dampen: FDR p>0.05, |FC|>1.55 for rho(0αKG)/rho(0CTL)	1.668	3.17774	3e-05	0.002136	0.83	1.77769	0.00361	0.030997	-0.838	-1.78757	0.0034	0.108657	205935_at	P	P	P	P	P	P	P	P	P	205935_at	9.13278	9.25515	9.9998	11.0935	11.0685	11.229	10.2699	10.4232	10.1837
222680_s_at	Hs.126774.0	51514	DTL	denticleless E3 ubiquitin protein ligase homolog (Drosophila)	Dampen: FDR p>0.05, |FC|>1.55 for rho(0αKG)/rho(0CTL)	1.66	3.16017	0.00031	0.008709	0.834	1.78262	0.01926	0.090832	-0.826	-1.77276	0.02004	0.245967	222680_s_at	P	P	P	P	P	P	P	P	P	222680_s_at	8.16084	7.22545	8.20741	9.56873	9.75109	9.25417	9.01205	8.80928	8.27321
212407_at	Hs.19469.0	51603	METTL13	methyltransferase like 13	Dampen: FDR p>0.05, |FC|>1.55 for rho(0αKG)/rho(0CTL)	1.652	3.14269	0.00093	0.016458	0.567	1.48144	0.13076	0.30819	-1.085	-2.12138	0.01124	0.189546	212407_at	P	P	P	P	P	P	P	P	P	212407_at	8.90156	8.84714	9.45116	11.0693	11.2219	9.86487	9.74823	9.35856	9.79515
239178_at	Hs.197018.0	2254	FGF9	fibroblast growth factor 9	Narrow: FDR p<0.05, |FC|>1.55 for rho(0αKG)/rho(0CTL)	1.645	3.12748	5e-05	0.003222	-0.536	-1.44995	0.04477	0.157114	-2.181	-4.53468	1e-05	0.007041	239178_at	P	P	P	P	P	P	P	P	P	239178_at	4.87293	5.20143	5.2657	6.42779	6.55677	7.29173	4.51672	4.43432	4.78137
236219_at	Hs.134069.0	159371	SLC35G1	solute carrier family 35, member G1	Dampen: FDR p>0.05, |FC|>1.55 for rho(0αKG)/rho(0CTL)	1.641	3.11882	0.00039	0.010032	0.884	1.84548	0.01603	0.080551	-0.757	-1.68997	0.03205	0.301517	236219_at	P	P	P	P	P	P	P	P	P	236219_at	6.18454	6.64925	7.27103	8.4069	8.75695	7.8648	7.49972	7.44349	7.81385
227354_at	Hs.13256.0	55824	PAG1	phosphoprotein membrane anchor with glycosphingolipid microdomains 1	Dampen: FDR p>0.05, |FC|>1.55 for rho(0αKG)/rho(0CTL)	1.633	3.10157	0.00444	0.042178	0.779	1.71594	0.10562	0.270277	-0.854	-1.80751	0.08022	0.440365	227354_at	P	P	P	P	P	P	P	P	P	227354_at	5.65259	6.29174	5.4606	7.97841	8.00362	6.32332	6.89888	6.51433	6.32988
238919_at	Hs.24886.0	5101	PCDH9	protocadherin 9	Dampen: FDR p>0.05, |FC|>1.55 for rho(0αKG)/rho(0CTL)	1.626	3.08656	9e-05	0.004234	0.525	1.43893	0.05777	0.185155	-1.102	-2.14652	0.00137	0.070904	238919_at	P	P	P	P	P	P	P	P	P	238919_at	4.09797	4.66394	4.51148	6.30328	5.48185	6.36641	4.91256	4.96721	4.96721
209279_s_at	g12652968	50814	NSDHL	NAD(P) dependent steroid dehydrogenase-like	Dampen: FDR p>0.05, |FC|>1.55 for rho(0αKG)/rho(0CTL)	1.6	3.03143	2e-05	0.001659	0.889	1.85189	0.00132	0.016153	-0.712	-1.63807	0.00515	0.133569	209279_s_at	P	P	P	P	P	P	P	P	P	209279_s_at	7.67322	7.11092	7.05495	9.09677	8.96477	8.57891	8.17584	8.12216	8.20785
236957_at	Hs.117753.0	157313	CDCA2	cell division cycle associated 2	Narrow: FDR p<0.05, |FC|>1.55 for rho(0αKG)/rho(0CTL)	1.564	2.95672	0.00013	0.005427	0.24	1.18099	0.35508	0.563252	-1.324	-2.50359	0.00045	0.043497	236957_at	P	P	P	P	P	P	P	P	P	236957_at	8.76437	8.35859	7.92546	9.71485	9.84728	10.1783	8.85762	8.69802	8.21232
241252_at	Hs.99480.1	157570	ESCO2	establishment of sister chromatid cohesion N-acetyltransferase 2	Dampen: FDR p>0.05, |FC|>1.55 for rho(0αKG)/rho(0CTL)	1.557	2.94241	0.0008	0.015031	0.891	1.85446	0.01963	0.091927	-0.665	-1.58557	0.06343	0.399756	241252_at	P	A	P	P	P	P	P	P	P	241252_at	3.31351	2.95292	3.3421	4.52523	5.5578	4.19524	3.91532	4.01831	4.34825
1554536_at	Hs2.1602.2	1806	DPYD	dihydropyrimidine dehydrogenase	Dampen: FDR p>0.05, |FC|>1.55 for rho(0αKG)/rho(0CTL)	1.55	2.92817	1e-05	0.001114	0.9	1.86607	0.00053	0.009055	-0.651	-1.57026	0.00424	0.120739	1554536_at	P	P	P	P	P	P	P	P	P	1554536_at	5.04325	4.7523	5.14022	6.58171	6.26659	6.73809	5.93357	5.66266	6.0384
243372_at	Hs.259742.0	3329	HSPD1	heat shock 60kDa protein 1 (chaperonin)	Dampen: FDR p>0.05, |FC|>1.55 for rho(0αKG)/rho(0CTL)	1.527	2.88186	0.00084	0.015487	0.624	1.54114	0.07548	0.219394	-0.902	-1.86865	0.0175	0.23183	243372_at	P	P	P	P	P	P	P	P	P	243372_at	8.46909	7.26024	7.35239	9.42511	9.33484	8.90191	8.49753	8.40932	8.04752
218755_at	g5032012	10112	KIF20A	kinesin family member 20A	Dampen: FDR p>0.05, |FC|>1.55 for rho(0αKG)/rho(0CTL)	1.524	2.87587	0.00045	0.010765	0.686	1.60882	0.03857	0.14287	-0.838	-1.78757	0.016	0.223034	218755_at	P	P	P	P	P	P	P	P	P	218755_at	9.35326	9.00173	8.61009	10.3526	10.1781	11.0064	10.0065	9.76558	9.25023
211124_s_at	g4530470	4254	KITLG	KIT ligand	Dampen: FDR p>0.05, |FC|>1.55 for rho(0αKG)/rho(0CTL)	1.519	2.86592	0.00468	0.043664	0.642	1.56049	0.14919	0.33479	-0.878	-1.83783	0.05934	0.389219	211124_s_at	P	P	P	P	P	P	P	P	P	211124_s_at	6.57522	6.2894	6.51785	8.6694	8.45371	6.81645	7.08235	7.08126	7.1434
204178_s_at	g5454063	10432	RBM14	RNA binding motif protein 14	Dampen: FDR p>0.05, |FC|>1.55 for rho(0αKG)/rho(0CTL)	1.515	2.85799	0.0002	0.006875	0.33	1.25701	0.22244	0.426617	-1.185	-2.27363	0.00112	0.064818	204178_s_at	P	P	P	P	P	P	P	P	P	204178_s_at	9.52058	9.30979	9.08541	11.057	11.201	10.2027	9.59365	9.49694	9.81516
232184_at	Hs.149391.0	57679	ALS2	ALS2, alsin Rho guanine nucleotide exchange factor	Dampen: FDR p>0.05, |FC|>1.55 for rho(0αKG)/rho(0CTL)	1.508	2.84415	1e-05	0.001272	0.757	1.68997	0.00171	0.019189	-0.751	-1.68296	0.0018	0.080371	232184_at	P	P	P	P	P	P	P	P	P	232184_at	7.03787	7.20482	6.86394	8.43811	8.8092	8.38422	7.78451	8.03091	7.5631
1563899_at	Hs2.379337.1	197021	LCTL	lactase-like	Dampen: FDR p>0.05, |FC|>1.55 for rho(0αKG)/rho(0CTL)	1.504	2.83628	0.0019	0.025143	0.839	1.78881	0.03878	0.143335	-0.665	-1.58557	0.08734	0.455425	1563899_at	P	P	P	P	P	P	P	P	P	1563899_at	5.79658	4.41968	5.0581	6.28346	6.44884	7.05413	5.78096	6.30734	5.70216
210614_at	g726181	7274	TTPA	tocopherol (alpha) transfer protein	Narrow: FDR p<0.05, |FC|>1.55 for rho(0αKG)/rho(0CTL)	1.499	2.82647	9e-05	0.00449	0.256	1.19416	0.28505	0.494416	-1.243	-2.3669	0.00037	0.039874	210614_at	A	A	P	P	P	P	M	P	A	210614_at	5.80471	5.81386	6.38091	7.75762	7.29145	7.44637	5.86702	6.48131	6.41861
235428_at	Hs.104480.0	100507316	MINCR	MYC-induced long noncoding RNA	Dampen: FDR p>0.05, |FC|>1.55 for rho(0αKG)/rho(0CTL)	1.489	2.80694	0.00199	0.025857	0.531	1.44493	0.15934	0.348848	-0.958	-1.94261	0.02179	0.25394	235428_at	P	P	P	P	P	P	P	P	P	235428_at	7.24553	7.75913	6.55937	8.43412	8.27511	9.32118	7.43127	7.82933	7.89541
205609_at	g4502086	284	ANGPT1	angiopoietin 1	Dampen: FDR p>0.05, |FC|>1.55 for rho(0αKG)/rho(0CTL)	1.483	2.79529	0.00183	0.024607	0.803	1.74473	0.04242	0.151724	-0.679	-1.60103	0.07673	0.432662	205609_at	A	A	P	P	P	P	P	P	P	205609_at	4.32826	3.74965	4.66846	6.27803	5.96741	4.94861	4.97196	5.19777	4.98626
205217_at	g6138974	1678	TIMM8A	translocase of inner mitochondrial membrane 8 homolog A (yeast)	Dampen: FDR p>0.05, |FC|>1.55 for rho(0αKG)/rho(0CTL)	1.481	2.79142	1e-05	0.000864	0.73	1.65864	0.00109	0.014264	-0.751	-1.68296	0.0009	0.058847	205217_at	P	P	P	P	P	P	P	P	P	205217_at	7.94686	8.05821	8.29172	9.63708	9.51857	9.58335	8.87038	9.05991	8.55588
226661_at	Hs.15091.0	157313	CDCA2	cell division cycle associated 2	Dampen: FDR p>0.05, |FC|>1.55 for rho(0αKG)/rho(0CTL)	1.441	2.71509	0.0003	0.008485	0.284	1.21757	0.2903	0.499708	-1.157	-2.22993	0.00133	0.070162	226661_at	P	P	P	P	P	P	P	P	P	226661_at	9.78606	9.31392	9.01021	10.6118	10.8058	11.015	10.0561	9.68145	9.22345
215779_s_at	Hs.247817.2	8339	HIST1H2BG	histone cluster 1, H2bg	Dampen: FDR p>0.05, |FC|>1.55 for rho(0αKG)/rho(0CTL)	1.412	2.66106	0.00241	0.029158	0.211	1.15749	0.54825	0.72477	-1.201	-2.29899	0.00624	0.145563	215779_s_at	P	P	P	P	P	P	P	P	P	215779_s_at	9.92356	8.74602	10.0714	10.7585	10.7405	11.4774	9.74302	9.86318	9.76777
235572_at	Hs.165190.0	147841	SPC24	SPC24, NDC80 kinetochore complex component	Dampen: FDR p>0.05, |FC|>1.55 for rho(0αKG)/rho(0CTL)	1.403	2.64451	0.00021	0.007014	0.571	1.48555	0.03753	0.140239	-0.832	-1.78015	0.00625	0.14558	235572_at	P	P	P	P	P	P	P	P	P	235572_at	7.9485	7.25202	8.12614	9.428	8.95732	9.15009	8.14564	8.35644	8.53842
1554027_a_at	Hs2.5462.2	8671	SLC4A4	solute carrier family 4 (sodium bicarbonate cotransporter), member 4	Dampen: FDR p>0.05, |FC|>1.55 for rho(0αKG)/rho(0CTL)	1.396	2.63171	0.00208	0.026521	0.437	1.35379	0.21333	0.415672	-0.959	-1.94396	0.01663	0.226971	1554027_a_at	P	P	P	P	P	P	P	P	P	1554027_a_at	4.81637	4.34159	4.81637	6.29105	6.56746	5.30528	4.85588	5.52799	4.90275
213984_at	Hs.31921.0	23244	PDS5A	PDS5 cohesin associated factor A	Dampen: FDR p>0.05, |FC|>1.55 for rho(0αKG)/rho(0CTL)	1.39	2.62079	6e-05	0.003344	0.661	1.58118	0.00813	0.052215	-0.728	-1.65634	0.00477	0.128037	213984_at	P	P	P	P	P	P	P	P	P	213984_at	6.0628	6.4604	6.26208	7.2878	7.59962	8.06712	6.88363	6.9027	6.98328
1557415_s_at	Hs2.369065.1	137994	LETM2	leucine zipper-EF-hand containing transmembrane protein 2	Narrow: FDR p<0.05, |FC|>1.55 for rho(0αKG)/rho(0CTL)	1.382	2.60629	0.00012	0.005151	-0.918	-1.88949	0.00203	0.021403	-2.3	-4.92458	0	0.005172	1557415_s_at	P	P	P	P	P	P	A	A	A	1557415_s_at	6.93694	6.28541	6.90385	7.72517	8.19077	8.35497	5.70836	5.85049	5.81229
200658_s_at	Hs.75323.0	5245	PHB	prohibitin	Dampen: FDR p>0.05, |FC|>1.55 for rho(0αKG)/rho(0CTL)	1.378	2.59908	0.00109	0.018134	0.742	1.67249	0.03157	0.125379	-0.636	-1.55401	0.0573	0.383245	200658_s_at	P	P	P	P	P	P	P	P	P	200658_s_at	10.9757	9.9222	9.70584	11.6133	11.4654	11.6589	10.7304	10.9757	11.1241
219798_s_at	g9624989	56257	MEPCE	methylphosphate capping enzyme	Dampen: FDR p>0.05, |FC|>1.55 for rho(0αKG)/rho(0CTL)	1.373	2.59009	0.00196	0.02563	0.652	1.57135	0.07075	0.210586	-0.721	-1.64832	0.04976	0.362733	219798_s_at	P	P	P	P	P	P	P	P	P	219798_s_at	7.86203	7.67817	7.93369	9.58311	9.67549	8.33501	8.40738	8.31577	8.70725
205085_at	g4758849	4998	ORC1	origin recognition complex subunit 1	Dampen: FDR p>0.05, |FC|>1.55 for rho(0αKG)/rho(0CTL)	1.37	2.58471	4e-05	0.002702	0.551	1.4651	0.01532	0.078217	-0.819	-1.76418	0.00165	0.076284	205085_at	P	A	A	P	P	P	P	P	A	205085_at	6.63196	6.34568	6.7795	8.2286	8.06029	7.57845	7.0937	7.0937	7.22421
240037_at	Hs.65009.0	150771	ITPRIPL1	inositol 1,4,5-trisphosphate receptor interacting protein-like 1	Dampen: FDR p>0.05, |FC|>1.55 for rho(0αKG)/rho(0CTL)	1.364	2.57398	0.00137	0.020533	0.715	1.64148	0.04057	0.147552	-0.649	-1.56808	0.05805	0.385695	240037_at	P	P	P	P	P	P	P	P	P	240037_at	7.0836	7.78942	7.5727	9.06056	9.34512	8.13199	8.13199	8.16869	8.28937
226132_s_at	Hs.7988.0	149175	MANEAL	mannosidase, endo-alpha-like	Dampen: FDR p>0.05, |FC|>1.55 for rho(0αKG)/rho(0CTL)	1.354	2.5562	0.00311	0.033922	0.715	1.64148	0.06363	0.19703	-0.639	-1.55725	0.0915	0.46408	226132_s_at	P	P	P	P	P	P	P	P	P	226132_s_at	8.62289	8.74456	9.15213	10.7207	10.5784	9.28386	9.62811	9.49247	9.54514
234744_x_at	Hs.307059.0	9585	KIF20B	kinesin family member 20B	Dampen: FDR p>0.05, |FC|>1.55 for rho(0αKG)/rho(0CTL)	1.34	2.53151	0.00024	0.007573	0.251	1.19003	0.30018	0.509909	-1.089	-2.12727	0.00102	0.062902	234744_x_at	A	A	A	P	A	P	A	A	A	234744_x_at	4.58384	4.15315	3.99507	5.66612	5.1715	5.91409	4.22831	4.62814	4.62814
221520_s_at	g12804484	55143	CDCA8	cell division cycle associated 8	Dampen: FDR p>0.05, |FC|>1.55 for rho(0αKG)/rho(0CTL)	1.339	2.52976	0.00027	0.007976	0.649	1.56808	0.0205	0.094651	-0.69	-1.61328	0.0154	0.21954	221520_s_at	P	P	P	P	P	P	P	P	P	221520_s_at	7.97137	6.97948	7.32883	8.7134	8.6491	8.9328	8.11633	8.20222	7.90804
233907_s_at	Hs.21068.3	56256	SERTAD4	SERTA domain containing 4	Dampen: FDR p>0.05, |FC|>1.55 for rho(0αKG)/rho(0CTL)	1.335	2.52275	0.00129	0.019832	0.64	1.55833	0.05487	0.179226	-0.695	-1.61888	0.04008	0.332575	233907_s_at	A	A	A	P	P	P	P	P	A	233907_s_at	5.57954	4.90221	5.53257	7.08559	6.94905	5.9849	6.00973	5.9849	5.93867
229332_at	Hs.162717.0	84842	HPDL	4-hydroxyphenylpyruvate dioxygenase-like	Dampen: FDR p>0.05, |FC|>1.55 for rho(0αKG)/rho(0CTL)	1.332	2.51751	0.00064	0.013332	0.012	1.00835	0.96409	0.981689	-1.32	-2.49666	0.00068	0.051894	229332_at	P	P	P	P	P	P	P	P	P	229332_at	8.23363	8.06775	8.30921	9.90538	9.85211	8.85035	8.27443	8.02805	8.34431
236481_at	Hs.18001.0	2184	FAH	fumarylacetoacetate hydrolase (fumarylacetoacetase)	Dampen: FDR p>0.05, |FC|>1.55 for rho(0αKG)/rho(0CTL)	1.328	2.51054	0.00029	0.008397	0.178	1.13131	0.46329	0.658288	-1.15	-2.21914	0.00079	0.05567	236481_at	P	P	P	P	P	P	P	P	M	236481_at	6.7025	6.05492	5.8831	7.51501	7.24363	7.86586	6.33221	6.29957	6.54221
238452_at	Hs.164495.0	127943	FCRLB	Fc receptor-like B	Dampen: FDR p>0.05, |FC|>1.55 for rho(0αKG)/rho(0CTL)	1.323	2.50186	0.0006	0.012806	0.504	1.41814	0.08114	0.22919	-0.819	-1.76418	0.01096	0.186945	238452_at	M	P	A	P	P	P	P	P	P	238452_at	6.12313	6.93585	6.45871	7.92208	8.02092	7.54298	6.69914	6.88499	7.44456
226936_at	Hs.35962.0	387103	CENPW	centromere protein W	Dampen: FDR p>0.05, |FC|>1.55 for rho(0αKG)/rho(0CTL)	1.316	2.48975	0.00075	0.014563	0.641	1.55941	0.03794	0.141272	-0.675	-1.5966	0.03068	0.296196	226936_at	P	P	P	P	P	P	P	P	P	226936_at	8.71395	9.07358	8.70339	9.88739	9.73013	10.8205	9.35127	9.47342	9.58852
201841_s_at	g4996892	3315	HSPB1	heat shock 27kDa protein 1	Dampen: FDR p>0.05, |FC|>1.55 for rho(0αKG)/rho(0CTL)	1.313	2.48458	0.00316	0.034273	0.647	1.56591	0.08049	0.228085	-0.665	-1.58557	0.07376	0.425935	201841_s_at	P	P	P	P	P	P	P	P	P	201841_s_at	10.7309	10.5453	9.96462	11.1323	11.5434	12.5032	11.0079	10.9937	11.1815
218619_s_at	g4507320	6839	SUV39H1	suppressor of variegation 3-9 homolog 1 (Drosophila)	Dampen: FDR p>0.05, |FC|>1.55 for rho(0αKG)/rho(0CTL)	1.302	2.4657	0.00093	0.016536	0.575	1.48968	0.06168	0.193161	-0.728	-1.65634	0.02435	0.267103	218619_s_at	P	P	P	P	P	P	P	P	P	218619_s_at	8.54828	7.32094	7.7732	9.26472	9.28922	8.99584	8.5502	8.31813	8.49818
240966_at	Hs.44567.0	79628	SH3TC2	SH3 domain and tetratricopeptide repeats 2	Dampen: FDR p>0.05, |FC|>1.55 for rho(0αKG)/rho(0CTL)	1.286	2.43851	0.00426	0.041213	-0.036	-1.02527	0.91682	0.95806	-1.322	-2.50012	0.00362	0.111272	240966_at	P	P	P	P	P	P	P	P	P	240966_at	8.04058	8.04058	7.43515	9.57548	9.55784	8.24038	7.76872	7.84713	7.79133
223915_at	g11907999	54880	BCOR	BCL6 corepressor	Dampen: FDR p>0.05, |FC|>1.55 for rho(0αKG)/rho(0CTL)	1.282	2.43176	0.00127	0.019687	0.358	1.28165	0.2301	0.43537	-0.925	-1.89868	0.00884	0.170345	223915_at	P	P	P	P	P	P	P	P	P	223915_at	7.20699	7.93686	8.20985	9.5287	8.88777	8.7836	7.97484	8.29601	8.15545
210910_s_at	g12653432	22932	POMZP3	POM121 and ZP3 fusion	Dampen: FDR p>0.05, |FC|>1.55 for rho(0αKG)/rho(0CTL)	1.279	2.42671	1e-05	0.001262	0.541	1.45498	0.00474	0.03702	-0.738	-1.66786	0.00067	0.051158	210910_s_at	P	P	P	P	P	P	P	P	P	210910_s_at	6.66501	6.60985	6.61437	8.0422	7.80859	7.87686	7.10169	6.957	7.45442
204441_s_at	g4505928	23649	POLA2	polymerase (DNA directed), alpha 2, accessory subunit	Dampen: FDR p>0.05, |FC|>1.55 for rho(0αKG)/rho(0CTL)	1.271	2.41329	0.0015	0.021736	0.617	1.53368	0.05662	0.182897	-0.653	-1.57243	0.04601	0.352299	204441_s_at	A	A	P	P	P	P	P	P	P	204441_s_at	7.69714	6.80376	7.80768	8.77673	8.97213	8.37182	7.98264	7.81631	8.36181
227037_at	Hs.31652.0	201164	PLD6	phospholipase D family, member 6	Narrow: FDR p<0.05, |FC|>1.55 for rho(0αKG)/rho(0CTL)	1.261	2.39662	0.00024	0.00755	-0.133	-1.09657	0.54924	0.725596	-1.394	-2.62806	0.00011	0.024566	227037_at	P	P	P	P	P	P	P	P	P	227037_at	9.56048	9.02774	8.82777	10.6545	10.4521	10.091	9.14435	9.02952	8.84182
235588_at	Hs.99480.0	157570	ESCO2	establishment of sister chromatid cohesion N-acetyltransferase 2	Dampen: FDR p>0.05, |FC|>1.55 for rho(0αKG)/rho(0CTL)	1.251	2.38006	0.00153	0.022033	0.578	1.49278	0.06816	0.205772	-0.673	-1.59438	0.03905	0.328564	235588_at	P	P	P	P	P	P	P	P	P	235588_at	8.81863	8.25358	8.99985	10.1679	10.135	9.52196	9.58133	9.43526	8.78898
240084_at	Hs.194049.0	84733	CBX2	chromobox homolog 2	Dampen: FDR p>0.05, |FC|>1.55 for rho(0αKG)/rho(0CTL)	1.243	2.3669	0.0017	0.023466	0.223	1.16716	0.44954	0.646673	-1.021	-2.02933	0.00558	0.138108	240084_at	A	A	P	P	P	P	A	P	P	240084_at	6.13837	5.77896	6.66521	7.00717	7.34944	7.95616	6.27864	6.65597	6.3162
1554020_at	Hs2.164975.2	636	BICD1	bicaudal D homolog 1 (Drosophila)	Dampen: FDR p>0.05, |FC|>1.55 for rho(0αKG)/rho(0CTL)	1.233	2.35055	7e-05	0.003926	0.53	1.44393	0.01629	0.081417	-0.704	-1.62902	0.00354	0.11068	1554020_at	P	P	P	P	P	P	P	P	P	1554020_at	8.39184	8.57333	8.06624	9.38413	9.59243	9.75533	8.63531	8.8798	9.10523
215040_at	Hs.306291.0	79621	RNASEH2B	ribonuclease H2, subunit B	Dampen: FDR p>0.05, |FC|>1.55 for rho(0αKG)/rho(0CTL)	1.225	2.33755	0.00158	0.022492	0.442	1.35849	0.1418	0.324355	-0.783	-1.72071	0.01898	0.240402	215040_at	A	A	A	P	P	P	P	P	A	215040_at	4.45375	4.03065	4.99285	5.2799	5.75462	6.11745	4.85635	5.15009	4.7961
204492_at	g7661857	9824	ARHGAP11A	Rho GTPase activating protein 11A	Dampen: FDR p>0.05, |FC|>1.55 for rho(0αKG)/rho(0CTL)	1.22	2.32947	0.00128	0.019753	0.573	1.48761	0.05876	0.187193	-0.648	-1.56699	0.03696	0.3217	204492_at	P	P	P	P	P	P	P	P	P	204492_at	7.91325	7.0473	7.90115	8.61937	9.06305	8.84051	8.27146	8.48508	7.8231
222653_at	Hs.267963.0	55163	PNPO	pyridoxamine 5'-phosphate oxidase	Dampen: FDR p>0.05, |FC|>1.55 for rho(0αKG)/rho(0CTL)	1.219	2.32785	9e-05	0.004499	0.421	1.33886	0.04709	0.162295	-0.798	-1.73869	0.00185	0.081411	222653_at	P	P	P	P	P	P	P	P	P	222653_at	6.46526	5.95679	6.55038	7.47791	7.41101	7.73962	6.54557	6.80857	6.88137
205364_at	g4501868	8309	ACOX2	acyl-CoA oxidase 2, branched chain	Dampen: FDR p>0.05, |FC|>1.55 for rho(0αKG)/rho(0CTL)	1.216	2.32302	0.002	0.025903	0.519	1.43296	0.09962	0.260507	-0.697	-1.62113	0.03579	0.317235	205364_at	A	A	A	P	P	P	A	A	A	205364_at	6.31822	5.88666	5.98037	6.66247	7.21456	7.95736	6.60935	6.60935	6.52339
1557349_at	Hs2.380090.1	473	RERE	arginine-glutamic acid dipeptide (RE) repeats	Dampen: FDR p>0.05, |FC|>1.55 for rho(0αKG)/rho(0CTL)	1.205	2.30537	0.00019	0.006547	0.26	1.19748	0.22257	0.426803	-0.946	-1.92652	0.00103	0.062902	1557349_at	A	P	A	P	P	P	P	P	A	1557349_at	4.59101	5.15337	4.98454	5.82325	6.02666	6.49493	5.1524	5.21173	5.14411
229551_x_at	Hs.48480.0	195828	ZNF367	zinc finger protein 367	Dampen: FDR p>0.05, |FC|>1.55 for rho(0αKG)/rho(0CTL)	1.19	2.28153	0.00566	0.048709	0.34	1.26576	0.3291	0.538301	-0.85	-1.8025	0.02969	0.291771	229551_x_at	P	P	P	P	P	P	P	P	P	229551_x_at	9.83904	8.78635	10.0792	10.8595	11.0441	10.3697	10.1812	9.90291	9.63963
1558706_a_at	Hs2.50963.1	84913	ATOH8	atonal bHLH transcription factor 8	Dampen: FDR p>0.05, |FC|>1.55 for rho(0αKG)/rho(0CTL)	1.187	2.27679	0.00086	0.015755	0.023	1.01607	0.92529	0.962381	-1.164	-2.24078	0.00099	0.061677	1558706_a_at	P	P	P	P	P	P	P	P	M	1558706_a_at	5.02289	5.06237	5.49607	6.34467	6.85947	5.9388	5.00945	5.17693	5.46515
224753_at	Hs.23044.2	113130	CDCA5	cell division cycle associated 5	Dampen: FDR p>0.05, |FC|>1.55 for rho(0αKG)/rho(0CTL)	1.183	2.27048	0.00068	0.013693	0.378	1.29954	0.13921	0.320709	-0.805	-1.74715	0.0073	0.15533	224753_at	P	P	P	P	P	P	P	P	P	224753_at	10.1247	9.19673	10.0471	11.0455	11.1233	10.749	10.1825	10.1825	10.1387
221639_x_at	Hs.103804.1	3192	HNRNPU	heterogeneous nuclear ribonucleoprotein U (scaffold attachment factor A)	Dampen: FDR p>0.05, |FC|>1.55 for rho(0αKG)/rho(0CTL)	1.182	2.26891	0.00043	0.010632	0.38	1.30134	0.11606	0.286082	-0.802	-1.74352	0.0052	0.134199	221639_x_at	P	P	P	P	P	P	P	P	P	221639_x_at	8.62519	8.02492	7.99203	9.42915	9.71985	9.03833	8.70305	8.45429	8.62519
218350_s_at	g7705681	51053	GMNN	geminin, DNA replication inhibitor	Dampen: FDR p>0.05, |FC|>1.55 for rho(0αKG)/rho(0CTL)	1.178	2.26263	9e-05	0.004236	0.445	1.36131	0.03143	0.124989	-0.733	-1.66209	0.00235	0.091093	218350_s_at	P	P	P	P	P	P	P	P	P	218350_s_at	10.738	10.168	10.7569	11.7995	11.8482	11.5481	11.055	11.0353	10.9078
1555225_at	Hs2.355906.4	25912	C1orf43	chromosome 1 open reading frame 43	Dampen: FDR p>0.05, |FC|>1.55 for rho(0αKG)/rho(0CTL)	1.174	2.25636	0.00174	0.02378	0.524	1.43794	0.08134	0.229614	-0.65	-1.56917	0.03777	0.324348	1555225_at	P	P	P	P	P	P	P	P	P	1555225_at	11.8107	10.9545	10.7612	12.5903	12.4115	12.047	11.5398	11.6769	11.882
209942_x_at	g12653144	4102	MAGEA3	MAGE family member A3	Dampen: FDR p>0.05, |FC|>1.55 for rho(0αKG)/rho(0CTL)	1.171	2.25168	0.00061	0.012954	0.459	1.37459	0.0744	0.217514	-0.712	-1.63807	0.0122	0.19705	209942_x_at	A	A	A	A	P	A	A	A	A	209942_x_at	4.2358	4.36924	4.46222	4.92357	5.79461	5.86312	4.81511	4.81511	4.81511
221436_s_at	g13876383	83461	CDCA3	cell division cycle associated 3	Narrow: FDR p<0.05, |FC|>1.55 for rho(0αKG)/rho(0CTL)	1.171	2.25168	0.00011	0.004901	0.157	1.11497	0.40465	0.607397	-1.014	-2.0195	0.00032	0.036731	221436_s_at	P	P	P	P	P	P	P	P	P	221436_s_at	8.69435	7.98472	8.27218	9.36926	9.42777	9.66756	8.5252	8.47956	8.417
214612_x_at	Hs.278460.0	4105	MAGEA6	MAGE family member A6	Dampen: FDR p>0.05, |FC|>1.55 for rho(0αKG)/rho(0CTL)	1.166	2.24389	0.00023	0.007344	0.47	1.38511	0.04081	0.14809	-0.696	-1.62001	0.00639	0.146891	214612_x_at	A	A	A	A	P	P	A	A	A	214612_x_at	3.58161	3.88921	3.82827	4.48625	5.00965	5.30125	4.26582	4.26582	4.17752
204749_at	g4758757	4675	NAP1L3	nucleosome assembly protein 1-like 3	Dampen: FDR p>0.05, |FC|>1.55 for rho(0αKG)/rho(0CTL)	1.163	2.23923	0.00035	0.009361	0.119	1.08598	0.58211	0.749676	-1.044	-2.06194	0.00074	0.053851	204749_at	P	P	P	P	P	P	P	P	P	204749_at	6.74555	7.30853	6.5208	7.84078	8.20186	8.02088	7.18941	6.86823	6.8741
228966_at	Hs.286212.2	80025	PANK2	pantothenate kinase 2	Narrow: FDR p<0.05, |FC|>1.55 for rho(0αKG)/rho(0CTL)	1.159	2.23303	0.0012	0.01914	-0.395	-1.31494	0.1468	0.331703	-1.554	-2.9363	0.00015	0.027983	228966_at	P	P	P	P	P	P	P	P	P	228966_at	6.11007	6.12328	5.76864	7.39872	7.13752	6.94337	5.41307	6.18646	5.21677
221587_s_at	g12654144	55009	C19orf24	chromosome 19 open reading frame 24	Dampen: FDR p>0.05, |FC|>1.55 for rho(0αKG)/rho(0CTL)	1.151	2.22068	0.00193	0.025396	0.514	1.428	0.08539	0.236496	-0.637	-1.55509	0.04046	0.334053	221587_s_at	P	P	P	P	P	P	P	P	P	221587_s_at	8.73124	8.55856	8.66079	10.2082	10.0492	9.14657	9.12432	8.90418	9.4652
243508_at	Hs.20304.2	149840	C20orf196	chromosome 20 open reading frame 196	Dampen: FDR p>0.05, |FC|>1.55 for rho(0αKG)/rho(0CTL)	1.143	2.2084	0.0019	0.025139	0.337	1.26313	0.23346	0.43892	-0.807	-1.74957	0.0136	0.206611	243508_at	P	P	A	P	P	P	A	P	A	243508_at	5.36255	5.35767	5.27434	6.0154	6.47477	6.93423	5.19082	5.75992	6.05382
204339_s_at	g12653888	5999	RGS4	regulator of G-protein signaling 4	Dampen: FDR p>0.05, |FC|>1.55 for rho(0αKG)/rho(0CTL)	1.14	2.20381	0.00127	0.019719	0.339	1.26488	0.20292	0.403725	-0.801	-1.74231	0.01017	0.182023	204339_s_at	A	A	A	P	P	P	P	A	A	204339_s_at	5.58728	5.71243	5.88146	7.00503	7.34215	6.25548	6.18647	6.09418	5.91876
201267_s_at	Hs.250758.0	5702	PSMC3	proteasome 26S subunit, ATPase 3	Dampen: FDR p>0.05, |FC|>1.55 for rho(0αKG)/rho(0CTL)	1.138	2.20076	0.00025	0.007808	0.402	1.32134	0.06974	0.20872	-0.736	-1.66555	0.00447	0.123762	201267_s_at	P	P	P	P	P	P	P	P	P	201267_s_at	9.07131	8.33333	8.48027	9.64637	9.75392	9.89931	9.17631	9.0634	8.852
205083_at	g6598319	316	AOX1	aldehyde oxidase 1	Dampen: FDR p>0.05, |FC|>1.55 for rho(0αKG)/rho(0CTL)	1.137	2.19923	0.00082	0.015291	0.409	1.32777	0.10954	0.276286	-0.727	-1.65519	0.01168	0.193026	205083_at	P	A	P	P	P	P	P	M	P	205083_at	4.10631	3.62808	4.08691	4.70287	5.14031	5.38766	4.38719	4.01231	4.64972
1554574_a_at	Hs2.274464.3	1727	CYB5R3	cytochrome b5 reductase 3	Narrow (marginal): FDR p<0.05, |FC|<1.55 for rho(0αKG)/rho(0CTL)	1.133	2.19314	0	0.000839	0.503	1.41716	0.00206	0.021576	-0.63	-1.54756	0.00046	0.04365	1554574_a_at	P	P	P	P	P	P	P	P	P	1554574_a_at	8.34611	8.50381	8.36959	9.41168	9.50993	9.69722	8.97337	8.85459	8.90065
228717_at	Hs.19312.0	102723864	LOC102723864	uncharacterized LOC102723864	Dampen: FDR p>0.05, |FC|>1.55 for rho(0αKG)/rho(0CTL)	1.128	2.18556	0.00112	0.01839	0.49	1.40444	0.07124	0.211543	-0.638	-1.55617	0.02603	0.274271	228717_at	P	P	P	P	P	P	P	P	P	228717_at	6.59023	6.56926	6.14896	7.74052	7.91271	7.04048	6.66811	7.05269	7.05855
230021_at	Hs.124874.0	90381	TICRR	TOPBP1-interacting checkpoint and replication regulator	Dampen: FDR p>0.05, |FC|>1.55 for rho(0αKG)/rho(0CTL)	1.128	2.18556	0.00079	0.015016	0.459	1.37459	0.07496	0.218476	-0.67	-1.59107	0.01654	0.226496	230021_at	P	P	P	P	P	P	P	P	M	230021_at	7.8459	6.94086	7.7461	8.83114	8.63349	8.45328	7.88091	8.01397	8.01397
228827_at	Hs.90858.0	862	RUNX1T1	runt-related transcription factor 1; translocated to, 1 (cyclin D-related)	Dampen: FDR p>0.05, |FC|>1.55 for rho(0αKG)/rho(0CTL)	1.117	2.16895	0.0026	0.030591	0.17	1.12506	0.54554	0.722481	-0.947	-1.92786	0.0068	0.150685	228827_at	P	P	P	P	P	P	P	P	P	228827_at	6.82687	6.83526	7.82712	8.06233	8.43997	8.33773	7.38248	7.55654	7.06055
226278_at	Hs.284136.8	258010	SVIP	small VCP/p97-interacting protein	Dampen: FDR p>0.05, |FC|>1.55 for rho(0αKG)/rho(0CTL)	1.115	2.16595	0.00556	0.048225	0.464	1.37936	0.16614	0.357262	-0.652	-1.57135	0.06338	0.399698	226278_at	P	P	P	P	P	P	P	P	P	226278_at	7.03398	7.24231	7.17289	7.80413	7.91271	9.07838	7.65249	7.84755	7.3404
1552546_a_at	Hs2.125266.1	137994	LETM2	leucine zipper-EF-hand containing transmembrane protein 2	Narrow: FDR p<0.05, |FC|>1.55 for rho(0αKG)/rho(0CTL)	1.115	2.16595	0.00047	0.011065	-0.18	-1.13288	0.41162	0.613655	-1.295	-2.45377	0.00016	0.028285	1552546_a_at	P	P	P	P	P	P	P	P	P	1552546_a_at	8.65453	8.3775	8.51478	9.99567	9.77074	9.12608	8.26911	8.29301	8.44546
204531_s_at	g6552300	672	BRCA1	breast cancer 1, early onset	Dampen: FDR p>0.05, |FC|>1.55 for rho(0αKG)/rho(0CTL)	1.114	2.16445	0.00066	0.013501	0.48	1.39474	0.05576	0.181151	-0.634	-1.55186	0.01769	0.233046	204531_s_at	P	P	P	P	P	P	P	P	P	204531_s_at	7.67333	6.96789	7.91169	8.73038	8.65453	8.51053	7.99981	8.08205	7.91189
223307_at	g12803452	83461	CDCA3	cell division cycle associated 3	Narrow: FDR p<0.05, |FC|>1.55 for rho(0αKG)/rho(0CTL)	1.111	2.15995	0.00011	0.004852	-0.002	-1.00139	0.99145	0.996077	-1.113	-2.16295	0.00011	0.024058	223307_at	P	P	P	P	P	P	P	P	P	223307_at	8.35595	8.23861	8.688	9.29557	9.70013	9.6194	8.48011	8.57269	8.22415
239816_at	Hs.208062.0	10714	POLD3	polymerase (DNA-directed), delta 3, accessory subunit	Dampen: FDR p>0.05, |FC|>1.55 for rho(0αKG)/rho(0CTL)	1.105	2.15099	0.00078	0.014804	0.315	1.24401	0.19017	0.388404	-0.79	-1.72907	0.00621	0.145087	239816_at	P	P	A	P	P	P	P	P	P	239816_at	6.21311	5.87881	6.01821	7.43058	7.29517	6.69802	6.14228	6.21546	6.69699
219243_at	g8922872	55303	GIMAP4	GTPase, IMAP family member 4	Dampen: FDR p>0.05, |FC|>1.55 for rho(0αKG)/rho(0CTL)	1.097	2.13909	0.00153	0.022002	0.252	1.19086	0.33005	0.53931	-0.845	-1.79626	0.00721	0.154755	219243_at	A	A	A	P	A	P	P	A	A	219243_at	3.43259	3.48576	3.01186	4.53378	3.83671	4.85067	3.63562	3.51389	3.53572
235117_at	Hs.105223.0	494143	CHAC2	ChaC, cation transport regulator homolog 2 (E. coli)	Dampen: FDR p>0.05, |FC|>1.55 for rho(0αKG)/rho(0CTL)	1.096	2.13761	0.0008	0.015049	0.428	1.34537	0.08523	0.236265	-0.668	-1.58887	0.01462	0.213352	235117_at	P	P	P	P	P	P	P	P	P	235117_at	6.62445	6.94409	7.2974	8.32262	8.1623	7.6685	7.4353	7.5498	7.16515
226479_at	Hs.112198.0	89890	KBTBD6	kelch repeat and BTB (POZ) domain containing 6	Narrow: FDR p<0.05, |FC|>1.55 for rho(0αKG)/rho(0CTL)	1.093	2.13317	2e-05	0.002048	-0.005	-1.00347	0.97298	0.986827	-1.098	-2.14058	2e-05	0.013234	226479_at	P	P	P	P	P	P	P	P	P	226479_at	9.32988	9.62717	9.55403	10.5322	10.7431	10.5141	9.67553	9.4645	9.35666
227315_x_at	Hs.301959.1	11212	PROSC	proline synthetase co-transcribed homolog (bacterial)	Dampen: FDR p>0.05, |FC|>1.55 for rho(0αKG)/rho(0CTL)	1.092	2.13169	0.00024	0.007556	0.408	1.32685	0.05599	0.181602	-0.684	-1.60659	0.00508	0.132698	227315_x_at	P	P	P	P	P	P	P	P	P	227315_x_at	5.84735	6.32488	6.08364	6.89521	7.0885	7.54701	6.51861	6.51861	6.44126
206404_at	g4503706	2254	FGF9	fibroblast growth factor 9	Narrow: FDR p<0.05, |FC|>1.55 for rho(0αKG)/rho(0CTL)	1.085	2.12138	6e-05	0.003486	0.255	1.19334	0.13238	0.310486	-0.83	-1.77769	0.00045	0.043497	206404_at	P	P	P	P	P	P	P	P	P	206404_at	8.63539	8.52642	8.55176	9.52749	9.43526	10.007	8.81633	8.86969	8.79341
241534_at	Hs.145225.0	100505549	LOC100505549	uncharacterized LOC100505549	Dampen: FDR p>0.05, |FC|>1.55 for rho(0αKG)/rho(0CTL)	1.078	2.11111	0.00185	0.024755	0.295	1.22688	0.26447	0.472602	-0.783	-1.72071	0.01151	0.191523	241534_at	P	P	P	P	P	P	P	P	P	241534_at	4.68166	5.16341	5.43704	5.93082	6.63545	5.94929	5.21087	5.61768	5.33723
230426_at	Hs.74635.1	1738	DLD	dihydrolipoamide dehydrogenase	Dampen: FDR p>0.05, |FC|>1.55 for rho(0αKG)/rho(0CTL)	1.075	2.10672	0.00124	0.019499	0.17	1.12506	0.48303	0.674033	-0.905	-1.87254	0.00364	0.111566	230426_at	P	P	P	P	P	P	P	P	P	230426_at	7.3083	7.24025	7.86166	8.42409	8.80044	8.40969	7.84321	7.86166	7.21456
224202_at	g6689887	51684	SUFU	suppressor of fused homolog (Drosophila)	Narrow: FDR p<0.05, |FC|>1.55 for rho(0αKG)/rho(0CTL)	1.073	2.1038	0.00031	0.008662	-0.308	-1.23799	0.13739	0.3182	-1.381	-2.60449	5e-05	0.017661	224202_at	P	P	P	P	P	P	P	P	A	224202_at	7.54181	7.3608	7.13522	8.4754	8.2955	8.48472	7.27717	7.20658	6.62926
222126_at	Hs.251678.0	3268	AGFG2	ArfGAP with FG repeats 2	Dampen: FDR p>0.05, |FC|>1.55 for rho(0αKG)/rho(0CTL)	1.069	2.09798	0.00118	0.019003	0.314	1.24315	0.20337	0.404289	-0.755	-1.68763	0.00932	0.174713	222126_at	P	P	A	P	P	P	P	P	P	222126_at	7.87575	6.94407	7.06784	8.45067	8.36469	8.27839	7.74146	7.42171	7.6667
223743_s_at	g12653924	51073	MRPL4	mitochondrial ribosomal protein L4	Dampen: FDR p>0.05, |FC|>1.55 for rho(0αKG)/rho(0CTL)	1.066	2.09362	0.00063	0.013149	0.203	1.15109	0.35352	0.561835	-0.863	-1.81882	0.00251	0.093656	223743_s_at	P	P	P	P	P	P	P	P	P	223743_s_at	8.06605	8.13539	7.52375	8.75196	9.04342	9.12808	8.13349	7.82122	8.38069
225304_s_at	Hs.1665.1	126328	NDUFA11	NADH dehydrogenase (ubiquinone) 1 alpha subcomplex, 11, 14.7kDa	Dampen: FDR p>0.05, |FC|>1.55 for rho(0αKG)/rho(0CTL)	1.064	2.09072	0.00087	0.0158	0.275	1.20999	0.23755	0.443291	-0.788	-1.72668	0.00558	0.138108	225304_s_at	P	P	P	P	P	P	P	P	P	225304_s_at	6.90983	6.42624	7.05675	7.48437	7.96304	8.13624	6.90862	7.03549	7.27481
218866_s_at	g7706498	51728	POLR3K	polymerase (RNA) III (DNA directed) polypeptide K, 12.3 kDa	Dampen: FDR p>0.05, |FC|>1.55 for rho(0αKG)/rho(0CTL)	1.064	2.09072	9e-05	0.004277	0.419	1.337	0.02657	0.11177	-0.645	-1.56374	0.00279	0.09874	218866_s_at	P	P	P	P	P	P	P	P	P	218866_s_at	8.63086	8.09085	8.49606	9.48241	9.61361	9.31448	8.74021	8.84679	8.88818
229236_s_at	Hs.19954.0	119559	SFXN4	sideroflexin 4	Dampen: FDR p>0.05, |FC|>1.55 for rho(0αKG)/rho(0CTL)	1.061	2.08638	0.00037	0.009782	0.35	1.27456	0.1018	0.264139	-0.711	-1.63694	0.00496	0.13078	229236_s_at	P	P	P	P	P	P	P	P	P	229236_s_at	7.25223	6.75817	7.02819	8.36698	8.12158	7.73268	7.18938	7.41576	7.48397
1553111_a_at	Hs2.112198.1	89890	KBTBD6	kelch repeat and BTB (POZ) domain containing 6	Narrow: FDR p<0.05, |FC|>1.55 for rho(0αKG)/rho(0CTL)	1.059	2.08349	0.00011	0.004833	-0.239	-1.18017	0.17341	0.366996	-1.298	-2.45888	2e-05	0.013234	1553111_a_at	P	P	P	P	P	P	P	P	P	1553111_a_at	7.29025	7.66286	7.75993	8.5691	8.59552	8.72596	7.55835	7.30655	7.13126
208828_at	g13278800	54107	POLE3	polymerase (DNA directed), epsilon 3, accessory subunit	Dampen: FDR p>0.05, |FC|>1.55 for rho(0αKG)/rho(0CTL)	1.048	2.06766	0.00065	0.013404	0.369	1.29146	0.10597	0.270903	-0.679	-1.60103	0.00918	0.17328	208828_at	P	P	P	P	P	P	P	P	P	208828_at	8.6461	7.94808	8.20397	9.50465	9.47494	8.96147	8.55989	8.68639	8.65856
204653_at	Hs.18387.0	7020	TFAP2A	transcription factor AP-2 alpha (activating enhancer binding protein 2 alpha)	Narrow: FDR p<0.05, |FC|>1.55 for rho(0αKG)/rho(0CTL)	1.048	2.06766	0.00064	0.013305	-0.015	-1.01045	0.94172	0.970411	-1.063	-2.08927	0.00058	0.04825	204653_at	P	P	P	P	P	P	P	P	P	204653_at	8.13432	7.91372	7.89881	8.77474	8.76441	9.55069	7.99256	7.9636	7.94446
213297_at	Hs.23990.1	64777	RMND5B	required for meiotic nuclear division 5 homolog B	Dampen: FDR p>0.05, |FC|>1.55 for rho(0αKG)/rho(0CTL)	1.047	2.06623	0.00175	0.023847	0.375	1.29684	0.14995	0.336021	-0.672	-1.59328	0.02008	0.246187	213297_at	P	P	P	P	P	P	P	P	P	213297_at	8.97556	8.56422	8.52943	9.42167	9.4937	10.2956	8.88933	9.1246	9.18068
1570130_at	Hs2.382094.1	65244	SPATS2	spermatogenesis associated, serine-rich 2	Dampen: FDR p>0.05, |FC|>1.55 for rho(0αKG)/rho(0CTL)	1.039	2.0548	0.00011	0.004901	0.295	1.22688	0.09663	0.255238	-0.744	-1.67481	0.00117	0.065852	1570130_at	A	M	A	P	P	P	P	A	A	1570130_at	3.57141	3.77767	3.39596	4.3116	4.77871	4.7709	3.91196	3.87436	3.84411
1569256_a_at	Hs2.321718.1	163933	FAM43B	family with sequence similarity 43, member B	Dampen: FDR p>0.05, |FC|>1.55 for rho(0αKG)/rho(0CTL)	1.038	2.05338	0.00014	0.005567	0.301	1.232	0.10001	0.261078	-0.737	-1.66671	0.00154	0.074298	1569256_a_at	A	A	A	A	A	P	A	A	A	1569256_a_at	6.37675	6.04101	5.90666	6.90519	7.13316	7.40148	6.40322	6.43093	6.39445
235502_at	Hs.79204.0	5515	PPP2CA	protein phosphatase 2, catalytic subunit, alpha isozyme	Dampen: FDR p>0.05, |FC|>1.55 for rho(0αKG)/rho(0CTL)	1.029	2.04061	0.00323	0.034794	0.16	1.11729	0.55225	0.728065	-0.869	-1.8264	0.00841	0.165982	235502_at	P	P	P	P	P	P	P	P	P	235502_at	6.96474	6.93519	7.56703	7.8736	8.03349	8.64606	7.39567	7.57572	6.97453
229426_at	Hs.181028.2	9377	COX5A	cytochrome c oxidase subunit Va	Dampen: FDR p>0.05, |FC|>1.55 for rho(0αKG)/rho(0CTL)	1.022	2.03073	0.00022	0.00724	0.246	1.18591	0.1872	0.384925	-0.776	-1.71238	0.00148	0.073195	229426_at	P	P	P	P	P	P	P	P	P	229426_at	6.97809	6.67513	7.16057	7.81249	8.24197	7.82425	7.30077	7.21231	7.03741
1554623_x_at	Hs2.54506.2	8526	DGKE	diacylglycerol kinase, epsilon 64kDa	Dampen: FDR p>0.05, |FC|>1.55 for rho(0αKG)/rho(0CTL)	1.02	2.02792	0.00167	0.023252	0.038	1.02669	0.87277	0.934286	-0.982	-1.9752	0.00213	0.085938	1554623_x_at	P	P	P	P	P	P	P	P	P	1554623_x_at	6.37182	6.64408	6.60767	8.07687	7.51283	7.09373	6.39815	6.74999	6.58936
214005_at	Hs.77719.1	2677	GGCX	gamma-glutamyl carboxylase	Dampen: FDR p>0.05, |FC|>1.55 for rho(0αKG)/rho(0CTL)	1.019	2.02651	0.00013	0.005437	0.37	1.29235	0.04664	0.161318	-0.649	-1.56808	0.00293	0.100801	214005_at	P	P	P	P	P	P	P	P	P	214005_at	9.73534	9.67341	9.35688	10.7696	10.5368	10.5162	9.7237	9.97696	10.1749
214545_s_at	Hs.301959.2	11212	PROSC	proline synthetase co-transcribed homolog (bacterial)	Dampen: FDR p>0.05, |FC|>1.55 for rho(0αKG)/rho(0CTL)	1.017	2.02371	0.00091	0.016278	0.347	1.27191	0.13173	0.309633	-0.669	-1.58997	0.01096	0.186945	214545_s_at	P	P	P	P	P	P	P	P	P	214545_s_at	6.78482	7.34243	6.90842	7.82051	7.98122	8.28456	7.02096	7.44453	7.61247
207075_at	g4757727	114548	NLRP3	NLR family, pyrin domain containing 3	Dampen: FDR p>0.05, |FC|>1.55 for rho(0αKG)/rho(0CTL)	0.997	1.99585	0.00165	0.023115	0.291	1.22349	0.2283	0.433395	-0.706	-1.63127	0.01197	0.195291	207075_at	P	P	P	P	P	P	P	P	P	207075_at	6.10835	5.92425	6.48015	7.41207	7.35545	6.73525	6.56587	6.18681	6.63215
214794_at	Hs.5181.2	5036	PA2G4	proliferation-associated 2G4	Dampen: FDR p>0.05, |FC|>1.55 for rho(0αKG)/rho(0CTL)	0.986	1.98069	0.00095	0.016704	0.269	1.20497	0.2208	0.424658	-0.717	-1.64376	0.00665	0.148828	214794_at	P	P	P	P	P	P	P	P	P	214794_at	9.73433	9.22185	9.82808	10.4268	10.6995	10.6162	10.0317	10.049	9.51025
1554621_at	Hs2.54506.2	8526	DGKE	diacylglycerol kinase, epsilon 64kDa	Dampen: FDR p>0.05, |FC|>1.55 for rho(0αKG)/rho(0CTL)	0.98	1.97247	0.0013	0.019832	0.173	1.1274	0.43677	0.635636	-0.806	-1.74836	0.00432	0.121993	1554621_at	P	P	P	P	P	P	P	P	P	1554621_at	8.42436	8.55124	8.77411	10.0429	9.48443	9.16111	8.6762	8.70424	8.88895
221096_s_at	g8924057	55374	TMCO6	transmembrane and coiled-coil domains 6	Narrow: FDR p<0.05, |FC|>1.55 for rho(0αKG)/rho(0CTL)	0.967	1.95477	0.0001	0.004611	0.134	1.09733	0.38274	0.587941	-0.833	-1.78139	0.0003	0.036113	221096_s_at	P	P	P	P	P	P	P	P	P	221096_s_at	9.06344	8.98967	8.55565	9.82315	9.90835	9.77894	8.95967	9.06344	8.98779
209408_at	g1695881	11004	KIF2C	kinesin family member 2C	Dampen: FDR p>0.05, |FC|>1.55 for rho(0αKG)/rho(0CTL)	0.965	1.95206	0.0006	0.012772	0.299	1.23029	0.14426	0.328139	-0.666	-1.58667	0.00611	0.144348	209408_at	P	P	P	P	P	P	P	P	P	209408_at	9.83687	9.38191	9.20299	10.4263	10.2295	10.6621	9.91832	9.6336	9.76687
238190_at	Hs.171379.0	7284	TUFM	Tu translation elongation factor, mitochondrial	Dampen: FDR p>0.05, |FC|>1.55 for rho(0αKG)/rho(0CTL)	0.964	1.95071	0.00422	0.040974	0.015	1.01045	0.95428	0.976509	-0.949	-1.93053	0.00462	0.125772	238190_at	P	P	P	P	P	P	P	P	P	238190_at	9.23541	8.95393	9.03235	10.3671	10.3816	9.36437	9.18577	8.99112	9.08959
230472_at	Hs.109525.0	79192	IRX1	iroquois homeobox 1	Dampen: FDR p>0.05, |FC|>1.55 for rho(0αKG)/rho(0CTL)	0.963	1.94936	0.0009	0.016054	0.155	1.11342	0.45389	0.649999	-0.808	-1.75078	0.00276	0.098465	230472_at	P	P	A	P	P	P	P	P	P	230472_at	7.20014	6.82887	7.07022	7.67389	7.87085	8.44466	7.09715	7.21092	7.25605
200648_s_at	g4504026	2752	GLUL	glutamate-ammonia ligase	Dampen: FDR p>0.05, |FC|>1.55 for rho(0αKG)/rho(0CTL)	0.954	1.93724	0.00314	0.034108	0.254	1.19251	0.31469	0.524328	-0.7	-1.6245	0.01672	0.227761	200648_s_at	P	P	P	P	P	P	P	P	P	200648_s_at	9.68917	9.24019	9.38239	9.97565	10.242	10.9551	9.75558	9.75558	9.56259
204559_s_at	g7706422	51690	LSM7	LSM7 homolog, U6 small nuclear RNA and mRNA degradation associated	Dampen: FDR p>0.05, |FC|>1.55 for rho(0αKG)/rho(0CTL)	0.954	1.93724	0.00555	0.048205	0.186	1.13761	0.49707	0.685676	-0.768	-1.70291	0.01715	0.230187	204559_s_at	P	P	P	P	P	P	P	P	P	204559_s_at	8.01282	7.63327	7.33679	8.18518	8.53386	9.12497	7.65083	8.13209	7.75844
1564385_at	Hs2.350848.2	219688	LOC219688	uncharacterized LOC219688	Dampen: FDR p>0.05, |FC|>1.55 for rho(0αKG)/rho(0CTL)	0.933	1.90924	0.00163	0.022962	0.227	1.1704	0.30833	0.518081	-0.706	-1.63127	0.00841	0.165982	1564385_at	A	A	A	A	A	A	A	A	A	1564385_at	4.13857	4.55122	4.50465	5.76955	5.09321	5.13198	4.65044	4.41185	4.81303
209355_s_at	g2467299	8613	PLPP3	phospholipid phosphatase 3	Dampen: FDR p>0.05, |FC|>1.55 for rho(0αKG)/rho(0CTL)	0.932	1.90792	0.00546	0.047766	0.067	1.04754	0.79913	0.891532	-0.865	-1.82134	0.00824	0.164455	209355_s_at	P	P	P	P	P	P	A	P	A	209355_s_at	5.26374	5.64163	5.75905	6.88308	6.70605	5.87227	5.75905	5.46077	5.64621
216855_s_at	Hs.103804.2	3192	HNRNPU	heterogeneous nuclear ribonucleoprotein U (scaffold attachment factor A)	Dampen: FDR p>0.05, |FC|>1.55 for rho(0αKG)/rho(0CTL)	0.931	1.9066	0.00021	0.007149	0.202	1.15029	0.22759	0.432527	-0.729	-1.65749	0.00118	0.065999	216855_s_at	P	P	P	P	P	P	P	P	P	216855_s_at	9.41049	9.075	9.29089	10.1714	10.4173	9.98137	9.53816	9.27508	9.56954
241360_at	Hs.116131.0	80071	CCDC15	coiled-coil domain containing 15	Dampen: FDR p>0.05, |FC|>1.55 for rho(0αKG)/rho(0CTL)	0.926	1.9	0.00225	0.027927	-0.124	-1.08975	0.58481	0.751238	-1.05	-2.07053	0.001	0.062307	241360_at	P	P	P	P	P	P	P	P	P	241360_at	5.42623	5.79845	6.15987	6.41454	6.65937	7.08787	5.75534	5.70826	5.54807
211730_s_at	g13543491	5441	POLR2L	polymerase (RNA) II (DNA directed) polypeptide L, 7.6kDa	Dampen: FDR p>0.05, |FC|>1.55 for rho(0αKG)/rho(0CTL)	0.923	1.89605	0.00054	0.011944	0.212	1.15829	0.25852	0.466204	-0.711	-1.63694	0.00295	0.101212	211730_s_at	P	P	P	P	P	P	P	P	P	211730_s_at	10.6196	10.601	10.7703	11.2559	11.5362	11.9673	10.7697	10.8879	10.97
212766_s_at	Hs.301904.1	81875	ISG20L2	interferon stimulated exonuclease gene 20kDa like 2	Dampen: FDR p>0.05, |FC|>1.55 for rho(0αKG)/rho(0CTL)	0.922	1.89474	0.00477	0.044093	0.261	1.19831	0.32018	0.529252	-0.662	-1.58227	0.02562	0.272147	212766_s_at	P	P	P	P	P	P	P	P	P	212766_s_at	8.68562	8.95474	9.14882	10.2193	10.0094	9.32651	8.93327	9.14642	9.49107
202780_at	g4557816	5019	OXCT1	3-oxoacid CoA-transferase 1	Dampen: FDR p>0.05, |FC|>1.55 for rho(0αKG)/rho(0CTL)	0.918	1.88949	0.00115	0.018665	0.268	1.20414	0.20426	0.405392	-0.65	-1.56917	0.00898	0.17166	202780_at	P	P	P	P	P	P	P	P	P	202780_at	9.99907	9.75852	10.0419	10.8246	10.8704	10.8574	10.5087	10.3661	9.7284
218115_at	g8922548	55723	ASF1B	anti-silencing function 1B histone chaperone	Narrow: FDR p<0.05, |FC|>1.55 for rho(0αKG)/rho(0CTL)	0.918	1.88949	0.00212	0.026834	-0.335	-1.26138	0.15406	0.341212	-1.253	-2.38337	0.00026	0.033423	218115_at	P	P	P	P	P	P	P	P	P	218115_at	7.81167	7.50311	8.45995	8.82388	8.83841	8.86684	7.47814	7.59472	7.69616
228163_at	Hs.3972.2	27090	ST6GALNAC4	ST6 (alpha-N-acetyl-neuraminyl-2,3-beta-galactosyl-1,3)-N-acetylgalactosaminide alpha-2,6-sialyltransferase 4	Dampen: FDR p>0.05, |FC|>1.55 for rho(0αKG)/rho(0CTL)	0.913	1.88296	0.00042	0.010503	0.217	1.16231	0.22918	0.434385	-0.696	-1.62001	0.00255	0.094294	228163_at	P	M	M	P	P	P	A	P	P	228163_at	6.56686	6.08966	6.43691	7.04751	7.5535	7.22996	6.53117	6.58173	6.63122
218511_s_at	g8922497	55163	PNPO	pyridoxamine 5'-phosphate oxidase	Dampen: FDR p>0.05, |FC|>1.55 for rho(0αKG)/rho(0CTL)	0.901	1.86736	0.00475	0.043975	0.197	1.14631	0.43553	0.634328	-0.703	-1.62789	0.01735	0.231203	218511_s_at	P	P	P	P	P	P	P	P	P	218511_s_at	8.78748	8.86193	9.13698	9.70982	9.35474	10.4236	9.14845	9.08118	9.14845
212240_s_at	Hs.6241.0	5295	PIK3R1	phosphoinositide-3-kinase, regulatory subunit 1 (alpha)	Narrow: FDR p<0.05, |FC|>1.55 for rho(0αKG)/rho(0CTL)	0.898	1.86348	0.0004	0.010221	-0.282	-1.21588	0.11991	0.291944	-1.181	-2.26734	5e-05	0.018536	212240_s_at	P	P	P	P	P	P	P	P	P	212240_s_at	6.43621	7.02718	6.72722	7.62427	7.7004	7.56084	6.59946	6.26732	6.47705
210752_s_at	g11761691	6945	MLX	MLX, MAX dimerization protein	Dampen: FDR p>0.05, |FC|>1.55 for rho(0αKG)/rho(0CTL)	0.89	1.85318	0.00139	0.020744	0.214	1.1599	0.3014	0.511114	-0.675	-1.5966	0.00725	0.155026	210752_s_at	P	P	P	P	P	P	P	P	P	210752_s_at	8.6922	7.99678	8.72775	9.50178	9.36344	9.22016	8.6299	8.77622	8.65348
204504_s_at	g5803030	8479	HIRIP3	HIRA interacting protein 3	Dampen: FDR p>0.05, |FC|>1.55 for rho(0αKG)/rho(0CTL)	0.877	1.83655	0.00032	0.008982	0.242	1.18263	0.15522	0.342859	-0.635	-1.55294	0.00278	0.09868	204504_s_at	P	P	P	P	P	P	P	P	P	204504_s_at	7.58055	7.5518	7.62296	8.23809	8.42652	8.72109	7.61846	7.83621	8.0254
227431_at	Hs.65828.0	100505854	APTR	Alu-mediated CDKN1A/p21 transcriptional regulator (non-protein coding)	Narrow: FDR p<0.05, |FC|>1.55 for rho(0αKG)/rho(0CTL)	0.877	1.83655	4e-05	0.002509	0.242	1.18263	0.06724	0.204067	-0.635	-1.55294	0.0004	0.041305	227431_at	P	P	P	P	P	P	P	P	P	227431_at	7.76923	7.83495	8.01964	8.83505	8.68543	8.73383	8.02035	8.1781	8.15072
221936_x_at	Hs.44017.3	64975	MRPL41	mitochondrial ribosomal protein L41	Dampen: FDR p>0.05, |FC|>1.55 for rho(0αKG)/rho(0CTL)	0.876	1.83528	0.00062	0.013045	0.214	1.1599	0.24159	0.447503	-0.662	-1.58227	0.00373	0.112892	221936_x_at	P	P	P	P	P	P	P	P	P	221936_x_at	8.20754	8.56534	8.41585	9.10757	9.20206	9.50794	8.44398	8.49859	8.88764
220397_at	g9910417	56890	MDM1	Mdm1 nuclear protein	Dampen: FDR p>0.05, |FC|>1.55 for rho(0αKG)/rho(0CTL)	0.875	1.83401	0.00173	0.023723	0.016	1.01115	0.93956	0.969417	-0.86	-1.81504	0.00194	0.082795	220397_at	P	P	P	P	P	P	P	P	P	220397_at	7.5518	7.8567	8.18377	8.94308	8.7547	8.52053	7.85518	8.13661	7.647
225423_x_at	Hs.44017.2	64975	MRPL41	mitochondrial ribosomal protein L41	Dampen: FDR p>0.05, |FC|>1.55 for rho(0αKG)/rho(0CTL)	0.875	1.83401	0.00342	0.035873	0.196	1.14552	0.40071	0.60372	-0.679	-1.60103	0.01364	0.206677	225423_x_at	P	P	P	P	P	P	P	P	P	225423_x_at	8.90141	9.30317	9.23032	9.82445	9.99132	10.2435	9.18144	9.01924	9.82155
218493_at	g13443017	79622	SNRNP25	small nuclear ribonucleoprotein, U11/U12 25kDa subunit	Dampen: FDR p>0.05, |FC|>1.55 for rho(0αKG)/rho(0CTL)	0.875	1.83401	0.00205	0.026348	-0.129	-1.09354	0.54232	0.719944	-1.004	-2.00555	0.00084	0.057084	218493_at	P	P	P	P	P	P	P	P	P	218493_at	9.41074	8.60401	8.7536	9.81793	9.72088	9.85336	8.64134	8.75516	8.98397
201541_s_at	g5453616	10467	ZNHIT1	zinc finger, HIT-type containing 1	Dampen: FDR p>0.05, |FC|>1.55 for rho(0αKG)/rho(0CTL)	0.87	1.82766	0.00079	0.014966	0.22	1.16473	0.24144	0.447354	-0.65	-1.56917	0.00491	0.130054	201541_s_at	P	P	P	P	P	P	P	P	P	201541_s_at	8.04174	7.82221	7.50579	8.46645	8.60623	8.90744	7.84647	8.04067	8.14278
219544_at	g13376190	79866	BORA	bora, aurora kinase A activator	Narrow: FDR p<0.05, |FC|>1.55 for rho(0αKG)/rho(0CTL)	0.866	1.8226	0.00447	0.04241	-0.354	-1.2781	0.15845	0.347586	-1.219	-2.32785	0.0005	0.044873	219544_at	P	P	P	P	P	P	P	P	P	219544_at	8.61246	8.75738	8.26491	9.10382	9.19738	9.93094	8.21229	8.33879	8.02257
229298_at	Hs.46601.0	84078	KBTBD7	kelch repeat and BTB (POZ) domain containing 7	Narrow: FDR p<0.05, |FC|>1.55 for rho(0αKG)/rho(0CTL)	0.865	1.82134	0.00032	0.008901	-0.296	-1.22774	0.08529	0.236344	-1.161	-2.23612	3e-05	0.015324	229298_at	P	P	P	P	P	P	P	P	P	229298_at	7.49889	7.5263	7.3115	8.0751	8.46207	8.39457	7.2744	7.25658	6.91636
204274_at	Hs.9222.0	9166	EBAG9	estrogen receptor binding site associated, antigen, 9	Dampen: FDR p>0.05, |FC|>1.55 for rho(0αKG)/rho(0CTL)	0.861	1.8163	0.00382	0.038569	0.144	1.10496	0.5328	0.712429	-0.716	-1.64262	0.01055	0.18395	204274_at	P	P	P	P	P	P	P	P	P	204274_at	9.17109	9.63835	9.57555	10.7	10.4389	9.82829	9.68021	9.62757	9.51023
212239_at	Hs.6241.0	5295	PIK3R1	phosphoinositide-3-kinase, regulatory subunit 1 (alpha)	Dampen: FDR p>0.05, |FC|>1.55 for rho(0αKG)/rho(0CTL)	0.861	1.8163	0.00179	0.024185	-0.047	-1.03311	0.81696	0.901891	-0.907	-1.87514	0.00127	0.068629	212239_at	P	P	P	P	P	P	P	P	P	212239_at	8.12339	8.08483	8.31123	8.99584	9.4593	8.64597	8.02661	8.2765	8.07585
223590_at	g12052982	90592	ZNF700	zinc finger protein 700	Dampen: FDR p>0.05, |FC|>1.55 for rho(0αKG)/rho(0CTL)	0.86	1.81504	0.00099	0.017072	0.204	1.15189	0.28377	0.493049	-0.656	-1.57571	0.00528	0.134928	223590_at	A	P	P	P	P	P	P	P	A	223590_at	5.44719	5.86384	6.06497	6.653	6.44422	6.85966	6.07342	6.04907	5.86671
214826_at	Hs.307238.0	201626	PDE12	phosphodiesterase 12	Dampen: FDR p>0.05, |FC|>1.55 for rho(0αKG)/rho(0CTL)	0.859	1.81378	0.00248	0.029595	-0.04	-1.02811	0.85079	0.922185	-0.899	-1.86477	0.00186	0.08179	214826_at	P	P	P	P	P	P	P	P	P	214826_at	7.34103	7.41666	7.673	8.39093	8.74055	7.87614	7.36114	7.42424	7.52527
201380_at	g5453600	10491	CRTAP	cartilage associated protein	Dampen: FDR p>0.05, |FC|>1.55 for rho(0αKG)/rho(0CTL)	0.858	1.81252	0.00244	0.029357	0.113	1.08147	0.59744	0.759657	-0.745	-1.67597	0.0056	0.13836	201380_at	P	P	P	P	P	P	P	P	P	201380_at	8.89296	9.01143	9.40994	10.2308	10.1051	9.55254	9.28127	9.31782	9.05335
205448_s_at	g5454183	7786	MAP3K12	mitogen-activated protein kinase kinase kinase 12	Dampen: FDR p>0.05, |FC|>1.55 for rho(0αKG)/rho(0CTL)	0.858	1.81252	0.00415	0.040538	0.172	1.12662	0.4641	0.658973	-0.686	-1.60882	0.01384	0.208336	205448_s_at	P	P	P	P	P	P	P	P	P	205448_s_at	7.86516	8.15298	8.64073	9.01929	9.43968	8.77389	8.29943	8.51356	8.36181
242138_at	Hs.302685.0	1745	DLX1	distal-less homeobox 1	Narrow: FDR p<0.05, |FC|>1.55 for rho(0αKG)/rho(0CTL)	0.85	1.8025	0.00045	0.010757	-0.337	-1.26313	0.06156	0.192958	-1.186	-2.27521	4e-05	0.015847	242138_at	P	P	P	P	P	P	P	P	P	242138_at	10.475	10.1281	10.7293	11.2371	11.3798	11.2641	10.1832	10.1415	9.99698
224446_at	g13543703	84298	LLPH	LLP homolog, long-term synaptic facilitation (Aplysia)	Dampen: FDR p>0.05, |FC|>1.55 for rho(0αKG)/rho(0CTL)	0.849	1.80125	0.0007	0.013956	0.099	1.07103	0.56966	0.740624	-0.75	-1.68179	0.00159	0.074849	224446_at	P	P	P	P	P	P	P	P	P	224446_at	9.08257	9.19391	8.95696	9.86236	9.7844	10.1337	9.29587	9.38397	8.85131
207590_s_at	g5803018	2491	CENPI	centromere protein I	Dampen: FDR p>0.05, |FC|>1.55 for rho(0αKG)/rho(0CTL)	0.834	1.78262	0.00186	0.024808	0.187	1.13839	0.35362	0.561864	-0.647	-1.56591	0.00824	0.164455	207590_s_at	P	P	P	P	P	P	P	P	P	207590_s_at	7.55355	6.94936	7.15562	8.15587	7.94249	8.06199	7.73191	7.27426	7.21456
225156_at	Hs.326422.0	84337	ELOF1	ELF1 homolog, elongation factor 1	Dampen: FDR p>0.05, |FC|>1.55 for rho(0αKG)/rho(0CTL)	0.831	1.77892	0.00051	0.011612	0.137	1.09962	0.40602	0.608721	-0.693	-1.61664	0.00172	0.077888	225156_at	P	P	P	P	P	P	P	P	P	225156_at	9.81515	9.48994	9.20171	10.2644	10.4372	10.297	9.58303	9.68968	9.6456
202094_at	Hs.1578.0	332	BIRC5	baculoviral IAP repeat containing 5	Narrow: FDR p<0.05, |FC|>1.55 for rho(0αKG)/rho(0CTL)	0.827	1.77399	0.00114	0.018599	-0.174	-1.12818	0.34974	0.558451	-1.001	-2.00139	0.00031	0.036344	202094_at	P	P	P	P	P	P	P	P	P	202094_at	7.19719	6.73967	7.26282	7.85724	7.79402	8.02897	7.06115	6.63402	6.98314
212023_s_at	Hs.80976.1	4288	MKI67	marker of proliferation Ki-67	Dampen: FDR p>0.05, |FC|>1.55 for rho(0αKG)/rho(0CTL)	0.822	1.76786	0.00237	0.028798	-0.05	-1.03526	0.80381	0.894386	-0.872	-1.8302	0.00163	0.075846	212023_s_at	P	P	P	P	P	P	P	P	P	212023_s_at	9.35852	8.53602	9.05272	9.91237	9.6761	9.82349	8.83884	9.04522	8.91256
213912_at	Hs.11912.0	23329	TBC1D30	TBC1 domain family, member 30	Dampen: FDR p>0.05, |FC|>1.55 for rho(0αKG)/rho(0CTL)	0.822	1.76786	0.00514	0.046024	0.088	1.0629	0.70388	0.83204	-0.734	-1.66324	0.00953	0.176288	213912_at	P	P	P	P	P	P	P	P	P	213912_at	6.04296	5.48628	6.10895	6.63053	7.10873	6.36377	5.87277	6.10895	5.91966
1559170_at	Hs2.364456.1	440482	ANKRD20A5P	ankyrin repeat domain 20 family, member A5, pseudogene	Dampen: FDR p>0.05, |FC|>1.55 for rho(0αKG)/rho(0CTL)	0.815	1.7593	0.00078	0.014877	0.001	1.00069	0.99493	0.99754	-0.814	-1.75808	0.00079	0.055482	1559170_at	P	P	P	P	P	P	P	P	P	1559170_at	6.81146	6.70606	6.99084	7.9254	7.45371	7.57314	6.61424	6.99084	6.90649
229494_s_at	Hs.154036.1	7262	PHLDA2	pleckstrin homology-like domain, family A, member 2	Dampen: FDR p>0.05, |FC|>1.55 for rho(0αKG)/rho(0CTL)	0.815	1.7593	0.00075	0.014563	0.164	1.12039	0.34086	0.549889	-0.651	-1.57026	0.00319	0.105614	229494_s_at	P	P	P	P	P	P	P	P	P	229494_s_at	9.51558	9.67428	9.98374	10.5501	10.758	10.3099	9.79697	9.86529	10.0037
222029_x_at	Hs.205736.1	10471	PFDN6	prefoldin subunit 6	Dampen: FDR p>0.05, |FC|>1.55 for rho(0αKG)/rho(0CTL)	0.813	1.75686	0.00059	0.012679	0.049	1.03455	0.76172	0.868348	-0.764	-1.69819	0.0009	0.059027	222029_x_at	P	P	P	P	P	P	P	P	P	222029_x_at	7.93216	8.1618	8.31502	8.77688	8.82463	9.24765	8.18426	8.21821	8.15398
233588_x_at	Hs.205736.3	10471	PFDN6	prefoldin subunit 6	Dampen: FDR p>0.05, |FC|>1.55 for rho(0αKG)/rho(0CTL)	0.812	1.75564	0.00114	0.018593	0.066	1.04681	0.71358	0.838638	-0.746	-1.67714	0.00196	0.083	233588_x_at	P	P	P	P	P	P	P	P	P	233588_x_at	7.77861	7.77642	7.97774	8.46189	8.46209	9.04412	7.98342	7.77412	7.9718
228820_at	Hs.97635.0	63929	XPNPEP3	X-prolyl aminopeptidase 3, mitochondrial	Narrow: FDR p<0.05, |FC|>1.55 for rho(0αKG)/rho(0CTL)	0.812	1.75564	3e-05	0.002431	-0.078	-1.05555	0.48103	0.672505	-0.89	-1.85318	2e-05	0.010866	228820_at	P	P	P	P	P	P	P	P	P	228820_at	6.95711	7.15732	6.98055	7.88344	7.84533	7.80269	6.97846	6.97638	6.90519
216860_s_at	Hs.34941.2	10220	GDF11	growth differentiation factor 11	Dampen: FDR p>0.05, |FC|>1.55 for rho(0αKG)/rho(0CTL)	0.811	1.75443	0.00026	0.007817	0.172	1.12662	0.24734	0.454043	-0.639	-1.55725	0.00133	0.070162	216860_s_at	P	P	P	P	P	P	P	P	P	216860_s_at	7.48576	7.30979	7.24515	8.01784	8.39084	8.06524	7.61772	7.39587	7.54419
209406_at	g4322819	9532	BAG2	BCL2-associated athanogene 2	Dampen: FDR p>0.05, |FC|>1.55 for rho(0αKG)/rho(0CTL)	0.808	1.75078	0.00079	0.014945	-0.026	-1.01819	0.87784	0.937402	-0.834	-1.78262	0.00063	0.050154	209406_at	P	P	P	P	P	P	P	P	P	209406_at	8.52104	8.49307	8.85996	9.42843	9.19277	9.67819	8.7463	8.54965	8.50083
221258_s_at	g13654289	81930	KIF18A	kinesin family member 18A	Narrow: FDR p<0.05, |FC|>1.55 for rho(0αKG)/rho(0CTL)	0.8	1.7411	0.00093	0.016458	-0.105	-1.07549	0.53928	0.717342	-0.905	-1.87254	0.00039	0.041021	221258_s_at	P	P	P	P	P	P	P	P	P	221258_s_at	8.42217	8.30862	8.59984	9.08048	9.11424	9.53568	8.54721	8.29549	8.1717
234863_x_at	Hs.272027.1	26271	FBXO5	F-box protein 5	Dampen: FDR p>0.05, |FC|>1.55 for rho(0αKG)/rho(0CTL)	0.798	1.73869	0.00274	0.031583	-0.037	-1.02598	0.85486	0.924633	-0.834	-1.78262	0.00207	0.084802	234863_x_at	P	P	P	P	P	P	P	P	P	234863_x_at	9.66675	9.07587	9.55091	10.2287	9.96407	10.494	9.56643	9.24098	9.37593
225823_at	Hs.10453.0	125988	C19orf70	chromosome 19 open reading frame 70	Dampen: FDR p>0.05, |FC|>1.55 for rho(0αKG)/rho(0CTL)	0.789	1.72788	0.00113	0.018495	0.097	1.06955	0.57857	0.747222	-0.692	-1.61552	0.0026	0.095158	225823_at	P	P	P	P	P	P	P	P	P	225823_at	7.42694	7.22942	7.16527	7.78225	8.23367	8.17338	7.13943	7.38693	7.58558
1553787_at	Hs2.351133.1	219833	C11orf45	chromosome 11 open reading frame 45	Narrow: FDR p<0.05, |FC|>1.55 for rho(0αKG)/rho(0CTL)	0.784	1.7219	0.00227	0.02804	-0.38	-1.30134	0.07129	0.211632	-1.164	-2.24078	0.00015	0.02775	1553787_at	P	P	P	P	P	P	P	P	P	1553787_at	6.12825	5.59854	5.87313	6.88363	6.7713	6.29682	5.46545	5.43355	5.56019
214957_at	Hs.2149.0	81569	ACTL8	actin-like 8	Dampen: FDR p>0.05, |FC|>1.55 for rho(0αKG)/rho(0CTL)	0.78	1.71713	0.0005	0.011429	0.125	1.09051	0.41722	0.618457	-0.655	-1.57462	0.00163	0.075809	214957_at	A	A	A	A	A	A	A	A	A	214957_at	6.19902	6.27752	6.544	7.35846	7.04984	6.95318	6.55923	6.44981	6.38744
211774_s_at	g13543966	25974	MMACHC	methylmalonic aciduria (cobalamin deficiency) cblC type, with homocystinuria	Dampen: FDR p>0.05, |FC|>1.55 for rho(0αKG)/rho(0CTL)	0.78	1.71713	0.00049	0.011293	0.139	1.10114	0.36871	0.575567	-0.641	-1.55941	0.00182	0.080747	211774_s_at	P	P	P	P	P	P	P	P	P	211774_s_at	8.04752	7.8415	8.04757	8.86598	8.94027	8.46913	8.1887	8.12395	8.04058
228301_x_at	Hs.198274.1	4716	NDUFB10	NADH dehydrogenase (ubiquinone) 1 beta subcomplex, 10, 22kDa	Dampen: FDR p>0.05, |FC|>1.55 for rho(0αKG)/rho(0CTL)	0.766	1.70055	0.0038	0.038357	0.129	1.09354	0.52948	0.709914	-0.636	-1.55401	0.01055	0.183983	228301_x_at	P	P	P	P	P	P	P	P	P	228301_x_at	10.6262	10.9431	10.798	11.4094	11.2599	11.995	10.7509	10.9333	11.0709
221069_s_at	g7705952	51204	TACO1	translational activator of mitochondrially encoded cytochrome c oxidase I	Narrow: FDR p<0.05, |FC|>1.55 for rho(0αKG)/rho(0CTL)	0.756	1.6888	0.00014	0.00555	0.072	1.05117	0.56399	0.736837	-0.685	-1.6077	0.00029	0.035522	221069_s_at	P	P	P	P	P	P	P	P	P	221069_s_at	9.92091	9.90691	9.68333	10.6592	10.6309	10.4901	9.81121	9.91152	10.0033
240616_at	Hs.285896.0	105370333	LOC105370333	uncharacterized LOC105370333	Dampen: FDR p>0.05, |FC|>1.55 for rho(0αKG)/rho(0CTL)	0.743	1.67365	0.00355	0.036691	0.073	1.0519	0.71038	0.836403	-0.67	-1.59107	0.0064	0.146891	240616_at	A	P	P	P	P	P	P	P	P	240616_at	7.14353	7.37478	7.21156	7.87173	7.65394	8.43211	7.23382	7.33927	7.37478
1554768_a_at	Hs2.79078.2	4085	MAD2L1	MAD2 mitotic arrest deficient-like 1 (yeast)	Dampen: FDR p>0.05, |FC|>1.55 for rho(0αKG)/rho(0CTL)	0.728	1.65634	0.00376	0.03813	-0.006	-1.00417	0.97568	0.988017	-0.734	-1.66324	0.00358	0.110946	1554768_a_at	P	P	P	P	P	P	P	P	P	1554768_a_at	8.37584	7.71975	8.32297	8.9221	8.89989	8.78015	8.32297	8.13996	7.93799
38918_at	4854816_RC	9580	SOX13	SRY box 13	Narrow: FDR p<0.05, |FC|>1.55 for rho(0αKG)/rho(0CTL)	0.726	1.65405	0.00209	0.026649	-0.243	-1.18345	0.18686	0.38447	-0.969	-1.95748	0.0003	0.036113	38918_at	P	P	P	P	P	P	P	A	A	38918_at	6.05845	6.12636	6.06368	6.53329	6.96973	6.92396	6.15117	5.64229	5.72617
200676_s_at	g4507788	7332	UBE2L3	ubiquitin conjugating enzyme E2L 3	Narrow: FDR p<0.05, |FC|>1.55 for rho(0αKG)/rho(0CTL)	0.724	1.65176	0.00387	0.038848	-0.42	-1.33793	0.05189	0.172823	-1.144	-2.20993	0.00018	0.029391	200676_s_at	P	P	P	P	P	P	P	P	P	200676_s_at	6.55164	6.87741	7.04909	7.27377	7.75684	7.61939	6.6584	6.23526	6.32374
208751_at	g12654654	8775	NAPA	N-ethylmaleimide-sensitive factor attachment protein, alpha	Narrow: FDR p<0.05, |FC|>1.55 for rho(0αKG)/rho(0CTL)	0.723	1.65061	0.00125	0.019594	-0.112	-1.08073	0.49038	0.680174	-0.836	-1.78509	0.00047	0.044096	208751_at	A	A	P	P	P	P	A	A	A	208751_at	5.1524	5.11851	5.35267	5.61174	6.08184	6.10007	5.066	5.00993	5.21043
201376_s_at	Hs.808.0	3185	HNRNPF	heterogeneous nuclear ribonucleoprotein F	Dampen: FDR p>0.05, |FC|>1.55 for rho(0αKG)/rho(0CTL)	0.718	1.6449	0.00499	0.04523	-0.02	-1.01396	0.9192	0.95918	-0.738	-1.66786	0.00425	0.120855	201376_s_at	P	P	P	P	P	P	P	P	P	201376_s_at	10.8198	10.6055	10.2549	11.44	11.4113	10.9817	10.7439	10.5568	10.3187
203625_x_at	Hs.23348.0	6502	SKP2	S-phase kinase-associated protein 2, E3 ubiquitin protein ligase	Narrow: FDR p<0.05, |FC|>1.55 for rho(0αKG)/rho(0CTL)	0.699	1.62338	0.00145	0.021309	-0.4	-1.31951	0.02936	0.119395	-1.098	-2.14058	6e-05	0.019134	203625_x_at	P	P	P	P	P	P	P	P	P	203625_x_at	11.2366	10.7358	10.7311	11.5908	11.7005	11.5083	10.4167	10.5614	10.5263
201700_at	g4502618	896	CCND3	cyclin D3	Dampen: FDR p>0.05, |FC|>1.55 for rho(0αKG)/rho(0CTL)	0.697	1.62113	0.00207	0.026486	-0.045	-1.03168	0.78883	0.885114	-0.741	-1.67133	0.00139	0.071253	201700_at	P	P	P	P	P	P	P	P	P	201700_at	10.0279	9.44011	9.5092	10.2942	10.4324	10.3402	9.53197	9.59107	9.71934
209565_at	g12654052	7737	RNF113A	ring finger protein 113A	Dampen: FDR p>0.05, |FC|>1.55 for rho(0αKG)/rho(0CTL)	0.696	1.62001	0.00229	0.028156	-0.11	-1.07923	0.52269	0.704774	-0.806	-1.74836	0.00089	0.058323	209565_at	P	P	P	P	P	P	P	P	P	209565_at	9.47488	9.80731	9.47585	10.3141	9.99567	10.5351	9.45225	9.37916	9.59698
231839_at	Hs.151293.0	201626	PDE12	phosphodiesterase 12	Dampen: FDR p>0.05, |FC|>1.55 for rho(0αKG)/rho(0CTL)	0.694	1.61776	0.00198	0.025826	-0.063	-1.04464	0.70435	0.832303	-0.757	-1.68997	0.00113	0.065287	231839_at	P	P	P	P	P	P	P	P	P	231839_at	10.3796	10.436	10.535	11.2698	11.2571	10.9051	10.5794	10.4825	10.0994
222121_at	Hs.240845.1	26084	ARHGEF26	Rho guanine nucleotide exchange factor 26	Narrow: FDR p<0.05, |FC|>1.55 for rho(0αKG)/rho(0CTL)	0.694	1.61776	0.00053	0.011885	-0.196	-1.14552	0.17144	0.364373	-0.89	-1.85318	9e-05	0.022747	222121_at	P	P	P	P	P	P	P	P	A	222121_at	6.15114	6.06493	5.9228	6.6657	6.60956	6.9456	5.91038	5.73017	5.90909
217959_s_at	g7706666	51399	TRAPPC4	trafficking protein particle complex 4	Dampen: FDR p>0.05, |FC|>1.55 for rho(0αKG)/rho(0CTL)	0.69	1.61328	0.00053	0.011864	0.036	1.02527	0.79192	0.886976	-0.654	-1.57352	0.00076	0.054356	217959_s_at	P	P	P	P	P	P	P	P	P	217959_s_at	8.54635	8.97217	8.76619	9.50518	9.45072	9.39892	8.70731	8.86821	8.81624
1566208_at	Hs2.376360.1	6917	TCEA1	transcription elongation factor A (SII), 1	Dampen: FDR p>0.05, |FC|>1.55 for rho(0αKG)/rho(0CTL)	0.686	1.60882	0.00488	0.044672	-0.216	-1.16151	0.27402	0.482579	-0.902	-1.86865	0.00089	0.058421	1566208_at	A	A	A	M	P	P	A	A	A	1566208_at	4.70756	4.83473	4.43191	5.36059	5.25446	5.41793	4.41027	4.80388	4.11329
202139_at	g4502020	8574	AKR7A2	aldo-keto reductase family 7, member A2	Dampen: FDR p>0.05, |FC|>1.55 for rho(0αKG)/rho(0CTL)	0.674	1.59549	0.00168	0.023291	-0.106	-1.07624	0.50469	0.691093	-0.78	-1.71713	0.00064	0.05032	202139_at	P	P	P	P	P	P	P	P	P	202139_at	7.67235	7.80318	7.59015	8.22572	8.27956	8.58166	7.44363	7.47238	7.832
214516_at	Hs.143080.0	8366	HIST1H4B	histone cluster 1, H4b	Narrow: FDR p<0.05, |FC|>1.55 for rho(0αKG)/rho(0CTL)	0.674	1.59549	0.00572	0.049042	-0.504	-1.41814	0.02457	0.106306	-1.177	-2.26106	0.00014	0.027336	214516_at	A	M	A	A	A	A	A	A	A	214516_at	7.18953	7.23422	7.41535	7.55924	7.99418	8.30619	6.83484	6.87276	6.62023
235223_at	Hs.203186.0	88745	RRP36	ribosomal RNA processing 36	Dampen: FDR p>0.05, |FC|>1.55 for rho(0αKG)/rho(0CTL)	0.671	1.59218	0.00536	0.047262	-0.155	-1.11342	0.42204	0.622596	-0.826	-1.77276	0.00152	0.073811	235223_at	P	P	P	P	P	P	P	P	P	235223_at	8.23386	7.90218	8.33494	9.09744	8.93464	8.45154	7.95585	8.0521	7.99894
220816_at	g6912347	23566	LPAR3	lysophosphatidic acid receptor 3	Narrow: FDR p<0.05, |FC|>1.55 for rho(0αKG)/rho(0CTL)	0.67	1.59107	0.00164	0.023032	-0.127	-1.09202	0.42074	0.62136	-0.797	-1.73748	0.00051	0.045872	220816_at	P	P	P	P	P	P	P	P	P	220816_at	8.95252	8.93019	8.98655	9.81345	9.72156	9.34288	8.97102	8.64014	8.87627
218112_at	g13027603	65993	MRPS34	mitochondrial ribosomal protein S34	Dampen: FDR p>0.05, |FC|>1.55 for rho(0αKG)/rho(0CTL)	0.667	1.58777	0.00339	0.035686	-0.113	-1.08147	0.52178	0.704143	-0.78	-1.71713	0.00128	0.068629	218112_at	P	P	P	P	P	P	P	P	P	218112_at	9.25409	8.82362	8.97371	9.50125	9.68458	9.8679	8.74608	8.80723	9.15999
211042_x_at	g13623456	4162	MCAM	melanoma cell adhesion molecule	Narrow: FDR p<0.05, |FC|>1.55 for rho(0αKG)/rho(0CTL)	0.657	1.5768	0.00189	0.025056	-0.323	-1.25093	0.06157	0.192958	-0.98	-1.97247	0.00012	0.025022	211042_x_at	P	P	P	P	P	P	P	P	P	211042_x_at	11.0471	10.6055	10.5949	11.4313	11.4517	11.3345	10.2558	10.5329	10.4901
243312_at	Hs.115789.0	51427	ZNF107	zinc finger protein 107	Dampen: FDR p>0.05, |FC|>1.55 for rho(0αKG)/rho(0CTL)	0.652	1.57135	0.00279	0.031883	0.015	1.01045	0.92643	0.962983	-0.637	-1.55509	0.00322	0.106241	243312_at	P	P	P	P	P	P	P	P	P	243312_at	6.86863	6.59269	6.99146	7.66276	7.28107	7.46525	6.8812	6.98499	6.63215
218357_s_at	g6912711	26521	TIMM8B	translocase of inner mitochondrial membrane 8 homolog B (yeast)	Dampen: FDR p>0.05, |FC|>1.55 for rho(0αKG)/rho(0CTL)	0.649	1.56808	0.00097	0.016902	-0.028	-1.0196	0.84046	0.915769	-0.677	-1.59881	0.00073	0.053603	218357_s_at	P	P	P	P	P	P	P	P	P	218357_s_at	10.4188	10.7526	10.741	11.3263	11.227	11.3059	10.4374	10.6748	10.7162
225255_at	Hs.93814.1	51318	MRPL35	mitochondrial ribosomal protein L35	Narrow: FDR p<0.05, |FC|>1.55 for rho(0αKG)/rho(0CTL)	0.634	1.55186	0.0012	0.019163	-0.298	-1.22944	0.05681	0.183279	-0.932	-1.90792	8e-05	0.021893	225255_at	P	P	P	P	P	P	P	P	P	225255_at	7.83507	8.15018	8.15018	8.65271	8.66528	8.72024	7.87245	7.8181	7.55205
227094_at	Hs.11732.0	55526	DHTKD1	dehydrogenase E1 and transketolase domain containing 1	Dampen: FDR p>0.05, |FC|>1.55 for rho(0αKG)/rho(0CTL)	0.633	1.55079	0.00357	0.036853	-0.022	-1.01537	0.89514	0.946549	-0.655	-1.57462	0.00291	0.100429	227094_at	P	P	P	P	P	P	P	P	P	227094_at	8.85311	8.75111	8.77688	9.45175	9.16133	9.66725	8.89562	8.90016	8.51952
211527_x_at	g340300	7422	VEGFA	vascular endothelial growth factor A	Narrow: FDR p<0.05, |FC|>1.55 for rho(0αKG)/rho(0CTL)	-0.633	-1.55079	0.00129	0.019822	0.243	1.18345	0.11137	0.279094	0.875	1.83401	0.00013	0.026398	211527_x_at	P	P	P	P	P	P	P	P	P	211527_x_at	11.8458	11.8458	11.9317	11.3444	11.0347	11.3458	11.9914	12.04	12.3193
224933_s_at	Hs.6685.0	221037	JMJD1C	jumonji domain containing 1C	Dampen: FDR p>0.05, |FC|>1.55 for rho(0αKG)/rho(0CTL)	-0.639	-1.55725	0.00225	0.027901	0.089	1.06363	0.57147	0.741894	0.728	1.65634	0.00097	0.06115	224933_s_at	P	P	P	P	P	P	P	P	P	224933_s_at	11.9764	11.6889	11.5066	11.1963	11.0065	11.0525	11.9709	11.825	11.6425
228135_at	Hs.26226.0	148423	C1orf52	chromosome 1 open reading frame 52	Dampen: FDR p>0.05, |FC|>1.55 for rho(0αKG)/rho(0CTL)	-0.64	-1.55833	0.00266	0.031037	0.026	1.01819	0.87087	0.933423	0.666	1.58667	0.00208	0.084802	228135_at	P	P	P	P	P	P	P	P	P	228135_at	11.4546	11.7877	11.305	11.0011	10.6766	10.9483	11.5954	11.6091	11.4209
1555608_at	Hs2.234355.3	65981	CAPRIN2	caprin family member 2	Narrow: FDR p<0.05, |FC|>1.55 for rho(0αKG)/rho(0CTL)	-0.654	-1.57352	0.00053	0.011878	-0.012	-1.00835	0.92688	0.963263	0.642	1.56049	0.0006	0.048583	1555608_at	P	P	P	P	P	P	P	P	P	1555608_at	9.9831	10.1788	9.92262	9.42814	9.26359	9.43163	9.92262	10.1602	9.96641
217168_s_at	Hs.146393.1	9709	HERPUD1	homocysteine-inducible, endoplasmic reticulum stress-inducible, ubiquitin-like domain member 1	Narrow: FDR p<0.05, |FC|>1.55 for rho(0αKG)/rho(0CTL)	-0.655	-1.57462	0.00084	0.015487	0.104	1.07475	0.4556	0.651628	0.759	1.69232	0.0003	0.036113	217168_s_at	P	P	P	P	P	P	P	P	P	217168_s_at	11.4012	11.4823	11.6965	10.9894	10.7793	10.8449	11.728	11.4527	11.7113
239006_at	Hs.150178.0	115111	SLC26A7	solute carrier family 26 (anion exchanger), member 7	Narrow: FDR p<0.05, |FC|>1.55 for rho(0αKG)/rho(0CTL)	-0.657	-1.5768	0.00283	0.032103	0.241	1.18181	0.17032	0.36287	0.898	1.86348	0.00036	0.039321	239006_at	P	P	P	A	A	A	P	P	M	239006_at	3.29346	3.38081	3.61487	2.74716	2.73606	2.83452	3.34393	3.89651	3.77099
226056_at	Hs.300670.0	57514	ARHGAP31	Rho GTPase activating protein 31	Dampen: FDR p>0.05, |FC|>1.55 for rho(0αKG)/rho(0CTL)	-0.658	-1.57789	0.00278	0.031852	-0.014	-1.00975	0.93357	0.966524	0.644	1.56266	0.00316	0.105097	226056_at	P	P	P	P	P	P	P	P	P	226056_at	7.78967	8.0272	7.92558	7.11709	7.05133	7.59969	7.78379	7.95971	7.95746
215987_at	Hs.154545.1	9693	RAPGEF2	Rap guanine nucleotide exchange factor 2	Dampen: FDR p>0.05, |FC|>1.55 for rho(0αKG)/rho(0CTL)	-0.66	-1.58008	0.00499	0.04523	0.234	1.17609	0.2221	0.426135	0.894	1.85832	0.00074	0.053851	215987_at	P	P	P	P	P	P	P	P	P	215987_at	9.06844	8.5304	8.72532	8.00487	7.90911	8.43155	9.0389	9.02601	8.96177
203879_at	g2317893	5293	PIK3CD	phosphatidylinositol-4,5-bisphosphate 3-kinase, catalytic subunit delta	Narrow: FDR p<0.05, |FC|>1.55 for rho(0αKG)/rho(0CTL)	-0.661	-1.58118	0.00088	0.015845	0.673	1.59438	0.00078	0.011522	1.335	2.52275	0	0.005808	203879_at	P	P	P	P	P	P	P	P	P	203879_at	10.6976	10.7798	10.3791	9.82014	10.0738	9.97822	11.3309	11.2806	11.2652
1555474_at	Hs2Affx.1.326	26140	TTLL3	tubulin tyrosine ligase-like family member 3	Dampen: FDR p>0.05, |FC|>1.55 for rho(0αKG)/rho(0CTL)	-0.662	-1.58227	0.00475	0.043966	0.144	1.10496	0.4395	0.638146	0.806	1.74836	0.00143	0.07163	1555474_at	P	P	P	P	P	P	P	P	P	1555474_at	7.5455	7.45391	7.26352	6.40433	6.82612	7.04515	7.38594	7.62746	7.68083
223826_s_at	g12053254	57589	RIC1	RIC1 homolog, RAB6A GEF complex partner 1	Narrow: FDR p<0.05, |FC|>1.55 for rho(0αKG)/rho(0CTL)	-0.665	-1.58557	0.00045	0.010767	0.01	1.00696	0.93842	0.968894	0.674	1.59549	0.00041	0.04145	223826_s_at	P	P	P	P	P	P	P	P	P	223826_s_at	7.33836	7.52331	7.21849	6.6159	6.73398	6.73657	7.26058	7.49024	7.35879
225764_at	Hs.146381.2	2120	ETV6	ets variant 6	Narrow: FDR p<0.05, |FC|>1.55 for rho(0αKG)/rho(0CTL)	-0.669	-1.58997	0.00269	0.031269	0.309	1.23885	0.09116	0.246325	0.978	1.96973	0.00021	0.030993	225764_at	P	P	P	P	P	P	P	P	P	225764_at	8.86007	8.59974	9.21774	8.28988	8.31152	8.06894	9.1519	9.18264	9.26887
228111_s_at	Hs.9740.0	25981	DNAH1	dynein, axonemal, heavy chain 1	Dampen: FDR p>0.05, |FC|>1.55 for rho(0αKG)/rho(0CTL)	-0.67	-1.59107	0.00417	0.0407	0.159	1.11651	0.38841	0.593019	0.83	1.77769	0.0011	0.064442	228111_s_at	P	P	A	A	A	A	A	P	A	228111_s_at	7.90523	8.23873	7.66275	7.47845	7.22232	7.09537	7.91406	8.15844	8.21237
225133_at	Hs.94881.0	51274	KLF3	Kruppel-like factor 3 (basic)	Narrow: FDR p<0.05, |FC|>1.55 for rho(0αKG)/rho(0CTL)	-0.672	-1.59328	0.00167	0.023232	0.482	1.39668	0.01131	0.064398	1.154	2.2253	3e-05	0.015229	225133_at	P	P	P	P	P	P	P	P	P	225133_at	8.97329	8.89311	9.22055	8.49153	8.4579	8.12224	9.55363	9.63666	9.34225
238715_at	Hs.117853.0	646014	LOC646014	uncharacterized LOC646014	Narrow: FDR p<0.05, |FC|>1.55 for rho(0αKG)/rho(0CTL)	-0.677	-1.59881	0.00064	0.013254	0.287	1.2201	0.05812	0.185769	0.964	1.95071	5e-05	0.017661	238715_at	P	P	P	A	A	A	P	P	P	238715_at	8.21025	8.27495	8.16514	7.61829	7.4339	7.56694	8.61267	8.63904	8.26047
222235_s_at	Hs.287761.0	55454	CSGALNACT2	chondroitin sulfate N-acetylgalactosaminyltransferase 2	Dampen: FDR p>0.05, |FC|>1.55 for rho(0αKG)/rho(0CTL)	-0.686	-1.60882	0.00568	0.048806	0.039	1.0274	0.84104	0.916013	0.725	1.6529	0.00413	0.119005	222235_s_at	P	P	P	P	P	P	P	P	P	222235_s_at	10.9265	11.3669	11.6111	10.6677	10.5566	10.6231	11.5714	11.36	11.0908
210513_s_at	g5901560	7422	VEGFA	vascular endothelial growth factor A	Dampen: FDR p>0.05, |FC|>1.55 for rho(0αKG)/rho(0CTL)	-0.693	-1.61664	0.00552	0.048073	0.279	1.21335	0.17736	0.372049	0.972	1.96156	0.00066	0.050901	210513_s_at	P	P	P	P	P	P	P	P	P	210513_s_at	11.6963	11.2192	11.1799	10.8865	10.3907	10.74	11.5806	11.4936	11.8595
230891_at	Hs.34851.1	51175	TUBE1	tubulin, epsilon 1	Narrow: FDR p<0.05, |FC|>1.55 for rho(0αKG)/rho(0CTL)	-0.695	-1.61888	0.00585	0.049708	0.848	1.8	0.00178	0.019634	1.543	2.914	2e-05	0.013234	230891_at	P	P	P	P	P	P	P	P	P	230891_at	9.4913	9.74057	9.86379	8.94444	8.73265	9.33334	10.5982	10.7656	10.2761
203301_s_at	g10863946	9988	DMTF1	cyclin D binding myb-like transcription factor 1	Dampen: FDR p>0.05, |FC|>1.55 for rho(0αKG)/rho(0CTL)	-0.696	-1.62001	0.00288	0.032452	0.031	1.02172	0.86221	0.928293	0.727	1.65519	0.00221	0.088287	203301_s_at	P	P	P	P	P	P	P	P	P	203301_s_at	10.1516	10.0527	10.0318	9.32321	9.20671	9.61704	10.1304	10.3957	9.8019
227988_s_at	Hs.65919.0	23230	VPS13A	vacuolar protein sorting 13 homolog A (S. cerevisiae)	Narrow: FDR p<0.05, |FC|>1.55 for rho(0αKG)/rho(0CTL)	-0.697	-1.62113	0.00097	0.016909	0.054	1.03814	0.71865	0.842024	0.751	1.68296	0.00058	0.048284	227988_s_at	P	P	P	P	P	P	P	P	P	227988_s_at	9.87493	9.81989	10.0801	9.27451	9.41657	8.99209	9.84156	10.0713	10.0237
209907_s_at	g7329075	50618	ITSN2	intersectin 2	Dampen: FDR p>0.05, |FC|>1.55 for rho(0αKG)/rho(0CTL)	-0.7	-1.6245	0.00283	0.032119	-0.064	-1.04536	0.72039	0.842839	0.637	1.55509	0.00496	0.13078	209907_s_at	P	P	P	P	P	P	P	P	P	209907_s_at	7.53502	8.1471	8.03229	7.11118	7.23326	7.26886	7.65641	7.92716	7.94006
243619_at	Hs.269069.0	26127	FGFR1OP2	FGFR1 oncogene partner 2	Narrow: FDR p<0.05, |FC|>1.55 for rho(0αKG)/rho(0CTL)	-0.703	-1.62789	0.00189	0.025067	0.621	1.53794	0.00405	0.033395	1.324	2.50359	2e-05	0.012247	243619_at	P	P	P	P	P	P	P	P	P	243619_at	6.92602	7.17431	6.92504	6.29105	6.42059	6.20365	7.78563	7.80481	7.29658
202079_s_at	Hs.6705.0	22906	TRAK1	trafficking protein, kinesin binding 1	Narrow: FDR p<0.05, |FC|>1.55 for rho(0αKG)/rho(0CTL)	-0.711	-1.63694	0.00042	0.010523	0.402	1.32134	0.01352	0.072296	1.113	2.16295	1e-05	0.010642	202079_s_at	P	P	P	P	P	P	P	P	P	202079_s_at	9.19522	9.30949	9.19447	8.3389	8.54874	8.67783	9.61709	9.78761	9.49979
226179_at	Hs.34549.0	51312	SLC25A37	solute carrier family 25 (mitochondrial iron transporter), member 37	Dampen: FDR p>0.05, |FC|>1.55 for rho(0αKG)/rho(0CTL)	-0.72	-1.64718	0.00292	0.032674	-0.087	-1.06216	0.63792	0.788421	0.634	1.55186	0.00616	0.144568	226179_at	P	P	P	P	P	P	P	P	P	226179_at	12.7796	12.7952	13.0351	12.3991	12.2938	11.7557	12.8536	12.8425	12.6537
201473_at	g4504808	3726	JUNB	jun B proto-oncogene	Dampen: FDR p>0.05, |FC|>1.55 for rho(0αKG)/rho(0CTL)	-0.721	-1.64832	0.00426	0.04121	-0.029	-1.0203	0.88181	0.939509	0.692	1.61552	0.0054	0.136372	201473_at	P	P	P	P	P	P	P	P	P	201473_at	9.22591	9.39276	8.77499	8.21092	8.30508	8.71589	9.00616	9.14273	9.15769
202080_s_at	g7662457	22906	TRAK1	trafficking protein, kinesin binding 1	Narrow: FDR p<0.05, |FC|>1.55 for rho(0αKG)/rho(0CTL)	-0.723	-1.65061	0.00227	0.02804	0.262	1.19914	0.1608	0.350553	0.985	1.97931	0.00028	0.035082	202080_s_at	P	P	P	P	P	P	P	P	P	202080_s_at	9.17983	9.7052	9.76409	8.75107	9.032	8.69645	9.7903	9.79711	9.84836
223027_at	Hs.7905.0	51429	SNX9	sorting nexin 9	Dampen: FDR p>0.05, |FC|>1.55 for rho(0αKG)/rho(0CTL)	-0.725	-1.6529	0.00168	0.023267	0.028	1.0196	0.86936	0.93241	0.753	1.68529	0.00132	0.069648	223027_at	P	P	P	P	P	P	P	P	P	223027_at	9.8593	10.1087	10.4111	9.47297	9.16897	9.56246	10.1758	10.1626	10.1239
225864_at	Hs.49136.0	157638	FAM84B	family with sequence similarity 84, member B	Narrow: FDR p<0.05, |FC|>1.55 for rho(0αKG)/rho(0CTL)	-0.725	-1.6529	0.00026	0.007874	0.129	1.09354	0.32687	0.536218	0.854	1.80751	8e-05	0.021893	225864_at	P	P	P	P	P	P	P	P	P	225864_at	10.1398	9.88253	9.95754	9.12762	9.40278	9.27554	10.1682	10.1742	10.0254
213146_at	Hs.103915.0	23135	KDM6B	lysine (K)-specific demethylase 6B	Narrow: FDR p<0.05, |FC|>1.55 for rho(0αKG)/rho(0CTL)	-0.746	-1.67714	0.00049	0.01124	0.739	1.66902	0.00052	0.008971	1.485	2.79917	0	0.005172	213146_at	P	P	P	P	P	P	P	P	P	213146_at	9.49191	9.46621	9.11746	8.68195	8.57126	8.58323	10.0622	9.9633	10.2669
203502_at	g4502444	669	BPGM	2,3-bisphosphoglycerate mutase	Narrow: FDR p<0.05, |FC|>1.55 for rho(0αKG)/rho(0CTL)	-0.748	-1.67946	0.00516	0.046125	0.838	1.78757	0.00264	0.025384	1.587	3.00424	3e-05	0.013418	203502_at	P	P	P	P	P	P	P	P	P	203502_at	8.93163	9.08424	9.5614	8.17347	8.41347	8.7454	10.0356	10.195	9.86195
220924_s_at	g9506836	54407	SLC38A2	solute carrier family 38, member 2	Narrow: FDR p<0.05, |FC|>1.55 for rho(0αKG)/rho(0CTL)	-0.748	-1.67946	0.00025	0.00769	0.037	1.02598	0.77649	0.877813	0.786	1.72429	0.00017	0.028739	220924_s_at	P	P	P	P	P	P	P	P	P	220924_s_at	13.6384	13.416	13.5428	12.9196	12.8169	12.6159	13.6243	13.6451	13.44
218041_x_at	g8924006	54407	SLC38A2	solute carrier family 38, member 2	Narrow: FDR p<0.05, |FC|>1.55 for rho(0αKG)/rho(0CTL)	-0.766	-1.70055	0.00013	0.005339	0.049	1.03455	0.69255	0.824766	0.815	1.7593	8e-05	0.021989	218041_x_at	P	P	P	P	P	P	P	P	P	218041_x_at	13.5661	13.4017	13.4512	12.8323	12.7335	12.5557	13.5883	13.5641	13.4136
218456_at	g12965192	65981	CAPRIN2	caprin family member 2	Dampen: FDR p>0.05, |FC|>1.55 for rho(0αKG)/rho(0CTL)	-0.774	-1.71	0.00045	0.010765	-0.063	-1.04464	0.6722	0.810914	0.711	1.63694	0.00081	0.056128	218456_at	P	P	P	P	P	P	P	P	P	218456_at	11.6546	11.9892	11.5843	11.0181	10.8327	11.0559	11.6452	11.8238	11.5705
1558620_at	Hs2.297013.1	285268	ZNF621	zinc finger protein 621	Dampen: FDR p>0.05, |FC|>1.55 for rho(0αKG)/rho(0CTL)	-0.783	-1.72071	0.00114	0.018631	0.012	1.00835	0.9449	0.971834	0.795	1.73508	0.00104	0.062902	1558620_at	P	P	P	P	P	P	P	P	P	1558620_at	10.5266	10.5033	10.3186	9.88466	9.77835	9.33632	10.422	10.6473	10.3148
204799_at	g7662217	9889	ZBED4	zinc finger, BED-type containing 4	Dampen: FDR p>0.05, |FC|>1.55 for rho(0αKG)/rho(0CTL)	-0.787	-1.72548	0.00059	0.012709	-0.086	-1.06142	0.58497	0.751289	0.701	1.62563	0.0013	0.068958	204799_at	P	P	P	P	P	P	P	P	P	204799_at	9.17035	9.2674	9.51418	8.43782	8.74995	8.40359	9.35271	9.29618	9.04441
209566_at	Hs.7089.0	51141	INSIG2	insulin induced gene 2	Dampen: FDR p>0.05, |FC|>1.55 for rho(0αKG)/rho(0CTL)	-0.802	-1.74352	0.00082	0.015308	-0.08	-1.05702	0.63483	0.786234	0.722	1.64947	0.00164	0.076108	209566_at	P	P	P	P	P	P	P	P	P	209566_at	10.4434	10.3134	9.92088	9.47801	9.43373	9.35926	10.1445	9.9478	10.3453
1557366_at	Hs2.399769.1	284047	CCDC144B	coiled-coil domain containing 144B (pseudogene)	Dampen: FDR p>0.05, |FC|>1.55 for rho(0αKG)/rho(0CTL)	-0.819	-1.76418	0.0008	0.015031	-0.155	-1.11342	0.3743	0.580199	0.664	1.58447	0.00305	0.103441	1557366_at	P	P	P	P	P	P	P	P	P	1557366_at	10.0277	10.3197	10.0241	9.55006	9.27302	9.09261	9.93757	10.1855	9.78477
207603_at	g4507028	9497	SLC4A7	solute carrier family 4, sodium bicarbonate cotransporter, member 7	Dampen: FDR p>0.05, |FC|>1.55 for rho(0αKG)/rho(0CTL)	-0.829	-1.77645	0.00113	0.018501	-0.024	-1.01677	0.89419	0.945996	0.805	1.74715	0.00137	0.070904	207603_at	P	P	P	P	P	P	P	P	P	207603_at	8.34329	8.64519	7.90898	7.52275	7.37534	7.51344	8.21113	8.27149	8.34246
227383_at	Hs.36475.0	727820	LOC727820	uncharacterized LOC727820	Dampen: FDR p>0.05, |FC|>1.55 for rho(0αKG)/rho(0CTL)	-0.831	-1.77892	0.00065	0.013404	-0.077	-1.05482	0.64617	0.79423	0.754	1.68646	0.00125	0.068025	227383_at	P	P	P	P	P	P	P	P	P	227383_at	10.0402	9.78431	10.0191	9.34634	8.83634	9.16731	9.79692	10.0692	9.74548
243051_at	Hs.164002.0	29097	CNIH4	cornichon family AMPA receptor auxiliary protein 4	Dampen: FDR p>0.05, |FC|>1.55 for rho(0αKG)/rho(0CTL)	-0.832	-1.78015	0.00027	0.008148	-0.179	-1.1321	0.24698	0.45365	0.653	1.57243	0.00145	0.072152	243051_at	P	P	A	A	P	A	P	A	A	243051_at	6.40781	6.01024	6.02868	5.26181	5.47459	5.21554	5.85748	6.02469	6.02857
208892_s_at	g13111942	1848	DUSP6	dual specificity phosphatase 6	Dampen: FDR p>0.05, |FC|>1.55 for rho(0αKG)/rho(0CTL)	-0.834	-1.78262	0.00386	0.03877	-0.153	-1.11188	0.49689	0.685506	0.681	1.60325	0.01171	0.193304	208892_s_at	P	P	P	P	P	P	P	P	P	208892_s_at	12.9839	13.0953	12.2659	12.053	12.0221	11.7673	12.7959	12.613	12.4773
212171_x_at	Hs.73793.2	7422	VEGFA	vascular endothelial growth factor A	Narrow: FDR p<0.05, |FC|>1.55 for rho(0αKG)/rho(0CTL)	-0.837	-1.78633	9e-05	0.004216	0.047	1.03311	0.71619	0.840437	0.883	1.84421	6e-05	0.019134	212171_x_at	P	P	P	P	P	P	P	P	P	212171_x_at	9.84057	9.48013	9.72336	8.8619	8.92048	8.75145	9.69055	9.73158	9.76153
221763_at	Hs.6685.0	221037	JMJD1C	jumonji domain containing 1C	Narrow: FDR p<0.05, |FC|>1.55 for rho(0αKG)/rho(0CTL)	-0.839	-1.78881	0.00067	0.013601	0.123	1.089	0.47438	0.667391	0.962	1.94801	0.00025	0.033185	221763_at	P	P	P	P	P	P	P	P	P	221763_at	11.2552	11.1925	11.0584	10.3113	10.5837	10.0955	11.3642	11.475	11.0364
230559_x_at	Hs.124442.0	121512	FGD4	FYVE, RhoGEF and PH domain containing 4	Dampen: FDR p>0.05, |FC|>1.55 for rho(0αKG)/rho(0CTL)	-0.845	-1.79626	0.00413	0.040432	0.036	1.02527	0.87529	0.935936	0.881	1.84165	0.00324	0.106504	230559_x_at	P	P	P	P	P	P	P	P	P	230559_x_at	7.20699	6.89951	6.94702	5.71927	6.63544	6.16266	7.255	6.98705	6.91875
218145_at	g11056039	57761	TRIB3	tribbles pseudokinase 3	Dampen: FDR p>0.05, |FC|>1.55 for rho(0αKG)/rho(0CTL)	-0.846	-1.79751	0.00175	0.023849	-0.106	-1.07624	0.59567	0.758594	0.74	1.67018	0.00396	0.116538	218145_at	P	P	P	P	P	P	P	P	P	218145_at	8.53955	9.01518	8.74961	7.78498	7.95371	8.02679	8.47433	8.4565	9.0557
203950_s_at	g4502872	1185	CLCN6	chloride channel, voltage-sensitive 6	Dampen: FDR p>0.05, |FC|>1.55 for rho(0αKG)/rho(0CTL)	-0.853	-1.80625	0.00045	0.010767	-0.083	-1.05922	0.61409	0.772035	0.771	1.70645	0.00091	0.059099	203950_s_at	P	P	P	P	P	P	P	P	P	203950_s_at	12.0331	11.7413	11.6061	10.9886	11.0507	10.781	11.501	11.7279	11.903
207563_s_at	g2266993	8473	OGT	O-linked N-acetylglucosamine (GlcNAc) transferase	Dampen: FDR p>0.05, |FC|>1.55 for rho(0αKG)/rho(0CTL)	-0.857	-1.81127	0.00036	0.009486	-0.074	-1.05263	0.64221	0.791501	0.783	1.72071	0.00067	0.051239	207563_s_at	P	P	P	P	P	P	P	P	P	207563_s_at	11.2624	11.1903	11.2647	10.5944	10.5188	10.0317	11.2355	11.1172	11.1423
236557_at	Hs.186838.0	253461	ZBTB38	zinc finger and BTB domain containing 38	Dampen: FDR p>0.05, |FC|>1.55 for rho(0αKG)/rho(0CTL)	-0.86	-1.81504	0.00383	0.038627	-0.201	-1.14949	0.38881	0.593356	0.658	1.57789	0.01599	0.223034	236557_at	P	P	P	A	A	A	P	P	A	236557_at	8.61756	8.58422	8.85742	8.25211	7.94613	7.28204	8.46661	8.43938	8.5492
222999_s_at	g12005729	81669	CCNL2	cyclin L2	Dampen: FDR p>0.05, |FC|>1.55 for rho(0αKG)/rho(0CTL)	-0.862	-1.81756	0.0012	0.019163	-0.033	-1.02314	0.86052	0.927283	0.828	1.77522	0.00156	0.074525	222999_s_at	P	P	P	P	P	P	P	P	P	222999_s_at	12.4498	12.3077	12.3482	11.8282	11.6029	11.09	12.1842	12.3502	12.471
1554316_at	Hs2.351865.1	25796	PGLS	6-phosphogluconolactonase	Dampen: FDR p>0.05, |FC|>1.55 for rho(0αKG)/rho(0CTL)	-0.862	-1.81756	0.00076	0.014614	-0.086	-1.06142	0.6303	0.783159	0.776	1.71238	0.00152	0.073748	1554316_at	P	P	P	P	P	A	P	P	P	1554316_at	7.50535	7.60546	7.064	6.3874	6.7795	6.4233	7.1961	7.33862	7.38206
233076_at	Hs.106254.0	282973	JAKMIP3	Janus kinase and microtubule interacting protein 3	Dampen: FDR p>0.05, |FC|>1.55 for rho(0αKG)/rho(0CTL)	-0.864	-1.82008	0.00093	0.016456	-0.208	-1.15509	0.27312	0.481835	0.656	1.57571	0.00513	0.133265	233076_at	P	P	P	A	A	P	P	P	P	233076_at	6.73218	7.00957	6.49671	5.83713	5.6145	6.1947	6.49671	6.57112	6.54589
237439_at	Hs.23935.0	124739	USP43	ubiquitin specific peptidase 43	Narrow: FDR p<0.05, |FC|>1.55 for rho(0αKG)/rho(0CTL)	-0.871	-1.82893	0.00031	0.008737	0.424	1.34164	0.02217	0.099506	1.295	2.45377	1e-05	0.010866	237439_at	P	P	P	P	P	P	P	P	P	237439_at	9.95325	10.0206	10.2444	9.14045	9.14336	9.32193	10.4513	10.2703	10.7697
244377_at	Hs.184513.0	6509	SLC1A4	solute carrier family 1 (glutamate/neutral amino acid transporter), member 4	Narrow: FDR p<0.05, |FC|>1.55 for rho(0αKG)/rho(0CTL)	-0.882	-1.84293	0.00404	0.039783	0.411	1.32961	0.10787	0.273842	1.293	2.45037	0.00033	0.037642	244377_at	P	P	P	A	A	P	P	P	P	244377_at	6.82687	6.72777	6.71931	5.3989	6.41366	5.81601	7.28883	6.96579	7.25198
209240_at	Hs.100293.1	8473	OGT	O-linked N-acetylglucosamine (GlcNAc) transferase	Narrow: FDR p<0.05, |FC|>1.55 for rho(0αKG)/rho(0CTL)	-0.884	-1.84548	0.00011	0.004947	0.028	1.0196	0.84089	0.915961	0.912	1.88165	9e-05	0.022747	209240_at	P	P	P	P	P	P	P	P	P	209240_at	12.8803	12.7793	13.0049	12.2091	11.9577	11.8452	12.9352	13.0298	12.7836
223028_s_at	g13477130	51429	SNX9	sorting nexin 9	Narrow: FDR p<0.05, |FC|>1.55 for rho(0αKG)/rho(0CTL)	-0.908	-1.87644	3e-05	0.002476	-0.108	-1.07773	0.38872	0.593317	0.799	1.73989	9e-05	0.022747	223028_s_at	P	P	P	P	P	P	P	P	P	223028_s_at	10.1743	10.2189	10.2553	9.22204	9.18478	9.51864	10.115	10.0997	10.1088
225390_s_at	Hs.7104.3	51621	KLF13	Kruppel-like factor 13	Dampen: FDR p>0.05, |FC|>1.55 for rho(0αKG)/rho(0CTL)	-0.91	-1.87905	0.00054	0.012037	-0.159	-1.11651	0.38428	0.589427	0.751	1.68296	0.00194	0.082855	225390_s_at	P	P	P	P	P	P	P	P	P	225390_s_at	9.84687	10.2653	10.5035	9.21878	9.23753	9.42815	9.921	10.0272	10.1904
225295_at	Hs.24936.0	57181	SLC39A10	solute carrier family 39 (zinc transporter), member 10	Dampen: FDR p>0.05, |FC|>1.55 for rho(0αKG)/rho(0CTL)	-0.91	-1.87905	0.00066	0.013577	-0.244	-1.18427	0.20553	0.406748	0.666	1.58667	0.00479	0.128321	225295_at	P	P	P	P	P	P	P	P	P	225295_at	12.1509	11.7082	11.3979	10.9013	10.8956	10.729	11.5546	11.4851	11.4844
228754_at	Hs.296770.0	6533	SLC6A6	solute carrier family 6 (neurotransmitter transporter), member 6	Dampen: FDR p>0.05, |FC|>1.55 for rho(0αKG)/rho(0CTL)	-0.91	-1.87905	0.00096	0.016834	-0.199	-1.1479	0.31909	0.528254	0.71	1.6358	0.0045	0.124117	228754_at	P	P	P	P	P	P	P	P	P	228754_at	12.6962	12.1743	12.0543	11.4119	11.594	11.1902	11.9432	12.22	12.1642
212225_at	Hs.150580.2	10209	EIF1	eukaryotic translation initiation factor 1	Narrow: FDR p<0.05, |FC|>1.55 for rho(0αKG)/rho(0CTL)	-0.917	-1.88818	0.00126	0.01963	0.114	1.08222	0.57879	0.747393	1.031	2.04344	0.00057	0.047894	212225_at	P	P	P	P	P	P	P	P	P	212225_at	9.46192	8.65839	8.95346	8.18043	8.23475	7.90844	9.05562	9.22983	9.13092
207604_s_at	g4507028	9497	SLC4A7	solute carrier family 4, sodium bicarbonate cotransporter, member 7	Dampen: FDR p>0.05, |FC|>1.55 for rho(0αKG)/rho(0CTL)	-0.919	-1.8908	0.00084	0.01548	0.014	1.00975	0.94201	0.970501	0.933	1.90924	0.00076	0.054245	207604_s_at	P	P	P	P	P	P	P	P	P	207604_s_at	12.1603	12.3399	11.633	11.0424	11.1084	11.2258	12.0536	11.8866	12.2349
1557293_at	Hs2.337635.1	440993	LINC00969	long intergenic non-protein coding RNA 969	Narrow: FDR p<0.05, |FC|>1.55 for rho(0αKG)/rho(0CTL)	-0.923	-1.89605	0.0007	0.013917	0.14	1.10191	0.46327	0.658288	1.063	2.08927	0.00026	0.033432	1557293_at	P	P	P	P	P	P	P	P	P	1557293_at	8.24405	8.727	8.60228	7.8466	7.56648	7.39144	8.72273	8.84821	8.42227
229787_s_at	Hs.100293.3	8473	OGT	O-linked N-acetylglucosamine (GlcNAc) transferase	Narrow: FDR p<0.05, |FC|>1.55 for rho(0αKG)/rho(0CTL)	-0.924	-1.89737	7e-05	0.003681	-0.049	-1.03455	0.72241	0.843965	0.875	1.83401	0.0001	0.023654	229787_s_at	P	P	P	P	P	P	P	P	P	229787_s_at	12.3974	12.3127	12.4598	11.6638	11.3237	11.4119	12.4123	12.4362	12.1757
1568868_at	Hs2.407639.1	339761	CYP27C1	cytochrome P450, family 27, subfamily C, polypeptide 1	Dampen: FDR p>0.05, |FC|>1.55 for rho(0αKG)/rho(0CTL)	-0.928	-1.90264	0.00254	0.030126	-0.006	-1.00417	0.97886	0.989659	0.922	1.89474	0.00265	0.095554	1568868_at	P	P	P	P	P	P	P	P	P	1568868_at	7.49972	7.29434	8.06065	6.5869	6.49506	6.9895	7.37819	7.63326	7.82495
202778_s_at	g4508010	7750	ZMYM2	zinc finger, MYM-type 2	Dampen: FDR p>0.05, |FC|>1.55 for rho(0αKG)/rho(0CTL)	-0.928	-1.90264	0.00524	0.046591	-0.149	-1.1088	0.57086	0.741425	0.779	1.71594	0.0133	0.204445	202778_s_at	P	P	P	P	P	P	P	P	P	202778_s_at	11.1739	10.9386	11.1881	9.65228	10.0578	10.8064	10.9832	11.0214	10.8489
213306_at	Hs.169378.1	8777	MPDZ	multiple PDZ domain protein	Dampen: FDR p>0.05, |FC|>1.55 for rho(0αKG)/rho(0CTL)	-0.929	-1.90396	0.0002	0.006829	-0.191	-1.14155	0.24629	0.452866	0.738	1.66786	0.00101	0.062389	213306_at	P	P	P	P	P	P	P	P	P	213306_at	10.3558	10.5092	10.3399	9.56409	9.69367	9.15909	10.1246	10.1692	10.3371
235105_at	Hs.182585.0	80306	MED28	mediator complex subunit 28	Narrow: FDR p<0.05, |FC|>1.55 for rho(0αKG)/rho(0CTL)	-0.935	-1.91189	6e-05	0.003345	-0.207	-1.15429	0.1509	0.337341	0.729	1.65749	0.00037	0.039727	235105_at	P	P	P	P	P	P	P	P	P	235105_at	8.60422	8.45721	8.31677	7.65257	7.54237	7.37732	8.21591	8.39232	8.14981
235252_at	Hs.169061.0	8844	KSR1	kinase suppressor of ras 1	Dampen: FDR p>0.05, |FC|>1.55 for rho(0αKG)/rho(0CTL)	-0.937	-1.91454	0.0034	0.035712	-0.2	-1.1487	0.42161	0.622237	0.737	1.66671	0.01268	0.200583	235252_at	P	P	P	P	P	P	P	P	P	235252_at	9.01467	9.32066	9.65985	8.0853	8.1804	8.91717	9.08681	9.2283	9.08
202479_s_at	g12803604	28951	TRIB2	tribbles pseudokinase 2	Dampen: FDR p>0.05, |FC|>1.55 for rho(0αKG)/rho(0CTL)	-0.937	-1.91454	0.00335	0.035429	-0.111	-1.07998	0.65082	0.796943	0.826	1.77276	0.00689	0.15162	202479_s_at	P	P	P	P	P	P	P	P	P	202479_s_at	10.5847	10.9391	10.6702	10.1707	10.0057	9.20605	10.7564	10.5062	10.5988
234967_at	Hs.283974.0	3572	IL6ST	interleukin 6 signal transducer	Narrow: FDR p<0.05, |FC|>1.55 for rho(0αKG)/rho(0CTL)	-0.939	-1.9172	0.00232	0.028351	0.421	1.33886	0.09215	0.247772	1.361	2.56863	0.00018	0.029391	234967_at	P	P	P	P	P	P	P	P	P	234967_at	9.10037	8.37363	8.24288	7.68667	7.80214	7.40962	8.84509	9.00148	9.13463
1554736_at	Hs2.70983.2	9411	ARHGAP29	Rho GTPase activating protein 29	Dampen: FDR p>0.05, |FC|>1.55 for rho(0αKG)/rho(0CTL)	-0.948	-1.9292	0.00473	0.043936	0.123	1.089	0.64028	0.790246	1.07	2.09943	0.00228	0.08992	1554736_at	P	P	P	P	P	P	P	P	P	1554736_at	7.76985	8.18678	7.65402	6.63879	6.69399	7.4353	8.11685	8.22343	7.63897
232648_at	Hs.270791.0	5684	PSMA3	proteasome subunit alpha 3	Dampen: FDR p>0.05, |FC|>1.55 for rho(0αKG)/rho(0CTL)	-0.959	-1.94396	0.00185	0.02476	-0.003	-1.00208	0.99089	0.995835	0.956	1.93992	0.00188	0.082218	232648_at	P	P	P	P	P	P	P	P	P	232648_at	10.9073	11.0022	10.8518	10.2509	10.1223	9.51107	11.0479	11.1536	10.552
215512_at	Hs.20141.1	10299	MARCH6	membrane associated ring finger 6	Dampen: FDR p>0.05, |FC|>1.55 for rho(0αKG)/rho(0CTL)	-0.963	-1.94936	0.00205	0.026305	-0.185	-1.13682	0.43071	0.630153	0.778	1.71475	0.00718	0.154755	215512_at	P	P	P	P	P	P	P	P	P	215512_at	10.6796	10.017	9.77342	9.3759	9.12078	9.08323	9.94274	10.1666	9.80444
213792_s_at	Hs.89695.2	3643	INSR	insulin receptor	Narrow (marginal): FDR p<0.05, |FC|<1.55 for rho(0αKG)/rho(0CTL)	-0.964	-1.95071	1e-05	0.001097	-0.334	-1.2605	0.01185	0.066391	0.63	1.54756	0.00022	0.031718	213792_s_at	P	P	P	P	P	P	P	P	P	213792_s_at	10.9606	11.0071	11.1293	10.1345	10.0301	10.0409	10.7528	10.6299	10.7122
208161_s_at	g9955971	8714	ABCC3	ATP binding cassette subfamily C member 3	Narrow: FDR p<0.05, |FC|>1.55 for rho(0αKG)/rho(0CTL)	-0.973	-1.96292	0.00363	0.037271	0.499	1.41323	0.07653	0.221163	1.472	2.77406	0.00023	0.031728	208161_s_at	P	P	P	P	P	A	P	P	P	208161_s_at	8.37314	8.16834	7.67688	7.15476	7.54375	6.6015	8.51376	8.55392	8.64713
225288_at	Hs.284394.1	85301	COL27A1	collagen, type XXVII, alpha 1	Dampen: FDR p>0.05, |FC|>1.55 for rho(0αKG)/rho(0CTL)	-0.977	-1.96837	0.00325	0.03486	-0.214	-1.1599	0.40553	0.608193	0.763	1.69702	0.0127	0.200628	225288_at	P	P	P	P	P	P	P	P	P	225288_at	10.3647	9.36463	9.87337	9.04194	8.60973	9.01999	9.44589	9.81605	9.6974
229939_at	Hs.148355.0	284131	ENDOV	endonuclease V	Dampen: FDR p>0.05, |FC|>1.55 for rho(0αKG)/rho(0CTL)	-0.98	-1.97247	0.00232	0.028388	-0.152	-1.11111	0.53054	0.710802	0.828	1.77522	0.00627	0.145649	229939_at	P	P	P	P	P	P	P	P	P	229939_at	7.67626	8.15628	7.73215	6.4462	7.39637	6.78282	7.63188	7.75097	7.72536
201417_at	Hs.83484.0	6659	SOX4	SRY box 4	Narrow: FDR p<0.05, |FC|>1.55 for rho(0αKG)/rho(0CTL)	-0.98	-1.97247	3e-05	0.002136	-0.288	-1.22095	0.04662	0.161268	0.692	1.61552	0.00036	0.039459	201417_at	P	P	P	P	P	P	P	P	P	201417_at	11.8756	11.5735	11.8881	10.866	10.7534	10.7768	11.4455	11.5978	11.4301
234474_x_at	Hs.283974.0	3572	IL6ST	interleukin 6 signal transducer	Dampen: FDR p>0.05, |FC|>1.55 for rho(0αKG)/rho(0CTL)	-0.986	-1.98069	0.00568	0.0488	0.252	1.19086	0.3792	0.584679	1.238	2.35871	0.00143	0.07163	234474_x_at	P	P	P	P	P	P	P	P	P	234474_x_at	9.31055	8.57878	8.51424	7.93777	8.21847	7.29013	8.90188	9.1067	9.15241
228793_at	Hs.6685.1	221037	JMJD1C	jumonji domain containing 1C	Dampen: FDR p>0.05, |FC|>1.55 for rho(0αKG)/rho(0CTL)	-0.998	-1.99723	0.00564	0.048603	0.255	1.19334	0.37969	0.585076	1.253	2.38337	0.00142	0.07163	228793_at	P	P	P	P	P	P	P	P	P	228793_at	7.3647	7.72544	6.56591	6.44757	6.03425	6.18057	7.48035	7.705	7.23559
1558529_s_at	Hs2.367706.1	105379555	LOC105379555	uncharacterized LOC105379555	Dampen: FDR p>0.05, |FC|>1.55 for rho(0αKG)/rho(0CTL)	-1.004	-2.00555	0.00225	0.027874	-0.326	-1.25353	0.20377	0.404862	0.678	1.59992	0.01908	0.240873	1558529_s_at	P	P	P	P	P	P	P	P	P	1558529_s_at	6.90052	7.77989	7.04285	6.49138	6.19217	6.02779	6.69521	6.95614	7.0943
239864_at	Hs.188631.0	92482	BBIP1	BBSome interacting protein 1	Narrow: FDR p<0.05, |FC|>1.55 for rho(0αKG)/rho(0CTL)	-1.014	-2.0195	0.00011	0.004846	-0.093	-1.06659	0.56265	0.735941	0.921	1.89343	0.00022	0.031534	239864_at	P	P	P	P	P	P	P	P	P	239864_at	8.60186	8.73796	8.67957	7.44453	7.52204	8.01027	8.59768	8.60823	8.53419
217248_s_at	Hs.22891.3	23428	SLC7A8	solute carrier family 7 (amino acid transporter light chain, L system), member 8	Dampen: FDR p>0.05, |FC|>1.55 for rho(0αKG)/rho(0CTL)	-1.018	-2.02511	0.00046	0.010867	-0.33	-1.25701	0.11616	0.286198	0.688	1.61105	0.00554	0.138108	217248_s_at	P	P	P	P	P	P	P	P	P	217248_s_at	10.3254	10.0304	9.67018	8.96027	9.14177	8.86905	9.56456	9.52482	9.94662
221427_s_at	g13569904	81669	CCNL2	cyclin L2	Dampen: FDR p>0.05, |FC|>1.55 for rho(0αKG)/rho(0CTL)	-1.031	-2.04344	0.00111	0.018284	-0.294	-1.22603	0.21212	0.41422	0.737	1.66671	0.00829	0.164943	221427_s_at	P	P	P	P	P	P	P	P	P	221427_s_at	10.9269	10.5092	10.4964	10.0024	9.70548	9.13285	10.2686	10.3828	10.4
206558_at	g7108363	6493	SIM2	single-minded family bHLH transcription factor 2	Dampen: FDR p>0.05, |FC|>1.55 for rho(0αKG)/rho(0CTL)	-1.032	-2.04486	0.00023	0.007449	-0.327	-1.2544	0.09461	0.251959	0.706	1.63127	0.00296	0.101212	206558_at	P	P	P	P	P	P	P	P	P	206558_at	9.25086	9.56604	9.26819	8.33526	8.64476	8.00814	9.1565	8.99992	8.94889
202478_at	g11056053	28951	TRIB2	tribbles pseudokinase 2	Dampen: FDR p>0.05, |FC|>1.55 for rho(0αKG)/rho(0CTL)	-1.032	-2.04486	0.00085	0.015542	-0.04	-1.02811	0.85385	0.924125	0.992	1.98894	0.0011	0.064442	202478_at	P	P	P	P	P	P	P	P	P	202478_at	11.3268	11.3616	11.291	10.4924	10.6339	9.75799	11.3977	11.2971	11.165
204748_at	g4506264	5743	PTGS2	prostaglandin-endoperoxide synthase 2 (prostaglandin G/H synthase and cyclooxygenase)	Narrow: FDR p<0.05, |FC|>1.55 for rho(0αKG)/rho(0CTL)	-1.035	-2.04911	0.00205	0.026333	1.644	3.12531	8e-05	0.00281	2.679	6.40412	0	0.005172	204748_at	P	P	P	P	P	P	P	P	P	204748_at	11.7918	11.6549	12.6147	11.1136	11.143	10.7008	13.6772	13.6419	13.674
205197_s_at	Hs.606.0	538	ATP7A	ATPase, Cu++ transporting, alpha polypeptide	Narrow: FDR p<0.05, |FC|>1.55 for rho(0αKG)/rho(0CTL)	-1.037	-2.05196	0.00041	0.010315	0.022	1.01537	0.90832	0.953619	1.059	2.08349	0.00035	0.03868	205197_s_at	P	P	P	P	P	P	P	P	P	205197_s_at	8.3412	8.66827	8.6346	7.55897	7.82763	7.14692	8.75738	8.40279	8.55138
223644_s_at	g5639940	1427	CRYGS	crystallin gamma S	Dampen: FDR p>0.05, |FC|>1.55 for rho(0αKG)/rho(0CTL)	-1.045	-2.06337	0.00117	0.018825	-0.357	-1.28076	0.14509	0.329311	0.689	1.61217	0.01317	0.20408	223644_s_at	P	P	P	P	P	M	P	P	P	223644_s_at	7.07063	7.21623	6.60833	5.93848	6.23262	5.58855	6.34433	6.8741	6.60686
227341_at	Hs.12369.0	222389	BEND7	BEN domain containing 7	Narrow: FDR p<0.05, |FC|>1.55 for rho(0αKG)/rho(0CTL)	-1.05	-2.07053	0.00273	0.031564	0.563	1.47734	0.05628	0.182239	1.613	3.05887	0.00015	0.02773	227341_at	P	P	P	P	P	P	P	P	P	227341_at	8.66693	9.10316	9.31099	7.62089	7.73758	8.57115	9.57868	9.51875	9.67139
234689_at	Hs.307116.0	442213	PTCHD4	patched domain containing 4	Dampen: FDR p>0.05, |FC|>1.55 for rho(0αKG)/rho(0CTL)	-1.053	-2.07484	0.00133	0.02016	-0.409	-1.32777	0.10899	0.27562	0.644	1.56266	0.02064	0.249046	234689_at	A	P	P	A	P	A	P	A	A	234689_at	5.27125	6.16574	5.53979	4.72795	4.73469	4.35535	5.45017	5.07191	5.22839
218093_s_at	g8923103	55608	ANKRD10	ankyrin repeat domain 10	Dampen: FDR p>0.05, |FC|>1.55 for rho(0αKG)/rho(0CTL)	-1.054	-2.07628	0.0004	0.01028	-0.317	-1.24574	0.13453	0.313792	0.737	1.66671	0.00412	0.118936	218093_s_at	P	P	P	P	P	P	P	P	P	218093_s_at	10.3817	10.5217	10.5633	9.73779	9.61554	8.95082	10.1382	10.2005	10.1759
240144_at	Hs.202383.0	1773	DNASE1	deoxyribonuclease I	Dampen: FDR p>0.05, |FC|>1.55 for rho(0αKG)/rho(0CTL)	-1.058	-2.08204	7e-05	0.003831	-0.326	-1.25353	0.06208	0.194013	0.732	1.66094	0.00102	0.062835	240144_at	P	P	P	P	P	P	P	P	P	240144_at	9.19188	9.61562	9.53584	8.52293	8.45885	8.18752	9.00434	9.11577	9.24422
225293_at	Hs.284394.1	85301	COL27A1	collagen, type XXVII, alpha 1	Narrow: FDR p<0.05, |FC|>1.55 for rho(0αKG)/rho(0CTL)	-1.058	-2.08204	0.00011	0.005008	-0.215	-1.1607	0.21904	0.422422	0.842	1.79253	0.00059	0.048417	225293_at	P	P	P	P	P	P	P	P	P	225293_at	10.9872	10.4396	10.9057	9.78876	9.61731	9.75382	10.4058	10.6999	10.5811
219280_at	g11321643	54014	BRWD1	bromodomain and WD repeat domain containing 1	Dampen: FDR p>0.05, |FC|>1.55 for rho(0αKG)/rho(0CTL)	-1.081	-2.1155	0.00065	0.013367	-0.395	-1.31494	0.09466	0.252044	0.685	1.6077	0.01022	0.182357	219280_at	P	P	P	P	P	P	P	P	P	219280_at	10.495	10.3329	10.2546	9.01889	8.99594	9.82572	9.93743	9.94578	10.0134
220603_s_at	g8922916	55784	MCTP2	multiple C2 domains, transmembrane 2	Dampen: FDR p>0.05, |FC|>1.55 for rho(0αKG)/rho(0CTL)	-1.088	-2.12579	0.00478	0.0441	-0.288	-1.22095	0.35053	0.559234	0.8	1.7411	0.02297	0.260159	220603_s_at	P	P	P	M	P	P	P	P	P	220603_s_at	6.424	6.73355	7.10772	4.9532	5.90965	6.1374	6.50556	6.42581	6.47032
213159_at	Hs.55947.0	22990	PCNX	pecanex homolog (Drosophila)	Narrow: FDR p<0.05, |FC|>1.55 for rho(0αKG)/rho(0CTL)	-1.089	-2.12727	9e-05	0.004278	-0.245	-1.18509	0.16409	0.354692	0.844	1.79502	0.00056	0.047488	213159_at	P	P	P	P	P	P	P	P	P	213159_at	10.6141	11.0828	10.8202	9.88005	9.88208	9.48808	10.5445	10.5359	10.7007
1557067_s_at	Hs2.398171.1	55692	LUC7L	LUC7-like	Dampen: FDR p>0.05, |FC|>1.55 for rho(0αKG)/rho(0CTL)	-1.09	-2.12874	0.00066	0.013532	-0.398	-1.31768	0.09628	0.254645	0.692	1.61552	0.0103	0.182653	1557067_s_at	P	P	P	P	P	P	P	P	P	1557067_s_at	10.4445	10.3923	9.60435	9.16651	8.89842	9.10548	9.8196	9.76242	9.66581
242785_at	Hs.185155.0	400954	EML6	echinoderm microtubule associated protein like 6	Dampen: FDR p>0.05, |FC|>1.55 for rho(0αKG)/rho(0CTL)	-1.092	-2.13169	0.00213	0.026882	-0.408	-1.32685	0.14592	0.330464	0.684	1.60659	0.02579	0.273041	242785_at	P	P	P	P	P	P	P	P	P	242785_at	8.45088	9.19101	8.23454	7.7295	7.13291	7.73886	8.27874	8.11056	8.26301
205920_at	g4507044	6533	SLC6A6	solute carrier family 6 (neurotransmitter transporter), member 6	Dampen: FDR p>0.05, |FC|>1.55 for rho(0αKG)/rho(0CTL)	-1.092	-2.13169	0.00239	0.028938	-0.409	-1.32777	0.15179	0.33839	0.683	1.60547	0.0281	0.284128	205920_at	P	P	P	P	P	P	P	P	P	205920_at	10.4802	9.85184	9.3432	8.89389	9.00125	8.50489	9.56153	9.45481	9.43207
212944_at	Hs.268016.0	6526	SLC5A3	solute carrier family 5 (sodium/myo-inositol cotransporter), member 3	Dampen: FDR p>0.05, |FC|>1.55 for rho(0αKG)/rho(0CTL)	-1.097	-2.13909	0.00289	0.032463	-0.264	-1.2008	0.35484	0.563055	0.833	1.78139	0.01321	0.20408	212944_at	P	P	P	P	P	P	P	P	P	212944_at	12.7443	12.3973	11.8914	11.4855	11.5653	10.6905	12.0869	12.1935	11.9606
219304_s_at	g13376807	80310	PDGFD	platelet derived growth factor D	Dampen: FDR p>0.05, |FC|>1.55 for rho(0αKG)/rho(0CTL)	-1.101	-2.14503	0.00101	0.017283	-0.409	-1.32777	0.10975	0.276571	0.692	1.61552	0.01489	0.215462	219304_s_at	P	P	P	P	P	P	P	P	P	219304_s_at	6.98169	7.57804	7.6599	6.62994	6.11466	6.17186	7.30153	6.94463	6.74695
211113_s_at	g1314276	9619	ABCG1	ATP binding cassette subfamily G member 1	Dampen: FDR p>0.05, |FC|>1.55 for rho(0αKG)/rho(0CTL)	-1.102	-2.14652	0.00022	0.007226	-0.428	-1.34537	0.04629	0.160583	0.674	1.59549	0.00546	0.137529	211113_s_at	P	P	P	P	P	P	P	P	P	211113_s_at	7.88602	8.64895	8.47222	7.24618	7.32731	7.1275	7.92517	7.88602	7.9115
239477_at	Hs.257224.0	151651	EFHB	EF-hand domain family, member B	Dampen: FDR p>0.05, |FC|>1.55 for rho(0αKG)/rho(0CTL)	-1.11	-2.15846	0.00225	0.027928	-0.475	-1.38992	0.10437	0.268278	0.635	1.55294	0.03909	0.328564	239477_at	A	P	A	A	A	A	A	A	A	239477_at	3.07569	4.248	3.83076	2.39525	2.72913	2.70071	3.37356	3.23993	3.1157
235969_at	Hs.26299.0	6334	SCN8A	sodium channel, voltage gated, type VIII alpha subunit	Dampen: FDR p>0.05, |FC|>1.55 for rho(0αKG)/rho(0CTL)	-1.112	-2.16145	0.00029	0.008452	-0.332	-1.25876	0.1218	0.294766	0.779	1.71594	0.00312	0.104516	235969_at	P	P	P	P	P	P	P	P	P	235969_at	8.13832	8.07717	8.41162	7.18714	7.41327	6.69216	7.89142	8.02958	7.70868
201309_x_at	g1244509	9315	NREP	neuronal regeneration related protein	Narrow: FDR p<0.05, |FC|>1.55 for rho(0αKG)/rho(0CTL)	-1.119	-2.17196	0.00294	0.032798	0.371	1.29325	0.21308	0.415364	1.49	2.80889	0.00045	0.043497	201309_x_at	P	P	P	P	P	P	P	P	P	201309_x_at	11.6739	11.6445	11.7711	11.1747	10.6874	9.86977	12.022	12.2089	11.9721
201310_s_at	g4758865	9315	NREP	neuronal regeneration related protein	Dampen: FDR p>0.05, |FC|>1.55 for rho(0αKG)/rho(0CTL)	-1.12	-2.17347	0.00307	0.033683	0.26	1.19748	0.37605	0.58177	1.38	2.60268	0.00081	0.056128	201310_s_at	P	P	P	P	P	P	P	P	P	201310_s_at	11.7843	11.9351	12.2281	11.2355	11.2247	10.1281	12.1476	12.3023	12.277
208893_s_at	g13477170	1848	DUSP6	dual specificity phosphatase 6	Dampen: FDR p>0.05, |FC|>1.55 for rho(0αKG)/rho(0CTL)	-1.124	-2.1795	0.00328	0.035078	-0.229	-1.17202	0.43979	0.638288	0.895	1.85961	0.01158	0.192051	208893_s_at	P	P	P	P	P	P	P	P	P	208893_s_at	12.5198	12.7357	11.5834	11.2317	11.369	10.8669	12.2391	12.051	11.8624
227223_at	Hs.145696.2	9584	RBM39	RNA binding motif protein 39	Dampen: FDR p>0.05, |FC|>1.55 for rho(0αKG)/rho(0CTL)	-1.126	-2.18253	0.00325	0.03486	-0.31	-1.23971	0.30242	0.512138	0.816	1.76052	0.01818	0.23576	227223_at	P	P	P	P	P	P	P	P	P	227223_at	10.8839	10.6611	10.6687	10.0772	9.9118	8.84728	10.3782	10.5745	10.3316
243254_at	Hs.169541.0	3097	HIVEP2	human immunodeficiency virus type I enhancer binding protein 2	Dampen: FDR p>0.05, |FC|>1.55 for rho(0αKG)/rho(0CTL)	-1.127	-2.18404	0.00026	0.007962	-0.428	-1.34537	0.05539	0.180311	0.699	1.62338	0.00581	0.140575	243254_at	P	P	P	P	P	P	P	P	P	243254_at	8.90142	8.90063	8.40385	7.46564	7.91337	7.44637	8.53915	8.21805	8.16542
219435_at	g13376664	80169	CTC1	CTS telomere maintenance complex component 1	Dampen: FDR p>0.05, |FC|>1.55 for rho(0αKG)/rho(0CTL)	-1.13	-2.18859	0.00014	0.005534	-0.422	-1.33978	0.04226	0.151445	0.707	1.63241	0.00331	0.107788	219435_at	P	P	P	P	P	P	P	P	P	219435_at	8.1318	8.25419	7.83786	6.8041	7.01835	7.01203	7.30227	7.79895	7.85552
232098_at	Hs.287669.0	667	DST	dystonin	Dampen: FDR p>0.05, |FC|>1.55 for rho(0αKG)/rho(0CTL)	-1.133	-2.19314	0.00118	0.019003	-0.3	-1.23114	0.24746	0.454148	0.833	1.78139	0.00752	0.157223	232098_at	P	P	P	P	P	P	P	P	P	232098_at	10.8978	10.3269	10.1276	9.48017	9.44362	9.03028	10.0362	10.5285	9.88722
232038_at	Hs.99016.0	221322	TBC1D32	TBC1 domain family, member 32	Dampen: FDR p>0.05, |FC|>1.55 for rho(0αKG)/rho(0CTL)	-1.138	-2.20076	0.00026	0.007945	-0.378	-1.29954	0.08601	0.237621	0.759	1.69232	0.00381	0.114529	232038_at	P	P	P	P	P	P	P	P	P	232038_at	7.12151	7.68734	7.15844	5.85736	6.29059	6.40668	6.99359	7.02859	6.81045
228758_at	Hs.63920.0	604	BCL6	B-cell CLL/lymphoma 6	Narrow: FDR p<0.05, |FC|>1.55 for rho(0αKG)/rho(0CTL)	-1.15	-2.21914	3e-05	0.002349	-0.24	-1.18099	0.14272	0.325786	0.909	1.87774	0.00019	0.029406	228758_at	P	P	P	P	P	P	P	P	P	228758_at	7.93052	7.55564	7.585	6.51621	6.38697	6.7183	7.38366	7.3608	7.60546
227755_at	Hs.184108.2	2081	ERN1	endoplasmic reticulum to nucleus signaling 1	Narrow: FDR p<0.05, |FC|>1.55 for rho(0αKG)/rho(0CTL)	-1.15	-2.21914	0.00011	0.004833	0.229	1.17202	0.22347	0.427728	1.379	2.60088	3e-05	0.013234	227755_at	P	P	P	P	P	P	P	P	P	227755_at	10.8944	11.4978	11.3483	9.90692	10.1512	10.2329	11.5861	11.5183	11.3244
232589_at	Hs.122810.1	102606465	LOC102606465	uncharacterized LOC102606465	Dampen: FDR p>0.05, |FC|>1.55 for rho(0αKG)/rho(0CTL)	-1.156	-2.22839	0.00237	0.028784	-0.087	-1.06216	0.76022	0.867521	1.069	2.09798	0.0038	0.114405	232589_at	P	P	P	P	P	P	P	P	P	232589_at	7.44872	7.42914	7.29809	5.57945	6.25182	6.87568	7.47729	7.16645	7.27152
1554997_a_at	Hs2.196384.2	5743	PTGS2	prostaglandin-endoperoxide synthase 2 (prostaglandin G/H synthase and cyclooxygenase)	Narrow: FDR p<0.05, |FC|>1.55 for rho(0αKG)/rho(0CTL)	-1.158	-2.23148	0.00365	0.037436	2.282	4.86352	3e-05	0.001601	3.44	10.8528	0	0.005172	1554997_a_at	P	P	P	P	P	P	P	P	P	1554997_a_at	10.3504	9.80713	11.2318	9.26984	9.40318	9.24221	12.8363	12.7405	12.6578
203288_at	g7662075	9710	KIAA0355	KIAA0355	Dampen: FDR p>0.05, |FC|>1.55 for rho(0αKG)/rho(0CTL)	-1.16	-2.23457	0.00064	0.013233	-0.265	-1.20164	0.27223	0.48101	0.895	1.85961	0.00338	0.108536	203288_at	P	P	P	P	P	P	P	P	P	203288_at	9.73882	9.88428	9.59634	8.23215	8.42644	9.08139	9.51754	9.70673	9.20003
219822_at	g4758743	9617	MTRF1	mitochondrial translational release factor 1	Dampen: FDR p>0.05, |FC|>1.55 for rho(0αKG)/rho(0CTL)	-1.163	-2.23923	0.00047	0.011011	-0.524	-1.43794	0.03943	0.144935	0.639	1.55725	0.01654	0.226496	219822_at	P	P	P	P	P	P	P	P	P	219822_at	10.0127	9.88024	9.26463	8.36708	8.39622	8.90513	9.19057	9.12016	9.27571
237741_at	Hs.144130.0	55186	SLC25A36	solute carrier family 25 (pyrimidine nucleotide carrier), member 36	Dampen: FDR p>0.05, |FC|>1.55 for rho(0αKG)/rho(0CTL)	-1.165	-2.24233	0.00325	0.03486	-0.237	-1.17854	0.44028	0.638724	0.929	1.90396	0.01143	0.190894	237741_at	P	P	P	P	P	P	P	P	P	237741_at	10.6911	10.2613	9.73673	9.05128	8.65767	9.48465	10.2354	10.1419	9.6021
207625_s_at	g4826662	9139	CBFA2T2	core-binding factor, runt domain, alpha subunit 2; translocated to, 2	Dampen: FDR p>0.05, |FC|>1.55 for rho(0αKG)/rho(0CTL)	-1.168	-2.247	0.00075	0.014563	-0.457	-1.37268	0.08235	0.231607	0.711	1.63694	0.01411	0.210164	207625_s_at	P	P	P	P	P	P	P	P	P	207625_s_at	9.30809	9.56614	9.61441	7.90195	8.1878	8.89391	9.04902	8.89506	9.17215
1557066_at	Hs2.398171.1	55692	LUC7L	LUC7-like	Dampen: FDR p>0.05, |FC|>1.55 for rho(0αKG)/rho(0CTL)	-1.179	-2.2642	0.0022	0.027484	-0.377	-1.29864	0.20895	0.410938	0.802	1.74352	0.01814	0.235481	1557066_at	P	P	P	P	P	P	P	P	P	1557066_at	9.11997	9.02244	8.14207	7.77239	7.11186	7.8634	8.37007	8.42599	8.35846
233197_at	Hs.175681.0	55958	KLHL9	kelch-like family member 9	Dampen: FDR p>0.05, |FC|>1.55 for rho(0αKG)/rho(0CTL)	-1.187	-2.27679	0.00346	0.0361	-0.416	-1.33422	0.2017	0.402136	0.771	1.70645	0.03095	0.296998	233197_at	P	P	P	P	P	P	P	P	P	233197_at	7.6368	6.91667	6.47705	6.16507	5.93584	5.36938	6.7417	6.6766	6.36549
228593_at	Hs.82646.1	339483	MTMR9LP	myotubularin related protein 9-like, pseudogene	Narrow: FDR p<0.05, |FC|>1.55 for rho(0αKG)/rho(0CTL)	-1.191	-2.28311	0.00055	0.012124	0.177	1.13053	0.45655	0.652238	1.369	2.58291	0.0002	0.030829	228593_at	P	P	P	P	P	P	P	P	P	228593_at	7.79585	7.93951	8.23833	6.619	6.59464	7.18616	7.84398	8.11532	8.54647
1561271_at	Hs2.328147.1	348254	CCDC144CP	coiled-coil domain containing 144C, pseudogene	Dampen: FDR p>0.05, |FC|>1.55 for rho(0αKG)/rho(0CTL)	-1.202	-2.30058	0.00014	0.00561	-0.37	-1.29235	0.08492	0.235744	0.832	1.78015	0.00185	0.081435	1561271_at	P	P	P	P	P	P	P	P	P	1561271_at	9.57595	10.2179	9.98899	8.91311	8.69627	8.56884	9.53851	9.78622	9.34892
229201_at	Hs.13326.0	5063	PAK3	p21 protein (Cdc42/Rac)-activated kinase 3	Dampen: FDR p>0.05, |FC|>1.55 for rho(0αKG)/rho(0CTL)	-1.21	-2.31338	0.00418	0.040759	-0.28	-1.21419	0.40039	0.603523	0.93	1.90528	0.01691	0.228759	229201_at	P	P	P	P	P	P	P	P	P	229201_at	8.27163	8.29864	8.3221	6.71276	6.5685	7.98059	8.02559	8.12817	7.89733
208797_s_at	Hs.182982.0	23015	GOLGA8A	golgin A8 family, member A	Dampen: FDR p>0.05, |FC|>1.55 for rho(0αKG)/rho(0CTL)	-1.214	-2.3198	0.00133	0.020129	-0.406	-1.32501	0.15908	0.348596	0.807	1.74957	0.01384	0.208336	208797_s_at	P	P	P	P	P	P	P	P	P	208797_s_at	11.8677	11.5681	11.7541	11.0711	10.5635	9.91417	11.2374	11.5795	11.1536
229656_s_at	Hs.23017.1	400954	EML6	echinoderm microtubule associated protein like 6	Narrow: FDR p<0.05, |FC|>1.55 for rho(0αKG)/rho(0CTL)	-1.225	-2.33755	2e-05	0.001575	0.132	1.09581	0.38963	0.59411	1.358	2.5633	1e-05	0.007549	229656_s_at	P	P	P	P	P	P	P	P	P	229656_s_at	9.088	9.32636	9.21554	7.73192	8.08494	8.13715	9.30964	9.49729	9.21963
231964_at	Hs.137206.0	636	BICD1	bicaudal D homolog 1 (Drosophila)	Dampen: FDR p>0.05, |FC|>1.55 for rho(0αKG)/rho(0CTL)	-1.238	-2.35871	0.00033	0.009044	-0.592	-1.50733	0.02495	0.107249	0.646	1.56482	0.01672	0.227761	231964_at	P	P	P	P	P	P	P	P	P	231964_at	6.86654	7.55917	7.77962	6.31943	6.13115	6.04062	6.9593	6.76962	6.70046
226450_at	Hs.98401.0	3643	INSR	insulin receptor	Dampen: FDR p>0.05, |FC|>1.55 for rho(0αKG)/rho(0CTL)	-1.241	-2.36362	0.00027	0.00802	-0.595	-1.51047	0.02169	0.098093	0.646	1.56482	0.01477	0.214632	226450_at	P	P	P	P	P	P	P	P	P	226450_at	10.324	10.4418	10.827	9.73501	9.23885	8.8947	9.95754	9.95334	9.89595
212642_s_at	Hs.75063.0	3097	HIVEP2	human immunodeficiency virus type I enhancer binding protein 2	Narrow: FDR p<0.05, |FC|>1.55 for rho(0αKG)/rho(0CTL)	-1.243	-2.3669	0	0.000643	-0.341	-1.26663	0.01955	0.091655	0.902	1.86865	4e-05	0.016159	212642_s_at	P	P	P	P	P	P	P	P	P	212642_s_at	11.108	10.9985	10.8799	9.79926	9.65913	9.79941	10.5793	10.5793	10.8037
205940_at	g11342671	4621	MYH3	myosin, heavy chain 3, skeletal muscle, embryonic	Dampen: FDR p>0.05, |FC|>1.55 for rho(0αKG)/rho(0CTL)	-1.25	-2.37841	0.00069	0.013876	-0.402	-1.32134	0.1387	0.319953	0.848	1.8	0.00753	0.157223	205940_at	P	P	P	P	P	P	P	P	P	205940_at	9.37401	9.24469	8.67585	8.31306	7.80217	7.4298	8.5604	8.72752	8.80165
212641_at	Hs.75063.0	3097	HIVEP2	human immunodeficiency virus type I enhancer binding protein 2	Narrow: FDR p<0.05, |FC|>1.55 for rho(0αKG)/rho(0CTL)	-1.25	-2.37841	0	0.000651	-0.496	-1.4103	0.00273	0.025815	0.753	1.68529	0.00016	0.028132	212641_at	P	P	P	P	P	P	P	P	P	212641_at	7.97406	8.05994	8.1137	6.6159	6.97446	6.80807	7.58286	7.54642	7.52957
216944_s_at	Hs.198443.2	3708	ITPR1	inositol 1,4,5-trisphosphate receptor, type 1	Dampen: FDR p>0.05, |FC|>1.55 for rho(0αKG)/rho(0CTL)	-1.254	-2.38502	0.0007	0.013957	-0.282	-1.21588	0.28652	0.495709	0.973	1.96292	0.00356	0.11092	216944_s_at	P	P	P	P	P	P	P	P	P	216944_s_at	7.61861	7.4006	7.60815	6.76855	6.43876	5.65731	7.32765	7.32765	7.12741
213164_at	Hs.324787.0	6526	SLC5A3	solute carrier family 5 (sodium/myo-inositol cotransporter), member 3	Dampen: FDR p>0.05, |FC|>1.55 for rho(0αKG)/rho(0CTL)	-1.255	-2.38667	0.00042	0.010503	-0.191	-1.14155	0.43095	0.630305	1.065	2.09217	0.00129	0.068915	213164_at	P	P	P	P	P	P	P	P	P	213164_at	13.1664	13.0445	12.4807	11.9352	11.7778	11.2132	12.7669	12.8095	12.5433
1558969_a_at	Hs2.262007.1	132241	RPL32P3	ribosomal protein L32 pseudogene 3	Dampen: FDR p>0.05, |FC|>1.55 for rho(0αKG)/rho(0CTL)	-1.263	-2.39994	0.00246	0.029501	-0.296	-1.22774	0.35496	0.563169	0.967	1.95477	0.01114	0.188789	1558969_a_at	P	P	P	P	P	P	P	P	P	1558969_a_at	6.91063	7.61045	7.14605	6.57856	5.80289	5.49728	6.76374	7.32577	6.68957
213167_s_at	Hs.324787.0	6526	SLC5A3	solute carrier family 5 (sodium/myo-inositol cotransporter), member 3	Dampen: FDR p>0.05, |FC|>1.55 for rho(0αKG)/rho(0CTL)	-1.269	-2.40994	0.00246	0.029451	-0.316	-1.24487	0.32709	0.536402	0.953	1.93589	0.01224	0.197315	213167_s_at	P	P	P	P	P	P	P	P	P	213167_s_at	12.4297	11.9536	11.1918	10.9026	10.6859	10.1797	11.6121	11.6885	11.3267
238890_at	Hs.136470.0	54014	BRWD1	bromodomain and WD repeat domain containing 1	Dampen: FDR p>0.05, |FC|>1.55 for rho(0αKG)/rho(0CTL)	-1.271	-2.41329	0.0002	0.006763	-0.587	-1.50212	0.02124	0.096706	0.685	1.6077	0.01002	0.181093	238890_at	P	P	P	P	P	P	P	P	P	238890_at	8.29433	7.90256	8.44708	7.20482	7.03905	6.5858	7.51506	7.89897	7.4696
227802_at	Hs.35088.0	22902	RUFY3	RUN and FYVE domain containing 3	Narrow: FDR p<0.05, |FC|>1.55 for rho(0αKG)/rho(0CTL)	-1.273	-2.41664	1e-05	0.000866	-0.476	-1.39088	0.006	0.042967	0.797	1.73748	0.00021	0.030993	227802_at	P	P	P	P	P	P	P	P	P	227802_at	9.92876	10.0378	9.76482	8.70149	8.57317	8.6364	9.21982	9.56896	9.51417
225077_at	Hs.166254.2	1106	CHD2	chromodomain helicase DNA binding protein 2	Dampen: FDR p>0.05, |FC|>1.55 for rho(0αKG)/rho(0CTL)	-1.276	-2.42167	0.00162	0.022833	-0.501	-1.41519	0.11491	0.284395	0.775	1.71119	0.02436	0.267103	225077_at	P	P	P	P	P	P	P	P	P	225077_at	9.66903	9.38316	9.52138	7.88225	7.92711	8.93628	8.97144	9.38849	8.71136
212099_at	Hs.204354.0	388	RHOB	ras homolog family member B	Narrow: FDR p<0.05, |FC|>1.55 for rho(0αKG)/rho(0CTL)	-1.277	-2.42335	4e-05	0.002604	-0.01	-1.00696	0.95635	0.977468	1.267	2.40661	4e-05	0.016716	212099_at	P	P	P	P	P	P	P	P	P	212099_at	12.5284	12.7672	12.6692	11.6177	11.4897	11.0278	12.7915	12.6619	12.4825
216959_x_at	Hs.7912.2	4897	NRCAM	neuronal cell adhesion molecule	Dampen: FDR p>0.05, |FC|>1.55 for rho(0αKG)/rho(0CTL)	-1.286	-2.43851	0.00042	0.010524	-0.522	-1.43594	0.05515	0.179828	0.764	1.69819	0.0105	0.183898	216959_x_at	P	P	P	P	P	P	P	P	P	216959_x_at	10.2663	10.8116	10.6287	9.50158	9.59825	8.74991	10.1364	9.86787	10.1361
240011_at	Hs.143011.0	146057	TTBK2	tau tubulin kinase 2	Dampen: FDR p>0.05, |FC|>1.55 for rho(0αKG)/rho(0CTL)	-1.286	-2.43851	0.00047	0.010997	-0.427	-1.34443	0.10934	0.276051	0.859	1.81378	0.00603	0.142988	240011_at	P	P	P	P	P	P	P	P	P	240011_at	7.84898	8.37167	7.86796	6.56042	6.38991	7.28023	7.71178	7.63341	7.46184
228699_at	Hs.17778.4	8828	NRP2	neuropilin 2	Narrow: FDR p<0.05, |FC|>1.55 for rho(0αKG)/rho(0CTL)	-1.299	-2.46058	1e-05	0.000866	-0.56	-1.47427	0.00259	0.025098	0.739	1.66902	0.00041	0.041994	228699_at	P	P	P	P	P	P	P	P	P	228699_at	12.0926	12.0914	12.1478	10.6073	10.7397	11.0884	11.5557	11.5557	11.5402
204491_at	Hs.172081.0	5144	PDE4D	phosphodiesterase 4D, cAMP-specific	Narrow: FDR p<0.05, |FC|>1.55 for rho(0αKG)/rho(0CTL)	-1.3	-2.46229	3e-05	0.002136	-0.372	-1.29415	0.05144	0.171932	0.928	1.90264	0.00034	0.037788	204491_at	P	P	P	P	P	P	P	P	P	204491_at	9.62667	9.29716	9.91824	8.47122	8.31878	8.15196	9.20042	9.27035	9.25567
220623_s_at	g13376857	80705	TSGA10	testis specific 10	Narrow: FDR p<0.05, |FC|>1.55 for rho(0αKG)/rho(0CTL)	-1.306	-2.47255	5e-05	0.003078	-0.346	-1.27103	0.08805	0.240881	0.961	1.94666	0.00049	0.044529	220623_s_at	P	P	P	A	A	A	P	P	P	220623_s_at	5.8729	6.22919	5.69419	4.62867	4.51325	4.73519	5.4317	5.4317	5.89605
1558365_at	Hs2.288933.1	5230	PGK1	phosphoglycerate kinase 1	Dampen: FDR p>0.05, |FC|>1.55 for rho(0αKG)/rho(0CTL)	-1.325	-2.50533	0.00085	0.015653	-0.581	-1.49589	0.06003	0.189736	0.744	1.67481	0.02251	0.25849	1558365_at	P	P	P	P	P	P	P	P	P	1558365_at	10.2203	9.89962	9.18094	8.72289	8.35156	8.25151	9.37431	9.33334	8.84904
240422_at	Hs.116195.0	2330	FMO5	flavin containing monooxygenase 5	Dampen: FDR p>0.05, |FC|>1.55 for rho(0αKG)/rho(0CTL)	-1.329	-2.51228	0.00022	0.007234	-0.65	-1.56917	0.01749	0.085202	0.68	1.60214	0.0141	0.210164	240422_at	P	P	P	A	A	M	A	P	A	240422_at	4.63321	5.0342	4.6551	3.17513	3.71742	3.4417	3.68406	4.41968	4.26924
226404_at	Hs.145696.3	9584	RBM39	RNA binding motif protein 39	Dampen: FDR p>0.05, |FC|>1.55 for rho(0αKG)/rho(0CTL)	-1.33	-2.51403	0.00029	0.008402	-0.369	-1.29146	0.14665	0.331496	0.96	1.94531	0.00257	0.094814	226404_at	P	P	P	P	P	P	P	P	P	226404_at	12.3764	12.0301	11.6961	10.9997	10.7577	10.3553	11.8374	11.8203	11.3365
239313_at	Hs.28846.0	401320	LOC401320	uncharacterized LOC401320	Dampen: FDR p>0.05, |FC|>1.55 for rho(0αKG)/rho(0CTL)	-1.34	-2.53151	0.00267	0.03112	-0.7	-1.6245	0.0607	0.191056	0.64	1.55833	0.08147	0.443642	239313_at	P	P	P	P	P	P	P	P	P	239313_at	6.86774	8.4038	7.76706	6.38449	6.14304	6.49183	6.84127	6.93563	7.16295
209493_at	g12751451	23037	PDZD2	PDZ domain containing 2	Dampen: FDR p>0.05, |FC|>1.55 for rho(0αKG)/rho(0CTL)	-1.342	-2.53503	0.00056	0.012303	-0.459	-1.37459	0.10861	0.275061	0.883	1.84421	0.00757	0.157472	209493_at	P	P	P	P	P	P	P	P	P	209493_at	8.09612	7.29434	8.30181	6.67407	6.79204	6.19987	7.36994	7.45748	7.48792
229435_at	Hs.293854.0	169792	GLIS3	GLIS family zinc finger 3	Dampen: FDR p>0.05, |FC|>1.55 for rho(0αKG)/rho(0CTL)	-1.35	-2.54912	4e-05	0.002555	-0.672	-1.59328	0.00463	0.036459	0.678	1.59992	0.00439	0.123106	229435_at	P	P	P	P	P	P	P	P	P	229435_at	8.62235	8.61907	9.00306	7.08779	7.52848	7.57715	8.13863	8.22237	7.86731
231978_at	Hs.186655.0	219931	TPCN2	two pore segment channel 2	Dampen: FDR p>0.05, |FC|>1.55 for rho(0αKG)/rho(0CTL)	-1.35	-2.54912	0.00031	0.00871	-0.446	-1.36226	0.0939	0.250714	0.903	1.86995	0.00428	0.121256	231978_at	P	P	P	A	A	P	P	P	P	231978_at	8.46449	8.57899	8.08864	6.71009	6.81466	7.55871	7.81691	7.81375	8.1633
226380_at	Hs.8861.0	11099	PTPN21	protein tyrosine phosphatase, non-receptor type 21	Dampen: FDR p>0.05, |FC|>1.55 for rho(0αKG)/rho(0CTL)	-1.354	-2.5562	9e-05	0.00443	-0.524	-1.43794	0.02941	0.119508	0.83	1.77769	0.00273	0.097454	226380_at	P	P	P	P	P	P	P	P	P	226380_at	9.29193	9.70862	9.75075	8.52205	8.35732	7.81002	8.98393	9.00883	9.18521
213359_at	Hs.303627.5	3184	HNRNPD	heterogeneous nuclear ribonucleoprotein D	Dampen: FDR p>0.05, |FC|>1.55 for rho(0αKG)/rho(0CTL)	-1.355	-2.55797	0.00014	0.005597	-0.387	-1.30767	0.10584	0.270641	0.968	1.95613	0.00151	0.073568	213359_at	P	P	P	P	P	P	P	P	P	213359_at	11.5001	10.995	10.7644	9.66543	9.6826	9.84539	10.7799	10.9665	10.3519
216060_s_at	Hs.197751.2	23002	DAAM1	dishevelled associated activator of morphogenesis 1	Narrow: FDR p<0.05, |FC|>1.55 for rho(0αKG)/rho(0CTL)	-1.355	-2.55797	9e-05	0.004261	0.059	1.04174	0.77559	0.877325	1.415	2.6666	6e-05	0.019819	216060_s_at	P	P	P	P	P	P	P	P	P	216060_s_at	8.43974	8.83858	8.95813	7.05506	7.44545	7.66961	8.96204	8.87661	8.57529
206584_at	g7662503	23643	LY96	lymphocyte antigen 96	Dampen: FDR p>0.05, |FC|>1.55 for rho(0αKG)/rho(0CTL)	-1.364	-2.57398	0.00024	0.007542	-0.484	-1.39862	0.06654	0.202598	0.88	1.84038	0.00427	0.12117	206584_at	P	P	P	P	P	P	P	P	P	206584_at	5.93384	6.64482	6.69848	4.96885	4.86272	5.35395	5.73998	5.89815	6.18718
208123_at	g13242171	9312	KCNB2	potassium channel, voltage gated Shab related subfamily B, member 2	Dampen: FDR p>0.05, |FC|>1.55 for rho(0αKG)/rho(0CTL)	-1.365	-2.57576	0.00074	0.014393	-0.393	-1.31312	0.18298	0.379393	0.972	1.96156	0.00608	0.143833	208123_at	P	P	P	A	A	P	P	P	P	208123_at	6.72999	7.89261	7.46327	5.80079	5.86749	6.32256	7.09464	6.90591	6.90591
230424_at	Hs.120969.0	9315	NREP	neuronal regeneration related protein	Narrow: FDR p<0.05, |FC|>1.55 for rho(0αKG)/rho(0CTL)	-1.369	-2.58291	0.00279	0.031883	0.552	1.46612	0.13468	0.314029	1.922	3.78948	0.00029	0.035525	230424_at	P	P	P	P	P	P	P	P	P	230424_at	9.12413	9.05701	8.54011	8.03434	7.91305	6.66546	9.32004	9.61063	9.44697
204567_s_at	g8051574	9619	ABCG1	ATP binding cassette subfamily G member 1	Narrow: FDR p<0.05, |FC|>1.55 for rho(0αKG)/rho(0CTL)	-1.38	-2.60268	4e-05	0.002563	-0.312	-1.24143	0.12374	0.297598	1.068	2.09652	0.00026	0.033508	204567_s_at	P	P	P	P	P	P	P	P	P	204567_s_at	11.2627	12.0487	11.7735	10.3752	10.3221	10.2476	11.4463	11.341	11.3607
231960_at	Hs.172932.0	54014	BRWD1	bromodomain and WD repeat domain containing 1	Dampen: FDR p>0.05, |FC|>1.55 for rho(0αKG)/rho(0CTL)	-1.384	-2.60991	0.00119	0.019092	-0.71	-1.6358	0.0405	0.147344	0.674	1.59549	0.04941	0.361613	231960_at	P	P	P	P	P	P	P	P	P	231960_at	8.7824	8.52986	8.91227	6.68136	7.52219	7.86958	7.97269	8.40407	7.71795
209822_s_at	g437386	7436	VLDLR	very low density lipoprotein receptor	Dampen: FDR p>0.05, |FC|>1.55 for rho(0αKG)/rho(0CTL)	-1.386	-2.61353	0.0002	0.006939	-0.435	-1.35191	0.09225	0.247936	0.951	1.93321	0.00262	0.095388	209822_s_at	P	P	P	P	P	P	P	P	P	209822_s_at	9.47927	10.2692	10.2957	8.6478	8.75511	8.48436	9.39348	9.47927	9.86651
231292_at	Hs.170337.0	493861	EID3	EP300 interacting inhibitor of differentiation 3	Dampen: FDR p>0.05, |FC|>1.55 for rho(0αKG)/rho(0CTL)	-1.387	-2.61534	0.0016	0.022717	-0.682	-1.60436	0.05613	0.181945	0.704	1.62902	0.05004	0.363332	231292_at	P	P	P	P	P	P	P	P	P	231292_at	7.65243	7.36024	6.92314	6.57173	5.96194	5.24161	6.71611	6.66988	6.50246
201313_at	g5803010	2026	ENO2	enolase 2 (gamma, neuronal)	Dampen: FDR p>0.05, |FC|>1.55 for rho(0αKG)/rho(0CTL)	-1.389	-2.61897	0.00359	0.036991	-0.631	-1.54864	0.10944	0.276216	0.758	1.69114	0.06183	0.395513	201313_at	P	P	P	P	P	P	P	P	P	201313_at	11.5053	11.4673	10.2592	9.56501	9.26268	10.2384	10.4711	10.6212	10.2464
212406_s_at	Hs.184628.2	55251	PCMTD2	protein-L-isoaspartate (D-aspartate) O-methyltransferase domain containing 2	Dampen: FDR p>0.05, |FC|>1.55 for rho(0αKG)/rho(0CTL)	-1.391	-2.6226	1e-05	0.000944	-0.718	-1.6449	0.0009	0.012642	0.674	1.59549	0.00137	0.070904	212406_s_at	P	P	P	P	P	P	P	P	P	212406_s_at	11.4103	11.5068	11.2477	9.77356	9.99537	10.2226	10.7108	10.7799	10.5215
232547_at	Hs.278639.0	80725	SRCIN1	SRC kinase signaling inhibitor 1	Dampen: FDR p>0.05, |FC|>1.55 for rho(0αKG)/rho(0CTL)	-1.403	-2.64451	6e-05	0.003298	-0.676	-1.5977	0.0075	0.04961	0.727	1.65519	0.00501	0.131974	232547_at	P	P	P	P	P	P	P	P	P	232547_at	8.16343	8.72384	8.15298	6.98294	7.10703	6.74211	7.82373	7.39184	7.79662
229297_at	Hs.44656.0	55668	GPATCH2L	G-patch domain containing 2 like	Dampen: FDR p>0.05, |FC|>1.55 for rho(0αKG)/rho(0CTL)	-1.41	-2.65737	1e-05	0.001258	-0.595	-1.51047	0.0048	0.037278	0.816	1.76052	0.00065	0.050587	229297_at	P	P	P	P	P	P	P	P	P	229297_at	10.5592	10.5441	10.3128	9.0488	8.80115	9.33505	9.89645	10.0098	9.72579
235957_at	Hs.107708.0	23426	GRIP1	glutamate receptor interacting protein 1	Narrow: FDR p<0.05, |FC|>1.55 for rho(0αKG)/rho(0CTL)	-1.414	-2.66475	0.00013	0.00527	-0.256	-1.19416	0.2765	0.485102	1.158	2.23148	0.00053	0.046771	235957_at	P	P	P	P	P	P	P	P	P	235957_at	7.98753	8.04892	8.85605	6.74364	7.01573	6.89204	8.14558	8.05873	7.92144
205173_x_at	g4502676	965	CD58	CD58 molecule	Dampen: FDR p>0.05, |FC|>1.55 for rho(0αKG)/rho(0CTL)	-1.42	-2.67586	0.0033	0.035171	-0.743	-1.67365	0.06787	0.205187	0.677	1.59881	0.0914	0.464075	205173_x_at	P	P	P	P	P	P	P	P	P	205173_x_at	11.1724	11.4302	11.5711	10.7092	10.1756	9.02951	10.5644	10.8252	10.555
223510_at	g11907927	8828	NRP2	neuropilin 2	Dampen: FDR p>0.05, |FC|>1.55 for rho(0αKG)/rho(0CTL)	-1.434	-2.70195	5e-05	0.003049	-0.728	-1.65634	0.0051	0.038654	0.706	1.63127	0.00603	0.142988	223510_at	P	P	P	P	P	P	P	P	P	223510_at	11.3657	11.5765	11.1181	9.77054	9.84024	10.1477	10.3972	10.476	11.0042
213482_at	Hs.7022.0	1795	DOCK3	dedicator of cytokinesis 3	Narrow: FDR p<0.05, |FC|>1.55 for rho(0αKG)/rho(0CTL)	-1.443	-2.71886	0	0.000303	-0.454	-1.36983	0.00383	0.032166	0.99	1.98618	1e-05	0.010861	213482_at	P	P	P	P	P	P	P	P	P	213482_at	8.73476	8.9326	8.88344	7.40632	7.53189	7.2825	8.35448	8.48122	8.35448
230258_at	Hs.107924.0	169792	GLIS3	GLIS family zinc finger 3	Dampen: FDR p>0.05, |FC|>1.55 for rho(0αKG)/rho(0CTL)	-1.45	-2.73208	0	0.00058	-0.815	-1.7593	0.00021	0.005051	0.635	1.55294	0.00117	0.065852	230258_at	P	P	P	P	P	P	P	P	P	230258_at	10.7601	10.5526	10.8038	9.40546	9.32387	9.0372	9.78876	9.94015	9.94352
1560814_a_at	Hs2.324127.4	90416	C15orf57	chromosome 15 open reading frame 57	Dampen: FDR p>0.05, |FC|>1.55 for rho(0αKG)/rho(0CTL)	-1.458	-2.74727	0.00058	0.01251	-0.634	-1.55186	0.05044	0.169801	0.823	1.76908	0.01678	0.228126	1560814_a_at	P	P	P	P	P	P	P	P	P	1560814_a_at	7.80871	8.19417	8.13182	6.7939	5.93212	7.03607	7.65641	7.49955	7.07618
1552677_a_at	Hs2.322903.1	23181	DIP2A	disco-interacting protein 2 homolog A	Dampen: FDR p>0.05, |FC|>1.55 for rho(0αKG)/rho(0CTL)	-1.467	-2.76446	1e-05	0.001272	-0.736	-1.66555	0.00171	0.019197	0.73	1.65864	0.0018	0.080371	1552677_a_at	P	P	P	P	P	P	P	P	P	1552677_a_at	9.37319	9.64289	9.20057	7.99847	7.69607	8.12224	8.51477	8.64243	8.85075
202497_x_at	Hs.7594.0	6515	SLC2A3	solute carrier family 2 (facilitated glucose transporter), member 3	Dampen: FDR p>0.05, |FC|>1.55 for rho(0αKG)/rho(0CTL)	-1.474	-2.77791	0.00014	0.005479	-0.621	-1.53794	0.02566	0.109309	0.854	1.80751	0.00517	0.133882	202497_x_at	P	P	P	P	P	P	P	P	P	202497_x_at	10.9985	10.9768	10.1161	9.04316	9.23138	9.39368	10.0576	9.95115	10.2201
201739_at	g5032090	6446	SGK1	serum/glucocorticoid regulated kinase 1	Narrow: FDR p<0.05, |FC|>1.55 for rho(0αKG)/rho(0CTL)	-1.474	-2.77791	7e-05	0.003753	-0.073	-1.0519	0.73893	0.854243	1.401	2.64085	0.0001	0.023774	201739_at	P	P	P	P	P	P	P	P	P	201739_at	12.9325	12.9207	12.4331	11.3251	11.6206	10.9193	12.7768	12.8242	12.466
211323_s_at	g1464750	3708	ITPR1	inositol 1,4,5-trisphosphate receptor, type 1	Dampen: FDR p>0.05, |FC|>1.55 for rho(0αKG)/rho(0CTL)	-1.477	-2.78369	4e-05	0.002817	-0.522	-1.43594	0.02886	0.117984	0.955	1.93858	0.00104	0.063149	211323_s_at	P	P	P	P	P	P	P	P	P	211323_s_at	10.4069	10.5825	9.95211	9.14197	8.62444	8.7436	9.81956	9.60399	9.95221
229779_at	Hs.119471.0	1286	COL4A4	collagen, type IV, alpha 4	Dampen: FDR p>0.05, |FC|>1.55 for rho(0αKG)/rho(0CTL)	-1.486	-2.80111	0.00396	0.039333	-0.847	-1.79876	0.05618	0.182016	0.639	1.55725	0.13259	0.530725	229779_at	A	P	P	A	A	A	A	A	P	229779_at	3.52894	5.00068	5.00049	3.24147	3.04159	2.78988	3.45845	3.39422	4.13733
203710_at	g10835022	3708	ITPR1	inositol 1,4,5-trisphosphate receptor, type 1	Dampen: FDR p>0.05, |FC|>1.55 for rho(0αKG)/rho(0CTL)	-1.496	-2.8206	0.0002	0.00688	-0.291	-1.22349	0.27267	0.481485	1.205	2.30537	0.00092	0.059554	203710_at	P	P	P	P	P	P	P	P	P	203710_at	8.87963	9.14972	9.0424	7.86033	7.80678	6.91738	8.61337	8.5815	9.00528
226666_at	Hs.197751.0	23002	DAAM1	dishevelled associated activator of morphogenesis 1	Narrow: FDR p<0.05, |FC|>1.55 for rho(0αKG)/rho(0CTL)	-1.497	-2.82255	9e-05	0.00437	-0.013	-1.00905	0.95362	0.976266	1.483	2.79529	0.0001	0.023167	226666_at	P	P	P	P	P	P	P	P	P	226666_at	8.06311	8.49696	8.43265	6.57187	6.80266	7.12799	8.31264	8.69639	7.94361
220940_at	g13449272	57730	ANKRD36B	ankyrin repeat domain 36B	Dampen: FDR p>0.05, |FC|>1.55 for rho(0αKG)/rho(0CTL)	-1.499	-2.82647	0.00041	0.010356	-0.578	-1.49278	0.06504	0.199719	0.921	1.89343	0.00858	0.167565	220940_at	P	P	P	P	P	P	P	P	P	220940_at	9.07	9.62578	9.23969	8.06374	8.20308	7.17204	8.57168	8.99898	8.63086
214043_at	Hs.323079.1	5789	PTPRD	protein tyrosine phosphatase, receptor type, D	Dampen: FDR p>0.05, |FC|>1.55 for rho(0αKG)/rho(0CTL)	-1.514	-2.85601	0.00012	0.005095	-0.724	-1.65176	0.01283	0.06974	0.789	1.72788	0.00822	0.164231	214043_at	P	P	P	P	P	P	P	P	P	214043_at	11.8613	12.0988	12.5077	10.8943	10.9041	10.1283	11.4349	11.3887	11.4714
234725_s_at	Hs.9598.1	10509	SEMA4B	sema domain, immunoglobulin domain (Ig), transmembrane domain (TM) and short cytoplasmic domain, (semaphorin) 4B	Dampen: FDR p>0.05, |FC|>1.55 for rho(0αKG)/rho(0CTL)	-1.522	-2.87189	0.00551	0.048	-0.662	-1.58227	0.14879	0.334199	0.86	1.81504	0.07055	0.418481	234725_s_at	P	P	P	P	P	P	P	P	P	234725_s_at	11.0235	11.7963	10.3274	8.95303	9.32277	10.3058	10.271	10.1594	10.7307
233737_s_at	Hs.141441.0	284561	LOC284561	uncharacterized LOC284561	Dampen: FDR p>0.05, |FC|>1.55 for rho(0αKG)/rho(0CTL)	-1.531	-2.88986	0.00263	0.030789	-0.442	-1.35849	0.2645	0.47262	1.088	2.12579	0.01688	0.228759	233737_s_at	P	P	P	P	P	P	P	P	P	233737_s_at	7.68851	7.74146	9.24562	6.58745	6.99804	6.49717	7.71304	7.92728	7.70777
202284_s_at	g11386202	1026	CDKN1A	cyclin-dependent kinase inhibitor 1A (p21, Cip1)	Dampen: FDR p>0.05, |FC|>1.55 for rho(0αKG)/rho(0CTL)	-1.536	-2.89989	0.00053	0.011881	-0.663	-1.58337	0.04968	0.168033	0.873	1.83147	0.01536	0.219214	202284_s_at	P	P	P	P	P	P	P	P	P	202284_s_at	12.1764	12.4636	12.3299	10.4941	10.2798	11.5885	11.6609	11.6825	11.6378
219233_s_at	g8924175	55876	GSDMB	gasdermin B	Dampen: FDR p>0.05, |FC|>1.55 for rho(0αKG)/rho(0CTL)	-1.537	-2.9019	5e-05	0.003206	-0.542	-1.45599	0.03244	0.127666	0.995	1.99308	0.00124	0.067529	219233_s_at	P	P	P	P	P	P	P	P	P	219233_s_at	8.57255	8.25672	8.21169	6.70379	6.41438	7.31097	7.78553	7.83087	7.79758
213434_at	Hs.13431.0	2054	STX2	syntaxin 2	Narrow: FDR p<0.05, |FC|>1.55 for rho(0αKG)/rho(0CTL)	-1.542	-2.91198	0	0.000608	-0.711	-1.63694	0.00094	0.012928	0.831	1.77892	0.00032	0.036731	213434_at	P	P	P	P	P	P	P	P	P	213434_at	10.7893	11.0245	10.8613	9.21989	9.17818	9.65189	10.144	10.199	10.2003
1555989_at	Hs2.356537.1	23002	DAAM1	dishevelled associated activator of morphogenesis 1	Narrow: FDR p<0.05, |FC|>1.55 for rho(0αKG)/rho(0CTL)	-1.553	-2.93427	0.00014	0.005596	-0.095	-1.06807	0.70828	0.834928	1.458	2.74727	0.00023	0.031728	1555989_at	P	P	P	P	P	P	P	P	P	1555989_at	8.49116	9.02436	8.78414	7.01153	6.98921	7.63947	8.73073	9.01301	8.27006
227750_at	Hs.162189.1	8997	KALRN	kalirin, RhoGEF kinase	Dampen: FDR p>0.05, |FC|>1.55 for rho(0αKG)/rho(0CTL)	-1.556	-2.94037	5e-05	0.003233	-0.754	-1.68646	0.00714	0.048086	0.802	1.74352	0.00507	0.132626	227750_at	P	P	P	P	P	P	P	P	P	227750_at	8.97012	9.74404	9.61249	7.96437	7.58201	8.11308	8.56732	8.75059	8.74667
237173_at	Hs.132689.0	105369199	LOC105369199	putative neuroblastoma breakpoint family member 6-like protein	Dampen: FDR p>0.05, |FC|>1.55 for rho(0αKG)/rho(0CTL)	-1.584	-2.998	9e-05	0.004457	-0.934	-1.91057	0.00346	0.03016	0.65	1.56917	0.02296	0.260122	237173_at	P	P	P	P	P	P	P	P	P	237173_at	7.81786	7.97287	8.40442	6.75656	6.20283	6.48485	6.75463	7.52552	7.11424
212977_at	Hs.23016.0	57007	ACKR3	atypical chemokine receptor 3	Dampen: FDR p>0.05, |FC|>1.55 for rho(0αKG)/rho(0CTL)	-1.599	-3.02933	0.002	0.025903	-0.234	-1.17609	0.54416	0.721247	1.365	2.57576	0.00516	0.133673	212977_at	P	P	P	P	P	P	P	P	P	212977_at	11.8113	11.562	10.5044	9.27606	9.40508	10.3998	11.0064	11.0102	11.1585
215033_at	Hs.306643.0	4071	TM4SF1	transmembrane 4 L six family member 1	Dampen: FDR p>0.05, |FC|>1.55 for rho(0αKG)/rho(0CTL)	-1.608	-3.04829	0.00196	0.025648	-0.707	-1.63241	0.09032	0.244838	0.901	1.86736	0.03887	0.328216	215033_at	P	P	P	P	P	P	P	P	P	215033_at	9.60345	9.50192	8.32899	7.71175	8.0222	6.87526	8.38701	8.32899	8.59621
209794_at	g2887442	9901	SRGAP3	SLIT-ROBO Rho GTPase activating protein 3	Dampen: FDR p>0.05, |FC|>1.55 for rho(0αKG)/rho(0CTL)	-1.63	-3.09513	1e-05	0.001414	-0.875	-1.83401	0.00131	0.01611	0.755	1.68763	0.00332	0.107904	209794_at	A	A	A	A	A	A	A	A	A	209794_at	6.94866	7.35867	7.61604	5.5526	5.67795	5.80299	6.42224	6.20498	6.67013
213430_at	Hs.7972.2	22902	RUFY3	RUN and FYVE domain containing 3	Narrow: FDR p<0.05, |FC|>1.55 for rho(0αKG)/rho(0CTL)	-1.635	-3.10588	0	0.000773	-0.61	-1.52626	0.00509	0.038609	1.025	2.03496	0.00016	0.028589	213430_at	P	P	P	A	A	P	P	P	A	213430_at	7.19719	7.53648	7.02768	5.47061	5.50504	5.88197	6.57328	6.70296	6.65538
229225_at	Hs.17778.6	8828	NRP2	neuropilin 2	Dampen: FDR p>0.05, |FC|>1.55 for rho(0αKG)/rho(0CTL)	-1.641	-3.11882	0	0.000665	-1.001	-2.00139	0.00015	0.004148	0.64	1.55833	0.00319	0.105614	229225_at	P	P	P	P	P	P	P	P	P	229225_at	13.0666	13.0565	12.8744	11.2888	11.0925	11.6942	12.009	11.9152	12.0704
213922_at	Hs.125836.1	146057	TTBK2	tau tubulin kinase 2	Dampen: FDR p>0.05, |FC|>1.55 for rho(0αKG)/rho(0CTL)	-1.642	-3.12098	0.00491	0.044786	-0.843	-1.79378	0.08968	0.243822	0.799	1.73989	0.10491	0.489291	213922_at	P	P	P	P	P	P	P	P	P	213922_at	8.00195	8.38706	7.69017	5.6279	6.1047	7.42006	7.66584	7.26129	6.62323
219132_at	g10864062	57161	PELI2	pellino E3 ubiquitin protein ligase family member 2	Dampen: FDR p>0.05, |FC|>1.55 for rho(0αKG)/rho(0CTL)	-1.666	-3.17334	0.0007	0.013916	-0.857	-1.81127	0.02883	0.117948	0.809	1.752	0.03668	0.320835	219132_at	P	P	P	P	P	P	P	P	P	219132_at	11.1979	10.7777	11.1283	8.86065	8.97414	10.2719	10.2544	10.1326	10.1457
232689_at	Hs.141441.1	284561	LOC284561	uncharacterized LOC284561	Dampen: FDR p>0.05, |FC|>1.55 for rho(0αKG)/rho(0CTL)	-1.688	-3.2221	0.00295	0.032855	-0.805	-1.74715	0.08618	0.237858	0.882	1.84293	0.06397	0.401187	232689_at	P	P	P	P	P	P	P	P	P	232689_at	9.16932	9.43466	11.0163	8.31583	8.38837	7.85329	9.08665	8.88208	9.236
231779_at	Hs.249175.0	3656	IRAK2	interleukin 1 receptor associated kinase 2	Dampen: FDR p>0.05, |FC|>1.55 for rho(0αKG)/rho(0CTL)	-1.69	-3.22657	0.00023	0.007507	-0.627	-1.54435	0.05676	0.183191	1.063	2.08927	0.00489	0.129812	231779_at	P	P	P	P	P	P	P	P	P	231779_at	10.3008	10.0743	10.5694	8.11531	8.4727	9.28626	9.91681	9.75067	9.39668
205931_s_at	g4758499	9586	CREB5	cAMP responsive element binding protein 5	Dampen: FDR p>0.05, |FC|>1.55 for rho(0αKG)/rho(0CTL)	-1.703	-3.25577	0.00017	0.006161	-1	-2	0.00561	0.041088	0.703	1.62789	0.03147	0.299474	205931_s_at	P	P	P	P	P	P	P	P	P	205931_s_at	7.83119	7.82097	8.32045	5.80052	6.20286	6.86037	7.17711	7.14004	6.65648
222881_at	g5880862	10855	HPSE	heparanase	Dampen: FDR p>0.05, |FC|>1.55 for rho(0αKG)/rho(0CTL)	-1.705	-3.26029	1e-05	0.000844	-0.997	-1.99585	0.00032	0.006659	0.708	1.63354	0.00313	0.104636	222881_at	P	P	P	P	A	P	P	P	A	222881_at	6.90816	7.21456	6.59405	5.1009	5.0388	5.4634	5.93991	5.89017	5.89656
222877_at	Hs.63382.0	8828	NRP2	neuropilin 2	Dampen: FDR p>0.05, |FC|>1.55 for rho(0αKG)/rho(0CTL)	-1.713	-3.27842	0	0.000727	-0.875	-1.83401	0.00064	0.010305	0.838	1.78757	0.00086	0.057604	222877_at	P	P	P	P	P	P	P	P	P	222877_at	11.8769	12.2973	11.9983	10.3133	10.2154	10.5052	11.1065	10.9693	11.4719
222585_x_at	Hs.5721.0	51315	KRCC1	lysine-rich coiled-coil 1	Dampen: FDR p>0.05, |FC|>1.55 for rho(0αKG)/rho(0CTL)	-1.714	-3.28069	0.0006	0.012772	-0.827	-1.77399	0.03442	0.132608	0.887	1.84933	0.02558	0.272038	222585_x_at	P	P	P	P	P	P	P	P	P	222585_x_at	9.193	10.2618	10.0197	7.89667	7.69942	8.73724	8.96762	9.26046	8.76602
201170_s_at	g4503298	8553	BHLHE40	basic helix-loop-helix family, member e40	Dampen: FDR p>0.05, |FC|>1.55 for rho(0αKG)/rho(0CTL)	-1.724	-3.30351	0.00562	0.048537	-0.133	-1.09657	0.78721	0.88441	1.591	3.01258	0.00871	0.168901	201170_s_at	P	P	P	P	P	P	P	P	P	201170_s_at	11.5396	11.2746	10.5201	8.69743	8.85509	10.6107	11.0819	11.1513	10.7034
232404_at	Hs.272565.0	57477	SHROOM4	shroom family member 4	Dampen: FDR p>0.05, |FC|>1.55 for rho(0αKG)/rho(0CTL)	-1.751	-3.36592	0.00108	0.01806	-0.437	-1.35379	0.26781	0.476348	1.313	2.48458	0.00627	0.145649	232404_at	P	P	P	A	P	P	P	P	P	232404_at	8.10598	7.17243	8.20339	5.47911	5.90117	6.84929	7.62631	7.31868	7.2249
238168_at	Hs.201629.0	4071	TM4SF1	transmembrane 4 L six family member 1	Dampen: FDR p>0.05, |FC|>1.55 for rho(0αKG)/rho(0CTL)	-1.768	-3.40581	0.00368	0.03759	-0.829	-1.77645	0.10117	0.263107	0.939	1.9172	0.06871	0.414282	238168_at	P	P	P	P	P	P	P	P	P	238168_at	10.1105	9.63093	8.30788	7.93235	7.96304	6.84929	8.50842	8.75316	8.29978
205702_at	g5729975	10745	PHTF1	putative homeodomain transcription factor 1	Dampen: FDR p>0.05, |FC|>1.55 for rho(0αKG)/rho(0CTL)	-1.773	-3.41764	0.00018	0.006407	-1.044	-2.06194	0.00578	0.041925	0.729	1.65749	0.03324	0.305753	205702_at	P	P	P	P	P	A	P	P	P	205702_at	7.40607	8.14988	8.63581	6.589	6.34167	5.94323	7.10355	6.88015	7.07628
238681_at	Hs.153485.0	284161	GDPD1	glycerophosphodiester phosphodiesterase domain containing 1	Dampen: FDR p>0.05, |FC|>1.55 for rho(0αKG)/rho(0CTL)	-1.785	-3.44618	2e-05	0.002088	-1.013	-2.0181	0.00154	0.017973	0.772	1.70764	0.0077	0.158614	238681_at	P	P	P	P	P	P	P	P	P	238681_at	7.86245	8.29856	8.33237	6.13445	6.25004	6.75395	7.51278	7.05705	6.88526
225566_at	Hs.17778.2	8828	NRP2	neuropilin 2	Narrow: FDR p<0.05, |FC|>1.55 for rho(0αKG)/rho(0CTL)	-1.796	-3.47256	0	0.00058	-0.821	-1.76663	0.00087	0.012336	0.975	1.96564	0.00026	0.033508	225566_at	P	P	P	P	P	P	P	P	P	225566_at	10.7866	10.7587	10.7581	8.74944	8.78457	9.38015	9.92954	9.90691	10.0037
229302_at	Hs.40808.0	130733	TMEM178A	transmembrane protein 178A	Dampen: FDR p>0.05, |FC|>1.55 for rho(0αKG)/rho(0CTL)	-1.817	-3.52348	0.0002	0.006917	-1.014	-2.0195	0.00852	0.05381	0.803	1.74473	0.02624	0.27534	229302_at	P	P	P	P	P	P	P	P	P	229302_at	8.86787	9.64234	8.61714	7.41582	6.65386	7.6076	8.12396	7.90117	8.06146
214632_at	Hs.17778.8	8828	NRP2	neuropilin 2	Narrow: FDR p<0.05, |FC|>1.55 for rho(0αKG)/rho(0CTL)	-1.826	-3.54553	0	0.000476	-0.863	-1.81882	0.00052	0.009001	0.962	1.94801	0.00024	0.032521	214632_at	P	P	P	P	P	P	P	P	P	214632_at	11.5542	11.5606	11.16	9.56631	9.40512	9.8264	10.5621	10.4128	10.7101
226057_at	Hs.300670.0	57514	ARHGAP31	Rho GTPase activating protein 31	Narrow: FDR p<0.05, |FC|>1.55 for rho(0αKG)/rho(0CTL)	-1.828	-3.55045	0	8.4e-05	-0.911	-1.88035	3e-05	0.00149	0.917	1.88818	3e-05	0.013234	226057_at	P	P	P	A	A	A	P	A	A	226057_at	6.72327	6.95804	6.92757	5.06994	4.92409	5.1299	5.99953	5.89687	5.97835
1559413_at	Hs2.283165.2	255394	TCP11L2	t-complex 11, testis-specific-like 2	Dampen: FDR p>0.05, |FC|>1.55 for rho(0αKG)/rho(0CTL)	-1.832	-3.5603	0.0047	0.043756	-0.427	-1.34443	0.40643	0.609052	1.404	2.64634	0.01877	0.239538	1559413_at	P	P	P	A	A	P	P	P	P	1559413_at	7.15232	7.55039	7.32794	5.09576	4.6014	6.83814	6.5205	6.97201	7.25605
238332_at	Hs.135560.0	147463	ANKRD29	ankyrin repeat domain 29	Dampen: FDR p>0.05, |FC|>1.55 for rho(0αKG)/rho(0CTL)	-1.845	-3.59253	0.00014	0.005534	-0.943	-1.92252	0.0103	0.060704	0.902	1.86865	0.01287	0.201746	238332_at	P	P	P	P	P	P	P	P	P	238332_at	7.79866	8.54076	9.20968	6.66291	6.66793	6.68311	7.55578	7.69148	7.47359
1554250_s_at	Hs2.150490.2	375593	TRIM73	tripartite motif containing 73	Dampen: FDR p>0.05, |FC|>1.55 for rho(0αKG)/rho(0CTL)	-1.865	-3.64268	2e-05	0.001814	-0.988	-1.98343	0.002	0.021216	0.877	1.83655	0.00412	0.118925	1554250_s_at	P	P	P	P	P	P	P	P	P	1554250_s_at	7.78407	8.28319	8.30757	6.69494	5.84958	6.23651	6.99487	7.31807	7.09896
211844_s_at	g2547129	8828	NRP2	neuropilin 2	Dampen: FDR p>0.05, |FC|>1.55 for rho(0αKG)/rho(0CTL)	-1.871	-3.65786	0	0.000774	-0.926	-1.9	0.00088	0.012465	0.945	1.92519	0.00077	0.054468	211844_s_at	P	P	P	P	P	P	P	P	P	211844_s_at	12.4523	12.4486	12.0235	10.6135	10.0652	10.6325	11.4197	11.2381	11.4887
201610_at	Hs.183212.0	23463	ICMT	isoprenylcysteine carboxyl methyltransferase	Dampen: FDR p>0.05, |FC|>1.55 for rho(0αKG)/rho(0CTL)	-1.877	-3.6731	0.00122	0.019342	-1.162	-2.23767	0.01836	0.087859	0.715	1.64148	0.11087	0.498844	201610_at	P	P	P	P	P	P	P	P	P	201610_at	8.97098	8.53546	8.19042	7.13784	7.23173	5.69662	7.06926	7.81554	7.32537
219367_s_at	g8924189	8828	NRP2	neuropilin 2	Dampen: FDR p>0.05, |FC|>1.55 for rho(0αKG)/rho(0CTL)	-1.887	-3.69865	0	0.00058	-1.145	-2.21146	0.00011	0.00348	0.741	1.67133	0.00229	0.090054	219367_s_at	P	P	P	P	P	P	P	P	P	219367_s_at	11.6892	11.8599	11.2138	9.71591	9.52271	9.8641	10.4247	10.3736	10.5285
233329_s_at	Hs.5721.1	51315	KRCC1	lysine-rich coiled-coil 1	Dampen: FDR p>0.05, |FC|>1.55 for rho(0αKG)/rho(0CTL)	-1.91	-3.75809	4e-05	0.002663	-0.754	-1.68646	0.0166	0.082401	1.155	2.22684	0.0015	0.073532	233329_s_at	P	P	P	P	P	P	P	P	P	233329_s_at	8.35866	9.20244	9.27941	6.72114	7.03376	7.35709	8.18858	8.33614	8.05337
220141_at	g13376186	79864	C11orf63	chromosome 11 open reading frame 63	Dampen: FDR p>0.05, |FC|>1.55 for rho(0αKG)/rho(0CTL)	-1.918	-3.77899	0.00447	0.042374	-0.876	-1.83528	0.11964	0.291484	1.042	2.05908	0.07114	0.419646	220141_at	P	P	P	P	P	P	P	P	P	220141_at	7.52767	9.00136	9.10514	5.8253	6.40512	7.65083	7.49482	7.8612	7.65083
232968_at	Hs.316433.0	92565	FANK1	fibronectin type III and ankyrin repeat domains 1	Narrow: FDR p<0.05, |FC|>1.55 for rho(0αKG)/rho(0CTL)	-1.934	-3.82113	1e-05	0.000964	-0.821	-1.76663	0.00332	0.029395	1.113	2.16295	0.00045	0.04365	232968_at	P	P	P	P	A	P	P	P	P	232968_at	8.7893	9.04026	8.73611	7.03551	6.58017	7.14895	8.23234	8.22087	7.65083
218303_x_at	g7706155	51315	KRCC1	lysine-rich coiled-coil 1	Dampen: FDR p>0.05, |FC|>1.55 for rho(0αKG)/rho(0CTL)	-1.94	-3.83706	2e-05	0.002048	-0.722	-1.64947	0.01617	0.080992	1.218	2.32624	0.00076	0.054248	218303_x_at	P	P	P	P	P	P	P	P	P	218303_x_at	9.44173	10.3446	10.3277	7.84373	8.13482	8.31556	9.3113	9.44853	9.18951
1552439_s_at	Hs2.248367.1	84465	MEGF11	multiple EGF-like-domains 11	Dampen: FDR p>0.05, |FC|>1.55 for rho(0αKG)/rho(0CTL)	-1.94	-3.83706	0.00285	0.032284	-1.002	-2.00277	0.06549	0.200611	0.938	1.91587	0.0811	0.44244	1552439_s_at	P	P	P	P	A	A	P	P	P	1552439_s_at	6.7795	6.93405	8.27689	6.06066	5.67014	4.44028	6.5611	6.40868	6.01613
231175_at	Hs.12431.0	221336	BEND6	BEN domain containing 6	Dampen: FDR p>0.05, |FC|>1.55 for rho(0αKG)/rho(0CTL)	-1.946	-3.85305	0.00192	0.025246	-1.063	-2.08927	0.04219	0.151263	0.883	1.84421	0.08112	0.44244	231175_at	P	P	P	P	A	A	P	P	P	231175_at	5.07873	6.03233	7.22938	4.09924	3.85892	4.54395	4.91904	5.07873	5.1524
210118_s_at	g186277	3552	IL1A	interleukin 1 alpha	Narrow: FDR p<0.05, |FC|>1.55 for rho(0αKG)/rho(0CTL)	-1.968	-3.91225	2e-05	0.001897	-0.008	-1.00556	0.97381	0.987193	1.959	3.88792	2e-05	0.013234	210118_s_at	P	P	P	P	P	P	P	P	P	210118_s_at	9.12455	9.05823	8.73965	6.71652	6.68338	7.61968	8.97634	9.08889	8.83244
220988_s_at	g13569918	114899	C1QTNF3	C1q and tumor necrosis factor related protein 3	Narrow: FDR p<0.05, |FC|>1.55 for rho(0αKG)/rho(0CTL)	-1.976	-3.93401	0	0.000282	-1.14	-2.20381	5e-05	0.002064	0.837	1.78633	0.00048	0.044138	220988_s_at	P	P	P	A	A	A	P	P	A	220988_s_at	6.6323	6.51722	6.44954	4.45762	4.30924	4.9036	5.39096	5.39456	5.39456
231966_at	Hs.247748.1	55607	PPP1R9A	protein phosphatase 1, regulatory subunit 9A	Dampen: FDR p>0.05, |FC|>1.55 for rho(0αKG)/rho(0CTL)	-1.979	-3.9422	4e-05	0.002604	-1.239	-2.36035	0.00116	0.014884	0.741	1.67133	0.02076	0.24964	231966_at	P	P	P	P	P	P	P	P	P	231966_at	8.9219	8.51958	9.13192	6.4394	7.06123	7.1352	8.00483	7.66117	7.19188
226770_at	Hs.49169.2	260425	MAGI3	membrane associated guanylate kinase, WW and PDZ domain containing 3	Dampen: FDR p>0.05, |FC|>1.55 for rho(0αKG)/rho(0CTL)	-1.984	-3.95588	0.00025	0.0078	-1.243	-2.3669	0.00536	0.039998	0.742	1.67249	0.0574	0.383489	226770_at	P	P	P	P	P	P	P	P	P	226770_at	8.04474	8.79792	8.82223	6.07061	6.24189	7.39933	7.32765	7.27638	7.33328
214409_at	Hs.274285.0	10737	RFPL3S	RFPL3 antisense	Dampen: FDR p>0.05, |FC|>1.55 for rho(0αKG)/rho(0CTL)	-1.996	-3.98893	0.00021	0.007158	-0.511	-1.42504	0.16101	0.350858	1.485	2.79917	0.00165	0.076277	214409_at	P	P	P	P	A	A	P	P	P	214409_at	6.47374	5.95679	5.50417	4.6128	3.34275	3.99094	5.71026	5.44208	5.24816
213703_at	Hs.79732.4	150759	LINC00342	long intergenic non-protein coding RNA 342	Dampen: FDR p>0.05, |FC|>1.55 for rho(0αKG)/rho(0CTL)	-1.999	-3.99723	0.00174	0.023826	-0.749	-1.68063	0.13386	0.3128	1.25	2.37841	0.02261	0.258691	213703_at	P	P	P	P	P	P	P	P	P	213703_at	10.5214	10.2942	10.115	8.97471	8.92608	7.03282	9.41047	9.84753	9.42457
220132_s_at	g7019446	29121	CLEC2D	C-type lectin domain family 2, member D	Dampen: FDR p>0.05, |FC|>1.55 for rho(0αKG)/rho(0CTL)	-2.001	-4.00277	0.00124	0.019472	-0.768	-1.70291	0.10907	0.275742	1.233	2.35055	0.01898	0.240402	220132_s_at	P	P	P	A	A	P	P	P	P	220132_s_at	6.46727	7.05857	7.19697	4.04261	4.68491	5.99141	6.22835	6.32004	5.86993
1553971_a_at	Hs2.351547.1	352954	GATS	GATS, stromal antigen 3 opposite strand	Dampen: FDR p>0.05, |FC|>1.55 for rho(0αKG)/rho(0CTL)	-2.005	-4.01389	0.00017	0.006195	-1.297	-2.45717	0.00321	0.028716	0.708	1.63354	0.05792	0.385108	1553971_a_at	P	P	P	A	P	P	P	P	P	1553971_a_at	6.22351	6.65568	7.54255	4.35694	4.7983	5.25134	5.50797	5.51846	5.5032
207117_at	g7705388	51351	ZNF117	zinc finger protein 117	Dampen: FDR p>0.05, |FC|>1.55 for rho(0αKG)/rho(0CTL)	-2.024	-4.0671	1e-05	0.001382	-1.249	-2.37677	0.00049	0.008662	0.775	1.71119	0.00939	0.175261	207117_at	P	P	P	P	A	A	P	P	A	207117_at	5.39462	6.00701	6.28995	3.99872	3.55111	4.07003	4.47529	4.75382	4.71453
211786_at	g13623200	3604	TNFRSF9	tumor necrosis factor receptor superfamily, member 9	Dampen: FDR p>0.05, |FC|>1.55 for rho(0αKG)/rho(0CTL)	-2.046	-4.12959	2e-05	0.001659	-1.236	-2.35545	0.00075	0.011334	0.81	1.75321	0.00973	0.178243	211786_at	P	P	P	A	A	A	A	A	A	211786_at	7.27274	7.24988	7.51009	5.57261	5.67462	4.64785	5.99676	6.19795	6.12903
238513_at	Hs.25978.0	79056	PRRG4	proline rich Gla (G-carboxyglutamic acid) 4 (transmembrane)	Dampen: FDR p>0.05, |FC|>1.55 for rho(0αKG)/rho(0CTL)	-2.052	-4.1468	0.00018	0.006411	-1.238	-2.35871	0.00507	0.038544	0.814	1.75808	0.03844	0.326836	238513_at	P	P	P	P	A	P	P	P	P	238513_at	6.0568	4.74191	5.74821	3.69198	2.92644	3.77144	4.32826	4.17663	4.32826
210592_s_at	g338335	6303	SAT1	spermidine/spermine N1-acetyltransferase 1	Dampen: FDR p>0.05, |FC|>1.55 for rho(0αKG)/rho(0CTL)	-2.064	-4.18144	4e-05	0.002516	-1.295	-2.45377	0.00108	0.014206	0.769	1.70409	0.02046	0.248412	210592_s_at	P	P	P	P	P	P	P	P	P	210592_s_at	12.8764	12.3013	12.2292	10.0952	10.078	11.0423	11.061	11.2841	11.1773
231894_at	Hs.18498.0	6301	SARS	seryl-tRNA synthetase	Dampen: FDR p>0.05, |FC|>1.55 for rho(0αKG)/rho(0CTL)	-2.068	-4.19305	1e-05	0.001278	-0.921	-1.89343	0.00361	0.030999	1.147	2.21453	0.0009	0.05879	231894_at	P	P	P	P	P	P	P	P	P	231894_at	11.96	11.6152	12.0141	9.62161	9.39478	10.3677	10.8865	11.0378	10.9021
219714_s_at	g8923764	55799	CACNA2D3	calcium channel, voltage-dependent, alpha 2/delta subunit 3	Dampen: FDR p>0.05, |FC|>1.55 for rho(0αKG)/rho(0CTL)	-2.069	-4.19596	0.00088	0.01586	-1.407	-2.65185	0.00898	0.05564	0.662	1.58227	0.15292	0.559905	219714_s_at	P	P	P	P	P	P	P	P	P	219714_s_at	8.93249	10.228	9.48962	7.91221	8.02859	6.50329	8.17755	8.17755	8.07428
236704_at	Hs.94116.0	101929787	LOC101929787	uncharacterized LOC101929787	Narrow: FDR p<0.05, |FC|>1.55 for rho(0αKG)/rho(0CTL)	-2.095	-4.27226	1e-05	0.001189	-0.727	-1.65519	0.01281	0.069715	1.368	2.58112	0.00025	0.033185	236704_at	P	P	P	P	P	P	P	P	P	236704_at	10.1201	10.2454	10.7234	8.1559	7.91477	8.73447	9.70232	9.76758	9.43844
1552739_s_at	Hs2.293483.2	54879	ST7L	suppression of tumorigenicity 7 like	Dampen: FDR p>0.05, |FC|>1.55 for rho(0αKG)/rho(0CTL)	-2.104	-4.299	0	0.000176	-1.436	-2.7057	1e-05	0.000677	0.669	1.58997	0.0018	0.080371	1552739_s_at	P	P	P	P	P	P	P	P	P	1552739_s_at	9.21462	9.16081	9.01073	7.21763	7.15044	6.70538	7.7817	7.6894	7.60806
206546_at	g7657634	10388	SYCP2	synaptonemal complex protein 2	Dampen: FDR p>0.05, |FC|>1.55 for rho(0αKG)/rho(0CTL)	-2.108	-4.31093	0	0.000167	-1.459	-2.74918	0	0.000609	0.649	1.56808	0.00204	0.08417	206546_at	P	P	P	A	A	A	P	A	A	206546_at	6.70351	6.69175	7.0268	4.65729	4.93681	4.50543	5.32343	5.26895	5.45378
205092_x_at	g7662437	22890	ZBTB1	zinc finger and BTB domain containing 1	Dampen: FDR p>0.05, |FC|>1.55 for rho(0αKG)/rho(0CTL)	-2.113	-4.3259	0.00403	0.039729	-0.985	-1.97931	0.10769	0.273665	1.128	2.18556	0.07103	0.419292	205092_x_at	P	P	P	P	P	P	P	P	P	205092_x_at	7.66304	6.68608	8.10644	6.1459	5.87003	4.102	7.04395	6.2619	6.19598
39402_at	4881243_RC	3553	IL1B	interleukin 1 beta	Dampen: FDR p>0.05, |FC|>1.55 for rho(0αKG)/rho(0CTL)	-2.116	-4.3349	0.00105	0.017722	-1.059	-2.08349	0.04153	0.149797	1.057	2.0806	0.04178	0.338671	39402_at	P	P	P	P	P	P	P	P	P	39402_at	10.36	9.8547	11.3173	7.9456	7.90522	9.33464	9.60676	9.57679	9.17264
225224_at	Hs.19221.0	140688	NOL4L	nucleolar protein 4-like	Dampen: FDR p>0.05, |FC|>1.55 for rho(0αKG)/rho(0CTL)	-2.119	-4.34393	0.00011	0.005024	-1.43	-2.69447	0.00179	0.019716	0.689	1.61217	0.0642	0.401814	225224_at	P	P	P	P	P	P	P	P	P	225224_at	10.545	10.5401	10.1515	7.65939	8.08021	9.14104	8.82124	9.01201	9.11395
205067_at	g10835144	3553	IL1B	interleukin 1 beta	Dampen: FDR p>0.05, |FC|>1.55 for rho(0αKG)/rho(0CTL)	-2.126	-4.36506	0.00261	0.030614	-1.079	-2.11257	0.06593	0.201471	1.046	2.0648	0.07308	0.424365	205067_at	P	P	P	P	P	P	P	P	P	205067_at	9.66725	8.99997	10.5985	6.95125	7.17875	8.75853	8.86512	8.87522	8.28748
225344_at	Hs.6966.0	135112	NCOA7	nuclear receptor coactivator 7	Dampen: FDR p>0.05, |FC|>1.55 for rho(0αKG)/rho(0CTL)	-2.129	-4.37414	1e-05	0.000866	-1.403	-2.64451	0.00014	0.003996	0.726	1.65405	0.00988	0.179576	225344_at	P	P	P	P	P	P	P	P	P	225344_at	9.52925	9.26126	9.35058	6.8958	7.23311	7.62407	8.34938	7.92071	7.6607
205638_at	g4502358	577	ADGRB3	adhesion G protein-coupled receptor B3	Dampen: FDR p>0.05, |FC|>1.55 for rho(0αKG)/rho(0CTL)	-2.134	-4.38933	0.00048	0.011109	-1.35	-2.54912	0.00821	0.052526	0.784	1.7219	0.08153	0.443817	205638_at	P	P	P	A	M	A	P	P	A	205638_at	5.82159	6.47439	6.80096	4.05718	5.10218	3.53421	5.32241	5.10218	4.62207
224307_x_at	g12003993	260425	MAGI3	membrane associated guanylate kinase, WW and PDZ domain containing 3	Dampen: FDR p>0.05, |FC|>1.55 for rho(0αKG)/rho(0CTL)	-2.194	-4.57572	1e-05	0.001382	-1.197	-2.29262	0.00114	0.014689	0.997	1.99585	0.00357	0.11092	224307_x_at	P	P	P	P	P	P	P	P	P	224307_x_at	8.37332	8.78399	8.67652	5.8985	6.33647	7.01733	7.36984	7.33164	7.5421
226145_s_at	Hs.15420.1	80144	FRAS1	Fraser extracellular matrix complex subunit 1	Dampen: FDR p>0.05, |FC|>1.55 for rho(0αKG)/rho(0CTL)	-2.248	-4.75024	0.00033	0.008996	-1.561	-2.95058	0.0036	0.030952	0.688	1.61105	0.11928	0.511444	226145_s_at	P	P	P	P	P	P	P	P	P	226145_s_at	10.2834	10.4507	11.1711	8.84602	8.90734	7.40701	9.23108	8.7732	9.21905
1556257_at	Hs2.169657.1	645513	LOC645513	uncharacterized LOC645513	Dampen: FDR p>0.05, |FC|>1.55 for rho(0αKG)/rho(0CTL)	-2.325	-5.01066	0.00556	0.048225	-0.914	-1.88426	0.18821	0.38606	1.412	2.66106	0.05539	0.3786	1556257_at	P	P	P	A	A	P	P	P	P	1556257_at	6.87207	8.34317	7.89867	4.9186	4.31624	6.90289	6.15389	7.07253	7.14639
1555898_at	Hs2.406128.1	400986	ANKRD36C	ankyrin repeat domain 36C	Dampen: FDR p>0.05, |FC|>1.55 for rho(0αKG)/rho(0CTL)	-2.345	-5.0806	0.00019	0.006689	-1.498	-2.82451	0.00383	0.032206	0.848	1.8	0.05654	0.381338	1555898_at	P	P	P	A	A	A	A	P	A	1555898_at	7.14708	6.57835	5.48401	4.2339	4.01474	3.92512	4.73649	5.4224	4.55744
235408_x_at	Hs.184987.0	51351	ZNF117	zinc finger protein 117	Dampen: FDR p>0.05, |FC|>1.55 for rho(0αKG)/rho(0CTL)	-2.352	-5.10532	3e-05	0.00226	-1.561	-2.95058	0.00062	0.010112	0.792	1.73147	0.02858	0.286555	235408_x_at	P	P	P	A	A	A	A	P	A	235408_x_at	6.77778	7.21595	7.41478	5.24042	5.08342	4.02735	5.46811	5.72982	5.52844
1557143_at	Hs2.345063.1	114784	CSMD2	CUB and Sushi multiple domains 2	Dampen: FDR p>0.05, |FC|>1.55 for rho(0αKG)/rho(0CTL)	-2.385	-5.22344	0.00079	0.014947	-1.543	-2.914	0.0107	0.062173	0.842	1.79253	0.1139	0.50271	1557143_at	P	P	P	A	A	P	P	P	P	1557143_at	5.8315	6.6827	7.82622	3.88183	4.11288	5.19201	5.27672	5.2326	5.20252
213839_at	Hs.301478.0	79789	CLMN	calmin (calponin-like, transmembrane)	Dampen: FDR p>0.05, |FC|>1.55 for rho(0αKG)/rho(0CTL)	-2.389	-5.23794	0	0.000379	-1.36	-2.56685	9e-05	0.003093	1.029	2.04061	0.0007	0.052446	213839_at	P	P	P	P	P	P	P	P	P	213839_at	10.7907	10.9509	10.1352	8.14255	8.23335	8.33433	9.38193	9.31985	9.09607
213988_s_at	Hs.28491.3	6303	SAT1	spermidine/spermine N1-acetyltransferase 1	Dampen: FDR p>0.05, |FC|>1.55 for rho(0αKG)/rho(0CTL)	-2.459	-5.49835	1e-05	0.000948	-1.727	-3.31039	0.0001	0.00322	0.731	1.65979	0.02075	0.249557	213988_s_at	P	P	P	P	P	P	P	P	P	213988_s_at	10.4412	9.8397	9.72825	7.20038	7.36494	8.06712	8.116	8.21553	8.49525
209034_at	g12751123	10957	PNRC1	proline-rich nuclear receptor coactivator 1	Dampen: FDR p>0.05, |FC|>1.55 for rho(0αKG)/rho(0CTL)	-2.467	-5.52893	0.0006	0.012806	-1.539	-2.90593	0.01057	0.061745	0.928	1.90264	0.08423	0.448153	209034_at	P	P	P	P	P	P	P	P	P	209034_at	10.0982	10.2652	10.2983	7.06051	7.05424	9.14498	8.59686	8.81085	8.63727
202499_s_at	g5902089	6515	SLC2A3	solute carrier family 2 (facilitated glucose transporter), member 3	Dampen: FDR p>0.05, |FC|>1.55 for rho(0αKG)/rho(0CTL)	-2.523	-5.74776	0.00018	0.00652	-1.211	-2.31498	0.01709	0.083983	1.313	2.48458	0.01148	0.19115	202499_s_at	P	P	P	P	P	P	P	P	P	202499_s_at	12.8596	12.9316	11.9828	9.5382	9.57829	11.0873	11.1899	11.3822	11.5702
232794_at	Hs.165175.0	153682	LOC153682	uncharacterized LOC153682	Dampen: FDR p>0.05, |FC|>1.55 for rho(0αKG)/rho(0CTL)	-2.526	-5.75973	0.00073	0.0143	-1.615	-3.06312	0.01074	0.06234	0.912	1.88165	0.10366	0.486739	232794_at	P	P	P	A	A	P	P	P	P	232794_at	6.73239	6.68608	7.2059	3.3936	3.90673	5.74586	5.16628	5.45996	5.15449
232720_at	Hs.26239.0	158038	LINGO2	leucine rich repeat and Ig domain containing 2	Dampen: FDR p>0.05, |FC|>1.55 for rho(0αKG)/rho(0CTL)	-2.586	-6.00432	0.00014	0.005596	-1.828	-3.55045	0.00161	0.018448	0.758	1.69114	0.09812	0.477105	232720_at	P	P	P	P	P	P	P	P	P	232720_at	7.97137	9.48877	9.86169	6.67164	6.67271	6.21947	7.25236	7.24764	7.33791
205066_s_at	g13324676	5167	ENPP1	ectonucleotide pyrophosphatase/phosphodiesterase 1	Dampen: FDR p>0.05, |FC|>1.55 for rho(0αKG)/rho(0CTL)	-2.597	-6.05027	0	0.000347	-1.741	-3.34267	2e-05	0.001349	0.855	1.80876	0.00353	0.110651	205066_s_at	P	P	P	P	P	P	P	P	P	205066_s_at	12.4921	12.381	12.9727	10.2478	10.1843	9.62388	10.7554	10.7554	11.1111
243868_at	Hs.163853.0	5991	RFX3	regulatory factor X, 3 (influences HLA class II expression)	Dampen: FDR p>0.05, |FC|>1.55 for rho(0αKG)/rho(0CTL)	-2.614	-6.12199	1e-05	0.001445	-1.784	-3.4438	0.00026	0.005819	0.83	1.77769	0.02424	0.266889	243868_at	P	P	P	P	P	P	P	P	P	243868_at	9.2231	9.06745	9.22158	6.30694	6.21639	7.14761	7.88739	7.47278	6.80123
203080_s_at	g7304922	29994	BAZ2B	bromodomain adjacent to zinc finger domain 2B	Dampen: FDR p>0.05, |FC|>1.55 for rho(0αKG)/rho(0CTL)	-2.667	-6.35107	0.00022	0.007212	-1.195	-2.28945	0.02586	0.109917	1.472	2.77406	0.00951	0.176202	203080_s_at	P	P	P	P	P	P	P	P	P	203080_s_at	9.15446	9.01777	9.53545	6.06479	5.89408	7.74897	8.26647	8.28701	7.56954
232081_at	Hs.6655.0	9619	ABCG1	ATP binding cassette subfamily G member 1	Dampen: FDR p>0.05, |FC|>1.55 for rho(0αKG)/rho(0CTL)	-2.729	-6.62996	1e-05	0.001205	-2.014	-4.03901	0.0001	0.003318	0.715	1.64148	0.04477	0.348807	232081_at	P	P	P	P	P	P	P	P	P	232081_at	9.44097	10.6038	10.63	7.1755	7.55521	7.7571	8.29677	8.03658	8.298
202498_s_at	Hs.7594.0	6515	SLC2A3	solute carrier family 2 (facilitated glucose transporter), member 3	Dampen: FDR p>0.05, |FC|>1.55 for rho(0αKG)/rho(0CTL)	-2.731	-6.63916	8e-05	0.004101	-1.647	-3.13182	0.0027	0.025706	1.085	2.12138	0.02449	0.267657	202498_s_at	P	P	P	P	P	P	P	P	P	202498_s_at	11.5976	11.3158	10.2172	7.87575	7.95481	9.1063	9.47336	9.47728	9.24006
228640_at	Hs.10338.0	5099	PCDH7	protocadherin 7	Dampen: FDR p>0.05, |FC|>1.55 for rho(0αKG)/rho(0CTL)	-2.756	-6.75521	0.00339	0.035673	-1.37	-2.58471	0.08142	0.229737	1.386	2.61353	0.07843	0.436432	228640_at	P	P	P	P	P	P	P	P	P	228640_at	7.32146	10.0587	8.91673	6.53459	6.76896	4.72518	7.67203	7.12597	7.38919
228952_at	Hs.25557.0	5167	ENPP1	ectonucleotide pyrophosphatase/phosphodiesterase 1	Dampen: FDR p>0.05, |FC|>1.55 for rho(0αKG)/rho(0CTL)	-2.793	-6.93069	0	0.000747	-2.106	-4.30496	4e-05	0.001786	0.687	1.60993	0.03721	0.32257	228952_at	P	P	P	P	P	P	P	P	P	228952_at	10.3651	10.1408	11.0529	8.2162	7.7308	7.23204	8.37394	8.39802	8.46805
202637_s_at	Hs.168383.0	3383	ICAM1	intercellular adhesion molecule 1	Dampen: FDR p>0.05, |FC|>1.55 for rho(0αKG)/rho(0CTL)	-2.879	-7.3564	1e-05	0.001184	-2.122	-4.35297	0.0001	0.003245	0.757	1.68997	0.04298	0.343154	202637_s_at	P	P	P	P	P	P	P	P	P	202637_s_at	12.561	12.6527	11.9822	9.85347	9.95514	8.75175	10.2889	10.0352	10.507
205651_x_at	g5901913	11069	RAPGEF4	Rap guanine nucleotide exchange factor 4	Dampen: FDR p>0.05, |FC|>1.55 for rho(0αKG)/rho(0CTL)	-2.911	-7.52139	0.00023	0.007369	-1.759	-3.38463	0.00601	0.042977	1.153	2.22376	0.04388	0.345935	205651_x_at	P	P	P	P	A	P	P	P	P	205651_x_at	7.48357	7.10675	6.5435	3.88183	3.28071	5.23769	5.65015	5.59142	4.61617
236480_at	Hs.154077.0	100506211	MIR210HG	MIR210 host gene	Narrow: FDR p<0.05, |FC|>1.55 for rho(0αKG)/rho(0CTL)	-2.968	-7.82451	0	0.000771	0.083	1.05922	0.78804	0.884802	3.051	8.28786	0	0.005172	236480_at	P	P	P	A	A	A	P	P	P	236480_at	9.47972	9.82526	8.45791	6.38403	6.11283	6.3629	9.18712	9.40033	9.42497
229088_at	Hs.44238.0	5167	ENPP1	ectonucleotide pyrophosphatase/phosphodiesterase 1	Dampen: FDR p>0.05, |FC|>1.55 for rho(0αKG)/rho(0CTL)	-3.01	-8.05564	0	0.000537	-2.273	-4.83327	2e-05	0.001218	0.737	1.66671	0.0262	0.275227	229088_at	P	P	P	P	P	P	P	P	P	229088_at	11.7859	11.793	12.4393	9.2934	9.33955	8.35603	9.6999	9.66868	9.83213
213006_at	Hs.76722.1	1052	CEBPD	CCAAT/enhancer binding protein (C/EBP), delta	Dampen: FDR p>0.05, |FC|>1.55 for rho(0αKG)/rho(0CTL)	-3.105	-8.60396	2e-05	0.001591	-2.331	-5.03154	0.00015	0.004073	0.775	1.71119	0.06692	0.408854	213006_at	P	P	P	A	A	A	A	A	P	213006_at	7.98619	7.92571	7.60899	4.19774	4.41968	5.58747	4.92956	5.66843	5.93049
229414_at	Hs.30514.0	26207	PITPNC1	phosphatidylinositol transfer protein, cytoplasmic 1	Dampen: FDR p>0.05, |FC|>1.55 for rho(0αKG)/rho(0CTL)	-3.237	-9.42832	0	0.000586	-1.747	-3.3566	0.00028	0.006128	1.491	2.81084	0.00086	0.057604	229414_at	P	P	P	A	P	P	P	P	P	229414_at	8.08146	8.57681	9.17024	5.05377	5.1773	5.88594	6.99715	7.01897	6.57277
221986_s_at	Hs.246875.1	54800	KLHL24	kelch-like family member 24	Dampen: FDR p>0.05, |FC|>1.55 for rho(0αKG)/rho(0CTL)	-3.262	-9.59312	0.00558	0.048306	-1.981	-3.94767	0.05548	0.18051	1.282	2.43176	0.18843	0.602613	221986_s_at	P	P	P	P	P	P	P	P	P	221986_s_at	9.93237	9.85949	9.71743	5.03006	5.46023	9.23173	7.94103	7.98923	7.63721
205266_at	g6006018	3976	LIF	leukemia inhibitory factor	Narrow: FDR p<0.05, |FC|>1.55 for rho(0αKG)/rho(0CTL)	-3.326	-10.0283	0	8.4e-05	1.924	3.79474	1e-05	0.000761	5.25	38.0546	0	7.5e-05	205266_at	P	P	P	A	A	A	P	P	P	205266_at	9.11077	9.34676	9.28199	5.43348	6.13872	6.18964	11.2828	11.3013	10.9282
230913_at	Hs.59525.0	9619	ABCG1	ATP binding cassette subfamily G member 1	Dampen: FDR p>0.05, |FC|>1.55 for rho(0αKG)/rho(0CTL)	-3.329	-10.0491	2e-05	0.001884	-2.174	-4.51273	0.00052	0.009002	1.154	2.2253	0.02097	0.250632	230913_at	P	P	P	A	A	P	P	P	P	230913_at	7.6027	8.66304	9.46592	4.99741	5.13207	5.61646	6.19596	6.23248	6.78096
230403_at	Hs.7154.0	5991	RFX3	regulatory factor X, 3 (influences HLA class II expression)	Dampen: FDR p>0.05, |FC|>1.55 for rho(0αKG)/rho(0CTL)	-3.366	-10.3102	2e-05	0.001768	-2.651	-6.28102	0.00012	0.003683	0.715	1.64148	0.11703	0.508223	230403_at	P	P	P	P	P	P	P	P	P	230403_at	10.5931	10.3353	10.7547	6.58802	6.90957	8.08598	8.42984	8.11127	7.18785
1558404_at	Hs2.265131.1	644242	LINC00622	long intergenic non-protein coding RNA 622	Narrow: FDR p<0.05, |FC|>1.55 for rho(0αKG)/rho(0CTL)	-3.387	-10.4614	0	5.4e-05	-1.848	-3.60001	1e-05	0.000671	1.539	2.90593	3e-05	0.01326	1558404_at	P	P	P	P	P	P	P	P	P	1558404_at	11.5856	10.9842	11.2998	7.78402	8.27053	7.65421	9.39939	9.45108	9.47545
205680_at	g4505204	4319	MMP10	matrix metallopeptidase 10	Dampen: FDR p>0.05, |FC|>1.55 for rho(0αKG)/rho(0CTL)	-3.481	-11.1657	3e-05	0.002246	-2.001	-4.00277	0.0016	0.018344	1.481	2.79142	0.0093	0.174528	205680_at	P	P	P	P	P	P	P	P	P	205680_at	10.4895	10.8352	10.3195	7.69421	7.56286	5.94271	8.2019	8.2909	9.14894
1562474_at	Hs2.386380.1	101929147	LOC101929147	uncharacterized LOC101929147	Dampen: FDR p>0.05, |FC|>1.55 for rho(0αKG)/rho(0CTL)	-3.9	-14.9285	0	2e-06	-3.267	-9.62642	0	4e-06	0.634	1.55186	0.0007	0.0523	1562474_at	P	P	P	P	P	P	P	P	P	1562474_at	11.1232	11.5221	11.3949	7.45371	7.47188	7.41364	8.06233	8.13469	8.04285
202638_s_at	g4557877	3383	ICAM1	intercellular adhesion molecule 1	Dampen: FDR p>0.05, |FC|>1.55 for rho(0αKG)/rho(0CTL)	-3.927	-15.2105	0	0.000269	-2.97	-7.83536	1e-05	0.000612	0.957	1.94127	0.01276	0.200961	202638_s_at	P	P	P	P	P	P	P	P	P	202638_s_at	10.967	11.1727	10.5044	7.21353	7.43433	6.2151	7.77119	7.82069	8.14235
202859_x_at	g10834977	3576	CXCL8	chemokine (C-X-C motif) ligand 8	Dampen: FDR p>0.05, |FC|>1.55 for rho(0αKG)/rho(0CTL)	-3.968	-15.649	2e-05	0.001767	-2.83	-7.11074	0.00026	0.005765	1.138	2.20076	0.04394	0.346175	202859_x_at	P	P	P	P	P	P	P	P	P	202859_x_at	12.7375	12.7562	12.2979	9.08323	9.45481	7.34909	10.0121	10.034	9.25561
226237_at	Hs.41271.0	1295	COL8A1	collagen, type VIII, alpha 1	Dampen: FDR p>0.05, |FC|>1.55 for rho(0αKG)/rho(0CTL)	-4.932	-30.5267	0	6.5e-05	-3.925	-15.1895	0	0.000159	1.007	2.00973	0.00793	0.16125	226237_at	P	P	P	P	P	P	P	P	P	226237_at	11.2553	10.8882	10.4563	5.73607	6.47313	5.59474	7.01033	6.52866	7.28473
218541_s_at	g9910147	56892	C8orf4	chromosome 8 open reading frame 4	Dampen: FDR p>0.05, |FC|>1.55 for rho(0αKG)/rho(0CTL)	-5.655	-50.3877	0	0.000176	-3.792	-13.8518	1e-05	0.000719	1.863	3.63763	0.00141	0.07163	218541_s_at	P	P	P	A	A	M	P	P	P	218541_s_at	8.68562	10.0203	10.1867	3.50245	3.96777	4.45766	5.58431	6.30739	5.62576

## Sheet: aKG Enhance Effect
Probe Set ID	Transcript ID (Array Design)	Entrez Gene	Gene Symbol	Gene Title	aKG Effect w.r.t rho(0CTL)/rho(+)	log2FC rho(0CTL)/rho(+)	Fold-Change rho(0CTL)/rho(+)	p.value (Rho+ vs Rho0_Ctl)	FDR (Rho+ vs Rho0_Ctl)	log2FC rho(0αKG)/rho(+)	Fold-Change rho(0αKG)/rho(+)	p.value (Rho+ vs Rho0_KG)	FDR (Rho+ vs Rho0_KG)	log2FC rho(0αKG)/rho(0CTL)	Fold-Change rho(0αKG)/rho(0CTL)	p.value (Rho0_KG vs Rho0_Ctl)	FDR (Rho0_KG vs Rho0_Ctl)	Probe Set ID	18911_Rho+ Detection Call	18912_Rho+ Detection Call	18913_Rho+ Detection Call	18914_Rho0_Ctl Detection Call	18915_Rho0_Ctl Detection Call	18916_Rho0_Ctl Detection Call	18917_Rho0+alpha_KG Detection Call	18918_Rho0+alpha_KG Detection Call	18919_Rho0+alpha_KG Detection Call	Probe Set ID	18911_Rho+ RMA	18912_Rho+ RMA	18913_Rho+ RMA	18914_Rho0_Ctl RMA	18915_Rho0_Ctl RMA	18916_Rho0_Ctl RMA	18917_Rho0+alpha_KG RMA	18918_Rho0+alpha_KG RMA	18919_Rho0+alpha_KG RMA
243301_at	Hs.122254.0	169044	COL22A1	collagen, type XXII, alpha 1	Boost: FDR p>0.05, |FC|>1.55 for rho(0αKG)/rho(0CTL)	5.001	32.0222	0	3.9e-05	5.736	53.2976	0	1.4e-05	0.736	1.66555	0.02471	0.268853	243301_at	P	P	P	P	P	P	P	P	P	243301_at	5.22771	5.27007	4.16385	10.0687	9.87829	9.71668	10.5752	10.5259	10.7694
206432_at	g4885390	3037	HAS2	hyaluronan synthase 2	Boost: FDR p>0.05, |FC|>1.55 for rho(0αKG)/rho(0CTL)	4.516	22.8798	1e-05	0.001462	5.511	45.6012	0	0.000437	0.995	1.99308	0.09422	0.46974	206432_at	P	A	P	P	P	P	P	P	P	206432_at	5.09915	4.92738	6.31221	10.6448	10.5637	8.67882	10.7558	11.0033	11.1134
230372_at	Hs.133022.0	3037	HAS2	hyaluronan synthase 2	Boost: FDR p>0.05, |FC|>1.55 for rho(0αKG)/rho(0CTL)	4.512	22.8164	0.00018	0.006411	5.891	59.3428	2e-05	0.001355	1.379	2.60088	0.09474	0.470905	230372_at	P	A	P	P	P	P	P	P	P	230372_at	4.85156	4.71648	7.16483	10.8727	10.802	8.59319	11.2778	11.4953	11.6325
228873_at	Hs.128644.0	169044	COL22A1	collagen, type XXII, alpha 1	Boost: FDR p>0.05, |FC|>1.55 for rho(0αKG)/rho(0CTL)	3.719	13.1683	4e-05	0.002641	4.664	25.3515	1e-05	0.00069	0.945	1.92519	0.09085	0.462764	228873_at	A	P	P	P	P	P	P	P	P	228873_at	5.33168	5.80939	6.8877	10.5361	9.95282	8.69654	10.322	10.8909	10.8079
209909_s_at	g339549	7042	TGFB2	transforming growth factor beta 2	Boost: FDR p>0.05, |FC|>1.55 for rho(0αKG)/rho(0CTL)	3.513	11.4161	0.0039	0.039014	4.778	27.436	0.00054	0.009165	1.265	2.40327	0.1985	0.613082	209909_s_at	P	A	P	P	P	P	P	P	P	209909_s_at	5.61128	4.27313	6.42061	10.2427	10.0509	6.54969	10.1194	10.1216	10.3982
220407_s_at	g4507462	7042	TGFB2	transforming growth factor beta 2	Boost: FDR p>0.05, |FC|>1.55 for rho(0αKG)/rho(0CTL)	3.503	11.3373	0.00032	0.008936	4.427	21.511	6e-05	0.002281	0.925	1.89868	0.17088	0.58111	220407_s_at	P	A	P	P	P	P	P	P	P	220407_s_at	4.1695	3.71254	4.45329	8.5634	8.44908	5.83077	8.52696	8.47155	8.61907
211756_at	g13543620	5744	PTHLH	parathyroid hormone-like hormone	Boost: FDR p>0.05, |FC|>1.55 for rho(0αKG)/rho(0CTL)	3.48	11.1579	4e-05	0.002488	4.769	27.2654	0	0.000437	1.289	2.44359	0.02065	0.249046	211756_at	P	P	P	P	P	P	P	P	P	211756_at	5.57396	6.3134	5.80638	9.82985	10.181	8.1222	10.617	10.74	10.6425
206300_s_at	g4506268	5744	PTHLH	parathyroid hormone-like hormone	Boost: FDR p>0.05, |FC|>1.55 for rho(0αKG)/rho(0CTL)	3.267	9.62642	4e-05	0.00256	4.769	27.2654	0	0.000337	1.502	2.83235	0.00726	0.155086	206300_s_at	A	A	A	P	P	P	P	P	P	206300_s_at	4.88473	5.25822	4.48851	8.58649	8.86689	6.97925	9.46664	9.72533	9.74605
219773_at	g8393842	50507	NOX4	NADPH oxidase 4	Boost: FDR p>0.05, |FC|>1.55 for rho(0αKG)/rho(0CTL)	3.212	9.26634	0.0014	0.020825	5.258	38.2662	4e-05	0.001848	2.046	4.12959	0.01775	0.233355	219773_at	P	P	P	P	P	P	P	P	P	219773_at	6.17346	4.76679	7.19291	10.058	10.007	7.70505	11.2701	11.2653	11.373
238914_at	Hs.162025.0	1630	DCC	DCC netrin 1 receptor	Boost: FDR p>0.05, |FC|>1.55 for rho(0αKG)/rho(0CTL)	3.058	8.32817	0	0.000577	3.732	13.2875	0	0.000165	0.674	1.59549	0.04239	0.340818	238914_at	A	A	P	P	P	P	P	P	P	238914_at	4.81717	4.16891	5.41217	7.73676	8.21259	7.62427	8.49325	8.55436	8.54756
230188_at	Hs.4285.0	348938	NIPAL4	NIPA-like domain containing 4	Boost: FDR p>0.05, |FC|>1.55 for rho(0αKG)/rho(0CTL)	2.993	7.96128	0.00087	0.015829	4.854	28.9201	2e-05	0.001392	1.861	3.63259	0.01412	0.210164	230188_at	A	A	P	P	P	P	P	P	P	230188_at	6.55185	5.5	6.34352	10.0624	9.86448	7.44729	10.8174	10.9647	11.1754
52255_s_at	4826393_RC	50509	COL5A3	collagen, type V, alpha 3	Boost: FDR p>0.05, |FC|>1.55 for rho(0αKG)/rho(0CTL)	2.946	7.7061	0.00048	0.011161	3.6	12.1257	0.00011	0.003457	0.654	1.57352	0.26719	0.676087	52255_s_at	P	A	A	P	P	A	P	P	P	52255_s_at	5.27426	5.06624	5.16056	8.76714	9.04391	6.52831	8.51535	8.71257	9.07316
231325_at	Hs.22123.0	137970	UNC5D	unc-5 netrin receptor D	Boost: FDR p>0.05, |FC|>1.55 for rho(0αKG)/rho(0CTL)	2.935	7.64756	2e-05	0.001809	3.675	12.7728	0	0.000476	0.74	1.67018	0.07079	0.419067	231325_at	P	P	P	P	P	P	P	P	P	231325_at	4.92979	5.47694	6.29638	8.48499	9.08919	7.9331	9.24343	9.15078	9.33284
213725_x_at	Hs.22907.0	64131	XYLT1	xylosyltransferase I	Boost: FDR p>0.05, |FC|>1.55 for rho(0αKG)/rho(0CTL)	2.727	6.62077	0.00017	0.006095	4.005	16.0555	1e-05	0.000788	1.278	2.42503	0.01777	0.233355	213725_x_at	P	P	P	P	P	P	P	P	P	213725_x_at	7.29133	8.39077	8.87655	11.2852	11.4237	10.0307	12.2105	12.1784	12.1849
210355_at	g190705	5744	PTHLH	parathyroid hormone-like hormone	Widen: FDR p<0.05, |FC|>1.55 for rho(0αKG)/rho(0CTL)	2.606	6.08813	0	0.000792	4.314	19.8904	0	6.2e-05	1.707	3.26481	0.00012	0.025656	210355_at	P	P	P	P	P	P	P	P	P	210355_at	5.83452	6.66509	6.34861	9.10864	9.19329	8.36469	10.7401	10.6432	10.4057
218469_at	g7019348	26585	GREM1	gremlin 1, DAN family BMP antagonist	Boost: FDR p>0.05, |FC|>1.55 for rho(0αKG)/rho(0CTL)	2.566	5.92165	0.00069	0.013796	3.304	9.8765	0.00011	0.003436	0.738	1.66786	0.17934	0.592022	218469_at	P	P	P	P	P	P	P	P	P	218469_at	9.66941	9.66606	10.9191	13.3372	13.1967	11.4191	13.3714	13.427	13.369
209955_s_at	g1924981	2191	FAP	fibroblast activation protein alpha	Boost: FDR p>0.05, |FC|>1.55 for rho(0αKG)/rho(0CTL)	2.443	5.43771	5e-05	0.003186	4.089	17.0181	0	0.00024	1.646	3.12965	0.00094	0.059946	209955_s_at	A	A	A	P	P	P	P	P	P	209955_s_at	5.73178	5.15348	5.4936	8.59289	7.96881	7.14682	9.57742	9.86205	9.20681
202627_s_at	Hs.82085.0	5054	SERPINE1	serpin peptidase inhibitor, clade E (nexin, plasminogen activator inhibitor type 1), member 1	Widen: FDR p<0.05, |FC|>1.55 for rho(0αKG)/rho(0CTL)	2.34	5.06303	0	0.000183	3.565	11.8351	0	1.5e-05	1.225	2.33755	6e-05	0.019134	202627_s_at	P	P	P	P	P	P	P	P	P	202627_s_at	10.6504	10.0993	10.1465	12.7213	12.6912	12.5039	13.9536	13.6631	13.9736
216081_at	Hs.306904.0	3910	LAMA4	laminin, alpha 4	Boost: FDR p>0.05, |FC|>1.55 for rho(0αKG)/rho(0CTL)	2.334	5.04201	0	0.000727	3.227	9.36319	0	0.00013	0.893	1.85703	0.00404	0.117521	216081_at	A	A	P	P	P	P	P	P	P	216081_at	4.34431	5.10896	4.99515	7.20802	7.23554	7.00726	7.65083	8.18459	8.2952
217312_s_at	Hs.1640.1	1294	COL7A1	collagen, type VII, alpha 1	Boost: FDR p>0.05, |FC|>1.55 for rho(0αKG)/rho(0CTL)	2.325	5.01066	0.00051	0.011542	3.39	10.4831	3e-05	0.001575	1.065	2.09217	0.03858	0.327417	217312_s_at	A	A	M	P	P	A	P	P	P	217312_s_at	5.94289	5.69289	6.77156	9.09833	8.86154	7.423	9.16399	9.73877	9.67602
204136_at	g4502960	1294	COL7A1	collagen, type VII, alpha 1	Boost: FDR p>0.05, |FC|>1.55 for rho(0αKG)/rho(0CTL)	2.304	4.93825	0.00087	0.015755	3.507	11.3687	4e-05	0.001847	1.203	2.30218	0.03108	0.297478	204136_at	P	P	P	P	P	P	P	P	P	204136_at	7.92777	7.93512	8.64842	11.2124	10.9621	9.24865	11.3176	11.7167	11.9967
202669_s_at	g902370	1948	EFNB2	ephrin-B2	Boost: FDR p>0.05, |FC|>1.55 for rho(0αKG)/rho(0CTL)	2.187	4.55358	5e-05	0.002873	2.91	7.51618	0	0.000574	0.724	1.65176	0.03841	0.326674	202669_s_at	P	P	P	P	P	P	P	P	P	202669_s_at	7.89998	8.33967	7.69324	10.5557	10.4964	9.44039	11.06	10.6877	10.9156
229800_at	Hs.48713.0	9201	DCLK1	doublecortin-like kinase 1	Boost: FDR p>0.05, |FC|>1.55 for rho(0αKG)/rho(0CTL)	2.127	4.36808	0.00286	0.032322	2.935	7.64756	0.00034	0.006825	0.808	1.75078	0.15775	0.565512	229800_at	P	P	P	P	P	P	P	P	P	229800_at	7.31397	8.26435	7.48048	10.4367	10.606	8.39833	10.4938	10.6088	10.7609
215066_at	Hs.287592.0	5792	PTPRF	protein tyrosine phosphatase, receptor type, F	Boost: FDR p>0.05, |FC|>1.55 for rho(0αKG)/rho(0CTL)	2.126	4.36506	0	0.00083	2.901	7.46944	0	0.000159	0.775	1.71119	0.00648	0.147325	215066_at	A	P	A	P	P	P	P	P	P	215066_at	5.34624	5.79596	5.45743	7.86355	7.36388	7.74948	8.20461	8.86736	8.23134
236044_at	Hs.40479.0	196051	PLPP4	phospholipid phosphatase 4	Boost: FDR p>0.05, |FC|>1.55 for rho(0αKG)/rho(0CTL)	2.1	4.28709	0.00095	0.016692	3.024	8.1342	7e-05	0.002555	0.924	1.89737	0.06265	0.397698	236044_at	P	P	P	P	P	P	P	P	P	236044_at	6.33686	5.68641	7.41346	9.02382	8.88917	7.82387	9.54112	9.3506	9.61839
1559400_s_at	Hs2.423154.1	5069	PAPPA	pregnancy-associated plasma protein A, pappalysin 1	Boost: FDR p>0.05, |FC|>1.55 for rho(0αKG)/rho(0CTL)	2.099	4.28412	2e-05	0.001534	2.849	7.20501	0	0.000289	0.75	1.68179	0.01485	0.215291	1559400_s_at	P	P	P	P	P	P	P	P	P	1559400_s_at	8.80214	9.08482	9.54874	11.324	11.6556	10.7525	12.0204	11.9033	12.0576
232574_at	Hs.302736.0	64131	XYLT1	xylosyltransferase I	Widen: FDR p<0.05, |FC|>1.55 for rho(0αKG)/rho(0CTL)	2.089	4.25453	6e-05	0.003432	3.648	12.536	0	0.000213	1.559	2.9465	0.00052	0.046298	232574_at	A	A	A	P	P	P	P	P	P	232574_at	6.68175	7.11518	6.92125	9.43779	9.29838	8.24922	10.4306	10.4004	10.8304
201981_at	Hs.75874.0	5069	PAPPA	pregnancy-associated plasma protein A, pappalysin 1	Boost: FDR p>0.05, |FC|>1.55 for rho(0αKG)/rho(0CTL)	1.933	3.81848	0.00115	0.018665	2.725	6.6116	0.0001	0.003229	0.792	1.73147	0.08714	0.454946	201981_at	P	P	P	P	P	P	P	P	P	201981_at	7.19129	7.51798	8.85892	10.1337	10.0439	9.1899	10.4571	10.5068	10.7787
225867_at	Hs.102267.1	114990	VASN	vasorin	Boost: FDR p>0.05, |FC|>1.55 for rho(0αKG)/rho(0CTL)	1.91	3.75809	0.00017	0.006206	2.852	7.22001	1e-05	0.000739	0.941	1.91986	0.01425	0.211198	225867_at	A	A	A	P	P	M	P	P	P	225867_at	5.37996	5.59142	5.59805	7.76578	7.93865	6.59615	8.4371	8.15569	8.53122
224940_s_at	Hs.250655.4	5069	PAPPA	pregnancy-associated plasma protein A, pappalysin 1	Boost: FDR p>0.05, |FC|>1.55 for rho(0αKG)/rho(0CTL)	1.889	3.70378	0.005	0.0453	2.838	7.15028	0.00036	0.007155	0.949	1.93053	0.09673	0.474527	224940_s_at	P	P	P	P	P	P	P	P	P	224940_s_at	7.55666	8.34909	9.69825	10.6815	10.9367	9.65277	11.2052	11.2479	11.6639
231618_s_at	Hs.123656.0	256979	SUN3	Sad1 and UNC84 domain containing 3	Widen: FDR p<0.05, |FC|>1.55 for rho(0αKG)/rho(0CTL)	1.875	3.66802	0	0.000182	2.961	7.78663	0	1.2e-05	1.086	2.12285	2e-05	0.013234	231618_s_at	A	A	A	P	P	P	P	P	P	231618_s_at	5.9628	5.859	6.17411	7.73551	7.83393	8.05174	9.07461	8.96506	8.8392
202149_at	Hs.80261.0	4739	NEDD9	neural precursor cell expressed, developmentally down-regulated 9	Widen: FDR p<0.05, |FC|>1.55 for rho(0αKG)/rho(0CTL)	1.858	3.62505	0.0028	0.031926	5.253	38.1338	0	0.00028	3.395	10.5195	4e-05	0.016698	202149_at	P	P	P	P	P	P	P	P	P	202149_at	5.21515	4.39544	6.37961	6.75597	7.61182	7.19626	10.9447	10.6508	10.1542
204537_s_at	g12707559	2564	GABRE	gamma-aminobutyric acid (GABA) A receptor, epsilon	Boost: FDR p>0.05, |FC|>1.55 for rho(0αKG)/rho(0CTL)	1.856	3.62003	0.00079	0.014979	2.908	7.50577	3e-05	0.001519	1.052	2.0734	0.02046	0.248412	204537_s_at	P	P	P	P	P	P	P	P	P	204537_s_at	7.60044	7.18988	7.97645	10.1205	9.68231	8.53117	10.2529	10.7114	10.5254
204790_at	g5174516	4092	SMAD7	SMAD family member 7	Boost: FDR p>0.05, |FC|>1.55 for rho(0αKG)/rho(0CTL)	1.838	3.57514	0.00115	0.018665	3.042	8.23632	3e-05	0.001524	1.204	2.30378	0.01337	0.204907	204790_at	P	P	P	P	P	P	P	P	P	204790_at	5.94083	6.15333	7.64986	8.40606	8.65874	8.19354	9.705	9.7972	9.36892
224942_at	Hs.250655.4	5069	PAPPA	pregnancy-associated plasma protein A, pappalysin 1	Boost: FDR p>0.05, |FC|>1.55 for rho(0αKG)/rho(0CTL)	1.813	3.51372	0.00195	0.0255	2.685	6.43081	0.00013	0.003757	0.872	1.8302	0.06767	0.410903	224942_at	P	P	P	P	P	P	P	P	P	224942_at	7.79987	7.41619	9.2178	10.4033	9.98992	9.48062	10.8724	10.7189	10.8978
219257_s_at	g11464966	8877	SPHK1	sphingosine kinase 1	Boost: FDR p>0.05, |FC|>1.55 for rho(0αKG)/rho(0CTL)	1.806	3.49671	8e-05	0.003952	2.592	6.02934	0	0.000557	0.786	1.72429	0.01542	0.219687	219257_s_at	P	P	P	P	P	P	P	P	P	219257_s_at	8.58234	9.05613	9.10761	11.0385	10.9963	10.1301	11.4043	11.3337	11.7839
226372_at	Hs.64001.0	50515	CHST11	carbohydrate (chondroitin 4) sulfotransferase 11	Boost: FDR p>0.05, |FC|>1.55 for rho(0αKG)/rho(0CTL)	1.788	3.45336	0.00166	0.023147	3.017	8.09483	4e-05	0.001805	1.228	2.34242	0.01398	0.209078	226372_at	P	P	P	P	P	P	P	P	P	226372_at	7.55848	8.65278	8.72731	10.4429	10.6393	9.22141	11.1852	11.4098	11.3937
228128_x_at	Hs.250655.5	5069	PAPPA	pregnancy-associated plasma protein A, pappalysin 1	Boost: FDR p>0.05, |FC|>1.55 for rho(0αKG)/rho(0CTL)	1.774	3.42001	0.00481	0.044336	2.745	6.7039	0.00028	0.006066	0.971	1.9602	0.07239	0.422842	228128_x_at	P	P	P	P	P	P	P	P	P	228128_x_at	8.06887	8.36472	10.1282	10.8223	10.9723	10.0898	11.5066	11.6129	11.6788
214702_at	Hs.321592.0	2335	FN1	fibronectin 1	Boost: FDR p>0.05, |FC|>1.55 for rho(0αKG)/rho(0CTL)	1.767	3.40345	0.00553	0.048073	3.557	11.7697	5e-05	0.002025	1.79	3.45815	0.00513	0.133265	214702_at	M	A	A	P	P	P	P	P	P	214702_at	4.17312	4.71583	3.8131	6.80874	6.45712	4.73649	7.4353	8.01407	7.92255
219634_at	g8923757	50515	CHST11	carbohydrate (chondroitin 4) sulfotransferase 11	Boost: FDR p>0.05, |FC|>1.55 for rho(0αKG)/rho(0CTL)	1.761	3.38933	0.00064	0.013309	2.729	6.62996	2e-05	0.001392	0.968	1.95613	0.02047	0.248412	219634_at	P	P	P	P	P	P	P	P	P	219634_at	8.83244	9.37227	8.83244	11.1965	11.2266	9.89819	11.6902	11.5164	12.0182
221011_s_at	g13569871	81606	LBH	limb bud and heart development	Boost: FDR p>0.05, |FC|>1.55 for rho(0αKG)/rho(0CTL)	1.731	3.31958	0.00038	0.009966	3.041	8.23061	0	0.000603	1.31	2.47942	0.00245	0.092815	221011_s_at	P	P	P	P	P	P	P	P	P	221011_s_at	8.24541	6.90627	8.23229	9.53107	9.57376	9.47129	10.83	10.9377	10.7379
1568765_at	Hs2.400429.1	5054	SERPINE1	serpin peptidase inhibitor, clade E (nexin, plasminogen activator inhibitor type 1), member 1	Widen: FDR p<0.05, |FC|>1.55 for rho(0αKG)/rho(0CTL)	1.731	3.31958	0.00091	0.016219	3.905	14.9804	0	0.000338	2.174	4.51273	0.00018	0.029391	1568765_at	P	P	P	P	P	P	P	P	P	1568765_at	6.06879	7.30105	6.08808	8.01739	7.8823	8.75107	10.0837	10.4691	10.6189
1569362_at	Hs2.435844.1	214	ALCAM	activated leukocyte cell adhesion molecule	Widen: FDR p<0.05, |FC|>1.55 for rho(0αKG)/rho(0CTL)	1.726	3.30809	3e-05	0.002172	2.982	7.90081	0	0.000146	1.255	2.38667	0.00031	0.036344	1569362_at	P	P	P	P	P	P	P	P	P	1569362_at	5.45451	4.9996	4.56458	6.50843	6.66941	7.01956	7.95725	7.98381	8.02238
222162_s_at	Hs.8230.1	9510	ADAMTS1	ADAM metallopeptidase with thrombospondin type 1 motif 1	Widen: FDR p<0.05, |FC|>1.55 for rho(0αKG)/rho(0CTL)	1.7	3.24901	0.00267	0.031153	4.156	17.8271	0	0.000511	2.456	5.48693	0.00022	0.031728	222162_s_at	P	P	P	P	P	P	P	P	P	222162_s_at	7.58794	7.18265	6.57746	9.22527	9.42765	7.79638	11.4146	11.0326	11.3691
214255_at	Hs.44697.0	57194	ATP10A	ATPase, class V, type 10A	Boost: FDR p>0.05, |FC|>1.55 for rho(0αKG)/rho(0CTL)	1.698	3.24451	0.00335	0.035445	2.551	5.8604	0.00022	0.005261	0.853	1.80625	0.07813	0.435735	214255_at	A	A	A	P	P	M	P	P	P	214255_at	5.28747	5.04391	5.45603	7.34222	7.7797	5.75905	7.86941	7.73515	7.83642
235548_at	Hs.119286.0	164284	APCDD1L	adenomatosis polyposis coli down-regulated 1-like	Boost: FDR p>0.05, |FC|>1.55 for rho(0αKG)/rho(0CTL)	1.671	3.18435	1e-05	0.000997	2.53	5.77572	0	0.000122	0.859	1.81378	0.00104	0.063149	235548_at	P	P	P	P	P	P	P	P	P	235548_at	5.94546	5.81443	6.17617	7.67406	7.98735	7.28649	8.55089	8.48884	8.48548
243611_at	Hs.97459.0	84953	MICALCL	MICAL C-terminal like	Widen: FDR p<0.05, |FC|>1.55 for rho(0αKG)/rho(0CTL)	1.671	3.18435	0.00035	0.009391	3.485	11.1967	0	0.000273	1.814	3.51616	0.00019	0.03002	243611_at	A	A	A	P	P	P	P	P	P	243611_at	5.32499	6.02343	5.81197	7.86812	7.59877	6.70746	9.432	9.17856	9.00525
220698_at	g13236554	79160	LOC79160	uncharacterized LOC79160	Boost: FDR p>0.05, |FC|>1.55 for rho(0αKG)/rho(0CTL)	1.66	3.16017	0.00096	0.016809	3.024	8.1342	1e-05	0.000915	1.363	2.57219	0.00334	0.108075	220698_at	A	A	A	P	P	P	P	P	P	220698_at	5.6238	5.51848	5.82247	7.75156	7.81999	6.37427	8.42836	8.76645	8.84126
220866_at	g7656868	11174	ADAMTS6	ADAM metallopeptidase with thrombospondin type 1 motif 6	Boost: FDR p>0.05, |FC|>1.55 for rho(0αKG)/rho(0CTL)	1.612	3.05675	0.00474	0.043963	3.125	8.72406	5e-05	0.002111	1.513	2.85403	0.00676	0.149989	220866_at	A	A	A	P	P	A	P	P	P	220866_at	4.69134	4.32444	3.66428	6.59015	6.14314	4.78137	7.57521	7.23812	7.24127
222486_s_at	g5725505	9510	ADAMTS1	ADAM metallopeptidase with thrombospondin type 1 motif 1	Widen: FDR p<0.05, |FC|>1.55 for rho(0αKG)/rho(0CTL)	1.601	3.03354	0.00323	0.034762	3.743	13.3892	1e-05	0.000701	2.142	4.41373	0.00048	0.044408	222486_s_at	P	P	P	P	P	P	P	P	P	222486_s_at	9.02652	7.81215	7.78629	10.2251	10.2015	9.00148	12.0842	11.7358	12.0339
235471_at	Hs.132950.0	196740	VSTM4	V-set and transmembrane domain containing 4	Boost: FDR p>0.05, |FC|>1.55 for rho(0αKG)/rho(0CTL)	1.562	2.95263	0.00105	0.017722	2.61	6.10504	2e-05	0.00138	1.048	2.06766	0.01114	0.188789	235471_at	P	A	M	P	P	P	P	P	P	235471_at	5.43665	4.64067	4.49916	6.91131	6.54898	5.80311	7.71725	7.55776	7.13126
201982_s_at	g4505606	5069	PAPPA	pregnancy-associated plasma protein A, pappalysin 1	Boost: FDR p>0.05, |FC|>1.55 for rho(0αKG)/rho(0CTL)	1.525	2.87787	8e-05	0.004142	2.237	4.71416	0	0.000529	0.712	1.63807	0.01156	0.192051	201982_s_at	P	P	P	P	P	P	P	P	P	201982_s_at	6.82838	6.80317	7.37734	8.7877	8.65453	8.14275	9.01398	9.21093	9.49572
210762_s_at	g2559001	10395	DLC1	DLC1 Rho GTPase activating protein	Widen: FDR p<0.05, |FC|>1.55 for rho(0αKG)/rho(0CTL)	1.507	2.84218	3e-05	0.00238	2.57	5.93809	0	0.000167	1.063	2.08927	0.00044	0.042945	210762_s_at	P	P	P	P	P	P	P	P	P	210762_s_at	8.86357	8.40719	8.07464	9.83354	9.94338	10.0898	11.1978	10.9714	10.8865
222874_s_at	g6467260	2055	CLN8	ceroid-lipofuscinosis, neuronal 8	Boost: FDR p>0.05, |FC|>1.55 for rho(0αKG)/rho(0CTL)	1.407	2.65185	0.0044	0.041953	2.132	4.38325	0.00029	0.006204	0.724	1.65176	0.08391	0.447717	222874_s_at	P	P	A	P	P	P	P	P	P	222874_s_at	6.46185	6.50942	6.03845	8.40989	8.06037	6.76181	8.50329	8.22535	8.67663
227399_at	Hs.30343.0	389136	VGLL3	vestigial-like family member 3	Boost: FDR p>0.05, |FC|>1.55 for rho(0αKG)/rho(0CTL)	1.377	2.59728	0.00357	0.036876	2.639	6.229	4e-05	0.001781	1.262	2.39828	0.00592	0.141357	227399_at	P	P	P	P	P	P	P	P	P	227399_at	8.56838	7.86083	9.37498	10.0622	10.3575	9.51673	11.3084	11.3211	11.093
226368_at	Hs.64001.0	50515	CHST11	carbohydrate (chondroitin 4) sulfotransferase 11	Boost: FDR p>0.05, |FC|>1.55 for rho(0αKG)/rho(0CTL)	1.371	2.5865	0.00071	0.01411	2.415	5.33319	1e-05	0.000862	1.044	2.06194	0.00401	0.117085	226368_at	P	P	P	P	P	P	P	P	P	226368_at	9.34485	9.25269	9.44335	10.8288	11.259	10.065	11.8083	11.9839	11.4926
233888_s_at	Hs.18995.1	57522	SRGAP1	SLIT-ROBO Rho GTPase activating protein 1	Boost: FDR p>0.05, |FC|>1.55 for rho(0αKG)/rho(0CTL)	1.367	2.57934	0.00026	0.007894	2.212	4.63317	1e-05	0.000677	0.845	1.79626	0.00589	0.140906	233888_s_at	P	P	P	P	P	P	P	P	P	233888_s_at	9.16562	9.1515	9.54102	10.9166	10.9788	10.0643	11.5104	11.5328	11.4505
218880_at	Hs.325364.0	2355	FOSL2	FOS-like antigen 2	Boost: FDR p>0.05, |FC|>1.55 for rho(0αKG)/rho(0CTL)	1.34	2.53151	0.00113	0.018466	2.19	4.56305	3e-05	0.001598	0.85	1.8025	0.01544	0.219769	218880_at	P	P	P	P	P	P	P	P	P	218880_at	9.10663	8.27689	8.13351	9.64608	9.53744	10.3527	10.7418	10.7785	10.5654
226726_at	Hs.15641.0	129642	MBOAT2	membrane bound O-acyltransferase domain containing 2	Boost: FDR p>0.05, |FC|>1.55 for rho(0αKG)/rho(0CTL)	1.337	2.52625	0.00015	0.005752	2.103	4.29602	0	0.000557	0.765	1.69937	0.00595	0.141869	226726_at	P	P	P	P	P	P	P	P	P	226726_at	8.27179	9.11742	8.75256	10.2434	10.1176	9.7929	10.9078	10.848	10.6938
222085_at	Hs.27373.1	105370977	LOC105370977	uncharacterized LOC105370977	Boost: FDR p>0.05, |FC|>1.55 for rho(0αKG)/rho(0CTL)	1.316	2.48975	0.00015	0.005745	2.043	4.12102	0	0.000582	0.727	1.65519	0.00721	0.154755	222085_at	P	P	M	P	P	P	P	P	P	222085_at	7.656	8.06388	7.83813	9.42703	9.35556	8.72273	9.79364	9.75598	10.1365
205289_at	Hs.73853.0	650	BMP2	bone morphogenetic protein 2	Boost: FDR p>0.05, |FC|>1.55 for rho(0αKG)/rho(0CTL)	1.311	2.48113	0.0003	0.008609	2.004	4.01111	1e-05	0.000948	0.693	1.61664	0.01484	0.215249	205289_at	P	P	P	P	P	P	P	P	P	205289_at	9.21696	9.33347	9.65402	10.9027	11.0682	10.1666	11.3511	11.3217	11.5434
230097_at	Hs.144097.0	2618	GART	phosphoribosylglycinamide formyltransferase, phosphoribosylglycinamide synthetase, phosphoribosylaminoimidazole synthetase	Boost: FDR p>0.05, |FC|>1.55 for rho(0αKG)/rho(0CTL)	1.288	2.44189	0.00012	0.005085	2.051	4.14393	0	0.000448	0.763	1.69702	0.00402	0.117122	230097_at	P	P	P	P	P	P	P	P	P	230097_at	7.35141	7.16427	7.61577	8.77344	8.24333	8.97929	9.44578	9.51599	9.32318
1555875_at	Hs2.422911.1	57522	SRGAP1	SLIT-ROBO Rho GTPase activating protein 1	Boost: FDR p>0.05, |FC|>1.55 for rho(0αKG)/rho(0CTL)	1.251	2.38006	0.00169	0.023404	2.219	4.65571	3e-05	0.001477	0.968	1.95613	0.00772	0.158825	1555875_at	P	P	P	P	P	P	P	P	P	1555875_at	7.57597	7.33856	7.87806	9.03758	9.36327	8.14576	9.8297	9.71848	9.90199
221880_s_at	Hs.27373.0	400451	FAM174B	family with sequence similarity 174, member B	Boost: FDR p>0.05, |FC|>1.55 for rho(0αKG)/rho(0CTL)	1.247	2.37347	0.00019	0.006674	2.047	4.13246	0	0.000529	0.8	1.7411	0.00373	0.112886	221880_s_at	P	P	P	P	P	P	P	P	P	221880_s_at	7.16167	7.36433	7.31004	8.80797	8.72403	8.0451	9.22597	9.20023	9.54952
202628_s_at	g10835158	5054	SERPINE1	serpin peptidase inhibitor, clade E (nexin, plasminogen activator inhibitor type 1), member 1	Boost: FDR p>0.05, |FC|>1.55 for rho(0αKG)/rho(0CTL)	1.247	2.37347	0.00119	0.019095	1.924	3.79474	5e-05	0.002172	0.677	1.59881	0.03238	0.303038	202628_s_at	P	P	P	P	P	P	P	P	P	202628_s_at	12.4671	11.8299	11.9151	13.6432	13.6064	12.7045	14.1487	13.8941	13.9413
1564651_at	Hs2.43818.1	221710	SMIM13	small integral membrane protein 13	Boost: FDR p>0.05, |FC|>1.55 for rho(0αKG)/rho(0CTL)	1.238	2.35871	0.00192	0.025256	2.089	4.25453	5e-05	0.002025	0.85	1.8025	0.01564	0.220536	1564651_at	P	P	P	P	P	P	P	P	P	1564651_at	6.50421	6.62079	7.07607	8.60303	7.94884	7.36387	8.95346	8.76571	8.74772
219682_s_at	g7706728	6926	TBX3	T-box 3	Boost: FDR p>0.05, |FC|>1.55 for rho(0αKG)/rho(0CTL)	1.215	2.32141	0.00525	0.046594	2.417	5.34059	5e-05	0.002045	1.202	2.30058	0.00557	0.138108	219682_s_at	P	P	P	P	P	P	P	P	P	219682_s_at	7.41618	6.40562	7.44746	8.57731	8.65058	7.68686	9.72753	9.45906	9.33482
208518_s_at	g12707560	8864	PER2	period circadian clock 2	Boost: FDR p>0.05, |FC|>1.55 for rho(0αKG)/rho(0CTL)	1.212	2.31659	0.00099	0.017148	1.989	3.96962	3e-05	0.001449	0.777	1.71356	0.01336	0.204768	208518_s_at	P	P	P	P	P	P	P	P	P	208518_s_at	7.89329	7.99875	7.45667	9.10888	9.34337	8.53341	10.0598	9.85404	9.40294
1569269_s_at	Hs2.400041.1	57522	SRGAP1	SLIT-ROBO Rho GTPase activating protein 1	Boost: FDR p>0.05, |FC|>1.55 for rho(0αKG)/rho(0CTL)	1.212	2.31659	0.00168	0.02329	2.218	4.65248	2e-05	0.001274	1.006	2.00834	0.00519	0.134199	1569269_s_at	P	P	P	P	P	P	P	P	P	1569269_s_at	7.98082	7.94678	8.10052	9.55173	9.64139	8.47224	10.1887	10.1309	10.3636
236475_at	Hs.6927.0	9645	MICAL2	microtubule associated monooxygenase, calponin and LIM domain containing 2	Boost: FDR p>0.05, |FC|>1.55 for rho(0αKG)/rho(0CTL)	1.206	2.30697	0.00284	0.032197	2.691	6.45761	1e-05	0.000791	1.484	2.79723	0.00075	0.053909	236475_at	A	A	A	P	A	P	P	P	P	236475_at	5.68332	4.79989	5.45619	7.06671	6.13345	6.358	7.81365	8.33655	7.86108
244057_s_at	Hs.132950.1	196740	VSTM4	V-set and transmembrane domain containing 4	Boost: FDR p>0.05, |FC|>1.55 for rho(0αKG)/rho(0CTL)	1.206	2.30697	0.00014	0.005576	2.181	4.53468	0	0.000289	0.975	1.96564	0.00065	0.050587	244057_s_at	A	A	A	P	P	P	P	P	P	244057_s_at	6.27839	6.91452	6.5302	7.8396	7.73676	7.76578	8.63766	8.55282	9.07688
55081_at	4876617_RC	85377	MICALL1	MICAL-like 1	Boost: FDR p>0.05, |FC|>1.55 for rho(0αKG)/rho(0CTL)	1.196	2.29104	0.0003	0.008636	1.895	3.71922	1e-05	0.000811	0.699	1.62338	0.00893	0.17127	55081_at	P	P	P	P	P	P	P	P	P	55081_at	8.98762	8.78579	9.53106	10.1231	10.5396	10.2292	10.8135	10.9609	11.2154
224822_at	Hs.8700.1	10395	DLC1	DLC1 Rho GTPase activating protein	Widen: FDR p<0.05, |FC|>1.55 for rho(0αKG)/rho(0CTL)	1.187	2.27679	4e-05	0.002563	2.399	5.27437	0	8.4e-05	1.212	2.31659	3e-05	0.014648	224822_at	P	P	P	P	P	P	P	P	P	224822_at	10.2689	10.0393	9.83781	11.2985	11.1435	11.2649	12.6266	12.5323	12.1853
230130_at	Hs.110373.1	9353	SLIT2	slit guidance ligand 2	Boost: FDR p>0.05, |FC|>1.55 for rho(0αKG)/rho(0CTL)	1.179	2.2642	0.005	0.045299	1.85	3.605	0.00026	0.005914	0.671	1.59218	0.06511	0.404466	230130_at	P	P	P	P	P	P	P	P	P	230130_at	7.69216	8.7041	8.91396	9.90601	9.79197	9.15009	10.3036	10.1007	10.4564
230349_at	Hs.41074.0	402415	XKRX	X-linked Kx blood group related, X-linked	Boost: FDR p>0.05, |FC|>1.55 for rho(0αKG)/rho(0CTL)	1.164	2.24078	0.00517	0.046186	2.288	4.88379	5e-05	0.002123	1.124	2.1795	0.00627	0.145649	230349_at	P	A	P	P	P	P	P	P	P	230349_at	5.50939	5.31799	6.6578	7.00715	7.28307	6.68634	8.11242	8.13825	8.09938
1568840_at	Hs2.398195.1	25879	DCAF13	DDB1 and CUL4 associated factor 13	Boost: FDR p>0.05, |FC|>1.55 for rho(0αKG)/rho(0CTL)	1.153	2.22376	0.00565	0.048664	1.827	3.54799	0.00029	0.006183	0.673	1.59438	0.0641	0.401564	1568840_at	P	P	P	P	P	P	P	P	P	1568840_at	4.78182	3.64289	3.95428	5.83468	5.11957	4.88443	6.08522	6.02469	5.74896
205251_at	g12707561	8864	PER2	period circadian clock 2	Boost: FDR p>0.05, |FC|>1.55 for rho(0αKG)/rho(0CTL)	1.151	2.22068	0.00323	0.034784	1.905	3.74509	0.0001	0.003293	0.753	1.68529	0.02863	0.2869	205251_at	P	P	P	P	P	P	P	P	P	205251_at	9.84943	9.53804	9.57695	11.1175	11.1624	10.1385	11.8138	11.7323	11.1325
1554473_at	Hs2.374691.1	57522	SRGAP1	SLIT-ROBO Rho GTPase activating protein 1	Widen: FDR p<0.05, |FC|>1.55 for rho(0αKG)/rho(0CTL)	1.141	2.20534	0.00289	0.03247	2.653	6.28974	1e-05	0.000671	1.512	2.85205	0.00046	0.04365	1554473_at	P	P	P	P	P	P	P	P	P	1554473_at	6.20818	6.25217	6.01134	7.84111	6.93441	7.12065	8.9864	9.17306	8.27163
234844_at	Hs.272792.2	55628	ZNF407	zinc finger protein 407	Boost: FDR p>0.05, |FC|>1.55 for rho(0αKG)/rho(0CTL)	1.135	2.19619	0.00336	0.03548	2.061	4.17275	5e-05	0.002184	0.926	1.9	0.01042	0.18336	234844_at	A	A	A	P	P	A	P	P	P	234844_at	4.53297	4.27464	4.93858	6.21762	5.85972	5.07301	6.62716	6.84545	6.45619
228188_at	Hs.5890.0	2355	FOSL2	FOS-like antigen 2	Boost: FDR p>0.05, |FC|>1.55 for rho(0αKG)/rho(0CTL)	1.127	2.18404	0.00041	0.010374	1.791	3.46055	1e-05	0.000968	0.665	1.58557	0.01065	0.184783	228188_at	P	P	P	P	P	P	P	P	P	228188_at	11.0931	10.3917	10.6608	11.6223	11.7454	12.1584	12.637	12.5415	12.3414
244822_at	Hs.164168.0	2618	GART	phosphoribosylglycinamide formyltransferase, phosphoribosylglycinamide synthetase, phosphoribosylaminoimidazole synthetase	Boost: FDR p>0.05, |FC|>1.55 for rho(0αKG)/rho(0CTL)	1.126	2.18253	0.00423	0.041064	1.832	3.5603	0.00016	0.004338	0.706	1.63127	0.04103	0.336331	244822_at	P	P	P	P	P	P	P	P	P	244822_at	7.92984	6.90291	7.60084	8.64608	8.1072	9.05737	9.41748	9.38965	9.12166
203298_s_at	g11863151	3720	JARID2	jumonji, AT rich interactive domain 2	Boost: FDR p>0.05, |FC|>1.55 for rho(0αKG)/rho(0CTL)	1.125	2.18102	3e-05	0.002175	1.85	3.605	0	0.000179	0.724	1.65176	0.00073	0.053624	203298_s_at	P	P	P	P	P	P	P	P	P	203298_s_at	9.31766	9.27749	9.50503	10.4066	10.3132	10.7568	11.1051	11.2891	11.255
225262_at	Hs.5890.1	2355	FOSL2	FOS-like antigen 2	Boost: FDR p>0.05, |FC|>1.55 for rho(0αKG)/rho(0CTL)	1.123	2.17799	0.0013	0.019832	1.957	3.88254	2e-05	0.00132	0.834	1.78262	0.00765	0.158266	225262_at	P	P	P	P	P	P	P	P	P	225262_at	7.86934	6.76778	7.41926	8.46495	8.57471	8.38428	9.47282	9.17332	9.28062
51158_at	4870849	400451	FAM174B	family with sequence similarity 174, member B	Boost: FDR p>0.05, |FC|>1.55 for rho(0αKG)/rho(0CTL)	1.103	2.14801	8e-05	0.00418	1.785	3.44618	0	0.000341	0.682	1.60436	0.00239	0.09179	51158_at	P	P	P	P	P	P	P	P	P	51158_at	8.06629	7.78154	7.65452	9.16413	9.00134	8.6467	9.57407	9.59654	9.68819
226899_at	Hs.183918.0	219699	UNC5B	unc-5 netrin receptor B	Boost: FDR p>0.05, |FC|>1.55 for rho(0αKG)/rho(0CTL)	1.088	2.12579	0.00376	0.038135	1.906	3.74769	8e-05	0.00283	0.818	1.76296	0.01713	0.23009	226899_at	A	P	P	P	P	P	P	P	P	226899_at	6.98201	8.22411	7.82229	8.84714	8.85987	8.58443	9.55733	9.39103	9.79833
215012_at	Hs.172329.1	26036	ZNF451	zinc finger protein 451	Boost: FDR p>0.05, |FC|>1.55 for rho(0αKG)/rho(0CTL)	1.082	2.11697	0.00328	0.035083	2.113	4.3259	3e-05	0.001529	1.032	2.04486	0.00433	0.122202	215012_at	P	P	P	P	P	P	P	P	P	215012_at	5.75568	5.08487	5.17342	6.46421	5.86676	6.92775	7.47445	7.58892	7.29075
205497_at	g6005969	7728	ZNF175	zinc finger protein 175	Boost: FDR p>0.05, |FC|>1.55 for rho(0αKG)/rho(0CTL)	1.081	2.1155	0.00133	0.020154	2.096	4.27522	1e-05	0.000856	1.015	2.0209	0.002	0.083566	205497_at	P	P	P	P	P	P	P	P	P	205497_at	6.28022	6.35483	6.59117	7.7699	7.81822	6.88183	8.59565	8.51058	8.40827
228442_at	Hs.112157.0	4773	NFATC2	nuclear factor of activated T-cells, cytoplasmic, calcineurin-dependent 2	Boost: FDR p>0.05, |FC|>1.55 for rho(0αKG)/rho(0CTL)	1.052	2.0734	0.00023	0.007507	1.762	3.39168	0	0.000548	0.71	1.6358	0.00322	0.106307	228442_at	A	A	A	A	A	A	A	P	A	228442_at	6.4443	6.58618	6.64231	7.72393	7.82568	7.27902	8.20418	8.59732	8.1583
1555675_at	Hs2Affx.1.429	414899	BLID	BH3-like motif containing, cell death inducer	Widen: FDR p<0.05, |FC|>1.55 for rho(0αKG)/rho(0CTL)	1.036	2.05053	0.00146	0.021405	2.519	5.73185	0	0.000336	1.483	2.79529	0.00012	0.025151	1555675_at	A	A	P	P	P	P	P	P	P	1555675_at	5.12248	5.65324	5.12955	6.52113	5.97211	6.52113	7.48214	8.10662	7.87488
203297_s_at	Hs.40154.0	3720	JARID2	jumonji, AT rich interactive domain 2	Widen (marginal): FDR p<0.05, |FC|<1.55 for rho(0αKG)/rho(0CTL)	1.021	2.02933	1e-05	0.000849	1.626	3.08656	0	8.2e-05	0.605	1.52098	0.0003	0.036113	203297_s_at	P	P	P	P	P	P	P	P	P	203297_s_at	9.70202	9.63858	9.59659	10.6198	10.6022	10.7787	11.2258	11.2638	11.3259
218881_s_at	g13375679	2355	FOSL2	FOS-like antigen 2	Boost: FDR p>0.05, |FC|>1.55 for rho(0αKG)/rho(0CTL)	1.016	2.0223	0.00155	0.022272	1.777	3.42713	3e-05	0.001477	0.761	1.69466	0.0085	0.166386	218881_s_at	P	P	P	P	P	P	P	P	P	218881_s_at	8.21219	7.42915	7.36445	8.61538	8.53994	8.89777	9.57916	9.26228	9.49504
220984_s_at	g13569931	81796	SLCO5A1	solute carrier organic anion transporter family, member 5A1	Widen: FDR p<0.05, |FC|>1.55 for rho(0αKG)/rho(0CTL)	1.01	2.01391	0.00024	0.007542	1.922	3.78948	0	0.00031	0.912	1.88165	0.00049	0.044725	220984_s_at	P	P	P	P	P	P	P	P	P	220984_s_at	5.82317	5.84556	5.92105	6.65574	6.70038	7.2641	7.86537	7.62355	7.8682
205214_at	g4758193	9262	STK17B	serine/threonine kinase 17b	Widen: FDR p<0.05, |FC|>1.55 for rho(0αKG)/rho(0CTL)	0.997	1.99585	4e-05	0.002653	2.024	4.0671	0	8.4e-05	1.027	2.03778	3e-05	0.014648	205214_at	P	P	P	P	P	P	P	P	P	205214_at	9.06652	9.11146	8.99025	10.0503	9.89706	10.211	11.1764	11.1873	10.8763
230345_at	Hs.170843.0	8482	SEMA7A	semaphorin 7A, GPI membrane anchor (John Milton Hagen blood group)	Boost: FDR p>0.05, |FC|>1.55 for rho(0αKG)/rho(0CTL)	0.992	1.98894	0.00277	0.03181	1.754	3.37292	5e-05	0.002127	0.762	1.69584	0.01208	0.196167	230345_at	P	P	P	P	P	P	P	P	P	230345_at	8.46026	8.17308	7.96314	9.21864	9.52114	8.83315	9.80107	9.65758	10.4004
226525_at	Hs.37251.0	9262	STK17B	serine/threonine kinase 17b	Widen: FDR p<0.05, |FC|>1.55 for rho(0αKG)/rho(0CTL)	0.983	1.97657	3e-05	0.002366	2.035	4.09823	0	6.9e-05	1.052	2.0734	2e-05	0.012142	226525_at	P	P	P	P	P	P	P	P	P	226525_at	9.76063	9.92967	10.124	10.9765	10.8037	10.984	11.9883	11.8891	12.0422
230229_at	Hs.118923.0	1739	DLG1	discs, large homolog 1 (Drosophila)	Widen: FDR p<0.05, |FC|>1.55 for rho(0αKG)/rho(0CTL)	0.937	1.91454	0.00443	0.042178	2.585	6.00016	0	0.000435	1.648	3.13399	0.0001	0.023225	230229_at	P	P	P	P	P	P	P	P	P	230229_at	6.98395	6.23417	6.10826	7.67427	7.17668	7.28551	8.89343	9.31231	8.87422
203850_s_at	g4757821	547	KIF1A	kinesin family member 1A	Boost: FDR p>0.05, |FC|>1.55 for rho(0αKG)/rho(0CTL)	0.936	1.91322	0.00144	0.021251	1.606	3.04407	3e-05	0.001517	0.67	1.59107	0.0102	0.182055	203850_s_at	P	P	P	P	P	P	P	P	P	203850_s_at	7.77515	7.95078	7.2109	8.69001	8.48881	8.5668	9.40051	9.40216	8.95333
225544_at	Hs.267182.0	6926	TBX3	T-box 3	Boost: FDR p>0.05, |FC|>1.55 for rho(0αKG)/rho(0CTL)	0.92	1.89212	0.00258	0.030473	1.697	3.24226	3e-05	0.001663	0.777	1.71356	0.0069	0.15168	225544_at	P	P	P	P	P	P	P	P	P	225544_at	10.7109	10.212	10.9889	11.7249	11.7624	11.1852	12.4644	12.2352	12.3045
1568836_at	Hs2.401054.1	57396	CLK4	CDC like kinase 4	Widen: FDR p<0.05, |FC|>1.55 for rho(0αKG)/rho(0CTL)	0.917	1.88818	6e-05	0.003413	1.925	3.79737	0	9.4e-05	1.008	2.01112	3e-05	0.013451	1568836_at	P	P	P	P	P	P	P	P	P	1568836_at	8.43723	8.32034	8.4633	9.42806	9.40987	9.13386	10.3425	10.4637	10.1887
204301_at	g7662259	9920	KBTBD11	kelch repeat and BTB (POZ) domain containing 11	Widen: FDR p<0.05, |FC|>1.55 for rho(0αKG)/rho(0CTL)	0.91	1.87905	4e-05	0.00256	1.738	3.33572	0	0.00011	0.828	1.77522	8e-05	0.021893	204301_at	P	P	P	P	P	P	P	P	P	204301_at	7.77322	7.70686	7.44754	8.55721	8.58418	8.51602	9.28642	9.41585	9.43913
1554640_at	Hs2.348946.2	114299	PALM2	paralemmin 2	Widen: FDR p<0.05, |FC|>1.55 for rho(0αKG)/rho(0CTL)	0.9	1.86607	0.00366	0.037495	2.616	6.13048	0	0.000296	1.716	3.28524	4e-05	0.016698	1554640_at	P	P	P	P	P	P	P	P	P	1554640_at	6.2025	6.546	5.60312	6.89245	6.96145	7.19719	8.76247	8.9279	8.50992
216066_at	Hs.211562.1	19	ABCA1	ATP binding cassette subfamily A member 1	Widen: FDR p<0.05, |FC|>1.55 for rho(0αKG)/rho(0CTL)	0.888	1.85061	0.0015	0.021726	2.266	4.80988	0	0.000286	1.377	2.59728	7e-05	0.020344	216066_at	M	A	A	P	A	P	P	P	P	216066_at	5.26534	4.94457	4.64083	5.88206	5.69598	5.93677	6.94204	7.17642	7.52878
1567224_at	Hs2.385267.1	8091	HMGA2	high mobility group AT-hook 2	Boost: FDR p>0.05, |FC|>1.55 for rho(0αKG)/rho(0CTL)	0.846	1.79751	0.00255	0.030182	1.829	3.55291	1e-05	0.000832	0.983	1.97657	0.00097	0.06115	1567224_at	P	P	P	P	P	P	P	P	P	1567224_at	8.5665	8.41068	9.04492	9.82205	9.42667	9.31105	10.2754	10.6095	10.625
1555444_a_at	Hs2.130760.5	4660	PPP1R12B	protein phosphatase 1, regulatory subunit 12B	Boost: FDR p>0.05, |FC|>1.55 for rho(0αKG)/rho(0CTL)	0.844	1.79502	0.00505	0.045557	1.526	2.87986	9e-05	0.003093	0.682	1.60436	0.01547	0.219884	1555444_a_at	A	P	P	P	P	P	P	P	P	1555444_a_at	5.49607	5.33094	4.82543	6.45895	6.07983	5.64478	6.77003	6.67984	6.7803
202150_s_at	g1490786	4739	NEDD9	neural precursor cell expressed, developmentally down-regulated 9	Widen: FDR p<0.05, |FC|>1.55 for rho(0αKG)/rho(0CTL)	0.843	1.79378	0.00409	0.040148	2.795	6.94031	0	0.00019	1.952	3.86911	1e-05	0.009969	202150_s_at	A	A	A	A	A	A	P	P	P	202150_s_at	6.37607	6.39691	6.04778	7.21689	7.07054	7.06277	9.48412	9.16101	8.55961
217503_at	Hs.314363.0	9262	STK17B	serine/threonine kinase 17b	Widen: FDR p<0.05, |FC|>1.55 for rho(0αKG)/rho(0CTL)	0.843	1.79378	0.00036	0.009518	1.672	3.18656	0	0.00033	0.83	1.77769	0.0004	0.041305	217503_at	P	P	P	P	P	P	P	P	P	217503_at	9.30651	9.25243	9.0663	10.2014	9.73292	10.2194	10.929	10.8649	10.8488
215292_s_at	Hs.134751.0	57591	MKL1	megakaryoblastic leukemia (translocation) 1	Widen: FDR p<0.05, |FC|>1.55 for rho(0αKG)/rho(0CTL)	0.829	1.77645	0.00034	0.009297	1.631	3.09728	0	0.000335	0.802	1.74352	0.00043	0.042789	215292_s_at	P	P	P	P	P	P	P	P	P	215292_s_at	7.35979	7.28616	7.42091	8.18975	8.46775	7.89521	8.98354	8.96908	9.00673
229455_at	Hs.176669.0	102723694	LOC102723694	uncharacterized LOC102723694	Boost: FDR p>0.05, |FC|>1.55 for rho(0αKG)/rho(0CTL)	0.787	1.72548	0.00444	0.042178	1.426	2.68701	8e-05	0.002764	0.639	1.55725	0.01356	0.206365	229455_at	P	P	P	P	P	P	P	P	P	229455_at	7.51404	7.40725	7.40267	8.58025	8.41866	7.6854	8.84978	8.88681	8.86485
210248_at	g5509900	7476	WNT7A	wingless-type MMTV integration site family, member 7A	Boost: FDR p>0.05, |FC|>1.55 for rho(0αKG)/rho(0CTL)	0.787	1.72548	0.00384	0.038651	1.444	2.72074	6e-05	0.002331	0.657	1.5768	0.01046	0.183579	210248_at	P	P	M	P	P	P	P	P	P	210248_at	6.89604	6.58982	6.31558	7.25604	7.13805	7.76945	8.14338	7.87819	8.11248
235368_at	Hs.81796.0	11096	ADAMTS5	ADAM metallopeptidase with thrombospondin type 1 motif 5	Widen: FDR p<0.05, |FC|>1.55 for rho(0αKG)/rho(0CTL)	0.786	1.72429	0.00435	0.041731	2.055	4.15544	0	0.000544	1.269	2.40994	0.00018	0.029205	235368_at	A	A	A	P	P	P	P	P	P	235368_at	3.99022	3.88528	4.5453	4.96735	4.84264	4.96735	5.86607	6.48903	6.2296
215757_at	Hs.287514.0	5591	PRKDC	protein kinase, DNA-activated, catalytic polypeptide	Boost: FDR p>0.05, |FC|>1.55 for rho(0αKG)/rho(0CTL)	0.777	1.71356	0.00205	0.026333	1.416	2.66845	3e-05	0.001494	0.639	1.55725	0.00653	0.147859	215757_at	P	P	P	P	P	P	P	P	P	215757_at	6.02577	6.29105	5.60386	6.91585	6.80134	6.53567	7.36593	7.44361	7.36008
227638_at	Hs.288604.0	57724	EPG5	ectopic P-granules autophagy protein 5 homolog (C. elegans)	Widen: FDR p<0.05, |FC|>1.55 for rho(0αKG)/rho(0CTL)	0.776	1.71238	0.00068	0.013784	1.833	3.56277	0	0.000243	1.057	2.0806	7e-05	0.021666	227638_at	P	P	P	P	P	P	P	P	P	227638_at	8.30215	7.92512	8.07147	8.67344	8.88338	9.07054	10.0113	10.0229	9.76395
229576_s_at	Hs.267182.1	6926	TBX3	T-box 3	Widen: FDR p<0.05, |FC|>1.55 for rho(0αKG)/rho(0CTL)	0.759	1.69232	0.00429	0.041307	1.979	3.9422	0	0.000548	1.22	2.32947	0.00018	0.029391	229576_s_at	P	P	P	P	P	P	P	P	P	229576_s_at	6.04175	5.97013	6.33539	7.03239	6.98455	6.6087	8.48208	7.8319	7.97073
203431_s_at	g7662261	9743	ARHGAP32	Rho GTPase activating protein 32	Boost: FDR p>0.05, |FC|>1.55 for rho(0αKG)/rho(0CTL)	0.757	1.68997	0.00297	0.032992	1.449	2.73019	3e-05	0.001563	0.692	1.61552	0.00505	0.132579	203431_s_at	P	P	P	P	P	P	P	P	P	203431_s_at	7.70836	7.9758	8.3601	8.66444	8.59311	9.05791	9.38584	9.53793	9.4668
239624_at	Hs.120456.0	102724689	LOC102724689	uncharacterized LOC102724689	Boost: FDR p>0.05, |FC|>1.55 for rho(0αKG)/rho(0CTL)	0.752	1.68413	0.0011	0.018193	1.537	2.9019	0	0.000608	0.785	1.72309	0.00082	0.056679	239624_at	P	P	P	P	P	P	P	P	P	239624_at	6.32608	6.83736	6.84092	7.44588	7.45292	7.36098	8.08397	8.35663	8.17414
200606_at	g4758199	1832	DSP	desmoplakin	Boost: FDR p>0.05, |FC|>1.55 for rho(0αKG)/rho(0CTL)	0.745	1.67597	0.00038	0.00981	1.434	2.70195	0	0.000388	0.689	1.61217	0.00065	0.050587	200606_at	P	P	P	P	P	P	P	P	P	200606_at	10.1523	9.95383	10.4154	10.948	10.9377	10.8703	11.6191	11.6801	11.5242
225880_at	Hs.24359.0	163590	TOR1AIP2	torsin A interacting protein 2	Boost: FDR p>0.05, |FC|>1.55 for rho(0αKG)/rho(0CTL)	0.73	1.65864	0.00544	0.047669	1.495	2.81864	4e-05	0.001847	0.764	1.69819	0.00419	0.12011	225880_at	P	P	P	P	P	P	P	P	P	225880_at	9.71263	9.73537	10.0329	10.7463	10.8369	10.0888	11.2239	11.3058	11.435
241812_at	Hs.199438.0	26010	SPATS2L	spermatogenesis associated, serine-rich 2-like	Boost: FDR p>0.05, |FC|>1.55 for rho(0αKG)/rho(0CTL)	0.726	1.65405	0.00341	0.035795	1.533	2.89387	2e-05	0.001152	0.806	1.74836	0.00179	0.080218	241812_at	P	P	P	P	P	P	P	P	P	241812_at	8.40265	7.93772	7.95866	8.99112	8.77542	8.71146	9.70959	9.8626	9.32511
1563458_at	Hs2.376972.1	55742	PARVA	parvin, alpha	Boost: FDR p>0.05, |FC|>1.55 for rho(0αKG)/rho(0CTL)	0.722	1.64947	0.0036	0.037039	1.493	2.81474	2e-05	0.001282	0.77	1.70527	0.00244	0.092815	1563458_at	A	A	A	P	P	A	P	P	P	1563458_at	4.73612	4.24673	4.41862	5.26081	5.42801	4.88005	5.9664	6.12519	5.78873
226991_at	Hs.102248.0	4773	NFATC2	nuclear factor of activated T-cells, cytoplasmic, calcineurin-dependent 2	Widen: FDR p<0.05, |FC|>1.55 for rho(0αKG)/rho(0CTL)	0.701	1.62563	0.0026	0.030613	2.054	4.15256	0	0.000234	1.353	2.55443	2e-05	0.013234	226991_at	P	P	P	P	P	P	P	P	P	226991_at	6.49138	6.81268	6.73985	7.52993	7.05088	7.56722	8.68448	8.90348	8.61802
1559902_at	Hs2.433153.2	57591	MKL1	megakaryoblastic leukemia (translocation) 1	Boost: FDR p>0.05, |FC|>1.55 for rho(0αKG)/rho(0CTL)	0.693	1.61664	0.00127	0.019666	1.379	2.60088	1e-05	0.000736	0.686	1.60882	0.00135	0.070433	1559902_at	P	P	A	P	P	P	P	P	P	1559902_at	6.74062	6.8914	6.74017	7.71175	7.26028	7.47909	8.372	8.03448	8.10406
212748_at	Hs.31146.0	57591	MKL1	megakaryoblastic leukemia (translocation) 1	Boost: FDR p>0.05, |FC|>1.55 for rho(0αKG)/rho(0CTL)	0.671	1.59218	0.00428	0.041269	1.378	2.59908	3e-05	0.001499	0.707	1.63241	0.00315	0.1049	212748_at	P	P	P	P	P	P	P	P	P	212748_at	7.1764	6.87273	6.89474	7.65243	7.92859	7.37644	8.51251	8.44705	8.11878
227034_at	Hs.28917.0	65124	SOWAHC	sosondowah ankyrin repeat domain family member C	Widen: FDR p<0.05, |FC|>1.55 for rho(0αKG)/rho(0CTL)	0.664	1.58447	0.00053	0.011892	1.325	2.50533	0	0.000413	0.662	1.58227	0.00055	0.046875	227034_at	P	P	P	P	P	P	P	P	P	227034_at	10.088	10.206	10.0909	10.6436	10.9032	10.8293	11.5467	11.5397	11.2744
222917_s_at	Hs.332150.0	6926	TBX3	T-box 3	Boost: FDR p>0.05, |FC|>1.55 for rho(0αKG)/rho(0CTL)	0.656	1.57571	0.0058	0.049422	1.569	2.96699	1e-05	0.000987	0.913	1.88296	0.00074	0.053909	222917_s_at	P	P	P	P	P	P	P	P	P	222917_s_at	6.17966	5.94503	5.69098	6.71116	6.73116	6.34245	7.54571	7.721	7.25605
213909_at	Hs.288467.0	131578	LRRC15	leucine rich repeat containing 15	Widen: FDR p<0.05, |FC|>1.55 for rho(0αKG)/rho(0CTL)	0.651	1.57026	0.0039	0.039004	1.733	3.32418	0	0.000449	1.082	2.11697	0.00013	0.025923	213909_at	A	A	A	P	P	M	P	P	P	213909_at	5.93556	5.90846	6.07299	6.94887	6.6342	6.28612	7.83037	7.67832	7.60751
218032_at	g3978241	8303	SNN	stannin	Boost: FDR p>0.05, |FC|>1.55 for rho(0αKG)/rho(0CTL)	-0.658	-1.57789	0.00387	0.038833	-1.442	-2.71697	1e-05	0.001071	-0.784	-1.7219	0.00129	0.068915	218032_at	P	P	P	P	P	P	P	P	M	218032_at	7.55015	7.82942	8.22253	7.32314	7.07644	7.2296	6.34701	6.46638	6.46229
243413_at	Hs.224517.0	150737	TTC30B	tetratricopeptide repeat domain 30B	Widen: FDR p<0.05, |FC|>1.55 for rho(0αKG)/rho(0CTL)	-0.658	-1.57789	0.00391	0.039022	-1.9	-3.73213	0	0.000314	-1.243	-2.3669	5e-05	0.017661	243413_at	P	P	P	P	P	P	P	P	P	243413_at	7.34378	6.96904	7.25314	6.79476	6.50694	6.29105	5.1266	5.48389	5.25458
229073_at	Hs.116750.0	283659	PRTG	protogenin	Widen: FDR p<0.05, |FC|>1.55 for rho(0αKG)/rho(0CTL)	-0.663	-1.58337	0.00073	0.014354	-1.444	-2.72074	0	0.000343	-0.781	-1.71832	0.00023	0.031728	229073_at	P	P	P	P	P	P	P	P	P	229073_at	9.88855	9.50283	9.83622	9.08388	9.0612	9.09235	8.24476	8.22211	8.42753
211565_at	g2921415	6457	SH3GL3	SH3-domain GRB2-like 3	Boost: FDR p>0.05, |FC|>1.55 for rho(0αKG)/rho(0CTL)	-0.667	-1.58777	0.00377	0.038202	-1.342	-2.53503	3e-05	0.001494	-0.675	-1.5966	0.00352	0.110613	211565_at	P	P	P	P	P	P	P	P	A	211565_at	5.78298	5.30342	5.85291	4.89006	5.08119	4.96721	4.27238	4.51728	4.12458
227442_at	Hs.94560.0	285521	COX18	COX18 cytochrome c oxidase assembly factor	Boost: FDR p>0.05, |FC|>1.55 for rho(0αKG)/rho(0CTL)	-0.669	-1.58997	0.00342	0.03589	-1.321	-2.49839	3e-05	0.001507	-0.652	-1.57135	0.00398	0.116825	227442_at	P	P	P	P	P	P	P	P	P	227442_at	8.86166	9.28443	8.83917	8.3011	8.15327	8.52431	7.57025	7.88999	7.56246
228174_at	Hs.48610.0	286205	SCAI	suppressor of cancer cell invasion	Widen: FDR p<0.05, |FC|>1.55 for rho(0αKG)/rho(0CTL)	-0.701	-1.62563	0.00394	0.039256	-1.65	-3.13834	1e-05	0.000792	-0.949	-1.93053	0.00056	0.047488	228174_at	P	P	P	P	P	P	P	P	P	228174_at	8.192	8.28063	8.11113	7.47001	7.49205	7.5197	6.9037	6.60531	6.12535
216973_s_at	Hs.819.1	3217	HOXB7	homeobox B7	Widen: FDR p<0.05, |FC|>1.55 for rho(0αKG)/rho(0CTL)	-0.705	-1.63014	0.00367	0.037561	-1.954	-3.87447	0	0.000365	-1.249	-2.37677	7e-05	0.021666	216973_s_at	P	P	P	P	P	P	P	P	P	216973_s_at	9.38508	9.07816	9.69489	8.48651	8.61909	8.93704	7.5385	7.33164	7.42461
1553718_at	Hs2.374782.1	147694	ZNF548	zinc finger protein 548	Boost: FDR p>0.05, |FC|>1.55 for rho(0αKG)/rho(0CTL)	-0.711	-1.63694	0.00366	0.037495	-1.54	-2.90795	1e-05	0.001087	-0.828	-1.77522	0.00142	0.07163	1553718_at	P	P	P	P	P	P	P	P	P	1553718_at	9.24912	9.18081	9.70416	8.81399	8.54291	8.64375	7.97444	7.99252	7.54823
235490_at	Hs.205466.0	84314	TMEM107	transmembrane protein 107	Boost: FDR p>0.05, |FC|>1.55 for rho(0αKG)/rho(0CTL)	-0.73	-1.65864	0.00377	0.038202	-1.684	-3.21318	1e-05	0.000833	-0.954	-1.93724	0.00069	0.051909	235490_at	P	P	P	P	P	P	P	P	P	235490_at	9.69712	10.217	10.1933	9.1818	9.32207	9.41262	8.32701	8.08612	8.64277
243452_at	Hs.121245.0	646778	LOC646778	uncharacterized LOC646778	Boost: FDR p>0.05, |FC|>1.55 for rho(0αKG)/rho(0CTL)	-0.763	-1.69702	0.00321	0.034625	-1.45	-2.73208	3e-05	0.001699	-0.687	-1.60993	0.00588	0.140822	243452_at	P	P	P	P	P	P	A	A	A	243452_at	5.3991	5.66936	5.7296	4.91288	5.07708	4.52011	4.41382	4.15969	3.87528
227379_at	Hs.241101.0	154141	MBOAT1	membrane bound O-acyltransferase domain containing 1	Boost: FDR p>0.05, |FC|>1.55 for rho(0αKG)/rho(0CTL)	-0.764	-1.69819	0.0037	0.037714	-1.428	-2.69073	5e-05	0.002065	-0.664	-1.58447	0.00818	0.163793	227379_at	P	P	P	P	P	P	P	P	P	227379_at	10.7868	10.014	10.0693	9.5152	9.55144	9.51078	8.92403	8.92755	8.73446
211518_s_at	g576934	652	BMP4	bone morphogenetic protein 4	Widen: FDR p<0.05, |FC|>1.55 for rho(0αKG)/rho(0CTL)	-0.765	-1.69937	0.00012	0.005169	-1.49	-2.80889	0	0.000197	-0.725	-1.6529	0.00018	0.029205	211518_s_at	P	P	P	A	A	A	A	A	A	211518_s_at	7.4151	7.49537	7.28092	6.63215	6.63215	6.63215	6.00279	5.73577	5.98145
233354_at	Hs.43145.0	79088	ZNF426	zinc finger protein 426	Widen: FDR p<0.05, |FC|>1.55 for rho(0αKG)/rho(0CTL)	-0.768	-1.70291	0.00195	0.0255	-1.711	-3.27388	1e-05	0.000611	-0.943	-1.92252	0.00049	0.044792	233354_at	P	P	P	P	P	P	P	P	P	233354_at	7.71634	7.47924	7.37644	6.58951	6.71472	6.96483	6.02518	5.93201	5.48194
202704_at	Hs.178137.0	10140	TOB1	transducer of ERBB2, 1	Boost: FDR p>0.05, |FC|>1.55 for rho(0αKG)/rho(0CTL)	-0.792	-1.73147	0.00387	0.038848	-1.801	-3.48462	1e-05	0.000912	-1.009	-2.01252	0.00083	0.057037	202704_at	P	P	P	P	P	P	P	P	P	202704_at	10.2686	10.2859	10.3272	9.16325	9.44581	9.89814	8.4459	8.80286	8.23071
236170_x_at	Hs.134071.0	101930085	LOC101930085	uncharacterized LOC101930085	Widen: FDR p<0.05, |FC|>1.55 for rho(0αKG)/rho(0CTL)	-0.805	-1.74715	0.00249	0.029654	-1.961	-3.89332	0	0.000494	-1.156	-2.22839	0.00022	0.03123	236170_x_at	P	P	P	P	P	P	P	P	P	236170_x_at	8.32677	8.5521	8.35056	7.42829	7.44931	7.93567	6.78117	6.38743	6.17725
228381_at	Hs.97179.0	80063	ATF7IP2	activating transcription factor 7 interacting protein 2	Widen: FDR p<0.05, |FC|>1.55 for rho(0αKG)/rho(0CTL)	-0.83	-1.77769	0.00315	0.034222	-2.233	-4.70111	0	0.000373	-1.403	-2.64451	8e-05	0.02262	228381_at	P	P	P	P	P	P	P	M	A	228381_at	8.22683	8.26428	7.54006	7.12208	7.07142	7.34816	5.5474	5.93099	5.85374
228652_at	Hs.109540.0	284309	ZNF776	zinc finger protein 776	Boost: FDR p>0.05, |FC|>1.55 for rho(0αKG)/rho(0CTL)	-0.884	-1.84548	0.00405	0.039876	-1.853	-3.61251	2e-05	0.00132	-0.969	-1.95748	0.00234	0.090954	228652_at	P	P	P	P	P	P	P	P	A	228652_at	6.36542	6.90284	6.92402	5.6338	5.98243	5.92263	4.89251	5.27311	4.46689
224365_s_at	g13625161	91151	TIGD7	tigger transposable element derived 7	Boost: FDR p>0.05, |FC|>1.55 for rho(0αKG)/rho(0CTL)	-0.9	-1.86607	0.00526	0.046669	-1.55	-2.92817	0.00014	0.003993	-0.65	-1.56917	0.02674	0.277636	224365_s_at	P	P	P	P	P	P	P	P	P	224365_s_at	8.98891	8.52614	8.33263	7.61512	7.30067	8.23257	7.12235	7.10472	6.97016
1554588_a_at	Hs2.224517.2	150737	TTC30B	tetratricopeptide repeat domain 30B	Widen: FDR p<0.05, |FC|>1.55 for rho(0αKG)/rho(0CTL)	-0.91	-1.87905	0.00511	0.045896	-2.592	-6.02934	0	0.000413	-1.683	-3.21095	8e-05	0.021989	1554588_a_at	P	P	P	P	P	P	P	A	A	1554588_a_at	6.55193	6.3134	6.5307	5.65112	5.81004	5.20598	3.60984	3.57694	4.43201
1553789_a_at	Hs2.236572.1	54058	C21orf58	chromosome 21 open reading frame 58	Boost: FDR p>0.05, |FC|>1.55 for rho(0αKG)/rho(0CTL)	-0.935	-1.91189	0.00068	0.013693	-1.859	-3.62756	0	0.000496	-0.924	-1.89737	0.00073	0.053851	1553789_a_at	P	P	P	P	P	P	M	A	A	1553789_a_at	7.61191	7.69173	7.90937	6.48718	6.85706	7.06337	6.14914	5.68238	5.80428
221185_s_at	g13376682	84223	IQCG	IQ motif containing G	Boost: FDR p>0.05, |FC|>1.55 for rho(0αKG)/rho(0CTL)	-0.938	-1.91587	0.00083	0.015382	-1.595	-3.02095	2e-05	0.001129	-0.657	-1.5768	0.0073	0.155327	221185_s_at	P	P	P	P	P	P	P	P	P	221185_s_at	8.47052	8.86085	8.37275	7.74659	7.51624	7.62793	7.00621	7.27584	6.63634
212118_at	Hs.142653.1	5987	TRIM27	tripartite motif containing 27	Widen: FDR p<0.05, |FC|>1.55 for rho(0αKG)/rho(0CTL)	-0.938	-1.91587	3e-05	0.002486	-1.596	-3.02304	0	0.000176	-0.658	-1.57789	0.00049	0.044626	212118_at	P	P	P	P	P	P	P	P	P	212118_at	10.0017	9.87311	10.0519	9.1966	8.9535	8.96258	8.38891	8.49524	8.2535
238992_at	Hs.128076.0	11201	POLI	polymerase (DNA directed) iota	Boost: FDR p>0.05, |FC|>1.55 for rho(0αKG)/rho(0CTL)	-0.944	-1.92385	0.00375	0.038073	-2.007	-4.01946	2e-05	0.001185	-1.063	-2.08927	0.00181	0.080496	238992_at	P	P	P	P	P	P	P	P	P	238992_at	8.86065	8.99248	9.4394	7.71795	8.14394	8.59862	7.11847	7.30046	6.85206
229285_at	Hs.56156.0	6041	RNASEL	ribonuclease L (2',5'-oligoisoadenylate synthetase-dependent)	Widen: FDR p<0.05, |FC|>1.55 for rho(0αKG)/rho(0CTL)	-0.947	-1.92786	0.00163	0.022935	-2.462	-5.5098	0	0.000279	-1.515	-2.85799	6e-05	0.019134	229285_at	P	P	P	P	P	P	P	P	P	229285_at	7.46572	8.23589	7.66552	6.77367	6.9185	6.83418	5.28694	5.62669	5.06713
220936_s_at	g8922757	55766	H2AFJ	H2A histone family, member J	Widen: FDR p<0.05, |FC|>1.55 for rho(0αKG)/rho(0CTL)	-0.954	-1.93724	0.00035	0.009429	-2.697	-6.48452	0	7.1e-05	-1.743	-3.3473	0	0.005172	220936_s_at	P	P	P	P	P	P	P	P	P	220936_s_at	8.8421	8.77819	8.94184	7.75107	7.74857	8.2009	6.02961	6.44315	5.99861
219372_at	g7661539	28981	IFT81	intraflagellar transport 81	Boost: FDR p>0.05, |FC|>1.55 for rho(0αKG)/rho(0CTL)	-0.958	-1.94261	0.00575	0.049155	-1.612	-3.05675	0.00019	0.004777	-0.654	-1.57352	0.03634	0.319536	219372_at	P	P	P	P	P	P	P	P	P	219372_at	9.6722	9.59406	9.55494	8.22255	8.59783	9.12573	8.32838	8.17724	7.47916
218361_at	g8922588	55204	GOLPH3L	golgi phosphoprotein 3-like	Boost: FDR p>0.05, |FC|>1.55 for rho(0αKG)/rho(0CTL)	-0.963	-1.94936	0.00399	0.039501	-1.663	-3.16674	0.0001	0.003192	-0.7	-1.6245	0.02115	0.2515	218361_at	P	P	P	P	P	P	P	P	P	218361_at	11.4678	11.5198	11.5801	10.1334	10.3643	11.18	10.116	9.817	9.64575
231919_at	Hs.257043.0	1629	DBT	dihydrolipoamide branched chain transacylase E2	Boost: FDR p>0.05, |FC|>1.55 for rho(0αKG)/rho(0CTL)	-0.968	-1.95613	0.00358	0.036918	-2.059	-4.16697	2e-05	0.001152	-1.092	-2.13169	0.0017	0.077701	231919_at	P	P	P	P	P	P	P	P	P	231919_at	6.77218	7.37549	7.23036	5.81373	6.02776	6.63356	4.78164	5.11172	5.30705
228781_at	Hs.62314.0	79991	OBFC1	oligonucleotide/oligosaccharide-binding fold containing 1	Boost: FDR p>0.05, |FC|>1.55 for rho(0αKG)/rho(0CTL)	-0.977	-1.96837	0.00486	0.044543	-1.675	-3.19319	0.00013	0.003832	-0.698	-1.62225	0.02656	0.276836	228781_at	P	P	P	P	P	P	P	P	A	228781_at	6.50382	7.33122	7.10241	5.84929	5.73804	6.4183	5.2661	5.62059	5.02632
207156_at	g10800131	8969	HIST1H2AG	histone cluster 1, H2ag	Boost: FDR p>0.05, |FC|>1.55 for rho(0αKG)/rho(0CTL)	-0.978	-1.96973	0.00471	0.043796	-2.132	-4.38325	2e-05	0.001244	-1.154	-2.2253	0.00172	0.077939	207156_at	P	P	P	P	P	P	P	P	P	207156_at	9.28455	9.40001	9.71258	8.25498	8.21687	8.99265	7.05495	7.15501	7.79251
220770_s_at	g11545804	63920	ZBED8	zinc finger, BED-type containing 8	Boost: FDR p>0.05, |FC|>1.55 for rho(0αKG)/rho(0CTL)	-0.981	-1.97383	0.00088	0.01586	-2	-4	0	0.000529	-1.02	-2.02792	0.00068	0.051492	220770_s_at	P	P	P	P	P	P	P	P	P	220770_s_at	8.5777	9.39058	9.12879	8.06715	7.96222	8.12515	6.95266	6.90731	7.23567
205365_at	Hs.98428.0	3216	HOXB6	homeobox B6	Boost: FDR p>0.05, |FC|>1.55 for rho(0αKG)/rho(0CTL)	-0.983	-1.97657	0.00257	0.030405	-1.763	-3.39403	4e-05	0.001886	-0.78	-1.71713	0.00957	0.176861	205365_at	P	P	P	P	P	P	P	P	P	205365_at	9.74572	9.21478	9.01442	8.30798	8.17824	8.5402	7.1515	7.6368	7.89706
227288_at	Hs.69504.0	285672	SREK1IP1	SREK1-interacting protein 1	Boost: FDR p>0.05, |FC|>1.55 for rho(0αKG)/rho(0CTL)	-0.983	-1.97657	0.00067	0.013608	-1.725	-3.3058	1e-05	0.000839	-0.742	-1.67249	0.00399	0.116935	227288_at	P	P	P	P	P	P	A	M	A	227288_at	8.70114	9.08294	9.39485	7.8153	8.33212	8.0837	7.33462	7.38861	7.28069
205601_s_at	g4504468	3215	HOXB5	homeobox B5	Boost: FDR p>0.05, |FC|>1.55 for rho(0αKG)/rho(0CTL)	-1.002	-2.00277	0.00159	0.022583	-1.835	-3.56771	2e-05	0.001228	-0.833	-1.78139	0.00487	0.129488	205601_s_at	P	P	P	P	P	P	P	P	P	205601_s_at	10.2835	9.50685	9.86811	8.94566	8.73731	8.96954	8.10896	7.69256	8.3509
235742_at	Hs.153699.0	389	RHOC	ras homolog family member C	Boost: FDR p>0.05, |FC|>1.55 for rho(0αKG)/rho(0CTL)	-1.017	-2.02371	0.00075	0.014514	-1.831	-3.55784	1e-05	0.000811	-0.814	-1.75808	0.00313	0.104636	235742_at	P	P	P	P	P	P	P	P	P	235742_at	8.22667	8.23422	8.84818	7.56477	7.28573	7.40725	6.44345	6.9119	6.46116
232124_at	Hs.112822.0	729085	FAM198A	family with sequence similarity 198, member A	Boost: FDR p>0.05, |FC|>1.55 for rho(0αKG)/rho(0CTL)	-1.023	-2.03214	0.00404	0.039826	-1.821	-3.53326	8e-05	0.002781	-0.799	-1.73989	0.0152	0.217768	232124_at	P	P	P	P	P	P	P	A	P	232124_at	7.89539	6.96409	6.6992	6.02478	6.23532	6.23049	5.34289	5.46863	5.28281
226402_at	Hs.109087.0	113612	CYP2U1	cytochrome P450, family 2, subfamily U, polypeptide 1	Boost: FDR p>0.05, |FC|>1.55 for rho(0αKG)/rho(0CTL)	-1.027	-2.03778	0.00183	0.024599	-1.784	-3.4438	3e-05	0.00169	-0.757	-1.68997	0.01054	0.18395	226402_at	P	P	P	P	P	P	P	P	P	226402_at	8.02897	8.49348	8.9313	7.58239	7.52943	7.26221	6.97985	6.70106	6.42106
227462_at	Hs.23054.0	64167	ERAP2	endoplasmic reticulum aminopeptidase 2	Boost: FDR p>0.05, |FC|>1.55 for rho(0αKG)/rho(0CTL)	-1.033	-2.04627	0.00126	0.019605	-2.153	-4.44752	0	0.000609	-1.12	-2.17347	0.00073	0.053844	227462_at	P	P	P	P	P	P	P	P	M	227462_at	6.43166	6.40147	6.56585	5.10297	5.52417	5.67222	4.32826	4.72921	3.88183
237105_at	Hs.130595.0	101927027	LOC101927027	uncharacterized LOC101927027	Boost: FDR p>0.05, |FC|>1.55 for rho(0αKG)/rho(0CTL)	-1.035	-2.04911	0.00181	0.024475	-2.016	-4.04461	1e-05	0.001046	-0.981	-1.97383	0.00254	0.094294	237105_at	P	P	P	P	P	P	P	P	P	237105_at	8.51602	8.49018	9.19698	7.52466	7.80276	7.77002	6.80289	7.03326	6.31927
226743_at	Hs.235709.0	91607	SLFN11	schlafen family member 11	Boost: FDR p>0.05, |FC|>1.55 for rho(0αKG)/rho(0CTL)	-1.058	-2.08204	0.0015	0.021776	-2.111	-4.31991	1e-05	0.000818	-1.053	-2.07484	0.00155	0.07451	226743_at	P	P	P	P	P	P	P	P	P	226743_at	10.4662	10.2904	10.3175	9.0189	9.33478	9.54642	8.69443	8.3091	7.73826
228213_at	Hs.36727.2	55766	H2AFJ	H2A histone family, member J	Boost: FDR p>0.05, |FC|>1.55 for rho(0αKG)/rho(0CTL)	-1.065	-2.09217	0.00487	0.044611	-2.069	-4.19596	5e-05	0.002146	-1.004	-2.00555	0.00682	0.15083	228213_at	P	P	P	P	P	P	P	P	P	228213_at	7.39838	6.95643	7.32824	5.74334	6.49814	6.24522	4.54879	5.36086	5.56648
234491_s_at	Hs.288906.1	60485	SAV1	salvador family WW domain containing protein 1	Boost: FDR p>0.05, |FC|>1.55 for rho(0αKG)/rho(0CTL)	-1.077	-2.10964	1e-05	0.001409	-1.719	-3.29208	0	0.000138	-0.642	-1.56049	0.00065	0.050587	234491_s_at	P	P	P	P	P	P	P	P	P	234491_s_at	10.3941	10.6154	10.4261	9.22901	9.48084	9.4934	8.84993	8.66256	8.76514
223665_at	g13383264	84517	ACTRT3	actin-related protein T3	Boost: FDR p>0.05, |FC|>1.55 for rho(0αKG)/rho(0CTL)	-1.082	-2.11697	0.00173	0.02372	-1.783	-3.44141	5e-05	0.002082	-0.701	-1.62563	0.01905	0.240685	223665_at	P	P	P	P	P	A	A	A	A	223665_at	5.93752	5.68072	6.39753	4.98949	5.25623	4.5252	4.4816	3.93186	4.25422
1554520_at	Hs2.192155.1	283861	LOC283861	uncharacterized LOC283861	Widen: FDR p<0.05, |FC|>1.55 for rho(0αKG)/rho(0CTL)	-1.093	-2.13317	0.0015	0.021776	-2.337	-5.05251	1e-05	0.000612	-1.245	-2.37019	0.00063	0.049958	1554520_at	P	P	P	P	P	P	P	P	P	1554520_at	8.50185	9.53953	9.14105	7.84468	7.96304	8.09708	6.49859	6.74899	6.92341
223611_s_at	Hs.66295.1	84708	LNX1	ligand of numb-protein X 1, E3 ubiquitin protein ligase	Boost: FDR p>0.05, |FC|>1.55 for rho(0αKG)/rho(0CTL)	-1.148	-2.21606	0.00308	0.033756	-1.831	-3.55784	0.00013	0.003757	-0.683	-1.60547	0.04087	0.335599	223611_s_at	P	P	P	P	P	P	P	P	P	223611_s_at	9.17755	8.91351	9.3529	7.83261	8.15968	8.00872	6.98917	8.05873	6.90433
235359_at	Hs.162185.0	375387	NRROS	negative regulator of reactive oxygen species	Boost: FDR p>0.05, |FC|>1.55 for rho(0αKG)/rho(0CTL)	-1.159	-2.23303	0.00202	0.026133	-2.07	-4.19887	3e-05	0.001615	-0.911	-1.88035	0.00824	0.16446	235359_at	P	P	P	P	P	A	A	A	A	235359_at	7.93399	8.21594	8.43523	7.14151	7.49832	6.46722	5.85758	6.45413	6.06245
209911_x_at	g12803984	3017	HIST1H2BD	histone cluster 1, H2bd	Boost: FDR p>0.05, |FC|>1.55 for rho(0αKG)/rho(0CTL)	-1.187	-2.27679	0.00159	0.022595	-2.21	-4.62675	2e-05	0.001162	-1.023	-2.03214	0.00397	0.116692	209911_x_at	P	P	P	P	P	P	P	P	P	209911_x_at	10.6515	10.9986	11.1967	9.37642	9.51045	10.3984	8.55699	8.75321	8.90654
230782_at	Hs.293672.0	6652	SORD	sorbitol dehydrogenase	Boost: FDR p>0.05, |FC|>1.55 for rho(0αKG)/rho(0CTL)	-1.191	-2.28311	0.0002	0.006767	-1.98	-3.94493	0	0.00051	-0.789	-1.72788	0.00313	0.104636	230782_at	P	P	P	P	P	P	P	P	A	230782_at	7.57453	7.50461	7.35656	6.37067	5.84856	6.64342	5.59049	5.5893	5.31446
232000_at	Hs.48919.0	158219	TTC39B	tetratricopeptide repeat domain 39B	Boost: FDR p>0.05, |FC|>1.55 for rho(0αKG)/rho(0CTL)	-1.207	-2.30857	0.0045	0.042574	-1.894	-3.71664	0.00023	0.005429	-0.686	-1.60882	0.0613	0.394132	232000_at	P	P	P	P	P	P	P	P	P	232000_at	7.44269	7.541	7.27904	5.97816	5.61748	7.04528	5.28683	5.78769	5.50765
1556236_at	Hs2.208685.1	346157	ZNF391	zinc finger protein 391	Boost: FDR p>0.05, |FC|>1.55 for rho(0αKG)/rho(0CTL)	-1.219	-2.32785	0.00484	0.044423	-1.957	-3.88254	0.00021	0.005188	-0.738	-1.66786	0.05128	0.367241	1556236_at	P	P	P	A	A	P	A	A	A	1556236_at	6.37225	6.53237	5.70147	4.40105	4.95217	5.59474	3.97739	4.62084	4.13625
1561948_at	Hs2.127747.1	80219	COQ10B	coenzyme Q10B	Boost: FDR p>0.05, |FC|>1.55 for rho(0αKG)/rho(0CTL)	-1.22	-2.32947	0.00554	0.048113	-2.133	-4.38629	0.00014	0.003897	-0.913	-1.88296	0.02388	0.265142	1561948_at	P	P	P	P	M	P	A	A	A	1561948_at	7.79406	7.76494	6.35314	6.15377	5.9391	6.15916	5.18624	5.08849	5.23788
219156_at	g8922963	55333	SYNJ2BP	synaptojanin 2 binding protein	Boost: FDR p>0.05, |FC|>1.55 for rho(0αKG)/rho(0CTL)	-1.221	-2.33108	1e-05	0.001495	-1.857	-3.62254	0	0.000176	-0.635	-1.55294	0.00174	0.078551	219156_at	P	P	P	P	P	P	P	P	P	219156_at	8.65396	9.08	9.04176	7.58599	7.67175	7.8543	7.05495	7.14506	7.00591
205160_at	Hs.31034.0	8800	PEX11A	peroxisomal biogenesis factor 11 alpha	Boost: FDR p>0.05, |FC|>1.55 for rho(0αKG)/rho(0CTL)	-1.235	-2.35381	0.0017	0.023476	-1.99	-3.97237	6e-05	0.0023	-0.755	-1.68763	0.02452	0.267657	205160_at	P	P	P	P	P	P	P	P	P	205160_at	8.36234	9.3272	8.35033	7.21444	7.35449	7.76578	6.85308	6.83029	6.38545
212928_at	Hs.284141.0	23270	TSPYL4	TSPY-like 4	Boost: FDR p>0.05, |FC|>1.55 for rho(0αKG)/rho(0CTL)	-1.243	-2.3669	0.00035	0.009391	-2.303	-4.93483	0	0.000444	-1.06	-2.08493	0.00105	0.063293	212928_at	P	P	P	P	P	P	P	P	P	212928_at	10.1497	9.79832	9.95973	8.49795	8.61058	9.06985	7.67787	8.04807	7.27206
220235_s_at	g8922961	55791	LRIF1	ligand dependent nuclear receptor interacting factor 1	Boost: FDR p>0.05, |FC|>1.55 for rho(0αKG)/rho(0CTL)	-1.249	-2.37677	0.00013	0.005337	-2.078	-4.22221	0	0.000388	-0.828	-1.77522	0.0022	0.087915	220235_s_at	P	P	P	P	P	P	P	P	P	220235_s_at	8.77635	9.01827	8.70496	7.33876	7.73175	7.68161	7.00715	6.90519	6.35448
227385_at	Hs.29669.0	403313	PLPP6	phospholipid phosphatase 6	Widen: FDR p<0.05, |FC|>1.55 for rho(0αKG)/rho(0CTL)	-1.266	-2.40494	8e-05	0.004042	-2.809	-7.00799	0	8.4e-05	-1.543	-2.914	2e-05	0.011079	227385_at	P	P	P	P	P	P	P	P	P	227385_at	11.6858	12.1607	11.6465	10.5446	10.6523	10.4967	8.81995	8.89466	9.35035
200885_at	g4885066	389	RHOC	ras homolog family member C	Boost: FDR p>0.05, |FC|>1.55 for rho(0αKG)/rho(0CTL)	-1.285	-2.43682	0.00301	0.033302	-2.003	-4.00833	0.00015	0.004063	-0.718	-1.6449	0.05104	0.366736	200885_at	P	P	P	P	P	P	P	P	P	200885_at	11.2528	10.6484	10.015	8.96354	9.20169	9.89619	8.55996	8.71757	8.6287
204774_at	g7657074	2123	EVI2A	ecotropic viral integration site 2A	Boost: FDR p>0.05, |FC|>1.55 for rho(0αKG)/rho(0CTL)	-1.289	-2.44359	0.00578	0.049346	-2.172	-4.50648	0.00019	0.004754	-0.883	-1.84421	0.03586	0.317405	204774_at	P	P	P	P	P	P	P	P	P	204774_at	8.82137	7.69529	9.03254	7.69946	7.30943	6.67429	6.43836	6.20051	6.39578
244008_at	Hs.32468.0	79668	PARP8	poly(ADP-ribose) polymerase family member 8	Boost: FDR p>0.05, |FC|>1.55 for rho(0αKG)/rho(0CTL)	-1.3	-2.46229	0.00087	0.015839	-2.036	-4.10107	3e-05	0.001628	-0.736	-1.66555	0.02189	0.254685	244008_at	P	P	P	P	P	P	P	P	P	244008_at	7.27763	7.20287	8.00817	5.81955	6.51785	6.25253	5.42423	5.78126	5.17514
207125_at	g7019592	7768	ZNF225	zinc finger protein 225	Boost: FDR p>0.05, |FC|>1.55 for rho(0αKG)/rho(0CTL)	-1.3	-2.46229	0.00052	0.011666	-2.026	-4.07274	2e-05	0.001213	-0.726	-1.65405	0.01642	0.226327	207125_at	P	P	P	P	P	P	P	P	P	207125_at	8.59317	8.46899	8.34847	7.46195	7.40291	6.64531	6.60553	6.68879	6.03847
207753_at	g10190695	57343	ZNF304	zinc finger protein 304	Boost: FDR p>0.05, |FC|>1.55 for rho(0αKG)/rho(0CTL)	-1.358	-2.5633	0.00181	0.024419	-2.117	-4.33791	8e-05	0.002797	-0.759	-1.69232	0.03718	0.32257	207753_at	P	P	P	P	P	P	P	P	P	207753_at	7.86867	8.10848	7.60606	6.28445	6.89714	6.3273	6.24535	5.02463	5.96082
244030_at	Hs.224818.0	6815	STYX	serine/threonine/tyrosine interacting protein	Boost: FDR p>0.05, |FC|>1.55 for rho(0αKG)/rho(0CTL)	-1.361	-2.56863	0.00027	0.007976	-2.054	-4.15256	1e-05	0.000935	-0.692	-1.61552	0.01638	0.226208	244030_at	P	P	P	P	P	P	P	P	P	244030_at	8.11934	8.15324	8.23003	6.72763	6.31325	7.37761	6.01233	6.27253	6.05638
201896_s_at	g12655140	84722	PSRC1	proline/serine-rich coiled-coil 1	Widen: FDR p<0.05, |FC|>1.55 for rho(0αKG)/rho(0CTL)	-1.363	-2.57219	0.00024	0.007626	-2.868	-7.30052	0	0.000213	-1.505	-2.83825	0.00012	0.025022	201896_s_at	P	P	P	P	P	P	P	P	P	201896_s_at	11.9924	11.3016	10.9819	10.011	9.94856	10.2284	8.43053	8.57834	8.6638
207732_s_at	g10863920	1741	DLG3	discs, large homolog 3 (Drosophila)	Boost: FDR p>0.05, |FC|>1.55 for rho(0αKG)/rho(0CTL)	-1.372	-2.58829	0.00016	0.006035	-2.083	-4.23687	1e-05	0.000677	-0.71	-1.6358	0.01076	0.185617	207732_s_at	P	P	P	M	P	P	P	A	P	207732_s_at	8.50436	8.37421	8.39046	6.54879	7.08733	7.51546	6.47881	6.39322	6.14811
207437_at	g6031188	4857	NOVA1	neuro-oncological ventral antigen 1	Boost: FDR p>0.05, |FC|>1.55 for rho(0αKG)/rho(0CTL)	-1.373	-2.59009	0.00352	0.036506	-2.345	-5.0806	9e-05	0.003024	-0.972	-1.96156	0.02152	0.253045	207437_at	P	P	P	P	P	P	P	P	P	207437_at	6.71406	7.46645	6.53854	5.70099	4.80921	6.09085	4.24441	4.60649	4.83282
228455_at	Hs.126465.0	64783	RBM15	RNA binding motif protein 15	Boost: FDR p>0.05, |FC|>1.55 for rho(0αKG)/rho(0CTL)	-1.377	-2.59728	8e-05	0.004091	-2.259	-4.7866	0	0.000312	-0.882	-1.84293	0.00184	0.081411	228455_at	P	P	P	P	P	P	P	P	P	228455_at	8.74301	9.17436	9.4199	7.69205	7.45118	8.06348	6.903	6.84372	6.81344
215064_at	Hs.287749.0	6309	SC5D	sterol-C5-desaturase	Boost: FDR p>0.05, |FC|>1.55 for rho(0αKG)/rho(0CTL)	-1.39	-2.62079	5e-05	0.003117	-2.038	-4.10676	0	0.000398	-0.648	-1.56699	0.00839	0.165908	215064_at	P	P	P	P	P	P	P	P	P	215064_at	12.1225	11.4919	11.5866	10.463	10.2133	10.3553	9.92839	9.7094	9.45005
239579_at	Hs.201555.0	253152	EPHX4	epoxide hydrolase 4	Boost: FDR p>0.05, |FC|>1.55 for rho(0αKG)/rho(0CTL)	-1.424	-2.68328	0.0029	0.032578	-2.14	-4.40762	0.00018	0.004683	-0.716	-1.64262	0.07225	0.422279	239579_at	P	P	P	P	P	P	P	P	P	239579_at	9.07075	9.53298	9.69134	8.53318	8.34812	7.14223	7.35761	7.56286	6.95514
1556216_s_at	Hs2.348751.1	105370687	LOC105370687	uncharacterized LOC105370687	Boost: FDR p>0.05, |FC|>1.55 for rho(0αKG)/rho(0CTL)	-1.426	-2.68701	0.00129	0.019802	-2.143	-4.4168	7e-05	0.002597	-0.717	-1.64376	0.04588	0.351848	1556216_s_at	P	P	P	P	P	P	P	P	P	1556216_s_at	7.5449	8.13674	8.51952	7.12208	6.6443	6.15644	6.06934	6.15684	5.54636
231880_at	Hs.268044.0	57464	STRIP2	striatin interacting protein 2	Boost: FDR p>0.05, |FC|>1.55 for rho(0αKG)/rho(0CTL)	-1.435	-2.70382	0.00014	0.00555	-2.257	-4.77996	0	0.000529	-0.822	-1.76786	0.00557	0.138108	231880_at	P	P	P	P	P	P	P	P	A	231880_at	9.1156	8.95331	8.63046	7.46484	7.46484	7.46484	6.79064	7.02432	6.11233
236193_at	Hs.146228.0	8347	HIST1H2BC	histone cluster 1, H2bc	Boost: FDR p>0.05, |FC|>1.55 for rho(0αKG)/rho(0CTL)	-1.476	-2.78176	0.00025	0.007736	-2.441	-5.43018	0	0.000606	-0.965	-1.95206	0.00413	0.119005	236193_at	P	P	P	P	P	P	P	A	A	236193_at	5.97491	6.20123	6.59117	4.89964	4.27927	5.15989	4.08006	3.80067	3.56303
203964_at	g4758813	9111	NMI	N-myc (and STAT) interactor	Boost: FDR p>0.05, |FC|>1.55 for rho(0αKG)/rho(0CTL)	-1.481	-2.79142	0.00267	0.0311	-2.146	-4.42599	0.00022	0.005242	-0.665	-1.58557	0.09839	0.477487	203964_at	P	P	P	P	P	P	P	P	P	203964_at	9.59178	9.97665	10.2972	7.85969	8.16411	9.39844	7.99111	7.72393	7.71228
229796_at	Hs.97849.0	51804	SIX4	SIX homeobox 4	Boost: FDR p>0.05, |FC|>1.55 for rho(0αKG)/rho(0CTL)	-1.498	-2.82451	0.00086	0.015691	-2.152	-4.44443	6e-05	0.002432	-0.654	-1.57352	0.0614	0.394379	229796_at	P	P	P	P	P	P	P	P	P	229796_at	9.46114	9.39408	9.63576	7.70148	7.45851	8.8356	7.40901	7.40913	7.21626
242956_at	Hs.270622.0	3417	IDH1	isocitrate dehydrogenase 1 (NADP+)	Boost: FDR p>0.05, |FC|>1.55 for rho(0αKG)/rho(0CTL)	-1.517	-2.86195	0.0001	0.004683	-2.385	-5.22344	0	0.000437	-0.868	-1.82513	0.00441	0.123106	242956_at	P	P	P	P	P	P	A	P	A	242956_at	7.64861	6.82006	6.82316	5.55243	5.74683	5.44213	4.47506	4.80907	4.85356
223434_at	g12052883	2635	GBP3	guanylate binding protein 3	Boost: FDR p>0.05, |FC|>1.55 for rho(0αKG)/rho(0CTL)	-1.594	-3.01885	0.00334	0.035422	-2.799	-6.95958	7e-05	0.002563	-1.204	-2.30378	0.01528	0.218433	223434_at	P	P	P	P	P	P	P	P	A	223434_at	6.32717	7.55055	7.73224	5.3386	5.84203	5.64621	3.91354	5.0991	4.20127
218723_s_at	g7662650	28984	RGCC	regulator of cell cycle	Boost: FDR p>0.05, |FC|>1.55 for rho(0αKG)/rho(0CTL)	-1.618	-3.06949	0.00069	0.013821	-2.332	-5.03503	5e-05	0.002042	-0.714	-1.64035	0.05258	0.37062	218723_s_at	P	P	P	P	P	P	P	P	P	218723_s_at	9.3597	9.40425	8.4751	7.15957	7.10248	8.12193	6.73021	6.90975	6.60262
211538_s_at	g4204879	3306	HSPA2	heat shock 70kDa protein 2	Widen: FDR p<0.05, |FC|>1.55 for rho(0αKG)/rho(0CTL)	-1.626	-3.08656	0.00014	0.005537	-3.384	-10.4396	0	0.000159	-1.758	-3.38229	8e-05	0.021893	211538_s_at	P	P	P	P	P	P	P	A	P	211538_s_at	9.11763	8.80838	8.5661	7.27888	7.42134	6.91322	5.95967	5.39279	4.98835
209989_at	g12584158	10795	ZNF268	zinc finger protein 268	Boost: FDR p>0.05, |FC|>1.55 for rho(0αKG)/rho(0CTL)	-1.63	-3.09513	0.00125	0.019594	-2.472	-5.54812	6e-05	0.002454	-0.842	-1.79253	0.0406	0.334456	209989_at	P	P	P	P	P	P	P	P	A	209989_at	7.26487	7.42608	7.70303	6.10949	6.50202	4.89234	5.15249	4.94257	4.88209
40284_at	4920275	3170	FOXA2	forkhead box A2	Widen: FDR p<0.05, |FC|>1.55 for rho(0αKG)/rho(0CTL)	-1.659	-3.15798	3e-05	0.002486	-3.109	-8.62784	0	0.000116	-1.45	-2.73208	0.0001	0.023372	40284_at	P	P	P	P	P	P	P	P	P	40284_at	10.5707	10.8583	10.1209	8.8277	8.81682	8.92933	7.26678	7.15463	7.80182
219894_at	g9506924	54551	MAGEL2	MAGE family member L2	Boost: FDR p>0.05, |FC|>1.55 for rho(0αKG)/rho(0CTL)	-1.665	-3.17114	1e-05	0.001377	-2.364	-5.14796	0	0.00022	-0.699	-1.62338	0.00561	0.138515	219894_at	P	P	P	A	P	P	A	A	A	219894_at	9.58095	9.20247	9.04635	7.25575	7.70944	7.86881	6.833	6.86175	7.04306
205234_at	g4759113	9122	SLC16A4	solute carrier family 16, member 4	Widen (marginal): FDR p<0.05, |FC|<1.55 for rho(0αKG)/rho(0CTL)	-1.669	-3.17994	0	6.5e-05	-2.21	-4.62675	0	1.1e-05	-0.541	-1.45498	0.00044	0.043279	205234_at	P	P	P	P	P	P	P	P	A	205234_at	6.80666	6.68608	6.76788	5.09063	5.09063	5.07192	4.54625	4.48853	4.59473
228304_at	Hs.20255.0	375287	RBM43	RNA binding motif protein 43	Boost: FDR p>0.05, |FC|>1.55 for rho(0αKG)/rho(0CTL)	-1.69	-3.22657	0.00047	0.011039	-2.416	-5.33689	3e-05	0.001637	-0.727	-1.65519	0.04724	0.355825	228304_at	P	P	P	P	P	P	P	P	P	228304_at	7.1571	7.26303	7.05442	4.90387	5.2251	6.27632	4.40519	4.91659	4.90387
210103_s_at	g4958949	3170	FOXA2	forkhead box A2	Widen: FDR p<0.05, |FC|>1.55 for rho(0αKG)/rho(0CTL)	-1.697	-3.24226	1e-05	0.000944	-2.922	-7.57896	0	6.2e-05	-1.225	-2.33755	8e-05	0.021989	210103_s_at	P	P	P	P	P	P	P	P	P	210103_s_at	10.4072	10.6711	9.92177	8.62248	8.66406	8.62248	7.43528	7.2923	7.50788
218490_s_at	g8923850	55900	ZNF302	zinc finger protein 302	Boost: FDR p>0.05, |FC|>1.55 for rho(0αKG)/rho(0CTL)	-1.747	-3.3566	0.00157	0.022408	-2.788	-6.90672	6e-05	0.002267	-1.041	-2.05765	0.02597	0.274004	218490_s_at	P	P	P	P	P	P	P	P	P	218490_s_at	8.42893	9.10093	8.93756	7.50446	7.63676	6.08554	5.7555	5.96299	6.3863
228653_at	Hs.110406.0	389432	SAMD5	sterile alpha motif domain containing 5	Boost: FDR p>0.05, |FC|>1.55 for rho(0αKG)/rho(0CTL)	-1.804	-3.49187	0.00018	0.006341	-2.477	-5.56739	2e-05	0.00111	-0.673	-1.59438	0.04834	0.358863	228653_at	P	P	P	P	P	P	P	P	P	228653_at	9.95876	10.0575	9.44094	7.63019	7.67136	8.74324	7.43214	7.20481	7.38954
224027_at	g12002126	56477	CCL28	chemokine (C-C motif) ligand 28	Boost: FDR p>0.05, |FC|>1.55 for rho(0αKG)/rho(0CTL)	-1.827	-3.54799	2e-05	0.001913	-2.753	-6.74117	0	0.000234	-0.926	-1.9	0.00283	0.099612	224027_at	P	P	P	P	P	M	A	A	A	224027_at	7.48178	7.63299	7.06905	5.55244	5.62159	5.52883	4.50765	5.1404	4.27751
227491_at	Hs.17519.0	79071	ELOVL6	ELOVL fatty acid elongase 6	Widen: FDR p<0.05, |FC|>1.55 for rho(0αKG)/rho(0CTL)	-1.908	-3.75288	1e-05	0.001159	-3.428	-10.7629	0	6.2e-05	-1.52	-2.86791	5e-05	0.018753	227491_at	P	P	P	P	P	P	P	P	P	227491_at	10.6813	10.0434	10.0652	8.45396	8.52736	8.08493	6.62793	6.78971	7.0883
242794_at	Hs.177135.0	55534	MAML3	mastermind-like transcriptional coactivator 3	Boost: FDR p>0.05, |FC|>1.55 for rho(0αKG)/rho(0CTL)	-1.92	-3.78423	0.00015	0.00562	-2.625	-6.16884	1e-05	0.00099	-0.705	-1.63014	0.04653	0.353861	242794_at	P	P	P	P	P	P	P	P	P	242794_at	10.1932	10.2132	10.3369	8.0456	7.92188	9.01462	7.85144	7.91192	7.10505
202878_s_at	g11496985	22918	CD93	CD93 molecule	Boost: FDR p>0.05, |FC|>1.55 for rho(0αKG)/rho(0CTL)	-1.921	-3.78685	0.00183	0.024629	-2.58	-5.9794	0.00025	0.005636	-0.658	-1.57789	0.16944	0.579394	202878_s_at	P	P	P	A	M	P	A	A	A	202878_s_at	7.17907	8.26081	6.33748	4.8956	5.45743	5.65998	4.81676	4.23156	4.98984
220945_x_at	g8922334	54682	MANSC1	MANSC domain containing 1	Widen: FDR p<0.05, |FC|>1.55 for rho(0αKG)/rho(0CTL)	-1.943	-3.84504	0.00021	0.007032	-3.644	-12.5012	0	0.000307	-1.701	-3.25126	0.00054	0.046787	220945_x_at	P	P	P	P	P	P	A	M	P	220945_x_at	10.33	9.15822	10.59	8.02134	8.3156	7.91271	6.23498	6.37772	6.53351
224604_at	Hs.173705.0	401152	C4orf3	chromosome 4 open reading frame 3	Boost: FDR p>0.05, |FC|>1.55 for rho(0αKG)/rho(0CTL)	-2.014	-4.03901	6e-05	0.003518	-3.015	-8.08361	0	0.000408	-1.001	-2.00139	0.00688	0.151601	224604_at	P	P	P	P	P	P	P	P	P	224604_at	10.3844	10.9057	10.9276	8.34801	8.4181	9.40957	7.60698	7.97008	7.59626
203178_at	g4503932	2628	GATM	glycine amidinotransferase (L-arginine:glycine amidinotransferase)	Boost: FDR p>0.05, |FC|>1.55 for rho(0αKG)/rho(0CTL)	-2.122	-4.35297	5e-05	0.003122	-3.348	-10.1824	0	0.000292	-1.226	-2.33918	0.00245	0.092815	203178_at	P	P	P	P	P	P	P	P	P	203178_at	8.41772	8.74481	7.82069	5.91297	5.8713	6.83213	5.07875	4.93571	4.92489
232504_at	Hs.157752.0	285628	LOC285628	MIR146A host gene	Boost: FDR p>0.05, |FC|>1.55 for rho(0αKG)/rho(0CTL)	-2.158	-4.46296	0.00047	0.011016	-2.976	-7.86802	4e-05	0.001935	-0.818	-1.76296	0.07334	0.424852	232504_at	P	P	P	P	P	P	P	P	P	232504_at	9.39678	10.0048	10.6899	8.20406	8.33078	7.08268	6.67386	7.05699	7.43223
224605_at	Hs.173705.0	401152	C4orf3	chromosome 4 open reading frame 3	Boost: FDR p>0.05, |FC|>1.55 for rho(0αKG)/rho(0CTL)	-2.196	-4.58207	2e-05	0.002083	-3.026	-8.14548	0	0.000345	-0.83	-1.77769	0.0153	0.218607	224605_at	P	P	P	P	P	P	P	P	P	224605_at	9.91808	10.3389	10.2402	7.63374	7.70638	8.56805	7.42812	7.27215	6.7184
216733_s_at	Hs.75335.3	2628	GATM	glycine amidinotransferase (L-arginine:glycine amidinotransferase)	Boost: FDR p>0.05, |FC|>1.55 for rho(0αKG)/rho(0CTL)	-2.207	-4.61714	0.00029	0.008344	-2.992	-7.95576	3e-05	0.001511	-0.786	-1.72429	0.07176	0.420911	216733_s_at	P	P	P	P	A	P	A	A	P	216733_s_at	7.20893	7.85782	6.6937	4.93439	4.38151	5.82502	4.25159	4.01231	4.52035
222153_at	Hs.44268.1	50804	MYEF2	myelin expression factor 2	Widen: FDR p<0.05, |FC|>1.55 for rho(0αKG)/rho(0CTL)	-2.254	-4.77004	0	8.4e-05	-3.264	-9.60643	0	1e-05	-1.011	-2.01531	6e-05	0.019721	222153_at	P	P	P	P	P	P	P	P	A	222153_at	8.09334	8.30415	8.05372	5.91774	5.82069	5.95169	4.97808	5.05901	4.62092
228792_at	Hs.6638.0	50804	MYEF2	myelin expression factor 2	Boost: FDR p>0.05, |FC|>1.55 for rho(0αKG)/rho(0CTL)	-2.285	-4.87364	1e-05	0.001504	-3.349	-10.1894	0	0.000212	-1.064	-2.09072	0.00348	0.109843	228792_at	P	P	P	P	P	P	P	P	A	228792_at	7.8883	7.97012	7.97178	5.5252	5.26622	6.18278	5.11634	4.37254	4.29317
227801_at	Hs.36830.0	286827	TRIM59	tripartite motif containing 59	Widen: FDR p<0.05, |FC|>1.55 for rho(0αKG)/rho(0CTL)	-2.287	-4.8804	0	0.000456	-3.544	-11.6641	0	4e-05	-1.257	-2.38998	0.00017	0.028692	227801_at	P	P	P	P	P	P	P	P	P	227801_at	9.62694	9.51643	9.27941	7.12208	7.58468	6.85474	5.7702	5.83324	6.18718
1557383_a_at	Hs2.212617.1	105376896	LOC105376896	uncharacterized LOC105376896	Boost: FDR p>0.05, |FC|>1.55 for rho(0αKG)/rho(0CTL)	-2.351	-5.10178	4e-05	0.002718	-3.672	-12.7462	0	0.000279	-1.321	-2.49839	0.00245	0.092815	1557383_a_at	P	P	P	P	P	P	P	P	P	1557383_a_at	9.79923	9.82954	9.22928	6.92874	7.22329	7.65362	5.46385	6.6286	5.74921
242056_at	Hs.145383.0	80263	TRIM45	tripartite motif containing 45	Boost: FDR p>0.05, |FC|>1.55 for rho(0αKG)/rho(0CTL)	-2.422	-5.35913	0	0.000284	-3.31	-9.91766	0	4.3e-05	-0.888	-1.85061	0.00127	0.068629	242056_at	P	P	P	P	P	P	P	P	P	242056_at	9.73281	9.76744	9.70574	7.2069	6.97566	7.75857	6.24149	6.5196	6.51483
219583_s_at	g13384599	55812	SPATA7	spermatogenesis associated 7	Boost: FDR p>0.05, |FC|>1.55 for rho(0αKG)/rho(0CTL)	-2.444	-5.44148	0.00014	0.005596	-3.421	-10.7108	1e-05	0.000895	-0.977	-1.96837	0.03294	0.304668	219583_s_at	P	P	P	P	P	P	P	A	P	219583_s_at	8.08939	8.96933	9.38508	6.07252	5.90922	7.13058	5.66985	5.12272	5.38738
225283_at	Hs.6093.0	91947	ARRDC4	arrestin domain containing 4	Boost: FDR p>0.05, |FC|>1.55 for rho(0αKG)/rho(0CTL)	-2.714	-6.56138	2e-05	0.001902	-3.724	-13.214	0	0.000329	-1.01	-2.01391	0.01519	0.217732	225283_at	P	P	P	P	P	P	A	A	P	225283_at	6.79258	7.96497	8.10072	4.88107	5.18765	4.64798	3.53779	3.9406	4.20884
228489_at	Hs.22026.0	116441	TM4SF18	transmembrane 4 L six family member 18	Boost: FDR p>0.05, |FC|>1.55 for rho(0αKG)/rho(0CTL)	-2.755	-6.75053	0.00542	0.047557	-3.495	-11.2746	0.00127	0.015754	-0.74	-1.67018	0.35378	0.741617	228489_at	P	P	P	P	P	A	A	P	A	228489_at	10.4286	8.12196	7.7906	6.98789	6.49476	4.5921	5.53434	5.43864	4.88209
235476_at	Hs.125759.0	286827	TRIM59	tripartite motif containing 59	Widen: FDR p<0.05, |FC|>1.55 for rho(0αKG)/rho(0CTL)	-2.775	-6.84476	0	0.0002	-3.89	-14.8254	0	2.6e-05	-1.115	-2.16595	0.00045	0.04362	235476_at	P	P	P	P	P	P	A	P	A	235476_at	9.81923	9.29586	9.1029	6.85737	6.73717	6.29849	5.50383	5.45502	5.58809
230061_at	Hs.22120.0	116441	TM4SF18	transmembrane 4 L six family member 18	Boost: FDR p>0.05, |FC|>1.55 for rho(0αKG)/rho(0CTL)	-2.853	-7.22501	0.00269	0.031281	-3.956	-15.5194	0.0003	0.006356	-1.104	-2.1495	0.14713	0.551531	230061_at	P	P	P	P	P	P	P	P	P	230061_at	10.2714	8.06053	8.50311	7.05143	6.30964	4.91627	4.72809	4.34585	5.89241
1569077_x_at	Hs2.247153.1	162962	ZNF836	zinc finger protein 836	Boost: FDR p>0.05, |FC|>1.55 for rho(0αKG)/rho(0CTL)	-2.884	-7.38194	0.00024	0.007651	-3.905	-14.9804	2e-05	0.00138	-1.021	-2.02933	0.06793	0.411603	1569077_x_at	P	P	P	A	P	P	A	A	P	1569077_x_at	9.34225	9.46028	8.62373	5.27492	6.23654	7.26274	4.89437	4.8723	5.94386
213142_x_at	Hs.12969.0	54103	GSAP	gamma-secretase activating protein	Widen: FDR p<0.05, |FC|>1.55 for rho(0αKG)/rho(0CTL)	-2.902	-7.47462	0	1.7e-05	-3.908	-15.0115	0	3e-06	-1.007	-2.00973	5e-05	0.017661	213142_x_at	P	P	P	P	P	P	A	A	A	213142_x_at	7.77628	7.4931	7.88529	4.72098	4.99597	4.73275	3.85805	3.80298	3.76839
222150_s_at	Hs.12969.1	54103	GSAP	gamma-secretase activating protein	Widen: FDR p<0.05, |FC|>1.55 for rho(0αKG)/rho(0CTL)	-3.011	-8.06123	0	1.1e-05	-3.697	-12.969	0	3e-06	-0.686	-1.60882	0.00054	0.046771	222150_s_at	P	P	P	P	P	P	A	A	A	222150_s_at	8.46766	8.27509	8.69736	5.40728	5.54873	5.45012	4.7358	4.85448	4.7584
1555233_at	Hs2.243010.2	57381	RHOJ	ras homolog family member J	Boost: FDR p>0.05, |FC|>1.55 for rho(0αKG)/rho(0CTL)	-3.045	-8.25347	0.00014	0.005592	-3.902	-14.9492	2e-05	0.001277	-0.857	-1.81127	0.10972	0.497345	1555233_at	P	P	P	P	P	A	A	A	A	1555233_at	10.4224	8.46913	10.3542	7.09629	6.80266	6.21207	5.66766	5.71378	6.1594
223044_at	g12053382	30061	SLC40A1	solute carrier family 40 (iron-regulated transporter), member 1	Boost: FDR p>0.05, |FC|>1.55 for rho(0αKG)/rho(0CTL)	-3.071	-8.40356	0	0.000517	-3.963	-15.5949	0	0.000116	-0.892	-1.85575	0.01126	0.189633	223044_at	P	P	P	P	P	P	P	A	A	223044_at	7.42979	8.19938	8.4102	4.91228	4.70087	5.21391	4.41968	3.68235	4.04895
235489_at	Hs.243010.1	57381	RHOJ	ras homolog family member J	Boost: FDR p>0.05, |FC|>1.55 for rho(0αKG)/rho(0CTL)	-4.002	-16.0222	0.00012	0.005254	-5.211	-37.0397	2e-05	0.001137	-1.209	-2.31177	0.08448	0.448545	235489_at	P	P	P	P	P	A	A	A	A	235489_at	10.0104	8.18478	10.6468	5.8664	6.31825	4.65105	3.9379	4.75531	4.51481
201008_s_at	Hs.179526.0	10628	TXNIP	thioredoxin interacting protein	Boost: FDR p>0.05, |FC|>1.55 for rho(0αKG)/rho(0CTL)	-4.4	-21.1121	0	0.000415	-5.533	-46.3019	0	0.000109	-1.133	-2.19314	0.01635	0.22601	201008_s_at	P	P	P	P	A	P	A	A	A	201008_s_at	11.1525	11.2247	11.1433	6.40502	6.17183	7.74351	5.2697	5.49607	6.1552
201010_s_at	g5454161	10628	TXNIP	thioredoxin interacting protein	Boost: FDR p>0.05, |FC|>1.55 for rho(0αKG)/rho(0CTL)	-4.656	-25.2113	1e-05	0.001258	-6.795	-111.045	0	0.000176	-2.139	-4.40457	0.0029	0.100263	201010_s_at	P	P	P	P	P	P	P	M	P	201010_s_at	12.2154	12.615	12.784	7.0034	7.30108	9.34161	5.81976	5.3838	6.02663

## Sheet: genes target of HIF1a
DM-aKG-sensitive genes that are targets of HIF1a
CDCP1
CDKN1A
CXCL8
ENO2
FN1
HSPB1
IL1B
ITPR1
NOX4
PTGS2
SERPINE1
SLC16A4
SMAD7
SPHK1
VEGFA

## Sheet: genes enriched for EP300
GENES SHOWN BY ENCODE TO BE IN ep300 ChIP-SEQ EXPERIMENTS
ABCA1
ABCC3
ABCG1
ACOX2
ADAMTS1
ADAMTS5
ADAMTS6
AGFG2
ALCAM
ALS2
ANKRD10
ANKRD36B
APCDD1L
ARHGAP31
ARHGAP32
ARRDC4
ASF1B
ATF7IP2
ATP10A
ATP7A
BAG2
BAZ2B
BBIP1
BCL6
BCOR
BHLHE40
BIRC5
BMP4
BORA
BPGM
BRCA1
BRWD1
C11ORF63
C15ORF57
C1ORF43
C1ORF52
C20ORF196
C21ORF58
C8ORF4
CBX2
CCDC144B
CCDC15
CCND3
CCNL2
CD58
CDCA2
CDCA5
CDCA8
CENPW
CHAC2
CHD2
CHST11
CLCN6
CLEC2D
CLK4
CNIH4
COL4A4
COL5A3
COL7A1
COL8A1
COQ10B
COX18
COX5A
CSGALNACT2
CYB5R3
CYP2U1
DAAM1
DBT
DCAF13
DGKE
DIP2A
DLC1
DLD
DLG1
DLX1
DMTF1
DPYD
DSP
DST
DTL
DUSP6
EBAG9
EFHB
EIF1
ELOF1
ELOVL6
ENDOV
ENPP1
EPG5
ERN1
ETV6
EXO1
FAH
FAM174B
FAM43B
FAM84B
FAP
FGD4
FGF9
FN1
FOSL2
FOXA2
GABRE
GART
GATS
GBP3
GDPD1
GGCX
GINS4
GLIS3
GLUL
GMNN
GOLPH3L
GPR107
H2AFJ
HAS2
HERPUD1
HIRIP3
HIST1H2AG
HIST1H2BC
HIST1H2BD
HIST1H2BG
HIST1H4B
HIVEP2
HNRNPD
HNRNPF
HNRNPU
HOPX
HOXB5
HOXB6
HSPA2
HSPB1
HSPD1
HSPH1
ICAM1
ICMT
IDH1
IFT81
IL1A
IL1B
IL24
IL6ST
INSIG2
INSR
IQCG
IRAK2
ITPR1
ITPRIPL1
ITSN2
JMJD1C
JUNB
KBTBD11
KBTBD6
KBTBD7
KDM6B
KIAA0355
KIF18A
KIF1A
KIF20A
KIF20B
KIF2C
KLF3
KLHL24
KLHL9
KRCC1
KSR1
LBH
LETM2
LINC00460
LLPH
LOC100505549
LOC100507600
LOC645513
LPAR3
LRIF1
LRRC15
LSM7
LUC7L
LY96
MAGEL2
MAGI3
MAML3
MANSC1
MED28
MEGF11
MEPCE
METTL13
MICALCL
MICALL1
MIR210HG
MKL1
MLX
MMACHC
MPDZ
MRPL35
MRPL4
MRPL41
MRPS34
MTMR9LP
NAPA
NCOA7
NDUFA11
NDUFB10
NEDD9
NIPAL4
NMI
NOVA1
NRCAM
OBFC1
OGT
ORC1
PA2G4
PANK2
PAPPA
PARP8
PARVA
PCDH9
PCMTD2
PCNX
PDE12
PDE4D
PDGFD
PDS5A
PER2
PEX11A
PGK1
PHB
PIK3R1
PITPNC1
PLD6
PNPO
PNRC1
POLD3
POLE3
POLI
POLR2L
POLR3K
POMZP3
PPP1R12B
PPP2CA
PRKDC
PROSC
PSMA3
PSMC3
PTGS2
PTPRF
RAPGEF2
RAPGEF4
RBM14
RBM15
RBM39
RBM43
RERE
RFX3
RHOB
RMND5B
RNASEH2B
RNF113A
RPL32P3
RRP36
RUFY3
RUNX1T1
SAMD5
SARS
SAT1
SAV1
SEMA4B
SEMA7A
SERPINE1
SERTAD4
SFXN4
SH3TC2
SIX4
SKP2
SLC1A4
SLC25A36
SLC25A37
SLC2A3
SLC35G1
SLC38A2
SLC39A10
SLC5A3
SLC6A6
SLC7A8
SLFN11
SMAD7
SNRNP25
SNX9
SORD
SOWAHC
SOX4
SPATS2
SPATS2L
SREK1IP1
ST6GALNAC4
ST7L
STK17B
STYX
SUFU
SVIP
SYCP2
TACO1
TBX3
TCEA1
TCP11L2
TFAP2A
TGFB2
TIGD7
TIMM8B
TM4SF1
TMCO6
TMEM107
TOB1
TOR1AIP2
TPCN2
TRAPPC4
TRIB2
TRIB3
TRIM45
TRIM59
TTBK2
TTC30B
TTC39B
TTPA
TUBE1
TUFM
TXNIP
UBE2L3
UNC5B
USP43
VASN
VEGFA
VLDLR
VPS13A
XKRX
XPNPEP3
ZBED4
ZBTB1
ZNF107
ZNF225
ZNF268
ZNF302
ZNF304
ZNF367
ZNF391
ZNF426
ZNF451
ZNF548
ZNF621
ZNF700
ZNF776
ZNHIT1

## Sheet: aKG Null Effect
Probe Set ID	Transcript ID (Array Design)	Entrez Gene	Gene Symbol	Gene Title	aKG Effect w.r.t ρ(0CTL)/ρ(+)	log2FC ρ(0CTL)/ρ(+)	Fold-Change ρ(0CTL)/ρ(+)	p.value (Rho+ vs Rho0_Ctl)	FDR (Rho+ vs Rho0_Ctl)	log2FC ρ(0αKG)/ρ(+)	Fold-Change ρ(0αKG)/ρ(+)	p.value (Rho+ vs Rho0_KG)	FDR (Rho+ vs Rho0_KG)	log2FC ρ(0αKG)/ρ(0CTL)	Fold-Change ρ(0αKG)/ρ(0CTL)	p.value (Rho0_KG vs Rho0_Ctl)	FDR (Rho0_KG vs Rho0_Ctl)	Probe Set ID	18911_Rho+ Detection Call	18912_Rho+ Detection Call	18913_Rho+ Detection Call	18914_Rho0_Ctl Detection Call	18915_Rho0_Ctl Detection Call	18916_Rho0_Ctl Detection Call	18917_Rho0+alpha_KG Detection Call	18918_Rho0+alpha_KG Detection Call	18919_Rho0+alpha_KG Detection Call	Probe Set ID	18911_Rho+ RMA	18912_Rho+ RMA	18913_Rho+ RMA	18914_Rho0_Ctl RMA	18915_Rho0_Ctl RMA	18916_Rho0_Ctl RMA	18917_Rho0+alpha_KG RMA	18918_Rho0+alpha_KG RMA	18919_Rho0+alpha_KG RMA
213479_at	Hs.3281.0	4885	NPTX2	neuronal pentraxin II	Null: FDR p>0.05, |FC|<1.55 for ρ(0αKG)/ρ(0CTL)	6.322	80.004	0	2e-06	6.147	70.8649	0	3e-06	-0.176	-1.12975	0.41676	0.783364	213479_at	A	A	A	P	P	P	P	P	P	213479_at	3.84781	4.14095	4.46915	10.6356	10.6796	10.1098	10.4268	10.1098	10.3617
232847_at	Hs.172597.0	27164	SALL3	spalt-like transcription factor 3	Null: FDR p>0.05, |FC|<1.55 for ρ(0αKG)/ρ(0CTL)	5.37	41.3553	0	4e-06	5.59	48.1679	0	3e-06	0.22	1.16473	0.2969	0.699792	232847_at	A	A	A	P	P	P	P	P	P	232847_at	3.24788	3.76346	2.97076	8.89405	8.70725	8.49205	8.93735	8.93642	8.87836
1553411_s_at	Hs2.432482.1	27164	SALL3	spalt-like transcription factor 3	Null: FDR p>0.05, |FC|<1.55 for ρ(0αKG)/ρ(0CTL)	5.135	35.139	0	2e-06	5.101	34.3205	0	2e-06	-0.033	-1.02314	0.83813	0.958507	1553411_s_at	A	A	A	P	P	P	P	P	P	1553411_s_at	3.06649	3.10328	3.01296	8.10953	8.52482	7.95309	8.00797	8.2832	8.19592
230785_at	Hs.23210.0	27164	SALL3	spalt-like transcription factor 3	Null: FDR p>0.05, |FC|<1.55 for ρ(0αKG)/ρ(0CTL)	4.943	30.7603	0	7e-06	5.314	39.7808	0	4e-06	0.371	1.29325	0.0961	0.473264	230785_at	A	A	A	P	P	P	P	P	P	230785_at	4.86788	4.84049	4.26659	9.72444	9.80461	9.27554	9.87436	10.0784	9.96506
243672_at	Hs.278558.0	27164	SALL3	spalt-like transcription factor 3	Null: FDR p>0.05, |FC|<1.55 for ρ(0αKG)/ρ(0CTL)	4.782	27.5122	0	1.3e-05	4.868	29.2021	0	1e-05	0.086	1.06142	0.70101	0.913026	243672_at	A	A	A	P	P	P	P	P	P	243672_at	3.37924	3.62135	3.53583	8.12741	7.91663	8.83901	8.37407	8.3142	8.45196
242326_at	Hs.116394.0	169044	COL22A1	collagen, type XXII, alpha 1	Null: FDR p>0.05, |FC|<1.55 for ρ(0αKG)/ρ(0CTL)	4.509	22.769	0	3.7e-05	4.812	28.0903	0	2e-05	0.303	1.23371	0.24599	0.657958	242326_at	A	A	A	P	P	P	P	P	P	242326_at	4.59419	4.53062	4.44292	9.35696	9.35629	8.38069	9.41674	9.18804	9.39767
202202_s_at	g9845494	3910	LAMA4	laminin, alpha 4	Null: FDR p>0.05, |FC|<1.55 for ρ(0αKG)/ρ(0CTL)	4.505	22.706	0	0.000155	5.073	33.6609	0	6.9e-05	0.568	1.48247	0.10987	0.497518	202202_s_at	P	P	P	P	P	P	P	P	P	202202_s_at	6.52912	7.46645	7.09946	11.9501	11.8234	10.8359	12.0081	11.9897	12.3164
1552767_a_at	Hs2.82302.2	90161	HS6ST2	heparan sulfate 6-O-sulfotransferase 2	Null: FDR p>0.05, |FC|<1.55 for ρ(0αKG)/ρ(0CTL)	4.07	16.7955	0	4e-05	3.755	13.5011	0	5.1e-05	-0.314	-1.24315	0.19372	0.608905	1552767_a_at	A	A	A	P	P	P	P	P	P	1552767_a_at	4.29607	4.55745	4.04664	8.74321	8.48548	7.88035	8.10485	8.14046	7.92133
204614_at	g4505594	5055	SERPINB2	serpin peptidase inhibitor, clade B (ovalbumin), member 2	Null: FDR p>0.05, |FC|<1.55 for ρ(0αKG)/ρ(0CTL)	3.798	13.9095	0.00191	0.025236	3.261	9.58647	0.0048	0.037257	-0.537	-1.45095	0.55547	0.852083	204614_at	A	A	P	P	P	P	P	P	P	204614_at	4.13157	4.44202	4.91326	9.56016	9.58323	5.73714	7.87686	7.89347	7.49988
202016_at	g4505154	4232	MEST	mesoderm specific transcript	Null: FDR p>0.05, |FC|<1.55 for ρ(0αKG)/ρ(0CTL)	3.742	13.3799	0.00414	0.040432	4.24	18.8959	0.00194	0.020699	0.497	1.41128	0.62422	0.882088	202016_at	P	A	A	P	P	P	P	P	P	202016_at	7.13771	4.90748	4.34411	10.43	10.3441	6.84261	9.89241	9.68138	9.535
1569290_s_at	Hs2.382602.1	2892	GRIA3	glutamate receptor, ionotropic, AMPA 3	Null: FDR p>0.05, |FC|<1.55 for ρ(0αKG)/ρ(0CTL)	3.734	13.306	0	0.000406	4.011	16.1225	0	0.000211	0.276	1.21083	0.41549	0.78263	1569290_s_at	P	A	P	P	P	P	P	P	P	1569290_s_at	5.00552	3.62728	3.88489	8.25042	7.69107	7.77861	8.03379	8.26521	8.25042
230030_at	Hs.82302.0	90161	HS6ST2	heparan sulfate 6-O-sulfotransferase 2	Null: FDR p>0.05, |FC|<1.55 for ρ(0αKG)/ρ(0CTL)	3.553	11.7371	0	6.6e-05	2.988	7.93373	0	0.000126	-0.565	-1.47939	0.02717	0.279558	230030_at	A	A	A	P	P	P	P	P	P	230030_at	3.97653	3.36791	3.71916	7.2765	7.60573	6.84132	6.57277	6.71597	6.73857
242414_at	Hs.148324.0	23475	QPRT	quinolinate phosphoribosyltransferase	Null: FDR p>0.05, |FC|<1.55 for ρ(0αKG)/ρ(0CTL)	3.473	11.1039	0	0.000665	2.997	7.98338	1e-05	0.000889	-0.476	-1.39088	0.19446	0.609621	242414_at	A	A	P	P	P	P	P	P	P	242414_at	5.8915	6.09809	7.06854	9.44078	9.5994	10.4367	9.14018	9.46822	9.44003
1569334_at	Hs2.156362.1	64220	STRA6	stimulated by retinoic acid 6	Null: FDR p>0.05, |FC|<1.55 for ρ(0αKG)/ρ(0CTL)	3.184	9.08823	6e-05	0.003321	3.641	12.4753	2e-05	0.001244	0.458	1.37364	0.33297	0.727965	1569334_at	P	A	P	P	P	P	P	P	P	1569334_at	6.18207	4.09863	5.07169	8.47896	8.52668	7.898	8.788	9.01714	8.47149
206343_s_at	g7669517	3084	NRG1	neuregulin 1	Null: FDR p>0.05, |FC|<1.55 for ρ(0αKG)/ρ(0CTL)	3.171	9.00671	0	0.00023	3.545	11.6722	0	0.000102	0.374	1.29594	0.15648	0.563945	206343_s_at	P	P	P	P	P	P	P	P	P	206343_s_at	7.7891	7.38187	6.6657	10.5021	10.5017	10.3448	10.8048	10.8569	10.8092
206421_s_at	g4505148	8710	SERPINB7	serpin peptidase inhibitor, clade B (ovalbumin), member 7	Null: FDR p>0.05, |FC|<1.55 for ρ(0αKG)/ρ(0CTL)	3.157	8.91973	0.00194	0.02542	2.746	6.70855	0.0045	0.035736	-0.411	-1.32961	0.58713	0.866156	206421_s_at	A	A	A	P	P	P	P	P	P	206421_s_at	3.24416	2.89931	3.03828	7.28204	7.29485	4.07656	5.54376	5.88852	5.98786
1569335_a_at	Hs2.156362.1	64220	STRA6	stimulated by retinoic acid 6	Null: FDR p>0.05, |FC|<1.55 for ρ(0αKG)/ρ(0CTL)	3.081	8.46201	2e-05	0.00194	3.611	12.2185	1e-05	0.000677	0.529	1.44293	0.20217	0.616521	1569335_a_at	P	A	A	P	P	P	P	P	P	1569335_a_at	6.71298	5.06077	5.97375	9.47815	9.02506	8.48816	9.56504	9.55949	9.45504
206939_at	g4885174	1630	DCC	DCC netrin 1 receptor	Null: FDR p>0.05, |FC|<1.55 for ρ(0αKG)/ρ(0CTL)	3.014	8.07801	0	6.5e-05	3.436	10.8228	0	2.5e-05	0.421	1.33886	0.04467	0.348368	206939_at	A	A	A	P	P	P	P	P	P	206939_at	5.3809	5.43094	5.54002	8.79759	8.54687	8.05089	8.87696	8.80583	8.97609
235599_at	Hs.125346.0	339535	LINC01139	long intergenic non-protein coding RNA 1139	Null: FDR p>0.05, |FC|<1.55 for ρ(0αKG)/ρ(0CTL)	2.89	7.4127	0	0.000773	2.439	5.42266	2e-05	0.001152	-0.451	-1.36699	0.15786	0.565558	235599_at	A	A	A	P	P	P	P	P	P	235599_at	3.48526	3.305	3.305	5.62521	6.1516	6.98938	5.66818	5.73808	6.00606
232317_at	Hs.169129.0	91584	PLXNA4	plexin A4	Null: FDR p>0.05, |FC|<1.55 for ρ(0αKG)/ρ(0CTL)	2.881	7.36661	0	0.0002	2.846	7.19004	0	0.000159	-0.036	-1.02527	0.87235	0.968981	232317_at	A	A	P	P	P	P	P	P	P	232317_at	5.86887	5.71258	6.52287	8.9319	8.80256	9.01394	8.69062	8.8108	9.14027
209687_at	g1754834	6387	CXCL12	chemokine (C-X-C motif) ligand 12	Null: FDR p>0.05, |FC|<1.55 for ρ(0αKG)/ρ(0CTL)	2.869	7.30559	0	3.5e-05	3.02	8.11168	0	2e-05	0.151	1.11034	0.35134	0.73981	209687_at	A	A	A	P	P	P	P	P	P	209687_at	4.08466	3.57693	3.93352	6.88363	6.65634	6.66095	6.88775	6.99744	6.76902
203221_at	Hs.28935.0	7088	TLE1	transducin-like enhancer of split 1 (E(sp1) homolog, Drosophila)	Null: FDR p>0.05, |FC|<1.55 for ρ(0αKG)/ρ(0CTL)	2.831	7.11567	0	6.8e-05	2.636	6.21606	0	8.2e-05	-0.194	-1.14393	0.28843	0.693413	203221_at	P	P	P	P	P	P	P	P	P	203221_at	7.3348	7.6389	7.94776	10.397	10.376	10.64	10.1382	10.4372	10.2551
1554262_s_at	Hs2.348392.1	114818	KLHL29	kelch-like family member 29	Null: FDR p>0.05, |FC|<1.55 for ρ(0αKG)/ρ(0CTL)	2.824	7.08123	5e-05	0.003049	2.813	7.02744	5e-05	0.002118	-0.01	-1.00696	0.9797	0.996223	1554262_s_at	P	A	A	P	P	P	P	P	P	1554262_s_at	5.46363	4.9126	4.89234	7.63072	7.35768	8.75072	7.57384	7.58959	8.54513
237265_at	Hs.127567.0	254528	MEIOB	meiosis specific with OB domains	Null: FDR p>0.05, |FC|<1.55 for ρ(0αKG)/ρ(0CTL)	2.78	6.86852	0	5.6e-05	3.06	8.33973	0	2.6e-05	0.28	1.21419	0.11862	0.510464	237265_at	A	A	A	P	P	P	P	P	P	237265_at	4.25456	3.85426	4.24845	6.67553	7.03169	6.99063	7.00715	7.2059	7.32564
227617_at	Hs.22293.0	199953	TMEM201	transmembrane protein 201	Null: FDR p>0.05, |FC|<1.55 for ρ(0αKG)/ρ(0CTL)	2.739	6.67607	0.00541	0.047537	2.654	6.2941	0.00646	0.045	-0.085	-1.06069	0.91228	0.98027	227617_at	P	P	P	P	P	P	P	P	P	227617_at	7.97673	6.81181	7.40724	11.2279	11.1622	8.02405	9.8997	9.94784	10.311
210990_s_at	g1684836	3910	LAMA4	laminin, alpha 4	Null: FDR p>0.05, |FC|<1.55 for ρ(0αKG)/ρ(0CTL)	2.716	6.57049	0	0.000618	3.162	8.9507	0	0.000232	0.447	1.3632	0.12069	0.513908	210990_s_at	A	P	A	P	P	P	P	P	P	210990_s_at	7.122	7.19355	7.33754	10.1271	10.3287	9.34392	10.298	10.0922	10.7504
226690_at	Hs.4748.1	117	ADCYAP1R1	adenylate cyclase activating polypeptide 1 (pituitary) receptor type I	Null: FDR p>0.05, |FC|<1.55 for ρ(0αKG)/ρ(0CTL)	2.673	6.37754	1e-05	0.001493	2.171	4.50335	7e-05	0.002697	-0.502	-1.41618	0.14684	0.550995	226690_at	P	P	P	P	P	P	P	P	P	226690_at	6.11222	6.24954	5.6288	8.37102	8.31421	9.32454	8.57668	8.20236	7.72509
227984_at	Hs.6382.0	64788	LMF1	lipase maturation factor 1	Null: FDR p>0.05, |FC|<1.55 for ρ(0αKG)/ρ(0CTL)	2.67	6.36429	0	6.3e-05	2.558	5.88891	0	6.2e-05	-0.112	-1.08073	0.49871	0.825757	227984_at	A	A	A	P	P	P	P	P	P	227984_at	4.45728	4.4811	4.74143	7.14789	7.18852	7.3527	6.82015	7.20047	7.33363
223503_at	g12005818	81615	TMEM163	transmembrane protein 163	Null: FDR p>0.05, |FC|<1.55 for ρ(0αKG)/ρ(0CTL)	2.668	6.35548	1e-05	0.000997	2.823	7.07632	0	0.000563	0.156	1.11419	0.60222	0.871873	223503_at	P	P	P	P	P	P	P	P	P	223503_at	6.46076	6.95937	6.25143	9.6254	9.47949	8.5695	9.53586	9.15943	9.44644
238852_at	Hs.283549.0	5396	PRRX1	paired related homeobox 1	Null: FDR p>0.05, |FC|<1.55 for ρ(0αKG)/ρ(0CTL)	2.651	6.28102	0.0002	0.006768	2.231	4.69459	0.00067	0.010591	-0.42	-1.33793	0.36405	0.747966	238852_at	P	P	P	P	P	P	P	P	P	238852_at	7.24607	6.79618	8.36181	9.59634	9.78058	10.9811	9.79022	9.77786	9.52993
209160_at	g6624210	8644	AKR1C3	aldo-keto reductase family 1, member C3	Null: FDR p>0.05, |FC|<1.55 for ρ(0αKG)/ρ(0CTL)	2.644	6.25062	0	8.7e-05	2.596	6.04608	0	8.2e-05	-0.048	-1.03383	0.78302	0.940938	209160_at	P	P	P	P	P	P	P	P	P	209160_at	7.11121	7.81528	7.35272	10.0222	10.044	10.1463	10.0298	10.0405	9.99768
221701_s_at	g13560965	64220	STRA6	stimulated by retinoic acid 6	Null: FDR p>0.05, |FC|<1.55 for ρ(0αKG)/ρ(0CTL)	2.619	6.14324	2e-05	0.001593	2.842	7.17013	1e-05	0.000792	0.223	1.16716	0.49494	0.824033	221701_s_at	P	A	P	P	P	P	P	P	P	221701_s_at	6.12676	5.87003	6.26267	8.96118	9.26544	7.88856	8.74787	8.90167	9.13513
218468_s_at	g10863087	26585	GREM1	gremlin 1, DAN family BMP antagonist	Null: FDR p>0.05, |FC|<1.55 for ρ(0αKG)/ρ(0CTL)	2.601	6.06707	0.00049	0.011295	3.216	9.29207	0.0001	0.003329	0.614	1.5305	0.24124	0.654771	218468_s_at	P	P	P	P	P	P	P	P	P	218468_s_at	9.47615	9.30238	10.4022	12.9948	12.9202	11.0691	13.061	12.9235	12.843
1569872_a_at	Hs2.6382.2	64788	LMF1	lipase maturation factor 1	Null: FDR p>0.05, |FC|<1.55 for ρ(0αKG)/ρ(0CTL)	2.561	5.90117	0	0.000665	2.703	6.51155	0	0.00037	0.142	1.10343	0.58599	0.865637	1569872_a_at	A	A	A	P	P	P	P	P	P	1569872_a_at	5.0305	4.69296	5.62252	7.6955	7.54923	7.78453	7.49428	7.76059	8.19957
1552626_a_at	Hs2.331633.1	81615	TMEM163	transmembrane protein 163	Null: FDR p>0.05, |FC|<1.55 for ρ(0αKG)/ρ(0CTL)	2.516	5.71994	0	0.00063	2.612	6.11351	0	0.000371	0.096	1.06881	0.70016	0.912617	1552626_a_at	P	P	P	P	P	P	P	P	P	1552626_a_at	5.80827	5.82986	5.1717	8.43589	8.27772	7.64282	8.36042	8.08612	8.19937
203222_s_at	g4827027	7088	TLE1	transducin-like enhancer of split 1 (E(sp1) homolog, Drosophila)	Null: FDR p>0.05, |FC|<1.55 for ρ(0αKG)/ρ(0CTL)	2.511	5.70015	7e-05	0.003858	2.291	4.89395	0.00014	0.004024	-0.22	-1.16473	0.5612	0.854634	203222_s_at	P	P	P	P	P	P	P	P	P	203222_s_at	5.67415	7.43024	6.84742	9.03723	9.18313	9.26463	9.0096	8.79108	9.02531
220997_s_at	g13569894	81624	DIAPH3	diaphanous-related formin 3	Null: FDR p>0.05, |FC|<1.55 for ρ(0αKG)/ρ(0CTL)	2.506	5.68043	0.00075	0.014559	2.468	5.53276	0.00083	0.012058	-0.039	-1.0274	0.94004	0.986616	220997_s_at	A	A	A	P	A	P	P	P	P	220997_s_at	3.07569	4.30572	4.68833	6.61629	5.62985	7.34274	6.71077	6.76313	5.99855
228413_s_at	Hs.7306.1	6422	SFRP1	secreted frizzled-related protein 1	Null: FDR p>0.05, |FC|<1.55 for ρ(0αKG)/ρ(0CTL)	2.492	5.62557	0	0.00049	2.094	4.2693	1e-05	0.000701	-0.399	-1.31859	0.11052	0.498154	228413_s_at	P	P	P	P	P	P	P	P	P	228413_s_at	8.17598	7.62185	8.17213	10.6385	10.7987	10.0102	10.097	10.0112	10.1435
211709_s_at	g13543291	6320	CLEC11A	C-type lectin domain family 11, member A	Null: FDR p>0.05, |FC|<1.55 for ρ(0αKG)/ρ(0CTL)	2.486	5.60223	0	2.7e-05	2.299	4.92117	0	3.2e-05	-0.187	-1.13839	0.17716	0.589768	211709_s_at	P	P	P	P	P	P	P	P	P	211709_s_at	6.88157	7.09854	6.73198	9.39681	9.48863	9.28477	9.16818	9.16818	9.27416
202035_s_at	Hs.7306.0	6422	SFRP1	secreted frizzled-related protein 1	Null: FDR p>0.05, |FC|<1.55 for ρ(0αKG)/ρ(0CTL)	2.452	5.47174	0	0.000393	1.991	3.97512	1e-05	0.000677	-0.462	-1.37745	0.05715	0.382877	202035_s_at	A	A	A	P	P	P	P	P	P	202035_s_at	7.8975	7.69295	7.80161	10.441	10.5771	9.73072	9.67257	9.73072	9.9606
228284_at	Hs.28935.1	7088	TLE1	transducin-like enhancer of split 1 (E(sp1) homolog, Drosophila)	Null: FDR p>0.05, |FC|<1.55 for ρ(0αKG)/ρ(0CTL)	2.452	5.47174	0.00025	0.007717	2.046	4.12959	0.00088	0.01248	-0.406	-1.32501	0.35901	0.745023	228284_at	P	P	P	P	P	P	P	P	P	228284_at	5.37872	6.88586	6.69032	8.43043	8.34948	9.53067	8.29365	8.29029	8.50984
209699_x_at	g531159	1646	AKR1C2	aldo-keto reductase family 1, member C2	Null: FDR p>0.05, |FC|<1.55 for ρ(0αKG)/ρ(0CTL)	2.45	5.46416	1e-05	0.00135	2.827	7.09597	0	0.00052	0.377	1.29864	0.21437	0.629213	209699_x_at	A	A	A	P	P	A	P	P	P	209699_x_at	5.92289	5.99026	6.06483	8.56974	9.04765	7.71036	8.7394	8.78047	8.94007
229221_at	Hs.169610.2	960	CD44	CD44 molecule (Indian blood group)	Null: FDR p>0.05, |FC|<1.55 for ρ(0αKG)/ρ(0CTL)	2.441	5.43018	0.00168	0.023291	2.239	4.7207	0.00288	0.026747	-0.202	-1.15029	0.72316	0.921597	229221_at	P	P	P	P	P	P	P	P	P	229221_at	7.41	6.64634	7.3516	10.3795	10.3201	8.03122	9.51695	9.27911	9.32926
231867_at	Hs.173560.0	57451	TENM2	teneurin transmembrane protein 2	Null: FDR p>0.05, |FC|<1.55 for ρ(0αKG)/ρ(0CTL)	2.426	5.37401	0.00513	0.04598	2.235	4.70763	0.00807	0.051982	-0.191	-1.14155	0.77923	0.939617	231867_at	P	A	A	P	P	P	P	P	P	231867_at	8.15269	5.66212	6.07517	9.83026	9.45616	7.88103	8.72268	8.92438	8.94855
47550_at	4860464_RC	11178	LZTS1	leucine zipper, putative tumor suppressor 1	Null: FDR p>0.05, |FC|<1.55 for ρ(0αKG)/ρ(0CTL)	2.419	5.348	0.00024	0.007573	2.516	5.71994	0.00018	0.004609	0.097	1.06955	0.81928	0.952381	47550_at	P	P	P	P	P	P	P	P	P	47550_at	6.28537	5.70811	7.5504	9.09965	9.23244	8.46914	9.02841	8.87122	9.19231
203220_s_at	Hs.28935.0	7088	TLE1	transducin-like enhancer of split 1 (E(sp1) homolog, Drosophila)	Null: FDR p>0.05, |FC|<1.55 for ρ(0αKG)/ρ(0CTL)	2.415	5.33319	0	0.000323	2.14	4.40762	0	0.000377	-0.275	-1.20999	0.20201	0.616249	203220_s_at	P	P	P	P	P	P	P	P	P	203220_s_at	5.90077	6.30746	5.95052	8.10546	8.4198	8.87757	8.19806	8.10546	8.27469
226142_at	Hs.154762.2	11010	GLIPR1	GLI pathogenesis-related 1	Null: FDR p>0.05, |FC|<1.55 for ρ(0αKG)/ρ(0CTL)	2.411	5.31843	0.0028	0.031951	2.537	5.80381	0.00205	0.021491	0.126	1.09126	0.83604	0.958026	226142_at	P	P	P	P	P	P	P	P	P	226142_at	8.92672	8.1119	9.10034	11.9308	11.9518	9.48858	11.1746	11.209	11.3659
204948_s_at	g7242221	10468	FST	follistatin	Null: FDR p>0.05, |FC|<1.55 for ρ(0αKG)/ρ(0CTL)	2.395	5.25977	0.00577	0.049331	2.509	5.69225	0.00443	0.035397	0.114	1.08222	0.86798	0.967535	204948_s_at	P	P	P	P	P	P	P	P	P	204948_s_at	8.66732	6.92165	7.61141	11.0121	10.7975	8.57504	9.98792	9.8478	10.8902
204151_x_at	g5453542	1645	AKR1C1	aldo-keto reductase family 1, member C1	Null: FDR p>0.05, |FC|<1.55 for ρ(0αKG)/ρ(0CTL)	2.377	5.19455	2e-05	0.001767	2.763	6.78806	1e-05	0.000647	0.387	1.30767	0.21677	0.631786	204151_x_at	A	P	A	P	P	P	P	P	P	204151_x_at	6.22909	6.61588	6.24324	8.7301	9.42078	8.06705	9.1106	9.09068	9.17635
208240_s_at	g7019394	2246	FGF1	fibroblast growth factor 1 (acidic)	Null: FDR p>0.05, |FC|<1.55 for ρ(0αKG)/ρ(0CTL)	2.373	5.18017	0.0003	0.008636	2.577	5.96698	0.00017	0.004379	0.204	1.15189	0.6361	0.886987	208240_s_at	A	A	A	P	P	M	P	P	P	208240_s_at	5.54212	4.52281	4.96847	8.04392	7.6766	6.43058	7.63237	7.93092	7.20101
1555673_at	Hs2Affx.1.428	730755	KRTAP2-3	keratin associated protein 2-3	Null: FDR p>0.05, |FC|<1.55 for ρ(0αKG)/ρ(0CTL)	2.348	5.09118	0.00549	0.047922	2.062	4.17565	0.01104	0.063474	-0.286	-1.21926	0.66883	0.899746	1555673_at	M	P	A	P	P	P	P	P	P	1555673_at	5.11172	5.5903	3.74685	7.24967	8.43638	5.8059	6.61505	7.22201	6.7977
227550_at	Hs.94694.0	2674	GFRA1	GDNF family receptor alpha 1	Null: FDR p>0.05, |FC|<1.55 for ρ(0αKG)/ρ(0CTL)	2.346	5.08413	0	0.000746	2.248	4.75024	1e-05	0.000638	-0.098	-1.07029	0.68632	0.907735	227550_at	A	A	A	P	P	P	P	P	P	227550_at	5.32448	5.04008	4.55065	7.71284	7.25989	6.98042	7.13126	7.13126	7.39544
204222_s_at	g5803150	11010	GLIPR1	GLI pathogenesis-related 1	Null: FDR p>0.05, |FC|<1.55 for ρ(0αKG)/ρ(0CTL)	2.327	5.01761	0.00477	0.044095	2.858	7.2501	0.00135	0.016435	0.53	1.44393	0.41806	0.784137	204222_s_at	P	P	P	P	P	P	P	P	P	204222_s_at	8.80377	8.00928	9.18604	11.9068	11.7916	9.28267	11.4399	11.5341	11.5986
215870_s_at	Hs.290.1	5322	PLA2G5	phospholipase A2, group V	Null: FDR p>0.05, |FC|<1.55 for ρ(0αKG)/ρ(0CTL)	2.317	4.98295	0	0.00063	1.807	3.49914	2e-05	0.001273	-0.51	-1.42405	0.04847	0.3591	215870_s_at	P	A	A	P	P	P	M	P	P	215870_s_at	5.68866	5.02149	4.78397	7.65561	7.28157	7.50718	6.88499	6.90079	7.12985
204338_s_at	g11184227	5999	RGS4	regulator of G-protein signaling 4	Null: FDR p>0.05, |FC|<1.55 for ρ(0αKG)/ρ(0CTL)	2.316	4.9795	0	0.000712	1.813	3.51372	2e-05	0.001416	-0.503	-1.41716	0.05633	0.380812	204338_s_at	P	P	A	P	P	P	P	P	P	204338_s_at	6.25202	6.16607	5.91009	8.6676	8.76551	7.84321	7.95474	7.84321	7.97073
238717_at	Hs.44441.0	441528	LOC441528	zinc finger protein 839-like	Null: FDR p>0.05, |FC|<1.55 for ρ(0αKG)/ρ(0CTL)	2.315	4.97605	2e-05	0.001751	2.597	6.05027	1e-05	0.000736	0.282	1.21588	0.34364	0.735118	238717_at	A	M	M	P	P	P	P	P	P	238717_at	4.14301	4.7771	5.33596	7.38454	6.91395	6.90157	7.23906	7.21842	7.58974
237261_at	Hs.71832.0	285	ANGPT2	angiopoietin 2	Null: FDR p>0.05, |FC|<1.55 for ρ(0αKG)/ρ(0CTL)	2.296	4.91094	0.00511	0.045896	2.84	7.1602	0.0014	0.016784	0.544	1.45801	0.40625	0.776573	237261_at	P	P	P	P	P	P	P	P	P	237261_at	9.19624	8.1036	9.14894	12.0534	11.8666	9.41731	11.5841	11.5955	11.7894
202283_at	g4505708	5176	SERPINF1	serpin peptidase inhibitor, clade F (alpha-2 antiplasmin, pigment epithelium derived factor), member 1	Null: FDR p>0.05, |FC|<1.55 for ρ(0αKG)/ρ(0CTL)	2.282	4.86352	2e-05	0.00164	2.271	4.82658	2e-05	0.001185	-0.011	-1.00765	0.96874	0.99375	202283_at	P	P	P	P	P	P	P	P	P	202283_at	8.26551	7.66835	8.04787	10.6739	10.555	9.59974	10.3004	10.1499	10.345
1552766_at	Hs2.82302.2	90161	HS6ST2	heparan sulfate 6-O-sulfotransferase 2	Null: FDR p>0.05, |FC|<1.55 for ρ(0αKG)/ρ(0CTL)	2.27	4.82323	0	0.000795	2.591	6.02516	0	0.000312	0.321	1.2492	0.19998	0.614488	1552766_at	A	A	A	P	P	P	P	P	P	1552766_at	3.11879	3.26531	3.25963	5.9086	5.65238	4.89234	5.90117	5.66415	5.85205
236448_at	Hs.119486.0	90249	UNC5A	unc-5 netrin receptor A	Null: FDR p>0.05, |FC|<1.55 for ρ(0αKG)/ρ(0CTL)	2.246	4.74366	0	0.00038	1.973	3.92584	0	0.000449	-0.273	-1.20832	0.18886	0.603101	236448_at	P	P	P	P	P	P	P	P	P	236448_at	7.76633	7.18172	7.14954	9.49741	9.50213	9.8358	9.18198	9.31532	9.51892
229168_at	Hs.55407.0	91522	COL23A1	collagen, type XXIII, alpha 1	Null: FDR p>0.05, |FC|<1.55 for ρ(0αKG)/ρ(0CTL)	2.241	4.72725	1e-05	0.000949	2.65	6.27667	0	0.000315	0.409	1.32777	0.12058	0.513908	229168_at	A	A	A	P	P	P	P	P	P	229168_at	6.13935	5.53136	5.75905	7.98028	8.23729	7.93507	8.15953	8.24567	8.97336
220014_at	g7706193	51334	PRR16	proline rich 16	Null: FDR p>0.05, |FC|<1.55 for ρ(0αKG)/ρ(0CTL)	2.24	4.72397	3e-05	0.002353	2.469	5.5366	1e-05	0.001071	0.229	1.17202	0.45192	0.802524	220014_at	M	A	P	P	P	P	P	P	P	220014_at	3.76728	3.6561	3.97121	5.49054	5.99354	6.62958	6.12643	5.95693	6.7184
1553102_a_at	Hs2.209100.1	26112	CCDC69	coiled-coil domain containing 69	Null: FDR p>0.05, |FC|<1.55 for ρ(0αKG)/ρ(0CTL)	2.232	4.69785	0	0.000712	2.066	4.18724	1e-05	0.00069	-0.166	-1.12194	0.473	0.813025	1553102_a_at	A	P	A	P	P	P	P	P	P	1553102_a_at	5.09481	5.59142	5.02673	7.1972	7.29794	7.91339	7.47532	7.1972	7.23914
1554624_a_at	Hs2.194784.2	10326	SIRPB1	signal-regulatory protein beta 1	Null: FDR p>0.05, |FC|<1.55 for ρ(0αKG)/ρ(0CTL)	2.229	4.68809	0.0001	0.004632	1.736	3.3311	0.00061	0.009942	-0.492	-1.40639	0.17811	0.590735	1554624_a_at	P	P	A	P	P	P	P	P	P	1554624_a_at	4.38493	5.45489	3.95874	6.65727	7.17589	6.65115	6.27246	6.24757	6.48762
224065_at	g11493927	28996	HIPK2	homeodomain interacting protein kinase 2	Null: FDR p>0.05, |FC|<1.55 for ρ(0αKG)/ρ(0CTL)	2.227	4.68159	2e-05	0.001591	1.614	3.06099	0.00019	0.00481	-0.613	-1.52944	0.04729	0.356013	224065_at	P	P	A	P	P	P	P	P	P	224065_at	6.12772	6.66101	5.91557	8.02441	8.42772	8.93268	7.58758	7.87333	8.08612
223618_at	g9963854	56776	FMN2	formin 2	Null: FDR p>0.05, |FC|<1.55 for ρ(0αKG)/ρ(0CTL)	2.195	4.5789	0.0003	0.008609	1.873	3.66293	0.00091	0.012705	-0.323	-1.25093	0.42478	0.788334	223618_at	P	P	P	P	P	P	P	P	P	223618_at	7.73149	6.83433	7.33164	9.92315	10.0109	8.54979	9.239	9.39021	8.88676
1554163_at	Hs2.32366.2	117581	TWIST2	twist family bHLH transcription factor 2	Null: FDR p>0.05, |FC|<1.55 for ρ(0αKG)/ρ(0CTL)	2.186	4.55042	0.00031	0.008663	1.692	3.23104	0.00175	0.019482	-0.494	-1.40834	0.23179	0.646125	1554163_at	P	P	P	P	P	P	P	P	P	1554163_at	7.47826	6.9916	7.51574	10.0283	10.0628	8.45283	8.98114	8.97263	9.10786
226847_at	Hs.301570.0	10468	FST	follistatin	Null: FDR p>0.05, |FC|<1.55 for ρ(0αKG)/ρ(0CTL)	2.149	4.4352	0.00395	0.039296	2.179	4.5284	0.00364	0.031185	0.03	1.02101	0.95845	0.991286	226847_at	P	P	P	P	P	P	P	P	P	226847_at	10.6623	8.67111	10.039	12.5673	12.4624	10.7895	12.0365	11.9784	11.8941
220651_s_at	g8924142	55388	MCM10	minichromosome maintenance 10 replication initiation factor	Null: FDR p>0.05, |FC|<1.55 for ρ(0αKG)/ρ(0CTL)	2.148	4.43213	0.00279	0.031883	1.542	2.91198	0.01685	0.0832	-0.605	-1.52098	0.2801	0.686274	220651_s_at	P	P	P	P	P	P	P	P	P	220651_s_at	8.57526	7.01959	8.46499	10.7566	10.7062	9.04024	9.83653	9.62628	9.2242
203186_s_at	g9845514	6275	S100A4	S100 calcium binding protein A4	Null: FDR p>0.05, |FC|<1.55 for ρ(0αKG)/ρ(0CTL)	2.148	4.43213	0	0.000176	1.851	3.6075	0	0.000252	-0.297	-1.22859	0.08934	0.459661	203186_s_at	P	P	P	P	P	P	P	P	P	203186_s_at	6.96954	7.14605	7.49657	9.47297	9.34918	9.23509	8.97444	9.20504	8.98544
210261_at	g4101565	3776	KCNK2	potassium channel, two pore domain subfamily K, member 2	Null: FDR p>0.05, |FC|<1.55 for ρ(0αKG)/ρ(0CTL)	2.142	4.41373	0.0017	0.023438	2.104	4.299	0.0019	0.020508	-0.038	-1.02669	0.93911	0.986536	210261_at	A	P	A	P	P	P	P	P	P	210261_at	5.00125	5.13198	4.27788	7.70682	7.36703	5.76231	6.57526	6.6874	7.45918
205291_at	g4504664	3560	IL2RB	interleukin 2 receptor, beta	Null: FDR p>0.05, |FC|<1.55 for ρ(0αKG)/ρ(0CTL)	2.132	4.38325	8e-05	0.004173	1.966	3.90683	0.00015	0.004152	-0.165	-1.12117	0.6129	0.876721	205291_at	P	P	A	P	P	P	P	P	P	205291_at	5.73929	5.77437	5.04224	7.97763	7.97818	6.99464	7.33707	7.24663	7.87131
206120_at	g4502654	945	CD33	CD33 molecule	Null: FDR p>0.05, |FC|<1.55 for ρ(0αKG)/ρ(0CTL)	2.124	4.35901	1e-05	0.001242	1.783	3.44141	4e-05	0.001864	-0.341	-1.26663	0.18917	0.603487	206120_at	A	A	A	P	P	P	P	P	P	206120_at	5.23987	5.59097	4.77247	7.62566	7.45802	6.8931	6.8931	7.09505	6.96563
226136_at	Hs.154762.2	11010	GLIPR1	GLI pathogenesis-related 1	Null: FDR p>0.05, |FC|<1.55 for ρ(0αKG)/ρ(0CTL)	2.122	4.35297	0.00401	0.039595	2.265	4.80654	0.00271	0.025736	0.143	1.1042	0.80138	0.947329	226136_at	P	P	P	P	P	P	P	P	P	226136_at	8.03515	7.87723	8.18065	10.9717	10.9486	8.53899	10.1428	10.4003	10.3462
224762_at	Hs.8254.1	347735	SERINC2	serine incorporator 2	Null: FDR p>0.05, |FC|<1.55 for ρ(0αKG)/ρ(0CTL)	2.118	4.34092	2e-05	0.001846	1.869	3.65279	6e-05	0.002267	-0.249	-1.18838	0.36616	0.749257	224762_at	M	P	A	P	P	P	P	P	P	224762_at	6.56626	6.5159	5.82469	8.69675	8.67212	7.89329	8.12141	8.06135	8.33138
202291_s_at	g4505178	4256	MGP	matrix Gla protein	Null: FDR p>0.05, |FC|<1.55 for ρ(0αKG)/ρ(0CTL)	2.117	4.33791	0.0049	0.044784	2.402	5.28535	0.0023	0.023234	0.285	1.21841	0.6292	0.884733	202291_s_at	A	A	A	P	P	A	P	P	P	202291_s_at	4.4501	4.73471	5.33553	7.55249	7.85848	5.46005	7.2325	7.72137	6.77366
225626_at	Hs.266175.0	55824	PAG1	phosphoprotein membrane anchor with glycosphingolipid microdomains 1	Null: FDR p>0.05, |FC|<1.55 for ρ(0αKG)/ρ(0CTL)	2.113	4.3259	0.00049	0.011263	2.121	4.34995	0.00048	0.008432	0.009	1.00626	0.98328	0.997077	225626_at	P	P	P	P	P	P	P	P	P	225626_at	7.41947	8.40726	7.26338	10.1219	10.246	9.06087	10.2001	9.91518	9.33923
1554492_at	Hs2.436229.1	63892	THADA	thyroid adenoma associated	Null: FDR p>0.05, |FC|<1.55 for ρ(0αKG)/ρ(0CTL)	2.102	4.29304	0.00108	0.017995	1.585	3.00008	0.00608	0.043301	-0.518	-1.43197	0.27368	0.681624	1554492_at	P	P	A	P	P	P	P	P	P	1554492_at	5.07379	4.8723	3.73985	6.0723	6.32358	7.59754	5.98179	5.9849	6.47309
229158_at	Hs.105448.0	65266	WNK4	WNK lysine deficient protein kinase 4	Null: FDR p>0.05, |FC|<1.55 for ρ(0αKG)/ρ(0CTL)	2.099	4.28412	0.00033	0.009078	2.239	4.7207	0.00021	0.005078	0.139	1.10114	0.71834	0.919932	229158_at	P	P	P	P	P	P	P	P	P	229158_at	8.7619	7.45721	7.17477	10.1304	10.0494	9.51245	10.188	10.1401	9.78167
207345_at	g7242223	10468	FST	follistatin	Null: FDR p>0.05, |FC|<1.55 for ρ(0αKG)/ρ(0CTL)	2.073	4.20761	0.00405	0.039866	2.214	4.6396	0.00274	0.025894	0.141	1.10267	0.8008	0.947282	207345_at	P	P	P	P	P	P	P	P	P	207345_at	6.78059	5.5962	5.97215	8.87514	8.87563	6.81695	8.01584	8.25051	8.72332
242963_at	Hs.129379.0	166929	SGMS2	sphingomyelin synthase 2	Null: FDR p>0.05, |FC|<1.55 for ρ(0αKG)/ρ(0CTL)	2.058	4.16409	0.00216	0.027182	2.05	4.14106	0.00221	0.022632	-0.008	-1.00556	0.98715	0.997728	242963_at	P	P	A	P	P	P	P	P	P	242963_at	5.9529	5.86154	4.78607	8.02542	8.23063	6.51747	8.04787	7.11119	7.59039
222962_s_at	g11527601	55388	MCM10	minichromosome maintenance 10 replication initiation factor	Null: FDR p>0.05, |FC|<1.55 for ρ(0αKG)/ρ(0CTL)	2.053	4.14968	0.00268	0.0312	1.459	2.74918	0.01718	0.084189	-0.594	-1.50943	0.26572	0.675082	222962_s_at	P	P	P	P	P	P	P	P	P	222962_s_at	8.41945	6.74627	8.3378	10.255	10.4455	8.96056	9.54615	9.34244	8.99144
1555560_at	Hs2.22983.2	55757	UGGT2	UDP-glucose glycoprotein glucosyltransferase 2	Null: FDR p>0.05, |FC|<1.55 for ρ(0αKG)/ρ(0CTL)	2.041	4.11531	3e-05	0.002243	2.553	5.86853	0	0.000583	0.512	1.42603	0.08325	0.4465	1555560_at	P	P	A	P	P	P	P	P	P	1555560_at	3.41894	3.90666	4.04314	5.90209	6.2663	5.32362	6.30596	6.62444	6.09852
205572_at	g4557314	285	ANGPT2	angiopoietin 2	Null: FDR p>0.05, |FC|<1.55 for ρ(0αKG)/ρ(0CTL)	2.035	4.09823	0.00011	0.004836	2.156	4.45677	7e-05	0.002571	0.12	1.08673	0.70807	0.916258	205572_at	P	P	P	P	P	P	P	P	P	205572_at	11.5261	10.518	10.5891	13.2384	13.186	12.3151	12.9836	13.0299	13.0863
1553722_s_at	Hs2.243623.1	220441	RNF152	ring finger protein 152	Null: FDR p>0.05, |FC|<1.55 for ρ(0αKG)/ρ(0CTL)	2.026	4.07274	8e-05	0.004046	2.301	4.92799	3e-05	0.001542	0.274	1.20916	0.38005	0.759201	1553722_s_at	P	P	P	P	P	P	P	P	P	1553722_s_at	5.27648	4.20639	5.05284	7.0698	7.0897	6.45547	7.45449	7.10449	6.8789
1553639_a_at	Hs2.248652.1	133522	PPARGC1B	peroxisome proliferator-activated receptor gamma, coactivator 1 beta	Null: FDR p>0.05, |FC|<1.55 for ρ(0αKG)/ρ(0CTL)	2.024	4.0671	0.00024	0.007542	2.126	4.36506	0.00017	0.004357	0.103	1.074	0.77191	0.937297	1553639_a_at	P	P	P	P	P	P	P	P	P	1553639_a_at	7.17185	6.85282	6.57641	9.32227	9.37328	7.97647	9.14197	8.96841	8.87005
204288_s_at	g10947117	8470	SORBS2	sorbin and SH3 domain containing 2	Null: FDR p>0.05, |FC|<1.55 for ρ(0αKG)/ρ(0CTL)	2.018	4.05022	0.00309	0.033819	1.584	2.998	0.01187	0.066446	-0.435	-1.35191	0.41041	0.779359	204288_s_at	A	A	A	P	P	P	P	P	P	204288_s_at	5.19233	3.94708	5.53354	7.77239	7.07251	5.8831	6.60413	6.26327	6.55655
207060_at	g7710120	2020	EN2	engrailed homeobox 2	Null: FDR p>0.05, |FC|<1.55 for ρ(0αKG)/ρ(0CTL)	1.999	3.99723	1e-05	0.001197	1.562	2.95263	7e-05	0.002525	-0.436	-1.35285	0.08368	0.447371	207060_at	A	P	A	P	P	P	P	P	P	207060_at	4.761	5.69547	5.11892	7.04234	7.08566	7.44297	6.78665	6.81268	6.66326
232195_at	Hs.21896.0	57512	GPR158	G protein-coupled receptor 158	Null: FDR p>0.05, |FC|<1.55 for ρ(0αKG)/ρ(0CTL)	1.999	3.99723	0	0.000229	2.22	4.65893	0	0.000102	0.221	1.16554	0.18076	0.593614	232195_at	A	A	A	P	P	P	P	P	P	232195_at	4.37487	4.80628	4.71422	6.50989	6.64502	6.73829	6.77654	6.72918	7.05019
211653_x_at	g187444	1646	AKR1C2	aldo-keto reductase family 1, member C2	Null: FDR p>0.05, |FC|<1.55 for ρ(0αKG)/ρ(0CTL)	1.983	3.95314	0	3.3e-05	2.061	4.17275	0	2e-05	0.077	1.05482	0.47964	0.816838	211653_x_at	A	A	A	P	P	P	A	P	P	211653_x_at	6.13345	6.07519	5.9468	8.05488	8.05772	7.99326	8.16364	8.05755	8.11717
202037_s_at	g8400731	6422	SFRP1	secreted frizzled-related protein 1	Null: FDR p>0.05, |FC|<1.55 for ρ(0αKG)/ρ(0CTL)	1.983	3.95314	0	0.000303	1.826	3.54553	0	0.000305	-0.157	-1.11497	0.35796	0.743946	202037_s_at	P	P	P	P	P	P	P	P	P	202037_s_at	11.1405	10.8474	11.2767	13.1996	13.21	12.8053	12.998	12.9681	12.7779
223822_at	g13436145	55061	SUSD4	sushi domain containing 4	Null: FDR p>0.05, |FC|<1.55 for ρ(0αKG)/ρ(0CTL)	1.978	3.93947	0.00011	0.005031	1.509	2.84613	0.0008	0.011702	-0.468	-1.38319	0.15906	0.567158	223822_at	P	P	A	P	P	P	P	P	P	223822_at	6.03683	6.85701	5.45683	8.23852	7.87737	8.16793	7.52584	7.83464	7.51863
203411_s_at	g5031874	4000	LMNA	lamin A/C	Null: FDR p>0.05, |FC|<1.55 for ρ(0αKG)/ρ(0CTL)	1.976	3.93401	0	0.000286	1.476	2.78176	1e-05	0.000685	-0.5	-1.41421	0.01145	0.190894	203411_s_at	P	P	P	P	P	P	P	P	P	203411_s_at	7.83287	7.64064	7.59998	9.81359	9.83076	9.35587	9.18223	9.02506	9.29401
214079_at	Hs.152677.0	10202	DHRS2	dehydrogenase/reductase (SDR family) member 2	Null: FDR p>0.05, |FC|<1.55 for ρ(0αKG)/ρ(0CTL)	1.973	3.92584	0.00062	0.013081	2.401	5.28169	0.00015	0.004136	0.428	1.34537	0.29429	0.697908	214079_at	P	P	P	P	P	P	P	P	P	214079_at	5.22396	5.8345	4.1187	7.31598	7.19582	6.58534	7.48447	7.59736	7.29961
220489_s_at	g8923988	347735	SERINC2	serine incorporator 2	Null: FDR p>0.05, |FC|<1.55 for ρ(0αKG)/ρ(0CTL)	1.956	3.87985	1e-05	0.001471	1.701	3.25126	4e-05	0.001934	-0.255	-1.19334	0.29837	0.700664	220489_s_at	P	P	P	P	P	P	P	P	P	220489_s_at	8.40367	7.99313	7.81077	10.1815	10.3053	9.58784	10.0419	9.68019	9.58877
236034_at	Hs.68301.0	285	ANGPT2	angiopoietin 2	Null: FDR p>0.05, |FC|<1.55 for ρ(0αKG)/ρ(0CTL)	1.955	3.87716	0.00398	0.039456	2.271	4.82658	0.00158	0.018271	0.316	1.24487	0.5499	0.849643	236034_at	P	P	P	P	P	P	P	P	P	236034_at	9.45597	8.32868	9.45298	11.6856	11.6774	9.74041	11.3856	11.2918	11.3744
206448_at	g7662331	22891	ZNF365	zinc finger protein 365	Null: FDR p>0.05, |FC|<1.55 for ρ(0αKG)/ρ(0CTL)	1.943	3.84504	1e-05	0.000997	1.916	3.77375	1e-05	0.000758	-0.027	-1.01889	0.899	0.976041	206448_at	P	P	P	P	P	P	P	P	P	206448_at	6.43506	6.79481	7.2596	8.8722	8.90578	8.54148	8.57169	8.84597	8.81973
235272_at	Hs.135188.0	374897	SBSN	suprabasin	Null: FDR p>0.05, |FC|<1.55 for ρ(0αKG)/ρ(0CTL)	1.94	3.83706	1e-05	0.001317	1.541	2.90996	7e-05	0.002572	-0.399	-1.31859	0.10634	0.492102	235272_at	A	A	A	P	P	A	A	P	A	235272_at	5.33336	5.72139	6.09411	7.75394	7.94636	7.26843	7.20373	7.33041	7.23809
228181_at	Hs.55610.0	7779	SLC30A1	solute carrier family 30 (zinc transporter), member 1	Null: FDR p>0.05, |FC|<1.55 for ρ(0αKG)/ρ(0CTL)	1.94	3.83706	0.00447	0.042366	1.904	3.74249	0.00497	0.038097	-0.036	-1.02527	0.94622	0.987843	228181_at	P	P	P	P	P	P	P	P	P	228181_at	9.4093	8.96923	9.00059	11.8	11.8161	9.582	10.9635	10.9806	11.1469
210989_at	g1684836	3910	LAMA4	laminin, alpha 4	Null: FDR p>0.05, |FC|<1.55 for ρ(0αKG)/ρ(0CTL)	1.937	3.82909	0.00018	0.006425	1.767	3.40345	0.00035	0.007026	-0.17	-1.12506	0.60483	0.873462	210989_at	A	A	A	P	P	P	P	P	P	210989_at	3.75259	3.62954	4.62452	6.21885	5.52069	6.0785	5.52069	5.52069	6.2663
1569590_at	Hs2.383002.1	80005	DOCK5	dedicator of cytokinesis 5	Null: FDR p>0.05, |FC|<1.55 for ρ(0αKG)/ρ(0CTL)	1.931	3.81319	0.00332	0.035338	2.414	5.3295	0.0008	0.011717	0.482	1.39668	0.34846	0.738621	1569590_at	P	P	P	P	P	P	P	P	P	1569590_at	7.31563	6.73355	5.75905	9.23564	8.9216	7.44485	9.01685	9.08873	8.94371
210089_s_at	g13278992	3910	LAMA4	laminin, alpha 4	Null: FDR p>0.05, |FC|<1.55 for ρ(0αKG)/ρ(0CTL)	1.92	3.78423	0	0.000774	2	4	0	0.000449	0.08	1.05702	0.68969	0.909143	210089_s_at	A	A	A	P	P	A	P	M	P	210089_s_at	6.51387	6.71729	6.61136	8.63947	8.81081	8.15129	8.55907	8.3878	8.89574
1559796_at	Hs2.222486.1	253738	EBF3	early B-cell factor 3	Null: FDR p>0.05, |FC|<1.55 for ρ(0αKG)/ρ(0CTL)	1.918	3.77899	0.00028	0.008159	1.453	2.73777	0.00182	0.019921	-0.465	-1.38032	0.19629	0.61144	1559796_at	P	A	P	P	A	P	P	P	P	1559796_at	7.09774	6.0143	6.2467	8.22571	7.8967	8.99051	7.97266	8.07422	7.67216
1555471_a_at	Hs2.24889.2	56776	FMN2	formin 2	Null: FDR p>0.05, |FC|<1.55 for ρ(0αKG)/ρ(0CTL)	1.918	3.77899	0.00081	0.015165	1.546	2.92006	0.00321	0.028709	-0.371	-1.29325	0.3639	0.747909	1555471_a_at	P	P	P	P	P	P	P	P	P	1555471_a_at	6.58786	6.44585	6.02304	8.72862	8.75456	7.32666	8.09285	8.21407	7.38919
223794_at	g12053222	55130	ARMC4	armadillo repeat containing 4	Null: FDR p>0.05, |FC|<1.55 for ρ(0αKG)/ρ(0CTL)	1.916	3.77375	0.00018	0.006439	1.723	3.30122	0.00039	0.007488	-0.192	-1.14235	0.55526	0.851921	223794_at	P	P	P	P	P	P	P	P	P	223794_at	6.93694	6.37319	6.49151	8.11115	8.11115	9.32649	8.48021	8.29817	8.19336
225622_at	Hs.266175.0	55824	PAG1	phosphoprotein membrane anchor with glycosphingolipid microdomains 1	Null: FDR p>0.05, |FC|<1.55 for ρ(0αKG)/ρ(0CTL)	1.915	3.77114	0.00079	0.014979	2.231	4.69459	0.00027	0.005992	0.315	1.24401	0.43556	0.794554	225622_at	P	P	P	P	P	P	P	P	P	225622_at	6.57606	7.32466	6.46153	9.01541	9.19839	7.89452	9.53955	8.9033	8.61156
1556911_at	Hs2.340140.1	100874291	ALMS1-IT1	ALMS1 intronic transcript 1	Null: FDR p>0.05, |FC|<1.55 for ρ(0αKG)/ρ(0CTL)	1.91	3.75809	4e-05	0.002611	1.322	2.50012	0.00059	0.009722	-0.587	-1.50212	0.04719	0.355788	1556911_at	P	P	P	P	P	P	P	P	P	1556911_at	7.38536	7.28473	7.21111	9.08266	8.73572	9.79229	8.70602	8.84394	8.29856
33307_at	4866540_RC	27341	RRP7A	ribosomal RNA processing 7 homolog A	Null: FDR p>0.05, |FC|<1.55 for ρ(0αKG)/ρ(0CTL)	1.904	3.74249	1e-05	0.000866	1.538	2.90392	3e-05	0.001558	-0.366	-1.28877	0.09932	0.478905	33307_at	P	P	A	P	P	P	P	P	P	33307_at	8.00775	7.60701	7.68025	9.92164	9.85398	9.23102	9.16422	9.35106	9.39392
213556_at	Hs.22049.0	390940	PINLYP	phospholipase A2 inhibitor and LY6/PLAUR domain containing	Null: FDR p>0.05, |FC|<1.55 for ρ(0αKG)/ρ(0CTL)	1.9	3.73213	0.00016	0.006084	2.321	4.99678	4e-05	0.001719	0.421	1.33886	0.20369	0.618012	213556_at	A	P	P	P	P	P	P	P	P	213556_at	5.23027	5.75302	5.66528	7.91241	7.7797	6.65553	7.79638	8.0295	7.78576
231990_at	Hs.132288.0	9958	USP15	ubiquitin specific peptidase 15	Null: FDR p>0.05, |FC|<1.55 for ρ(0αKG)/ρ(0CTL)	1.9	3.73213	0.00012	0.005151	1.789	3.45575	0.00019	0.004706	-0.111	-1.07998	0.71558	0.918881	231990_at	P	P	P	P	P	P	P	P	P	231990_at	5.43807	6.32124	6.47031	7.69474	7.788	8.44693	7.65083	8.05873	7.8881
230925_at	Hs.122910.0	54518	APBB1IP	amyloid beta (A4) precursor protein-binding, family B, member 1 interacting protein	Null: FDR p>0.05, |FC|<1.55 for ρ(0αKG)/ρ(0CTL)	1.897	3.72438	0	0.000269	1.547	2.92209	0	0.000437	-0.35	-1.27456	0.04359	0.3453	230925_at	P	P	P	P	P	P	P	P	P	230925_at	9.18273	9.27126	8.98794	10.986	11.1511	10.996	10.9502	10.6656	10.4682
235518_at	Hs.144465.0	6546	SLC8A1	solute carrier family 8 (sodium/calcium exchanger), member 1	Null: FDR p>0.05, |FC|<1.55 for ρ(0αKG)/ρ(0CTL)	1.886	3.69609	0.0001	0.004731	1.83	3.55537	0.00013	0.003782	-0.056	-1.03958	0.84872	0.962074	235518_at	P	P	P	P	P	P	P	P	P	235518_at	6.15978	5.51087	5.06737	7.72469	7.66275	7.00848	7.39297	7.23948	7.59472
214535_s_at	Hs.120330.1	9509	ADAMTS2	ADAM metallopeptidase with thrombospondin type 1 motif 2	Null: FDR p>0.05, |FC|<1.55 for ρ(0αKG)/ρ(0CTL)	1.882	3.68586	1e-05	0.001065	1.844	3.59004	1e-05	0.000832	-0.037	-1.02598	0.86028	0.965424	214535_s_at	A	A	A	P	P	M	P	P	P	214535_s_at	6.26677	6.73312	6.58837	8.66829	8.3144	8.25059	8.28595	8.08387	8.75144
207151_at	g4501922	117	ADCYAP1R1	adenylate cyclase activating polypeptide 1 (pituitary) receptor type I	Null: FDR p>0.05, |FC|<1.55 for ρ(0αKG)/ρ(0CTL)	1.872	3.6604	0.00036	0.009484	1.747	3.3566	0.00058	0.009636	-0.125	-1.09051	0.71802	0.919932	207151_at	P	P	A	P	P	P	P	P	P	207151_at	5.81786	6.6636	5.30696	7.59721	7.51437	8.29278	7.91905	7.48846	7.62052
230493_at	Hs.128899.0	387914	SHISA2	shisa family member 2	Null: FDR p>0.05, |FC|<1.55 for ρ(0αKG)/ρ(0CTL)	1.868	3.65026	0	0.000542	1.624	3.08228	1e-05	0.000671	-0.244	-1.18427	0.19061	0.605352	230493_at	P	P	P	P	P	P	P	P	P	230493_at	8.68393	9.20775	8.68141	10.6568	10.8911	10.6298	10.3001	10.531	10.6142
228205_at	Hs.89643.1	7086	TKT	transketolase	Null: FDR p>0.05, |FC|<1.55 for ρ(0αKG)/ρ(0CTL)	1.868	3.65026	0.0001	0.004572	1.501	2.83039	0.00048	0.008486	-0.366	-1.28877	0.22586	0.640052	228205_at	P	P	P	P	P	P	P	P	P	228205_at	6.31549	6.71938	5.45592	7.82121	8.08966	8.18279	7.65713	7.52464	7.81312
213449_at	Hs.170114.0	10940	POP1	POP1 homolog, ribonuclease P/MRP subunit	Null: FDR p>0.05, |FC|<1.55 for ρ(0αKG)/ρ(0CTL)	1.867	3.64773	0.00099	0.01715	1.494	2.81669	0.00402	0.033256	-0.373	-1.29504	0.36335	0.747429	213449_at	P	P	P	P	P	P	P	P	P	213449_at	6.9692	6.94086	6.96241	9.29994	9.46822	7.70638	8.58838	8.40764	8.35912
211148_s_at	g8570646	285	ANGPT2	angiopoietin 2	Null: FDR p>0.05, |FC|<1.55 for ρ(0αKG)/ρ(0CTL)	1.866	3.64521	0.0004	0.010221	2.021	4.05865	0.00023	0.005326	0.155	1.11342	0.65957	0.89608	211148_s_at	P	P	P	P	P	P	P	P	P	211148_s_at	11.371	10.2752	10.4531	12.9482	12.8693	11.8792	12.707	12.5843	12.8716
229978_at	Hs.130661.0	729993	SHISA9	shisa family member 9	Null: FDR p>0.05, |FC|<1.55 for ρ(0αKG)/ρ(0CTL)	1.863	3.63763	0.00266	0.031	1.873	3.66293	0.00257	0.024941	0.01	1.00696	0.98227	0.996882	229978_at	A	A	A	P	P	P	P	P	P	229978_at	6.41108	5.96132	6.25575	8.92472	8.48001	6.81169	8.1241	7.9011	8.22229
203023_at	g7705450	51491	NOP16	NOP16 nucleolar protein	Null: FDR p>0.05, |FC|<1.55 for ρ(0αKG)/ρ(0CTL)	1.861	3.63259	0	0.000677	1.574	2.97729	1e-05	0.000985	-0.286	-1.21926	0.15204	0.558293	203023_at	P	P	P	P	P	P	P	P	P	203023_at	8.60191	8.33208	8.0785	10.3867	10.3597	9.84771	9.84771	9.93248	9.95512
219895_at	g8923642	55026	TMEM255A	transmembrane protein 255A	Null: FDR p>0.05, |FC|<1.55 for ρ(0αKG)/ρ(0CTL)	1.859	3.62756	0	0.000419	1.759	3.38463	0	0.00037	-0.1	-1.07177	0.55445	0.851619	219895_at	P	P	P	P	P	P	P	P	P	219895_at	5.29989	5.67413	5.32212	7.46538	7.39878	7.00943	7.30432	7.1961	7.07252
240294_at	Hs.155877.0	28996	HIPK2	homeodomain interacting protein kinase 2	Null: FDR p>0.05, |FC|<1.55 for ρ(0αKG)/ρ(0CTL)	1.844	3.59004	3e-05	0.002353	1.428	2.69073	0.00022	0.005261	-0.417	-1.33515	0.11697	0.508021	240294_at	P	P	P	P	P	P	P	P	P	240294_at	6.62768	6.85153	6.2568	8.09731	8.71127	8.45973	7.57767	8.28076	8.16028
232414_at	Hs.257300.0	55127	HEATR1	HEAT repeat containing 1	Null: FDR p>0.05, |FC|<1.55 for ρ(0αKG)/ρ(0CTL)	1.84	3.5801	0.00145	0.021325	2.277	4.84669	0.00034	0.006853	0.436	1.35285	0.3113	0.71105	232414_at	P	A	P	P	P	P	P	P	P	232414_at	4.85996	3.46523	4.56611	6.64996	5.88098	5.88098	6.64693	7.0942	5.98022
204469_at	g4506328	5803	PTPRZ1	protein tyrosine phosphatase, receptor-type, Z polypeptide 1	Null: FDR p>0.05, |FC|<1.55 for ρ(0αKG)/ρ(0CTL)	1.837	3.57266	0.00126	0.01963	2.127	4.36808	0.00047	0.008326	0.29	1.22264	0.48414	0.819005	204469_at	P	P	P	P	P	P	P	P	P	204469_at	7.16444	5.66212	6.36861	8.5502	8.67236	7.48406	8.53142	8.42893	8.61623
205749_at	g13325053	1543	CYP1A1	cytochrome P450, family 1, subfamily A, polypeptide 1	Null: FDR p>0.05, |FC|<1.55 for ρ(0αKG)/ρ(0CTL)	1.832	3.5603	5e-05	0.003002	1.517	2.86195	0.0002	0.004939	-0.315	-1.24401	0.24204	0.655346	205749_at	A	A	A	P	P	P	P	P	P	205749_at	6.20983	5.34816	5.20067	7.48336	7.57494	7.19719	7.29691	6.96719	7.04499
1567080_s_at	Hs2.403812.1	54982	CLN6	ceroid-lipofuscinosis, neuronal 6, late infantile, variant	Null: FDR p>0.05, |FC|<1.55 for ρ(0αKG)/ρ(0CTL)	1.831	3.55784	0.00203	0.026209	1.234	2.35218	0.01789	0.086552	-0.597	-1.51257	0.19521	0.610194	1567080_s_at	P	P	P	P	P	P	P	P	P	1567080_s_at	7.95609	6.48727	7.50638	9.67026	9.44081	8.33275	8.4423	8.88224	8.32729
216594_x_at	Hs.306098.1	1645	AKR1C1	aldo-keto reductase family 1, member C1	Null: FDR p>0.05, |FC|<1.55 for ρ(0αKG)/ρ(0CTL)	1.829	3.55291	0	0.000608	2.034	4.09539	0	0.000268	0.206	1.15349	0.26786	0.67648	216594_x_at	A	A	P	P	P	P	P	P	P	216594_x_at	6.14212	6.23646	6.28778	8.16571	8.34464	7.64202	8.27462	8.31123	8.18382
1554486_a_at	Hs2.334897.2	54438	GFOD1	glucose-fructose oxidoreductase domain containing 1	Null: FDR p>0.05, |FC|<1.55 for ρ(0αKG)/ρ(0CTL)	1.829	3.55291	0.00046	0.010908	1.266	2.40494	0.00488	0.03768	-0.564	-1.47836	0.13306	0.53127	1554486_a_at	P	P	P	P	P	P	P	P	P	1554486_a_at	3.59707	3.6339	4.20513	4.9192	6.23049	5.77431	4.78231	5.53726	4.91342
220264_s_at	g13470087	57720	GPR107	G protein-coupled receptor 107	Null: FDR p>0.05, |FC|<1.55 for ρ(0αKG)/ρ(0CTL)	1.826	3.54553	0.00016	0.00601	1.279	2.42671	0.00188	0.020335	-0.547	-1.46104	0.09644	0.474007	220264_s_at	P	P	P	P	P	P	P	P	P	220264_s_at	7.17654	6.53351	6.69848	9.30083	8.55693	8.02897	8.09452	8.12314	8.02897
1569323_at	Hs2.368849.1	5793	PTPRG	protein tyrosine phosphatase, receptor type, G	Null: FDR p>0.05, |FC|<1.55 for ρ(0αKG)/ρ(0CTL)	1.807	3.49914	0.00178	0.024102	1.794	3.46775	0.00187	0.020256	-0.014	-1.00975	0.97406	0.995005	1569323_at	P	P	P	P	P	P	P	P	P	1569323_at	3.53294	3.95338	5.45212	6.38319	6.05675	5.92039	6.1041	6.01737	6.19751
1553244_at	Hs2.277254.1	2187	FANCB	Fanconi anemia complementation group B	Null: FDR p>0.05, |FC|<1.55 for ρ(0αKG)/ρ(0CTL)	1.804	3.49187	0.00024	0.00755	1.809	3.50399	0.00023	0.005445	0.006	1.00417	0.98518	0.997291	1553244_at	P	P	P	P	P	P	P	P	P	1553244_at	5.18792	4.76686	6.18808	7.27877	7.19353	7.08123	7.38421	7.05694	7.12995
226695_at	Hs.9071.2	5396	PRRX1	paired related homeobox 1	Null: FDR p>0.05, |FC|<1.55 for ρ(0αKG)/ρ(0CTL)	1.803	3.48945	0	0.000393	1.814	3.51616	0	0.000268	0.012	1.00835	0.94239	0.987249	226695_at	P	P	P	P	P	P	P	P	P	226695_at	9.6466	10.0834	10.2436	11.7133	11.854	11.8144	11.8419	11.7843	11.7902
1558683_a_at	Hs2.196151.1	8091	HMGA2	high mobility group AT-hook 2	Null: FDR p>0.05, |FC|<1.55 for ρ(0αKG)/ρ(0CTL)	1.795	3.47015	5e-05	0.003233	1.866	3.64521	4e-05	0.001862	0.072	1.05117	0.78187	0.940494	1558683_a_at	P	P	P	P	P	P	P	P	P	1558683_a_at	5.27008	6.34228	5.90995	7.51234	7.90846	7.48536	7.5802	7.71126	7.82954
227276_at	Hs.33033.0	84898	PLXDC2	plexin domain containing 2	Null: FDR p>0.05, |FC|<1.55 for ρ(0αKG)/ρ(0CTL)	1.793	3.46535	0.00085	0.015651	1.729	3.31498	0.00109	0.014255	-0.064	-1.04536	0.86519	0.966759	227276_at	P	P	P	P	P	P	P	P	P	227276_at	6.09345	7.29896	7.82572	9.01318	8.88899	8.69505	8.63191	8.835	8.93861
1554158_at	Hs2.301449.2	10771	ZMYND11	zinc finger, MYND-type containing 11	Null: FDR p>0.05, |FC|<1.55 for ρ(0αKG)/ρ(0CTL)	1.793	3.46535	0	0.000248	1.397	2.63353	0	0.000496	-0.396	-1.31585	0.01889	0.240061	1554158_at	P	P	P	P	P	P	P	P	P	1554158_at	6.60306	6.9357	6.61822	8.55495	8.35255	8.62877	8.01866	8.23667	8.09328
205896_at	g4507002	6583	SLC22A4	solute carrier family 22 (organic cation/zwitterion transporter), member 4	Null: FDR p>0.05, |FC|<1.55 for ρ(0αKG)/ρ(0CTL)	1.792	3.46295	0.00057	0.012336	2.008	4.02224	0.00025	0.005719	0.216	1.16151	0.54526	0.847467	205896_at	P	P	P	P	P	P	P	P	P	205896_at	5.43535	5.6815	5.78416	7.96802	7.83513	6.47306	7.79638	7.53637	7.59243
229438_at	Hs.179769.0	56975	FAM20C	family with sequence similarity 20, member C	Null: FDR p>0.05, |FC|<1.55 for ρ(0αKG)/ρ(0CTL)	1.787	3.45097	0.001	0.017266	2.025	4.06992	0.00043	0.007903	0.238	1.17936	0.53992	0.844956	229438_at	A	A	A	P	P	P	A	P	P	229438_at	8.27892	7.52234	6.59204	9.3682	9.32161	9.06541	9.13735	9.45653	9.87542
212886_at	Hs.209100.0	26112	CCDC69	coiled-coil domain containing 69	Null: FDR p>0.05, |FC|<1.55 for ρ(0αKG)/ρ(0CTL)	1.782	3.43903	2e-05	0.001862	1.68	3.20428	3e-05	0.001665	-0.102	-1.07326	0.65535	0.89433	212886_at	A	A	A	P	P	P	A	P	A	212886_at	5.84651	5.89402	6.35314	7.51212	7.65134	8.27583	7.54323	7.75389	7.83654
234859_at	Hs.272319.0	91584	PLXNA4	plexin A4	Null: FDR p>0.05, |FC|<1.55 for ρ(0αKG)/ρ(0CTL)	1.779	3.43188	0	0.000519	1.315	2.48802	2e-05	0.00128	-0.464	-1.37936	0.01908	0.24088	234859_at	A	A	A	P	P	P	M	P	P	234859_at	5.7218	5.69964	5.2108	7.3558	7.46203	7.15207	6.83812	6.96242	6.77658
203666_at	g10834987	6387	CXCL12	chemokine (C-X-C motif) ligand 12	Null: FDR p>0.05, |FC|<1.55 for ρ(0αKG)/ρ(0CTL)	1.777	3.42713	7e-05	0.00383	1.65	3.13834	0.00013	0.00372	-0.127	-1.09202	0.63303	0.885907	203666_at	A	A	A	P	P	P	P	A	P	203666_at	4.84308	5.42239	4.68317	7.22535	6.65355	6.40076	6.87859	6.41528	6.60441
201287_s_at	g4506858	6382	SDC1	syndecan 1	Null: FDR p>0.05, |FC|<1.55 for ρ(0αKG)/ρ(0CTL)	1.774	3.42001	0.00086	0.015755	1.923	3.79211	0.0005	0.008703	0.149	1.1088	0.69081	0.909436	201287_s_at	P	P	P	P	P	P	P	P	P	201287_s_at	9.98829	8.41102	8.98317	11.1971	11.039	10.4691	10.949	10.9248	11.2784
1563614_at	Hs2.368757.1	27085	MTBP	MDM2 binding protein	Null: FDR p>0.05, |FC|<1.55 for ρ(0αKG)/ρ(0CTL)	1.773	3.41764	0.00016	0.00605	1.645	3.12748	0.00028	0.00611	-0.128	-1.09278	0.66582	0.898618	1563614_at	P	P	P	P	P	P	P	P	P	1563614_at	6.24818	5.38541	5.41411	7.76459	7.63203	6.96887	7.17561	7.62976	7.17656
223821_s_at	g13436145	55061	SUSD4	sushi domain containing 4	Null: FDR p>0.05, |FC|<1.55 for ρ(0αKG)/ρ(0CTL)	1.772	3.41527	0.00161	0.022762	1.437	2.70757	0.00568	0.04146	-0.335	-1.26138	0.42204	0.786422	223821_s_at	P	P	P	P	P	P	P	P	P	223821_s_at	6.32917	7.20693	5.3761	8.14444	7.65417	8.43013	7.79638	7.61485	7.81292
216870_x_at	Hs.43628.1	8847	DLEU2	deleted in lymphocytic leukemia 2 (non-protein coding)	Null: FDR p>0.05, |FC|<1.55 for ρ(0αKG)/ρ(0CTL)	1.77	3.41054	0.00041	0.010369	1.839	3.57762	0.00031	0.006503	0.069	1.04899	0.83646	0.958156	216870_x_at	P	P	P	P	P	P	P	P	P	216870_x_at	7.2199	6.8462	6.59386	9.29274	8.76698	7.91143	8.8639	8.88	8.4344
218593_at	g8922387	55131	RBM28	RNA binding motif protein 28	Null: FDR p>0.05, |FC|<1.55 for ρ(0αKG)/ρ(0CTL)	1.768	3.40581	1e-05	0.000959	1.958	3.88523	0	0.000437	0.19	1.14076	0.33884	0.731983	218593_at	P	P	P	P	P	P	P	P	P	218593_at	9.1	9.10082	8.97977	11.0142	11.0832	10.387	11.0055	11.1857	10.8645
219615_s_at	g4504850	8645	KCNK5	potassium channel, two pore domain subfamily K, member 5	Null: FDR p>0.05, |FC|<1.55 for ρ(0αKG)/ρ(0CTL)	1.762	3.39168	0.00103	0.017532	1.607	3.04618	0.00188	0.020335	-0.155	-1.11342	0.68534	0.907206	219615_s_at	M	A	A	P	P	A	P	P	P	219615_s_at	6.30436	5.50951	6.05011	8.3199	8.06083	6.76778	7.57384	7.50509	7.60517
243010_at	Hs.103512.0	124540	MSI2	musashi RNA binding protein 2	Null: FDR p>0.05, |FC|<1.55 for ρ(0αKG)/ρ(0CTL)	1.76	3.38698	9e-05	0.004349	1.516	2.85997	0.00027	0.005971	-0.244	-1.18427	0.37658	0.756581	243010_at	P	P	P	P	P	P	P	P	P	243010_at	6.98767	6.31529	7.03297	8.27805	8.57687	8.76055	7.9505	8.16236	8.77039
228692_at	Hs.169943.0	80243	PREX2	phosphatidylinositol-3,4,5-trisphosphate-dependent Rac exchange factor 2	Null: FDR p>0.05, |FC|<1.55 for ρ(0αKG)/ρ(0CTL)	1.76	3.38698	0.0001	0.004637	1.516	2.85997	0.0003	0.0063	-0.243	-1.18345	0.3848	0.762146	228692_at	P	P	P	P	P	P	P	P	P	228692_at	5.55175	4.75311	4.90897	6.64379	6.93513	6.91377	6.90384	6.79685	6.06259
241620_at	Hs.171895.0	23347	SMCHD1	structural maintenance of chromosomes flexible hinge domain containing 1	Null: FDR p>0.05, |FC|<1.55 for ρ(0αKG)/ρ(0CTL)	1.756	3.3776	1e-05	0.001414	1.135	2.19619	0.00037	0.007226	-0.621	-1.53794	0.01438	0.211865	241620_at	M	A	P	P	P	P	P	P	P	241620_at	4.48243	4.28694	4.65811	6.56093	6.37621	5.75759	5.56797	5.53798	5.72686
206326_at	g4504158	2922	GRP	gastrin-releasing peptide	Null: FDR p>0.05, |FC|<1.55 for ρ(0αKG)/ρ(0CTL)	1.752	3.36825	0	0.000822	1.406	2.65001	3e-05	0.001517	-0.346	-1.27103	0.08801	0.457305	206326_at	A	A	A	P	P	P	P	P	P	206326_at	4.03669	3.67334	3.87709	6.0139	5.45686	5.37245	5.34624	5.22898	5.22898
214011_s_at	Hs.279918.1	51491	NOP16	NOP16 nucleolar protein	Null: FDR p>0.05, |FC|<1.55 for ρ(0αKG)/ρ(0CTL)	1.737	3.33341	1e-05	0.001272	1.498	2.82451	3e-05	0.0017	-0.24	-1.18099	0.25681	0.667045	214011_s_at	P	P	P	P	P	P	P	P	P	214011_s_at	9.99487	9.87247	9.59569	11.778	11.7886	11.1078	11.2171	11.3485	11.3902
212667_at	Hs.111779.1	6678	SPARC	secreted protein, acidic, cysteine-rich (osteonectin)	Null: FDR p>0.05, |FC|<1.55 for ρ(0αKG)/ρ(0CTL)	1.735	3.32879	0.00011	0.00496	1.665	3.17114	0.00015	0.00414	-0.07	-1.04972	0.79782	0.946175	212667_at	P	P	P	P	P	P	P	P	P	212667_at	10.4579	9.67694	9.74898	11.9747	11.9718	11.1424	11.6497	11.622	11.6062
217523_at	Hs.285173.0	960	CD44	CD44 molecule (Indian blood group)	Null: FDR p>0.05, |FC|<1.55 for ρ(0αKG)/ρ(0CTL)	1.733	3.32418	0.00082	0.015298	2.005	4.01389	0.0003	0.006277	0.272	1.20748	0.45976	0.806229	217523_at	P	P	P	P	P	P	P	P	P	217523_at	6.63364	6.14544	6.44935	8.86665	8.34093	7.22103	8.36171	8.46921	8.41221
201105_at	g6006015	3956	LGALS1	lectin, galactoside-binding, soluble, 1	Null: FDR p>0.05, |FC|<1.55 for ρ(0αKG)/ρ(0CTL)	1.733	3.32418	0.00012	0.0052	1.246	2.37183	0.00125	0.015591	-0.486	-1.40056	0.10439	0.488299	201105_at	P	P	P	P	P	P	P	P	P	201105_at	11.4974	11.3553	10.5359	12.6293	12.7279	13.2297	12.1143	12.463	12.5506
1557582_at	Hs2.432486.1	55909	BIN3	bridging integrator 3	Null: FDR p>0.05, |FC|<1.55 for ρ(0αKG)/ρ(0CTL)	1.731	3.31958	5e-05	0.003147	1.928	3.80527	2e-05	0.001333	0.197	1.14631	0.43475	0.79399	1557582_at	P	A	A	P	P	P	P	P	P	1557582_at	4.99911	4.66436	4.91983	7.02853	6.37263	6.37621	6.33737	6.96751	7.06287
223854_at	g4406582	56126	PCDHB10	protocadherin beta 10	Null: FDR p>0.05, |FC|<1.55 for ρ(0αKG)/ρ(0CTL)	1.729	3.31498	7e-05	0.003885	1.546	2.92006	0.00017	0.004428	-0.183	-1.13524	0.48488	0.819397	223854_at	P	P	P	P	P	P	P	P	P	223854_at	3.74895	4.39078	4.73189	6.35314	5.99116	5.71396	5.71396	5.8957	5.8998
1564129_a_at	Hs2.274858.1	23475	QPRT	quinolinate phosphoribosyltransferase	Null: FDR p>0.05, |FC|<1.55 for ρ(0αKG)/ρ(0CTL)	1.718	3.2898	0.00044	0.010661	1.135	2.19619	0.00608	0.043297	-0.583	-1.49796	0.10003	0.479848	1564129_a_at	P	A	P	P	P	P	P	P	P	1564129_a_at	7.49668	6.92317	6.84381	8.59947	8.23599	9.58313	8.2987	8.23599	8.13406
1554155_at	Hs2.23782.2	79648	MCPH1	microcephalin 1	Null: FDR p>0.05, |FC|<1.55 for ρ(0αKG)/ρ(0CTL)	1.71	3.27161	0.00022	0.007204	1.237	2.35708	0.00199	0.021129	-0.473	-1.38799	0.134	0.532972	1554155_at	P	P	P	P	P	P	P	P	P	1554155_at	7.0503	7.68181	7.9794	9.36163	9.44401	9.03558	9.11179	9.04557	8.26426
221994_at	Hs.154103.2	10611	PDLIM5	PDZ and LIM domain 5	Null: FDR p>0.05, |FC|<1.55 for ρ(0αKG)/ρ(0CTL)	1.706	3.26255	2e-05	0.001767	1.224	2.33593	0.00024	0.005613	-0.482	-1.39668	0.04638	0.35338	221994_at	P	P	P	P	P	P	P	P	P	221994_at	8.08382	7.56031	7.39702	9.32207	9.70083	9.13649	8.80659	8.8356	9.07028
219071_x_at	g13124772	51236	HGH1	HGH1 homolog	Null: FDR p>0.05, |FC|<1.55 for ρ(0αKG)/ρ(0CTL)	1.702	3.25352	0	0.000505	1.38	2.60268	1e-05	0.000841	-0.322	-1.25006	0.06732	0.409943	219071_x_at	P	P	P	P	P	P	P	P	P	219071_x_at	7.00943	7.27503	7.26756	8.9719	8.9721	8.71396	8.39787	8.46158	8.83244
205696_s_at	g4885268	2674	GFRA1	GDNF family receptor alpha 1	Null: FDR p>0.05, |FC|<1.55 for ρ(0αKG)/ρ(0CTL)	1.697	3.24226	1e-05	0.000964	1.732	3.32188	1e-05	0.000638	0.035	1.02456	0.85138	0.962991	205696_s_at	A	A	A	P	P	P	P	P	P	205696_s_at	3.82397	4.09915	4.24249	5.85535	6.01233	5.3878	5.726	5.73091	5.90367
218774_at	g7661733	28960	DCPS	decapping enzyme, scavenger	Null: FDR p>0.05, |FC|<1.55 for ρ(0αKG)/ρ(0CTL)	1.691	3.2288	0.0002	0.006925	1.22	2.32947	0.0019	0.020503	-0.471	-1.38607	0.12884	0.525717	218774_at	P	P	P	P	P	P	P	P	P	218774_at	7.65579	7.65641	6.96893	8.81767	8.83225	9.70304	8.49836	8.52061	8.9222
238638_at	Hs.148515.0	219855	SLC37A2	solute carrier family 37 (glucose-6-phosphate transporter), member 2	Null: FDR p>0.05, |FC|<1.55 for ρ(0αKG)/ρ(0CTL)	1.687	3.21986	0.00013	0.005337	1.395	2.62989	0.00051	0.008836	-0.292	-1.22434	0.29717	0.699914	238638_at	P	A	M	P	P	P	P	P	P	238638_at	7.03545	6.73221	6.64959	8.99345	8.63952	7.84391	8.1008	8.14089	8.3591
203180_at	g4502040	220	ALDH1A3	aldehyde dehydrogenase 1 family, member A3	Null: FDR p>0.05, |FC|<1.55 for ρ(0αKG)/ρ(0CTL)	1.685	3.2154	1e-05	0.001414	1.931	3.81319	0	0.000561	0.245	1.18509	0.24458	0.656884	203180_at	P	P	P	P	P	P	P	P	P	203180_at	10.0177	10.3772	10.8582	12.101	11.9693	12.239	12.4008	12.3659	12.2784
211055_s_at	g13623522	27130	INVS	inversin	Null: FDR p>0.05, |FC|<1.55 for ρ(0αKG)/ρ(0CTL)	1.684	3.21318	4e-05	0.002635	1.096	2.13761	0.00092	0.012745	-0.589	-1.5042	0.02854	0.286545	211055_s_at	A	A	A	P	P	P	P	P	P	211055_s_at	4.30229	4.49061	4.65729	6.20665	6.57177	5.72427	5.44079	5.8838	5.41228
218161_s_at	g8923531	54982	CLN6	ceroid-lipofuscinosis, neuronal 6, late infantile, variant	Null: FDR p>0.05, |FC|<1.55 for ρ(0αKG)/ρ(0CTL)	1.682	3.20872	0.00124	0.019499	1.343	2.53678	0.00497	0.038115	-0.34	-1.26576	0.37394	0.754476	218161_s_at	A	A	P	P	P	P	P	P	P	218161_s_at	7.75958	6.99336	7.5773	9.72855	9.44538	8.20334	8.69183	8.86321	8.80285
232596_at	Hs.122164.0	81624	DIAPH3	diaphanous-related formin 3	Null: FDR p>0.05, |FC|<1.55 for ρ(0αKG)/ρ(0CTL)	1.678	3.19984	1e-05	0.000964	1.564	2.95672	1e-05	0.000948	-0.115	-1.08298	0.53982	0.844856	232596_at	P	P	P	P	P	P	P	P	P	232596_at	8.13567	7.55473	7.88034	9.31766	9.63048	9.6572	9.62698	9.37975	9.25496
209121_x_at	g179023	7026	NR2F2	nuclear receptor subfamily 2, group F, member 2	Null: FDR p>0.05, |FC|<1.55 for ρ(0αKG)/ρ(0CTL)	1.677	3.19762	0.00089	0.016	1.141	2.20534	0.00908	0.056074	-0.537	-1.45095	0.15364	0.561143	209121_x_at	P	P	P	P	P	P	P	P	P	209121_x_at	8.92541	8.79714	9.35808	11.1484	11.1788	9.78579	10.061	10.1289	10.3131
223601_at	g4406678	93145	OLFM2	olfactomedin 2	Null: FDR p>0.05, |FC|<1.55 for ρ(0αKG)/ρ(0CTL)	1.672	3.18656	0	0.000321	2.282	4.86352	0	5.5e-05	0.61	1.52626	0.00167	0.076614	223601_at	P	P	P	P	P	P	P	P	P	223601_at	6.1717	6.37514	6.62271	8.06188	8.06188	8.06188	8.6976	8.53573	8.78183
219148_at	g8923876	55872	PBK	PDZ binding kinase	Null: FDR p>0.05, |FC|<1.55 for ρ(0αKG)/ρ(0CTL)	1.672	3.18656	5e-05	0.003192	1.197	2.29262	0.00062	0.010107	-0.475	-1.38992	0.07233	0.422566	219148_at	P	P	P	P	P	P	P	P	P	219148_at	9.71812	9.29541	9.81516	11.0391	11.0265	11.778	11.0024	10.8275	10.59
209990_s_at	g3719225	9568	GABBR2	gamma-aminobutyric acid (GABA) B receptor, 2	Null: FDR p>0.05, |FC|<1.55 for ρ(0αKG)/ρ(0CTL)	1.669	3.17994	0.0005	0.011349	1.218	2.32624	0.0038	0.032012	-0.451	-1.36699	0.1857	0.599111	209990_s_at	P	P	P	P	P	P	P	P	P	209990_s_at	7.9992	7.99076	9.02643	10.1665	10.3941	9.4632	9.41837	9.62969	9.62306
236297_at	Hs.126036.0	84898	PLXDC2	plexin domain containing 2	Null: FDR p>0.05, |FC|<1.55 for ρ(0αKG)/ρ(0CTL)	1.666	3.17334	0.00103	0.017506	1.522	2.87189	0.00185	0.020161	-0.144	-1.10496	0.6904	0.909362	236297_at	A	P	P	P	P	P	P	P	P	236297_at	3.84645	4.53302	5.36208	6.55428	5.93357	6.252	5.93357	5.92832	6.44646
200793_s_at	g4501866	50	ACO2	aconitase 2, mitochondrial	Null: FDR p>0.05, |FC|<1.55 for ρ(0αKG)/ρ(0CTL)	1.665	3.17114	0	0.000815	1.381	2.60449	2e-05	0.001303	-0.284	-1.21757	0.13284	0.531042	200793_s_at	P	P	P	P	P	P	P	P	P	200793_s_at	8.48695	8.71567	8.69795	10.4009	10.5672	9.92691	9.92691	9.98905	10.1278
211624_s_at	g181431	1813	DRD2	dopamine receptor D2	Null: FDR p>0.05, |FC|<1.55 for ρ(0αKG)/ρ(0CTL)	1.665	3.17114	0	0.000713	1.955	3.87716	0	0.000252	0.291	1.22349	0.11203	0.500426	211624_s_at	A	A	A	P	P	P	P	P	P	211624_s_at	6.65824	6.21889	6.54398	8.10659	8.35424	7.95402	8.3657	8.29825	8.62317
230448_at	Hs.104767.0	124565	SLC38A10	solute carrier family 38, member 10	Null: FDR p>0.05, |FC|<1.55 for ρ(0αKG)/ρ(0CTL)	1.662	3.16455	0.0003	0.008634	1.707	3.26481	0.00025	0.005693	0.046	1.0324	0.87882	0.970947	230448_at	P	A	P	P	P	P	P	P	P	230448_at	6.63142	6.3833	6.98745	8.70149	8.66	7.6256	8.31346	8.18913	8.62204
202036_s_at	g2415416	6422	SFRP1	secreted frizzled-related protein 1	Null: FDR p>0.05, |FC|<1.55 for ρ(0αKG)/ρ(0CTL)	1.656	3.15142	0	0.000725	1.451	2.73397	1e-05	0.0009	-0.205	-1.15269	0.2462	0.658095	202036_s_at	P	P	P	P	P	P	P	P	P	202036_s_at	11.7462	11.2938	11.4274	13.3288	13.2139	12.8928	13.0878	12.8928	12.841
202937_x_at	Hs.239934.0	27341	RRP7A	ribosomal RNA processing 7 homolog A	Null: FDR p>0.05, |FC|<1.55 for ρ(0αKG)/ρ(0CTL)	1.653	3.14487	1e-05	0.001262	1.188	2.27837	0.00014	0.003938	-0.465	-1.38032	0.03524	0.314329	202937_x_at	A	A	A	A	A	P	A	A	A	202937_x_at	7.1152	6.69552	7.05808	8.85544	8.74373	8.22802	8.04787	8.11878	8.26519
218804_at	g8922319	55107	ANO1	anoctamin 1, calcium activated chloride channel	Null: FDR p>0.05, |FC|<1.55 for ρ(0αKG)/ρ(0CTL)	1.65	3.13834	0.00102	0.017325	1.851	3.6075	0.00046	0.00828	0.202	1.15029	0.574	0.860509	218804_at	A	A	M	P	P	P	A	P	P	218804_at	5.45486	4.84384	5.37245	7.13126	7.50372	5.9859	7.15397	7.00216	7.06928
206632_s_at	g4758159	9582	APOBEC3B	apolipoprotein B mRNA editing enzyme, catalytic polypeptide-like 3B	Null: FDR p>0.05, |FC|<1.55 for ρ(0αKG)/ρ(0CTL)	1.647	3.13182	0.00051	0.011638	1.101	2.14503	0.00645	0.044998	-0.545	-1.45902	0.11455	0.503909	206632_s_at	P	P	P	P	P	P	P	P	P	206632_s_at	10.1964	8.91712	8.98949	10.9391	10.8866	11.2169	10.6571	10.5132	10.2363
220283_at	g13376071	79802	HHIPL2	HHIP-like 2	Null: FDR p>0.05, |FC|<1.55 for ρ(0αKG)/ρ(0CTL)	1.645	3.12748	0.0038	0.038428	1.644	3.12531	0.00382	0.032146	-0.001	-1.00069	0.99731	0.999425	220283_at	A	A	A	M	A	A	A	A	A	220283_at	6.66429	6.66024	8.16521	9.30371	8.94145	8.18085	8.69084	8.61623	9.11452
1554699_at	Hs2.95111.1	91133	L3MBTL4	l(3)mbt-like 4 (Drosophila)	Null: FDR p>0.05, |FC|<1.55 for ρ(0αKG)/ρ(0CTL)	1.643	3.12315	0.0028	0.031926	1.55	2.92817	0.00397	0.032997	-0.093	-1.06659	0.82221	0.953529	1554699_at	A	A	P	P	P	P	P	P	P	1554699_at	2.91074	3.16668	4.12094	4.92929	4.41082	5.78833	4.60406	4.89326	5.35119
232760_at	Hs.272315.0	56154	TEX15	testis expressed 15	Null: FDR p>0.05, |FC|<1.55 for ρ(0αKG)/ρ(0CTL)	1.633	3.10157	5e-05	0.003135	1.334	2.52101	0.00024	0.005487	-0.299	-1.23029	0.2203	0.635627	232760_at	P	P	P	P	P	P	P	P	P	232760_at	7.0474	7.24342	7.84916	9.01595	9.23008	8.79352	8.99855	8.61573	8.52903
222705_s_at	g12803730	10166	SLC25A15	solute carrier family 25 (mitochondrial carrier; ornithine transporter) member 15	Null: FDR p>0.05, |FC|<1.55 for ρ(0αKG)/ρ(0CTL)	1.632	3.09942	1e-05	0.000997	1.129	2.18707	0.00013	0.00375	-0.503	-1.41716	0.01903	0.240685	222705_s_at	P	P	P	P	P	P	P	P	P	222705_s_at	6.56404	6.6121	6.18548	7.86365	8.14899	8.24562	7.47007	7.85033	7.42808
210495_x_at	g11493493	2335	FN1	fibronectin 1	Null: FDR p>0.05, |FC|<1.55 for ρ(0αKG)/ρ(0CTL)	1.626	3.08656	5e-05	0.003189	1.981	3.94767	1e-05	0.000931	0.356	1.27987	0.15102	0.557187	210495_x_at	P	P	P	P	P	P	P	P	P	210495_x_at	11.8639	11.9625	11.8003	13.8185	13.7827	12.9023	13.8586	13.7648	13.947
208233_at	g7019416	10630	PDPN	podoplanin	Null: FDR p>0.05, |FC|<1.55 for ρ(0αKG)/ρ(0CTL)	1.624	3.08228	0.00016	0.005999	1.891	3.70892	5e-05	0.002108	0.267	1.2033	0.33319	0.72827	208233_at	P	A	P	P	P	P	P	P	P	208233_at	3.94908	3.82084	4.65729	5.51019	5.5578	6.23035	6.19715	6.06899	5.8346
203324_s_at	g4557412	858	CAV2	caveolin 2	Null: FDR p>0.05, |FC|<1.55 for ρ(0αKG)/ρ(0CTL)	1.621	3.07588	0	0.000144	2.047	4.13246	0	3.2e-05	0.426	1.3435	0.0046	0.125612	203324_s_at	P	P	P	P	P	P	P	P	P	203324_s_at	8.7553	8.85781	8.86117	10.6146	10.3357	10.3882	10.8787	10.8557	10.8809
213712_at	Hs.30504.0	54898	ELOVL2	ELOVL fatty acid elongase 2	Null: FDR p>0.05, |FC|<1.55 for ρ(0αKG)/ρ(0CTL)	1.618	3.06949	7e-05	0.00372	1.804	3.49187	3e-05	0.001543	0.186	1.13761	0.44583	0.799802	213712_at	P	P	P	P	P	P	P	P	P	213712_at	6.72177	6.13281	6.95901	8.5396	8.16475	7.96425	8.62235	8.36332	8.24038
221062_at	g5174466	9953	HS3ST3B1	heparan sulfate (glucosamine) 3-O-sulfotransferase 3B1	Null: FDR p>0.05, |FC|<1.55 for ρ(0αKG)/ρ(0CTL)	1.618	3.06949	0.00129	0.019782	1.95	3.86375	0.00036	0.007123	0.332	1.25876	0.36961	0.75182	221062_at	P	P	P	P	P	P	P	P	P	221062_at	7.38901	8.12503	7.3018	9.67541	9.62743	8.36765	9.68096	9.44963	9.53486
212089_at	Hs.77886.2	4000	LMNA	lamin A/C	Null: FDR p>0.05, |FC|<1.55 for ρ(0αKG)/ρ(0CTL)	1.615	3.06312	0	0.000302	1.131	2.1901	1e-05	0.000979	-0.484	-1.39862	0.005	0.131625	212089_at	P	P	P	P	P	P	P	P	P	212089_at	11.0517	10.6065	10.9051	12.4715	12.5219	12.416	12.0011	11.9783	11.9783
213427_at	Hs.115823.0	10799	RPP40	ribonuclease P/MRP 40kDa subunit	Null: FDR p>0.05, |FC|<1.55 for ρ(0αKG)/ρ(0CTL)	1.612	3.05675	1e-05	0.001338	1.354	2.5562	5e-05	0.002033	-0.258	-1.19582	0.19716	0.612452	213427_at	P	P	P	P	P	P	P	P	P	213427_at	6.78587	6.60897	7.19391	8.4489	8.64073	8.33603	8.08258	8.49161	8.0764
224325_at	g13623798	8325	FZD8	frizzled class receptor 8	Null: FDR p>0.05, |FC|<1.55 for ρ(0αKG)/ρ(0CTL)	1.609	3.0504	0.00368	0.037603	2.105	4.30198	0.00066	0.010448	0.496	1.4103	0.26047	0.670468	224325_at	P	P	P	P	P	P	P	P	P	224325_at	8.11182	8.69084	9.00647	10.6803	10.7934	9.1627	10.4978	10.6749	10.953
202668_at	Hs.30942.0	1948	EFNB2	ephrin-B2	Null: FDR p>0.05, |FC|<1.55 for ρ(0αKG)/ρ(0CTL)	1.607	3.04618	0.00022	0.007238	2.218	4.65248	2e-05	0.001218	0.611	1.52732	0.05032	0.364393	202668_at	P	P	P	P	P	P	P	P	P	202668_at	10.254	11.0937	10.5208	12.5041	12.5238	11.6627	12.9241	12.7908	12.8089
235178_x_at	Hs.265592.0	157570	ESCO2	establishment of sister chromatid cohesion N-acetyltransferase 2	Null: FDR p>0.05, |FC|<1.55 for ρ(0αKG)/ρ(0CTL)	1.606	3.04407	0.0005	0.011356	0.994	1.9917	0.00951	0.057684	-0.612	-1.52838	0.07414	0.426198	235178_x_at	P	P	P	P	P	P	P	P	P	235178_x_at	7.13015	6.35784	7.57534	8.67976	8.89538	8.30673	8.31878	7.9992	7.72845
221963_x_at	Hs.87409.1	100293516	ZNF587B	zinc finger protein 587B	Null: FDR p>0.05, |FC|<1.55 for ρ(0αKG)/ρ(0CTL)	1.604	3.03985	0.00095	0.016768	0.986	1.98069	0.01588	0.080056	-0.618	-1.53475	0.09636	0.473815	221963_x_at	P	P	P	P	P	P	P	P	P	221963_x_at	9.04972	9.15394	8.90805	11.1795	11.0332	9.71013	9.91285	10.135	10.0223
207084_at	g5031982	5454	POU3F2	POU class 3 homeobox 2	Null: FDR p>0.05, |FC|<1.55 for ρ(0αKG)/ρ(0CTL)	1.602	3.03564	7e-05	0.003687	1.763	3.39403	3e-05	0.001628	0.161	1.11806	0.50294	0.827747	207084_at	P	P	P	P	P	P	P	P	P	207084_at	6.20518	6.6516	7.05695	8.23195	8.53308	7.95594	8.49485	8.19786	8.51053
227609_at	Hs.180669.2	94240	EPSTI1	epithelial stromal interaction 1 (breast)	Null: FDR p>0.05, |FC|<1.55 for ρ(0αKG)/ρ(0CTL)	1.601	3.03354	0.00036	0.00959	1.657	3.1536	0.00028	0.006127	0.056	1.03958	0.85042	0.962844	227609_at	A	A	A	P	P	P	P	P	P	227609_at	4.98245	4.63818	5.18308	6.33737	7.21932	6.05108	6.5112	6.85206	6.41266
205493_s_at	g11321616	10570	DPYSL4	dihydropyrimidinase-like 4	Null: FDR p>0.05, |FC|<1.55 for ρ(0αKG)/ρ(0CTL)	1.597	3.02514	2e-05	0.002088	1.712	3.27615	1e-05	0.001069	0.115	1.08298	0.5819	0.863625	205493_s_at	P	P	P	P	P	P	P	P	P	205493_s_at	7.00247	7.33627	6.75512	8.75293	8.90445	8.22739	8.68516	8.77276	8.77327
216442_x_at	Hs.287820.2	2335	FN1	fibronectin 1	Null: FDR p>0.05, |FC|<1.55 for ρ(0αKG)/ρ(0CTL)	1.595	3.02095	4e-05	0.002488	1.963	3.89872	1e-05	0.000701	0.367	1.28967	0.1157	0.505877	216442_x_at	P	P	P	P	P	P	P	P	P	216442_x_at	11.7746	11.8607	11.7872	13.7251	13.6331	12.8503	13.7836	13.6937	13.8334
241708_at	Hs.309770.0	1793	DOCK1	dedicator of cytokinesis 1	Null: FDR p>0.05, |FC|<1.55 for ρ(0αKG)/ρ(0CTL)	1.588	3.00632	0.00025	0.007767	1.137	2.19923	0.00241	0.023973	-0.452	-1.36794	0.13166	0.529653	241708_at	P	P	P	P	P	P	P	P	P	241708_at	7.25536	7.33766	6.36307	8.47414	8.263	8.98332	8.17061	8.17764	8.01754
222113_s_at	Hs.147176.1	58513	EPS15L1	epidermal growth factor receptor pathway substrate 15-like 1	Null: FDR p>0.05, |FC|<1.55 for ρ(0αKG)/ρ(0CTL)	1.584	2.998	0.00031	0.008637	1.513	2.85403	0.00042	0.007869	-0.071	-1.05044	0.8039	0.948168	222113_s_at	P	P	P	P	P	P	P	P	P	222113_s_at	5.21645	6.16157	6.17131	7.01182	7.58565	7.70439	7.51379	7.20513	7.36901
235436_at	Hs.133082.0	64794	DDX31	DEAD (Asp-Glu-Ala-Asp) box polypeptide 31	Null: FDR p>0.05, |FC|<1.55 for ρ(0αKG)/ρ(0CTL)	1.58	2.9897	0.00344	0.036027	1.5	2.82843	0.00468	0.036666	-0.08	-1.05702	0.84564	0.96122	235436_at	P	P	P	P	P	P	P	P	P	235436_at	6.96699	6.80048	7.8873	9.29496	9.21881	7.88161	8.93098	8.72909	8.49402
219737_s_at	Hs.12450.0	5101	PCDH9	protocadherin 9	Null: FDR p>0.05, |FC|<1.55 for ρ(0αKG)/ρ(0CTL)	1.58	2.9897	0.00014	0.00555	1.082	2.11697	0.00191	0.020567	-0.497	-1.41128	0.07783	0.434878	219737_s_at	P	P	A	P	P	P	P	P	P	219737_s_at	5.86705	5.94941	5.44493	7.42787	7.80214	6.77063	6.77063	6.77063	6.96736
210367_s_at	g2415307	9536	PTGES	prostaglandin E synthase	Null: FDR p>0.05, |FC|<1.55 for ρ(0αKG)/ρ(0CTL)	1.579	2.98763	0	0.000623	1.445	2.72263	1e-05	0.000642	-0.134	-1.09733	0.4004	0.773235	210367_s_at	P	A	M	P	P	P	P	P	P	210367_s_at	7.11056	6.63053	6.69237	8.46097	8.40822	8.30232	8.1427	8.21428	8.41224
221448_s_at	g13775173	56154	TEX15	testis expressed 15	Null: FDR p>0.05, |FC|<1.55 for ρ(0αKG)/ρ(0CTL)	1.578	2.98556	2e-05	0.001827	1.137	2.19923	0.00025	0.005677	-0.441	-1.35754	0.04979	0.362744	221448_s_at	P	P	P	P	P	P	P	P	P	221448_s_at	5.42639	5.54879	5.8831	7.00159	7.52647	7.06527	6.88413	6.90201	6.48445
219037_at	g7705619	51018	RRP15	ribosomal RNA processing 15 homolog	Null: FDR p>0.05, |FC|<1.55 for ρ(0αKG)/ρ(0CTL)	1.576	2.98142	0.00012	0.005108	1.638	3.11234	9e-05	0.002974	0.062	1.04391	0.80542	0.948594	219037_at	P	P	P	P	P	P	P	P	P	219037_at	9.39786	9.52065	9.69914	11.4766	11.3762	10.4921	11.1731	11.3251	11.0321
1558915_a_at	Hs2.211939.1	5195	PEX14	peroxisomal biogenesis factor 14	Null: FDR p>0.05, |FC|<1.55 for ρ(0αKG)/ρ(0CTL)	1.574	2.97729	7e-05	0.003661	1.445	2.72263	0.00013	0.003747	-0.128	-1.09278	0.58336	0.864325	1558915_a_at	A	P	P	P	P	P	P	P	P	1558915_a_at	6.40133	6.30438	6.91519	8.47381	8.18279	7.68535	8.01657	7.85144	8.08877
228176_at	Hs.55902.0	1903	S1PR3	sphingosine-1-phosphate receptor 3	Null: FDR p>0.05, |FC|<1.55 for ρ(0αKG)/ρ(0CTL)	1.571	2.97111	0.00488	0.044647	1.512	2.85205	0.00605	0.043181	-0.059	-1.04174	0.89307	0.974959	228176_at	P	P	P	P	P	P	P	P	P	228176_at	8.03387	7.43542	7.92035	9.98408	9.91107	8.20631	9.38873	9.10437	9.43271
223278_at	g4481752	2706	GJB2	gap junction protein beta 2	Null: FDR p>0.05, |FC|<1.55 for ρ(0αKG)/ρ(0CTL)	1.567	2.96288	2e-05	0.001767	1.592	3.01467	2e-05	0.001162	0.025	1.01748	0.89942	0.97627	223278_at	P	P	P	P	P	P	P	P	P	223278_at	10.4823	9.85672	10.1779	11.8876	11.8636	11.4662	11.9713	11.6748	11.6461
218408_at	g6912707	26519	TIMM10	translocase of inner mitochondrial membrane 10 homolog (yeast)	Null: FDR p>0.05, |FC|<1.55 for ρ(0αKG)/ρ(0CTL)	1.564	2.95672	2e-05	0.001591	0.942	1.92119	0.00072	0.011048	-0.622	-1.53901	0.00893	0.171255	218408_at	P	P	P	P	P	P	P	P	P	218408_at	9.05971	8.60359	8.51383	10.3463	10.3241	10.1979	9.36023	9.71151	9.92993
212473_s_at	Hs.198793.0	9645	MICAL2	microtubule associated monooxygenase, calponin and LIM domain containing 2	Null: FDR p>0.05, |FC|<1.55 for ρ(0αKG)/ρ(0CTL)	1.561	2.95058	0.00023	0.007483	1.983	3.95314	4e-05	0.001781	0.422	1.33978	0.14503	0.548516	212473_s_at	P	P	P	P	P	P	P	P	P	212473_s_at	9.87533	10.0454	10.7174	11.8748	12.1424	11.3046	12.0259	12.2001	12.3624
214432_at	Hs.274371.0	478	ATP1A3	ATPase, Na+/K+ transporting, alpha 3 polypeptide	Null: FDR p>0.05, |FC|<1.55 for ρ(0αKG)/ρ(0CTL)	1.558	2.94445	4e-05	0.002606	1.417	2.6703	8e-05	0.002823	-0.141	-1.10267	0.51604	0.834277	214432_at	P	P	P	P	P	P	P	P	P	214432_at	6.11126	6.50118	6.68424	8.06233	8.23002	7.67753	7.70192	7.70192	8.14351
227971_at	Hs.30643.0	203447	NRK	Nik related kinase	Null: FDR p>0.05, |FC|<1.55 for ρ(0αKG)/ρ(0CTL)	1.553	2.93427	0.00053	0.011864	1.866	3.64521	0.00014	0.003957	0.314	1.24315	0.31568	0.715146	227971_at	P	A	A	P	P	P	P	P	P	227971_at	4.61064	3.26557	4.06638	5.58223	5.50373	5.5142	5.66528	6.14182	5.73483
224634_at	Hs.6880.2	54865	GPATCH4	G-patch domain containing 4	Null: FDR p>0.05, |FC|<1.55 for ρ(0αKG)/ρ(0CTL)	1.552	2.93223	0.00014	0.005596	1.365	2.57576	0.00036	0.007182	-0.187	-1.13839	0.46702	0.810075	224634_at	P	P	P	P	P	P	P	P	P	224634_at	9.29254	9.3496	9.38066	11.1081	11.3391	10.2303	10.7573	10.6618	10.6975
242116_x_at	Hs.240722.0	26057	ANKRD17	ankyrin repeat domain 17	Null: FDR p>0.05, |FC|<1.55 for ρ(0αKG)/ρ(0CTL)	1.544	2.91602	0	0.000334	1.072	2.10235	2e-05	0.001152	-0.472	-1.38703	0.00527	0.134828	242116_x_at	P	P	P	P	P	P	P	P	P	242116_x_at	5.94309	5.83791	5.80154	7.23565	7.51899	7.45918	7.08291	6.93636	6.77966
205542_at	g9558758	26872	STEAP1	six transmembrane epithelial antigen of the prostate 1	Null: FDR p>0.05, |FC|<1.55 for ρ(0αKG)/ρ(0CTL)	1.544	2.91602	0.00131	0.019913	1.887	3.69865	0.00033	0.00674	0.343	1.26839	0.33375	0.728859	205542_at	P	P	P	P	P	P	P	P	P	205542_at	9.58131	9.90154	10.7171	11.9559	11.9379	10.9371	11.9658	12.0648	11.829
204462_s_at	g5730044	6567	SLC16A2	solute carrier family 16, member 2 (thyroid hormone transporter)	Null: FDR p>0.05, |FC|<1.55 for ρ(0αKG)/ρ(0CTL)	1.543	2.914	0.00331	0.03522	2.02	4.05584	0.00058	0.009647	0.476	1.39088	0.25245	0.663142	204462_s_at	P	P	P	P	P	P	P	P	P	204462_s_at	8.42436	8.47463	9.57719	10.7061	10.8622	9.53789	10.7848	10.7889	10.9611
210783_x_at	g2257694	6320	CLEC11A	C-type lectin domain family 11, member A	Null: FDR p>0.05, |FC|<1.55 for ρ(0αKG)/ρ(0CTL)	1.542	2.91198	1e-05	0.00135	1.44	2.71321	2e-05	0.001277	-0.102	-1.07326	0.57952	0.862673	210783_x_at	A	A	A	A	P	M	A	A	P	210783_x_at	6.0945	6.40458	6.71496	7.83059	8.0917	7.91788	7.78605	7.68388	8.06305
243708_at	Hs.186566.0	124842	TMEM132E	transmembrane protein 132E	Null: FDR p>0.05, |FC|<1.55 for ρ(0αKG)/ρ(0CTL)	1.54	2.90795	0.0001	0.004514	1.705	3.26029	4e-05	0.001953	0.165	1.12117	0.49434	0.823719	243708_at	A	A	A	P	P	P	P	P	P	243708_at	6.81543	6.73674	6.81329	8.46957	8.34498	8.17033	8.01673	8.40801	9.05491
213905_x_at	Hs.821.1	633	BGN	biglycan	Null: FDR p>0.05, |FC|<1.55 for ρ(0αKG)/ρ(0CTL)	1.537	2.9019	0.00026	0.007945	1.452	2.73587	0.0004	0.007561	-0.085	-1.06069	0.75497	0.931437	213905_x_at	P	P	P	P	P	P	P	P	P	213905_x_at	10.1339	9.36874	9.85101	11.5315	11.6678	10.7663	11.1403	11.1474	11.4219
228778_at	Hs.48419.0	79648	MCPH1	microcephalin 1	Null: FDR p>0.05, |FC|<1.55 for ρ(0αKG)/ρ(0CTL)	1.537	2.9019	0	0.00041	1.069	2.09798	2e-05	0.001348	-0.468	-1.38319	0.00682	0.150911	228778_at	P	P	P	P	P	P	P	P	P	228778_at	7.83143	7.59419	7.75493	9.39154	9.10192	9.29822	8.9486	8.79461	8.64577
228082_at	Hs.135121.0	79827	CLMP	CXADR-like membrane protein	Null: FDR p>0.05, |FC|<1.55 for ρ(0αKG)/ρ(0CTL)	1.535	2.89788	0	0.00068	1.906	3.74769	0	0.000196	0.37	1.29235	0.03682	0.321483	228082_at	P	P	P	P	P	P	P	P	P	228082_at	10.9652	10.5677	11.0145	12.5632	12.3654	12.2251	12.7835	12.6851	12.7956
205991_s_at	g12707578	5396	PRRX1	paired related homeobox 1	Null: FDR p>0.05, |FC|<1.55 for ρ(0αKG)/ρ(0CTL)	1.53	2.88786	0	0.000382	1.612	3.05675	0	0.000214	0.082	1.05848	0.5463	0.847788	205991_s_at	P	P	P	P	P	P	P	P	P	205991_s_at	9.80144	9.90668	10.0589	11.3374	11.3443	11.6742	11.5063	11.5332	11.5629
232181_at	Hs.159475.0	133522	PPARGC1B	peroxisome proliferator-activated receptor gamma, coactivator 1 beta	Null: FDR p>0.05, |FC|<1.55 for ρ(0αKG)/ρ(0CTL)	1.528	2.88386	0.0006	0.012789	1.427	2.68887	0.00095	0.013048	-0.101	-1.07252	0.7412	0.92746	232181_at	P	P	P	P	P	P	P	P	P	232181_at	10.1693	9.4889	9.80392	11.4869	11.8845	10.6748	11.3376	11.3649	11.0412
212563_at	Hs.30736.0	23246	BOP1	block of proliferation 1	Null: FDR p>0.05, |FC|<1.55 for ρ(0αKG)/ρ(0CTL)	1.527	2.88186	0	0.000727	1.518	2.86394	0	0.000529	-0.009	-1.00626	0.95185	0.989115	212563_at	P	P	P	P	P	P	P	P	P	212563_at	8.79529	8.38854	8.32342	10.1229	10.0441	9.922	9.95867	9.91967	10.1822
217884_at	g13399321	55226	NAT10	N-acetyltransferase 10 (GCN5-related)	Null: FDR p>0.05, |FC|<1.55 for ρ(0αKG)/ρ(0CTL)	1.527	2.88186	0.00054	0.012023	1.315	2.48802	0.00148	0.017454	-0.211	-1.15749	0.48689	0.820167	217884_at	P	P	P	P	P	P	P	P	P	217884_at	9.20748	8.88724	8.71118	10.8693	10.8229	9.694	10.3252	10.2093	10.2177
241866_at	Hs.170504.0	9194	SLC16A7	solute carrier family 16 (monocarboxylate transporter), member 7	Null: FDR p>0.05, |FC|<1.55 for ρ(0αKG)/ρ(0CTL)	1.526	2.87986	7e-05	0.003835	1.634	3.10372	4e-05	0.001899	0.108	1.07773	0.63541	0.886818	241866_at	P	P	P	P	P	P	P	P	P	241866_at	7.27893	6.78803	7.42601	8.86629	8.88503	8.31972	9.01173	8.82927	8.55536
213206_at	Hs.100651.2	9570	GOSR2	golgi SNAP receptor complex member 2	Null: FDR p>0.05, |FC|<1.55 for ρ(0αKG)/ρ(0CTL)	1.521	2.8699	0.0038	0.038432	1.778	3.4295	0.00145	0.017205	0.257	1.19499	0.52922	0.840099	213206_at	P	P	P	P	P	P	P	P	P	213206_at	7.37345	7.63972	9.00132	9.57822	9.94832	9.05103	9.66441	9.86773	9.81678
221266_s_at	g13540564	81501	DCSTAMP	dendrocyte expressed seven transmembrane protein	Null: FDR p>0.05, |FC|<1.55 for ρ(0αKG)/ρ(0CTL)	1.519	2.86592	0.00017	0.00613	1.154	2.2253	0.00115	0.014779	-0.365	-1.28788	0.17243	0.584176	221266_s_at	A	A	A	P	P	P	P	P	P	221266_s_at	4.50022	5.20347	4.38328	6.33847	6.50202	5.80241	5.828	5.98293	5.73761
215498_s_at	Hs.180533.2	5606	MAP2K3	mitogen-activated protein kinase kinase 3	Null: FDR p>0.05, |FC|<1.55 for ρ(0αKG)/ρ(0CTL)	1.516	2.85997	0.00133	0.020173	1.349	2.54735	0.00278	0.026171	-0.167	-1.12272	0.62641	0.883568	215498_s_at	A	A	A	P	P	A	M	A	P	215498_s_at	10.0874	9.63674	8.99716	11.5009	11.348	10.4199	10.7759	10.869	11.1237
1554415_at	Hs2.26782.2	27097	TAF5L	TAF5-like RNA polymerase II, p300/CBP-associated factor (PCAF)-associated factor, 65kDa	Null: FDR p>0.05, |FC|<1.55 for ρ(0αKG)/ρ(0CTL)	1.516	2.85997	2e-05	0.00158	1.157	2.22993	0.00013	0.003792	-0.36	-1.28343	0.07865	0.43696	1554415_at	P	P	P	P	P	P	P	P	P	1554415_at	6.79953	6.65131	6.3684	7.97752	8.07819	8.31168	7.50829	7.7062	8.07428
209693_at	g6502572	23245	ASTN2	astrotactin 2	Null: FDR p>0.05, |FC|<1.55 for ρ(0αKG)/ρ(0CTL)	1.515	2.85799	0.00127	0.019703	1.807	3.49914	0.00038	0.007367	0.293	1.22519	0.39597	0.770459	209693_at	P	P	P	P	P	P	P	P	P	209693_at	5.96505	7.07724	6.63009	8.17961	8.36819	7.66914	7.98472	8.22197	8.8878
219985_at	g5174464	9955	HS3ST3A1	heparan sulfate (glucosamine) 3-O-sulfotransferase 3A1	Null: FDR p>0.05, |FC|<1.55 for ρ(0αKG)/ρ(0CTL)	1.514	2.85601	0.00012	0.005247	1.876	3.67056	2e-05	0.001362	0.362	1.28521	0.15877	0.566976	219985_at	P	P	P	P	P	P	P	P	P	219985_at	8.37421	9.45344	8.78838	10.4485	10.4555	10.2531	10.6935	10.748	10.8024
213139_at	Hs.93005.0	6591	SNAI2	snail family zinc finger 2	Null: FDR p>0.05, |FC|<1.55 for ρ(0αKG)/ρ(0CTL)	1.511	2.85008	0.00042	0.010503	2.118	4.34092	3e-05	0.001665	0.607	1.52309	0.05709	0.382697	213139_at	P	P	P	P	P	P	P	P	P	213139_at	9.66085	9.35268	10.3231	11.1281	10.9633	11.7777	11.9515	12.0322	11.7072
205290_s_at	g4557368	650	BMP2	bone morphogenetic protein 2	Null: FDR p>0.05, |FC|<1.55 for ρ(0αKG)/ρ(0CTL)	1.51	2.8481	0.00014	0.005466	2.095	4.27226	1e-05	0.000899	0.585	1.50004	0.0364	0.319797	205290_s_at	P	P	P	P	P	P	P	P	P	205290_s_at	9.26949	9.11292	9.34133	10.7847	11.2613	10.2085	11.2173	11.2625	11.5293
214401_at	Hs.54567.0	5075	PAX1	paired box 1	Null: FDR p>0.05, |FC|<1.55 for ρ(0αKG)/ρ(0CTL)	1.509	2.84613	2e-05	0.002077	1.245	2.37019	0.00011	0.00341	-0.264	-1.2008	0.20019	0.614488	214401_at	A	A	A	P	P	P	A	M	P	214401_at	5.83918	5.62521	6.06092	7.32882	7.23296	7.49052	6.80526	6.98455	7.47179
201897_s_at	g4502856	1163	CKS1B	CDC28 protein kinase regulatory subunit 1B	Null: FDR p>0.05, |FC|<1.55 for ρ(0αKG)/ρ(0CTL)	1.508	2.84415	8e-05	0.003967	0.93	1.90528	0.00223	0.022763	-0.578	-1.49278	0.02755	0.281638	201897_s_at	P	P	P	P	P	P	P	P	P	201897_s_at	10.0857	9.73065	9.99631	11.2927	11.0725	11.971	10.8021	10.8118	10.9885
225257_at	Hs.83532.3	90324	CCDC97	coiled-coil domain containing 97	Null: FDR p>0.05, |FC|<1.55 for ρ(0αKG)/ρ(0CTL)	1.501	2.83039	0.00071	0.014134	1.994	3.9834	9e-05	0.003054	0.492	1.40639	0.13311	0.531312	225257_at	A	A	A	P	P	A	P	P	P	225257_at	6.78825	6.93082	7.1187	8.80643	8.878	7.65743	8.81611	8.83209	9.17094
242905_at	Hs.262858.0	56902	PNO1	partner of NOB1 homolog	Null: FDR p>0.05, |FC|<1.55 for ρ(0αKG)/ρ(0CTL)	1.497	2.82255	0.00033	0.009108	1.381	2.60449	0.00059	0.009704	-0.116	-1.08373	0.67444	0.902152	242905_at	P	P	P	P	P	P	P	P	P	242905_at	7.16962	6.81136	7.69434	8.72859	9.16409	8.2742	8.73302	8.645	8.44143
219938_s_at	g13270468	9050	PSTPIP2	proline-serine-threonine phosphatase interacting protein 2	Null: FDR p>0.05, |FC|<1.55 for ρ(0αKG)/ρ(0CTL)	1.497	2.82255	4e-05	0.002615	1.013	2.0181	0.0007	0.010815	-0.485	-1.39959	0.03886	0.328216	219938_s_at	P	P	P	P	P	P	P	P	P	219938_s_at	6.54729	6.86467	6.96808	8.13402	7.99755	8.73987	7.73607	7.87708	7.80477
1565446_at	Hs2.384928.1	3251	HPRT1	hypoxanthine phosphoribosyltransferase 1	Null: FDR p>0.05, |FC|<1.55 for ρ(0αKG)/ρ(0CTL)	1.496	2.8206	2e-05	0.002048	1.641	3.11882	1e-05	0.000948	0.144	1.10496	0.46366	0.808171	1565446_at	P	P	P	P	P	P	P	P	P	1565446_at	4.2013	4.49993	4.252	5.94713	5.37669	6.11869	5.99232	5.9663	5.91669
201242_s_at	g12652534	481	ATP1B1	ATPase, Na+/K+ transporting, beta 1 polypeptide	Null: FDR p>0.05, |FC|<1.55 for ρ(0αKG)/ρ(0CTL)	1.488	2.805	0.00103	0.017518	1.419	2.674	0.00141	0.01688	-0.069	-1.04899	0.83094	0.956086	201242_s_at	P	P	P	P	P	P	P	P	P	201242_s_at	8.28937	7.98983	8.42194	10.1163	10.1387	8.90913	9.91131	9.50136	9.54559
238546_at	Hs.154669.0	6546	SLC8A1	solute carrier family 8 (sodium/calcium exchanger), member 1	Null: FDR p>0.05, |FC|<1.55 for ρ(0αKG)/ρ(0CTL)	1.488	2.805	0.00329	0.035123	1.335	2.52275	0.00616	0.043679	-0.153	-1.11188	0.69255	0.910085	238546_at	P	P	P	P	P	P	P	P	P	238546_at	6.96386	5.67563	5.99253	8.10953	8.00828	6.97959	7.78756	7.43538	7.41488
244198_at	Hs.156147.0	64901	RANBP17	RAN binding protein 17	Null: FDR p>0.05, |FC|<1.55 for ρ(0αKG)/ρ(0CTL)	1.487	2.80305	0.00085	0.015542	0.881	1.84165	0.01742	0.084921	-0.606	-1.52203	0.07652	0.432441	244198_at	P	P	P	P	P	P	P	P	P	244198_at	4.64561	5.29016	4.94679	5.84487	6.61301	6.88563	5.56508	6.30145	5.65874
229313_at	Hs.42721.0	203859	ANO5	anoctamin 5	Null: FDR p>0.05, |FC|<1.55 for ρ(0αKG)/ρ(0CTL)	1.482	2.79336	0.00055	0.012165	1.864	3.64016	0.0001	0.003322	0.382	1.30315	0.21113	0.625663	229313_at	P	P	P	P	P	P	P	P	P	229313_at	7.30835	8.44144	7.301	8.99585	9.34374	9.15682	9.60121	9.38953	9.65192
243645_at	Hs.312115.0	23114	NFASC	neurofascin	Null: FDR p>0.05, |FC|<1.55 for ρ(0αKG)/ρ(0CTL)	1.481	2.79142	1e-05	0.000959	1.773	3.41764	0	0.00031	0.292	1.22434	0.09778	0.476536	243645_at	A	A	A	A	A	A	A	A	A	243645_at	5.55349	5.55446	5.49226	6.8958	7.22662	6.91981	7.1752	7.12882	7.61555
208744_x_at	Hs.36927.1	10808	HSPH1	heat shock 105kDa/110kDa protein 1	Null: FDR p>0.05, |FC|<1.55 for ρ(0αKG)/ρ(0CTL)	1.48	2.78949	1e-05	0.001382	0.969	1.95748	0.00033	0.006694	-0.511	-1.42504	0.01575	0.221321	208744_x_at	P	P	P	P	P	P	P	P	P	208744_x_at	10.5657	10.7445	11.1912	12.3233	12.3962	12.2229	11.9892	11.74	11.6789
228850_s_at	Hs.110373.0	9353	SLIT2	slit guidance ligand 2	Null: FDR p>0.05, |FC|<1.55 for ρ(0αKG)/ρ(0CTL)	1.48	2.78949	0.00459	0.043026	1.994	3.9834	0.0007	0.010824	0.514	1.428	0.22545	0.639862	228850_s_at	P	P	P	P	P	P	P	P	P	228850_s_at	6.71416	7.98223	8.30533	9.54657	9.26802	8.62672	9.59468	9.46271	9.92515
223837_at	g12654538	51454	GULP1	GULP, engulfment adaptor PTB domain containing 1	Null: FDR p>0.05, |FC|<1.55 for ρ(0αKG)/ρ(0CTL)	1.478	2.78562	0.00289	0.032502	1.534	2.89588	0.0023	0.023212	0.056	1.03958	0.88076	0.971387	223837_at	P	P	P	P	P	P	P	P	P	223837_at	4.96271	5.94932	5.75015	6.60571	6.60441	7.88472	6.94823	7.17543	7.13998
208311_at	g4758467	9248	GPR50	G protein-coupled receptor 50	Null: FDR p>0.05, |FC|<1.55 for ρ(0αKG)/ρ(0CTL)	1.477	2.78369	0.00331	0.035207	1.283	2.43344	0.00738	0.049157	-0.194	-1.14393	0.61535	0.877423	208311_at	P	P	P	P	P	P	P	P	P	208311_at	7.29025	7.15355	5.96451	8.58421	8.59264	7.66161	8.34752	7.90269	8.00666
238455_at	Hs.72639.0	84898	PLXDC2	plexin domain containing 2	Null: FDR p>0.05, |FC|<1.55 for ρ(0αKG)/ρ(0CTL)	1.475	2.77984	0.00055	0.012086	1.428	2.69073	0.00068	0.010699	-0.046	-1.0324	0.87311	0.969235	238455_at	P	P	P	P	P	P	P	P	P	238455_at	4.52948	5.16456	5.60163	7.01622	6.44425	6.25909	6.71626	6.43715	6.4272
218856_at	g7706171	27242	TNFRSF21	tumor necrosis factor receptor superfamily, member 21	Null: FDR p>0.05, |FC|<1.55 for ρ(0αKG)/ρ(0CTL)	1.47	2.77022	0.00378	0.038255	1.251	2.38006	0.0093	0.056858	-0.219	-1.16393	0.57785	0.862075	218856_at	P	P	P	P	P	P	P	P	P	218856_at	9.35758	9.5897	9.88577	11.5771	11.6241	10.0428	10.698	10.8607	11.0282
243893_at	Hs.282231.0	3748	KCNC3	potassium channel, voltage gated Shaw related subfamily C, member 3	Null: FDR p>0.05, |FC|<1.55 for ρ(0αKG)/ρ(0CTL)	1.468	2.76638	0.00015	0.005779	1.56	2.94854	0.0001	0.003171	0.091	1.06511	0.7065	0.915453	243893_at	P	P	M	P	P	P	P	P	P	243893_at	5.45875	5.84735	5.56055	7.35731	7.41923	6.49493	7.23139	7.13168	7.18235
201578_at	g4885556	5420	PODXL	podocalyxin-like	Null: FDR p>0.05, |FC|<1.55 for ρ(0αKG)/ρ(0CTL)	1.468	2.76638	0.00012	0.005233	1.986	3.96137	1e-05	0.000948	0.518	1.43197	0.04945	0.361613	201578_at	P	P	P	P	P	P	P	P	P	201578_at	10.3653	11.1513	11.1418	12.5119	12.4505	12.0985	13.0755	12.8436	12.6969
219042_at	g10440565	11178	LZTS1	leucine zipper, putative tumor suppressor 1	Null: FDR p>0.05, |FC|<1.55 for ρ(0αKG)/ρ(0CTL)	1.467	2.76446	9e-05	0.004467	1.188	2.27837	0.00044	0.008003	-0.278	-1.21251	0.23779	0.651809	219042_at	A	A	A	M	P	A	A	A	A	219042_at	5.31079	5.62363	5.99232	7.20551	7.39175	6.72927	6.93394	6.9316	6.62635
229126_at	Hs.7337.1	55266	TMEM19	transmembrane protein 19	Null: FDR p>0.05, |FC|<1.55 for ρ(0αKG)/ρ(0CTL)	1.467	2.76446	0.00071	0.014093	1.205	2.30537	0.00255	0.024862	-0.263	-1.19997	0.3908	0.766918	229126_at	P	P	P	P	P	P	P	P	P	229126_at	7.4294	7.82866	8.43265	9.69297	9.59412	8.80594	9.25579	9.01765	9.03193
210026_s_at	g13488606	29775	CARD10	caspase recruitment domain family, member 10	Null: FDR p>0.05, |FC|<1.55 for ρ(0αKG)/ρ(0CTL)	1.466	2.76255	3e-05	0.002353	1.258	2.39164	0.0001	0.003281	-0.209	-1.15589	0.30244	0.703767	210026_s_at	P	P	P	P	P	P	P	P	P	210026_s_at	8.1879	7.73019	8.09626	9.6482	9.67273	9.09261	9.11944	9.28328	9.38424
209119_x_at	Hs.288869.0	7026	NR2F2	nuclear receptor subfamily 2, group F, member 2	Null: FDR p>0.05, |FC|<1.55 for ρ(0αKG)/ρ(0CTL)	1.466	2.76255	0.00064	0.013273	1.331	2.51577	0.00123	0.015473	-0.136	-1.09885	0.64707	0.891017	209119_x_at	P	P	P	P	P	P	P	P	P	209119_x_at	10.4563	10.3363	10.7865	12.3273	12.3329	11.3183	11.6333	11.7269	12.2109
238413_at	Hs.142569.0	100131998	RRN3P3	RRN3 homolog, RNA polymerase I transcription factor pseudogene 3	Null: FDR p>0.05, |FC|<1.55 for ρ(0αKG)/ρ(0CTL)	1.466	2.76255	0.00399	0.039501	1.155	2.22684	0.01438	0.075124	-0.311	-1.24057	0.43673	0.795003	238413_at	P	P	P	P	P	P	P	P	P	238413_at	6.92981	6.04476	5.44806	8.14024	7.63825	7.04121	7.12083	7.57552	7.1915
214492_at	Hs.151899.1	6444	SGCD	sarcoglycan delta	Null: FDR p>0.05, |FC|<1.55 for ρ(0αKG)/ρ(0CTL)	1.464	2.75872	0.00384	0.038651	1.64	3.11666	0.00192	0.020586	0.176	1.12975	0.65273	0.893116	214492_at	A	A	A	A	A	A	A	A	A	214492_at	3.77532	4.05939	3.95982	5.74008	5.96194	4.4842	5.32428	5.24606	6.14463
201516_at	g4507208	6723	SRM	spermidine synthase	Null: FDR p>0.05, |FC|<1.55 for ρ(0αKG)/ρ(0CTL)	1.464	2.75872	1e-05	0.001065	0.909	1.87774	0.00031	0.006467	-0.555	-1.46917	0.0072	0.154755	201516_at	P	P	P	P	P	P	P	P	P	201516_at	8.7164	8.34317	8.67957	9.81964	10.0112	10.3004	9.42783	9.42783	9.6108
203119_at	g13129103	79080	CCDC86	coiled-coil domain containing 86	Null: FDR p>0.05, |FC|<1.55 for ρ(0αKG)/ρ(0CTL)	1.463	2.75681	0	0.000286	1.337	2.52625	0	0.000292	-0.127	-1.09202	0.30965	0.709939	203119_at	P	P	P	P	P	P	P	P	P	203119_at	9.08043	9.11185	9.12249	10.501	10.7493	10.455	10.4198	10.375	10.5306
208790_s_at	g11034808	284119	PTRF	polymerase I and transcript release factor	Null: FDR p>0.05, |FC|<1.55 for ρ(0αKG)/ρ(0CTL)	1.463	2.75681	0.00066	0.013538	1.221	2.33108	0.00217	0.022293	-0.242	-1.18263	0.42101	0.78561	208790_s_at	P	P	P	P	P	P	P	P	P	208790_s_at	8.50589	8.31577	7.91817	9.99519	10.1304	9.00405	9.64472	9.32522	9.43263
201004_at	g5454089	6748	SSR4	signal sequence receptor, delta	Null: FDR p>0.05, |FC|<1.55 for ρ(0αKG)/ρ(0CTL)	1.462	2.7549	0.00055	0.012119	1.079	2.11257	0.00388	0.032456	-0.382	-1.30315	0.20469	0.619172	201004_at	P	P	P	P	P	P	P	P	P	201004_at	11.4159	10.6814	11.4866	13.0123	12.8652	12.0917	12.1247	12.4184	12.2786
226834_at	Hs.28462.0	79827	CLMP	CXADR-like membrane protein	Null: FDR p>0.05, |FC|<1.55 for ρ(0αKG)/ρ(0CTL)	1.46	2.75108	3e-05	0.002136	1.904	3.74249	0	0.000454	0.445	1.36131	0.04051	0.3341	226834_at	P	P	P	P	P	P	P	P	P	226834_at	11.5186	11.2453	11.9511	13.2065	13.0805	12.8071	13.5352	13.4283	13.4642
206275_s_at	g7662283	9645	MICAL2	microtubule associated monooxygenase, calponin and LIM domain containing 2	Null: FDR p>0.05, |FC|<1.55 for ρ(0αKG)/ρ(0CTL)	1.46	2.75108	2e-05	0.0018	1.847	3.59751	0	0.000449	0.387	1.30767	0.05979	0.390458	206275_s_at	P	P	P	P	P	P	P	P	P	206275_s_at	8.23232	8.08852	8.4962	9.6965	10.0782	9.42256	10.1778	10.0465	10.1326
201348_at	g6006000	2878	GPX3	glutathione peroxidase 3	Null: FDR p>0.05, |FC|<1.55 for ρ(0αKG)/ρ(0CTL)	1.459	2.74918	0.00034	0.009307	1.035	2.04911	0.00332	0.029366	-0.424	-1.34164	0.13881	0.540371	201348_at	P	P	P	P	P	P	P	P	P	201348_at	7.97583	7.78702	7.02341	9.17918	9.25601	8.72809	8.77615	8.34266	8.77172
224443_at	g13543694	84791	LINC00467	long intergenic non-protein coding RNA 467	Null: FDR p>0.05, |FC|<1.55 for ρ(0αKG)/ρ(0CTL)	1.459	2.74918	0.00292	0.032691	0.86	1.81504	0.04107	0.148767	-0.6	-1.51572	0.13098	0.528906	224443_at	P	P	P	P	P	P	P	P	P	224443_at	6.12973	6.90586	5.64874	7.49101	7.27041	8.30124	6.69423	7.25396	7.3158
212022_s_at	Hs.80976.1	4288	MKI67	marker of proliferation Ki-67	Null: FDR p>0.05, |FC|<1.55 for ρ(0αKG)/ρ(0CTL)	1.459	2.74918	0.00012	0.005117	1.123	2.17799	0.00077	0.011471	-0.336	-1.26225	0.17081	0.581028	212022_s_at	P	P	P	P	P	P	P	P	P	212022_s_at	11.0723	10.5445	10.0776	12.1738	12.0116	11.8858	11.6025	11.6457	11.8155
209908_s_at	Hs.169300.1	7042	TGFB2	transforming growth factor beta 2	Null: FDR p>0.05, |FC|<1.55 for ρ(0αKG)/ρ(0CTL)	1.459	2.74918	0.00265	0.030948	1.856	3.62003	0.00055	0.009312	0.396	1.31585	0.29333	0.697076	209908_s_at	P	A	A	P	P	A	P	P	P	209908_s_at	4.80908	4.84845	4.3991	6.87756	6.19901	5.35844	6.66901	6.11283	6.84159
223312_at	g13477208	84279	PRADC1	protease-associated domain containing 1	Null: FDR p>0.05, |FC|<1.55 for ρ(0αKG)/ρ(0CTL)	1.458	2.74727	8e-05	0.003995	0.868	1.82513	0.0028	0.026257	-0.59	-1.50525	0.02181	0.254038	223312_at	A	A	A	P	P	P	P	P	P	223312_at	6.43361	6.76778	6.75745	8.21922	8.1373	7.97594	7.09392	7.49783	7.97073
46142_at	4858794	64788	LMF1	lipase maturation factor 1	Null: FDR p>0.05, |FC|<1.55 for ρ(0αKG)/ρ(0CTL)	1.456	2.74347	0.0057	0.048877	1.619	3.07162	0.00308	0.02788	0.162	1.11884	0.69655	0.911345	46142_at	P	P	P	P	P	P	P	P	P	46142_at	6.12813	7.55967	6.30719	8.26529	8.46138	7.63705	8.05007	7.95443	8.8467
209230_s_at	g5732669	26471	NUPR1	nuclear protein 1, transcriptional regulator	Null: FDR p>0.05, |FC|<1.55 for ρ(0αKG)/ρ(0CTL)	1.456	2.74347	4e-05	0.002792	1.637	3.11018	2e-05	0.001172	0.18	1.13288	0.3851	0.762251	209230_s_at	A	A	A	P	P	P	P	P	P	209230_s_at	7.25292	7.05959	7.45606	8.62667	8.45503	9.05637	8.64134	8.88221	9.15561
1554822_at	Hs2.128653.3	57157	PHTF2	putative homeodomain transcription factor 2	Null: FDR p>0.05, |FC|<1.55 for ρ(0αKG)/ρ(0CTL)	1.456	2.74347	0.00195	0.0255	0.855	1.80876	0.03194	0.126262	-0.601	-1.51677	0.10829	0.494821	1554822_at	P	P	P	P	P	P	P	P	P	1554822_at	7.35135	6.5979	6.38672	8.13464	7.6894	8.87856	7.49262	7.44055	7.967
227093_at	Hs.11387.1	57602	USP36	ubiquitin specific peptidase 36	Null: FDR p>0.05, |FC|<1.55 for ρ(0αKG)/ρ(0CTL)	1.455	2.74157	0.00025	0.007685	1.102	2.14652	0.00166	0.018787	-0.353	-1.27721	0.1891	0.603487	227093_at	P	P	P	P	P	P	P	P	P	227093_at	7.41286	6.51863	7.13917	8.71147	8.64467	8.07903	8.0757	8.2984	8.00131
202888_s_at	g4502094	290	ANPEP	alanyl (membrane) aminopeptidase	Null: FDR p>0.05, |FC|<1.55 for ρ(0αKG)/ρ(0CTL)	1.454	2.73967	0.0001	0.004525	1.64	3.11666	4e-05	0.001786	0.185	1.13682	0.41919	0.784466	202888_s_at	P	P	P	P	P	P	P	P	P	202888_s_at	10.1609	10.6866	10.9454	12.0142	12.2608	11.8807	12.1412	12.0461	12.5242
224576_at	Hs.180428.1	57222	ERGIC1	endoplasmic reticulum-golgi intermediate compartment 1	Null: FDR p>0.05, |FC|<1.55 for ρ(0αKG)/ρ(0CTL)	1.452	2.73587	0.00034	0.009136	1.188	2.27837	0.00132	0.016153	-0.264	-1.2008	0.33535	0.729901	224576_at	P	P	P	P	P	P	P	P	P	224576_at	9.57217	9.63686	9.39838	11.3313	11.1136	10.5183	10.4897	10.4462	11.2367
242455_at	Hs.175373.0	5454	POU3F2	POU class 3 homeobox 2	Null: FDR p>0.05, |FC|<1.55 for ρ(0αKG)/ρ(0CTL)	1.452	2.73587	0.00176	0.023946	1.873	3.66293	0.00031	0.006494	0.421	1.33886	0.23515	0.649438	242455_at	P	P	P	P	P	P	P	P	P	242455_at	6.07397	6.18588	7.44271	8.00483	8.32279	7.73196	8.5057	8.48937	8.32729
214193_s_at	Hs.173381.1	27042	DIEXF	digestive organ expansion factor homolog (zebrafish)	Null: FDR p>0.05, |FC|<1.55 for ρ(0αKG)/ρ(0CTL)	1.45	2.73208	0.00307	0.033678	1.975	3.93128	0.0004	0.007633	0.525	1.43893	0.18034	0.593293	214193_s_at	P	P	P	P	P	P	P	P	P	214193_s_at	9.03823	8.95523	9.68902	11.0142	11.1945	9.82339	11.4031	11.3663	10.8374
235085_at	Hs.29068.0	157285	SGK223	homolog of rat pragma of Rnd2	Null: FDR p>0.05, |FC|<1.55 for ρ(0αKG)/ρ(0CTL)	1.449	2.73019	1e-05	0.001414	1.513	2.85403	1e-05	0.000833	0.064	1.04536	0.71287	0.917996	235085_at	P	P	P	P	P	P	P	P	P	235085_at	8.04293	8.60847	8.55028	9.79527	10.0449	9.70754	9.9143	9.84697	9.97934
202001_s_at	g4505358	4700	NDUFA6	NADH dehydrogenase (ubiquinone) 1 alpha subcomplex, 6, 14kDa	Null: FDR p>0.05, |FC|<1.55 for ρ(0αKG)/ρ(0CTL)	1.448	2.7283	1e-05	0.001257	1.098	2.14058	9e-05	0.003045	-0.35	-1.27456	0.06152	0.394585	202001_s_at	P	P	P	P	P	P	P	P	P	202001_s_at	10.8307	10.9763	11.0657	12.2811	12.1883	12.7469	11.9107	12.102	12.1526
218096_at	g8922941	55326	AGPAT5	1-acylglycerol-3-phosphate O-acyltransferase 5	Null: FDR p>0.05, |FC|<1.55 for ρ(0αKG)/ρ(0CTL)	1.445	2.72263	0.00068	0.0137	1.508	2.84415	0.0005	0.008779	0.063	1.04464	0.83042	0.955875	218096_at	P	P	P	P	P	P	P	P	P	218096_at	10.3911	10.218	10.5546	12.2464	12.192	11.0603	11.9939	11.8175	11.8758
205103_at	g5453624	10485	C1orf61	chromosome 1 open reading frame 61	Null: FDR p>0.05, |FC|<1.55 for ρ(0αKG)/ρ(0CTL)	1.445	2.72263	0.00202	0.026133	1.41	2.65737	0.00235	0.023594	-0.035	-1.02456	0.92029	0.982044	205103_at	A	A	A	P	P	P	P	P	P	205103_at	5.04346	5.66049	5.19531	6.17425	6.46436	7.59589	6.54557	6.67984	6.90519
241763_s_at	Hs.97079.0	114907	FBXO32	F-box protein 32	Null: FDR p>0.05, |FC|<1.55 for ρ(0αKG)/ρ(0CTL)	1.445	2.72263	0.00189	0.025072	1.515	2.85799	0.00139	0.016759	0.07	1.04972	0.83787	0.958426	241763_s_at	P	P	P	P	P	P	P	P	P	241763_s_at	7.71175	7.58757	6.37487	8.79905	8.42122	8.78792	8.4984	8.64014	9.07994
214960_at	Hs.227913.1	8539	API5	apoptosis inhibitor 5	Null: FDR p>0.05, |FC|<1.55 for ρ(0αKG)/ρ(0CTL)	1.444	2.72074	0.00032	0.008795	1.321	2.49839	0.00059	0.009707	-0.122	-1.08824	0.64351	0.88974	214960_at	P	P	P	P	P	P	P	P	P	214960_at	6.70936	7.88375	7.37461	8.90888	8.5886	8.8008	8.58818	8.70735	8.63618
205399_at	g4758127	9201	DCLK1	doublecortin-like kinase 1	Null: FDR p>0.05, |FC|<1.55 for ρ(0αKG)/ρ(0CTL)	1.443	2.71886	0.00024	0.007529	1.526	2.87986	0.00016	0.004204	0.083	1.05922	0.74274	0.927969	205399_at	P	P	P	P	P	P	P	P	P	205399_at	6.97415	7.27405	7.15844	8.87236	8.93147	7.93268	8.66571	8.74002	8.5798
223995_at	g13111796	56996	SLC12A9	solute carrier family 12, member 9	Null: FDR p>0.05, |FC|<1.55 for ρ(0αKG)/ρ(0CTL)	1.44	2.71321	0.00393	0.039151	0.848	1.8	0.04969	0.168071	-0.592	-1.50733	0.14786	0.552784	223995_at	A	P	A	P	P	P	P	P	P	223995_at	6.29105	6.17769	6.07306	8.33563	7.62906	6.89804	6.61283	6.76562	7.70731
205264_at	g6912245	10849	CD3EAP	CD3e molecule, epsilon associated protein	Null: FDR p>0.05, |FC|<1.55 for ρ(0αKG)/ρ(0CTL)	1.438	2.70945	0.00027	0.008114	1.053	2.07484	0.00224	0.022771	-0.385	-1.30586	0.15703	0.564772	205264_at	P	P	P	P	P	P	P	P	P	205264_at	7.56736	6.97528	7.2833	8.91319	9.10012	8.12653	8.34296	8.36376	8.27873
208918_s_at	Hs.220324.2	65220	NADK	NAD kinase	Null: FDR p>0.05, |FC|<1.55 for ρ(0αKG)/ρ(0CTL)	1.437	2.70757	8e-05	0.004132	1.805	3.49429	1e-05	0.001039	0.368	1.29056	0.11638	0.506759	208918_s_at	P	P	P	P	P	P	P	P	P	208918_s_at	9.70141	9.50003	9.06675	10.9243	10.5289	11.1257	11.028	11.2115	11.4435
218084_x_at	g11612664	53827	FXYD5	FXYD domain containing ion transport regulator 5	Null: FDR p>0.05, |FC|<1.55 for ρ(0αKG)/ρ(0CTL)	1.435	2.70382	9e-05	0.004503	1.078	2.11111	0.00075	0.011299	-0.357	-1.28076	0.13223	0.530381	218084_x_at	P	P	P	P	P	P	P	P	P	218084_x_at	10.8822	10.3846	10.3279	12.0303	12.2955	11.5732	11.7063	11.6949	11.4269
224920_x_at	Hs.278528.1	91663	MYADM	myeloid-associated differentiation marker	Null: FDR p>0.05, |FC|<1.55 for ρ(0αKG)/ρ(0CTL)	1.435	2.70382	0.00123	0.019405	1.358	2.5633	0.00176	0.019508	-0.077	-1.05482	0.80932	0.949646	224920_x_at	P	P	P	P	P	P	P	P	P	224920_x_at	9.55679	8.98115	8.26312	10.7272	10.4347	9.9427	10.35	10.2146	10.3094
1561615_s_at	Hs2.407280.4	6546	SLC8A1	solute carrier family 8 (sodium/calcium exchanger), member 1	Null: FDR p>0.05, |FC|<1.55 for ρ(0αKG)/ρ(0CTL)	1.434	2.70195	0.00028	0.00832	1.049	2.0691	0.00233	0.023425	-0.385	-1.30586	0.15832	0.56618	1561615_s_at	P	P	P	P	P	P	P	P	P	1561615_s_at	7.6762	7.11592	6.67436	8.58708	8.35425	8.82786	8.42946	7.97689	8.20859
209647_s_at	Hs.169836.1	9655	SOCS5	suppressor of cytokine signaling 5	Null: FDR p>0.05, |FC|<1.55 for ρ(0αKG)/ρ(0CTL)	1.432	2.69821	0.00016	0.005999	1.453	2.73777	0.00014	0.004007	0.021	1.01466	0.92962	0.984434	209647_s_at	P	P	P	P	P	P	P	P	P	209647_s_at	10.172	9.45968	9.80869	11.3477	11.4757	10.9141	11.5208	11.3275	10.9521
32091_at	4864563	9673	SLC25A44	solute carrier family 25, member 44	Null: FDR p>0.05, |FC|<1.55 for ρ(0αKG)/ρ(0CTL)	1.429	2.6926	0.00142	0.021001	1.079	2.11257	0.00755	0.049829	-0.349	-1.27368	0.29594	0.698988	32091_at	P	P	P	P	P	P	P	P	P	32091_at	9.19684	9.74409	9.60003	11.3845	11.3292	10.1134	10.4861	10.6545	10.6386
1554010_at	Hs2.20894.2	3340	NDST1	N-deacetylase/N-sulfotransferase (heparan glucosaminyl) 1	Null: FDR p>0.05, |FC|<1.55 for ρ(0αKG)/ρ(0CTL)	1.425	2.68515	1e-05	0.001382	1.367	2.57934	2e-05	0.001185	-0.058	-1.04102	0.73308	0.924857	1554010_at	P	P	P	P	P	P	P	P	P	1554010_at	8.94148	8.54483	8.34515	9.96563	10.0805	10.0594	9.88701	10.167	9.877
243324_x_at	Hs.100235.0	3842	TNPO1	transportin 1	Null: FDR p>0.05, |FC|<1.55 for ρ(0αKG)/ρ(0CTL)	1.425	2.68515	0.00223	0.027776	0.821	1.76663	0.03776	0.140834	-0.604	-1.51992	0.10688	0.493111	243324_x_at	P	P	P	P	P	P	P	P	P	243324_x_at	5.0311	5.33433	6.33539	7.018	6.49587	7.46103	6.43323	6.31715	6.41266
212464_s_at	Hs.287820.1	2335	FN1	fibronectin 1	Null: FDR p>0.05, |FC|<1.55 for ρ(0αKG)/ρ(0CTL)	1.422	2.67957	0.00012	0.005263	1.802	3.48703	2e-05	0.001252	0.38	1.30134	0.12065	0.513908	212464_s_at	P	P	P	P	P	P	P	P	P	212464_s_at	12.0118	12.1525	12.0318	13.78	13.7838	12.8973	13.8427	13.8322	13.926
209567_at	g12804750	23212	RRS1	ribosome biogenesis regulator homolog	Null: FDR p>0.05, |FC|<1.55 for ρ(0αKG)/ρ(0CTL)	1.42	2.67586	0.00222	0.027618	1.108	2.15547	0.00927	0.056784	-0.313	-1.24229	0.37576	0.755889	209567_at	P	P	P	P	P	P	P	P	P	209567_at	9.91965	10.0031	10.0997	11.9218	11.8235	10.538	11.118	10.8099	11.4171
222701_s_at	Hs.323164.0	79145	CHCHD7	coiled-coil-helix-coiled-coil-helix domain containing 7	Null: FDR p>0.05, |FC|<1.55 for ρ(0αKG)/ρ(0CTL)	1.418	2.67215	0.00146	0.021405	0.839	1.78881	0.02558	0.109065	-0.579	-1.49381	0.09807	0.476967	222701_s_at	P	P	P	P	P	P	P	P	P	222701_s_at	10.6993	10.8734	9.84592	11.7583	11.4674	12.4472	11.1233	11.2675	11.5442
239342_at	Hs.165827.0	8525	DGKZ	diacylglycerol kinase, zeta	Null: FDR p>0.05, |FC|<1.55 for ρ(0αKG)/ρ(0CTL)	1.418	2.67215	0.00034	0.009145	1.259	2.3933	0.00077	0.011471	-0.159	-1.11651	0.54575	0.847604	239342_at	P	A	P	P	P	P	P	P	P	239342_at	4.35138	4.44779	4.91448	5.79042	5.95819	6.21762	5.55171	5.55214	6.38613
220029_at	g8923311	54898	ELOVL2	ELOVL fatty acid elongase 2	Null: FDR p>0.05, |FC|<1.55 for ρ(0αKG)/ρ(0CTL)	1.418	2.67215	0.00028	0.00832	1.532	2.89186	0.00016	0.004297	0.114	1.08222	0.65666	0.894666	220029_at	P	P	P	P	P	P	P	P	P	220029_at	6.93885	6.29105	6.97439	8.56135	8.07613	7.82185	8.53688	8.21071	8.05271
224252_s_at	g9957274	53827	FXYD5	FXYD domain containing ion transport regulator 5	Null: FDR p>0.05, |FC|<1.55 for ρ(0αKG)/ρ(0CTL)	1.418	2.67215	0.00018	0.006341	1.081	2.1155	0.00118	0.015094	-0.337	-1.26313	0.17919	0.591795	224252_s_at	P	P	P	P	P	P	P	P	P	224252_s_at	10.9386	10.3853	10.317	11.9993	12.3579	11.5369	11.6695	11.7172	11.4957
1559611_at	Hs2.232771.1	641384	TMEM75	transmembrane protein 75	Null: FDR p>0.05, |FC|<1.55 for ρ(0αKG)/ρ(0CTL)	1.418	2.67215	0.00024	0.007655	1.914	3.76853	2e-05	0.001416	0.495	1.40932	0.07128	0.419938	1559611_at	P	P	P	P	P	P	P	P	P	1559611_at	7.07292	6.61057	6.96208	8.88646	8.13142	7.88313	8.76399	8.84768	8.77507
226064_s_at	Hs.74637.1	84649	DGAT2	diacylglycerol O-acyltransferase 2	Null: FDR p>0.05, |FC|<1.55 for ρ(0αKG)/ρ(0CTL)	1.417	2.6703	4e-05	0.002494	1.348	2.54559	5e-05	0.002174	-0.069	-1.04899	0.72035	0.920629	226064_s_at	A	A	A	P	P	P	P	P	P	226064_s_at	6.86037	6.73355	6.97593	8.49741	8.49348	7.83092	8.16757	8.11094	8.33544
221759_at	Hs.294005.0	92579	G6PC3	glucose 6 phosphatase, catalytic, 3	Null: FDR p>0.05, |FC|<1.55 for ρ(0αKG)/ρ(0CTL)	1.417	2.6703	0.00176	0.02399	0.942	1.92119	0.0171	0.083989	-0.474	-1.38896	0.17591	0.588111	221759_at	P	P	P	P	P	P	P	P	P	221759_at	8.46015	7.66014	7.35274	9.43851	9.59875	8.68562	8.60344	8.61368	9.08302
223316_at	g13276630	83643	CCDC3	coiled-coil domain containing 3	Null: FDR p>0.05, |FC|<1.55 for ρ(0αKG)/ρ(0CTL)	1.416	2.66845	1e-05	0.001382	1.429	2.6926	1e-05	0.000948	0.013	1.00905	0.93814	0.986381	223316_at	P	P	A	P	P	P	P	P	P	223316_at	7.59763	7.52776	7.11274	8.7798	8.76525	8.94139	8.81695	8.64934	9.05951
[truncated: 3,740 more rows]

## Sheet: SampleInfo
observation	BioRep
18911_1092_Rho+_1_Rep_1_(HG-U133_Plus_2)	Rho+ Replicate 1
18912_1092_Rho+_2_Rep_2_(HG-U133_Plus_2)	Rho+ Replicate 2
18913_1092_Rho+_3_Rep_3_(HG-U133_Plus_2)	Rho+ Replicate 3
[truncated: 6 more rows]

## Sheet: README
# Note:
[truncated: 30 more rows]

## Sheet: Single Gene Annotations
Probe Set ID	Transcript ID (Array Design)	Entrez Gene	Gene Symbol	Gene Title	log2FC ρ(0CTL)/ρ(+)	Fold-Change ρ(0CTL)/ρ(+)	p.value (Rho+ vs Rho0_Ctl)	FDR (Rho+ vs Rho0_Ctl)	log2FC ρ(0αKG)/ρ(+)	Fold-Change ρ(0αKG)/ρ(+)	p.value (Rho+ vs Rho0_KG)	FDR (Rho+ vs Rho0_KG)	log2FC ρ(0αKG)/ρ(0CTL)	Fold-Change ρ(0αKG)/ρ(0CTL)	p.value (Rho0_KG vs Rho0_Ctl)	FDR (Rho0_KG vs Rho0_Ctl)
[truncated: 42,476 more rows]

[truncated: 2 more sheets: mtDNA Effect Size Thresholding, mtDNA Annotations]
