# Supplementary material for: Mitochondrial acetyl-CoA reversibly regulates locus-specific histone acetylation and gene expression
Source: Life Sci Alliance. 2019 Feb 8;2(1):e201800228. doi: 10.26508/lsa.201800228 (PMC6369536; doi:10.26508/lsa.201800228)
Supplement: Supplementary file 5 [file LSA-2018-00228_TableS5.xlsx]

## Sheet: Sheet1
HYPERmethylated rho0: Δ(%mCG)>0 v. ρ(+)		hypomethylated rho0: Δ(%mCG)<0 v. rho+
αKG effect: rescued towards	αKG effect: exacerbated away from rho+	αKG effect: gene expression rescued	αKG effect: exacerbated away from rho+
ABCG1	ADAMTS1	BRCA1	ADAMTS5
BHLHE40	DLC1	C1orf52	ATF7IP2
C11orf45	FOSL2	CDCA2	BMP2
CBX2	GREM1	CLMN	BMP4
CLCN6	KIF1A	DIP2A	COL7A1
COX5A	LAMA4	DNAH1	COX18
DGKE	LNX1	DNASE1	DCC
DLX1	LRRC15	DST	ELOVL6
FGF9	MAGEL2	ENO2	IDH1
HPSE	MANSC1	FAM84B	NOVA1
JUNB	MYEF2	FOXF1	SLFN11
KDM6B	RBM15	GDPD1	STK17B
KLF3	SLC40A1	GPATCH2L	TBX3
KLHL29	SNN	HIST1H4B	WNT7A
KSR1	SPATS2L	ISG20L2	XYLT1
LIF	TRIM27	MDM1	ZNF391
LUC7L	TSPYL4	MEGF11
MAP3K12	TXNIP	PCNX
MCTP2	VASN	PDGFD
NCOA7	ZNF268	RFPL3S
NDUFA11	ZNF304	RGS4
NLRP3	ZNF776	RSPO2
PDE12	ZNF836
PFDN6
PIK3CD
PLD6
PPP1R9A
RUNX1T1
SEMA4B
SH3TC2
SIM2
SOX13
SOX4
SPATS2
SPC24
TCEA1
TFAP2A
TRIB2
ZNF117
ZNHIT1
